# Supplementary material for: RNA isoform diversity, splicing variants, and switching in single cells of the Alzheimer’s disease brain
Source: Research Square preprint supplement (doi:10.21203/rs.3.rs-7436496/v1), 2025-09-29
Supplement: Supplementary file 1 [file 1d5e66c13e417f5428ddfbeb.xlsx]

## Sheet: README
Supplementary Table 6
DESeq2 output from analyzing pseudobulked confident isoforms

## Sheet: DET
isoform_id	baseMean	log2FoldChange	lfcSE	stat	pvalue	padj	gene	category	subcategory
194941	140.368	25.171	2.36998	10.6207	2.38661e-26	5.34552e-22	PDE2A	incomplete-splice_match	intron_retention
168512	82.9719	24.4366	2.50353	9.76082	1.65804e-22	1.85684e-18	CDIP1	incomplete-splice_match	3prime_fragment
173308	51.9035	23.7814	2.53747	9.37211	7.10939e-21	5.30787e-17	TNFRSF25	full-splice_match	alternative_3end5end
178972	184.443	24.7477	2.71551	9.11347	7.97856e-20	4.46759e-16	CHI3L1	novel_in_catalog	combination_of_known_junctions,intron_retention
457946	51.9271	21.987	2.58272	8.5131	1.69344e-17	7.58592e-14	RAF1	incomplete-splice_match	3prime_fragment
461742	18.329	22.3288	2.99426	7.4572	8.83774e-14	3.2459e-10	CRMP1	full-splice_match	alternative_5end
218573	17.6443	22.2748	2.99432	7.43901	1.01443e-13	3.2459e-10	GOT2	full-splice_match	alternative_3end
173630	7.15231	21.0001	2.88085	7.28955	3.10999e-13	8.70718e-10	NOC2L	incomplete-splice_match	3prime_fragment
439724	6.6717	20.9232	2.99673	6.982	2.91006e-12	7.24217e-09	ARMC5	incomplete-splice_match	3prime_fragment
146398	42.5073	-5.59419	0.944572	-5.92246	3.17164e-09	7.10384e-06	LUC7L2	full-splice_match	alternative_5end
78080	121.713	9.0322	1.53412	5.88754	3.91979e-09	7.98141e-06	SIN3B	incomplete-splice_match	3prime_fragment
196446	168.912	9.99758	1.83608	5.44508	5.17809e-08	9.66491e-05	APLP2	incomplete-splice_match	3prime_fragment
166325	23.8369	7.59209	1.43705	5.28311	1.27007e-07	0.000218823	FLOT1	incomplete-splice_match	3prime_fragment
285207	136.035	10.0537	1.91988	5.23662	1.63543e-07	0.000261645	GOLGA7	full-splice_match	alternative_3end
67354	48.2002	-5.1525	1.01312	-5.08578	3.66124e-07	0.000546696	MBTPS1	full-splice_match	alternative_5end
419841	5.21331	5.72468	1.14452	5.00181	5.67937e-07	0.00079504	SRGAP2D_ENSG00000289318	full-splice_match	reference_match
431468	78.841	8.74485	1.7632	4.95965	7.06217e-07	0.00088559	CERS5	incomplete-splice_match	3prime_fragment
80889	92.6922	-7.0806	1.42807	-4.95814	7.11699e-07	0.00088559	TMEM259	full-splice_match	mono-exon
513054	62.2851	-9.21921	1.89018	-4.87742	1.07484e-06	0.00126707	STAG3L5P-PVRIG2P-PILRB	incomplete-splice_match	3prime_fragment
26371	14.3483	-6.30437	1.29614	-4.86398	1.15051e-06	0.00128846	FAM13C	incomplete-splice_match	3prime_fragment
36565	39.4144	5.40748	1.11519	4.84895	1.24117e-06	0.00131591	CDK2AP2	full-splice_match	alternative_5end
168332	30.818	8.35633	1.72619	4.8409	1.29252e-06	0.00131591	ENSG00000290515	novel_in_catalog	combination_of_known_splicesites
354048	140.853	11.6489	2.42418	4.80529	1.54528e-06	0.00150483	MAST1	incomplete-splice_match	3prime_fragment
98069	171.862	9.93054	2.08253	4.76851	1.85597e-06	0.00173209	PTPRN	incomplete-splice_match	3prime_fragment
176818	25.6553	6.24986	1.31533	4.75155	2.01865e-06	0.00173899	HMGCL	full-splice_match	reference_match
42346	60.4773	-5.65782	1.18922	-4.75759	1.95915e-06	0.00173899	ATP5MC2	full-splice_match	alternative_5end
248986	163.868	8.13008	1.73124	4.69611	2.65168e-06	0.00219972	APP	incomplete-splice_match	3prime_fragment
284699	14.0665	7.22354	1.54946	4.66199	3.1317e-06	0.00236133	PPP2R2A	incomplete-splice_match	3prime_fragment
120415	13.0649	5.32415	1.13996	4.67046	3.00521e-06	0.00236133	HADH	full-splice_match	alternative_3end5end
225696	44.3734	7.56713	1.62386	4.65996	3.16277e-06	0.00236133	SRSF1	novel_in_catalog	combination_of_known_junctions,intron_retention
108802	37.6051	-6.92851	1.49303	-4.64057	3.47454e-06	0.00251041	RAF1	full-splice_match	alternative_5end
251938	117.367	9.78919	2.12523	4.60618	4.10132e-06	0.00285377	KIAA0930	incomplete-splice_match	3prime_fragment
255779	50.5314	9.06947	1.97217	4.59872	4.25099e-06	0.00285377	EIF4G1	incomplete-splice_match	3prime_fragment
104772	68.5245	-2.81143	0.612494	-4.59013	4.42979e-06	0.00285377	HMGN1	full-splice_match	alternative_5end
74220	74.9206	-6.27182	1.36679	-4.58873	4.45942e-06	0.00285377	BAIAP2	incomplete-splice_match	3prime_fragment
11919	39.3976	-8.16972	1.78753	-4.57039	4.86818e-06	0.00302882	ERI3	incomplete-splice_match	3prime_fragment
57455	89.8739	9.49737	2.08469	4.55577	5.21946e-06	0.00307646	MAP2K1	incomplete-splice_match	3prime_fragment
100553	97.5356	7.87026	1.72742	4.55609	5.21153e-06	0.00307646	ABHD12	full-splice_match	reference_match
125966	7.17251	2.41659	0.533386	4.53066	5.88002e-06	0.00337694	SLC30A5	full-splice_match	alternative_3end5end
251996	52.7727	-6.99677	1.55119	-4.51059	6.4649e-06	0.00362002	SELENOO	incomplete-splice_match	3prime_fragment
159164	27.6086	-7.7017	1.71089	-4.50159	6.74471e-06	0.00368458	MAN1B1	incomplete-splice_match	3prime_fragment
181267	53.7064	-6.94656	1.54516	-4.49569	6.93449e-06	0.00369806	ZNF692	incomplete-splice_match	3prime_fragment
140465	13.4026	5.12545	1.15258	4.44694	8.71005e-06	0.00443381	ICA1	incomplete-splice_match	3prime_fragment
73889	35.9381	-7.65067	1.71925	-4.44999	8.58738e-06	0.00443381	TMEM94	incomplete-splice_match	3prime_fragment
129190	12.1828	5.54743	1.258	4.40974	1.03496e-05	0.00507995	DELE1	full-splice_match	alternative_3end5end
90780	90.8675	5.27577	1.19686	4.408	1.0433e-05	0.00507995	XPO1	incomplete-splice_match	3prime_fragment
32666	30.2975	7.46307	1.69962	4.39103	1.12815e-05	0.00533948	RTN4RL2	incomplete-splice_match	3prime_fragment
262496	5.93602	5.02272	1.14466	4.38794	1.14428e-05	0.00533948	PTPN13	incomplete-splice_match	3prime_fragment
38614	110.706	-6.18197	1.41066	-4.38232	1.17422e-05	0.00536736	WASH8P	incomplete-splice_match	3prime_fragment
80656	70.3348	6.34585	1.45453	4.36281	1.28403e-05	0.00563916	TLE5	full-splice_match	reference_match
172826	68.8134	5.67036	1.29859	4.36654	1.26227e-05	0.00563916	CSDE1	incomplete-splice_match	3prime_fragment
60809	30.107	-7.1292	1.63582	-4.35819	1.31143e-05	0.00564871	AP3B2	incomplete-splice_match	3prime_fragment
126704	10.9284	-5.19993	1.19595	-4.34796	1.37409e-05	0.00569942	PLPP1	incomplete-splice_match	3prime_fragment
345382	48.7136	10.0956	2.32039	4.35082	1.35629e-05	0.00569942	VPS9D1	novel_in_catalog	combination_of_known_junctions,intron_retention
58126	19.9449	6.59188	1.52215	4.33062	1.48687e-05	0.00594695	PDE8A	incomplete-splice_match	3prime_fragment
63747	125.354	4.65913	1.07529	4.33289	1.47164e-05	0.00594695	ROGDI	full-splice_match	alternative_5end
72440	21.9024	-4.6284	1.06986	-4.32616	1.51728e-05	0.00596213	UTP6	full-splice_match	alternative_3end5end
93345	31.785	2.98565	0.692548	4.3111	1.62442e-05	0.00608363	PLEKHB2	full-splice_match	alternative_3end
381667	55.107	-7.14149	1.65681	-4.31039	1.62969e-05	0.00608363	PAPSS1	incomplete-splice_match	3prime_fragment
551916	45.2808	-9.84589	2.28093	-4.31661	1.58445e-05	0.00608363	HID1	incomplete-splice_match	3prime_fragment
121641	372.533	-4.21391	0.978455	-4.3067	1.65712e-05	0.0060846	SPARCL1	incomplete-splice_match	3prime_fragment
240911	47.079	-8.1199	1.88708	-4.30288	1.6859e-05	0.00609046	SMPD4BP	incomplete-splice_match	3prime_fragment
239137	28.3368	8.233	1.92057	4.28675	1.81308e-05	0.00635886	PTCD3	incomplete-splice_match	3prime_fragment
64563	61.3502	2.77303	0.647045	4.28568	1.8218e-05	0.00635886	VKORC1	full-splice_match	reference_match
39008	59.3909	-6.75716	1.57774	-4.28282	1.84537e-05	0.00635886	GPR162	incomplete-splice_match	3prime_fragment
19095	25.1293	-5.29676	1.23837	-4.27721	1.89247e-05	0.00642234	PINK1	incomplete-splice_match	3prime_fragment
164965	8.93757	-4.66498	1.09445	-4.26241	2.02234e-05	0.00669311	GTPBP6	full-splice_match	alternative_3end5end
233821	25.8714	-6.6984	1.5719	-4.26134	2.03202e-05	0.00669311	CIC	full-splice_match	alternative_3end5end
285109	14.2392	6.77075	1.59286	4.2507	2.13107e-05	0.006892	PPP2CB	incomplete-splice_match	3prime_fragment
247109	86.2302	6.53993	1.53942	4.2483	2.15394e-05	0.006892	BCL2L1	full-splice_match	alternative_3end
144935	75.1693	3.41831	0.807499	4.2332	2.30384e-05	0.00726781	FIS1	full-splice_match	alternative_3end
94294	24.6231	5.89849	1.39555	4.22663	2.37217e-05	0.00737942	SSB	novel_in_catalog	combination_of_known_junctions,intron_retention
220279	41.4658	7.51568	1.78189	4.2178	2.46692e-05	0.00756906	RPA1	full-splice_match	alternative_3end5end
35774	23.0527	5.17697	1.23062	4.20681	2.59e-05	0.007633	FTH1	incomplete-splice_match	intron_retention
138968	8.31587	-3.36972	0.800767	-4.20812	2.57505e-05	0.007633	ADAT2	novel_not_in_catalog	novel_exon
156145	69.5144	-6.52136	1.54804	-4.21266	2.52379e-05	0.007633	CTSL	full-splice_match	alternative_3end5end
446845	32.2694	8.42016	2.00697	4.19546	2.72312e-05	0.00792111	PLPPR3	incomplete-splice_match	3prime_fragment
40898	22.8489	-4.44856	1.06301	-4.18488	2.85313e-05	0.00819288	OS9	incomplete-splice_match	internal_fragment
104925	12.5679	-4.61019	1.10293	-4.17995	2.91569e-05	0.00826654	CFAP410	incomplete-splice_match	3prime_fragment
218398	21.0859	7.80999	1.87481	4.16575	3.10337e-05	0.00858139	ARL2BP	incomplete-splice_match	3prime_fragment
298025	31.7545	6.87421	1.64964	4.1671	3.08503e-05	0.00858139	HAUS7	full-splice_match	alternative_3end
88653	44.8533	6.67492	1.60723	4.15307	3.28045e-05	0.00888965	PPM1B	incomplete-splice_match	3prime_fragment
72441	47.7672	4.31588	1.03944	4.15211	3.29423e-05	0.00888965	IFT20	novel_in_catalog	combination_of_known_junctions,intron_retention
80187	57.9517	-5.7456	1.39668	-4.11376	3.89262e-05	0.0103794	SHC2	full-splice_match	alternative_5end
77200	40.718	-4.5342	1.10316	-4.11018	3.95342e-05	0.0104175	CXXC1	full-splice_match	alternative_3end5end
36449	78.5578	-9.91786	2.41739	-4.10271	4.08333e-05	0.0106347	CTSF	incomplete-splice_match	3prime_fragment
159403	26.7659	-4.45825	1.08883	-4.09452	4.23048e-05	0.0108913	PNPLA7	incomplete-splice_match	3prime_fragment
84594	80.9038	7.26864	1.77754	4.08916	4.32946e-05	0.0109065	CA11	incomplete-splice_match	3prime_fragment
86445	12.7285	-7.28879	1.78257	-4.08892	4.33379e-05	0.0109065	KPTN	incomplete-splice_match	3prime_fragment
83558	54.7206	8.12229	1.99207	4.07732	4.55579e-05	0.0110233	FXYD1_FXYD7	fusion	multi-exon
53505	86.0787	7.29615	1.79063	4.07462	4.60896e-05	0.0110233	SRSF5	full-splice_match	reference_match
139675	10.9396	6.42448	1.58071	4.06431	4.81757e-05	0.0110233	DLL1	incomplete-splice_match	3prime_fragment
28197	16.9384	5.84724	1.43603	4.0718	4.66503e-05	0.0110233	GOT1	incomplete-splice_match	3prime_fragment
92084	37.0903	5.3628	1.31953	4.06417	4.82044e-05	0.0110233	SNRNP200	incomplete-splice_match	3prime_fragment
58454	29.6824	-3.12894	0.768086	-4.07368	4.62753e-05	0.0110233	TPM1	full-splice_match	alternative_3end
158192	19.7373	-4.14284	1.01877	-4.06652	4.77207e-05	0.0110233	GARNL3	incomplete-splice_match	3prime_fragment
144088	22.6132	-6.91714	1.70125	-4.06591	4.78448e-05	0.0110233	GUSB	novel_in_catalog	combination_of_known_junctions
145051	35.7396	-7.13149	1.75478	-4.06404	4.82314e-05	0.0110233	RASA4	incomplete-splice_match	3prime_fragment
97320	73.4788	7.86829	1.9391	4.0577	4.95594e-05	0.0112124	CLK1	full-splice_match	alternative_3end
14111	64.4329	-3.29157	0.812617	-4.05058	5.10905e-05	0.0114433	SRP9	full-splice_match	alternative_5end
249495	39.4499	8.71275	2.15754	4.03827	5.38467e-05	0.011887	PFKL	full-splice_match	alternative_5end
154734	103.592	-5.06813	1.25596	-4.03525	5.45437e-05	0.011887	GRHPR	full-splice_match	alternative_3end5end
268769	21.4911	-6.8358	1.69424	-4.03473	5.46641e-05	0.011887	KCNN2	full-splice_match	alternative_3end5end
204742	12.8802	6.65344	1.6513	4.02922	5.59614e-05	0.0120522	RB1	incomplete-splice_match	3prime_fragment
86233	39.1405	-7.04762	1.7522	-4.02216	5.7667e-05	0.0123012	EML2	incomplete-splice_match	3prime_fragment
224449	97.8733	7.38335	1.84646	3.99865	6.37049e-05	0.0125504	GFAP	full-splice_match	alternative_3end
65489	58.0277	5.46551	1.36269	4.01083	6.05058e-05	0.0125504	IST1	full-splice_match	alternative_3end5end
223346	18.4256	5.41045	1.35155	4.00315	6.25052e-05	0.0125504	SEC14L1	incomplete-splice_match	3prime_fragment
265296	11.3787	4.55534	1.1394	3.99801	6.38781e-05	0.0125504	SORBS2	incomplete-splice_match	3prime_fragment
30172	58.004	1.73158	0.432985	3.99916	6.35664e-05	0.0125504	IFITM2	full-splice_match	alternative_5end
82608	14.348	-4.29766	1.07163	-4.01041	6.06143e-05	0.0125504	PTOV1	incomplete-splice_match	intron_retention
250081	17.6248	4.18732	1.04728	3.99827	6.3806e-05	0.0125504	TMEM191C	novel_in_catalog	combination_of_known_junctions,intron_retention
128688	32.0886	3.21825	0.804086	4.00237	6.27102e-05	0.0125504	UBE2B	novel_in_catalog	combination_of_known_splicesites
112393	8.96228	-5.57883	1.39281	-4.00544	6.19017e-05	0.0125504	TBC1D23	incomplete-splice_match	3prime_fragment
135712	14.2794	-5.4202	1.36085	-3.98294	6.80674e-05	0.0132572	SLC35A1	incomplete-splice_match	3prime_fragment
45630	28.8628	-4.77208	1.1988	-3.98072	6.87064e-05	0.0132663	ATP2B1	incomplete-splice_match	3prime_fragment
92259	32.5437	5.40466	1.36024	3.97332	7.08767e-05	0.0133403	CRACDL	incomplete-splice_match	3prime_fragment
71917	16.316	-5.15321	1.29681	-3.97376	7.07474e-05	0.0133403	SLC25A39	incomplete-splice_match	intron_retention
21659	18.995	-6.21564	1.56412	-3.97388	7.07098e-05	0.0133403	DUSP12	full-splice_match	alternative_3end
499774	45.2643	7.92844	2.00237	3.95952	7.51004e-05	0.0135185	NUCB1	full-splice_match	alternative_5end
154179	10.3165	6.33431	1.60098	3.95652	7.60483e-05	0.0135185	PTPRD	incomplete-splice_match	3prime_fragment
43843	14.8703	1.3887	0.350976	3.95669	7.59945e-05	0.0135185	RN7SL737P	full-splice_match	mono-exon
41420	6.85332	-3.65003	0.92135	-3.96161	7.44456e-05	0.0135185	SLC4A8	incomplete-splice_match	3prime_fragment
73144	158.237	4.63914	1.17017	3.9645	7.35489e-05	0.0135185	SEPTIN4	novel_in_catalog	combination_of_known_junctions
538448	11.9803	-6.44657	1.62714	-3.9619	7.43552e-05	0.0135185	CTNND2	incomplete-splice_match	3prime_fragment
209787	9.42965	-6.48707	1.63478	-3.96816	7.24284e-05	0.0135185	SNW1	incomplete-splice_match	3prime_fragment
151956	21.0935	6.94164	1.75914	3.94603	7.94561e-05	0.0139388	KLF10	incomplete-splice_match	3prime_fragment
80819	114.928	6.098	1.54632	3.94356	8.02798e-05	0.0139388	UBXN6	full-splice_match	reference_match
20144	7.27464	-3.27555	0.830391	-3.94458	7.99394e-05	0.0139388	RNF115	incomplete-splice_match	5prime_fragment
21627	11.1121	-4.93201	1.25179	-3.93996	8.1496e-05	0.0140411	SDHC	full-splice_match	alternative_3end
93082	8.55752	4.39886	1.11876	3.93192	8.42697e-05	0.014299	FHL2	full-splice_match	reference_match
127835	8.66761	3.96574	1.00818	3.93355	8.36988e-05	0.014299	MAN2A1	incomplete-splice_match	internal_fragment
321671	20.4957	-7.21832	1.8404	-3.92215	8.77612e-05	0.0147795	ACP2	incomplete-splice_match	3prime_fragment
81502	53.423	-4.07709	1.04002	-3.9202	8.84753e-05	0.0147886	TMEM205	full-splice_match	reference_match
106769	33.5599	-5.76617	1.47321	-3.91403	9.07691e-05	0.0150596	RHBDD3	incomplete-splice_match	3prime_fragment
563936	17.285	7.51996	1.92353	3.90945	9.25058e-05	0.0152349	A2M	incomplete-splice_match	3prime_fragment
80657	67.7073	6.34549	1.62445	3.90623	9.37481e-05	0.0153268	TLE5	incomplete-splice_match	3prime_fragment
41505	29.0185	-4.94228	1.26583	-3.90439	9.44634e-05	0.0153318	TNS2	incomplete-splice_match	3prime_fragment
173185	693.974	-5.46051	1.3995	-3.90175	9.54989e-05	0.0153884	CLSTN1	incomplete-splice_match	3prime_fragment
24080	16.2826	4.11701	1.05641	3.89716	9.73281e-05	0.0155711	COMMD3	full-splice_match	reference_match
81784	43.1742	-7.86548	2.03001	-3.8746	0.0001068	0.0169652	BTBD2	incomplete-splice_match	3prime_fragment
231935	83.009	8.40069	2.17019	3.87095	0.00010841	0.0170998	VSTM2B	novel_not_in_catalog	combination_of_known_splicesites,novel_exon
113801	2603.31	2.94482	0.761474	3.86727	0.000110062	0.017239	CLDND1	full-splice_match	alternative_3end
429939	16.4078	7.00189	1.81484	3.85812	0.000114261	0.0177724	TBRG1	incomplete-splice_match	5prime_fragment
159350	43.6476	-4.54198	1.17872	-3.85332	0.000116528	0.018	DPP7	incomplete-splice_match	3prime_fragment
101250	61.0912	5.18351	1.34916	3.84203	0.000122019	0.018719	SYS1-DBNDD2	full-splice_match	alternative_3end5end
267438	70.2126	6.47128	1.687	3.83596	0.000125073	0.01878	ERBIN	incomplete-splice_match	3prime_fragment
6113	20.6074	5.90421	1.5389	3.83665	0.000124722	0.01878	GALNT9	incomplete-splice_match	3prime_fragment
11360	20.0099	4.59701	1.19809	3.83696	0.000124564	0.01878	SFPQ	incomplete-splice_match	3prime_fragment
71862	19.2434	-5.1838	1.35185	-3.8346	0.00012577	0.01878	HDAC5	incomplete-splice_match	3prime_fragment
220875	9.96521	5.99563	1.56525	3.83047	0.000127897	0.0188538	KCNAB3	incomplete-splice_match	3prime_fragment
28376	17.4988	4.69215	1.22498	3.83038	0.000127948	0.0188538	OGA	incomplete-splice_match	5prime_fragment
172111	8.60967	6.11447	1.59732	3.82795	0.000129216	0.0189162	USP16	incomplete-splice_match	3prime_fragment
102045	17.2224	5.89402	1.54137	3.82388	0.000131366	0.0189828	SERINC3	incomplete-splice_match	3prime_fragment
214021	8.2948	5.36824	1.4037	3.82435	0.000131116	0.0189828	RCN2	novel_not_in_catalog	Alt3
35584	21.1192	-4.49849	1.17709	-3.82169	0.000132538	0.0190294	SSRP1	incomplete-splice_match	3prime_fragment
55675	26.0117	-5.32781	1.39743	-3.81259	0.00013752	0.0196189	DDX24	full-splice_match	alternative_3end5end
120692	14.0491	-2.38498	0.626738	-3.80538	0.000141585	0.020071	COPS4	incomplete-splice_match	5prime_fragment
432699	29.9383	8.31492	2.19183	3.79361	0.000148475	0.0203756	TRAFD1	incomplete-splice_match	3prime_fragment
236653	9.16807	6.16877	1.62574	3.79445	0.000147973	0.0203756	YPEL5	full-splice_match	alternative_3end
74673	28.8137	3.71433	0.979411	3.79241	0.000149192	0.0203756	MRPL38	full-splice_match	alternative_3end5end
59543	43.2212	-5.71261	1.50545	-3.79462	0.000147869	0.0203756	RPL4	incomplete-splice_match	3prime_fragment
80898	25.5825	-5.84865	1.54134	-3.79452	0.000147928	0.0203756	SAFB2	incomplete-splice_match	3prime_fragment
402930	65.2512	-6.92789	1.82676	-3.79245	0.000149167	0.0203756	DUSP26	incomplete-splice_match	3prime_fragment
289299	20.9631	5.69165	1.50282	3.78732	0.00015228	0.0206714	UBAP1	incomplete-splice_match	3prime_fragment
11303	48.4492	6.82562	1.80521	3.78107	0.000156156	0.0210697	PHC2	full-splice_match	alternative_5end
42593	27.8296	-8.42243	2.22911	-3.77838	0.000157855	0.0211714	CNPY2_PAN2	full-splice_match	alternative_3end5end
65721	7.13771	5.80383	1.54029	3.76801	0.000164552	0.0219383	WWOX	incomplete-splice_match	3prime_fragment
33849	12.1426	1.59858	0.425828	3.75406	0.000173995	0.02306	ENSG00000290057	full-splice_match	mono-exon
180768	11.4486	-6.7662	1.80422	-3.75021	0.000176685	0.0232787	EFCAB7	incomplete-splice_match	3prime_fragment
345284	26.5158	-8.35084	2.22962	-3.74542	0.000180095	0.0235893	AFG3L1P	incomplete-splice_match	3prime_fragment
418207	12.0779	6.55707	1.75226	3.74206	0.000182515	0.0236869	UBE4B	incomplete-splice_match	3prime_fragment
98111	14.3417	-3.55144	0.949213	-3.74146	0.000182955	0.0236869	EPHA4	incomplete-splice_match	3prime_fragment
60246	22.4998	3.76132	1.00617	3.73826	0.000185297	0.0238522	ANP32A	incomplete-splice_match	3prime_fragment
54157	18.9111	5.09611	1.36744	3.72675	0.000193968	0.0248257	MAX	full-splice_match	alternative_3end
227484	8.16903	3.9396	1.05942	3.71863	0.000200304	0.0254909	OSBPL1A	incomplete-splice_match	3prime_fragment
122049	10.4146	4.57066	1.23095	3.71313	0.000204712	0.0256597	BDH2	novel_in_catalog	combination_of_known_splicesites
17502	16.7613	-4.85747	1.30803	-3.71357	0.000204354	0.0256597	PHTF1	incomplete-splice_match	3prime_fragment
400729	7.7511	-5.38555	1.45097	-3.71168	0.000205886	0.0256597	BPGM	incomplete-splice_match	3prime_fragment
293465	66.201	-7.2616	1.95663	-3.71128	0.000206212	0.0256597	OLFM1	full-splice_match	alternative_3end5end
44716	58.0266	-4.18053	1.12803	-3.70604	0.000210524	0.0260515	DYNLL1	full-splice_match	alternative_3end5end
7933	32.9398	3.96197	1.06992	3.70304	0.000213032	0.0260622	IVNS1ABP	full-splice_match	alternative_3end5end
104064	6.44396	-1.56682	0.423085	-3.70331	0.000212801	0.0260622	NDUFV3	novel_not_in_catalog	Alt5
84364	12.1409	-4.62624	1.24974	-3.70177	0.000214101	0.0260622	TMEM91	full-splice_match	alternative_5end
108491	40.3205	5.84943	1.58267	3.69592	0.000219094	0.0263832	ITPR1	full-splice_match	alternative_3end5end
84831	11.9389	-3.73172	1.00953	-3.69651	0.000218587	0.0263832	ASPDH	novel_in_catalog	combination_of_known_splicesites
93220	15.7213	6.50069	1.75964	3.69433	0.000220465	0.0264063	GPR17	full-splice_match	alternative_3end
159775	8.78332	-4.87925	1.32247	-3.6895	0.000224695	0.0266281	DPM2	incomplete-splice_match	3prime_fragment
132281	98.344	-7.43005	2.0137	-3.68976	0.000224469	0.0266281	BASP1	novel_not_in_catalog	novel_exon
146957	38.5228	-4.97637	1.3495	-3.68757	0.000226406	0.0266897	AKR1B1	incomplete-splice_match	intron_retention
293799	13.4018	-4.23738	1.14953	-3.68619	0.000227638	0.0266945	ANAPC2	full-splice_match	alternative_5end
70247	79.2065	-1.95009	0.530014	-3.67932	0.000233855	0.0272807	DYNLL2	full-splice_match	alternative_3end5end
19231	8.91087	6.10038	1.66064	3.6735	0.000239247	0.027765	GPR89B	full-splice_match	alternative_5end
153254	8.43743	-5.56975	1.51778	-3.66967	0.000242862	0.0280393	MFSD3	novel_in_catalog	combination_of_known_junctions,intron_retention
247537	20.0141	7.73361	2.11902	3.64962	0.000262626	0.0301656	CDH22	incomplete-splice_match	3prime_fragment
139481	12.2832	5.70655	1.56837	3.63852	0.000274205	0.0313349	PRR18	full-splice_match	alternative_3end5end
189739	59.5955	7.47631	2.05606	3.63623	0.000276657	0.0314547	FGFR2	incomplete-splice_match	3prime_fragment
549154	31.0802	-8.21027	2.26276	-3.62843	0.000285153	0.0322568	ANKS1B	incomplete-splice_match	3prime_fragment
513875	63.7335	8.82765	2.43632	3.62335	0.000290808	0.0323475	DPP6	incomplete-splice_match	3prime_fragment
164773	49.7629	4.22609	1.16554	3.62585	0.000288012	0.0323475	PNCK	full-splice_match	alternative_5end
135274	11.2997	-2.40743	0.66457	-3.62253	0.000291731	0.0323475	KIAA1586	full-splice_match	alternative_3end5end
10850	10.6842	-3.05717	0.843664	-3.62368	0.000290438	0.0323475	FAM229A	full-splice_match	alternative_5end
76789	21.1328	-5.8629	1.61937	-3.62048	0.000294056	0.0324447	CELF4	incomplete-splice_match	3prime_fragment
127986	63.4326	2.0082	0.555297	3.61645	0.000298675	0.0327928	AP3S1	full-splice_match	alternative_5end
150148	9.95613	5.586	1.54561	3.6141	0.000301395	0.03293	ATP6V1H	incomplete-splice_match	3prime_fragment
135798	16.0552	5.51122	1.52795	3.60695	0.00030982	0.0333745	DOP1A	incomplete-splice_match	3prime_fragment
53072	24.3942	3.85433	1.0685	3.60723	0.000309482	0.0333745	PPM1A	incomplete-splice_match	3prime_fragment
141457	21.4359	-3.53604	0.980366	-3.60685	0.000309934	0.0333745	CCT6A	full-splice_match	alternative_5end
235433	13.618	5.84287	1.62529	3.59497	0.000324435	0.0346818	SH3YL1	novel_in_catalog	combination_of_known_junctions
544061	25.7215	-7.54073	2.09792	-3.59438	0.000325171	0.0346818	PTGES2	incomplete-splice_match	3prime_fragment
136557	93.6807	5.81407	1.61954	3.58995	0.000330743	0.03497	DST	full-splice_match	alternative_3end5end
100224	10.2234	-6.06407	1.68927	-3.58975	0.000330996	0.03497	ESF1	incomplete-splice_match	3prime_fragment
187217	33.1629	7.37958	2.05781	3.58612	0.000335629	0.0351594	GOLGA7B	novel_not_in_catalog	Alt3
69517	44.0578	-6.54932	1.82641	-3.58589	0.000335927	0.0351594	SREBF1	incomplete-splice_match	3prime_fragment
134831	6.03194	3.85992	1.08009	3.5737	0.000351975	0.0366676	OARD1	full-splice_match	alternative_3end5end
111188	31.0349	-6.99821	1.963	-3.56507	0.000363763	0.0377202	ACAA1	novel_in_catalog	combination_of_known_junctions,intron_retention
101732	18.7087	5.06288	1.42167	3.56121	0.000369144	0.037896	TRPC4AP	incomplete-splice_match	3prime_fragment
131764	37.653	-2.91471	0.818612	-3.56055	0.000370072	0.037896	FAM193B	full-splice_match	alternative_5end
121645	44.1443	-4.61179	1.29536	-3.56023	0.000370534	0.037896	SPARCL1	incomplete-splice_match	3prime_fragment
81464	72.8945	3.41114	0.96139	3.54813	0.000387978	0.0390872	CDKN2D	full-splice_match	alternative_3end
132288	6.1249	-2.03402	0.573015	-3.54968	0.000385695	0.0390872	LINC02217	full-splice_match	alternative_5end
22330	26.543	4.62917	1.30497	3.54733	0.000389162	0.0390872	IGSF8	novel_in_catalog	combination_of_known_junctions,intron_retention
61762	26.6309	-3.78231	1.06604	-3.54801	0.000388147	0.0390872	RAB26	full-splice_match	reference_match
85585	11.7128	4.70478	1.32742	3.54431	0.000393645	0.039186	ZNF529	novel_not_in_catalog	Alt3
54592	15.2342	-2.37106	0.66882	-3.54514	0.000392409	0.039186	SPTLC2	incomplete-splice_match	5prime_fragment
50592	37.0417	3.86817	1.09215	3.54178	0.000397432	0.039388	UPF3A	incomplete-splice_match	3prime_fragment
108209	94.1372	6.33867	1.79587	3.52958	0.000416214	0.0410677	SYN2	incomplete-splice_match	internal_fragment
350001	16.1678	5.23216	1.48368	3.52648	0.000421126	0.0413701	GRB2	incomplete-splice_match	3prime_fragment
468335	47.0569	8.96579	2.54868	3.51782	0.000435104	0.0415911	TOMM6_PRICKLE4	full-splice_match	alternative_5end
287983	180.746	8.0055	2.27405	3.52036	0.000430954	0.0415911	NDRG1	full-splice_match	reference_match
248040	10.1391	6.75773	1.92374	3.51282	0.000443383	0.0415911	MRGBP	novel_not_in_catalog	partial_intron_retention
64613	13.1929	4.93883	1.4022	3.52219	0.000427995	0.0415911	EIF3CL	incomplete-splice_match	3prime_fragment
1999	17.8076	4.0256	1.14409	3.51862	0.000433805	0.0415911	WASH8P	incomplete-splice_match	3prime_fragment
123147	20.2698	3.87839	1.10362	3.51424	0.000441017	0.0415911	GRIA2	incomplete-splice_match	intron_retention
95675	34.6075	3.57018	1.01672	3.51146	0.000445659	0.0415911	CHN1	incomplete-splice_match	3prime_fragment
181867	7.08301	5.77893	1.6454	3.51218	0.000444446	0.0415911	VWA1	novel_in_catalog	combination_of_known_splicesites
52332	24.7333	-3.73545	1.06107	-3.52045	0.000430817	0.0415911	FKBP3	incomplete-splice_match	3prime_fragment
113618	9.49804	-3.89739	1.10815	-3.51704	0.000436393	0.0415911	HMCES	incomplete-splice_match	3prime_fragment
298014	17.319	-4.03573	1.14788	-3.51581	0.00043841	0.0415911	HAUS7	incomplete-splice_match	3prime_fragment
538156	28.5609	-6.96984	1.98423	-3.51262	0.000443718	0.0415911	GRIA2	incomplete-splice_match	intron_retention
82421	138.337	4.68936	1.33714	3.507	0.000453188	0.0421183	SNRNP70	full-splice_match	reference_match
19094	35.9997	5.72598	1.6345	3.5032	0.000459709	0.0425478	PINK1	incomplete-splice_match	3prime_fragment
499379	144.478	-8.05833	2.30274	-3.49945	0.000466213	0.0429722	EEF2	incomplete-splice_match	3prime_fragment
113545	6.86623	-2.3552	0.674168	-3.4935	0.000476735	0.0435834	ENSG00000288769	full-splice_match	mono-exon
397418	41.955	-7.09151	2.02936	-3.49446	0.000475016	0.0435834	AMPH	incomplete-splice_match	3prime_fragment
166734	5.74482	5.9441	1.70619	3.48384	0.000494268	0.0446396	VARS1	incomplete-splice_match	3prime_fragment
223383	10.9413	5.75187	1.65079	3.48431	0.000493405	0.0446396	SYNGR2	full-splice_match	alternative_3end
122072	12.997	-4.41606	1.26743	-3.48427	0.000493488	0.0446396	PPA2	full-splice_match	alternative_3end5end
194336	12.1267	7.00942	2.01546	3.47783	0.000505485	0.045107	LTBP3	incomplete-splice_match	3prime_fragment
73137	125.183	-3.60119	1.03525	-3.47856	0.000504109	0.045107	SEPTIN4	full-splice_match	alternative_3end
117922	9.30482	-4.17184	1.19926	-3.47867	0.000503901	0.045107	ENSG00000283183	incomplete-splice_match	3prime_fragment
280544	17.291	7.06392	2.0344	3.47224	0.000516127	0.0458738	NPTX2	incomplete-splice_match	3prime_fragment
404584	17.7928	7.17407	2.06787	3.4693	0.000521807	0.0460135	PABPC1	full-splice_match	alternative_3end5end
104710	25.6122	3.19511	0.920704	3.47029	0.000519889	0.0460135	ENSG00000289404	full-splice_match	mono-exon
18710	8.8717	-4.43313	1.27936	-3.46511	0.000530019	0.0463725	KIF1B	incomplete-splice_match	3prime_fragment
225773	54.2401	-7.15273	2.06398	-3.4655	0.000529245	0.0463725	TSPOAP1	incomplete-splice_match	intron_retention
242937	23.8158	5.23661	1.5143	3.45811	0.000543988	0.0472353	ATF2	incomplete-splice_match	3prime_fragment
341846	52.3109	4.96261	1.43509	3.45805	0.000544098	0.0472353	PIGQ	full-splice_match	mono-exon
30352	6.95768	5.76368	1.6682	3.45504	0.00055021	0.0473985	AMPD3	incomplete-splice_match	3prime_fragment
538377	77.8473	-9.09707	2.63222	-3.45605	0.000548149	0.0473985	ADCY2	incomplete-splice_match	3prime_fragment
29663	5.96953	-1.68437	0.487901	-3.45228	0.000555874	0.0477029	EDRF1-DT	full-splice_match	reference_match
513417	19.0422	6.67587	1.9371	3.44633	0.000568261	0.0483951	GUSB	full-splice_match	alternative_5end
45671	44.9171	-0.940784	0.272901	-3.44735	0.000566122	0.0483951	ATP2B1	incomplete-splice_match	5prime_fragment
229699	21.3957	3.89089	1.12977	3.44397	0.000573248	0.0486349	ZNF358	full-splice_match	alternative_3end
149197	106.959	3.41987	0.993328	3.44285	0.000575627	0.0486524	PPP2CB	incomplete-splice_match	3prime_fragment
478685	69.643	8.30463	2.41704	3.43587	0.000590653	0.0488171	GRIN1	incomplete-splice_match	3prime_fragment
74152	22.3878	6.50747	1.89318	3.43733	0.000587483	0.0488171	SLC26A11	incomplete-splice_match	3prime_fragment
233386	5.19406	5.76979	1.67859	3.43729	0.000587561	0.0488171	WDR62	incomplete-splice_match	3prime_fragment
153469	9.58069	5.64511	1.64256	3.43677	0.0005887	0.0488171	CPSF1	incomplete-splice_match	3prime_fragment
23263	38.2313	5.19407	1.50981	3.44022	0.00058125	0.0488171	GLUL	full-splice_match	alternative_3end
56974	51.9716	-3.79085	1.10251	-3.43836	0.000585239	0.0488171	CAPN3	full-splice_match	reference_match
46735	49.9987	-3.52486	1.02673	-3.43308	0.000596757	0.0491403	ANAPC5	full-splice_match	alternative_3end5end
25572	13.5332	5.59091	1.62957	3.4309	0.000601572	0.0493553	HNRNPH3	novel_in_catalog	combination_of_known_junctions
86453	22.5134	4.65097	1.35846	3.42372	0.000617701	0.0504937	ENSG00000279861	full-splice_match	mono-exon
274159	7.89823	3.61541	1.05865	3.41511	0.00063757	0.051743	PHF3	incomplete-splice_match	3prime_fragment
469373	21.7599	-6.27135	1.83636	-3.41509	0.000637605	0.051743	FIG4	incomplete-splice_match	3prime_fragment
152358	19.375	-5.54905	1.62832	-3.40783	0.000654816	0.0529479	SQLE	incomplete-splice_match	3prime_fragment
186051	37.4614	7.70239	2.26698	3.39764	0.0006797	0.0543712	ITGB1	incomplete-splice_match	3prime_fragment
314433	23.9252	6.53417	1.9225	3.39878	0.000676865	0.0543712	CNN3	incomplete-splice_match	3prime_fragment
541170	8.80319	-6.38348	1.87836	-3.39844	0.000677712	0.0543712	PTPN12	incomplete-splice_match	3prime_fragment
157149	23.3216	-5.54838	1.6349	-3.3937	0.000689547	0.0549625	HNRNPK	novel_not_in_catalog	partial_intron_retention
120448	13.5263	-7.38127	2.17794	-3.3891	0.000701216	0.0556945	SEC24B	incomplete-splice_match	3prime_fragment
263558	31.1706	8.37299	2.47141	3.38793	0.000704214	0.0557349	PAPSS1	incomplete-splice_match	3prime_fragment
104050	17.6836	7.10746	2.0996	3.38515	0.000711395	0.0557623	ABCG1	incomplete-splice_match	3prime_fragment
57533	10.6396	5.78472	1.7089	3.38505	0.000711645	0.0557623	PIAS1	incomplete-splice_match	3prime_fragment
231717	9.76406	4.38578	1.29569	3.38491	0.000712029	0.0557623	ECSIT	full-splice_match	alternative_3end5end
79320	60.2911	7.29595	2.15681	3.38275	0.000717643	0.0559142	HNRNPM	novel_not_in_catalog	partial_intron_retention
267446	38.8344	4.75174	1.40491	3.38224	0.000718961	0.0559142	ERBIN	incomplete-splice_match	3prime_fragment
419953	22.2303	7.8855	2.33455	3.37774	0.00073083	0.0562513	VPS45	incomplete-splice_match	3prime_fragment
29323	19.778	-2.23915	0.662808	-3.37827	0.000729434	0.0562513	FAM204A	full-splice_match	alternative_3end
16721	11.8374	-4.13644	1.22435	-3.37848	0.000728886	0.0562513	DPH5	full-splice_match	alternative_3end
59300	8.70758	4.31831	1.27938	3.37531	0.000737326	0.056557	NDUFAF1	full-splice_match	reference_match
65248	7.36719	1.66646	0.494225	3.37187	0.0007466	0.0568787	CKLF	novel_in_catalog	combination_of_known_junctions
297108	10.8036	-4.00108	1.18653	-3.37209	0.000745994	0.0568787	STAG2	incomplete-splice_match	3prime_fragment
301817	14.8478	6.91184	2.05108	3.36985	0.000752094	0.0571031	MBOAT7	full-splice_match	alternative_5end
60856	14.5911	4.50632	1.33808	3.36775	0.000757854	0.0571529	BTBD1	incomplete-splice_match	3prime_fragment
81503	98.1065	-2.67737	0.794907	-3.36815	0.000756734	0.0571529	TMEM205	full-splice_match	reference_match
268825	9.99515	5.70361	1.69476	3.36543	0.000764245	0.0574414	SRP19	novel_in_catalog	combination_of_known_junctions
259631	9.44384	6.6504	1.97843	3.36145	0.000775344	0.0575396	TASOR	incomplete-splice_match	3prime_fragment
35993	8.39321	4.72471	1.40634	3.35957	0.000780637	0.0575396	SNHG1	full-splice_match	reference_match
62759	13.5213	3.6316	1.07986	3.36304	0.000770888	0.0575396	NME4	full-splice_match	reference_match
3526	18.5152	-4.92798	1.46665	-3.36003	0.000779348	0.0575396	PRPF8	incomplete-splice_match	3prime_fragment
147372	23.8777	-5.26507	1.56562	-3.36293	0.000771199	0.0575396	DYNC2I1	incomplete-splice_match	internal_fragment
66990	9.4296	-6.09439	1.8141	-3.35945	0.000780964	0.0575396	GLG1	full-splice_match	alternative_3end5end
279638	7.79293	5.12806	1.52774	3.35663	0.000788973	0.0577497	PSPH	incomplete-splice_match	3prime_fragment
59778	6.45264	-2.42993	0.723858	-3.35691	0.000788176	0.0577497	SHC4	incomplete-splice_match	3prime_fragment
161915	162.514	7.53007	2.25179	3.34403	0.000825694	0.059897	SYP	full-splice_match	reference_match
191384	66.816	5.37299	1.60684	3.34382	0.000826331	0.059897	DKK3	incomplete-splice_match	3prime_fragment
63488	52.935	-6.14311	1.83668	-3.34468	0.000823777	0.059897	RNPS1	full-splice_match	alternative_5end
422457	19.4572	6.70051	2.00639	3.33959	0.000839032	0.0606179	PTCH2	incomplete-splice_match	internal_fragment
88323	9.67505	-6.51723	1.95202	-3.33871	0.00084169	0.0606179	PPM1G	incomplete-splice_match	3prime_fragment
47371	10.808	-3.89189	1.16665	-3.33595	0.000850099	0.0610273	GTF3A	full-splice_match	alternative_5end
67369	9.48916	-5.59859	1.67957	-3.33334	0.000858086	0.0614039	VPS9D1	incomplete-splice_match	5prime_fragment
157940	133.995	2.19644	0.659556	3.33018	0.000867901	0.0619084	SSNA1	full-splice_match	reference_match
31930	17.198	-3.74056	1.12401	-3.32786	0.000875169	0.0622287	DENND5A	incomplete-splice_match	3prime_fragment
153197	8.157	4.90211	1.47417	3.32532	0.000883158	0.062598	MAF1	incomplete-splice_match	intron_retention
146305	6.65011	2.41034	0.725534	3.32217	0.000893217	0.0629177	ENSG00000272941	full-splice_match	mono-exon
271972	8.70251	-5.2706	1.58651	-3.32214	0.000893286	0.0629177	GMDS	incomplete-splice_match	3prime_fragment
26795	23.5976	3.67188	1.10626	3.3192	0.000902772	0.0633865	VSIR	incomplete-splice_match	5prime_fragment
16890	23.6363	7.52	2.27353	3.30762	0.000940908	0.065574	STRIP1	incomplete-splice_match	3prime_fragment
275959	17.0864	7.50706	2.27034	3.30658	0.00094441	0.065574	SERINC1	incomplete-splice_match	3prime_fragment
156940	15.9859	6.34131	1.91787	3.30644	0.000944897	0.065574	RAD23B	incomplete-splice_match	3prime_fragment
147901	8.76015	5.18151	1.5672	3.30622	0.000945638	0.065574	MICU3	incomplete-splice_match	3prime_fragment
8723	17.1785	5.00212	1.51342	3.30518	0.000949146	0.0656141	CYP4X1	incomplete-splice_match	3prime_fragment
551059	10.2125	-6.97512	2.11152	-3.30336	0.000955331	0.0658385	NUP93	incomplete-splice_match	3prime_fragment
141782	151.393	2.03085	0.615131	3.30149	0.00096172	0.0660755	HNRNPA2B1	incomplete-splice_match	3prime_fragment
136060	8.21493	5.12155	1.55281	3.29825	0.000972899	0.0662241	NCOA7	incomplete-splice_match	3prime_fragment
256630	7.56499	4.64192	1.40764	3.29765	0.00097496	0.0662241	ACAP2	incomplete-splice_match	3prime_fragment
80920	20.6274	-2.35609	0.714521	-3.29744	0.00097571	0.0662241	MICOS13	full-splice_match	reference_match
148386	7.98228	-5.28519	1.60171	-3.29971	0.000967839	0.0662241	UBXN8	full-splice_match	reference_match
185136	24.5645	6.46904	1.96398	3.29385	0.000988259	0.0668732	SEC61A2	incomplete-splice_match	3prime_fragment
31588	23.1964	-3.72822	1.13238	-3.29236	0.000993492	0.0670248	RNH1	full-splice_match	reference_match
259493	42.976	7.53774	2.2912	3.28987	0.00100233	0.067173	PXK	novel_not_in_catalog	Alt3
253840	7.84585	4.6903	1.42604	3.28904	0.0010053	0.067173	NAA50	full-splice_match	alternative_3end
66037	15.4026	2.04677	0.622426	3.28837	0.00100768	0.067173	DEF8	full-splice_match	reference_match
90271	7.37213	-4.08294	1.24153	-3.28865	0.00100671	0.067173	VPS54	incomplete-splice_match	3prime_fragment
93581	8.62302	4.82581	1.47032	3.28216	0.00103016	0.0682675	EPC2	incomplete-splice_match	3prime_fragment
21397	9.66286	3.27839	0.998856	3.28215	0.0010302	0.0682675	TMEM240	incomplete-splice_match	3prime_fragment
56102	20.4216	-4.27701	1.30386	-3.28026	0.00103712	0.0685236	CRIP2	full-splice_match	alternative_5end
487986	8.51787	6.04505	1.84571	3.27519	0.00105592	0.0687689	USP47	full-splice_match	alternative_3end5end
413323	11.9642	4.99611	1.52577	3.27448	0.00105857	0.0687689	SMARCA1	incomplete-splice_match	3prime_fragment
106209	12.1502	3.6528	1.1149	3.27635	0.00105159	0.0687689	SERHL2	incomplete-splice_match	3prime_fragment
52064	35.7069	-3.12972	0.955845	-3.2743	0.00105926	0.0687689	CFL2	full-splice_match	alternative_5end
333830	5.64562	-5.33528	1.62871	-3.27576	0.00105377	0.0687689	DZIP1	incomplete-splice_match	3prime_fragment
91982	14.6392	-6.31691	1.92871	-3.27519	0.0010559	0.0687689	IMMT	incomplete-splice_match	3prime_fragment
156117	13.3298	-4.79753	1.46645	-3.27152	0.0010697	0.069246	NTRK2	incomplete-splice_match	3prime_fragment
219946	6.85484	5.78619	1.7703	3.26848	0.00108126	0.0697697	ZCCHC14	incomplete-splice_match	3prime_fragment
343959	10.7166	4.76423	1.45827	3.26704	0.00108679	0.0697697	COQ9	full-splice_match	alternative_5end
114358	12.6842	-2.6927	0.824363	-3.2664	0.00108924	0.0697697	RUVBL1	full-splice_match	mono-exon
449189	23.8002	-6.04916	1.85208	-3.26614	0.00109025	0.0697697	DDX1	incomplete-splice_match	3prime_fragment
477127	18.2502	7.14885	2.18965	3.26483	0.00109529	0.0698923	AGTPBP1	incomplete-splice_match	3prime_fragment
1091	5.76737	-5.75799	1.76451	-3.26323	0.00110149	0.0700887	WDR46	incomplete-splice_match	3prime_fragment
78460	12.3592	-3.15493	0.967244	-3.26178	0.00110716	0.0702501	RFXANK	novel_in_catalog	combination_of_known_junctions
123093	5.783	-1.67485	0.513837	-3.25949	0.00111611	0.0706175	GRIA2	incomplete-splice_match	3prime_fragment
194944	34.9723	7.78985	2.39129	3.25759	0.00112364	0.070894	PDE2A	full-splice_match	alternative_5end
128987	6.7115	-4.53562	1.39356	-3.2547	0.00113514	0.0714181	UBE2D2	incomplete-splice_match	3prime_fragment
5444	40.6723	2.62047	0.806153	3.25059	0.00115168	0.071853	VPS28	full-splice_match	alternative_3end
107632	9.27131	5.26393	1.61886	3.25163	0.00114747	0.071853	PIM3	novel_in_catalog	combination_of_known_junctions,intron_retention
347521	16.8112	-6.18761	1.90314	-3.25126	0.00114894	0.071853	LUC7L3	incomplete-splice_match	3prime_fragment
166195	12.3158	-3.56709	1.09933	-3.2448	0.00117535	0.0731261	DDX39B	full-splice_match	alternative_5end
219329	5.25325	4.03916	1.24532	3.24346	0.00118086	0.0731821	ENKD1	full-splice_match	alternative_3end5end
120625	6.59214	-3.14869	0.970917	-3.243	0.00118278	0.0731821	MRPL1	incomplete-splice_match	3prime_fragment
296829	5.29976	4.33956	1.3393	3.24017	0.00119458	0.0737088	PLS3	incomplete-splice_match	3prime_fragment
130767	26.1164	4.28353	1.32249	3.23898	0.00119957	0.0738131	GABRG2	incomplete-splice_match	3prime_fragment
49868	19.5984	6.90434	2.13389	3.23557	0.00121401	0.0742933	IPO5	incomplete-splice_match	3prime_fragment
247074	14.6418	5.31754	1.64323	3.23604	0.00121201	0.0742933	TTI1	incomplete-splice_match	3prime_fragment
130380	15.4063	-4.8307	1.49404	-3.23331	0.00122364	0.0746785	LARS1	incomplete-splice_match	3prime_fragment
156094	6.55397	-6.34204	1.96402	-3.22911	0.00124178	0.0755796	NTRK2	full-splice_match	alternative_3end5end
177844	19.9613	7.73009	2.39529	3.2272	0.00125009	0.0758796	SFPQ	incomplete-splice_match	3prime_fragment
263096	5.81859	4.11284	1.27541	3.22473	0.00126091	0.0761237	EIF4E	incomplete-splice_match	3prime_fragment
63465	5.91755	4.88683	1.51514	3.22532	0.00125831	0.0761237	BRICD5	novel_in_catalog	combination_of_known_junctions,intron_retention
8554	12.8086	3.87684	1.20347	3.22139	0.00127572	0.0766047	SRSF4	full-splice_match	alternative_3end5end
71617	9.17273	-6.82646	2.11891	-3.22169	0.00127437	0.0766047	CNTNAP1	incomplete-splice_match	3prime_fragment
28364	80.1193	-4.18263	1.30091	-3.21515	0.00130377	0.0780795	OGA	full-splice_match	alternative_3end5end
193539	16.4418	7.45133	2.32124	3.21006	0.00132708	0.0792255	SART1	full-splice_match	alternative_3end
110502	10.5334	-3.95624	1.23269	-3.20943	0.00132998	0.0792255	TAFA1	full-splice_match	alternative_3end
93311	8.34839	4.21543	1.31445	3.20699	0.00134132	0.0796894	PTPN18	incomplete-splice_match	5prime_fragment
110095	14.3491	-3.73744	1.16604	-3.20524	0.00134948	0.0797512	ENSG00000280173	full-splice_match	mono-exon
64144	61.7386	-4.81203	1.50105	-3.20577	0.001347	0.0797512	LUC7L	full-splice_match	reference_match
157372	11.1824	-4.9921	1.55865	-3.20283	0.00136085	0.0802115	ASTN2	incomplete-splice_match	3prime_fragment
31899	20.2059	6.31989	1.97411	3.20138	0.00136769	0.0804028	COPB1	incomplete-splice_match	3prime_fragment
6125	9.73283	4.92867	1.54037	3.19966	0.00137588	0.0806726	CLSTN3	incomplete-splice_match	3prime_fragment
80713	12.7703	4.32862	1.35385	3.19728	0.00138732	0.0811313	RNF126	incomplete-splice_match	3prime_fragment
338021	36.6335	-4.80632	1.50664	-3.1901	0.00142223	0.0829559	APBA2	incomplete-splice_match	3prime_fragment
90764	9.33744	-3.98237	1.24909	-3.18821	0.00143158	0.0832847	NRXN1	incomplete-splice_match	3prime_fragment
158326	117.024	6.3981	2.0107	3.18203	0.00146245	0.0840438	GSN	full-splice_match	reference_match
67505	6.68218	4.69616	1.47463	3.18463	0.00144939	0.0840438	PAFAH1B1	incomplete-splice_match	3prime_fragment
177937	7.24186	4.6919	1.47536	3.18017	0.00147188	0.0840438	SNIP1	full-splice_match	alternative_3end5end
17645	8.31259	4.58547	1.44228	3.17932	0.00147623	0.0840438	SORT1	incomplete-splice_match	3prime_fragment
139527	9.96538	3.7206	1.16883	3.18317	0.00145671	0.0840438	MPC1	incomplete-splice_match	3prime_fragment
240854	8.51702	3.61461	1.13686	3.17948	0.0014754	0.0840438	BIN1	full-splice_match	alternative_3end5end
69046	63.249	2.57329	0.80968	3.17815	0.00148216	0.0840438	TRAPPC1	full-splice_match	reference_match
498968	19.9756	7.73101	2.43235	3.17842	0.00148082	0.0840438	TGFBR3L	novel_in_catalog	combination_of_known_junctions,intron_retention
430181	29.8695	-5.84776	1.83741	-3.18261	0.00145956	0.0840438	GALNT8	novel_not_in_catalog	partial_intron_retention
64477	25.6905	-5.89111	1.85313	-3.17901	0.00147781	0.0840438	TBC1D10B	full-splice_match	alternative_3end5end
74800	12.0805	-3.56646	1.12291	-3.17608	0.00149279	0.0844329	TMC6	full-splice_match	alternative_5end
236471	32.2006	-6.45834	2.03507	-3.17352	0.00150602	0.0849666	HADHA	incomplete-splice_match	3prime_fragment
160821	23.9093	3.28519	1.03552	3.17249	0.00151136	0.0850537	GPM6B	novel_in_catalog	combination_of_known_junctions
283897	6.76181	5.43843	1.71708	3.16726	0.00153885	0.0855266	ESYT2	incomplete-splice_match	3prime_fragment
63837	13.985	2.07889	0.656119	3.16847	0.00153241	0.0855266	METTL26	full-splice_match	reference_match
15541	5.93838	-1.88979	0.596581	-3.1677	0.00153649	0.0855266	LYST	incomplete-splice_match	3prime_fragment
39973	19.0984	-3.15875	0.996599	-3.16953	0.00152686	0.0855266	PHB2	novel_not_in_catalog	partial_intron_retention
302250	5.28977	-6.02605	1.90239	-3.16763	0.00153689	0.0855266	SHANK3	novel_not_in_catalog	Alt3
238069	7.31487	5.17874	1.63571	3.16605	0.00154524	0.0856693	HTRA2	full-splice_match	alternative_3end
41751	25.1703	-3.2474	1.026	-3.16509	0.00155034	0.0857394	KIF21A	incomplete-splice_match	3prime_fragment
97737	21.3852	-3.08787	0.975959	-3.16393	0.00155652	0.0858695	PNKD	novel_not_in_catalog	Alt3
34621	5.24004	-1.49573	0.472854	-3.16319	0.00156048	0.0858763	ELMOD1	incomplete-splice_match	5prime_fragment
464968	14.2649	7.24679	2.29361	3.15956	0.00158008	0.0863185	MTREX	incomplete-splice_match	3prime_fragment
375871	9.1264	5.88589	1.86286	3.1596	0.00157985	0.0863185	CSPG5	incomplete-splice_match	3prime_fragment
97170	40.3801	-3.7288	1.17993	-3.16018	0.00157671	0.0863185	SF3B1	full-splice_match	alternative_3end5end
248043	9.69933	5.41469	1.71482	3.15759	0.00159082	0.0866938	OGFR	full-splice_match	alternative_3end
51155	11.1381	4.29546	1.3629	3.1517	0.00162323	0.0878193	SLC22A17	incomplete-splice_match	3prime_fragment
99020	7.49898	-4.30489	1.36564	-3.15229	0.00161993	0.0878193	DOCK10	incomplete-splice_match	3prime_fragment
18602	13.4384	-5.21363	1.65376	-3.15259	0.00161828	0.0878193	CPTP	full-splice_match	alternative_3end
269555	11.5482	6.23767	1.98062	3.14934	0.00163638	0.0881104	ANKHD1	incomplete-splice_match	internal_fragment
115108	13.3167	3.04525	0.966952	3.14932	0.00163648	0.0881104	RNF13	full-splice_match	alternative_3end
297686	37.8886	-5.50603	1.75148	-3.14365	0.00166854	0.0896209	SLC6A8	incomplete-splice_match	3prime_fragment
9190	80.3438	4.92298	1.56715	3.14135	0.00168169	0.0901112	DNAJC6	incomplete-splice_match	3prime_fragment
28046	20.4321	-3.37311	1.07458	-3.139	0.00169523	0.090404	OPALIN	full-splice_match	alternative_3end5end
109645	7.32618	-4.43186	1.41161	-3.13958	0.00169191	0.090404	VILL	incomplete-splice_match	3prime_fragment
289897	8.88149	6.1733	1.96891	3.1354	0.00171622	0.090812	SHB	incomplete-splice_match	3prime_fragment
19529	5.7427	2.54962	0.813299	3.13491	0.0017191	0.090812	PSMD4	full-splice_match	alternative_3end
97456	7.33351	-1.46448	0.467122	-3.13511	0.00171792	0.090812	ICA1L	incomplete-splice_match	5prime_fragment
55686	9.18022	2.20351	0.702738	3.13561	0.00171495	0.090812	IFI27L2	novel_in_catalog	combination_of_known_junctions,intron_retention
252775	17.9774	3.87788	1.23777	3.13296	0.00173053	0.0908504	DZIP3	incomplete-splice_match	3prime_fragment
162881	65.4911	2.3043	0.735371	3.13352	0.00172723	0.0908504	BEX4	full-splice_match	alternative_3end
81401	7.87242	-2.96615	0.946832	-3.13271	0.00173199	0.0908504	FDX2	novel_in_catalog	combination_of_known_junctions,intron_retention
122277	25.5809	-2.42547	0.774456	-3.13184	0.00173713	0.0909071	SNHG8	full-splice_match	mono-exon
1538	6.29747	4.75348	1.51862	3.13014	0.00174724	0.0912229	FLOT1	incomplete-splice_match	3prime_fragment
239631	15.7271	-4.45923	1.4262	-3.12666	0.00176805	0.092095	ENSG00000291176	full-splice_match	alternative_5end
127366	11.519	3.64627	1.16666	3.12538	0.00177573	0.0921029	WDR41	incomplete-splice_match	3prime_fragment
118069	19.7901	2.71167	0.86766	3.12527	0.00177643	0.0921029	MFSD10	full-splice_match	reference_match
104781	49.9331	3.30785	1.05884	3.12402	0.00178398	0.0921236	HMGN1	incomplete-splice_match	3prime_fragment
15307	44.7545	0.689503	0.220723	3.12384	0.00178505	0.0921236	H2AC25	full-splice_match	mono-exon
77543	7.35875	-4.71552	1.51009	-3.12267	0.00179218	0.0922788	RELCH	incomplete-splice_match	3prime_fragment
92319	8.46277	3.03288	0.971768	3.12099	0.00180245	0.0925946	MITD1	full-splice_match	alternative_5end
432808	13.9244	7.21036	2.31237	3.11816	0.00181981	0.0926521	PPP1CC	full-splice_match	alternative_3end5end
277638	5.23504	4.95831	1.58989	3.11865	0.00181679	0.0926521	WDR27	incomplete-splice_match	internal_fragment
270780	11.6458	6.24729	2.00355	3.11812	0.00182011	0.0926521	RPS14	novel_in_catalog	combination_of_known_junctions,intron_retention
523394	45.9908	-6.34822	2.03495	-3.1196	0.00181098	0.0926521	DENND5A	incomplete-splice_match	3prime_fragment
215682	11.9743	-3.5823	1.1494	-3.11667	0.00182908	0.0928975	NME4	incomplete-splice_match	3prime_fragment
57342	30.2068	0.961657	0.308629	3.1159	0.00183386	0.0929294	BLOC1S6	full-splice_match	alternative_3end
77659	5.94347	-1.56464	0.50272	-3.11235	0.00185602	0.0938401	NETO1-DT	full-splice_match	reference_match
228415	10.7661	6.84238	2.19959	3.11075	0.0018661	0.0941371	NARS1	novel_in_catalog	combination_of_known_junctions
381184	22.3269	6.46826	2.08049	3.10901	0.00187715	0.0943101	SEC24B	incomplete-splice_match	3prime_fragment
157684	11.3515	5.39131	1.73503	3.10732	0.00188789	0.0943101	IARS1	incomplete-splice_match	3prime_fragment
266107	7.72984	5.38149	1.73188	3.10731	0.00188796	0.0943101	NNT	incomplete-splice_match	3prime_fragment
58782	44.4371	1.40068	0.450697	3.10782	0.00188476	0.0943101	SLCO3A1	full-splice_match	mono-exon
254174	44.9623	-6.85925	2.20774	-3.1069	0.00189058	0.0943101	SLC41A3	incomplete-splice_match	3prime_fragment
104954	112.234	3.41959	1.10172	3.10387	0.00191006	0.0945454	PTTG1IP	full-splice_match	alternative_3end5end
60936	10.0668	-3.05889	0.985541	-3.10377	0.00191074	0.0945454	NTRK3	incomplete-splice_match	3prime_fragment
66726	5.39239	-6.05141	1.94984	-3.10354	0.00191218	0.0945454	ENKD1	full-splice_match	reference_match
393886	89.5109	-7.0067	2.25637	-3.10529	0.0019009	0.0945454	SNAP91	incomplete-splice_match	3prime_fragment
50612	41.4289	2.70995	0.873501	3.1024	0.00191958	0.0947022	GAS6	full-splice_match	mono-exon
26017	7.98011	4.30863	1.38911	3.10173	0.00192392	0.0947078	PCGF5	novel_in_catalog	combination_of_known_splicesites
410259	18.3404	6.90313	2.22632	3.10069	0.00193072	0.0948338	ENTR1	incomplete-splice_match	3prime_fragment
320353	37.2873	-7.42641	2.39714	-3.09803	0.00194812	0.0954792	SLC25A22	full-splice_match	reference_match
136926	12.4208	-5.35974	1.73067	-3.09692	0.00195544	0.0956287	LMBRD1	incomplete-splice_match	3prime_fragment
159746	9.82268	4.71263	1.52226	3.09581	0.00196273	0.095776	AK1	incomplete-splice_match	3prime_fragment
297521	7.63116	-4.58961	1.48304	-3.09474	0.00196987	0.0959155	MCF2	incomplete-splice_match	3prime_fragment
20081	31.1495	7.09889	2.29692	3.09062	0.00199741	0.0968354	CADM3	full-splice_match	alternative_3end
118804	5.76901	-2.26039	0.731287	-3.09098	0.00199496	0.0968354	KCNIP4	incomplete-splice_match	5prime_fragment
241009	22.7716	6.29003	2.03647	3.08869	0.00201043	0.0972558	R3HDM1	incomplete-splice_match	3prime_fragment
111539	70.3249	-4.76989	1.54463	-3.08805	0.00201476	0.0972558	CLASP2	incomplete-splice_match	3prime_fragment
86312	24.9871	-3.71434	1.20316	-3.08716	0.00202081	0.0973379	PNMA8A	incomplete-splice_match	3prime_fragment
130516	15.5309	4.88899	1.58466	3.08519	0.00203423	0.097774	CSNK1A1	incomplete-splice_match	3prime_fragment
34242	12.7358	-4.14035	1.34584	-3.0764	0.00209515	0.100487	RBM4	full-splice_match	reference_match
12672	5.66039	3.23571	1.05272	3.07367	0.00211444	0.101195	ZC3H11A	incomplete-splice_match	5prime_fragment
148672	90.2835	6.52362	2.12361	3.07195	0.00212664	0.101535	PHYHIP	full-splice_match	alternative_3end5end
537219	134.412	-7.81765	2.54531	-3.0714	0.00213061	0.101535	NISCH	incomplete-splice_match	3prime_fragment
164560	9.57387	2.51552	0.819533	3.06945	0.0021445	0.10198	RPL10	incomplete-splice_match	intron_retention
256700	5.23412	3.7674	1.22977	3.06351	0.00218757	0.10305	CHL1	incomplete-splice_match	3prime_fragment
45184	18.7877	3.75783	1.22703	3.06255	0.00219461	0.10305	ZFC3H1	full-splice_match	alternative_3end5end
156135	21.4957	3.13295	1.02206	3.06533	0.00217433	0.10305	CTSL	full-splice_match	alternative_3end
162903	109.185	1.4091	0.460101	3.0626	0.00219425	0.10305	TCEAL9	full-splice_match	alternative_5end
60282	6.40068	-2.18344	0.712419	-3.06482	0.002178	0.10305	H2AZ2P1	full-splice_match	mono-exon
110877	13.6095	-3.93102	1.28283	-3.06434	0.00218148	0.10305	DYNC1LI1	incomplete-splice_match	3prime_fragment
369914	7.8784	-5.41234	1.76831	-3.06073	0.00220796	0.10346	TCEA2	full-splice_match	alternative_5end
32766	5.65681	5.14845	1.68441	3.05652	0.00223919	0.104269	TMEM216	full-splice_match	alternative_5end
25714	12.6761	4.87402	1.59449	3.05678	0.00223727	0.104269	HK1	incomplete-splice_match	3prime_fragment
107923	5.59723	3.34777	1.09527	3.05656	0.00223889	0.104269	OXSM	full-splice_match	reference_match
14531	7.29233	3.17023	1.03758	3.05542	0.00224747	0.104437	ACTN2	incomplete-splice_match	3prime_fragment
346459	30.3925	-4.16679	1.36487	-3.05289	0.00226649	0.105103	ENSG00000290976	incomplete-splice_match	3prime_fragment
142905	42.8967	-5.95096	1.9502	-3.05146	0.00227735	0.105388	GTF2I	incomplete-splice_match	3prime_fragment
219141	10.1757	6.76029	2.21667	3.04974	0.00229038	0.105773	ACSF3	incomplete-splice_match	3prime_fragment
403644	6.12247	3.85719	1.26509	3.04894	0.00229649	0.105837	TOX	incomplete-splice_match	3prime_fragment
361990	12.9377	-5.18886	1.70227	-3.04819	0.00230222	0.105883	EIF2AK3	full-splice_match	alternative_3end5end
360011	17.4886	-3.82941	1.25673	-3.04713	0.00231036	0.10604	HTRA2	incomplete-splice_match	3prime_fragment
134452	29.7869	1.47616	0.48474	3.04525	0.00232487	0.106488	ENSG00000289276	full-splice_match	mono-exon
419089	18.3459	-6.66846	2.1905	-3.04426	0.00233252	0.10662	EXTL1	incomplete-splice_match	3prime_fragment
119219	8.34715	-2.36161	0.776503	-3.04134	0.00235526	0.10744	OCIAD1	full-splice_match	alternative_3end5end
45779	37.5245	2.16634	0.713133	3.03778	0.00238328	0.108277	LTA4H	incomplete-splice_match	3prime_fragment
20106	6.04978	-2.54239	0.836862	-3.038	0.00238152	0.108277	LINC01145	novel_in_catalog	combination_of_known_splicesites
48011	6.42851	5.33509	1.75716	3.03621	0.00239575	0.108317	N4BP2L2	full-splice_match	alternative_3end
44290	7.03976	2.0834	0.68627	3.03584	0.00239867	0.108317	PXMP2	full-splice_match	alternative_5end
213277	11.5201	-4.24478	1.39821	-3.03588	0.00239838	0.108317	MTFMT	incomplete-splice_match	3prime_fragment
211985	8.29043	6.46641	2.13247	3.03236	0.00242653	0.108482	PDIA3	incomplete-splice_match	5prime_fragment
225254	7.09979	5.25855	1.73314	3.03411	0.00241249	0.108482	ACLY	incomplete-splice_match	3prime_fragment
90425	57.6951	3.77205	1.24371	3.0329	0.00242212	0.108482	RTN4	incomplete-splice_match	3prime_fragment
148929	6.44297	2.75084	0.906915	3.03318	0.0024199	0.108482	PSD3	incomplete-splice_match	3prime_fragment
86636	25.5453	-3.56894	1.17622	-3.03424	0.0024114	0.108482	SH3YL1	novel_in_catalog	combination_of_known_junctions
298155	9.71917	6.69316	2.20803	3.03128	0.00243522	0.108654	WASH6P	incomplete-splice_match	3prime_fragment
180751	7.92416	5.30226	1.74981	3.03018	0.00244404	0.10883	ATG4C	incomplete-splice_match	3prime_fragment
111551	45.5531	4.88394	1.61233	3.02913	0.00245263	0.108996	CLASP2	incomplete-splice_match	3prime_fragment
254937	8.24402	6.00194	1.98241	3.0276	0.00246505	0.109228	GFM1	incomplete-splice_match	3prime_fragment
241349	18.7086	4.23389	1.39857	3.02729	0.0024676	0.109228	ZEB2	incomplete-splice_match	intron_retention
75214	10.2372	4.27178	1.412	3.02534	0.00248354	0.109716	RAB40B	novel_in_catalog	combination_of_known_junctions
55821	19.9142	5.07116	1.67882	3.02067	0.00252215	0.111167	SETD3	incomplete-splice_match	3prime_fragment
241389	11.211	2.04545	0.677261	3.02017	0.00252629	0.111167	MBD5	incomplete-splice_match	3prime_fragment
435487	26.17	6.19033	2.05158	3.01735	0.00254993	0.111549	TOGARAM1	incomplete-splice_match	3prime_fragment
11362	9.67101	4.48455	1.4861	3.01766	0.00254734	0.111549	SFPQ	incomplete-splice_match	3prime_fragment
421549	21.5512	-5.60574	1.85782	-3.01738	0.00254973	0.111549	RSRP1	incomplete-splice_match	3prime_fragment
265993	10.5731	6.81246	2.25888	3.01586	0.00256252	0.111822	NIPBL	incomplete-splice_match	3prime_fragment
144493	41.6176	5.49316	1.82168	3.01543	0.00256614	0.111822	SGCE	full-splice_match	alternative_3end
22358	12.7068	-1.52343	0.505318	-3.01478	0.00257162	0.111843	IGSF8	incomplete-splice_match	internal_fragment
86531	8.6366	5.32832	1.76817	3.01347	0.00258281	0.112112	TMEM143	incomplete-splice_match	3prime_fragment
198801	5.27018	5.4208	1.80189	3.0084	0.00262625	0.113777	TUBA1C	full-splice_match	alternative_3end
296882	11.6521	5.15043	1.71406	3.00481	0.00265749	0.114492	PRPS1	incomplete-splice_match	3prime_fragment
32811	30.6954	2.15385	0.716548	3.00588	0.00264817	0.114492	SDHAF2	full-splice_match	alternative_3end5end
110218	17.3315	-4.45761	1.48353	-3.00474	0.00265808	0.114492	NDUFAF3	full-splice_match	alternative_3end
347518	14.3352	-7.08536	2.35861	-3.00404	0.00266423	0.114536	LUC7L3	incomplete-splice_match	intron_retention
292403	12.8037	4.39366	1.4636	3.00196	0.00268244	0.115098	NCS1	incomplete-splice_match	3prime_fragment
87812	8.56009	4.87184	1.62373	3.0004	0.00269627	0.11547	PDIA6	incomplete-splice_match	3prime_fragment
66450	12.5752	-1.85352	0.617948	-2.99948	0.00270438	0.115597	NUP93-DT	full-splice_match	mono-exon
96668	11.4951	2.51583	0.839258	2.99768	0.00272042	0.115732	SLC39A10	incomplete-splice_match	3prime_fragment
138400	5.20495	-1.9161	0.639083	-2.9982	0.00271577	0.115732	TULP4	novel_not_in_catalog	Alt3
231028	36.7071	-4.4694	1.4911	-2.99739	0.00272305	0.115732	TLE5	incomplete-splice_match	3prime_fragment
62926	10.6934	-2.34462	0.782409	-2.99667	0.00272944	0.115784	METRN	full-splice_match	alternative_3end5end
93124	5.27746	3.35123	1.11959	2.99326	0.00276015	0.116866	PANTR1	full-splice_match	reference_match
285772	11.511	-3.49917	1.16982	-2.9912	0.00277883	0.117435	TMEM68	incomplete-splice_match	3prime_fragment
55141	48.1684	2.24247	0.749835	2.99061	0.00278418	0.117439	GSKIP	full-splice_match	alternative_3end
107402	8.68311	-3.58483	1.19895	-2.98998	0.00279	0.117463	MCAT	full-splice_match	alternative_3end
141554	8.05177	-2.38076	0.796582	-2.98872	0.00280149	0.117726	COA1	incomplete-splice_match	5prime_fragment
161008	7.81616	-2.43046	0.813631	-2.98718	0.00281563	0.118098	TRAPPC2	incomplete-splice_match	5prime_fragment
259046	14.2425	6.54335	2.19151	2.98577	0.00282861	0.118421	QRICH1	incomplete-splice_match	3prime_fragment
158655	9.75232	-3.11596	1.04413	-2.98426	0.00284268	0.118788	FUBP3	full-splice_match	alternative_3end5end
74618	13.9253	-5.68656	1.90673	-2.98236	0.00286032	0.119303	CASKIN2	incomplete-splice_match	3prime_fragment
48897	8.02683	5.37437	1.80336	2.98019	0.00288068	0.119928	ENOX1	incomplete-splice_match	3prime_fragment
403267	6.21889	3.73138	1.25286	2.97829	0.00289862	0.120451	TCEA1	full-splice_match	alternative_3end5end
126655	16.7959	-6.23068	2.09274	-2.97728	0.00290818	0.120625	PAM	incomplete-splice_match	3prime_fragment
82484	43.761	3.11082	1.04569	2.97491	0.00293073	0.121335	RPL13A	full-splice_match	alternative_3end
139885	29.16	3.4669	1.16591	2.97357	0.00294361	0.121644	RAC1	full-splice_match	alternative_5end
66575	17.9229	-3.7577	1.2647	-2.97123	0.00296613	0.122349	DYNC1LI2	incomplete-splice_match	3prime_fragment
133438	35.3901	5.57404	1.87731	2.96916	0.00298614	0.122538	RANBP9	incomplete-splice_match	3prime_fragment
283739	5.23014	4.27548	1.44059	2.96788	0.00299865	0.122538	KMT2C	incomplete-splice_match	internal_fragment
47945	7.04643	2.52662	0.851429	2.9675	0.0030023	0.122538	HSPH1	incomplete-splice_match	3prime_fragment
109767	5.54227	-2.29546	0.773566	-2.96737	0.00300355	0.122538	MYRIP	incomplete-splice_match	5prime_fragment
231250	19.4579	-3.25027	1.0953	-2.96748	0.00300249	0.122538	SAFB2	incomplete-splice_match	3prime_fragment
36273	15.347	-3.81516	1.28454	-2.97007	0.00297735	0.122538	LTBP3	incomplete-splice_match	3prime_fragment
127935	15.182	-3.09845	1.04439	-2.96674	0.00300975	0.122568	ZRSR2P1	full-splice_match	mono-exon
217433	7.04913	5.77627	1.94752	2.96596	0.00301737	0.122655	NOMO2	incomplete-splice_match	3prime_fragment
285735	7.98971	-3.05915	1.03188	-2.96463	0.00303044	0.122963	ATP6V1H	full-splice_match	alternative_3end
45437	17.9271	-2.67186	0.901715	-2.96309	0.00304569	0.123136	PPP1R12A	full-splice_match	alternative_3end5end
123217	17.0826	-4.29275	1.44854	-2.9635	0.00304161	0.123136	TMEM144	incomplete-splice_match	3prime_fragment
343438	32.9186	-5.90636	1.9946	-2.96117	0.0030647	0.123681	NAGPA	incomplete-splice_match	intron_retention
70254	60.716	1.31253	0.443407	2.96011	0.00307531	0.123886	ENSG00000279207	full-splice_match	mono-exon
426690	5.77617	4.07427	1.37683	2.95917	0.00308473	0.12391	OPCML	incomplete-splice_match	3prime_fragment
107241	6.09656	3.76986	1.27429	2.95839	0.0030925	0.12391	CHADL	novel_in_catalog	combination_of_known_splicesites
83692	5.51727	-4.28157	1.4472	-2.95853	0.00309114	0.12391	RBM42	incomplete-splice_match	3prime_fragment
279031	8.57653	6.51506	2.20351	2.95667	0.00310979	0.12438	GSDME	incomplete-splice_match	3prime_fragment
127743	11.2891	1.72254	0.582712	2.95608	0.0031158	0.124399	NPM1P27	full-splice_match	mono-exon
62420	8.34581	1.67048	0.565509	2.95394	0.00313746	0.125041	MIR762HG	full-splice_match	mono-exon
64001	10.4827	-4.66152	1.57841	-2.9533	0.00314397	0.125077	RSL1D1	incomplete-splice_match	3prime_fragment
103938	15.8048	5.22801	1.77081	2.95232	0.00315396	0.125252	TTC3	incomplete-splice_match	3prime_fragment
81445	11.8438	5.54545	1.87974	2.95011	0.00317662	0.125929	S1PR5	full-splice_match	alternative_3end
43724	90.2292	-0.738909	0.250683	-2.94758	0.00320269	0.126738	VEZT	full-splice_match	alternative_3end5end
14143	15.329	-5.20212	1.76615	-2.94545	0.00322487	0.127166	H3-3A	novel_not_in_catalog	novel_exon
15298	82.3116	-5.40715	1.83556	-2.94578	0.00322144	0.127166	C1orf35	incomplete-splice_match	3prime_fragment
161366	18.6382	6.19398	2.10354	2.94455	0.00323429	0.127314	RBM3	incomplete-splice_match	3prime_fragment
20352	17.3746	3.40329	1.15649	2.94277	0.00325289	0.127597	ENSA	full-splice_match	reference_match
309187	135.931	-4.887	1.66044	-2.9432	0.00324839	0.127597	TNFRSF25	full-splice_match	reference_match
73157	14.678	4.38595	1.49093	2.94175	0.00326362	0.127795	SEPTIN4	full-splice_match	reference_match
37662	13.1598	-2.38444	0.81072	-2.94113	0.00327014	0.127826	CRYAB	full-splice_match	alternative_5end
52879	14.9657	6.51264	2.21652	2.93823	0.00330095	0.128705	DLST	incomplete-splice_match	3prime_fragment
43284	173.327	2.45684	0.836247	2.93793	0.0033041	0.128705	KCNMB4	full-splice_match	alternative_3end5end
124726	7.95158	3.52967	1.20202	2.93646	0.00331977	0.1289	ZFR	full-splice_match	alternative_3end5end
115818	7.58769	-3.31687	1.12958	-2.93638	0.00332063	0.1289	CLDN11	full-splice_match	alternative_3end
52991	155.148	2.55227	0.869415	2.93562	0.00332883	0.128995	AHSA1	full-splice_match	alternative_5end
401512	7.79273	4.77723	1.62828	2.9339	0.00334727	0.129485	EZH2	incomplete-splice_match	3prime_fragment
37185	20.8047	4.93192	1.682	2.93218	0.00336593	0.129777	PICALM	incomplete-splice_match	3prime_fragment
94093	47.9809	4.40635	1.50305	2.9316	0.00337218	0.129777	GAD1	full-splice_match	alternative_3end5end
37464	13.4914	3.49446	1.19198	2.93163	0.00337184	0.129777	CWC15	full-splice_match	reference_match
66757	10.2866	2.01921	0.688989	2.93069	0.00338209	0.129935	ENSG00000261884	incomplete-splice_match	5prime_fragment
163834	29.827	6.47494	2.21181	2.92744	0.00341763	0.129968	MORF4L2	incomplete-splice_match	3prime_fragment
270100	13.4923	3.48726	1.19078	2.92856	0.00340533	0.129968	P4HA2	full-splice_match	alternative_3end5end
11797	10.2197	3.19292	1.08997	2.92937	0.00339651	0.129968	PTP4A2	incomplete-splice_match	3prime_fragment
67973	17.4795	2.34579	0.801459	2.9269	0.00342356	0.129968	RANGRF	full-splice_match	alternative_3end
77960	8.93806	1.53538	0.524521	2.92721	0.0034202	0.129968	MBP	incomplete-splice_match	5prime_fragment
75666	74.7672	-1.60738	0.549	-2.92784	0.00341324	0.129968	RNMT	incomplete-splice_match	5prime_fragment
107073	17.3583	-2.61465	0.893114	-2.92757	0.00341624	0.129968	RBFOX2	full-splice_match	alternative_3end5end
291204	18.4945	5.21077	1.7811	2.92559	0.003438	0.130152	TMEFF1	incomplete-splice_match	3prime_fragment
93501	18.592	3.65525	1.24985	2.92455	0.00344951	0.130152	UBXN4	incomplete-splice_match	3prime_fragment
71483	1179.18	3.30827	1.13131	2.92428	0.00345258	0.130152	CNP	full-splice_match	alternative_3end
106583	7.50199	3.21388	1.0992	2.92384	0.00345746	0.130152	YDJC	full-splice_match	reference_match
149730	19.6322	3.04036	1.03967	2.92436	0.00345165	0.130152	UBE2V2	full-splice_match	alternative_3end
239318	7.34347	3.56171	1.21854	2.92294	0.00346747	0.130309	ST3GAL5	incomplete-splice_match	3prime_fragment
47388	16.4173	-2.36827	0.810544	-2.92183	0.00347979	0.130335	POLR1D	full-splice_match	alternative_5end
63816	9.62235	-3.17631	1.08706	-2.92193	0.00347871	0.130335	NAGPA	incomplete-splice_match	5prime_fragment
13941	6.77291	-1.17637	0.402704	-2.92117	0.0034872	0.130394	SCCPDH	incomplete-splice_match	5prime_fragment
138313	12.9942	-6.13602	2.10108	-2.92041	0.0034957	0.130494	TIAM2	incomplete-splice_match	3prime_fragment
305675	8.97451	4.4858	1.53735	2.91788	0.00352421	0.130904	PEA15	incomplete-splice_match	3prime_fragment
62437	6.78739	4.38828	1.5038	2.91813	0.00352134	0.130904	STX4	incomplete-splice_match	internal_fragment
153485	47.1464	2.528	0.866244	2.91835	0.00351893	0.130904	TMEM276	full-splice_match	alternative_5end
53377	32.9021	-5.6415	1.9353	-2.91506	0.00355626	0.131876	GPHN	incomplete-splice_match	3prime_fragment
140087	5.81734	4.18742	1.43757	2.91285	0.00358148	0.132373	WIPI2	full-splice_match	alternative_3end5end
36540	22.5219	3.30728	1.13531	2.91312	0.00357834	0.132373	TMEM134	novel_in_catalog	combination_of_known_junctions
47877	73.9238	2.70797	0.93064	2.9098	0.0036166	0.133451	UBL3	full-splice_match	alternative_3end
144947	15.7031	1.38082	0.474845	2.90794	0.00363814	0.134025	FIS1	full-splice_match	reference_match
190032	14.8445	5.22385	1.79811	2.90519	0.00367028	0.134106	CTBP2	incomplete-splice_match	3prime_fragment
81936	48.6849	5.08533	1.74971	2.90638	0.0036564	0.134106	AKAP8L	full-splice_match	reference_match
204806	8.23952	4.10929	1.41408	2.90597	0.00366111	0.134106	TRIM13	full-splice_match	alternative_3end
25359	5.62767	-1.42269	0.489382	-2.90711	0.00364787	0.134106	CISD1	incomplete-splice_match	5prime_fragment
14378	9.7336	-4.002	1.37733	-2.90562	0.00366522	0.134106	COG2	incomplete-splice_match	3prime_fragment
161200	7.62889	3.48793	1.20122	2.90365	0.00368843	0.13455	ATP6AP2	incomplete-splice_match	3prime_fragment
114306	9.35613	4.28863	1.47782	2.90201	0.00370781	0.135037	ALDH1L1	incomplete-splice_match	3prime_fragment
86271	14.2475	-4.05503	1.39832	-2.89993	0.00373247	0.135714	DMWD	incomplete-splice_match	3prime_fragment
26612	28.2136	-3.61527	1.24696	-2.89927	0.00374036	0.13578	JMJD1C	full-splice_match	alternative_5end
356910	19.2101	4.25707	1.46946	2.89704	0.00376706	0.136359	MAP3K10	incomplete-splice_match	3prime_fragment
144299	13.3948	4.23918	1.4636	2.89641	0.00377456	0.136359	SRI	incomplete-splice_match	3prime_fragment
99508	28.5013	-1.72647	0.596024	-2.89665	0.00377169	0.136359	PLCB1	incomplete-splice_match	5prime_fragment
19916	22.442	3.69172	1.27504	2.89538	0.00378696	0.136367	SYT11	full-splice_match	alternative_3end5end
69389	19.5249	3.06854	1.05966	2.89579	0.00378204	0.136367	NCOR1	incomplete-splice_match	3prime_fragment
478267	11.1521	5.90162	2.03954	2.8936	0.00380851	0.136923	MAPKAP1	incomplete-splice_match	3prime_fragment
207986	5.82163	3.61506	1.24965	2.89285	0.00381762	0.137031	STXBP6	incomplete-splice_match	3prime_fragment
36332	33.211	-3.10507	1.0745	-2.88979	0.00385495	0.138149	CFL1	full-splice_match	alternative_3end
447295	11.5083	6.93679	2.40396	2.88556	0.00390713	0.138786	AP3D1	full-splice_match	alternative_3end5end
229212	6.25184	6.06109	2.10056	2.88547	0.00390836	0.138786	RFXANK	full-splice_match	alternative_3end5end
338895	6.08329	5.18102	1.79505	2.88629	0.00389818	0.138786	SCG3	incomplete-splice_match	3prime_fragment
545	20.3914	3.55318	1.23146	2.88534	0.0039099	0.138786	FLOT1	full-splice_match	alternative_5end
94756	20.2458	3.27036	1.13288	2.88678	0.00389211	0.138786	NCKAP5	novel_not_in_catalog	novel_exon
45893	10.278	2.84473	0.985287	2.88721	0.00388678	0.138786	BLTP3B	incomplete-splice_match	3prime_fragment
129462	5.52391	-1.63585	0.567216	-2.884	0.00392658	0.13913	DTWD2	full-splice_match	alternative_3end5end
93373	6.01701	-1.64012	0.568783	-2.88356	0.00393202	0.13913	C2orf27A	incomplete-splice_match	5prime_fragment
117671	5.50543	-4.00589	1.39088	-2.88012	0.00397526	0.140438	FAM193A	incomplete-splice_match	3prime_fragment
104852	18.8207	2.39581	0.832146	2.87907	0.00398847	0.140637	RSPH1	novel_not_in_catalog	novel_exon
30178	48.2407	2.3191	0.805614	2.87868	0.00399343	0.140637	IFITM1	full-splice_match	reference_match
455672	42.0855	6.30651	2.19165	2.87752	0.00400811	0.140864	EEF1A2	incomplete-splice_match	internal_fragment
15525	8.13848	-5.02279	1.74573	-2.87718	0.00401246	0.140864	ARID4B	incomplete-splice_match	5prime_fragment
11784	7.2731	-3.25948	1.13357	-2.87541	0.00403503	0.141434	PTP4A2	incomplete-splice_match	3prime_fragment
53936	25.6459	3.05391	1.06232	2.87476	0.00404339	0.141506	EXOC5	incomplete-splice_match	3prime_fragment
368144	10.1921	-4.50087	1.5664	-2.87339	0.00406098	0.1419	PYGB	full-splice_match	alternative_3end5end
30932	14.1138	5.80148	2.02013	2.87183	0.00408103	0.142378	CAPRIN1	incomplete-splice_match	internal_fragment
22363	5.20208	-4.28051	1.49106	-2.87078	0.00409464	0.142631	TMCO1	incomplete-splice_match	3prime_fragment
142971	25.9143	-3.54815	1.23705	-2.86824	0.00412766	0.143558	NSUN5P1	incomplete-splice_match	3prime_fragment
211280	7.38222	-5.06503	1.7663	-2.86759	0.00413616	0.143631	SNHG14	incomplete-splice_match	3prime_fragment
169591	5.43104	5.39974	1.88395	2.86618	0.00415453	0.143823	IBTK	incomplete-splice_match	3prime_fragment
187198	12.303	-5.01773	1.75062	-2.86626	0.00415359	0.143823	ZDHHC16	incomplete-splice_match	3prime_fragment
280600	11.2214	4.36476	1.52389	2.86422	0.00418038	0.144494	CPSF4	full-splice_match	alternative_3end5end
194814	15.6489	8.57355	2.99451	2.86309	0.00419528	0.144769	PAK1	incomplete-splice_match	3prime_fragment
144539	12.0118	4.87068	1.70187	2.86196	0.00421026	0.144769	PON2	incomplete-splice_match	3prime_fragment
173673	9.35511	4.66523	1.63021	2.86174	0.00421322	0.144769	ACAP3	incomplete-splice_match	3prime_fragment
34234	12.3284	-3.53626	1.23573	-2.86167	0.00421418	0.144769	RBM4	full-splice_match	reference_match
505441	13.849	-5.7681	2.01632	-2.8607	0.00422701	0.144987	TUBGCP6	incomplete-splice_match	intron_retention
235019	8.67752	-4.1524	1.45193	-2.85992	0.00423751	0.145125	XRCC1	incomplete-splice_match	3prime_fragment
140214	5.94743	1.49262	0.522148	2.85862	0.00425486	0.145497	ITGB8	incomplete-splice_match	5prime_fragment
27514	19.1987	2.71531	0.950041	2.8581	0.00426193	0.145516	UBTD1	full-splice_match	alternative_5end
83287	9.11446	-0.850177	0.297593	-2.85685	0.0042787	0.145867	ERVK3-1	full-splice_match	alternative_3end
53550	10.0034	2.84991	0.997973	2.8557	0.0042942	0.146172	TTC9	full-splice_match	alternative_3end
81830	7.56694	1.37084	0.480352	2.85384	0.00431949	0.146738	MIR23AHG	full-splice_match	mono-exon
32241	5.51204	-4.57788	1.6043	-2.85351	0.00432391	0.146738	APIP	incomplete-splice_match	3prime_fragment
105473	20.3688	-4.08025	1.4307	-2.85192	0.00434554	0.147249	CRYBB2P1	full-splice_match	reference_match
24389	21.4223	2.85952	1.00292	2.85119	0.00435559	0.14734	ARHGAP12	incomplete-splice_match	3prime_fragment
60675	8.58473	1.31064	0.459807	2.85041	0.00436624	0.14734	RASGRF1	full-splice_match	mono-exon
18780	38.9801	-4.72797	1.65877	-2.85029	0.00436796	0.14734	FBXO44	novel_in_catalog	combination_of_known_junctions,intron_retention
586133	400.193	-8.29208	2.91012	-2.84939	0.00438032	0.147534	SLC22A17	incomplete-splice_match	3prime_fragment
5432	6.75676	-4.03385	1.416	-2.84876	0.00438894	0.147603	CPSF1	incomplete-splice_match	3prime_fragment
186506	8.07512	5.16145	1.81377	2.8457	0.00443133	0.148805	CCAR1	incomplete-splice_match	3prime_fragment
205656	14.5103	5.22878	1.83949	2.84252	0.00447579	0.148839	RBM26	incomplete-splice_match	3prime_fragment
66452	6.57861	4.47703	1.57482	2.84288	0.00447076	0.148839	PSME3IP1	incomplete-splice_match	3prime_fragment
62988	12.736	4.13581	1.45471	2.84305	0.00446835	0.148839	HAGHL	full-splice_match	reference_match
15411	6.36714	3.67329	1.29188	2.84337	0.00446394	0.148839	AGT	incomplete-splice_match	3prime_fragment
85965	9.51324	-1.30876	0.460094	-2.84454	0.00444753	0.148839	DMAC2	full-splice_match	mono-exon
145650	11.2383	-2.82871	0.995217	-2.8423	0.00447887	0.148839	GTF2IP1	incomplete-splice_match	3prime_fragment
68228	16.7175	-4.54996	1.59975	-2.84417	0.00445269	0.148839	MPRIP	incomplete-splice_match	3prime_fragment
64651	59.1755	1.53438	0.540783	2.83732	0.0045494	0.150959	NUPR1	full-splice_match	alternative_3end5end
518367	6.58595	6.13283	2.16401	2.83401	0.00459674	0.152304	RING1	incomplete-splice_match	3prime_fragment
130479	47.1297	7.84036	2.76778	2.83273	0.00461524	0.152691	SPARC	full-splice_match	alternative_3end5end
497555	87.3443	8.41733	2.97452	2.82982	0.00465748	0.153523	SNHG25	novel_not_in_catalog	Alt5
41683	5.7095	2.30743	0.815385	2.82986	0.0046568	0.153523	BLOC1S1	full-splice_match	reference_match
36732	21.5895	-3.63182	1.28352	-2.82958	0.00466093	0.153523	LAMTOR1	novel_in_catalog	combination_of_known_junctions
36269	804.321	2.6211	0.928558	2.82276	0.00476115	0.156594	TALAM1	full-splice_match	mono-exon
50278	18.2096	5.15583	1.82753	2.8212	0.0047844	0.156963	NAXD	full-splice_match	alternative_3end
46890	28.2646	3.42084	1.2126	2.82107	0.0047864	0.156963	CDK2AP1	full-splice_match	reference_match
72792	9.2267	1.20481	0.427365	2.81915	0.00481509	0.157673	MIEN1	full-splice_match	alternative_5end
140308	18.2375	2.36308	0.838483	2.81828	0.00482817	0.157871	PSMG3	full-splice_match	reference_match
7594	35.9892	1.81425	0.644043	2.81697	0.00484797	0.158287	OMG	full-splice_match	mono-exon
15297	168.565	2.96333	1.0528	2.81471	0.00488212	0.15917	C1orf35	full-splice_match	reference_match
17653	17.547	2.78808	0.990958	2.81352	0.0049003	0.15953	BCAS2	full-splice_match	alternative_3end
37948	21.9299	2.27301	0.808035	2.81301	0.00490806	0.159551	H2AX	full-splice_match	reference_match
136014	13.1203	1.48145	0.526847	2.81191	0.00492488	0.159866	TPD52L1	incomplete-splice_match	5prime_fragment
276918	61.8126	7.59788	2.70459	2.80925	0.00496566	0.160492	SGK1	incomplete-splice_match	3prime_fragment
439929	5.87429	5.51373	1.96229	2.80985	0.00495642	0.160492	ZNF598	incomplete-splice_match	3prime_fragment
258922	58.3344	-4.99737	1.77887	-2.8093	0.00496491	0.160492	MAP4	incomplete-splice_match	3prime_fragment
16830	6.59762	3.56568	1.26978	2.80811	0.00498327	0.160597	GSTM2	full-splice_match	alternative_3end
29485	6.85265	3.02466	1.07699	2.80845	0.00497813	0.160597	FGFR2	incomplete-splice_match	3prime_fragment
42693	8.60707	1.01572	0.362084	2.80522	0.00502829	0.161807	PTGES3	incomplete-splice_match	5prime_fragment
44916	28.5086	-4.81358	1.71621	-2.80477	0.00503523	0.161807	HIP1R	incomplete-splice_match	3prime_fragment
66303	9.99841	4.85079	1.73084	2.80256	0.00506989	0.161817	ITFG1	incomplete-splice_match	3prime_fragment
109191	9.79973	4.01444	1.4318	2.80378	0.00505079	0.161817	STT3B	full-splice_match	alternative_3end
1255	37.1216	1.94267	0.693027	2.80316	0.00506044	0.161817	HSPA1B	full-splice_match	mono-exon
32073	7.20618	3.49321	1.24597	2.80359	0.00505364	0.161817	SERGEF	novel_in_catalog	combination_of_known_junctions
282474	8.10299	-4.06404	1.45018	-2.80244	0.00507169	0.161817	NRCAM	incomplete-splice_match	3prime_fragment
37145	8.26092	3.17887	1.13516	2.80038	0.00510429	0.162401	CREBZF	full-splice_match	alternative_3end5end
156155	6.19929	1.50843	0.538656	2.80036	0.0051045	0.162401	S1PR3	full-splice_match	mono-exon
156580	6.60479	-1.04914	0.374817	-2.79907	0.00512501	0.162823	STX17	incomplete-splice_match	5prime_fragment
47390	11.2387	4.27957	1.53014	2.79684	0.00516051	0.163718	POLR1D	novel_in_catalog	combination_of_known_junctions
158514	8.43817	4.85503	1.73697	2.79511	0.00518821	0.164062	LRRC8A	incomplete-splice_match	3prime_fragment
128124	27.9816	-1.93286	0.691456	-2.79534	0.00518445	0.164062	NREP	full-splice_match	alternative_5end
10391	18.0018	-2.47556	0.885919	-2.79434	0.00520065	0.164062	IPO13	full-splice_match	alternative_5end
100958	10.1965	4.72153	1.68942	2.79476	0.00519376	0.164062	RAB5IF	novel_in_catalog	combination_of_known_junctions,intron_retention
56350	8.64452	5.7156	2.04629	2.79315	0.0052198	0.164435	ENSG00000274253	novel_not_in_catalog	partial_intron_retention
75889	84.8554	6.041	2.16484	2.79051	0.00526258	0.165549	EPB41L3	incomplete-splice_match	3prime_fragment
219773	6.51013	5.6527	2.02637	2.78957	0.00527774	0.165793	FHOD1	incomplete-splice_match	3prime_fragment
118543	5.84759	4.10174	1.47143	2.78759	0.00531011	0.166137	RBPJ	incomplete-splice_match	5prime_fragment
100137	9.56349	3.90622	1.40151	2.78714	0.0053175	0.166137	TRMT6	incomplete-splice_match	3prime_fragment
38765	5.35607	1.62378	0.582609	2.78709	0.00531835	0.166137	MED21	full-splice_match	mono-exon
107022	6.48574	-3.83744	1.37676	-2.78729	0.00531501	0.166137	BAIAP2L2	incomplete-splice_match	3prime_fragment
90429	155.508	3.69419	1.32573	2.78653	0.00532754	0.166193	RTN4	full-splice_match	reference_match
57441	9.77874	2.34279	0.841056	2.78553	0.00534408	0.166476	TYRO3	incomplete-splice_match	5prime_fragment
201786	26.0832	5.05861	1.81735	2.78351	0.0053774	0.16724	ATP2A2	incomplete-splice_match	3prime_fragment
31768	11.1712	1.59745	0.574067	2.78269	0.00539097	0.16724	RNF141	full-splice_match	reference_match
126957	11.2531	-1.28413	0.461467	-2.78271	0.0053907	0.16724	TMEM167A	full-splice_match	alternative_3end5end
597052	6.31503	5.61515	2.01973	2.78014	0.00543352	0.167862	KCNG1	incomplete-splice_match	3prime_fragment
172831	23.4522	5.49332	1.97539	2.78088	0.00542117	0.167862	CSDE1	full-splice_match	alternative_3end5end
157236	13.511	3.22049	1.15833	2.7803	0.00543086	0.167862	SEMA4D	full-splice_match	alternative_5end
65861	11.0095	4.86621	1.75065	2.77966	0.00544155	0.167879	USP10	incomplete-splice_match	3prime_fragment
149314	9.63474	3.90783	1.40879	2.77389	0.00553901	0.170416	NSD3	incomplete-splice_match	3prime_fragment
33629	6.92759	4.63956	1.67252	2.774	0.00553723	0.170416	FKBP2	novel_in_catalog	combination_of_known_junctions,intron_retention
4026	22.913	4.17342	1.50536	2.77237	0.00556489	0.170743	TJP1	incomplete-splice_match	3prime_fragment
55248	10.2234	3.36278	1.21288	2.77256	0.00556166	0.170743	MARK3	full-splice_match	alternative_3end5end
36338	29.4247	2.87916	1.03911	2.77079	0.00559204	0.171299	FIBP	full-splice_match	alternative_3end5end
144806	13.53	1.18774	0.42872	2.77043	0.00559829	0.171299	CASTOR3P	full-splice_match	alternative_3end5end
152523	15.9863	-1.50207	0.542387	-2.76936	0.00561661	0.171625	SAMD12	full-splice_match	alternative_3end
40057	6.93942	4.00096	1.44553	2.76782	0.00564332	0.171943	HEBP1	incomplete-splice_match	3prime_fragment
140251	6.89957	3.55112	1.28318	2.76743	0.00565006	0.171943	PRKAR1B	incomplete-splice_match	3prime_fragment
26752	322.678	1.59665	0.576862	2.76782	0.00564321	0.171943	PPA1	full-splice_match	alternative_5end
101230	14.9315	-3.03416	1.09671	-2.7666	0.00566449	0.172148	YWHAB	incomplete-splice_match	3prime_fragment
239110	19.0103	3.86189	1.39654	2.76533	0.00568655	0.172351	ATOH8	full-splice_match	alternative_3end5end
72144	8.72886	-4.80739	1.73829	-2.76559	0.00568206	0.172351	SCRN2	incomplete-splice_match	intron_retention
264521	91.6254	6.80841	2.46492	2.76213	0.00574264	0.173816	GUCY1B1	incomplete-splice_match	3prime_fragment
326825	6.45406	-4.0518	1.46753	-2.76096	0.00576317	0.174202	PLEKHA5	incomplete-splice_match	internal_fragment
41524	18.5228	-1.9076	0.691087	-2.7603	0.00577491	0.174321	PFDN5	full-splice_match	alternative_5end
118327	39.2317	-5.13374	1.86066	-2.75909	0.00579619	0.174728	GAK	incomplete-splice_match	3prime_fragment
81990	6.41653	-1.87803	0.680925	-2.75805	0.00581474	0.175052	ZNF226	full-splice_match	alternative_3end
66302	16.2328	4.34321	1.57706	2.75399	0.00588735	0.17632	ITFG1	incomplete-splice_match	3prime_fragment
50223	6.60348	2.43514	0.884025	2.7546	0.00587633	0.17632	TEX30	full-splice_match	reference_match
125396	10.4801	-1.15601	0.419657	-2.75466	0.00587539	0.17632	PART1	full-splice_match	alternative_3end5end
24078	12.6554	-2.2058	0.801098	-2.75347	0.00589675	0.17632	COMMD3	full-splice_match	alternative_5end
1195	12.2399	-4.08592	1.48414	-2.75306	0.00590411	0.17632	FLOT1	incomplete-splice_match	3prime_fragment
34999	31.4391	-4.3404	1.57634	-2.75347	0.0058968	0.17632	AASDHPPT	full-splice_match	alternative_5end
160847	26.9411	4.32982	1.57336	2.75196	0.00592398	0.176678	SH3KBP1	incomplete-splice_match	3prime_fragment
92872	34.854	3.73002	1.3562	2.75034	0.00595337	0.177083	RANBP2	incomplete-splice_match	3prime_fragment
49316	10.6498	-3.1215	1.13492	-2.75041	0.00595213	0.177083	VPS36	incomplete-splice_match	5prime_fragment
233999	10.6457	3.92638	1.42832	2.74894	0.00597878	0.177603	PIH1D1	full-splice_match	alternative_5end
92116	7.26052	5.36088	1.95062	2.7483	0.00599057	0.177718	LMAN2L	incomplete-splice_match	3prime_fragment
473092	26.4572	5.31387	1.93418	2.74735	0.00600795	0.177998	FAM3C	full-splice_match	alternative_3end5end
155196	6.35974	3.01258	1.09715	2.74583	0.00603573	0.178584	TPM2	full-splice_match	alternative_5end
70811	22.8194	-2.99823	1.09262	-2.74408	0.00606807	0.179304	AMZ2	incomplete-splice_match	3prime_fragment
108745	6.08075	5.56819	2.03002	2.74292	0.00608953	0.179701	ATP2B2	full-splice_match	alternative_3end
68992	46.5046	2.7385	0.998555	2.74247	0.00609799	0.179714	SAT2	full-splice_match	alternative_5end
410099	10.4476	6.09548	2.22309	2.74189	0.00610864	0.179755	RABL6	incomplete-splice_match	3prime_fragment
81170	7.36462	4.03556	1.47201	2.74153	0.00611544	0.179755	NDUFA7	full-splice_match	alternative_5end
137177	7.75598	-4.22143	1.54106	-2.7393	0.00615697	0.180739	MAP3K7	incomplete-splice_match	3prime_fragment
124202	6.25616	-3.91178	1.42856	-2.73826	0.00617652	0.181075	GPM6A	incomplete-splice_match	3prime_fragment
318278	28.9967	4.47351	1.63462	2.73673	0.00620537	0.181349	HERC4	incomplete-splice_match	3prime_fragment
63841	73.4901	-1.29944	0.474859	-2.73648	0.00621012	0.181349	METTL26	full-splice_match	alternative_5end
11174	21.3861	3.54808	1.29623	2.73722	0.00619601	0.181349	TMEM59	novel_in_catalog	combination_of_known_splicesites
147223	27.1167	3.47212	1.26971	2.73458	0.00624596	0.182158	INSIG1	full-splice_match	alternative_3end
109709	9.91124	2.87588	1.05202	2.73368	0.00626316	0.182422	RPSA	novel_in_catalog	combination_of_known_splicesites
111370	5.32715	-3.575	1.30803	-2.73312	0.00627369	0.182491	ANO10	incomplete-splice_match	3prime_fragment
40977	22.0179	3.24838	1.18885	2.73237	0.0062881	0.182673	PPHLN1	full-splice_match	alternative_3end
72153	20.3058	-1.71597	0.628278	-2.73123	0.00630975	0.183064	SP2-DT	full-splice_match	reference_match
53528	8.36825	4.09137	1.49914	2.72915	0.00634969	0.183985	SRSF5	incomplete-splice_match	3prime_fragment
213181	19.5593	6.38674	2.34082	2.72841	0.00636395	0.18416	HERC1	incomplete-splice_match	3prime_fragment
123946	43.4002	1.4013	0.513809	2.72728	0.0063859	0.184557	HMGB2	full-splice_match	alternative_3end5end
257791	6.14281	5.5589	2.0391	2.72615	0.00640777	0.18495	CTDSPL	full-splice_match	alternative_3end5end
258696	13.276	5.66558	2.07924	2.72483	0.0064335	0.185454	GNL3	full-splice_match	reference_match
16429	13.8688	1.38679	0.509195	2.72349	0.00645962	0.185862	ZNF644	full-splice_match	reference_match
46262	7.26996	-2.18184	0.80119	-2.72325	0.00646426	0.185862	ATXN2	full-splice_match	alternative_3end5end
1172	7.6527	5.45544	2.00401	2.72226	0.0064837	0.186182	DDR1	incomplete-splice_match	3prime_fragment
44207	11.4761	2.59534	0.954042	2.72036	0.00652103	0.187014	RAN	full-splice_match	alternative_3end
64152	10.1693	-4.03267	1.48283	-2.71957	0.00653663	0.187222	LUC7L	incomplete-splice_match	3prime_fragment
144791	11.5806	-3.88322	1.42829	-2.71879	0.00655203	0.187423	TRAPPC14	full-splice_match	alternative_3end5end
145272	8.86728	4.38227	1.61318	2.71655	0.00659668	0.187751	NAMPT	incomplete-splice_match	3prime_fragment
99628	32.8801	2.49369	0.917949	2.71659	0.00659581	0.187751	SNAP25	incomplete-splice_match	3prime_fragment
69908	20.3997	-2.80768	1.03342	-2.71688	0.00659003	0.187751	NPEPPS	incomplete-splice_match	3prime_fragment
13544	6.21155	-4.08525	1.50385	-2.71653	0.006597	0.187751	MIR29B2CHG	incomplete-splice_match	5prime_fragment
147412	21.192	2.65759	0.978506	2.71596	0.0066083	0.187833	SMARCD3	full-splice_match	alternative_5end
92844	7.56241	1.94291	0.716121	2.7131	0.0066656	0.189222	RANBP2	incomplete-splice_match	5prime_fragment
25711	13.1114	8.11863	2.99483	2.71088	0.00671045	0.190254	HK1	incomplete-splice_match	3prime_fragment
285057	21.3475	1.73928	0.642032	2.70903	0.00674812	0.190346	CLU	full-splice_match	alternative_3end5end
65734	14.9516	-0.915992	0.338103	-2.70921	0.00674439	0.190346	ATP6V0D1-DT	full-splice_match	alternative_5end
23624	8.81883	-1.08213	0.399445	-2.70909	0.00674685	0.190346	SVIL-AS1	incomplete-splice_match	5prime_fragment
164157	6.09687	-1.84182	0.679983	-2.70863	0.0067562	0.190346	MOSPD1	full-splice_match	reference_match
79802	5.66866	-2.86001	1.0554	-2.70987	0.00673091	0.190346	NFIX	incomplete-splice_match	5prime_fragment
67062	9.80329	1.44863	0.534949	2.70797	0.00676959	0.190484	ENSG00000280152	full-splice_match	mono-exon
203030	16.6991	3.8586	1.42535	2.70713	0.00678668	0.190571	GCN1	incomplete-splice_match	3prime_fragment
59829	17.2819	-2.42938	0.897447	-2.70699	0.0067897	0.190571	CCPG1	full-splice_match	alternative_3end5end
119427	7.27842	3.12204	1.15358	2.7064	0.00680179	0.190671	ATP8A1	incomplete-splice_match	3prime_fragment
102718	6.77122	-3.14202	1.16114	-2.70597	0.00681059	0.19068	RPS21	incomplete-splice_match	intron_retention
131981	61.2263	2.13214	0.788228	2.70497	0.00683098	0.191012	PDCD6	full-splice_match	alternative_3end
80986	8.55736	-2.70972	1.00218	-2.70384	0.00685439	0.191189	PLPP2	full-splice_match	reference_match
50605	29.6631	-4.84818	1.79298	-2.70398	0.00685143	0.191189	GAS6	full-splice_match	reference_match
102533	7.87322	3.88528	1.43735	2.70308	0.00686992	0.191384	RTF2	full-splice_match	reference_match
33613	15.6004	4.31103	1.59516	2.70257	0.00688059	0.191443	VEGFB	full-splice_match	alternative_3end5end
291211	13.6227	4.82727	1.78744	2.70066	0.00692028	0.19207	PLPPR1	incomplete-splice_match	3prime_fragment
148746	694.201	-1.91669	0.709626	-2.70098	0.00691357	0.19207	MIR124-1HG	full-splice_match	mono-exon
147994	8.79686	3.76069	1.39402	2.69773	0.00698131	0.193524	NPM2	novel_in_catalog	combination_of_known_junctions
33991	5.6301	2.06962	0.767421	2.69685	0.00699986	0.193798	MALAT1	full-splice_match	alternative_5end
190146	6.85242	6.18906	2.29554	2.69612	0.00701518	0.193983	STK32C	full-splice_match	alternative_5end
105632	5.29169	2.90714	1.07953	2.69297	0.00708193	0.195587	EWSR1	incomplete-splice_match	3prime_fragment
145066	15.6919	5.38157	1.99973	2.69115	0.00712056	0.19619	UPK3BL1	incomplete-splice_match	3prime_fragment
111915	5.65238	-3.33761	1.24023	-2.69112	0.00712129	0.19619	THOC7	novel_in_catalog	combination_of_known_junctions
6328	13.3959	-2.44777	0.90994	-2.69004	0.00714443	0.196586	MCRIP1	full-splice_match	reference_match
98841	10.391	1.57225	0.585319	2.68614	0.00722836	0.198068	PID1	full-splice_match	alternative_3end5end
135320	15.9316	-2.14251	0.797557	-2.68635	0.00722384	0.198068	ADGRB3	incomplete-splice_match	5prime_fragment
132634	6.37154	-3.92805	1.46229	-2.68624	0.00722617	0.198068	NQO2	novel_in_catalog	combination_of_known_junctions
435097	54.8848	-5.9766	2.22518	-2.68589	0.00723366	0.198068	SUPT16H	incomplete-splice_match	3prime_fragment
144378	23.7384	-3.18172	1.18491	-2.6852	0.00724854	0.198233	KRIT1	incomplete-splice_match	3prime_fragment
103810	8.84022	-2.82775	1.05379	-2.68342	0.00728733	0.199051	SMIM11	incomplete-splice_match	5prime_fragment
39423	59.4968	-6.04298	2.25294	-2.68226	0.00731268	0.1995	CD9	full-splice_match	alternative_5end
140767	12.0137	4.49985	1.67826	2.68126	0.00733447	0.199851	CCM2	full-splice_match	reference_match
171295	10.6487	7.00679	2.61365	2.68084	0.00734372	0.19986	DYNC1I2	full-splice_match	alternative_5end
86093	13.2547	4.73905	1.76802	2.68043	0.00735271	0.199862	CADM4	incomplete-splice_match	3prime_fragment
158351	7.94083	5.40837	2.01965	2.67787	0.00740918	0.201153	COQ4	novel_in_catalog	combination_of_known_splicesites
25198	5.59834	4.02165	1.50256	2.67654	0.00743869	0.201465	ADK	full-splice_match	alternative_3end5end
267220	5.80954	3.33678	1.24666	2.67659	0.00743763	0.201465	RASA1	incomplete-splice_match	3prime_fragment
122344	41.1546	-4.04423	1.51194	-2.67486	0.00747594	0.20223	BLTP1	incomplete-splice_match	3prime_fragment
254371	10.3974	4.31407	1.61435	2.67233	0.0075326	0.203281	PIK3R4	full-splice_match	alternative_3end
96243	13.1923	1.86089	0.696568	2.67151	0.00755111	0.203281	NCKAP1	incomplete-splice_match	3prime_fragment
145649	16.8947	-3.22902	1.20865	-2.67158	0.0075494	0.203281	GTF2IP1	incomplete-splice_match	3prime_fragment
97240	7.81561	-4.42066	1.65451	-2.67189	0.00754263	0.203281	SATB2	incomplete-splice_match	3prime_fragment
98857	195.765	5.16218	1.93301	2.67054	0.00757293	0.20338	DNER	incomplete-splice_match	3prime_fragment
72914	10.0583	4.11536	1.54099	2.67059	0.00757187	0.20338	ACLY	incomplete-splice_match	3prime_fragment
261076	10.621	3.73042	1.39724	2.66985	0.00758858	0.203556	KLHL5	incomplete-splice_match	3prime_fragment
132195	71.6958	5.64171	2.11541	2.66696	0.00765411	0.204578	ADCY2	incomplete-splice_match	3prime_fragment
52588	88.6989	0.828053	0.310409	2.66762	0.0076391	0.204578	RN7SL1	full-splice_match	mono-exon
113975	7.23133	-3.84233	1.44066	-2.66705	0.00765199	0.204578	CPOX	incomplete-splice_match	3prime_fragment
74979	53.6288	-5.64914	2.11897	-2.66598	0.00767642	0.20493	P4HB	incomplete-splice_match	3prime_fragment
132880	16.7924	3.30794	1.24145	2.66458	0.00770847	0.205541	SERPINB1	full-splice_match	alternative_3end5end
191695	18.0319	-5.08119	1.908	-2.66311	0.00774232	0.206198	CAPRIN1	incomplete-splice_match	internal_fragment
68988	27.7338	2.6042	0.978216	2.6622	0.00776326	0.206265	SAT2	full-splice_match	alternative_5end
63840	54.5548	1.90747	0.7164	2.66257	0.00775455	0.206265	METTL26	full-splice_match	reference_match
113863	10.8178	1.87799	0.705902	2.66042	0.00780438	0.207112	CLDND1	full-splice_match	alternative_3end5end
128960	67.1843	-3.60614	1.35616	-2.65908	0.0078354	0.207689	MATR3	incomplete-splice_match	3prime_fragment
45305	21.5437	3.20554	1.20675	2.65634	0.00789944	0.209139	NAP1L1	incomplete-splice_match	internal_fragment
35151	11.8892	3.54974	1.33681	2.65539	0.00792177	0.209483	TRAPPC4	full-splice_match	alternative_5end
74693	13.0899	-3.72998	1.4055	-2.65384	0.00795815	0.210092	SRP68	incomplete-splice_match	3prime_fragment
288694	6.71507	-4.23874	1.59735	-2.65361	0.00796359	0.210092	KDM4C	full-splice_match	alternative_3end5end
347351	16.2634	4.85693	1.83082	2.65287	0.00798113	0.210308	NPEPPS	incomplete-splice_match	3prime_fragment
235311	14.7571	4.52291	1.70526	2.65232	0.00799401	0.210399	KPTN	full-splice_match	reference_match
74637	14.814	-2.17804	0.821771	-2.65042	0.00803907	0.211337	H3-3B	full-splice_match	alternative_3end
476471	7.2531	5.27223	1.99007	2.64927	0.00806657	0.211811	TESK1	incomplete-splice_match	3prime_fragment
136577	8.26158	-5.04105	1.90343	-2.64841	0.00808717	0.212103	DST	incomplete-splice_match	3prime_fragment
546520	29.6401	-6.53181	2.46916	-2.64536	0.00816038	0.213773	MTOR	incomplete-splice_match	3prime_fragment
13048	32.8945	-0.664563	0.251268	-2.64484	0.00817307	0.213856	TATDN3	incomplete-splice_match	5prime_fragment
111545	55.3096	6.033	2.28167	2.64412	0.00819043	0.21406	CLASP2	incomplete-splice_match	3prime_fragment
50658	9.34484	3.29428	1.24678	2.64224	0.00823605	0.215001	PABPN1	incomplete-splice_match	3prime_fragment
115373	15.5095	1.37121	0.519038	2.64182	0.00824609	0.215013	SCHIP1	full-splice_match	alternative_3end
21351	16.6863	5.36787	2.03321	2.6401	0.00828806	0.215461	CCNL2	incomplete-splice_match	3prime_fragment
86452	24.0299	2.787	1.05571	2.63994	0.00829213	0.215461	NAPA	full-splice_match	alternative_5end
18882	5.50206	-2.6653	1.00931	-2.64072	0.00827294	0.215461	ATAD3A	incomplete-splice_match	3prime_fragment
50221	5.64826	2.90306	1.10053	2.63787	0.00834291	0.216032	TEX30	full-splice_match	reference_match
65456	5.67277	-3.25582	1.23431	-2.63776	0.00834545	0.216032	SF3B3	incomplete-splice_match	3prime_fragment
285971	9.42211	-3.5257	1.33677	-2.63747	0.00835268	0.216032	CLVS1	incomplete-splice_match	3prime_fragment
107047	9.16478	-4.7847	1.81408	-2.63753	0.00835123	0.216032	CSNK1E	novel_not_in_catalog	partial_intron_retention
85922	20.4133	2.16336	0.820711	2.63595	0.0083901	0.216749	SERTAD1	full-splice_match	alternative_3end
194739	7.06571	3.8883	1.47586	2.6346	0.00842361	0.217149	PGM2L1	incomplete-splice_match	3prime_fragment
20966	10.9024	-1.39359	0.528967	-2.63455	0.00842495	0.217149	MIR9-1HG	full-splice_match	reference_match
126708	11.487	2.88579	1.09561	2.63396	0.00843946	0.217268	PLPP1	novel_in_catalog	combination_of_known_junctions
9400	6.30028	-4.21161	1.5992	-2.63358	0.00844898	0.217268	LRRC7	incomplete-splice_match	internal_fragment
154162	7.41595	-2.40443	0.913284	-2.63273	0.00847012	0.217562	RANBP6	full-splice_match	alternative_3end
26203	9.45408	-4.15017	1.57661	-2.63234	0.00847998	0.217565	HNRNPF	full-splice_match	alternative_3end
35380	5.32256	3.56782	1.35578	2.63156	0.00849926	0.217811	ROBO3	incomplete-splice_match	3prime_fragment
5691	18.4856	2.05153	0.780219	2.62943	0.00855285	0.218933	MSRA	full-splice_match	alternative_5end
336173	11.7432	4.6801	1.78067	2.62828	0.00858185	0.219425	MAP4K5	incomplete-splice_match	3prime_fragment
179250	6.93534	3.30861	1.25984	2.62622	0.00863385	0.220393	KCTD3	full-splice_match	alternative_3end5end
39176	27.4413	-1.15027	0.438032	-2.626	0.0086394	0.220393	ENSG00000275367	full-splice_match	mono-exon
162988	3668.61	2.30088	0.876813	2.62414	0.00868686	0.221352	PLP1	full-splice_match	alternative_3end
231085	12.4357	-5.40541	2.06065	-2.62315	0.00871207	0.221742	MATK	incomplete-splice_match	intron_retention
21994	11.6766	2.88208	1.09903	2.62239	0.00873153	0.221985	DNM3	incomplete-splice_match	3prime_fragment
145504	45.1044	4.85035	1.85078	2.62071	0.00877459	0.222827	NSUN5P2	novel_not_in_catalog	novel_exon
226510	5.41591	4.85077	1.85228	2.6188	0.00882392	0.223573	WIPI1	incomplete-splice_match	5prime_fragment
73441	6.41421	3.20678	1.22441	2.61904	0.00881784	0.223573	LIMD2	full-splice_match	alternative_3end
158821	15.3284	1.22968	0.46978	2.61756	0.00885598	0.224031	BRD3OS	full-splice_match	mono-exon
35049	6.40479	-3.63859	1.39019	-2.61733	0.008862	0.224031	ATP5MG	full-splice_match	reference_match
92561	78.9233	5.29018	2.02346	2.61442	0.00893782	0.225438	POU3F3	novel_not_in_catalog	Alt3
92398	11.5546	4.28891	1.64025	2.61479	0.00892814	0.225438	RNF149	incomplete-splice_match	3prime_fragment
271780	5.59429	-3.32105	1.27116	-2.6126	0.00898551	0.226386	PRPF4B	incomplete-splice_match	intron_retention
242422	5.9168	3.51658	1.34693	2.6108	0.00903304	0.227328	MFSD6	incomplete-splice_match	3prime_fragment
120450	6.05827	-4.08278	1.56409	-2.61033	0.00904542	0.227384	SEC24B	incomplete-splice_match	3prime_fragment
141944	7.31253	-1.60871	0.616521	-2.60934	0.00907181	0.227792	ENSG00000244480	full-splice_match	mono-exon
154482	5.45914	-2.49187	0.955196	-2.60876	0.00908714	0.227921	NUDT2	novel_in_catalog	combination_of_known_splicesites
164837	25.0177	-2.04796	0.785778	-2.60628	0.00915327	0.229323	NAA10	full-splice_match	alternative_3end
179772	12.1673	4.14588	1.59334	2.60201	0.00926789	0.231935	ARV1	novel_in_catalog	combination_of_known_splicesites
292936	10.8294	2.65917	1.02241	2.60087	0.00929875	0.232448	novelGene_NTNG2_AS	antisense	multi-exon
87341	51.3885	3.7408	1.43889	2.59979	0.00932815	0.232923	PPP1CB	full-splice_match	alternative_3end5end
118705	20.1497	1.9638	0.756293	2.59662	0.00941472	0.234823	QDPR	full-splice_match	alternative_5end
87780	11.1634	1.4937	0.575371	2.59606	0.00942998	0.234942	YWHAQ	incomplete-splice_match	5prime_fragment
267141	6.80658	4.56712	1.75977	2.59529	0.00945111	0.235207	VCAN	incomplete-splice_match	3prime_fragment
74729	13.7302	3.93088	1.51657	2.59195	0.00954327	0.236577	RNF157	full-splice_match	alternative_3end5end
116092	36.2784	1.94528	0.75038	2.59239	0.00953119	0.236577	PDCD10	full-splice_match	reference_match
90439	29.3897	1.57308	0.6069	2.59199	0.00954239	0.236577	RTN4	incomplete-splice_match	3prime_fragment
28824	9.77131	1.31961	0.509153	2.59177	0.00954842	0.236577	LINC01561	full-splice_match	mono-exon
295453	5.25509	3.52465	1.36083	2.59007	0.00959578	0.236945	FTSJ1	incomplete-splice_match	3prime_fragment
94821	24.0045	3.17905	1.22709	2.59072	0.00957752	0.236945	CXCR4	full-splice_match	reference_match
68991	51.4965	-1.67091	0.645186	-2.58981	0.009603	0.236945	SAT2	incomplete-splice_match	intron_retention
41250	10.3689	-3.37653	1.30382	-2.58971	0.00960558	0.236945	TMBIM6	incomplete-splice_match	3prime_fragment
49432	37.8584	2.70418	1.04448	2.58903	0.00962468	0.237155	SLAIN1	incomplete-splice_match	3prime_fragment
25093	47.4137	1.63379	0.631149	2.5886	0.00963663	0.237188	ANAPC16	novel_in_catalog	combination_of_known_splicesites
73969	62.9132	2.88284	1.11391	2.58803	0.00965262	0.237321	UBALD2	full-splice_match	alternative_3end5end
84655	8.69257	3.01933	1.16693	2.58742	0.0096697	0.23748	PIH1D1	full-splice_match	reference_match
455621	5.55807	-3.80787	1.47224	-2.58644	0.00969719	0.237895	SLCO4A1	incomplete-splice_match	3prime_fragment
81799	14.2523	3.03238	1.17288	2.58543	0.00972587	0.237951	STX10	incomplete-splice_match	intron_retention
258470	5.27419	2.8852	1.116	2.5853	0.00972954	0.237951	TMIE	full-splice_match	alternative_3end5end
138020	6.91762	3.80677	1.47272	2.58485	0.00974201	0.237951	NHSL1-AS1	novel_in_catalog	combination_of_known_junctions
27371	6.51026	-4.60041	1.7797	-2.58493	0.00973992	0.237951	LGI1	full-splice_match	alternative_5end
73748	9.74305	3.2311	1.25085	2.58313	0.00979076	0.238622	ABCA8	incomplete-splice_match	5prime_fragment
7093	10.7815	1.17573	0.455098	2.58346	0.00978157	0.238622	PCDHB15	full-splice_match	mono-exon
293331	5.87779	4.86499	1.88438	2.58175	0.00982997	0.239317	STOM	incomplete-splice_match	3prime_fragment
36187	7.88345	4.3588	1.69006	2.57908	0.00990641	0.240916	SF1	incomplete-splice_match	3prime_fragment
39642	22.8328	3.55176	1.37735	2.5787	0.00991731	0.24092	ETFRF1	full-splice_match	alternative_3end
75022	8.55762	3.36643	1.30596	2.57775	0.00994472	0.241195	SIRT7	full-splice_match	alternative_3end
63154	93.8573	1.05537	0.409445	2.57756	0.00995019	0.241195	SNN	full-splice_match	alternative_3end5end
114007	9.22555	2.65029	1.02838	2.57715	0.00996198	0.24122	IFT57	incomplete-splice_match	3prime_fragment
114459	7.01317	4.64456	1.80362	2.57513	0.0100204	0.241866	PIK3R4	incomplete-splice_match	3prime_fragment
123855	8.76333	1.70645	0.662636	2.57525	0.0100167	0.241866	ENSG00000289249	full-splice_match	mono-exon
78727	33.9545	-2.46701	0.958026	-2.5751	0.010021	0.241866	OAZ1	novel_in_catalog	combination_of_known_junctions,intron_retention
102110	5.90853	-1.79059	0.695509	-2.5745	0.0100385	0.242026	TP53TG5	novel_not_in_catalog	novel_exon
20750	8.25715	-2.41434	0.938131	-2.57357	0.0100657	0.24242	THBS3	full-splice_match	alternative_5end
256176	23.5603	3.99105	1.55132	2.57268	0.0100913	0.242463	TRA2B	full-splice_match	alternative_3end5end
265594	44.5422	2.62074	1.01879	2.57239	0.0100999	0.242463	UBE2QL1	full-splice_match	alternative_3end
110347	18.1803	1.65341	0.642744	2.57242	0.0100991	0.242463	HTD2	full-splice_match	alternative_3end5end
90424	1076.94	-1.73461	0.674443	-2.57192	0.0101138	0.242497	RTN4	full-splice_match	reference_match
71041	11.7034	-3.61539	1.40589	-2.5716	0.010123	0.242497	RHOT1	incomplete-splice_match	3prime_fragment
420526	6.30809	6.07139	2.36635	2.56571	0.0102964	0.243489	RGS4	incomplete-splice_match	3prime_fragment
565752	16.5931	4.94265	1.92567	2.56672	0.0102667	0.243489	HDGFL3	incomplete-splice_match	3prime_fragment
245069	24.3386	4.57383	1.78219	2.5664	0.0102759	0.243489	TRIP12	incomplete-splice_match	intron_retention
5427	9.00004	4.29779	1.67382	2.56766	0.0102389	0.243489	FBXL6	full-splice_match	alternative_5end
61624	9.76318	3.97598	1.54804	2.56839	0.0102171	0.243489	CCP110	incomplete-splice_match	5prime_fragment
137856	108.494	3.73539	1.45487	2.56751	0.0102432	0.243489	SERINC1	incomplete-splice_match	3prime_fragment
269128	27.9734	3.32394	1.29422	2.56829	0.0102203	0.243489	ENSG00000249577	full-splice_match	mono-exon
164768	39.2138	2.75035	1.07209	2.5654	0.0103057	0.243489	CCNQ	full-splice_match	reference_match
136031	21.4407	2.4778	0.964413	2.56923	0.0101925	0.243489	KLHL32	incomplete-splice_match	3prime_fragment
91194	5.33484	2.30718	0.897818	2.56976	0.0101768	0.243489	MRPL53	full-splice_match	alternative_5end
154621	321.028	1.16546	0.45404	2.56688	0.0102619	0.243489	DNAJA1	full-splice_match	alternative_3end5end
154635	13.3351	-1.52612	0.594807	-2.56574	0.0102956	0.243489	RECK	incomplete-splice_match	5prime_fragment
106979	10.8408	-1.8852	0.734239	-2.56756	0.0102417	0.243489	PI4KAP1	full-splice_match	alternative_5end
90614	7.86977	3.38202	1.31942	2.56326	0.0103695	0.244108	PPP4R3B	novel_not_in_catalog	Alt3
16503	5.84006	3.29275	1.28467	2.56312	0.0103737	0.244108	TTLL7	incomplete-splice_match	3prime_fragment
20762	13.0604	3.08207	1.20235	2.56337	0.010366	0.244108	GBA1	incomplete-splice_match	3prime_fragment
213878	6.50767	2.57704	1.00546	2.56306	0.0103755	0.244108	NEO1	incomplete-splice_match	5prime_fragment
19350	28.8183	0.806168	0.31476	2.56122	0.0104306	0.245146	BOLA1	full-splice_match	reference_match
1431	36.7461	4.16836	1.62806	2.56032	0.0104575	0.245263	TUBB	full-splice_match	alternative_3end5end
97845	58.9412	-2.22497	0.868984	-2.56042	0.0104545	0.245263	ANKZF1	incomplete-splice_match	3prime_fragment
227732	5.2967	-3.26478	1.27568	-2.55925	0.0104898	0.245764	ELP2	full-splice_match	reference_match
137644	11.6737	1.69283	0.661662	2.55845	0.0105139	0.246071	TUBE1	incomplete-splice_match	5prime_fragment
107299	10.8747	2.54243	0.994095	2.55753	0.0105417	0.246465	PMM1	full-splice_match	reference_match
113862	11.8795	2.76316	1.08097	2.55618	0.0105828	0.246699	CLDND1	full-splice_match	alternative_3end5end
75209	93.8082	2.49649	0.97681	2.55575	0.0105958	0.246699	RAB40B	full-splice_match	mono-exon
17611	18.4893	-3.64883	1.42728	-2.55649	0.0105736	0.246699	PSRC1	novel_in_catalog	combination_of_known_junctions,intron_retention
42140	9.84667	-3.96818	1.55244	-2.55609	0.0105855	0.246699	MCRS1	full-splice_match	alternative_3end5end
263844	5.43295	4.89306	1.91567	2.55423	0.0106424	0.247527	SEC24D	incomplete-splice_match	3prime_fragment
133730	8.67217	4.49849	1.7616	2.55363	0.0106605	0.247691	TDP2	incomplete-splice_match	3prime_fragment
262282	5.42603	4.25932	1.66874	2.55241	0.0106979	0.248042	G3BP2	incomplete-splice_match	3prime_fragment
30816	7.27904	3.8923	1.52624	2.55026	0.0107642	0.248042	ARL14EP	incomplete-splice_match	3prime_fragment
56112	8.57941	3.79776	1.48828	2.55177	0.0107176	0.248042	CRIP2	full-splice_match	alternative_3end
56910	48.1573	2.2582	0.885065	2.55146	0.0107274	0.248042	TYRO3	full-splice_match	mono-exon
90701	10.3145	1.99552	0.782173	2.55125	0.0107337	0.248042	BCL11A	incomplete-splice_match	3prime_fragment
34500	17.6857	1.05307	0.412574	2.55243	0.0106974	0.248042	NADSYN1	full-splice_match	mono-exon
129945	49.7879	3.54982	1.39161	2.55087	0.0107453	0.248042	MACROH2A1	novel_in_catalog	combination_of_known_junctions
366632	19.4129	-4.21151	1.65139	-2.55029	0.0107635	0.248042	C2orf72	full-splice_match	alternative_3end5end
23661	11.8225	3.43453	1.34694	2.54989	0.0107758	0.248054	ATP5F1C	full-splice_match	alternative_5end
116632	8.13491	-2.31687	0.909179	-2.54831	0.0108246	0.248921	EIF4A2	full-splice_match	alternative_3end
75200	7.64488	3.70944	1.45619	2.54736	0.010854	0.249342	WDR45B	incomplete-splice_match	5prime_fragment
513187	5.76156	5.91981	2.32683	2.54415	0.0109545	0.251393	GTF2IP4	incomplete-splice_match	3prime_fragment
35966	6.41827	-3.28473	1.29154	-2.54326	0.0109823	0.251772	NXF1	full-splice_match	alternative_3end5end
249751	12.2012	-3.27619	1.29006	-2.53956	0.0110991	0.25419	RSPH1	incomplete-splice_match	3prime_fragment
28138	30.7479	4.61893	1.81946	2.53863	0.0111287	0.254608	MMS19	incomplete-splice_match	3prime_fragment
248987	5.23077	3.8712	1.52579	2.53718	0.011175	0.254911	APP	incomplete-splice_match	3prime_fragment
73784	7.33296	2.81897	1.11108	2.53714	0.0111761	0.254911	ABCA6	incomplete-splice_match	5prime_fragment
59840	39.0168	-1.3925	0.548742	-2.53763	0.0111607	0.254911	CCPG1	incomplete-splice_match	5prime_fragment
317354	9.40256	3.73806	1.47372	2.53649	0.011197	0.255128	LGI1	full-splice_match	alternative_3end
108764	7.64962	2.69986	1.06492	2.53526	0.0112363	0.255764	VGLL4	full-splice_match	alternative_3end
145648	44.5502	-2.74972	1.08489	-2.53456	0.0112587	0.256013	GTF2IP1	incomplete-splice_match	3prime_fragment
243264	32.3938	2.87226	1.1335	2.53396	0.0112781	0.256193	TMEFF2	full-splice_match	alternative_3end
62080	7.43967	4.07665	1.6107	2.53099	0.0113742	0.257854	EIF3C	incomplete-splice_match	3prime_fragment
73338	7.75919	1.22674	0.484661	2.53113	0.0113696	0.257854	RPL32P32	full-splice_match	mono-exon
136038	11.2829	2.07368	0.819626	2.53003	0.0114052	0.258296	NCOA7	novel_in_catalog	combination_of_known_junctions
124086	7.96299	5.95404	2.35439	2.52891	0.0114417	0.258861	TRAPPC11	full-splice_match	alternative_5end
66886	10.2812	2.34885	0.929303	2.52753	0.0114867	0.259616	VAC14	full-splice_match	mono-exon
73851	27.7065	-1.21252	0.479807	-2.5271	0.0115009	0.259675	ABCA5	incomplete-splice_match	5prime_fragment
14892	8.68473	4.01845	1.59137	2.52516	0.0115647	0.260262	TP53BP2	incomplete-splice_match	3prime_fragment
289123	11.7664	2.92946	1.16023	2.52489	0.0115734	0.260262	PSIP1	incomplete-splice_match	3prime_fragment
101755	11.1375	0.826896	0.327486	2.52498	0.0115705	0.260262	MMP24OS	full-splice_match	mono-exon
128720	17.3199	-1.85386	0.734168	-2.52512	0.0115659	0.260262	CAMLG	full-splice_match	alternative_3end
72423	19.208	2.35164	0.931545	2.52445	0.0115881	0.26033	IFT20	full-splice_match	alternative_3end
105623	11.897	6.18136	2.45026	2.52274	0.0116446	0.261167	EWSR1	incomplete-splice_match	3prime_fragment
292613	14.2901	5.58388	2.21353	2.52261	0.0116486	0.261167	ELP1	incomplete-splice_match	3prime_fragment
78789	16.6166	4.0589	1.60953	2.5218	0.0116758	0.261514	GNA11	full-splice_match	alternative_3end5end
171679	10.5762	4.90462	1.94615	2.52016	0.0117301	0.262206	IARS1	incomplete-splice_match	3prime_fragment
142225	5.57806	-4.50351	1.78696	-2.52021	0.0117285	0.262206	AMPH	incomplete-splice_match	3prime_fragment
120182	10.0532	-0.990557	0.39318	-2.51935	0.0117572	0.26255	LINC02232	incomplete-splice_match	5prime_fragment
14735	8.3836	3.75427	1.4911	2.51779	0.0118095	0.263455	AIDA	incomplete-splice_match	3prime_fragment
26949	16.5995	-2.56344	1.01839	-2.51717	0.0118303	0.263658	ANXA7	incomplete-splice_match	3prime_fragment
14891	6.55017	4.74823	1.88702	2.51625	0.0118611	0.263698	TP53BP2	incomplete-splice_match	3prime_fragment
18838	29.7688	-1.12384	0.446789	-2.51536	0.011891	0.263698	VPS13D	incomplete-splice_match	5prime_fragment
87577	64.4257	-1.57678	0.626751	-2.51579	0.0118765	0.263698	FKBP1B	full-splice_match	alternative_5end
297839	11.6994	4.62923	1.84013	2.51571	0.0118793	0.263698	IDH3G	novel_in_catalog	combination_of_known_splicesites
395483	7.10369	-5.20181	2.06713	-2.51645	0.0118545	0.263698	QKI	incomplete-splice_match	3prime_fragment
23096	6.6034	3.86322	1.53611	2.51494	0.0119053	0.263755	MAD2L2	full-splice_match	alternative_3end
20351	82.6049	1.58858	0.631956	2.51374	0.0119457	0.264387	ENSA	full-splice_match	alternative_3end
75731	41.1017	-1.00948	0.401999	-2.51115	0.0120337	0.266073	PSMG2	full-splice_match	alternative_5end
245289	12.3139	4.83265	1.92532	2.51005	0.0120715	0.266645	D2HGDH	incomplete-splice_match	3prime_fragment
52115	13.294	-1.07517	0.428504	-2.50912	0.0121033	0.267084	NOVA1	incomplete-splice_match	5prime_fragment
12840	22.334	-4.77549	1.90419	-2.50788	0.0121458	0.267758	CDK18	incomplete-splice_match	3prime_fragment
136706	40.3812	2.18958	0.8733	2.50725	0.0121675	0.267972	ADGRB3-DT	novel_in_catalog	combination_of_known_junctions,intron_retention
50259	6.41607	-2.01417	0.803476	-2.50682	0.0121822	0.268033	LINC00551	incomplete-splice_match	5prime_fragment
66524	6.04375	2.77773	1.10925	2.50416	0.0122743	0.269793	CNOT1	incomplete-splice_match	3prime_fragment
592354	14.6481	6.27654	2.50764	2.50297	0.0123156	0.270437	ARMC6	incomplete-splice_match	3prime_fragment
480628	11.2721	5.8855	2.35239	2.50192	0.0123522	0.270974	HTATSF1	incomplete-splice_match	3prime_fragment
67090	6.13972	-2.65832	1.06276	-2.50132	0.012373	0.271164	TMEM170A	full-splice_match	alternative_3end
55920	5.98072	3.3734	1.34916	2.50037	0.0124063	0.271311	MOK	full-splice_match	alternative_3end5end
103141	12.0537	-0.94629	0.378502	-2.50009	0.012416	0.271311	LKAAEAR1	full-splice_match	reference_match
153386	29.2635	-4.18503	1.67391	-2.50015	0.012414	0.271311	PUF60	full-splice_match	reference_match
76484	8.92703	1.95703	0.783557	2.49762	0.0125031	0.272733	MAPRE2	incomplete-splice_match	5prime_fragment
39109	17.2367	-1.73276	0.693782	-2.49755	0.0125054	0.272733	C12orf57	full-splice_match	alternative_5end
422186	11.9805	5.32309	2.13228	2.49643	0.0125452	0.273334	KIAA0319L	incomplete-splice_match	3prime_fragment
58163	10.8734	-3.93069	1.57496	-2.49575	0.0125692	0.273591	SCG3	incomplete-splice_match	3prime_fragment
120861	5.9232	1.21015	0.485049	2.4949	0.0125993	0.273941	HSP90AB3P	full-splice_match	mono-exon
131331	39.508	-0.760366	0.304804	-2.4946	0.0126098	0.273941	TRIM7-AS2	full-splice_match	reference_match
341193	8.63209	4.87158	1.95468	2.49226	0.0126932	0.275487	NTRK3	incomplete-splice_match	3prime_fragment
130016	9.68797	1.99053	0.799208	2.49062	0.0127519	0.276493	FAM13B	incomplete-splice_match	5prime_fragment
285493	12.9012	4.01086	1.61131	2.48919	0.0128035	0.277344	SLC20A2	incomplete-splice_match	3prime_fragment
97526	13.3891	3.38787	1.36248	2.48655	0.012899	0.279142	C2orf80	novel_in_catalog	combination_of_known_junctions
94597	201.764	2.91123	1.17104	2.48603	0.0129176	0.279274	BIN1	incomplete-splice_match	3prime_fragment
252938	55.1725	6.24156	2.51237	2.48433	0.0129795	0.279722	CPOX	full-splice_match	alternative_5end
49835	17.3826	2.97262	1.19723	2.48293	0.0130308	0.279722	MBNL2	incomplete-splice_match	3prime_fragment
108572	6.06542	2.15624	0.868547	2.48259	0.0130433	0.279722	CRBN	incomplete-splice_match	5prime_fragment
76734	15.6941	1.82136	0.733045	2.48464	0.0129681	0.279722	SLC39A6	incomplete-splice_match	3prime_fragment
11901	11.6966	1.20895	0.486731	2.48381	0.0129984	0.279722	PTP4A2	incomplete-splice_match	intron_retention
23670	14.4021	-0.678665	0.273328	-2.48297	0.0130291	0.279722	ATP5F1C	full-splice_match	alternative_3end5end
11778	21.9559	5.00425	2.0152	2.48325	0.013019	0.279722	PTP4A2	novel_in_catalog	combination_of_known_junctions
131704	22.7415	-2.71256	1.09173	-2.48464	0.0129681	0.279722	RAB24	novel_in_catalog	combination_of_known_junctions,intron_retention
126103	8.0647	-3.48723	1.40479	-2.48238	0.0130507	0.279722	BDP1	incomplete-splice_match	5prime_fragment
41630	46.47	0.880494	0.354788	2.48175	0.013074	0.279954	HNRNPA1	full-splice_match	reference_match
31620	6.13294	3.96912	1.59966	2.48123	0.0130931	0.280095	RNH1	novel_in_catalog	combination_of_known_splicesites
151491	5.71095	4.29282	1.7309	2.48011	0.0131341	0.280704	LAPTM4B	incomplete-splice_match	3prime_fragment
134482	2370.35	0.822301	0.331603	2.47977	0.0131466	0.280704	7SK	full-splice_match	mono-exon
59757	5.5726	3.52432	1.42293	2.47681	0.0132564	0.281172	MYO5A	incomplete-splice_match	3prime_fragment
81483	13.1379	3.34351	1.34916	2.47822	0.0132041	0.281172	YIPF2	full-splice_match	alternative_3end
221273	7.54125	3.30941	1.33543	2.47816	0.0132062	0.281172	ALDH3A2	incomplete-splice_match	3prime_fragment
96856	23.25	-0.707957	0.285828	-2.47686	0.0132543	0.281172	ABI2	incomplete-splice_match	5prime_fragment
85324	5.34603	-1.209	0.487995	-2.47749	0.0132309	0.281172	ZNF470-DT	full-splice_match	mono-exon
60449	30.4583	-2.66832	1.07685	-2.47788	0.0132164	0.281172	MAN2C1	incomplete-splice_match	intron_retention
222072	8.12162	-6.64617	2.68292	-2.47721	0.0132412	0.281172	NPEPPS	incomplete-splice_match	3prime_fragment
70340	11.4033	2.86586	1.15781	2.47525	0.0133144	0.282134	DHX40	incomplete-splice_match	3prime_fragment
213799	14.3209	2.53744	1.027	2.47074	0.0134835	0.284909	ICE2	incomplete-splice_match	3prime_fragment
143824	26.9209	2.45621	0.994001	2.47103	0.0134723	0.284909	TAC1	full-splice_match	alternative_3end5end
78729	18.223	2.32936	0.942546	2.47135	0.0134606	0.284909	OAZ1	full-splice_match	alternative_3end
25028	7.47953	-1.55538	0.629631	-2.4703	0.0135	0.284937	ZNF487	novel_in_catalog	combination_of_known_splicesites
159732	6.90707	-2.93935	1.19001	-2.47003	0.0135103	0.284937	TOR2A	full-splice_match	alternative_3end
25216	11.989	-0.881117	0.356907	-2.46876	0.0135583	0.285664	KAT6B	incomplete-splice_match	5prime_fragment
31788	86.3904	-4.36795	1.76952	-2.46844	0.0135703	0.285664	EIF4G2	incomplete-splice_match	3prime_fragment
121266	6.19627	4.96333	2.01116	2.46789	0.0135912	0.285837	RCHY1	incomplete-splice_match	3prime_fragment
603367	25.6757	6.63469	2.69016	2.46628	0.0136524	0.286429	LARS1	incomplete-splice_match	3prime_fragment
21592	13.4506	3.64673	1.4784	2.46668	0.0136373	0.286429	NDUFS2	full-splice_match	alternative_5end
158906	23.6316	-1.6526	0.670115	-2.46614	0.0136577	0.286429	TMEM141	full-splice_match	alternative_3end5end
78655	12.186	3.14798	1.27678	2.46556	0.01368	0.286628	IZUMO4	novel_not_in_catalog	Alt3
56002	6.1987	-1.09742	0.445299	-2.46445	0.0137224	0.287248	CKB	full-splice_match	alternative_3end
134580	9.67387	1.75627	0.713043	2.46306	0.0137756	0.288035	ILRUN	full-splice_match	alternative_3end5end
4382	11.9908	-1.36145	0.552804	-2.4628	0.0137857	0.288035	SURF1	full-splice_match	alternative_5end
135687	9.19845	-1.02349	0.415779	-2.46162	0.013831	0.288712	SLC35A1	incomplete-splice_match	5prime_fragment
255876	5.94244	4.93976	2.00871	2.45917	0.013926	0.290153	SENP2	incomplete-splice_match	3prime_fragment
76860	19.1556	-1.56115	0.634815	-2.45923	0.0139236	0.290153	SLC14A1	incomplete-splice_match	5prime_fragment
80282	15.1749	2.82189	1.14772	2.45869	0.0139444	0.290267	COPE	full-splice_match	alternative_3end
160073	5.3101	5.07857	2.06733	2.45659	0.0140264	0.290892	MED22	full-splice_match	alternative_3end5end
42793	11.3152	4.96649	2.02157	2.45675	0.0140202	0.290892	R3HDM2	incomplete-splice_match	3prime_fragment
56029	43.2883	1.92635	0.784152	2.4566	0.014026	0.290892	ATP5MJ	full-splice_match	alternative_3end
229637	11.7482	-3.94173	1.60453	-2.45662	0.0140252	0.290892	SAFB	incomplete-splice_match	3prime_fragment
16942	5.4919	-4.45416	1.81365	-2.45591	0.014053	0.291173	CEPT1	incomplete-splice_match	3prime_fragment
452778	25.4842	6.62452	2.70019	2.45335	0.0141532	0.292471	ITPRID2	incomplete-splice_match	3prime_fragment
45551	10.2842	-1.36096	0.55482	-2.45298	0.0141678	0.292471	ENSG00000258185	incomplete-splice_match	5prime_fragment
224764	7.23059	-4.38254	1.78629	-2.45343	0.01415	0.292471	SPAG9	incomplete-splice_match	3prime_fragment
177063	8.82438	-4.71838	1.92347	-2.45306	0.0141647	0.292471	DDOST	incomplete-splice_match	3prime_fragment
145050	20.6291	5.26895	2.14859	2.45228	0.0141953	0.292767	RASA4	incomplete-splice_match	3prime_fragment
142410	410.804	0.827133	0.337345	2.45189	0.0142108	0.292819	HSPB1	full-splice_match	alternative_5end
59099	36.5333	-5.28106	2.15417	-2.45155	0.0142241	0.292823	RMDN3	full-splice_match	alternative_3end5end
114219	80.9939	2.55683	1.04333	2.45066	0.0142596	0.293047	MYLK	full-splice_match	alternative_3end5end
150371	10.4294	-0.984908	0.401902	-2.45062	0.0142611	0.293047	YTHDF3-DT	full-splice_match	mono-exon
614991	32.8856	-5.87683	2.39903	-2.44967	0.0142987	0.293549	UBE2Q1	incomplete-splice_match	3prime_fragment
205687	6.90481	2.32	0.948216	2.4467	0.0144172	0.295149	FBXL3	incomplete-splice_match	3prime_fragment
61066	6.92139	2.12726	0.869263	2.4472	0.014397	0.295149	PARP6	full-splice_match	alternative_5end
68148	33.9445	1.72656	0.705824	2.44617	0.0144383	0.295149	SNHG29	full-splice_match	alternative_3end5end
137528	14.0709	-1.07727	0.440408	-2.44607	0.0144425	0.295149	WASF1	incomplete-splice_match	5prime_fragment
290696	8.71045	-5.11454	2.0906	-2.44644	0.0144273	0.295149	UBQLN1	incomplete-splice_match	3prime_fragment
264531	6.59394	-4.12541	1.68784	-2.44419	0.0145178	0.296417	TMEM144	incomplete-splice_match	5prime_fragment
101485	10.777	2.651	1.08527	2.44271	0.0145776	0.297366	ZFAS1	full-splice_match	reference_match
95991	5.52236	-1.04652	0.428548	-2.44202	0.0146055	0.297665	WDR75	incomplete-splice_match	5prime_fragment
119333	6.73463	3.78921	1.55249	2.44073	0.0146574	0.298451	ARAP2	incomplete-splice_match	internal_fragment
13262	17.5275	-2.55164	1.04564	-2.44028	0.014676	0.298558	TNNT2	incomplete-splice_match	3prime_fragment
75001	10.3171	1.2255	0.502294	2.4398	0.0146952	0.298678	ENSG00000263731	full-splice_match	mono-exon
114095	7.91793	2.54866	1.04512	2.43862	0.0147434	0.29907	NEPRO	incomplete-splice_match	5prime_fragment
74967	6.18005	-1.55599	0.63811	-2.43844	0.0147508	0.29907	MCRIP1	full-splice_match	reference_match
46732	13.8037	-3.79971	1.55831	-2.43835	0.0147546	0.29907	ANAPC5	incomplete-splice_match	intron_retention
142742	17.8348	2.41909	0.992329	2.43779	0.0147774	0.299263	SBDSP1	full-splice_match	reference_match
49358	42.2439	2.60612	1.06922	2.43742	0.0147926	0.2993	PCDH17	full-splice_match	alternative_3end5end
29088	11.1427	4.36526	1.79164	2.43646	0.0148318	0.299354	ZRANB1	incomplete-splice_match	3prime_fragment
92350	10.0447	2.58632	1.06129	2.43697	0.0148109	0.299354	REV1	incomplete-splice_match	5prime_fragment
149200	48.5586	-4.67831	1.92019	-2.43637	0.0148354	0.299354	PPP2CB	incomplete-splice_match	3prime_fragment
113191	7.8839	-1.43912	0.59079	-2.43592	0.0148539	0.299458	PAQR9-AS1	novel_not_in_catalog	novel_exon
154572	14.3605	2.67731	1.09971	2.43455	0.0149102	0.300128	CCDC107	novel_not_in_catalog	Alt3
135097	112.723	1.08763	0.446766	2.43446	0.0149139	0.300128	NUDT3	full-splice_match	alternative_3end
470670	8.8274	4.56698	1.87829	2.43146	0.0150382	0.302357	FSCN1	incomplete-splice_match	3prime_fragment
3303	8.99751	-3.95456	1.62746	-2.42989	0.0151034	0.303396	NMRAL1	full-splice_match	reference_match
73512	501.199	2.3344	0.961079	2.42893	0.0151434	0.303925	DDX5	incomplete-splice_match	3prime_fragment
63915	48.2809	4.47759	1.84444	2.42762	0.0151983	0.304447	CIAO3	full-splice_match	alternative_3end5end
163276	29.3026	0.760404	0.313267	2.42734	0.0152101	0.304447	ENSG00000290908	full-splice_match	mono-exon
148915	127.014	-0.62522	0.257514	-2.4279	0.0151863	0.304447	ASAH1	full-splice_match	alternative_3end
145767	5.29263	1.61209	0.664265	2.42688	0.0152294	0.304561	POMZP3	incomplete-splice_match	5prime_fragment
106496	25.6186	-2.77464	1.14347	-2.4265	0.0152451	0.304603	DGCR6L	full-splice_match	alternative_3end
133933	5.78422	2.6538	1.09408	2.4256	0.0152832	0.30482	SRSF3	incomplete-splice_match	3prime_fragment
89794	5.68131	-3.47236	1.43143	-2.42579	0.015275	0.30482	HNRNPLL	incomplete-splice_match	3prime_fragment
18245	5.58431	2.27093	0.93667	2.42447	0.0153306	0.305494	SFN	full-splice_match	mono-exon
183645	22.2722	7.24227	2.98816	2.42366	0.0153651	0.305909	NCDN	incomplete-splice_match	3prime_fragment
217633	9.94054	6.72287	2.77459	2.42301	0.0153923	0.306179	GGA2	incomplete-splice_match	3prime_fragment
10487	6.36299	-1.75924	0.726153	-2.42269	0.0154063	0.306184	RNF220	incomplete-splice_match	5prime_fragment
55919	11.1204	4.38941	1.81247	2.42178	0.0154446	0.306673	MOK	incomplete-splice_match	3prime_fragment
102534	11.3896	-2.27265	0.938674	-2.42113	0.0154725	0.306956	RTF2	full-splice_match	alternative_5end
141239	6.98656	1.82988	0.755938	2.42068	0.0154915	0.307061	ANLN	full-splice_match	alternative_3end
210265	7.87944	4.44019	1.83614	2.41822	0.0155965	0.308869	FOXN3	incomplete-splice_match	3prime_fragment
26130	6.86043	3.33005	1.37788	2.4168	0.0156576	0.309352	TMEM273	full-splice_match	reference_match
22803	7.41892	1.77541	0.734644	2.41669	0.0156623	0.309352	TOR1AIP2	incomplete-splice_match	5prime_fragment
132955	11.4019	1.08065	0.447149	2.41675	0.0156596	0.309352	TMEM14B	novel_in_catalog	combination_of_known_splicesites
42884	6.76278	3.40626	1.4104	2.41511	0.0157305	0.309674	B4GALNT1	full-splice_match	alternative_5end
342639	5.46863	-3.48665	1.44356	-2.41531	0.0157219	0.309674	MARF1	full-splice_match	alternative_3end5end
260302	22.3865	-4.43181	1.8351	-2.41503	0.015734	0.309674	MAN2B2	incomplete-splice_match	3prime_fragment
173829	15.0631	-4.49275	1.86021	-2.41518	0.0157274	0.309674	GPR89B	incomplete-splice_match	3prime_fragment
59772	164.445	2.64001	1.09344	2.41441	0.0157607	0.309928	ARPP19	full-splice_match	alternative_3end5end
79868	5.77799	2.08597	0.865437	2.41031	0.0159392	0.313163	C19orf53	full-splice_match	alternative_3end5end
97567	19.4023	1.91288	0.793855	2.40961	0.0159694	0.313481	GCSHP3	full-splice_match	mono-exon
399163	9.45772	4.84341	2.01199	2.40727	0.0160722	0.315224	ELAPOR2	incomplete-splice_match	3prime_fragment
106699	12.0571	2.57241	1.06874	2.40695	0.0160865	0.315229	LRRC75B	full-splice_match	alternative_5end
67405	16.213	5.47328	2.27938	2.40122	0.0163406	0.315964	TAF1C	incomplete-splice_match	3prime_fragment
61287	12.3262	4.95483	2.06014	2.4051	0.0161681	0.315964	PCSK6	incomplete-splice_match	5prime_fragment
296141	21.2631	4.904	2.04214	2.40141	0.0163322	0.315964	LAS1L	incomplete-splice_match	3prime_fragment
453384	8.88181	3.87477	1.61411	2.40056	0.0163702	0.315964	TMEFF2	incomplete-splice_match	3prime_fragment
62887	17.4852	2.93405	1.22201	2.401	0.0163505	0.315964	RHBDL1	full-splice_match	reference_match
49598	48.7562	2.59516	1.08011	2.40267	0.0162757	0.315964	MYCBP2	incomplete-splice_match	3prime_fragment
164845	7.38926	1.8427	0.767541	2.40078	0.0163601	0.315964	RENBP	incomplete-splice_match	5prime_fragment
150421	12.6809	1.32935	0.552968	2.40404	0.0162152	0.315964	SNHG6	full-splice_match	reference_match
152648	37.5217	1.19083	0.495596	2.40282	0.016269	0.315964	LRATD2	full-splice_match	mono-exon
52212	10.1341	1.17154	0.488117	2.40013	0.0163892	0.315964	CLEC14A	full-splice_match	mono-exon
102839	13.8886	1.02751	0.427912	2.40122	0.0163406	0.315964	MHENCR	full-splice_match	mono-exon
153090	24.9027	0.983237	0.408795	2.40521	0.0161632	0.315964	ENSG00000259891	full-splice_match	mono-exon
75732	8.66597	-1.2153	0.505299	-2.40511	0.0161676	0.315964	PSMG2	full-splice_match	alternative_3end
96749	6.30955	-1.49272	0.621261	-2.40273	0.0162733	0.315964	STRADB	incomplete-splice_match	5prime_fragment
73100	7.78024	-2.0799	0.866602	-2.40007	0.0163921	0.315964	SRSF1	incomplete-splice_match	3prime_fragment
63843	38.0223	-2.27177	0.945635	-2.40238	0.0162889	0.315964	METTL26	incomplete-splice_match	3prime_fragment
78018	36.5917	-3.17352	1.3201	-2.404	0.0162166	0.315964	SLC66A2	full-splice_match	alternative_3end
22889	74.7926	-3.29774	1.37289	-2.40204	0.0163038	0.315964	CHD5	incomplete-splice_match	5prime_fragment
66304	37.2357	-6.59297	2.74573	-2.40117	0.0163428	0.315964	ITFG1	incomplete-splice_match	3prime_fragment
46831	6.28275	-3.40587	1.41936	-2.39958	0.0164141	0.316116	RSRC2	incomplete-splice_match	3prime_fragment
37786	10.3869	2.05535	0.857629	2.39655	0.0165502	0.318463	SIK3	incomplete-splice_match	5prime_fragment
133922	6.33565	3.8297	1.59919	2.39477	0.0166307	0.319603	SRSF3	full-splice_match	alternative_3end
83690	6.87528	3.64846	1.52361	2.39461	0.016638	0.319603	RBM42	incomplete-splice_match	3prime_fragment
124870	13.9243	1.68082	0.702082	2.39405	0.0166633	0.319699	LIFR	incomplete-splice_match	5prime_fragment
149540	11.8	1.26803	0.529907	2.39293	0.0167143	0.319699	SLC20A2	incomplete-splice_match	5prime_fragment
61912	12.7959	-0.991404	0.414166	-2.39373	0.0166779	0.319699	TNRC6A	incomplete-splice_match	5prime_fragment
69388	40.6045	-2.05237	0.857477	-2.3935	0.0166883	0.319699	NCOR1	full-splice_match	alternative_3end5end
55187	10.1434	1.80234	0.753133	2.39312	0.0167057	0.319699	EIF5	novel_in_catalog	combination_of_known_junctions
8314	28.9811	2.81735	1.17769	2.39226	0.0167449	0.320011	CAPZB	full-splice_match	reference_match
114050	5.79988	1.80411	0.754463	2.39125	0.016791	0.320617	ATG3	full-splice_match	alternative_5end
260588	5.41458	4.38853	1.83561	2.39077	0.0168131	0.320766	RBPJ	incomplete-splice_match	3prime_fragment
21302	15.2049	6.58362	2.75554	2.38923	0.0168839	0.320969	ACAP3	incomplete-splice_match	3prime_fragment
64879	1939.26	1.19403	0.499772	2.38916	0.0168872	0.320969	MT2A	full-splice_match	alternative_5end
23617	20.5635	0.845823	0.354053	2.38898	0.0168954	0.320969	SVIL-AS1	full-splice_match	alternative_3end
26443	70.1719	-1.90639	0.797629	-2.39007	0.0168452	0.320969	ANK3	full-splice_match	alternative_3end5end
90669	17.1781	-2.82228	1.18121	-2.3893	0.0168805	0.320969	FANCL	incomplete-splice_match	3prime_fragment
190329	6.72505	2.44851	1.02554	2.38753	0.0169621	0.321645	ENSG00000279672	full-splice_match	mono-exon
61704	7.34963	2.13305	0.893812	2.38646	0.0170113	0.321645	LYRM1	full-splice_match	reference_match
157953	63.825	1.47157	0.616274	2.38786	0.016947	0.321645	ENSG00000284976	full-splice_match	mono-exon
65823	12.6757	0.713248	0.298927	2.38603	0.0170315	0.321645	CMIP	incomplete-splice_match	5prime_fragment
85223	7.70721	3.4745	1.45607	2.38623	0.0170223	0.321645	ALKBH6	novel_in_catalog	combination_of_known_junctions,intron_retention
38137	11.7012	-3.30354	1.38425	-2.38653	0.0170084	0.321645	SIAE	incomplete-splice_match	3prime_fragment
29059	21.8947	-4.08775	1.71315	-2.3861	0.0170281	0.321645	LHPP	full-splice_match	reference_match
164002	5.41454	-3.19465	1.33984	-2.38435	0.0171093	0.322843	LAMP2	incomplete-splice_match	3prime_fragment
66753	20.4611	-1.59817	0.670449	-2.38373	0.0171384	0.323119	PSMB10	incomplete-splice_match	intron_retention
397566	7.57649	3.06091	1.28472	2.38255	0.0171933	0.323883	POLD2	full-splice_match	alternative_5end
23382	9.00141	-2.64275	1.11001	-2.38085	0.0172729	0.325108	PFKP	incomplete-splice_match	3prime_fragment
51358	34.3091	4.0782	1.71538	2.37743	0.017434	0.327864	CHD8	incomplete-splice_match	3prime_fragment
358982	5.8837	4.05255	1.7053	2.37645	0.0174802	0.328457	NCOA1	incomplete-splice_match	3prime_fragment
49716	5.37164	2.98335	1.25602	2.37524	0.0175376	0.32874	SPRY2	full-splice_match	alternative_3end5end
79840	8.19736	2.22293	0.93589	2.3752	0.0175393	0.32874	PWWP3A	full-splice_match	alternative_5end
89588	14.2848	-0.716515	0.301639	-2.37541	0.0175295	0.32874	COMMD1	full-splice_match	alternative_3end5end
10452	11.3991	4.79155	2.01887	2.37338	0.0176261	0.330091	DMAP1	full-splice_match	reference_match
219429	28.2479	4.51346	1.90227	2.37268	0.0176597	0.330445	AARS1	incomplete-splice_match	3prime_fragment
40199	16.9166	2.13555	0.900797	2.37073	0.017753	0.331912	LMO3	incomplete-splice_match	3prime_fragment
246815	17.3893	6.08252	2.56638	2.37008	0.0177842	0.332219	AHCY	full-splice_match	reference_match
64909	42.7689	1.74389	0.735981	2.36948	0.0178132	0.332484	MT1F	full-splice_match	alternative_5end
481534	8.13601	5.42031	2.28964	2.36732	0.0179173	0.332502	INTS3	incomplete-splice_match	5prime_fragment
179431	14.1424	5.34405	2.25772	2.36701	0.0179324	0.332502	IARS2	incomplete-splice_match	3prime_fragment
190980	13.7889	4.47439	1.89041	2.36689	0.0179384	0.332502	ADM	full-splice_match	reference_match
31956	48.884	4.02158	1.69946	2.36639	0.0179627	0.332502	DENND5A	full-splice_match	alternative_3end5end
247584	6.38203	3.96514	1.67499	2.36727	0.0179199	0.332502	ZMYND8	incomplete-splice_match	3prime_fragment
108467	8.27024	3.91731	1.65479	2.36726	0.0179203	0.332502	RAB5A	full-splice_match	reference_match
19658	6.68812	3.15023	1.33069	2.36736	0.0179155	0.332502	SLC27A3	full-splice_match	alternative_5end
104774	8.98926	1.80328	0.762033	2.36641	0.0179615	0.332502	HMGN1	incomplete-splice_match	3prime_fragment
8710	11.9839	-0.752867	0.318098	-2.36678	0.0179438	0.332502	RBBP4	full-splice_match	alternative_3end
37123	15.9907	-1.17642	0.496872	-2.36766	0.0179009	0.332502	DLG2	incomplete-splice_match	5prime_fragment
31198	15.5314	-1.48202	0.626377	-2.36602	0.0179803	0.332553	PTPMT1	full-splice_match	alternative_3end5end
258854	8.01419	2.82012	1.19225	2.36539	0.0180112	0.33285	SCAP	incomplete-splice_match	intron_retention
130261	7.44749	-1.73574	0.73454	-2.36303	0.0181263	0.334701	NR3C1	incomplete-splice_match	5prime_fragment
524498	12.3781	-4.95444	2.09735	-2.36224	0.018165	0.33514	BACE1	incomplete-splice_match	3prime_fragment
194100	18.6955	4.33084	1.83496	2.36019	0.0182656	0.336719	HNRNPUL2	incomplete-splice_match	3prime_fragment
122128	9.99714	2.44241	1.03554	2.35859	0.0183443	0.336727	PAPSS1	incomplete-splice_match	3prime_fragment
103691	103.094	1.94103	0.823074	2.35827	0.0183606	0.336727	OLIG1	full-splice_match	mono-exon
22731	50.2056	0.946041	0.401073	2.35878	0.0183353	0.336727	PFDN2	full-splice_match	reference_match
60052	5.98637	1.44221	0.611146	2.35985	0.0182823	0.336727	GTF2A2	novel_in_catalog	combination_of_known_splicesites
9493	5.56047	-4.43241	1.87914	-2.35875	0.0183368	0.336727	FPGT	novel_in_catalog	combination_of_known_splicesites
32257	8.99508	-2.87411	1.21848	-2.35876	0.018336	0.336727	SLC1A2	incomplete-splice_match	3prime_fragment
110725	66.3803	-3.47552	1.4739	-2.35805	0.0183713	0.336727	BAP1	full-splice_match	mono-exon
277384	21.1991	-5.48309	2.32557	-2.35773	0.0183869	0.336737	TCP1	incomplete-splice_match	3prime_fragment
89352	36.0436	2.24829	0.953828	2.35712	0.0184173	0.337019	SPTBN1	full-splice_match	alternative_3end5end
116480	7.26084	4.12017	1.7484	2.35654	0.0184462	0.337271	FAM131A	full-splice_match	alternative_3end
29232	7.71349	1.07973	0.458255	2.35617	0.0184643	0.337328	ENSG00000232934	full-splice_match	mono-exon
102616	15.721	-1.93757	0.822851	-2.35471	0.0185373	0.338385	GNAS	incomplete-splice_match	3prime_fragment
355200	7.46934	-4.71149	2.00127	-2.35425	0.0185602	0.338527	MAN2B1	incomplete-splice_match	3prime_fragment
153477	28.6837	3.51274	1.49265	2.35336	0.0186048	0.338885	VPS28	incomplete-splice_match	3prime_fragment
124988	20.9872	2.38214	1.01228	2.35325	0.0186101	0.338885	SELENOP	incomplete-splice_match	3prime_fragment
52822	5.86507	-3.71596	1.57944	-2.35271	0.0186371	0.339102	BBOF1	incomplete-splice_match	5prime_fragment
179816	32.3233	4.28421	1.82153	2.35199	0.0186734	0.339334	CAPN2	incomplete-splice_match	3prime_fragment
113282	12.3801	-3.90211	1.65917	-2.35185	0.0186802	0.339334	TIMMDC1	novel_not_in_catalog	Alt5
154061	15.0375	1.48062	0.629817	2.35087	0.0187295	0.339953	CDKN2A	full-splice_match	alternative_5end
136065	47.8309	2.61294	1.11181	2.35017	0.0187649	0.34032	HINT3	full-splice_match	alternative_3end
277819	5.53462	3.45926	1.47314	2.34823	0.0188629	0.341246	WIPI2	incomplete-splice_match	3prime_fragment
45552	16.3691	2.33194	0.993005	2.34837	0.0188558	0.341246	TSPAN19	novel_not_in_catalog	Alt5
141646	18.3927	-4.04381	1.72227	-2.34795	0.0188769	0.341246	CAMK2B	novel_in_catalog	combination_of_known_junctions
55697	9.01431	-2.57834	1.09792	-2.34839	0.0188546	0.341246	DICER1	incomplete-splice_match	internal_fragment
70269	10.6466	1.76843	0.753316	2.34752	0.0188988	0.341368	RAD51C	full-splice_match	alternative_3end
6645	10.3879	2.30492	0.982173	2.34676	0.0189376	0.341518	GPATCH4	full-splice_match	alternative_3end
130217	42.3692	1.91608	0.816433	2.34689	0.018931	0.341518	GNPDA1	full-splice_match	alternative_3end
144933	5.3507	5.3756	2.29106	2.34634	0.0189587	0.341616	CLDN15	incomplete-splice_match	3prime_fragment
53687	13.9299	2.10596	0.897662	2.34605	0.0189736	0.341616	RN7SL3	full-splice_match	mono-exon
96953	9.30453	1.38681	0.591489	2.34461	0.0190468	0.342659	CREB1	full-splice_match	alternative_3end5end
155538	9.49956	-3.22533	1.37627	-2.34354	0.0191019	0.343123	ZNG1E	full-splice_match	alternative_3end5end
180404	10.1468	-3.95262	1.68663	-2.34351	0.0191032	0.343123	NUP133	full-splice_match	alternative_3end
61649	21.7674	0.905414	0.386441	2.34296	0.0191316	0.343148	NDUFB10	full-splice_match	reference_match
125536	42.2124	-0.877651	0.374602	-2.34289	0.0191353	0.343148	ZFYVE16	incomplete-splice_match	5prime_fragment
11450	8.14999	1.8706	0.798863	2.34158	0.0192022	0.344073	EVA1B	full-splice_match	reference_match
135982	9.64141	-1.10944	0.473987	-2.34066	0.0192499	0.344652	NKAIN2	incomplete-splice_match	5prime_fragment
103678	12.8151	-0.767756	0.328189	-2.33937	0.0193163	0.345563	PAXBP1-AS1	full-splice_match	mono-exon
74556	10.6617	2.22265	0.950256	2.339	0.0193354	0.34563	NT5C	full-splice_match	alternative_3end5end
99936	12.3835	3.0999	1.32578	2.33817	0.0193783	0.346121	PCED1A	incomplete-splice_match	3prime_fragment
340188	24.7848	6.23334	2.66672	2.33745	0.0194158	0.346314	CSK	incomplete-splice_match	3prime_fragment
11619	6.66639	-3.37942	1.44582	-2.33737	0.0194201	0.346314	PPIEL	incomplete-splice_match	3prime_fragment
2895	75.5391	3.7756	1.61666	2.33543	0.019521	0.347838	CCDC92	full-splice_match	alternative_3end
259331	8.43747	5.78879	2.4793	2.33485	0.0195513	0.348099	GLT8D1	novel_in_catalog	combination_of_known_junctions
78067	7.62317	-0.833466	0.357237	-2.33309	0.0196435	0.349464	SIN3B	incomplete-splice_match	5prime_fragment
70011	19.6754	1.18571	0.508346	2.33249	0.0196748	0.349743	ZNF652-AS1	incomplete-splice_match	5prime_fragment
139873	5.56473	2.155	0.924638	2.33064	0.0197723	0.351197	RAC1	novel_in_catalog	combination_of_known_splicesites
259071	6.12492	3.40282	1.46029	2.33023	0.0197939	0.351303	USP4	incomplete-splice_match	3prime_fragment
31004	12.0314	2.04022	0.875824	2.32949	0.0198331	0.351441	IFTAP	full-splice_match	reference_match
74835	16.0953	0.710502	0.305003	2.32949	0.019833	0.351441	CYTH1	incomplete-splice_match	5prime_fragment
34171	23.7433	2.15097	0.923541	2.32905	0.0198566	0.35158	RAB1B	full-splice_match	alternative_3end
42154	8.85168	-0.869811	0.373641	-2.32793	0.0199156	0.35179	NCKAP5L	full-splice_match	alternative_3end5end
144009	7.95723	-1.67626	0.719992	-2.32817	0.0199032	0.35179	COPS6	full-splice_match	alternative_3end
186573	7.999	-3.48879	1.49832	-2.32847	0.0198873	0.35179	SUPV3L1	incomplete-splice_match	3prime_fragment
88633	82.2758	-0.786874	0.338085	-2.32744	0.0199418	0.351975	DYNC2LI1	incomplete-splice_match	5prime_fragment
439422	6.54023	3.8403	1.65084	2.32627	0.0200043	0.352328	PDIA2	incomplete-splice_match	3prime_fragment
68997	6.83579	1.55426	0.668026	2.32665	0.0199842	0.352328	SAT2	incomplete-splice_match	intron_retention
136715	52.1806	-1.04676	0.449992	-2.32618	0.020009	0.352328	ADGRB3-DT	incomplete-splice_match	5prime_fragment
117992	6.53616	3.42772	1.47465	2.32443	0.0201022	0.353692	SLBP	incomplete-splice_match	3prime_fragment
34966	19.7567	2.56209	1.10246	2.32398	0.0201263	0.353838	RBM7	full-splice_match	alternative_3end5end
49892	8.90387	4.98946	2.1477	2.32317	0.02017	0.354113	UBAC2	full-splice_match	alternative_5end
89969	6.41297	-2.27399	0.97886	-2.3231	0.0201736	0.354113	LRPPRC	full-splice_match	alternative_3end5end
42384	51.1684	-0.928777	0.400035	-2.32174	0.0202472	0.355126	CALCOCO1	full-splice_match	alternative_3end
71952	8.84301	-1.15986	0.499721	-2.32102	0.0202857	0.355523	GPATCH8	full-splice_match	alternative_5end
8075	16.7922	1.30421	0.562463	2.31874	0.020409	0.356847	HP1BP3	incomplete-splice_match	5prime_fragment
76070	6.77089	-1.26588	0.545805	-2.31929	0.0203793	0.356847	ZNF519	full-splice_match	alternative_3end
201988	6.19966	-3.74468	1.6149	-2.31883	0.0204041	0.356847	NR2C1	incomplete-splice_match	3prime_fragment
268411	10.629	3.74556	1.61558	2.31839	0.0204279	0.356899	MEF2C	incomplete-splice_match	3prime_fragment
62886	54.6532	3.45593	1.49182	2.31658	0.0205267	0.358346	RHBDL1	incomplete-splice_match	intron_retention
363695	5.70222	3.60075	1.55492	2.31571	0.0205741	0.358614	RAPGEF4	incomplete-splice_match	3prime_fragment
161224	5.32482	3.37068	1.45544	2.31591	0.020563	0.358614	KRBOX4	full-splice_match	alternative_3end
20591	49.1805	2.51731	1.08737	2.31505	0.0206104	0.358967	JTB	incomplete-splice_match	intron_retention
149245	129.982	2.82902	1.22259	2.31395	0.0206703	0.359732	DUSP26	novel_not_in_catalog	Alt3
51264	6.11696	-3.25722	1.40793	-2.31349	0.020696	0.359898	RABGGTA	incomplete-splice_match	3prime_fragment
22946	10.6367	3.22352	1.39397	2.31247	0.020752	0.360313	CLSTN1	incomplete-splice_match	3prime_fragment
144761	98.4864	2.18737	0.945843	2.31262	0.0207436	0.360313	AZGP1	full-splice_match	reference_match
64880	13.4817	1.36442	0.59041	2.31097	0.0208344	0.361463	MT2A	full-splice_match	reference_match
11209	15.7427	4.98669	2.1587	2.31004	0.020886	0.361797	SSBP3	incomplete-splice_match	3prime_fragment
401909	15.6614	-4.47275	1.9362	-2.31007	0.0208845	0.361797	CHMP7	incomplete-splice_match	3prime_fragment
134545	11.6696	2.3256	1.00729	2.30877	0.0209561	0.362712	SNRPC	full-splice_match	alternative_3end
115950	5.8031	1.39492	0.604254	2.3085	0.0209711	0.362712	Telomerase-vert	full-splice_match	mono-exon
114801	5.19099	1.46558	0.635153	2.30744	0.0210303	0.363455	ENSG00000273486	full-splice_match	mono-exon
106210	6.61258	1.49805	0.649415	2.30677	0.0210677	0.363819	ENSG00000270022	full-splice_match	mono-exon
12214	11.1313	3.51208	1.52421	2.30419	0.021212	0.365246	JAK1	incomplete-splice_match	3prime_fragment
418832	6.84278	3.13313	1.35979	2.30413	0.0212152	0.365246	PINK1	full-splice_match	alternative_5end
116975	246.111	-1.77655	0.771129	-2.30384	0.0212318	0.365246	SST	full-splice_match	alternative_3end
36559	10.6321	-2.86123	1.24181	-2.30409	0.0212175	0.365246	CDK2AP2	full-splice_match	alternative_3end5end
524463	7.34775	-4.98424	2.1632	-2.3041	0.0212169	0.365246	CADM1	incomplete-splice_match	3prime_fragment
50485	6.88022	3.49519	1.51778	2.30284	0.0212881	0.365934	ANKRD10	incomplete-splice_match	5prime_fragment
285223	22.4285	-4.23526	1.83958	-2.3023	0.0213184	0.366173	GPAT4	incomplete-splice_match	3prime_fragment
74681	5.53638	-1.14033	0.495549	-2.30115	0.0213831	0.366722	MRPL38	full-splice_match	alternative_3end5end
68996	51.5724	-1.52957	0.664696	-2.30115	0.0213831	0.366722	SAT2	full-splice_match	mono-exon
36704	5.32727	1.80916	0.786734	2.29958	0.0214721	0.367967	NUMA1	incomplete-splice_match	3prime_fragment
442119	16.1484	5.32319	2.31618	2.29826	0.0215468	0.368964	MPRIP	incomplete-splice_match	3prime_fragment
107698	13.3716	3.59784	1.56652	2.29671	0.021635	0.36973	CPT1B	incomplete-splice_match	3prime_fragment
176001	15.1039	3.54521	1.54369	2.29659	0.0216423	0.36973	RABGAP1L	full-splice_match	alternative_3end5end
63565	17.9989	-1.44215	0.628024	-2.29632	0.0216576	0.36973	HCFC1R1	full-splice_match	reference_match
164958	6.32578	-3.69002	1.60636	-2.29714	0.021611	0.36973	WASH6P	full-splice_match	alternative_3end5end
192461	16.1907	2.73445	1.19149	2.29499	0.0217337	0.370466	MED19	incomplete-splice_match	5prime_fragment
20538	5.61041	-2.0541	0.894992	-2.29511	0.021727	0.370466	S100A13	full-splice_match	alternative_5end
83540	33.5756	4.17683	1.82073	2.29405	0.0217879	0.370561	VSTM2B	novel_not_in_catalog	novel_exon
19953	38.2053	3.36418	1.4665	2.29403	0.0217889	0.370561	LMNA	incomplete-splice_match	3prime_fragment
206378	42.5872	-4.86203	2.11892	-2.29458	0.0217571	0.370561	ANKRD10	incomplete-splice_match	3prime_fragment
154936	65.1579	0.819238	0.357322	2.29272	0.0218643	0.37156	TUSC1	full-splice_match	mono-exon
20671	69.282	4.22212	1.84207	2.29205	0.0219028	0.371863	UBE2Q1	full-splice_match	alternative_3end5end
27267	25.621	-3.71531	1.62111	-2.29183	0.0219153	0.371863	LIPA	incomplete-splice_match	3prime_fragment
142390	10.9417	-3.35035	1.46221	-2.29129	0.0219469	0.372118	MDH2	full-splice_match	alternative_3end
30084	190.24	1.92757	0.842038	2.28918	0.0220691	0.373906	TALDO1	full-splice_match	alternative_5end
162419	6.81566	1.9503	0.852299	2.28828	0.0221213	0.374507	PGK1	full-splice_match	reference_match
38361	90.9662	3.59091	1.57017	2.28696	0.0221984	0.374696	JAM3	full-splice_match	alternative_3end
18604	21.7915	3.51373	1.53644	2.28693	0.0221997	0.374696	CPTP	full-splice_match	reference_match
137368	5.23358	1.96973	0.861323	2.28687	0.0222035	0.374696	PNISR	incomplete-splice_match	3prime_fragment
118620	19.463	0.834451	0.364923	2.28665	0.0222161	0.374696	FAM200B	full-splice_match	reference_match
94808	8.13798	-2.57982	1.12817	-2.28673	0.0222117	0.374696	DARS1	full-splice_match	alternative_3end
60495	94.1019	0.659199	0.288357	2.28605	0.0222512	0.375006	HMGB1P6	full-splice_match	mono-exon
133625	7.49206	1.15158	0.503897	2.28534	0.0222927	0.375422	H2BC5	full-splice_match	alternative_5end
113157	21.6242	3.27309	1.43248	2.28491	0.0223181	0.375567	ATP1B3	full-splice_match	alternative_3end
102663	24.181	3.64739	1.59711	2.28374	0.0223867	0.376431	LSM14B	incomplete-splice_match	3prime_fragment
68211	6.16315	2.76869	1.2125	2.28346	0.0224032	0.376431	ENSG00000290976	incomplete-splice_match	3prime_fragment
38482	5.53477	-1.93512	0.847557	-2.28318	0.0224198	0.376431	OPCML	incomplete-splice_match	5prime_fragment
125859	11.8466	2.28046	0.99916	2.28237	0.0224673	0.376946	ERBIN	incomplete-splice_match	5prime_fragment
82741	6.26955	-1.60342	0.702654	-2.28195	0.0224922	0.377082	ZNF880	full-splice_match	alternative_3end
245332	5.79058	3.7436	1.64122	2.28098	0.0225495	0.377195	SEPTIN2	incomplete-splice_match	3prime_fragment
195393	6.9398	3.30113	1.44709	2.28122	0.0225357	0.377195	GRIA4	incomplete-splice_match	3prime_fragment
48024	27.8018	1.81052	0.793549	2.28155	0.0225162	0.377195	N4BP2L2	full-splice_match	reference_match
9565	5.40212	1.04788	0.459712	2.27944	0.0226412	0.37826	ACADM	incomplete-splice_match	3prime_fragment
28566	36.9276	-1.1823	0.518704	-2.27934	0.022647	0.37826	RBP4	full-splice_match	alternative_3end5end
109753	5.32543	3.18445	1.39728	2.27904	0.0226649	0.378277	MOBP	incomplete-splice_match	3prime_fragment
137174	10.4974	3.31522	1.45513	2.2783	0.0227086	0.378724	MAP3K7	incomplete-splice_match	3prime_fragment
3514	10.3049	3.19779	1.40539	2.27538	0.0228833	0.38107	TBCD	full-splice_match	alternative_5end
407484	9.77431	-4.92119	2.16256	-2.27564	0.0228678	0.38107	NMRK1	full-splice_match	reference_match
101251	5.71291	2.70345	1.18873	2.27424	0.0229513	0.381352	SYS1	full-splice_match	alternative_3end
110086	7.58201	-0.930306	0.409025	-2.27445	0.022939	0.381352	KIF9-AS1	full-splice_match	alternative_3end
36339	24.8806	-3.01167	1.32419	-2.27434	0.0229455	0.381352	FIBP	incomplete-splice_match	3prime_fragment
77001	18.8056	-2.30483	1.01383	-2.2734	0.023002	0.381912	ATP5F1A	incomplete-splice_match	3prime_fragment
146818	9.1987	2.85384	1.25756	2.26934	0.0232478	0.385706	WASL	incomplete-splice_match	3prime_fragment
112434	6.86484	-2.80184	1.23513	-2.26846	0.0233013	0.386309	TFG	full-splice_match	alternative_3end
23394	7.65572	2.11952	0.934462	2.26817	0.0233187	0.38631	ADARB2	full-splice_match	reference_match
8772	14.0112	2.26458	0.998684	2.26756	0.0233558	0.386353	CDKN2C	full-splice_match	alternative_5end
129227	57.1835	-4.43439	1.95542	-2.26774	0.023345	0.386353	NDFIP1	novel_in_catalog	combination_of_known_splicesites
435062	6.66891	5.68039	2.50596	2.26675	0.0234055	0.386734	AP1G2	incomplete-splice_match	3prime_fragment
41093	35.7482	2.26444	0.999038	2.26662	0.0234133	0.386734	SLC48A1	full-splice_match	alternative_3end
160827	1600.69	1.80436	0.796274	2.26601	0.0234508	0.387068	GPM6B	full-splice_match	alternative_3end
2811	17.5395	2.83427	1.25152	2.26466	0.0235337	0.387579	CDKN1C	full-splice_match	alternative_3end
129046	7.4925	1.96264	0.866619	2.26471	0.0235303	0.387579	ANKHD1	full-splice_match	alternative_3end
11677	15.1764	-1.97617	0.87257	-2.26477	0.0235268	0.387579	COL16A1	incomplete-splice_match	3prime_fragment
225951	42.6543	6.39221	2.82381	2.26368	0.0235937	0.387996	CSNK1D	incomplete-splice_match	3prime_fragment
33368	13.5724	0.763916	0.337459	2.26373	0.0235909	0.387996	FUT4	full-splice_match	mono-exon
185432	5.38761	5.45156	2.40946	2.26256	0.0236628	0.388841	CCNY	incomplete-splice_match	3prime_fragment
155798	10.9106	1.57913	0.698025	2.26229	0.0236798	0.388841	ZFAND5	incomplete-splice_match	5prime_fragment
124986	31.1217	2.45868	1.0871	2.26168	0.0237174	0.389173	SELENOP	novel_in_catalog	combination_of_known_splicesites
129008	93.5187	0.67058	0.296668	2.26037	0.0237983	0.389645	CYSTM1	full-splice_match	alternative_5end
42644	6.45154	-1.50127	0.664025	-2.26086	0.0237677	0.389645	PUS7L	incomplete-splice_match	3prime_fragment
104934	10.1417	-2.37296	1.04972	-2.26057	0.0237858	0.389645	UBE2G2	full-splice_match	alternative_3end5end
99750	6.80661	-1.10417	0.488597	-2.25987	0.0238291	0.389864	PTPRA	incomplete-splice_match	5prime_fragment
27537	25.8418	-4.02416	1.78099	-2.2595	0.0238523	0.389958	GOLGA7B	novel_not_in_catalog	UTR_UTR
8328	86.7059	0.856242	0.379168	2.25821	0.0239325	0.390121	SYF2	full-splice_match	alternative_3end
61280	8.79572	-1.04174	0.461251	-2.2585	0.0239146	0.390121	SNRPA1	full-splice_match	alternative_3end5end
49399	28.5353	-1.56071	0.69123	-2.25787	0.0239536	0.390121	PIBF1	incomplete-splice_match	5prime_fragment
99099	155.324	-2.08615	0.923667	-2.25855	0.0239115	0.390121	NDUFA10	full-splice_match	alternative_3end
18084	10.0317	-2.83607	1.2562	-2.25766	0.0239667	0.390121	TMEM50A	full-splice_match	alternative_3end
35559	7.73158	-2.90491	1.28631	-2.25833	0.0239253	0.390121	UBE2L6	full-splice_match	reference_match
64499	19.1679	1.89724	0.840661	2.25684	0.0240179	0.39067	ZNF688	full-splice_match	alternative_5end
37984	13.054	3.0336	1.34473	2.25592	0.0240754	0.390816	C1QTNF5	full-splice_match	reference_match
67493	8.90607	-1.66146	0.736411	-2.25616	0.0240608	0.390816	RPL21P120	full-splice_match	mono-exon
194788	79.6106	-4.79993	2.12776	-2.25586	0.0240792	0.390816	NUMA1	full-splice_match	alternative_5end
51616	17.4403	0.932859	0.413653	2.25517	0.0241226	0.391237	ENSG00000279423	full-splice_match	mono-exon
99633	6.57767	1.4204	0.629932	2.25485	0.0241428	0.391282	SNAP25	incomplete-splice_match	3prime_fragment
36301	21.2092	1.4254	0.632846	2.25236	0.0242997	0.393539	RNASEH2C	full-splice_match	alternative_3end5end
223713	5.32263	5.12082	2.275	2.25091	0.0243911	0.394449	CLTC	incomplete-splice_match	3prime_fragment
108126	6.96151	-3.28961	1.46141	-2.25099	0.0243862	0.394449	ENSG00000291224	novel_in_catalog	combination_of_known_splicesites
60450	8.94753	2.30714	1.02571	2.2493	0.0244935	0.395588	MAN2C1	incomplete-splice_match	3prime_fragment
126278	25.5631	-1.06269	0.472463	-2.24925	0.0244968	0.395588	TMEM161B-DT	full-splice_match	alternative_3end
35656	37.1066	-4.4471	1.97783	-2.24847	0.0245461	0.396097	FADS3	incomplete-splice_match	3prime_fragment
93283	5.90304	-2.12454	0.945696	-2.24653	0.0246699	0.397809	IMP4	full-splice_match	alternative_3end
130289	7.88229	-2.74927	1.22481	-2.24466	0.0247901	0.39946	PPP2R2B	incomplete-splice_match	5prime_fragment
121994	7.56362	2.90421	1.29416	2.24409	0.0248265	0.399759	UBE2D3	incomplete-splice_match	3prime_fragment
9059	15.4769	4.12913	1.84175	2.24197	0.0249635	0.401561	USP1	incomplete-splice_match	3prime_fragment
135568	16.0584	1.05753	0.47179	2.24152	0.0249922	0.401561	PHF3	incomplete-splice_match	5prime_fragment
285345	8.257	3.1413	1.40134	2.24164	0.0249848	0.401561	TACC1	novel_in_catalog	combination_of_known_junctions
30121	8.97881	1.09122	0.486925	2.24104	0.0250232	0.40177	RPLP2	novel_in_catalog	combination_of_known_splicesites
47989	10.1849	-1.85483	0.82804	-2.24003	0.0250893	0.40182	N4BP2L2	incomplete-splice_match	3prime_fragment
42990	25.1828	-2.38004	1.06236	-2.24034	0.0250691	0.40182	XPOT	incomplete-splice_match	3prime_fragment
205909	18.1169	-5.11608	2.28407	-2.23989	0.025098	0.40182	IPO5	incomplete-splice_match	3prime_fragment
503113	18.4123	-5.16524	2.30535	-2.24054	0.025056	0.40182	ABCB6	incomplete-splice_match	intron_retention
40770	10.7747	-3.59541	1.60544	-2.23952	0.0251221	0.401917	COQ10A	incomplete-splice_match	intron_retention
283718	12.1412	3.31875	1.48239	2.23879	0.0251697	0.402105	KMT2C	incomplete-splice_match	3prime_fragment
74783	51.7102	-1.68646	0.753223	-2.23899	0.0251567	0.402105	SRSF2	full-splice_match	reference_match
205506	19.1559	-3.27403	1.46271	-2.23833	0.0251992	0.402289	SLAIN1	incomplete-splice_match	3prime_fragment
284938	9.45464	-4.36618	1.95159	-2.23724	0.0252708	0.403145	BIN3	novel_in_catalog	combination_of_known_junctions
66447	180.886	1.8031	0.806157	2.23666	0.0253084	0.403171	MT1G	full-splice_match	reference_match
87930	8.39535	-1.12937	0.504931	-2.23668	0.0253075	0.403171	CYRIA	incomplete-splice_match	5prime_fragment
56600	24.0599	-1.52609	0.682519	-2.23597	0.0253539	0.403608	GABRB3	incomplete-splice_match	5prime_fragment
32797	11.2396	3.9309	1.75927	2.23439	0.0254574	0.40382	PAAF1	full-splice_match	alternative_3end
546	6.17384	3.03442	1.35761	2.23513	0.0254091	0.40382	FLOT1	incomplete-splice_match	3prime_fragment
101958	13.1342	1.28149	0.573517	2.23444	0.0254544	0.40382	ENSG00000277829	full-splice_match	mono-exon
26444	50.1798	-2.11999	0.948724	-2.23457	0.0254458	0.40382	ANK3	incomplete-splice_match	3prime_fragment
476081	45.5548	-5.11664	2.28961	-2.23472	0.025436	0.40382	SMARCA2	incomplete-splice_match	3prime_fragment
105188	357.385	0.849258	0.38017	2.23389	0.0254905	0.404059	COMT	full-splice_match	alternative_3end5end
103284	156.603	0.595344	0.266592	2.23317	0.0255378	0.404238	ENSG00000280800	full-splice_match	mono-exon
159658	40.4783	-2.4823	1.11152	-2.23324	0.0255332	0.404238	HSPA5	incomplete-splice_match	3prime_fragment
459091	5.77993	5.94474	2.66362	2.23183	0.0256262	0.404332	ABHD6	incomplete-splice_match	3prime_fragment
366888	10.2419	4.20793	1.88552	2.2317	0.0256346	0.404332	FARP2	incomplete-splice_match	3prime_fragment
145111	24.943	-0.959332	0.429757	-2.23227	0.0255974	0.404332	DPY19L2P2	full-splice_match	mono-exon
133932	12.3414	-2.24597	1.00651	-2.23144	0.0256521	0.404332	SRSF3	full-splice_match	alternative_5end
68464	6.79004	-2.22939	0.998507	-2.23273	0.0255671	0.404332	CCDC144CP	novel_in_catalog	combination_of_known_splicesites
201510	5.89428	-4.54044	2.03427	-2.23197	0.0256169	0.404332	UTP20	incomplete-splice_match	3prime_fragment
109789	14.7068	-0.810587	0.363313	-2.2311	0.0256747	0.404404	ENTPD3	incomplete-splice_match	5prime_fragment
69297	9.8531	1.13981	0.510983	2.23063	0.0257055	0.404605	COX10-DT	full-splice_match	mono-exon
132280	26.4839	-2.98708	1.33939	-2.23018	0.0257354	0.404791	MARCHF6	incomplete-splice_match	3prime_fragment
195686	12.4408	4.14268	1.85919	2.22822	0.0258661	0.40642	NCAM1	incomplete-splice_match	3prime_fragment
25985	8.39299	1.51973	0.682079	2.22808	0.0258753	0.40642	PLAC9	full-splice_match	alternative_3end5end
287382	22.6503	3.13092	1.40574	2.22724	0.025931	0.40701	OXR1	incomplete-splice_match	3prime_fragment
75751	12.6427	4.84822	2.17809	2.22591	0.0260203	0.407197	SEH1L	incomplete-splice_match	3prime_fragment
51521	19.6199	2.86137	1.28554	2.22581	0.026027	0.407197	ARHGAP5	incomplete-splice_match	3prime_fragment
125566	11.1183	2.53938	1.14074	2.22608	0.0260091	0.407197	ZFYVE16	incomplete-splice_match	internal_fragment
156749	9.09774	-1.00735	0.452433	-2.22652	0.0259795	0.407197	NIPSNAP3B	incomplete-splice_match	5prime_fragment
15061	9.17755	-1.74119	0.782406	-2.22544	0.026052	0.407197	LRRC8D	full-splice_match	alternative_3end5end
123145	32.262	-2.78691	1.25225	-2.22553	0.0260459	0.407197	GRIA2	incomplete-splice_match	3prime_fragment
119824	23.3546	2.86232	1.287	2.22402	0.0261468	0.407825	EXOC1	incomplete-splice_match	3prime_fragment
17007	9.08846	-3.52227	1.58353	-2.22431	0.0261273	0.407825	LINC01750	novel_in_catalog	combination_of_known_junctions
52848	12.5198	-4.47707	2.01281	-2.22429	0.0261288	0.407825	DAAM1	full-splice_match	alternative_5end
302355	11.9925	-2.98911	1.34565	-2.2213	0.0263304	0.410402	MGAT4B	incomplete-splice_match	3prime_fragment
10718	29.4482	-5.51055	2.48169	-2.22049	0.0263858	0.41098	LRRC41	incomplete-splice_match	3prime_fragment
129193	5.27648	-1.33987	0.603597	-2.21981	0.0264313	0.411117	RNF14	incomplete-splice_match	5prime_fragment
147453	9.4398	-2.96298	1.33476	-2.21986	0.0264283	0.411117	PRKAG2	full-splice_match	alternative_3end5end
135028	38.3528	0.848659	0.382445	2.21904	0.0264843	0.411656	MRPS18A	full-splice_match	alternative_3end
62925	120.61	1.31323	0.592028	2.21819	0.0265418	0.411717	METRN	full-splice_match	alternative_3end
143848	6.49647	-0.878764	0.396215	-2.2179	0.0265618	0.411717	LMTK2	incomplete-splice_match	5prime_fragment
156640	35.8386	-2.62314	1.18258	-2.21814	0.0265454	0.411717	CARD19	novel_in_catalog	combination_of_known_junctions
5646	10.6624	-4.34179	1.95701	-2.21858	0.026515	0.411717	LONRF1	full-splice_match	alternative_3end5end
27452	93.0015	1.18305	0.533485	2.21759	0.0265829	0.411759	RPL13AP5	full-splice_match	mono-exon
49396	13.4689	1.07756	0.48602	2.21711	0.0266156	0.411981	H3P36	full-splice_match	mono-exon
91789	21.3156	4.27053	1.92729	2.21582	0.026704	0.413064	MAP4K4	incomplete-splice_match	3prime_fragment
20527	6.40253	2.46786	1.11456	2.2142	0.0268151	0.413924	S100A4	full-splice_match	reference_match
63368	207.952	0.988283	0.446231	2.21473	0.0267784	0.413924	ENSG00000260566	full-splice_match	mono-exon
95337	5.44238	-1.41439	0.638733	-2.21437	0.0268032	0.413924	TTC21B	incomplete-splice_match	5prime_fragment
204413	9.30454	3.3128	1.49806	2.21139	0.0270088	0.415768	SPART	full-splice_match	alternative_3end5end
111563	7.94065	-2.88146	1.303	-2.21141	0.0270073	0.415768	MAP4	novel_in_catalog	combination_of_known_junctions
69083	8.67939	-2.74416	1.24087	-2.21147	0.0270031	0.415768	VAMP2	full-splice_match	alternative_3end
288181	8.82301	-4.86242	2.19876	-2.21143	0.0270058	0.415768	KIFC2	incomplete-splice_match	3prime_fragment
326199	6.03528	-3.9905	1.80518	-2.21058	0.0270648	0.416344	CREBL2	incomplete-splice_match	3prime_fragment
39695	15.2673	-1.86384	0.843755	-2.20899	0.0271756	0.417762	FGFR1OP2	full-splice_match	alternative_3end5end
56349	6.77158	-3.20387	1.45069	-2.20851	0.0272086	0.417982	ENSG00000274253	novel_not_in_catalog	partial_intron_retention
333342	31.5042	4.81805	2.18209	2.208	0.0272445	0.418241	MYCBP2	incomplete-splice_match	3prime_fragment
230806	6.03128	2.12723	0.963652	2.20747	0.0272815	0.418241	LINGO3	full-splice_match	mono-exon
155989	29.7786	1.54409	0.69943	2.20765	0.027269	0.418241	PRUNE2	incomplete-splice_match	5prime_fragment
123013	33.2836	-4.19515	1.90137	-2.20639	0.027357	0.418826	TRIM2	incomplete-splice_match	3prime_fragment
188965	6.04834	-4.76231	2.1584	-2.20641	0.0273554	0.418826	LDB1	incomplete-splice_match	3prime_fragment
252887	5.47619	3.93618	1.78441	2.20588	0.0273926	0.419084	CLDND1	full-splice_match	alternative_3end
104445	9.19803	1.33714	0.606282	2.20548	0.0274202	0.419127	ENSG00000273271	full-splice_match	mono-exon
149317	9.0566	-2.00667	0.90993	-2.2053	0.0274328	0.419127	NSD3	full-splice_match	alternative_3end5end
133204	8.55581	1.32965	0.603053	2.20486	0.0274637	0.419313	FAM8A1	full-splice_match	alternative_3end
273912	11.0043	2.55512	1.15946	2.20371	0.0275445	0.419784	DST	incomplete-splice_match	internal_fragment
10396	11.6539	1.82652	0.828871	2.20362	0.0275508	0.419784	IPO13	full-splice_match	alternative_3end5end
139744	25.8022	-1.00318	0.455217	-2.20373	0.027543	0.419784	SUN1	novel_in_catalog	combination_of_known_junctions
132198	23.078	-3.99096	1.81155	-2.20307	0.0275897	0.420092	ADCY2	incomplete-splice_match	3prime_fragment
281755	6.05703	6.01476	2.73165	2.20188	0.0276738	0.420887	KRIT1	incomplete-splice_match	3prime_fragment
330790	7.964	5.7052	2.59203	2.20105	0.0277322	0.420887	GNPTAB	incomplete-splice_match	3prime_fragment
142307	10.1338	2.77552	1.26065	2.20166	0.0276896	0.420887	VOPP1	full-splice_match	alternative_3end
124926	33.0905	1.47008	0.667915	2.201	0.0277359	0.420887	TTC33	full-splice_match	alternative_3end5end
245066	11.0527	-4.28041	1.94442	-2.20138	0.0277091	0.420887	TRIP12	incomplete-splice_match	3prime_fragment
8562	6.7617	3.50642	1.59331	2.20071	0.0277565	0.420913	MECR	full-splice_match	alternative_3end
42800	9.22116	-0.691843	0.31452	-2.19968	0.0278297	0.421739	TWF1	full-splice_match	alternative_3end
124191	7.77247	2.56222	1.16549	2.19841	0.0279197	0.422245	FBXO8	full-splice_match	reference_match
125633	5.78855	-1.46461	0.666166	-2.19856	0.0279089	0.422245	LNCBRM	full-splice_match	alternative_3end5end
28847	8.13718	-1.73082	0.787266	-2.19852	0.0279124	0.422245	ATE1OSP	full-splice_match	alternative_3end5end
132882	6.72665	1.94608	0.885363	2.19806	0.0279446	0.422337	SERPINB1	incomplete-splice_match	5prime_fragment
419757	20.7897	5.87521	2.67385	2.19728	0.0280003	0.422608	CHD5	incomplete-splice_match	3prime_fragment
142463	9.45847	-0.715271	0.325519	-2.19732	0.0279974	0.422608	PHTF2	incomplete-splice_match	5prime_fragment
70378	26.2837	2.76791	1.26037	2.19611	0.0280843	0.423591	CLTC	incomplete-splice_match	3prime_fragment
80343	15.4238	-1.41179	0.643	-2.19562	0.0281189	0.423826	SUGP2	incomplete-splice_match	5prime_fragment
66212	12.8142	0.983709	0.448408	2.19378	0.0282514	0.425537	BRD7	incomplete-splice_match	5prime_fragment
175208	5.791	3.81061	1.73805	2.19246	0.0283463	0.42668	CERS2	incomplete-splice_match	3prime_fragment
269394	9.24536	3.19164	1.45744	2.1899	0.0285316	0.429182	REEP2	full-splice_match	alternative_3end
262771	7.23715	2.49999	1.14198	2.18917	0.0285843	0.429686	WDFY3	incomplete-splice_match	3prime_fragment
178462	13.5167	3.74343	1.71058	2.1884	0.0286405	0.429953	TMEM183A	incomplete-splice_match	5prime_fragment
85156	31.6787	1.08916	0.497657	2.18858	0.0286275	0.429953	ZNF677	full-splice_match	mono-exon
83914	6.21456	-1.08753	0.497049	-2.18797	0.0286715	0.430129	ZNF566-AS1	full-splice_match	mono-exon
108944	13.0815	-0.898848	0.410906	-2.18748	0.0287076	0.430383	METTL6	incomplete-splice_match	5prime_fragment
128774	17.3471	2.09971	0.960319	2.18647	0.0287814	0.431201	SLC25A48	full-splice_match	alternative_5end
234715	10.0749	3.71149	1.69891	2.18463	0.028916	0.431967	DPF1	full-splice_match	alternative_3end5end
138178	20.532	3.28991	1.50604	2.18447	0.0289276	0.431967	SASH1	incomplete-splice_match	3prime_fragment
107346	7.61725	2.78475	1.27496	2.18419	0.0289482	0.431967	APOL2	full-splice_match	alternative_3end
42248	14.2114	0.898049	0.41114	2.18429	0.028941	0.431967	ENSG00000278126	full-splice_match	mono-exon
64498	34.6208	-1.72129	0.787877	-2.18472	0.0289092	0.431967	ZNF688	full-splice_match	alternative_3end
113508	10.8635	-2.8809	1.31879	-2.18449	0.028926	0.431967	ENPP7P4	incomplete-splice_match	3prime_fragment
130172	54.9557	-2.66678	1.22133	-2.1835	0.028999	0.432436	HARS1	incomplete-splice_match	3prime_fragment
156466	20.382	-1.94676	0.891703	-2.1832	0.0290213	0.43248	HABP4	incomplete-splice_match	3prime_fragment
42343	26.8205	1.68892	0.774535	2.18056	0.0292156	0.435087	ATP5MC2	novel_in_catalog	combination_of_known_splicesites
46604	10.1641	-1.99204	0.914022	-2.17942	0.0293002	0.436057	RAB35	full-splice_match	reference_match
239262	6.76443	2.27887	1.047	2.17657	0.0295124	0.438472	SUCLG1	incomplete-splice_match	3prime_fragment
151978	8.33219	-1.06173	0.487765	-2.17673	0.0295008	0.438472	BAALC-AS2	full-splice_match	reference_match
9192	30.0816	-2.44647	1.12406	-2.17646	0.0295212	0.438472	DNAJC6	incomplete-splice_match	3prime_fragment
31177	5.23116	-1.76797	0.813279	-2.17388	0.0297141	0.441045	CRY2	full-splice_match	alternative_3end
87700	18.296	-2.21144	1.01758	-2.17323	0.0297633	0.441482	ITGB1BP1	novel_in_catalog	combination_of_known_junctions
34979	10.2548	-1.16637	0.536834	-2.17269	0.029804	0.441501	GRIA4	full-splice_match	alternative_3end5end
135703	13.0714	-3.74542	1.72372	-2.17287	0.02979	0.441501	SLC35A1	full-splice_match	alternative_3end
50483	14.856	2.71977	1.25213	2.17211	0.0298472	0.441849	ANKRD10	full-splice_match	alternative_3end5end
116711	20.5218	2.30094	1.05946	2.17181	0.0298701	0.441896	PEX5L	incomplete-splice_match	3prime_fragment
72131	65.1022	-1.66212	0.765498	-2.17129	0.0299093	0.442184	LYRM9	full-splice_match	reference_match
125509	9.12046	-1.38394	0.638129	-2.16874	0.0301023	0.444744	CMYA5	incomplete-splice_match	5prime_fragment
238894	9.07615	4.03653	1.86304	2.16664	0.0302624	0.446778	FANCL	full-splice_match	reference_match
229308	5.27258	2.36301	1.09078	2.16634	0.0302849	0.446778	ZNF714	incomplete-splice_match	3prime_fragment
26472	24.0077	1.27694	0.589497	2.16615	0.0302999	0.446778	KCNMA1	full-splice_match	alternative_3end5end
85899	29.4934	1.57637	0.727948	2.1655	0.0303492	0.447212	TTC9B	incomplete-splice_match	intron_retention
141808	7.00133	3.17889	1.46865	2.1645	0.0304263	0.448053	HNRNPA2B1	full-splice_match	alternative_3end5end
305783	23.5033	4.91225	2.26976	2.16422	0.0304478	0.448075	ATP1B1	full-splice_match	alternative_3end5end
431713	25.3449	5.64004	2.60686	2.16354	0.0305	0.448548	NELL2	incomplete-splice_match	3prime_fragment
37934	5.44568	-1.42279	0.657903	-2.16262	0.0305703	0.449287	RPS25	full-splice_match	alternative_3end5end
260204	57.1875	-4.56946	2.11332	-2.16221	0.0306018	0.449455	NELFA	incomplete-splice_match	intron_retention
190303	12.2443	2.34287	1.08384	2.16164	0.030646	0.44981	PHRF1	incomplete-splice_match	3prime_fragment
67998	27.3887	1.93673	0.896343	2.1607	0.0307187	0.450582	NDEL1	full-splice_match	mono-exon
36644	14.3125	1.36814	0.633324	2.16025	0.0307531	0.45079	MRPL21	full-splice_match	reference_match
371522	42.9814	-4.24762	1.96727	-2.15915	0.0308388	0.451751	CABIN1	incomplete-splice_match	3prime_fragment
12210	6.15131	-0.876725	0.406121	-2.15878	0.0308675	0.451876	ITGB3BP	incomplete-splice_match	5prime_fragment
86166	6.11216	-1.77864	0.824148	-2.15815	0.0309159	0.451993	TRAPPC6A	full-splice_match	reference_match
115961	7.02267	-3.44602	1.59669	-2.15823	0.0309098	0.451993	PHC3	incomplete-splice_match	5prime_fragment
131284	113.298	3.18121	1.47454	2.15742	0.0309727	0.452222	SQSTM1	full-splice_match	alternative_3end
98987	20.482	-0.838351	0.388634	-2.15717	0.0309921	0.452222	NGEF	incomplete-splice_match	5prime_fragment
240352	14.8708	-3.14459	1.45758	-2.15741	0.0309737	0.452222	ACTR3	incomplete-splice_match	3prime_fragment
149934	13.1939	-0.881616	0.408804	-2.15657	0.0310388	0.452443	CSPP1	incomplete-splice_match	5prime_fragment
151300	15.5651	-1.06548	0.494085	-2.15646	0.0310476	0.452443	PDP1	full-splice_match	alternative_3end5end
137432	14.4074	2.105	0.976261	2.15618	0.0310695	0.452467	POPDC3	full-splice_match	alternative_3end
35616	25.2002	3.24298	1.50514	2.1546	0.0311934	0.453961	PAK1	incomplete-splice_match	3prime_fragment
121820	45.1797	2.26381	1.05081	2.15435	0.0312126	0.453961	SCD5	incomplete-splice_match	3prime_fragment
31604	18.919	2.49448	1.15909	2.15211	0.0313888	0.456068	CHID1	full-splice_match	alternative_5end
152844	7.80189	-1.30669	0.607203	-2.15199	0.0313982	0.456068	CYRIB	full-splice_match	alternative_3end
55508	5.19797	-1.10221	0.512357	-2.15125	0.0314565	0.456618	EML5	incomplete-splice_match	5prime_fragment
55674	36.5496	2.41646	1.12469	2.14856	0.0316696	0.458354	DDX24	incomplete-splice_match	3prime_fragment
71048	8.24102	2.31418	1.07727	2.14819	0.0316988	0.458354	ZNF207	full-splice_match	alternative_3end5end
67972	7.31998	1.91571	0.89158	2.14867	0.0316605	0.458354	RANGRF	full-splice_match	reference_match
70587	5.40063	1.4813	0.689375	2.14876	0.0316538	0.458354	PSMC5	incomplete-splice_match	5prime_fragment
79267	15.1479	-0.895871	0.416997	-2.14839	0.031683	0.458354	RPS28	full-splice_match	alternative_5end
3105	6.54077	-2.23542	1.04016	-2.14911	0.0316257	0.458354	NTAN1	full-splice_match	reference_match
154461	7.81668	-1.01724	0.473923	-2.14642	0.0318397	0.460094	ENSG00000288949	full-splice_match	mono-exon
211306	8.1735	3.95683	1.84401	2.14578	0.0318905	0.460532	GABRA5	incomplete-splice_match	3prime_fragment
86119	11.069	4.28301	1.99777	2.14389	0.0320416	0.462113	ZNF404	incomplete-splice_match	3prime_fragment
163935	69.2672	-0.553116	0.257998	-2.14387	0.0320429	0.462113	DANT2	full-splice_match	mono-exon
140387	12.1203	-5.32892	2.48592	-2.14364	0.032062	0.462113	EIF2AK1	incomplete-splice_match	3prime_fragment
245922	11.694	3.62554	1.6924	2.14225	0.032173	0.462226	LZTS3	incomplete-splice_match	3prime_fragment
33974	10.4974	3.28367	1.5321	2.14325	0.0320928	0.462226	MALAT1	incomplete-splice_match	5prime_fragment
136744	5.5737	3.12986	1.46051	2.14299	0.0321143	0.462226	KHDC1	full-splice_match	alternative_3end5end
62928	6.39253	-2.13208	0.995113	-2.14255	0.0321491	0.462226	METRN	novel_not_in_catalog	Alt3
162435	30.5578	-3.45553	1.61287	-2.14247	0.0321558	0.462226	LAS1L	incomplete-splice_match	3prime_fragment
42590	5.44588	-2.64298	1.23423	-2.1414	0.0322419	0.46292	CNPY2	novel_in_catalog	combination_of_known_junctions,intron_retention
436917	9.83626	5.29043	2.47119	2.14085	0.0322863	0.462963	MEG8	full-splice_match	alternative_5end
153320	20.4158	-3.094	1.44506	-2.14109	0.0322672	0.462963	LY6H	full-splice_match	reference_match
147585	6.59983	3.09421	1.44599	2.13985	0.0323666	0.463817	ATG9B	full-splice_match	alternative_3end5end
128636	21.8117	1.3854	0.647584	2.13934	0.0324079	0.463817	UQCRQ	full-splice_match	reference_match
136086	5.38181	-3.36157	1.57116	-2.13955	0.0323914	0.463817	TRMT11	novel_in_catalog	combination_of_known_splicesites
64660	34.4832	-1.94031	0.907361	-2.13841	0.0324838	0.464605	ENSG00000289755	novel_in_catalog	combination_of_known_junctions
107217	9.6711	3.01468	1.41114	2.13634	0.0326516	0.465063	ST13	incomplete-splice_match	3prime_fragment
239906	8.53983	2.9615	1.38669	2.13567	0.0327065	0.465063	LINC00342	full-splice_match	alternative_5end
11887	16.9509	2.61601	1.22431	2.13672	0.032621	0.465063	HYI	full-splice_match	alternative_3end5end
150603	48.9647	1.45431	0.680638	2.13669	0.0326234	0.465063	PKIA	full-splice_match	alternative_3end
73682	16.4344	-0.743209	0.347834	-2.13668	0.0326243	0.465063	PSMD12	incomplete-splice_match	5prime_fragment
15663	5.91677	-0.762011	0.35687	-2.13526	0.0327399	0.465063	TOMM20	incomplete-splice_match	5prime_fragment
29016	5.93408	-0.865307	0.405227	-2.13536	0.0327315	0.465063	ACADSB	incomplete-splice_match	5prime_fragment
27235	6.27021	-0.915581	0.428802	-2.13521	0.0327442	0.465063	NUTM2A-AS1	full-splice_match	alternative_3end5end
13832	7.83726	-1.35783	0.63529	-2.13734	0.0325701	0.465063	ZBTB18	full-splice_match	alternative_3end
38646	9.85763	1.78429	0.835585	2.13538	0.0327303	0.465063	ADIPOR2	novel_in_catalog	combination_of_known_splicesites
154206	5.98884	-4.007	1.87446	-2.13768	0.0325425	0.465063	PTPRD	incomplete-splice_match	internal_fragment
252777	13.563	-3.92182	1.83761	-2.13419	0.0328272	0.465946	DZIP3	incomplete-splice_match	3prime_fragment
46687	6.67261	2.91468	1.36597	2.13378	0.0328612	0.466133	CABP1-DT	full-splice_match	alternative_3end5end
58072	6.52872	-2.12819	0.998133	-2.13217	0.0329927	0.467703	SH3GL3	incomplete-splice_match	3prime_fragment
121252	11.2618	2.78598	1.30719	2.13128	0.0330661	0.46787	CENPC	incomplete-splice_match	3prime_fragment
146050	12.1528	2.26074	1.06138	2.13	0.0331716	0.46787	HILPDA	full-splice_match	reference_match
104847	21.0876	0.586847	0.275307	2.13161	0.033039	0.46787	ZBTB21	full-splice_match	alternative_3end
29347	21.3352	-0.978787	0.459412	-2.13052	0.0331287	0.46787	FAM204A	full-splice_match	alternative_3end
132139	8.78514	-1.13372	0.53208	-2.13074	0.033111	0.46787	ENSG00000291079	full-splice_match	alternative_3end
92515	7.20093	-2.62941	1.23433	-2.13024	0.033152	0.46787	LINC01102	incomplete-splice_match	3prime_fragment
143757	8.87852	-3.20446	1.50358	-2.13122	0.0330708	0.46787	CASD1	full-splice_match	alternative_3end5end
105538	6.57468	-3.49723	1.64154	-2.13045	0.0331344	0.46787	MIAT	novel_not_in_catalog	UTR_UTR
92473	26.207	2.20599	1.036	2.12933	0.0332266	0.468351	MRPS5	full-splice_match	alternative_5end
135302	20.6412	2.68531	1.2617	2.12833	0.0333099	0.46923	ZNF451	incomplete-splice_match	3prime_fragment
130752	12.2926	3.01579	1.41726	2.1279	0.0333453	0.469434	GABRA1	incomplete-splice_match	3prime_fragment
34236	12.1457	1.8214	0.856134	2.12747	0.0333811	0.469642	RBM4	full-splice_match	alternative_3end
150301	11.4838	1.861	0.875318	2.12608	0.0334962	0.470966	BPNT2	incomplete-splice_match	3prime_fragment
20898	11.1706	3.74042	1.75987	2.1254	0.0335531	0.471002	PAQR6	full-splice_match	reference_match
78634	127.435	1.88016	0.88475	2.12507	0.0335806	0.471002	CDC34	full-splice_match	alternative_5end
18453	8.91794	1.09866	0.516842	2.12572	0.0335268	0.471002	CAMTA1	full-splice_match	reference_match
140348	10.9889	-2.20641	1.03829	-2.12504	0.033583	0.471002	ACTB	incomplete-splice_match	3prime_fragment
52922	17.5696	2.45796	1.15746	2.12358	0.0337049	0.471529	IFT43	incomplete-splice_match	5prime_fragment
146281	20.9234	1.92665	0.907411	2.12323	0.0337342	0.471529	BPGM	full-splice_match	alternative_5end
14219	8.51495	-1.13146	0.532934	-2.12308	0.0337468	0.471529	ENSG00000280157	full-splice_match	mono-exon
130197	6.92898	-1.52539	0.718343	-2.12348	0.0337139	0.471529	HDAC3	full-splice_match	alternative_3end
139674	15.4453	-2.24257	1.05613	-2.12339	0.0337215	0.471529	DLL1	incomplete-splice_match	3prime_fragment
34077	41.3172	-4.55259	2.1441	-2.12332	0.0337274	0.471529	MUS81	incomplete-splice_match	3prime_fragment
60995	5.80936	2.30178	1.08445	2.12254	0.0337922	0.471575	POLG	full-splice_match	alternative_3end5end
123672	13.6553	-4.06481	1.91487	-2.12276	0.0337737	0.471575	CPE	incomplete-splice_match	3prime_fragment
398314	8.18966	-3.22161	1.51815	-2.12206	0.0338327	0.471847	AKAP9	incomplete-splice_match	3prime_fragment
68995	45.4735	-1.98076	0.933528	-2.1218	0.0338548	0.47186	SAT2	novel_in_catalog	combination_of_known_junctions,intron_retention
133959	12.819	1.93863	0.913818	2.12146	0.0338829	0.471959	SNHG32	full-splice_match	alternative_5end
42843	18.1714	-1.57485	0.742442	-2.12118	0.0339067	0.471996	DDIT3	full-splice_match	reference_match
57748	18.0726	-2.08897	0.984961	-2.12086	0.0339335	0.472076	NEIL1	incomplete-splice_match	3prime_fragment
164968	19.4608	3.15804	1.49005	2.11941	0.0340555	0.472488	GTPBP6	full-splice_match	alternative_5end
82561	5.26107	1.89733	0.895122	2.11964	0.0340366	0.472488	ADM5	full-splice_match	reference_match
54210	43.7197	1.3847	0.65325	2.11972	0.0340299	0.472488	VTI1B	full-splice_match	alternative_3end
161127	15.2565	-1.00953	0.47636	-2.11926	0.0340686	0.472488	ENSG00000287700	full-splice_match	mono-exon
34358	23.4166	-1.99542	0.941524	-2.11935	0.0340608	0.472488	NDUFS8	full-splice_match	alternative_5end
8936	34.3587	2.22593	1.05051	2.11891	0.0340982	0.472606	MRPL37	full-splice_match	reference_match
55113	15.2705	1.88191	0.888374	2.11838	0.0341432	0.472937	WDR20	incomplete-splice_match	intron_retention
2530	24.4259	0.713628	0.336926	2.11805	0.0341706	0.473025	ENSG00000280944	full-splice_match	mono-exon
155192	14.2875	-0.797882	0.376877	-2.11709	0.0342521	0.47386	ENSG00000288586	full-splice_match	mono-exon
159528	11.6139	-2.032	0.959922	-2.11684	0.0342735	0.473863	STRBP	incomplete-splice_match	3prime_fragment
161348	9.1987	2.5148	1.18881	2.1154	0.0343959	0.474969	EBP	full-splice_match	reference_match
99037	23.7642	2.21817	1.04851	2.11554	0.0343843	0.474969	ILKAP	full-splice_match	alternative_5end
527998	8.76616	6.26171	2.96063	2.11499	0.0344304	0.475136	UNC45A	incomplete-splice_match	3prime_fragment
29642	13.8742	0.731329	0.345822	2.11476	0.0344505	0.475136	EEF1AKMT2	incomplete-splice_match	5prime_fragment
250566	35.179	-4.45914	2.10992	-2.11341	0.0345655	0.47643	PI4KAP1	novel_not_in_catalog	Alt5
118018	61.6361	4.45391	2.10807	2.11279	0.0346186	0.476575	NELFA	incomplete-splice_match	3prime_fragment
72870	7.38075	1.57182	0.743947	2.11282	0.0346166	0.476575	KRT17	incomplete-splice_match	intron_retention
139723	12.0713	1.71332	0.811216	2.11204	0.0346829	0.477167	PDCD2	full-splice_match	alternative_3end
37018	13.5622	-1.752	0.829803	-2.11135	0.0347427	0.477695	CCDC90B	full-splice_match	alternative_3end5end
54963	13.6735	2.28536	1.08313	2.10995	0.0348626	0.478757	MEG3	incomplete-splice_match	5prime_fragment
123562	35.2806	-0.717337	0.339959	-2.11007	0.0348526	0.478757	FBXW7	full-splice_match	alternative_3end5end
96578	156.192	-0.5672	0.268874	-2.10954	0.0348981	0.47895	SLC39A10	incomplete-splice_match	5prime_fragment
167283	6.17553	4.09106	1.94192	2.10671	0.0351425	0.479661	CLK2	incomplete-splice_match	3prime_fragment
112190	23.817	4.07727	1.93486	2.10727	0.0350942	0.479661	CADM2	incomplete-splice_match	3prime_fragment
250902	19.079	3.21496	1.52606	2.10671	0.0351426	0.479661	TNRC6B	full-splice_match	alternative_3end
246907	7.75484	1.49333	0.708679	2.1072	0.0351001	0.479661	ENSG00000279253	full-splice_match	mono-exon
54759	5.45569	1.09415	0.519292	2.107	0.0351179	0.479661	CHGA	incomplete-splice_match	5prime_fragment
54034	52.6716	1.06113	0.503611	2.10704	0.0351143	0.479661	PSMA3-AS1	full-splice_match	alternative_3end
63741	21.5824	-0.971608	0.461105	-2.10713	0.0351066	0.479661	ANKS3	full-splice_match	alternative_5end
86152	9.77604	-1.3173	0.624809	-2.10832	0.035003	0.479661	ZNF285	full-splice_match	alternative_3end
83802	5.89727	-2.02804	0.962154	-2.10782	0.0350468	0.479661	APLP1	incomplete-splice_match	3prime_fragment
523913	5.44795	-4.81276	2.2851	-2.10614	0.0351919	0.480042	NADSYN1	incomplete-splice_match	3prime_fragment
75410	17.6312	2.76146	1.31152	2.10554	0.0352442	0.480171	MTCL1	incomplete-splice_match	3prime_fragment
138025	80.923	1.0047	0.477119	2.10577	0.0352242	0.480171	CCDC28A	full-splice_match	reference_match
138565	49.6036	1.3758	0.653594	2.10497	0.035294	0.480557	KIAA0408	incomplete-splice_match	3prime_fragment
220253	8.09024	2.68829	1.27747	2.10439	0.0353445	0.48066	ACADVL	full-splice_match	alternative_3end5end
144665	5.56743	-1.38959	0.660285	-2.10454	0.0353317	0.48066	OR7E38P	full-splice_match	mono-exon
78873	12.0634	2.75112	1.30754	2.10405	0.0353745	0.480776	SHD	full-splice_match	alternative_5end
85191	5.74138	-2.14484	1.02039	-2.10198	0.0355546	0.482723	ALKBH6	full-splice_match	reference_match
163035	13.8878	-3.17159	1.50891	-2.10191	0.0355609	0.482723	PLP1	full-splice_match	alternative_3end5end
66366	9.39404	2.77571	1.32101	2.1012	0.0356238	0.483182	KIFC3	incomplete-splice_match	3prime_fragment
44738	42.426	0.523701	0.249259	2.10104	0.0356378	0.483182	DYNLL1	full-splice_match	alternative_3end5end
128936	38.0391	5.26694	2.50812	2.09996	0.0357327	0.483279	MATR3	full-splice_match	alternative_3end5end
115301	9.41241	3.29139	1.5679	2.09924	0.0357961	0.483279	GFM1	incomplete-splice_match	3prime_fragment
55762	15.0125	2.52295	1.20111	2.10051	0.0356836	0.483279	CLMN	incomplete-splice_match	3prime_fragment
106777	82.4186	1.36566	0.650207	2.10035	0.0356977	0.483279	RASL10A	full-splice_match	alternative_3end5end
9195	6.94646	-1.05435	0.502053	-2.10007	0.0357225	0.483279	LEPROT	incomplete-splice_match	5prime_fragment
40608	26.9293	-1.6104	0.767094	-2.09935	0.0357858	0.483279	AMN1	full-splice_match	reference_match
529628	9.1197	-3.44083	1.63875	-2.09967	0.035758	0.483279	MAPT	incomplete-splice_match	3prime_fragment
31532	6.27164	3.68998	1.75825	2.09867	0.0358459	0.483661	CYB5R2	full-splice_match	reference_match
195359	5.43968	4.81181	2.29398	2.09759	0.0359418	0.484567	BIRC3	incomplete-splice_match	3prime_fragment
128190	12.9455	3.3796	1.61131	2.09742	0.0359563	0.484567	CCDC112	incomplete-splice_match	3prime_fragment
132536	6.1833	-1.33091	0.635153	-2.09542	0.0361341	0.48667	CDH18	incomplete-splice_match	5prime_fragment
130170	22.8082	3.31526	1.5827	2.09469	0.0361988	0.486828	HARS1	full-splice_match	alternative_3end
65522	22.8562	-0.98505	0.470347	-2.09431	0.0362328	0.486828	ENSG00000261227	full-splice_match	mono-exon
75087	10.1155	-2.98224	1.42385	-2.09449	0.0362159	0.486828	DCXR	novel_in_catalog	combination_of_known_junctions,intron_retention
239599	9.27583	-4.24439	2.02611	-2.09484	0.036185	0.486828	CNOT11	incomplete-splice_match	3prime_fragment
141881	89.5475	1.80372	0.861371	2.09401	0.0362589	0.486887	RAPGEF5	incomplete-splice_match	internal_fragment
16320	165.851	-1.25114	0.597566	-2.09373	0.0362837	0.486928	SELENOF	full-splice_match	reference_match
87524	10.0282	2.81283	1.34539	2.09071	0.036554	0.490261	BIRC6	incomplete-splice_match	3prime_fragment
92318	11.7862	2.78795	1.33397	2.08996	0.0366212	0.490869	MITD1	novel_in_catalog	combination_of_known_junctions,intron_retention
71170	6.55681	2.83467	1.3572	2.08862	0.0367416	0.4916	TAF15	full-splice_match	alternative_3end
42385	9.483	-1.34536	0.644067	-2.08886	0.0367206	0.4916	CALCOCO1	full-splice_match	alternative_3end
434923	12.7472	-3.10162	1.48496	-2.08869	0.0367358	0.4916	OXA1L	incomplete-splice_match	3prime_fragment
151447	7.64143	5.05989	2.4242	2.08724	0.0368663	0.49268	ATP6V1C1	incomplete-splice_match	3prime_fragment
150864	361.799	1.49515	0.716303	2.08732	0.0368592	0.49268	CA2	full-splice_match	alternative_3end
118704	1650.32	1.3079	0.626748	2.08681	0.0369052	0.492906	QDPR	full-splice_match	alternative_3end5end
155782	135.108	0.925846	0.444128	2.08464	0.037102	0.495239	ENSG00000289159	full-splice_match	mono-exon
116983	19.476	1.31661	0.631765	2.08402	0.0371583	0.495695	ENSG00000290021	full-splice_match	mono-exon
118119	21.0037	-0.842301	0.40443	-2.08269	0.0372799	0.497021	ABCA11P	full-splice_match	mono-exon
3718	11.9791	-2.74903	1.32018	-2.08232	0.0373134	0.497171	GSTT1	full-splice_match	alternative_3end5end
200350	11.541	-2.5701	1.23463	-2.08168	0.0373717	0.497652	SLC11A2	incomplete-splice_match	3prime_fragment
235956	85.324	3.72109	1.78815	2.08097	0.0374363	0.498095	VSNL1	novel_not_in_catalog	Alt3
146227	6.88352	-4.30747	2.07007	-2.08083	0.0374494	0.498095	MEST	incomplete-splice_match	3prime_fragment
89035	14.8156	-0.77252	0.371484	-2.07955	0.0375669	0.499361	ENSG00000272702	full-splice_match	reference_match
8762	16.1967	3.62744	1.74513	2.0786	0.0376538	0.499893	ELAVL4	incomplete-splice_match	3prime_fragment
115533	6.90128	2.19944	1.05825	2.07837	0.0376751	0.499893	SLC33A1	incomplete-splice_match	3prime_fragment
97578	23.5202	2.09944	1.01009	2.07847	0.037666	0.499893	NDUFS1	incomplete-splice_match	3prime_fragment
48317	10.208	-0.665361	0.320202	-2.07794	0.0377148	0.499893	GPALPP1	incomplete-splice_match	5prime_fragment
67870	22.8051	-5.52709	2.65994	-2.0779	0.0377185	0.499893	TNFSF12	full-splice_match	alternative_5end
114399	96.5092	1.74664	0.840684	2.07764	0.0377426	0.499917	CNBP	full-splice_match	alternative_3end
3908	39.7899	-1.3232	0.63702	-2.07717	0.0377861	0.500197	HERC2P9	full-splice_match	mono-exon
140810	9.96672	-3.22646	1.55359	-2.07678	0.0378221	0.500377	CBX3	incomplete-splice_match	3prime_fragment
342214	5.51543	5.16461	2.4873	2.07639	0.0378575	0.50055	SULT1A3	incomplete-splice_match	3prime_fragment
106551	6.28155	-2.76496	1.33223	-2.07545	0.0379452	0.501414	THAP7	full-splice_match	alternative_3end
53076	8.06528	3.2544	1.56853	2.0748	0.0380047	0.501592	NRXN3	incomplete-splice_match	3prime_fragment
89307	16.0214	0.829389	0.39985	2.07425	0.0380558	0.501592	SPTBN1	incomplete-splice_match	5prime_fragment
30954	7.23804	-0.99743	0.480741	-2.07478	0.0380072	0.501592	PDHX	incomplete-splice_match	5prime_fragment
160783	33.9773	-1.42466	0.686811	-2.07431	0.0380504	0.501592	AP1S2	incomplete-splice_match	5prime_fragment
43958	23.6702	-3.76105	1.81335	-2.07409	0.0380706	0.501592	HSP90B1	full-splice_match	alternative_3end
111019	68.9543	1.94297	0.937169	2.07323	0.0381507	0.502351	FAM107A	full-splice_match	alternative_3end
262378	38.2979	3.6437	1.75799	2.07266	0.0382042	0.502627	CCNI	incomplete-splice_match	3prime_fragment
130493	28.9875	0.91093	0.439557	2.07238	0.0382298	0.502627	ATOX1	novel_in_catalog	combination_of_known_splicesites
92458	6.70961	-1.47683	0.712659	-2.07228	0.038239	0.502627	ANKRD36C	novel_in_catalog	combination_of_known_junctions,intron_retention
71918	40.2269	-2.20569	1.06476	-2.07153	0.0383093	0.503257	SLC25A39	full-splice_match	reference_match
221684	11.887	2.19409	1.05933	2.07122	0.0383386	0.503346	LINC02693	full-splice_match	alternative_3end
86534	95.9816	0.872513	0.421346	2.07077	0.0383799	0.503592	KDELR1	full-splice_match	alternative_5end
34752	8.3216	-1.70871	0.825269	-2.07049	0.0384063	0.503644	C11orf87	full-splice_match	alternative_3end5end
53213	33.1757	0.895698	0.432693	2.07005	0.0384473	0.503887	ZBTB1	full-splice_match	alternative_3end5end
17259	8.95771	-1.14489	0.553234	-2.06945	0.0385042	0.504338	TMEM167B	full-splice_match	alternative_3end
285470	21.6024	2.18295	1.05508	2.06899	0.0385466	0.504598	FGFR1	incomplete-splice_match	3prime_fragment
63540	8.16842	1.42736	0.690119	2.06827	0.0386142	0.505187	ELOB	incomplete-splice_match	intron_retention
93871	7.83539	3.50531	1.69517	2.06782	0.0386565	0.505445	SLC4A10	incomplete-splice_match	3prime_fragment
62326	41.2104	2.47395	1.19689	2.06698	0.0387358	0.505891	CORO1A	full-splice_match	reference_match
153852	9.88755	-1.46926	0.710817	-2.06701	0.0387336	0.505891	CCDC171	incomplete-splice_match	5prime_fragment
155792	36.7792	3.26257	1.57893	2.06632	0.0387985	0.50612	ZFAND5	full-splice_match	alternative_3end5end
104327	12.6073	-1.47155	0.712097	-2.0665	0.0387812	0.50612	ATP5PF	full-splice_match	alternative_3end
19015	7.95764	-3.61577	1.75014	-2.06598	0.0388302	0.506239	ARHGEF10L	full-splice_match	alternative_5end
4417	7.32158	0.884682	0.428275	2.06569	0.0388581	0.506308	KAT6B	full-splice_match	alternative_3end
61967	1340.31	1.41962	0.687431	2.06512	0.0389121	0.506422	ATP6V0C	full-splice_match	alternative_5end
161361	24.577	-4.26554	2.0654	-2.06523	0.0389008	0.506422	RBM3	full-splice_match	alternative_3end
123574	5.36186	4.13916	2.00509	2.06432	0.0389871	0.506809	MAP9	incomplete-splice_match	internal_fragment
67430	34.248	-1.47068	0.71235	-2.06455	0.0389656	0.506809	ENSG00000289551	full-splice_match	mono-exon
54951	1957.15	2.01006	0.973914	2.0639	0.0390272	0.507037	MEG3	full-splice_match	reference_match
49279	7.96073	-4.39579	2.13017	-2.06359	0.0390568	0.507127	NEK3	incomplete-splice_match	3prime_fragment
130123	18.4954	-0.570495	0.276618	-2.06239	0.0391702	0.50801	DNAJC18	incomplete-splice_match	3prime_fragment
135250	102.75	-0.719871	0.349028	-2.0625	0.0391599	0.50801	GSTA4	incomplete-splice_match	5prime_fragment
20514	399.595	0.945747	0.458655	2.062	0.0392075	0.5082	S100A6	full-splice_match	alternative_5end
409	14.6712	4.08522	1.98195	2.06121	0.0392828	0.508882	RING1	full-splice_match	reference_match
443272	25.8488	5.06805	2.45983	2.06032	0.0393678	0.508948	SPOP	incomplete-splice_match	3prime_fragment
177916	5.19166	2.36885	1.14981	2.06021	0.0393788	0.508948	MRPS15	incomplete-splice_match	3prime_fragment
132881	5.27138	1.66695	0.809059	2.06035	0.0393648	0.508948	SERPINB1	incomplete-splice_match	5prime_fragment
50203	15.2924	-0.923303	0.448019	-2.06085	0.0393169	0.508948	ENSG00000289878	full-splice_match	mono-exon
139836	13.7386	-0.598225	0.290408	-2.05994	0.0394039	0.508978	SUN1	incomplete-splice_match	5prime_fragment
72303	15.4664	0.662985	0.321903	2.05958	0.0394388	0.509136	ANKRD40	full-splice_match	alternative_3end5end
151530	14.2141	-1.76931	0.859232	-2.05917	0.0394779	0.509346	ENSG00000288752	full-splice_match	mono-exon
282141	8.74276	3.171	1.54016	2.05887	0.0395066	0.509423	SAP25	full-splice_match	alternative_5end
54935	10.9672	3.70809	1.80196	2.05781	0.0396085	0.509564	WDR25	full-splice_match	alternative_3end
267524	6.74732	2.5771	1.25197	2.05843	0.0395485	0.509564	SLC30A5	incomplete-splice_match	3prime_fragment
134539	31.3317	1.42835	0.694085	2.05789	0.0396003	0.509564	ILRUN-AS1	full-splice_match	mono-exon
247583	15.9471	-3.20723	1.55834	-2.05811	0.0395795	0.509564	ZMYND8	incomplete-splice_match	3prime_fragment
398523	51.6894	4.1666	2.02532	2.05725	0.0396621	0.509668	GTF2IP4	incomplete-splice_match	3prime_fragment
84739	10.436	-1.32113	0.642178	-2.05726	0.039661	0.509668	PNKP	full-splice_match	reference_match
283476	5.21125	3.22613	1.56849	2.05684	0.0397021	0.50989	NUB1	incomplete-splice_match	3prime_fragment
521259	20.1141	-3.9939	1.94256	-2.056	0.0397829	0.510634	RGS7	incomplete-splice_match	3prime_fragment
92572	13.4347	1.27741	0.621523	2.0553	0.0398504	0.511208	SOWAHC	full-splice_match	mono-exon
144396	6.49817	1.13244	0.551408	2.05372	0.0400028	0.512576	KRIT1	full-splice_match	alternative_3end
106892	9.84001	-3.68918	1.79626	-2.05381	0.0399943	0.512576	PIK3IP1	full-splice_match	reference_match
123262	628.175	0.634415	0.308967	2.05334	0.0400397	0.512756	SCOC	full-splice_match	alternative_3end5end
146724	13.0189	2.62055	1.27717	2.05184	0.040185	0.514028	LINC-PINT	full-splice_match	reference_match
46319	24.7586	-1.86265	0.907771	-2.05189	0.0401802	0.514028	MAPKAPK5-AS1	full-splice_match	reference_match
65923	74.4178	1.14982	0.560675	2.05078	0.0402888	0.515062	RPL13	incomplete-splice_match	5prime_fragment
171446	9.70563	-2.19765	1.07192	-2.0502	0.0403449	0.515485	ENSG00000291583	full-splice_match	alternative_3end5end
54177	7.12097	1.10373	0.538565	2.04939	0.0404235	0.516195	YBX1P1	full-splice_match	mono-exon
61602	23.5134	0.682515	0.333105	2.04895	0.0404674	0.516461	ITPRIPL2	full-splice_match	mono-exon
122043	41.7851	1.28852	0.629256	2.04769	0.0405905	0.517442	BDH2	full-splice_match	alternative_3end
58644	643.865	1.10056	0.537461	2.04771	0.0405887	0.517442	NGRN	full-splice_match	alternative_3end
324500	8.65771	-2.54235	1.2422	-2.04666	0.0406916	0.518436	DYNC2H1	full-splice_match	alternative_3end
199636	5.46671	3.33258	1.62961	2.04501	0.0408536	0.520204	YEATS4	full-splice_match	alternative_3end
80067	13.2654	3.69374	1.80686	2.04428	0.0409255	0.520824	TMEM38A	full-splice_match	alternative_3end
156162	18.475	-1.06358	0.520697	-2.0426	0.0410918	0.522643	SECISBP2	incomplete-splice_match	5prime_fragment
265517	10.1715	3.73641	1.82992	2.04184	0.0411673	0.522713	ICE1	incomplete-splice_match	3prime_fragment
72255	16.9098	2.24329	1.09861	2.04193	0.0411585	0.522713	SLC35B1	full-splice_match	alternative_5end
136117	92.6881	0.911334	0.446315	2.04191	0.0411607	0.522713	POU3F2	full-splice_match	mono-exon
264604	5.52599	3.76413	1.84431	2.04094	0.0412569	0.523063	RXFP1	incomplete-splice_match	3prime_fragment
162215	10.9041	3.02968	1.48458	2.04077	0.0412738	0.523063	NONO	incomplete-splice_match	3prime_fragment
112196	16.3421	2.81186	1.37769	2.041	0.0412506	0.523063	CADM2	incomplete-splice_match	3prime_fragment
47845	12.7145	-1.08362	0.531024	-2.04062	0.0412883	0.523063	ZMYM5	incomplete-splice_match	5prime_fragment
98121	14.5397	-1.32704	0.650462	-2.04016	0.0413348	0.523069	EPHA4	full-splice_match	alternative_3end
157342	5.40703	-1.32823	0.651047	-2.04015	0.0413355	0.523069	ALAD	full-splice_match	alternative_3end
21955	9.29607	0.962536	0.472052	2.03904	0.0414456	0.524166	DNM3	incomplete-splice_match	5prime_fragment
136904	7.48861	3.43835	1.68654	2.0387	0.0414797	0.524301	COL9A1	incomplete-splice_match	3prime_fragment
146258	9.05717	1.90967	0.936891	2.03831	0.0415193	0.524314	MKLN1	incomplete-splice_match	5prime_fragment
127924	17.5878	1.06628	0.523144	2.03822	0.0415275	0.524314	SRP19	full-splice_match	alternative_3end
159194	7.98694	1.83763	0.901824	2.03768	0.0415815	0.524699	CARD9	incomplete-splice_match	intron_retention
137461	9.65325	4.79347	2.35439	2.03597	0.0417535	0.526488	SESN1	incomplete-splice_match	3prime_fragment
133200	9.69093	3.72148	1.82821	2.03558	0.0417921	0.526488	CAP2	incomplete-splice_match	3prime_fragment
4744	20.147	1.12633	0.55345	2.0351	0.0418408	0.526488	ID3	full-splice_match	alternative_5end
1879	7.29943	-1.57414	0.773405	-2.03534	0.0418163	0.526488	GIHCG	full-splice_match	mono-exon
6871	5.63129	-2.08916	1.02645	-2.03532	0.0418191	0.526488	ANKRD36B	incomplete-splice_match	5prime_fragment
134201	10.3879	2.41386	1.18636	2.03467	0.0418837	0.526733	RPL7L1	novel_in_catalog	combination_of_known_splicesites
436847	34.8118	3.84405	1.8902	2.03367	0.041985	0.527119	MEG3	incomplete-splice_match	3prime_fragment
137119	7.49453	1.99588	0.981404	2.0337	0.041982	0.527119	UBE3D	incomplete-splice_match	3prime_fragment
170273	5.69726	2.23944	1.10096	2.03407	0.0419444	0.527119	MIR124-1HG	novel_in_catalog	combination_of_known_junctions,intron_retention
26390	6.86695	-1.10884	0.545393	-2.0331	0.0420422	0.527542	FAM13C	full-splice_match	alternative_3end5end
40966	8.35196	1.57452	0.77463	2.03261	0.0420916	0.527569	CNTN1	incomplete-splice_match	3prime_fragment
63227	11.1203	1.25628	0.618051	2.03265	0.0420881	0.527569	GPRC5B	full-splice_match	alternative_5end
159501	20.2926	1.47258	0.724769	2.03179	0.0421746	0.527733	PDCL	full-splice_match	alternative_3end
157281	6.90842	1.44488	0.710991	2.0322	0.0421331	0.527733	ENSG00000275318	full-splice_match	mono-exon
117783	8.7578	-3.3835	1.66543	-2.03161	0.0421933	0.527733	NSG1	full-splice_match	alternative_3end5end
97225	12.5017	-4.42159	2.17646	-2.03155	0.0421989	0.527733	RFTN2	incomplete-splice_match	3prime_fragment
86165	6.3299	1.35765	0.668479	2.03096	0.0422594	0.5279	ENSG00000280106	full-splice_match	mono-exon
100014	98.9833	0.716703	0.352873	2.03105	0.04225	0.5279	CENPB	full-splice_match	mono-exon
145194	15.9699	3.18766	1.56972	2.03072	0.0422835	0.527907	SRPK2	incomplete-splice_match	5prime_fragment
103044	18.602	3.8578	1.90034	2.03006	0.0423504	0.528449	UCKL1	incomplete-splice_match	intron_retention
47858	10.2877	2.92699	1.44276	2.02874	0.0424852	0.52954	CRYL1	full-splice_match	reference_match
9800	6.69906	0.988774	0.487334	2.02895	0.0424637	0.52954	MAP7D1	incomplete-splice_match	3prime_fragment
352120	6.73322	3.43528	1.69476	2.02699	0.0426631	0.531252	SMAD2	incomplete-splice_match	3prime_fragment
31124	57.4576	1.17959	0.581972	2.02688	0.0426748	0.531252	C11orf96	full-splice_match	mono-exon
68401	21.7627	-0.579944	0.286153	-2.02669	0.0426937	0.531252	PAFAH1B1	full-splice_match	alternative_3end5end
5266	5.48196	3.4502	1.70262	2.0264	0.0427235	0.531327	METTL9	novel_not_in_catalog	Alt3
51403	14.2853	3.55864	1.75727	2.02509	0.0428577	0.532701	METTL3	full-splice_match	reference_match
60811	17.4578	1.86083	0.91941	2.02393	0.0429769	0.533886	AP3B2	incomplete-splice_match	3prime_fragment
123215	15.9107	2.36654	1.16977	2.02309	0.0430641	0.534673	TMEM144	incomplete-splice_match	3prime_fragment
81171	7.74234	-1.16578	0.576411	-2.02248	0.0431265	0.534855	NDUFA7	incomplete-splice_match	intron_retention
79205	25.2073	-1.91084	0.944767	-2.02255	0.04312	0.534855	TGFBR3L	full-splice_match	alternative_5end
67781	5.51538	1.6082	0.795641	2.02126	0.043253	0.536127	C17orf49	full-splice_match	reference_match
151883	13.1241	-0.955505	0.472874	-2.02063	0.0433177	0.536631	NCALD	incomplete-splice_match	5prime_fragment
23259	1093.75	2.26456	1.12125	2.01967	0.0434179	0.537233	GLUL	full-splice_match	alternative_3end
49947	5.37645	-1.3051	0.646307	-2.01931	0.0434549	0.537233	PCCA	full-splice_match	mono-exon
76719	5.74863	-1.9218	0.951646	-2.01945	0.0434407	0.537233	RPRD1A	full-splice_match	alternative_3end
93877	6.82681	4.27594	2.11784	2.01901	0.0434862	0.537233	GCA	novel_in_catalog	combination_of_known_junctions
228403	38.5478	-2.37109	1.17438	-2.01902	0.043485	0.537233	NARS1	incomplete-splice_match	3prime_fragment
109258	18.8043	1.69211	0.839057	2.01668	0.0437293	0.53853	CYB561D2	full-splice_match	reference_match
159431	16.8957	1.46924	0.72841	2.01705	0.0436904	0.53853	PHF19	full-splice_match	alternative_5end
130435	8.86482	-1.06776	0.52944	-2.01677	0.0437194	0.53853	PPP2R2B	incomplete-splice_match	5prime_fragment
101833	11.2113	-2.44065	1.21027	-2.01662	0.0437354	0.53853	RBM39	full-splice_match	alternative_5end
120702	5.19878	-2.44908	1.21424	-2.01697	0.0436989	0.53853	COPS4	incomplete-splice_match	3prime_fragment
131843	7.87308	-2.47565	1.2272	-2.0173	0.0436637	0.53853	MRNIP	full-splice_match	reference_match
51570	12.3931	0.905655	0.449208	2.01611	0.043788	0.538881	ENSG00000289111	full-splice_match	mono-exon
26641	5.85256	-4.62516	2.29572	-2.01469	0.0439375	0.540424	HERC4	incomplete-splice_match	3prime_fragment
144033	6.78268	2.19009	1.08748	2.01392	0.0440179	0.540522	MBLAC1	full-splice_match	alternative_3end5end
22899	485.637	1.2067	0.599128	2.01409	0.0440002	0.540522	ENO1	full-splice_match	reference_match
52637	47.281	-4.13214	2.05132	-2.01438	0.0439697	0.540522	KLHDC2	full-splice_match	alternative_3end
91647	9.45281	-3.03519	1.50823	-2.01241	0.0441764	0.542083	UNC50	novel_in_catalog	combination_of_known_splicesites
218327	9.34315	-4.16883	2.07173	-2.01225	0.0441934	0.542083	NUP93	full-splice_match	reference_match
78754	80.4764	1.69992	0.844982	2.01178	0.0442429	0.542393	GADD45B	full-splice_match	alternative_3end
92613	5.53496	-1.63465	0.812902	-2.01089	0.0443372	0.543252	ENSG00000231536	full-splice_match	alternative_3end5end
14711	35.2564	-1.89812	0.944409	-2.00985	0.044447	0.544299	EPRS1	full-splice_match	alternative_3end5end
402392	26.6472	4.87348	2.42514	2.00956	0.0444776	0.544376	GPAT4	incomplete-splice_match	3prime_fragment
97826	6.62042	3.23758	1.61181	2.00866	0.0445733	0.54525	ZFAND2B	incomplete-splice_match	intron_retention
46648	19.8408	1.5678	0.780692	2.00822	0.0446204	0.545407	SRSF9	full-splice_match	mono-exon
18564	17.5994	-3.90351	1.9439	-2.00808	0.0446348	0.545407	SLC45A1	full-splice_match	alternative_5end
239107	7.58992	-2.73779	1.36427	-2.00678	0.0447732	0.546799	USP39	incomplete-splice_match	3prime_fragment
95904	7.37349	-1.07975	0.538172	-2.00633	0.0448214	0.54709	DUSP19	full-splice_match	alternative_3end
124782	6.53942	3.33547	1.66268	2.00608	0.0448472	0.547107	CPLANE1	incomplete-splice_match	3prime_fragment
51475	10.594	1.30311	0.649751	2.00555	0.0449038	0.547313	FKBP1BP1	full-splice_match	mono-exon
113765	33.1509	-0.741603	0.369791	-2.00547	0.044913	0.547313	ENSG00000291042	full-splice_match	alternative_5end
51055	7.07031	1.25824	0.627484	2.00521	0.0449403	0.547348	NDRG2	incomplete-splice_match	5prime_fragment
156514	7.48112	3.5609	1.77713	2.00374	0.0450983	0.548378	TMOD1	full-splice_match	alternative_3end
128790	5.96822	1.8836	0.940024	2.00378	0.0450936	0.548378	SMAD5	incomplete-splice_match	5prime_fragment
474594	19.0009	-4.82683	2.40873	-2.00389	0.0450822	0.548378	PRKDC	incomplete-splice_match	3prime_fragment
53998	111.392	1.0974	0.547762	2.00343	0.0451314	0.548483	DHRS7	full-splice_match	alternative_3end
40965	26.0026	4.50271	2.24862	2.00243	0.0452387	0.549489	CNTN1	incomplete-splice_match	3prime_fragment
34235	30.833	2.59857	1.29845	2.00129	0.0453616	0.550536	RBM4	full-splice_match	reference_match
115834	5.73241	-2.16854	1.08364	-2.00117	0.0453741	0.550536	SLC7A14-AS1	novel_in_catalog	combination_of_known_junctions
199632	8.19756	3.17723	1.58988	1.99841	0.0456725	0.550649	CPSF6	incomplete-splice_match	3prime_fragment
78138	7.49182	2.87445	1.43839	1.99839	0.0456748	0.550649	DAZAP1	full-splice_match	alternative_3end5end
60301	6.68969	2.20339	1.10217	1.99914	0.0455927	0.550649	HEXA	full-splice_match	alternative_3end5end
46251	66.6379	1.74238	0.87184	1.99851	0.0456614	0.550649	PPP1CC	full-splice_match	alternative_3end
140779	9.51148	1.65578	0.828132	1.99942	0.0455631	0.550649	RAMP3	full-splice_match	reference_match
94633	83.9631	1.47247	0.735977	2.0007	0.0454251	0.550649	CCDC115	full-splice_match	alternative_3end5end
37848	21.7423	1.12149	0.561207	1.99835	0.0456785	0.550649	CADM1	full-splice_match	alternative_3end5end
102709	22.2194	1.00114	0.500882	1.99875	0.0456355	0.550649	RPS21	full-splice_match	alternative_5end
140727	7.7529	0.768437	0.384521	1.99843	0.0456706	0.550649	OGDH	incomplete-splice_match	5prime_fragment
156409	5.79053	-2.60873	1.30447	-1.99983	0.0455184	0.550649	AOPEP	full-splice_match	alternative_3end
492924	7.15086	-3.39541	1.69791	-1.99976	0.0455261	0.550649	PPP2R3C	full-splice_match	alternative_3end5end
528594	18.6927	-5.39116	2.69621	-1.99953	0.0455505	0.550649	EIF3CL	incomplete-splice_match	3prime_fragment
77412	20.5972	1.92901	0.965458	1.99802	0.0457143	0.550785	TCF4	incomplete-splice_match	3prime_fragment
85227	20.6228	1.83785	0.920075	1.9975	0.0457705	0.551166	TMEM86B	full-splice_match	mono-exon
6680	13.4296	2.47636	1.2401	1.99689	0.0458367	0.551428	FAHD2A	full-splice_match	alternative_3end
98790	5.80098	-0.798769	0.400015	-1.99685	0.0458416	0.551428	ENSG00000289555	full-splice_match	mono-exon
223427	16.3824	3.89203	1.94955	1.99637	0.0458931	0.551456	PGS1	full-splice_match	alternative_3end
118290	6.33868	-2.55425	1.27934	-1.99653	0.0458767	0.551456	ATP5ME	novel_in_catalog	combination_of_known_junctions,intron_retention
25868	78.6602	1.04654	0.524628	1.99482	0.0460628	0.553198	ADIRF	full-splice_match	alternative_3end5end
200087	9.86376	4.75022	2.38208	1.99415	0.0461357	0.553224	RAPGEF3	full-splice_match	alternative_5end
155128	6.29744	2.07951	1.04274	1.99426	0.0461233	0.553224	CCL27	incomplete-splice_match	3prime_fragment
50743	20.1297	1.53189	0.768205	1.99412	0.046139	0.553224	THTPA	full-splice_match	alternative_3end
80334	5.72591	2.86636	1.43789	1.99344	0.0462131	0.553816	SUGP2	incomplete-splice_match	3prime_fragment
26914	9.15404	-3.42846	1.72007	-1.99321	0.0462381	0.553819	DNAJC9	full-splice_match	alternative_3end
238258	7.36315	-4.37911	2.19859	-1.99178	0.0463949	0.5554	PPP3R1	incomplete-splice_match	3prime_fragment
99331	55.0231	2.93356	1.4733	1.99115	0.0464641	0.555931	NRSN2	full-splice_match	alternative_5end
41844	101.929	0.57971	0.291223	1.99061	0.0465243	0.556354	LINC00938	full-splice_match	mono-exon
516558	14.0486	-3.62758	1.82258	-1.99035	0.0465523	0.556392	DNM1	novel_not_in_catalog	partial_intron_retention
20770	8.37447	2.861	1.4377	1.98998	0.0465928	0.556579	SCAMP3	full-splice_match	alternative_5end
201885	21.5338	5.38966	2.70895	1.98958	0.0466375	0.55676	TXNRD1	incomplete-splice_match	3prime_fragment
156634	46.7074	3.25603	1.63669	1.98939	0.0466576	0.55676	CARD19	full-splice_match	alternative_3end5end
334315	8.65933	4.21013	2.11724	1.98849	0.0467573	0.557471	MIA2	incomplete-splice_match	3prime_fragment
154733	51.3974	2.62393	1.32037	1.98728	0.0468915	0.557471	GRHPR	full-splice_match	alternative_3end
146576	93.3264	1.61047	0.810224	1.98769	0.0468462	0.557471	ENSG00000279419	full-splice_match	mono-exon
120872	7.97382	1.43035	0.719702	1.98742	0.0468758	0.557471	SPP1	incomplete-splice_match	5prime_fragment
400	6.38676	0.929921	0.467813	1.98781	0.0468332	0.557471	C6orf47	full-splice_match	mono-exon
126809	25.5384	-0.668715	0.336405	-1.98783	0.046831	0.557471	PLK2	full-splice_match	alternative_3end
513981	26.2231	-5.62376	2.82953	-1.98753	0.0468639	0.557471	AGAP3	incomplete-splice_match	3prime_fragment
114200	17.7396	-1.37529	0.692131	-1.98704	0.0469183	0.557493	HSPBAP1	full-splice_match	alternative_5end
75899	5.72744	1.62354	0.817289	1.9865	0.0469778	0.557905	EPB41L3	incomplete-splice_match	internal_fragment
110570	15.9595	0.845299	0.425614	1.98607	0.0470256	0.558177	EBLN2	full-splice_match	mono-exon
136710	9.80918	2.46238	1.24037	1.98521	0.0471215	0.559019	ADGRB3-DT	full-splice_match	alternative_5end
34424	37.5366	3.01472	1.52009	1.98326	0.0473384	0.559843	TMEM109	full-splice_match	alternative_5end
137447	6.77721	1.48316	0.747846	1.98324	0.0473409	0.559843	SNX3	full-splice_match	alternative_3end5end
155857	25.6931	0.944648	0.476057	1.98432	0.0472206	0.559843	C9orf40	full-splice_match	alternative_3end
129158	9.29034	0.709977	0.357948	1.98346	0.047316	0.559843	PCDHGB7	full-splice_match	mono-exon
18762	28.9358	-1.83457	0.924627	-1.98412	0.0472426	0.559843	TARDBP	full-splice_match	mono-exon
98936	6.71636	-2.47801	1.24907	-1.98388	0.0472693	0.559843	NCL	incomplete-splice_match	3prime_fragment
90571	25.5899	2.6791	1.35122	1.98273	0.0473978	0.559925	CCDC88A	incomplete-splice_match	internal_fragment
29946	6.10432	2.44775	1.23451	1.98277	0.0473929	0.559925	TUBGCP2	full-splice_match	alternative_5end
49820	14.2448	2.61098	1.31729	1.98209	0.0474693	0.560473	MBNL2	incomplete-splice_match	5prime_fragment
128905	10.8458	2.90659	1.46678	1.98162	0.0475221	0.5608	MATR3	incomplete-splice_match	5prime_fragment
55175	16.4357	-0.864313	0.436305	-1.98098	0.0475931	0.561343	ENSG00000289207	full-splice_match	mono-exon
69028	6.76397	1.59388	0.804975	1.98004	0.0476992	0.561377	NAA38	full-splice_match	reference_match
2588	5.53893	0.8894	0.449228	1.97984	0.0477213	0.561377	FAM120B	incomplete-splice_match	5prime_fragment
21077	5.25646	-0.961234	0.485485	-1.97995	0.0477097	0.561377	ISG20L2	incomplete-splice_match	5prime_fragment
91355	15.7316	-1.50745	0.76119	-1.98038	0.0476609	0.561377	DNAH6	incomplete-splice_match	5prime_fragment
427843	9.18847	-4.3786	2.21125	-1.98015	0.047687	0.561377	SERPING1	incomplete-splice_match	3prime_fragment
71648	23.1356	1.2746	0.644064	1.97899	0.0478171	0.562002	RPL27	full-splice_match	reference_match
27063	5.5485	1.20832	0.610664	1.9787	0.0478497	0.562002	NDST2	full-splice_match	alternative_5end
149175	8.26289	-0.709278	0.358452	-1.97872	0.0478473	0.562002	SARAF	incomplete-splice_match	5prime_fragment
191273	24.3052	5.79744	2.93062	1.97823	0.047903	0.562029	EIF4G2	incomplete-splice_match	3prime_fragment
159934	5.48579	1.247	0.630486	1.97784	0.0479467	0.562029	MEGF9	incomplete-splice_match	5prime_fragment
73452	21.2721	-0.984736	0.497897	-1.97779	0.0479524	0.562029	STRADA	full-splice_match	reference_match
27963	14.1626	-1.34813	0.681553	-1.97803	0.0479258	0.562029	NOC3L	incomplete-splice_match	5prime_fragment
632030	10.9139	-4.92168	2.48892	-1.97744	0.0479925	0.562204	RANBP2	incomplete-splice_match	3prime_fragment
461115	7.86314	3.0561	1.54585	1.97696	0.0480458	0.562507	MAP3K13	incomplete-splice_match	3prime_fragment
159655	49.8096	1.87913	0.950612	1.97676	0.0480685	0.562507	CDK5RAP2	full-splice_match	alternative_5end
79535	6.54091	0.786407	0.398097	1.97542	0.0482209	0.563996	DNM2	incomplete-splice_match	5prime_fragment
81801	14.4812	-2.46965	1.25058	-1.97481	0.0482897	0.564506	STX10	incomplete-splice_match	intron_retention
93670	5.21058	1.55274	0.786548	1.97412	0.0483677	0.565008	FMNL2	incomplete-splice_match	5prime_fragment
151182	7.51586	1.37473	0.69643	1.97396	0.0483858	0.565008	ENSG00000289502	full-splice_match	mono-exon
54155	11.6285	-2.0166	1.0217	-1.97377	0.0484084	0.565008	MAX	full-splice_match	reference_match
25974	6.46744	-2.28014	1.15556	-1.97319	0.0484741	0.565481	TMEM254	full-splice_match	alternative_3end
474089	10.8105	4.39702	2.22956	1.97215	0.0485923	0.566207	CCAR2	incomplete-splice_match	3prime_fragment
384925	17.8987	4.22197	2.14053	1.9724	0.048564	0.566207	DCK	incomplete-splice_match	3prime_fragment
6772	7.59112	0.736013	0.373236	1.97198	0.0486122	0.566207	RAB6C	full-splice_match	mono-exon
150594	12.8039	-1.98535	1.00709	-1.97137	0.0486814	0.566718	ENSG00000253636	novel_not_in_catalog	partial_intron_retention
90183	56.2043	-1.55231	0.787578	-1.97099	0.0487246	0.566927	KCNK12	full-splice_match	alternative_3end
477614	16.2685	3.93976	2.00028	1.9696	0.0488839	0.566995	SLC44A1	incomplete-splice_match	3prime_fragment
10115	8.94743	3.81016	1.93455	1.96953	0.0488923	0.566995	ZMPSTE24	incomplete-splice_match	3prime_fragment
275460	5.84464	3.40646	1.72924	1.96992	0.0488472	0.566995	PREP	incomplete-splice_match	3prime_fragment
28270	10.0227	2.50224	1.27071	1.96917	0.0489339	0.566995	BLOC1S2	full-splice_match	alternative_3end
22558	10.4425	2.4805	1.25949	1.96944	0.0489022	0.566995	COPA	incomplete-splice_match	3prime_fragment
83056	31.766	1.56044	0.792518	1.96896	0.0489575	0.566995	ZNF667-AS1	full-splice_match	alternative_5end
82348	20.6008	1.24312	0.631359	1.96895	0.0489583	0.566995	ENSG00000280061	full-splice_match	mono-exon
97425	119.625	0.906317	0.460272	1.96909	0.0489426	0.566995	SUMO1	full-splice_match	reference_match
92400	7.84005	-2.72631	1.38411	-1.96973	0.0488698	0.566995	RNF149	incomplete-splice_match	3prime_fragment
92187	5.47412	-2.04436	1.03863	-1.96832	0.0490315	0.56755	ANKRD36B	incomplete-splice_match	internal_fragment
320620	24.1849	4.66848	2.37395	1.96655	0.0492355	0.569616	EIF4G2	incomplete-splice_match	3prime_fragment
85111	10.8827	-1.5163	0.771316	-1.96586	0.0493153	0.570245	ZNF702P	full-splice_match	mono-exon
53783	7.4099	0.90671	0.461498	1.96471	0.0494475	0.571479	MAP4K5	incomplete-splice_match	5prime_fragment
113106	11.8424	-3.55197	1.80834	-1.96422	0.0495049	0.571847	ZBTB38	incomplete-splice_match	5prime_fragment
47777	1074.17	1.12689	0.57407	1.96299	0.0496474	0.572914	AMER2	full-splice_match	mono-exon
95615	5.83371	-1.00031	0.509589	-1.96298	0.0496484	0.572914	OLA1	incomplete-splice_match	5prime_fragment
36689	48.1192	5.14907	2.62497	1.96158	0.0498119	0.574504	DHCR7	full-splice_match	alternative_3end
217439	11.2527	3.91674	1.99805	1.96028	0.0499632	0.574769	NOMO2	incomplete-splice_match	internal_fragment
15355	10.1712	1.95459	0.996671	1.96112	0.0498646	0.574769	CCSAP	full-splice_match	alternative_3end
146051	67.2516	1.40164	0.714787	1.96093	0.0498877	0.574769	HILPDA	full-splice_match	reference_match
3878	5.3935	-2.69591	1.37508	-1.96055	0.0499319	0.574769	TAS2R19	full-splice_match	mono-exon
230047	10.507	-3.98998	2.0354	-1.96029	0.0499619	0.574769	SMARCA4	full-splice_match	alternative_3end5end
96935	43.9856	-0.710147	0.362348	-1.95985	0.0500134	0.575051	FASTKD2	incomplete-splice_match	5prime_fragment
141578	48.2344	1.02596	0.523603	1.95943	0.0500629	0.575093	MRPS24	full-splice_match	reference_match
7637	5.57691	-0.862284	0.44008	-1.95938	0.0500684	0.575093	ACTG1	incomplete-splice_match	5prime_fragment
88295	11.1938	-0.825738	0.421541	-1.95886	0.0501296	0.575501	MPV17	full-splice_match	alternative_3end
72078	7.12349	1.26416	0.645446	1.95858	0.0501621	0.57558	TWF1P1	full-splice_match	mono-exon
102668	14.8693	-0.641976	0.327885	-1.95793	0.050238	0.576155	MTG2	full-splice_match	reference_match
114281	16.4243	-0.997965	0.509986	-1.95685	0.0503652	0.577319	SNX4	incomplete-splice_match	5prime_fragment
53971	13.7832	1.77138	0.90538	1.95651	0.0504054	0.577484	RTN1	incomplete-splice_match	3prime_fragment
69045	130.701	-1.06361	0.543722	-1.95617	0.0504451	0.577643	TRAPPC1	full-splice_match	reference_match
20605	8.09192	1.58733	0.81191	1.95506	0.0505765	0.578851	RAB13	full-splice_match	reference_match
126664	137.825	-0.894187	0.457491	-1.95455	0.0506365	0.579242	PPIP5K2	incomplete-splice_match	5prime_fragment
41362	9.71496	1.30017	0.665321	1.9542	0.0506772	0.579313	METTL7A	full-splice_match	alternative_3end
129843	17.8051	0.755186	0.386471	1.95406	0.0506944	0.579313	PPP2CA	incomplete-splice_match	5prime_fragment
18739	35.4507	-1.5152	0.775593	-1.95361	0.0507478	0.579627	CORT	full-splice_match	alternative_3end5end
65944	51.2403	1.61858	0.829264	1.95183	0.0509582	0.581734	RPL13	full-splice_match	alternative_3end
112214	10.252	2.07601	1.0638	1.95151	0.0509964	0.581873	CHMP2B	full-splice_match	alternative_3end
24705	6.64765	-1.67836	0.860743	-1.94989	0.0511889	0.583475	C1QL3	full-splice_match	alternative_3end5end
86179	5.88583	-2.74616	1.40834	-1.94993	0.051184	0.583475	ERCC1	full-splice_match	alternative_3end5end
164010	229.862	1.86776	0.958272	1.9491	0.051284	0.584262	LAMP2	full-splice_match	alternative_3end
201113	6.0871	2.4839	1.27503	1.94811	0.0514021	0.584977	PPP1R12A	incomplete-splice_match	3prime_fragment
67507	12.6816	1.50117	0.770755	1.94766	0.0514553	0.584977	PAFAH1B1	full-splice_match	alternative_3end5end
90432	22.7257	-1.66739	0.855826	-1.94829	0.0513808	0.584977	RTN4	full-splice_match	alternative_3end5end
136865	5.88704	-1.87451	0.962534	-1.94748	0.0514774	0.584977	LMBRD1	incomplete-splice_match	internal_fragment
156829	30.6218	-4.17294	2.14254	-1.94766	0.0514557	0.584977	SLC44A1	incomplete-splice_match	3prime_fragment
157531	35.8427	-0.948001	0.487092	-1.94625	0.0516248	0.586355	ENSG00000203279	full-splice_match	mono-exon
46140	12.8229	1.57867	0.81146	1.94548	0.0517178	0.58647	C12orf76	full-splice_match	alternative_3end
14474	16.0245	1.46268	0.751769	1.94566	0.0516959	0.58647	COA6	full-splice_match	alternative_5end
183588	88.692	5.66159	2.9104	1.94529	0.0517396	0.58647	HPCA	novel_in_catalog	combination_of_known_junctions
57150	9.90285	-3.0078	1.54579	-1.9458	0.0516788	0.58647	MAP1A	incomplete-splice_match	3prime_fragment
35917	75.2789	2.76709	1.42288	1.94471	0.0518094	0.586874	BSCL2	incomplete-splice_match	3prime_fragment
150596	28.5023	-1.11034	0.570996	-1.94456	0.0518277	0.586874	ENSG00000270866	full-splice_match	mono-exon
49375	11.6591	4.99887	2.57208	1.94351	0.0519544	0.587054	TDRD3	incomplete-splice_match	3prime_fragment
73887	31.8167	4.87559	2.50936	1.94296	0.0520206	0.587054	TMEM94	incomplete-splice_match	3prime_fragment
398347	13.6825	3.64805	1.87723	1.94331	0.0519783	0.587054	RBM48	incomplete-splice_match	3prime_fragment
297124	19.5692	3.1739	1.63288	1.94375	0.0519261	0.587054	GRIA3	incomplete-splice_match	3prime_fragment
469913	11.2174	2.8325	1.45795	1.94279	0.0520415	0.587054	STX7	incomplete-splice_match	3prime_fragment
9275	15.636	-0.956543	0.492069	-1.94392	0.0519052	0.587054	SGIP1	incomplete-splice_match	5prime_fragment
58055	5.77492	-1.34897	0.694337	-1.94282	0.0520377	0.587054	SH3GL3	full-splice_match	alternative_3end5end
24438	20.783	-1.76382	0.907924	-1.94269	0.0520533	0.587054	EPC1	incomplete-splice_match	5prime_fragment
102493	9.79221	3.25667	1.6771	1.94184	0.0521563	0.58792	BCAS1	full-splice_match	alternative_3end5end
43494	5.69468	3.02656	1.55944	1.9408	0.0522821	0.588199	SYT1	novel_not_in_catalog	Alt5
150519	10.0034	0.740636	0.381517	1.94129	0.0522226	0.588199	ENSG00000272155	full-splice_match	mono-exon
122015	5.36658	-1.58212	0.815356	-1.9404	0.052331	0.588199	UBE2D3	incomplete-splice_match	5prime_fragment
82748	22.1712	-2.51583	1.29637	-1.94067	0.0522977	0.588199	ZNF528	incomplete-splice_match	5prime_fragment
58438	7.81368	-3.31736	1.70963	-1.9404	0.0523314	0.588199	TLN2	incomplete-splice_match	3prime_fragment
23341	8.85961	-3.73969	1.92734	-1.94034	0.0523387	0.588199	GTPBP4	incomplete-splice_match	3prime_fragment
57786	45.9768	-0.696518	0.359043	-1.93993	0.0523884	0.588463	RCN2	incomplete-splice_match	5prime_fragment
354741	258.805	3.79929	1.95969	1.93873	0.0525348	0.589517	PTPRS	incomplete-splice_match	3prime_fragment
237141	14.833	3.23458	1.66839	1.93874	0.0525328	0.589517	PPM1B	incomplete-splice_match	3prime_fragment
411737	23.4423	2.78031	1.43461	1.93803	0.0526201	0.589882	TSPYL2	incomplete-splice_match	3prime_fragment
343205	20.8042	-4.62186	2.3848	-1.93805	0.0526176	0.589882	TBC1D10B	incomplete-splice_match	3prime_fragment
47396	5.95219	-1.57829	0.814523	-1.93768	0.0526617	0.590053	EEF1A1P3	full-splice_match	mono-exon
[truncated: 51,537 more rows]
