# Supplementary material for: RNA isoform diversity, splicing variants, and switching in single cells of the Alzheimer’s disease brain
Source: Research Square preprint supplement (doi:10.21203/rs.3.rs-7436496/v1), 2025-09-29
Supplement: Supplementary file 2 [file 387461ab2c9b613b08804857.xlsx]

## Sheet: README
Supplementary Table 5
AD-related genes and the number of reference isoforms, known/reference isoforms detected in our dataset, novel isoforms detected in our dataset

## Sheet: List of AD Loci 
Gene	#known isoforms in reference annotation	#known isoforms from Kinnex	#novel isoforms from Kinnex
ABCA1	5	0	0
ABCA7	18	0	0
ABI3	2	0	0
ACE	21	0	0
ADAM17	28	1	0
ADAMTS1	10	0	0
ANK3	5	3	1
ANKH	1	4	0
APH1B	10	1	0
APP	20	3	0
BCKDK	10	1	0
BIN1	14	5	1
BLNK	25	0	0
CASS4	5	0	0
CD2AP	5	0	0
CLNK	5	0	0
CLU	17	4	2
COX7C	7	3	1
CR1	12	0	0
CTSB	60	3	0
CTSH	69	1	0
DOC2A	18	1	0
EED	6	1	0
EPDR1	3	2	0
EPHA1	7	0	0
FERMT2	15	0	0
FOXF1	1	0	0
GRN	21	1	0
HLA-DQA1	7	0	0
HS3ST5	2	0	0
ICA1	19	0	0
IDUA	13	0	0
IL34	5	1	1
INPP5D	14	0	0
JAZF1	9	1	0
KLF16	4	0	0
LILRB2	8	0	0
MAF	3	2	0
MINDY2	5	2	0
MME	17	0	0
MS4A4A	18	1	0
MYO15A	23	0	0
NCK2	1	0	0
PLCG2	42	0	0
PLEKHA1	5	0	6
PRDM7	5	0	0
PRKD3	10	0	0
PTK2B	9	0	0
RASGEF1C	4	0	0
RBCK1	20	3	0
RHOH	3	0	0
SCIMP	4	0	0
SEC61G	7	3	0
SHARPIN	10	2	1
SIGLEC11	3	0	0
SLC24A4	9	0	0
SLC2A4RG	8	0	1
SNX1	14	1	0
SORL1	13	1	0
SORT1	10	0	1
SPDYE3	2	0	0
SPI1	6	0	0
SPPL2A	18	0	0
TMEM106B	16	2	0
TNIP1	20	0	0
TPCN1	1	0	0
TREM2	4	1	0
TREML2	1	0	0
TSPAN14	11	0	0
TSPOAP1	11	1	0
UMAD1	10	0	4
UNC5CL	4	0	0
USP6NL	2	0	0
WDR12	1	0	0
WDR81	14	0	0
WNT3	8	2	0

## Sheet: AD risk protective causal genes
Gene	#known isoforms in reference annotation	#known isoforms from Kinnex	#novel isoforms from Kinnex
ABCA7	18	0	0
ABI3	2	0	0
APOE	5	1	1
APP	20	3	0
APBB3	21	0	0
BIN1	14	5	1
EPHA1	7	0	0
CASP7	13	0	0
CR1	12	0	0
MS4A6A	12	1	0
PILRA	7	1	1
PLCG2	42	0	0
PSEN1	88	2	0
PSEN2	37	0	0
ADAM10	7	0	0
RIN3	12	0	0
SORL1	13	1	0
SPI1	6	0	0
TREM2	4	1	0
PICALM	24	1	0
