# Supplementary material for: RNA isoform diversity, splicing variants, and switching in single cells of the Alzheimer’s disease brain
Source: Research Square preprint supplement (doi:10.21203/rs.3.rs-7436496/v1), 2025-09-29
Supplement: Supplementary file 3 [file 48141fad9b33eea81db6a090.xlsx]

## Sheet: README
Supplementary Table 2
DEGs from short-read single-cell RNA-sequencing for each cell type
Each tab lists the differentially expressed genes comparing AD vs ND for each cell type
	gene	gene name
	p_val	p value
	avg_log2FC	average log2FC change of AD/ND
	pct.1	percent of cells in AD group that express the gene
	pct.2	percent of cells in ND group that express the gene
	p_val_adj	adjusted p-value

## Sheet: Per_AD_logNorm_diffEx
gene	p_val	avg_log2FC	pct.1	pct.2	p_val_adj
SLC7A14-AS1	3.76888e-06	-2.32586	0.173	0.619	0.11656
SLC6A20	4.40386e-06	-2.3209	0.058	0.452	0.136198
PTPN9	1.0077e-05	-1.57945	0.115	0.524	0.31165
ZNF721	2.38716e-05	-1.96717	0.038	0.381	0.738278
MALAT1	3.45865e-05	-0.819864	1	1	1
ENOSF1	3.52475e-05	-1.62344	0.038	0.381	1
SLC7A11	4.92611e-05	-1.34963	0.212	0.619	1
CEMIP	5.81337e-05	-1.90279	0.327	0.714	1
CAPZB	6.15119e-05	-1.63277	0.154	0.548	1
MAP2K1	0.000100408	-1.19175	0	0.262	1
KCNK2	0.000117577	-1.69656	0.096	0.452	1
TAPT1-AS1	0.000171559	-1.41058	0.038	0.333	1
KAZN	0.000186601	-1.71561	0.423	0.738	1
KDM1A	0.000226429	-1.06939	0	0.238	1
ARL17B	0.000226429	-1.23382	0	0.238	1
KIAA1755	0.000236006	-1.53807	0.058	0.357	1
ACACA	0.00024646	-1.74842	0.058	0.357	1
LINC01482	0.000268684	-1.75476	0.058	0.357	1
LZTS1	0.000313451	2.3956	0.269	0	1
WWOX	0.000364035	-1.1769	0.5	0.786	1
WDR86	0.000369608	-1.58739	0.038	0.31	1
SGO1-AS1	0.000504443	-1.49027	0	0.214	1
FBXL20	0.000552826	-1.1614	0.096	0.405	1
ACOT11	0.000626821	-1.76516	0.038	0.286	1
CFDP1	0.000685646	-1.069	0.077	0.381	1
ILRUN	0.000717871	-1.21759	0.058	0.333	1
MACF1	0.000888877	-0.617135	0.385	0.786	1
TVP23C	0.000895343	-1.34403	0.038	0.286	1
EHBP1	0.00090936	-1.36515	0.269	0.548	1
AC009120.2	0.000935553	-1.55872	0.038	0.286	1
SLC13A3	0.000953908	-2.72392	0.019	0.238	1
TMEM14B	0.000963031	-1.35161	0.077	0.357	1
TMEM108	0.00097743	-1.51158	0.038	0.286	1
RALA	0.00100132	-1.21422	0.019	0.238	1
ADAM12	0.00102104	-1.36808	0.038	0.286	1
SMG6	0.00106575	-1.06623	0.173	0.5	1
IFT172	0.00111153	-1.39691	0	0.19	1
SLC7A14	0.00111153	-1.40852	0	0.19	1
TMEM232	0.00111153	-1.70099	0	0.19	1
SNHG5	0.00111153	-0.913857	0	0.19	1
FGFR1OP	0.00111153	-0.769012	0	0.19	1
SNED1	0.00113779	-2.08838	0.173	0.452	1
PAFAH1B1	0.00121303	-1.01984	0.173	0.5	1
GON4L	0.00121362	-1.29437	0.019	0.238	1
TANC2	0.00124393	-1.04713	0.192	0.524	1
HIVEP3	0.00126736	-0.923914	0.038	0.286	1
TFPI	0.00127811	1.64546	0.385	0.095	1
GNG11	0.00138068	2.49406	0.327	0.071	1
PNPLA7	0.00139933	-1.03426	0.019	0.238	1
MLPH	0.00139933	-1.39371	0.019	0.238	1
GABPB2	0.00143233	-1.74315	0.096	0.357	1
AGBL4	0.00147946	-0.622696	0.058	0.333	1
ANKRD28	0.0015191	-1.14907	0.058	0.31	1
ASH1L	0.00171273	-1.14378	0.25	0.571	1
SLC49A4	0.00178648	-1.15061	0.038	0.262	1
ITGA8	0.00182277	-1.25613	0.077	0.333	1
MDFIC	0.00200357	-0.767707	0.058	0.31	1
MYO10	0.00201369	-1.03152	0.192	0.5	1
FAM20A	0.00203922	-1.31295	0.077	0.333	1
RFTN1	0.00211974	-1.33039	0.038	0.262	1
DNAJC1	0.00212903	-0.976244	0.096	0.381	1
MROH7	0.00214489	-1.43112	0.019	0.214	1
PHF20	0.00219636	-1.15606	0.077	0.333	1
RBM4	0.00224917	-1.23293	0.019	0.214	1
ITGB3BP	0.00230694	-0.864229	0.038	0.262	1
ACAP2	0.00231236	-1.02625	0.135	0.429	1
PRKCA	0.00232938	-1.35286	0.365	0.667	1
GPC5	0.00233312	1.86719	0.423	0.167	1
MAP3K14	0.00235809	-0.932694	0.019	0.214	1
PDE8B	0.00240624	1.80034	0.423	0.167	1
PSMD4	0.00242605	-0.515402	0	0.167	1
TSGA10	0.00242605	-0.767482	0	0.167	1
NEK11	0.00242605	-1.02529	0	0.167	1
KYAT1	0.00242605	-1.06997	0	0.167	1
BDNF-AS	0.00242605	-0.80626	0	0.167	1
BBS4	0.00242605	-0.757616	0	0.167	1
ETFA	0.00242605	-0.622322	0	0.167	1
CPM	0.00243452	2.01002	0.288	0.048	1
ADGRB3	0.00245109	1.61246	0.365	0.095	1
MAP4K5	0.00249772	-0.81197	0.154	0.476	1
PROS1	0.00262369	-1.37783	0.077	0.31	1
MDM4	0.00263898	-0.721316	0.077	0.333	1
MIR99AHG	0.00264932	-0.780618	0.654	0.833	1
DDR2	0.00270804	-0.551618	0.115	0.405	1
KIF9-AS1	0.00271446	-1.12409	0.019	0.214	1
TMEM132C	0.00279589	-1.543	0.269	0.548	1
LINC01473	0.0028289	-1.1564	0.154	0.429	1
FLI1	0.00291051	1.73145	0.192	0	1
CSMD2	0.00296304	-0.820715	0.038	0.262	1
TSEN2	0.00297868	-1.22984	0.019	0.214	1
GXYLT2	0.00297868	-0.815812	0.019	0.214	1
SPATS2	0.00297868	-1.01056	0.019	0.214	1
PLAAT3	0.00305021	-0.87282	0.077	0.333	1
AC098617.1	0.00311941	-1.16125	0.019	0.214	1
RBCK1	0.00311941	-0.771545	0.019	0.214	1
WSB1	0.00314619	-0.925766	0.173	0.452	1
NR2C1	0.0031522	-1.1504	0.058	0.286	1
LRCH3	0.00320712	-0.977359	0.154	0.429	1
VPS35L	0.00324401	-0.778876	0.096	0.357	1
CBFA2T2	0.00328978	-0.901444	0.135	0.429	1
HSPB1	0.0033513	1.79914	0.231	0.024	1
DLG2	0.00337247	-0.775587	0.481	0.786	1
TLE1	0.00339646	-1.34376	0.077	0.31	1
MRC2	0.0035215	-1.12473	0.135	0.405	1
BICRAL	0.00354877	-1.27674	0.115	0.381	1
AUH	0.00359425	-1.04262	0.096	0.357	1
KLHL22	0.00366967	-1.19647	0.038	0.238	1
ADGRL3	0.00378704	1.46926	0.288	0.048	1
PLCB4	0.00386043	-0.667167	0.423	0.762	1
ORC4	0.00398924	-1.07835	0.038	0.238	1
DDX60	0.00398924	-0.890865	0.038	0.238	1
L3MBTL1	0.00398924	-0.755179	0.038	0.238	1
ZNF655	0.00406965	-0.893665	0.077	0.31	1
ALDH1A2	0.00406965	-1.03894	0.077	0.31	1
GRID1	0.00411789	-0.974174	0.058	0.286	1
YY1AP1	0.00415832	-1.2291	0.038	0.238	1
ANXA11	0.00415832	-0.718793	0.038	0.238	1
ZNF236	0.00415832	-1.15283	0.038	0.238	1
TBX18	0.00421932	-0.701985	0.154	0.452	1
LAMA4	0.00425978	-1.0843	0.308	0.595	1
FMOD	0.00433387	-1.11766	0.038	0.238	1
GRM8	0.00449067	1.32823	0.385	0.119	1
KANTR	0.00451612	-0.985226	0.038	0.238	1
TENT2	0.0046009	-1.03182	0.115	0.381	1
KDM6A	0.00467245	-0.873987	0.135	0.405	1
ZYG11B	0.00470529	-1.09607	0.038	0.238	1
PLEKHA5	0.00478586	-0.635775	0.346	0.69	1
CCT3	0.00498451	1.30789	0.173	0	1
RNF220	0.00499547	-1.04045	0.462	0.69	1
ERCC6L2	0.00521593	-1.0944	0.077	0.31	1
ASXL2	0.00521996	-0.863922	0.019	0.19	1
D2HGDH	0.00521996	-0.918241	0.019	0.19	1
ME3	0.00521996	-0.800628	0.019	0.19	1
GTF3C2	0.00525531	-0.612923	0	0.143	1
VRK2	0.00525531	-0.956031	0	0.143	1
AC034195.1	0.00525531	-1.04366	0	0.143	1
METTL6	0.00525531	-0.738126	0	0.143	1
MANBA	0.00525531	-0.548892	0	0.143	1
AC124854.1	0.00525531	-0.887081	0	0.143	1
DDX39B	0.00525531	-0.706897	0	0.143	1
METTL24	0.00525531	-0.736558	0	0.143	1
SNHG6	0.00525531	-0.968097	0	0.143	1
RGS22	0.00525531	-0.787175	0	0.143	1
ABRAXAS2	0.00525531	-0.559566	0	0.143	1
ST3GAL4	0.00525531	-0.896871	0	0.143	1
XPOT	0.00525531	-1.20707	0	0.143	1
GOLGA8A	0.00525531	-0.876482	0	0.143	1
SOCS7	0.00525531	-0.865028	0	0.143	1
SCPEP1	0.00525531	-0.597731	0	0.143	1
C19orf12	0.00525531	-0.56785	0	0.143	1
PVR	0.00525531	-1.27666	0	0.143	1
YPEL1	0.00525531	-1.01115	0	0.143	1
TMEM184B	0.00525531	-1.15493	0	0.143	1
GRIA3	0.00525531	-0.554832	0	0.143	1
B4GALT5	0.00540159	-0.650834	0.077	0.31	1
DECR1	0.00546542	-0.8499	0.019	0.19	1
MORC3	0.00546542	-0.892439	0.019	0.19	1
CYTH1	0.00553578	-0.689688	0.038	0.238	1
KIAA0319L	0.00559321	-0.552706	0.077	0.31	1
ATXN2	0.00560674	-0.939847	0.231	0.5	1
KLHDC1	0.0056074	-1.04861	0.096	0.333	1
MBNL2	0.0056188	-0.900704	0.135	0.405	1
CLNS1A	0.00572126	-0.91227	0.019	0.19	1
FBXO31	0.00576308	-0.61434	0.038	0.238	1
SHISA6	0.00580285	1.6519	0.327	0.095	1
MYSM1	0.00598784	-0.880469	0.019	0.19	1
TGFB2	0.00598784	-0.906415	0.019	0.19	1
RBM14	0.00598784	-0.73848	0.019	0.19	1
LAMB1	0.00599072	-1.16725	0.115	0.357	1
MAP2K5	0.00599207	-0.955542	0.096	0.333	1
NAALADL2	0.00601342	-1.14324	0.135	0.381	1
ZC3H14	0.00617682	-1.1119	0.058	0.262	1
PARD3	0.0062362	-0.684515	0.654	0.881	1
NOS1AP	0.00626557	-1.04583	0.019	0.19	1
RAB28	0.00626557	-0.662458	0.019	0.19	1
PRR5L	0.00626557	-0.712956	0.019	0.19	1
TMEM263	0.00626557	-0.781153	0.019	0.19	1
ADGRD1	0.00639349	1.49828	0.346	0.119	1
GLI3	0.00649634	-0.521171	0.038	0.238	1
PLD1	0.0065509	-1.29746	0.192	0.452	1
AP000943.2	0.00655483	-0.304691	0.019	0.19	1
SYNDIG1	0.00655483	-0.710726	0.019	0.19	1
SEC63	0.00661375	-0.793839	0.096	0.333	1
KIF13B	0.00665393	-1.03706	0.058	0.262	1
MICOS10	0.00679825	-0.990154	0.115	0.357	1
MT-CO3	0.00701766	-0.966438	0.269	0.548	1
ASPH	0.00716391	-0.895598	0.058	0.262	1
HEATR5A	0.00716391	-0.593842	0.058	0.262	1
RIN2	0.00732555	-0.819294	0.192	0.452	1
COL15A1	0.00735754	-1.38224	0.096	0.31	1
WDR27	0.00743183	-0.944218	0.058	0.262	1
PDIA3	0.00743183	-0.784981	0.058	0.262	1
AKR1C2	0.00745711	1.60397	0.212	0.024	1
GK5	0.00746884	-1.01764	0.154	0.405	1
GNAQ	0.00747851	-0.779212	0.212	0.5	1
ADAM10	0.00753163	-0.95687	0.192	0.452	1
EPHA3	0.00758558	-0.654473	0.135	0.405	1
TPM1	0.00767465	-1.22664	0.308	0.548	1
UBE2H	0.00778337	-1.34935	0.173	0.429	1
APPL2	0.00795147	-1.17573	0.077	0.286	1
RC3H1	0.00813921	-0.779029	0.135	0.381	1
IRF2	0.00822945	-0.869784	0.077	0.286	1
IQCB1	0.00829033	-0.578412	0.058	0.262	1
RAB6A	0.00839115	-1.27045	0.096	0.31	1
CPNE3	0.00848589	1.32478	0.154	0	1
CDIP1	0.00848589	1.18657	0.154	0	1
ACADL	0.00855339	-1.26154	0.058	0.238	1
RALGPS2	0.00881163	-0.8205	0.077	0.286	1
SNX9	0.00881163	-1.0407	0.077	0.286	1
MAN1C1	0.00888375	-1.06928	0.154	0.405	1
LPAR1	0.00898303	-0.772818	0.115	0.357	1
EXOC4	0.00900128	-0.751358	0.269	0.571	1
LIPA	0.00908407	-1.32236	0.115	0.333	1
AC119673.2	0.00916289	-0.74849	0.135	0.381	1
UBE2K	0.00920903	-0.75862	0.173	0.429	1
UBR2	0.00930878	-0.477588	0.135	0.405	1
PRKRIP1	0.00958157	-0.630103	0.135	0.405	1
HECTD2	0.00983103	-0.823981	0.038	0.214	1
YWHAB	0.00993524	1.36206	0.269	0.071	1
F3	0.00996359	-0.637548	0.231	0.524	1
CEP112	0.0100628	-1.05292	0.25	0.476	1
XIAP	0.0100875	-0.944145	0.077	0.286	1
AC092957.1	0.0101737	-1.04902	0.462	0.667	1
POLR3A	0.010226	-0.937768	0.038	0.214	1
TNKS2	0.010226	-0.854353	0.038	0.214	1
RRAS2	0.010226	-0.699659	0.038	0.214	1
FCHSD2	0.0102408	-0.692279	0.154	0.405	1
ATP10D	0.010277	-1.12576	0.115	0.333	1
SLC22A23	0.010403	-0.905642	0.135	0.357	1
PTPRU	0.0104255	-0.982735	0.019	0.167	1
AC061708.1	0.0104255	-1.65535	0.019	0.167	1
PIR	0.0104255	-0.951511	0.019	0.167	1
RBM5	0.0104311	-0.840416	0.077	0.286	1
DANT2	0.0104422	-0.955371	0.192	0.452	1
RPS6KB1	0.010516	-1.12539	0.096	0.31	1
ZER1	0.010635	-0.880444	0.038	0.214	1
GPM6A	0.0108132	-0.270874	0.173	0.452	1
PPM1H	0.0108721	-0.882678	0.135	0.357	1
ARL6IP6	0.0109067	-0.617682	0.019	0.167	1
TTLL3	0.0109067	-1.22794	0.019	0.167	1
POLR2B	0.0109067	-0.987733	0.019	0.167	1
PRMT7	0.0109067	-1.10266	0.019	0.167	1
RPRD1A	0.0109067	-1.10832	0.019	0.167	1
SLC23A2	0.0109067	-0.517055	0.019	0.167	1
PIP5K1A	0.0109242	-1.3404	0.115	0.333	1
NR2F1-AS1	0.0109978	-0.674621	0.346	0.595	1
SPAG16	0.0110585	-0.537621	0.038	0.214	1
RPTOR	0.0110585	-0.68083	0.038	0.214	1
KIAA0825	0.0110629	-1.32788	0.058	0.238	1
TCF12	0.0111334	-0.519334	0.269	0.595	1
WNT2B	0.0113294	-0.385918	0	0.119	1
RSBN1	0.0113294	-0.815578	0	0.119	1
NOTCH2NLC	0.0113294	-0.790388	0	0.119	1
THEM4	0.0113294	-0.813997	0	0.119	1
SNRPE	0.0113294	-0.794442	0	0.119	1
TARBP1	0.0113294	-0.395326	0	0.119	1
TRMT61B	0.0113294	-0.767585	0	0.119	1
CACNB4	0.0113294	-0.971777	0	0.119	1
TRNT1	0.0113294	-0.828079	0	0.119	1
P4HTM	0.0113294	-1.18615	0	0.119	1
ARHGEF3	0.0113294	-0.935551	0	0.119	1
TMEM39A	0.0113294	-0.580384	0	0.119	1
SEL1L3	0.0113294	-0.769877	0	0.119	1
COPS4	0.0113294	-0.598843	0	0.119	1
SNCAIP	0.0113294	-0.574128	0	0.119	1
RANBP17	0.0113294	-0.436804	0	0.119	1
PSMB9	0.0113294	-0.779902	0	0.119	1
MRPL14	0.0113294	-0.445111	0	0.119	1
LAMTOR4	0.0113294	-0.674465	0	0.119	1
DEPTOR	0.0113294	-0.765104	0	0.119	1
GBA2	0.0113294	-0.560017	0	0.119	1
CFAP70	0.0113294	-0.74098	0	0.119	1
PRMT3	0.0113294	-0.629538	0	0.119	1
AL122014.1	0.0113294	-0.697548	0	0.119	1
CRY2	0.0113294	-0.919906	0	0.119	1
TMEM126B	0.0113294	-0.268389	0	0.119	1
APAF1	0.0113294	-0.617693	0	0.119	1
POLR1D	0.0113294	-0.753565	0	0.119	1
CCDC122	0.0113294	-0.559743	0	0.119	1
TGDS	0.0113294	-0.605428	0	0.119	1
DACT1	0.0113294	-0.697694	0	0.119	1
MTHFS	0.0113294	-0.524804	0	0.119	1
HMOX2	0.0113294	-0.610976	0	0.119	1
ZNF500	0.0113294	-0.864266	0	0.119	1
SAT2	0.0113294	-0.841332	0	0.119	1
MED24	0.0113294	-0.868305	0	0.119	1
PDE4A	0.0113294	-0.685003	0	0.119	1
TRIR	0.0113294	-1.00669	0	0.119	1
SDCBP2-AS1	0.0113294	-1.03457	0	0.119	1
ZNF335	0.0113294	-1.03359	0	0.119	1
JAM2	0.0113294	-1.33309	0	0.119	1
APOL1	0.0113294	-0.478884	0	0.119	1
CTPS2	0.0113294	-0.935867	0	0.119	1
BEX1	0.0113294	-1.22051	0	0.119	1
ENPP6	0.0114076	-0.866526	0.019	0.167	1
SMAD3	0.0114563	-0.591811	0.154	0.405	1
JAKMIP2	0.0114704	-1.05068	0.058	0.238	1
UPF2	0.0114704	-1.33869	0.058	0.238	1
TCF20	0.0114704	-1.07734	0.058	0.238	1
PWWP2A	0.0115253	-0.575483	0.077	0.286	1
MICU3	0.0115253	-0.608498	0.077	0.286	1
SUSD6	0.0115253	-0.660245	0.077	0.286	1
CLK1	0.0115646	-0.616582	0.096	0.31	1
EVA1C	0.0116974	-0.941987	0.135	0.357	1
ODF2L	0.0117759	-0.541235	0.192	0.476	1
LRRC7	0.0119288	-0.858646	0.019	0.167	1
ADHFE1	0.0119288	-0.798776	0.019	0.167	1
RTRAF	0.0119288	-0.754731	0.019	0.167	1
IFT43	0.0119288	-0.500512	0.019	0.167	1
NDUFAF2	0.0119507	-0.66766	0.038	0.214	1
BCL6	0.0120874	-0.563075	0.212	0.452	1
WDR60	0.0123254	-1.19345	0.058	0.238	1
PRKG2	0.0124709	-0.702299	0.019	0.167	1
ERMARD	0.0124709	-0.664637	0.019	0.167	1
ZHX1	0.0124709	-0.669577	0.019	0.167	1
TRIM66	0.0124709	-0.709018	0.019	0.167	1
PDHX	0.0124709	-0.871947	0.019	0.167	1
NHLRC3	0.0124709	-0.940886	0.019	0.167	1
TMEM62	0.0124709	-0.703289	0.019	0.167	1
MYOM1	0.0124709	-1.10173	0.019	0.167	1
ZNF146	0.0124709	-0.794519	0.019	0.167	1
TASP1	0.0124709	-0.690527	0.019	0.167	1
ATP6V1A	0.012705	-0.614954	0.096	0.31	1
CASK	0.0127202	-0.410201	0.077	0.286	1
WBP1L	0.012863	-0.631011	0.115	0.357	1
OSBPL1A	0.0128735	-0.793315	0.077	0.262	1
FABP5	0.0129061	-0.598365	0.038	0.214	1
CNIH3	0.0130348	-0.775651	0.019	0.167	1
DNAH14	0.0130348	-0.5337	0.019	0.167	1
TOM1L1	0.0130348	-0.914388	0.019	0.167	1
CACNA1A	0.0130348	-0.527605	0.019	0.167	1
CNOT9	0.0132364	-0.797051	0.058	0.238	1
C7	0.0135244	-1.24532	0.231	0.452	1
LINC02018	0.0136211	-0.793252	0.019	0.167	1
SHB	0.0136211	-0.561372	0.019	0.167	1
RABL6	0.0136211	-0.433131	0.019	0.167	1
EID1	0.0136211	-0.422374	0.019	0.167	1
ARL17A	0.0136211	-0.353558	0.019	0.167	1
LARP4	0.0137138	-0.931939	0.058	0.238	1
AATF	0.0137138	-0.977634	0.058	0.238	1
HDAC8	0.0138899	-0.876338	0.115	0.333	1
AF117829.1	0.0142064	-0.736287	0.058	0.238	1
RPS13	0.0142064	-0.763855	0.058	0.238	1
ELP2	0.0142277	-0.788596	0.077	0.262	1
CSMD1	0.0142981	1.4477	0.231	0.048	1
GUCY1A2	0.014379	1.22021	0.135	0	1
LDLRAD4	0.0144189	-1.22591	0.154	0.381	1
SASH1	0.0144247	-0.76748	0.481	0.714	1
CADPS2	0.014593	1.66505	0.385	0.167	1
MLLT3	0.0146593	-1.00617	0.173	0.405	1
IFRD1	0.0147145	-0.726452	0.058	0.238	1
ZNF83	0.0147216	-1.13295	0.135	0.357	1
YAP1	0.0152306	-0.888209	0.212	0.452	1
KCMF1	0.0152386	-0.738669	0.058	0.238	1
WTAP	0.0152386	-0.451483	0.058	0.238	1
GAB2	0.0152881	-0.72214	0.096	0.31	1
C5orf56	0.0153998	-0.829109	0.038	0.19	1
MT-ND1	0.0154475	1.45371	0.385	0.19	1
SNHG14	0.015677	-0.696463	0.423	0.667	1
LPGAT1	0.0157061	-0.702358	0.077	0.262	1
STIM2	0.0157061	-0.661699	0.077	0.262	1
RHBDD1	0.0157791	-0.982154	0.058	0.238	1
ZNF131	0.0159438	-0.301482	0.077	0.286	1
TCERG1	0.0160126	-0.787472	0.038	0.19	1
BMP6	0.0160361	-0.805868	0.096	0.286	1
PLEKHM3	0.0163363	-0.6461	0.058	0.238	1
UPF3A	0.0163363	-0.591763	0.058	0.238	1
AGO3	0.0164776	-0.823833	0.135	0.357	1
CCDC91	0.0164776	-0.829308	0.135	0.357	1
USP9X	0.0165598	-0.573471	0.115	0.333	1
RPL28	0.0166351	1.11172	0.423	0.19	1
JPX	0.0166876	-0.679017	0.192	0.452	1
PTMS	0.0167214	1.42929	0.25	0.071	1
URGCP	0.0169108	-0.866213	0.058	0.238	1
CCDC18-AS1	0.0172711	-0.722286	0.212	0.452	1
TRIM38	0.0173029	-0.877087	0.038	0.19	1
ERO1A	0.0173029	-1.28779	0.038	0.19	1
FUS	0.0173179	-0.78661	0.077	0.262	1
RBPMS	0.0174583	-0.827967	0.365	0.643	1
PRELP	0.0178763	1.38851	0.481	0.286	1
TYW1	0.0178855	-0.827778	0.077	0.262	1
TFCP2	0.0179208	-0.711032	0.154	0.381	1
GALNT15	0.0181131	1.47907	0.212	0.048	1
FILIP1L	0.0183296	1.54327	0.173	0.024	1
CMSS1	0.0184715	-0.929438	0.077	0.262	1
BCL2L13	0.0184715	-0.565928	0.077	0.262	1
PRICKLE1	0.0185793	-0.750565	0.173	0.405	1
SELENOW	0.0185793	1.53342	0.365	0.167	1
MYL9	0.018598	1.614	0.269	0.095	1
TMF1	0.0186835	-0.99555	0.038	0.19	1
NUP98	0.0186835	-0.677451	0.038	0.19	1
LARP1	0.0187014	-0.862535	0.096	0.286	1
DIP2C	0.0187014	-0.791851	0.096	0.286	1
ELOA-AS1	0.0187418	-0.290599	0.058	0.238	1
NEMF	0.0189204	-1.22366	0.115	0.31	1
PATJ	0.0192786	-0.830451	0.096	0.286	1
AC073050.1	0.0192786	-1.02092	0.096	0.286	1
GALNT11	0.0192786	-0.818885	0.096	0.286	1
STARD9	0.0192786	-0.874344	0.096	0.286	1
ST13	0.0193896	1.36686	0.212	0.048	1
ANAPC4	0.0194092	-0.44224	0.038	0.19	1
PRPSAP2	0.0194092	-0.906563	0.038	0.19	1
COL11A1	0.0196098	-1.00064	0.154	0.357	1
SPATA5	0.0196917	-0.672457	0.077	0.262	1
VPS54	0.0197486	-0.723219	0.135	0.333	1
BMPR2	0.0199297	-0.768852	0.192	0.429	1
MAP4K3-DT	0.0200499	-0.959705	0.115	0.31	1
CLK4	0.0201595	-0.674266	0.038	0.19	1
SUGCT	0.0201595	-0.814844	0.038	0.19	1
ZNF862	0.0201595	-0.745306	0.038	0.19	1
SMURF2	0.0203278	-0.573628	0.077	0.262	1
GMDS	0.0203941	-0.649777	0.231	0.476	1
SCARB1	0.020435	-0.817785	0.192	0.429	1
TIMP2	0.0206355	1.15195	0.288	0.095	1
FAM228B	0.0209349	-0.692593	0.038	0.19	1
DHX57	0.0209349	-0.727152	0.038	0.19	1
MFSD14B	0.0209349	-0.761028	0.038	0.19	1
LRCH2	0.0209349	-0.658034	0.038	0.19	1
BNC2	0.0209514	-0.797564	0.192	0.429	1
PIK3CB	0.0211049	-0.906417	0.096	0.286	1
RBL2	0.0211049	-0.807169	0.096	0.286	1
LRP1	0.0212096	-0.568844	0.308	0.595	1
IRF2BP2	0.0213323	1.3591	0.173	0.024	1
INF2	0.0214517	1.20085	0.212	0.048	1
SHROOM3	0.0216025	-1.08521	0.019	0.143	1
TET1	0.0216025	-1.1798	0.019	0.143	1
GAPDH	0.0216472	0.998172	0.442	0.214	1
UBE2B	0.021654	-0.486545	0.077	0.262	1
POGZ	0.0216768	-0.767775	0.173	0.405	1
AC092155.1	0.0217362	-0.389812	0.038	0.19	1
GATAD1	0.0217362	-0.4598	0.038	0.19	1
PCSK6	0.0217362	-0.616313	0.038	0.19	1
RAB11FIP3	0.0217362	-0.920283	0.038	0.19	1
TMBIM6	0.0218062	1.40115	0.346	0.167	1
JAK1	0.0218464	-0.54676	0.404	0.667	1
ROBO1	0.0220185	-0.800081	0.192	0.429	1
SLC25A27	0.0223449	-0.503448	0.077	0.262	1
FGFR1	0.0223449	-0.571995	0.077	0.262	1
CAPS2	0.0223449	-0.668334	0.077	0.262	1
HNRNPR	0.0224046	-0.897802	0.096	0.286	1
PRKG1	0.0224726	0.953674	0.5	0.286	1
XXYLT1	0.0224762	-0.877837	0.058	0.214	1
AC046195.1	0.0225641	-0.575102	0.038	0.19	1
SLC30A6	0.0225735	-0.714763	0.019	0.143	1
AC011246.1	0.0225735	-2.28799	0.019	0.143	1
ZNF346	0.0225735	-0.817746	0.019	0.143	1
ITGA3	0.0225735	-1.22456	0.019	0.143	1
ZNF544	0.0225735	-1.01509	0.019	0.143	1
IGFBP7	0.0230158	0.612466	0.577	0.333	1
ABL2	0.0231344	-1.03291	0.115	0.31	1
WDR33	0.0231344	-0.926106	0.115	0.31	1
SCD5	0.0232618	-1.01736	0.058	0.214	1
CHD8	0.0232618	-0.956467	0.058	0.214	1
NID2	0.0232618	-1.01907	0.058	0.214	1
LINC02614	0.0234192	-0.619258	0.038	0.19	1
CERT1	0.0234822	-0.911229	0.077	0.238	1
USP39	0.0235821	-1.11144	0.019	0.143	1
CCNJL	0.0235821	-0.758021	0.019	0.143	1
IQCH-AS1	0.0235821	-1.08679	0.019	0.143	1
ARID1A	0.0236255	-0.879185	0.154	0.357	1
ACER3	0.0240712	-0.687172	0.058	0.214	1
GIT2	0.0240712	-0.643676	0.058	0.214	1
PBX3	0.0241357	-0.98841	0.115	0.31	1
MYL12A	0.0242875	0.864028	0.115	0	1
AL499616.1	0.0242903	1.22562	0.115	0	1
BRINP1	0.0242903	1.23843	0.115	0	1
TUBB4B	0.0242903	1.01595	0.115	0	1
UNC119B	0.0242903	1.01317	0.115	0	1
DACH1	0.0242903	1.38464	0.115	0	1
AC009041.2	0.0242903	1.20204	0.115	0	1
SLC9A3R2	0.0242903	0.925199	0.115	0	1
SYNGR2	0.0242903	0.716282	0.115	0	1
DHX32	0.0243024	-0.484424	0.038	0.19	1
TMEM117	0.0243024	-0.363779	0.038	0.19	1
IGDCC4	0.0243024	-0.25908	0.038	0.19	1
EPS8	0.0244145	0.581635	0.673	0.548	1
ECPAS	0.0244844	-0.566886	0.096	0.286	1
KCNIP1	0.0245338	-0.93161	0.077	0.262	1
PRH1	0.0245338	-0.403762	0.077	0.262	1
C1S	0.0245922	-0.588616	0.173	0.405	1
KIF3A	0.0246297	-0.729729	0.019	0.143	1
WHRN	0.0246297	-0.45483	0.019	0.143	1
TBRG1	0.0246297	-1.02404	0.019	0.143	1
PRDM10	0.0246297	-0.752052	0.019	0.143	1
L2HGDH	0.0246297	-0.944386	0.019	0.143	1
ARHGAP23	0.0246297	-0.868271	0.019	0.143	1
OGA	0.0247813	-0.911535	0.212	0.429	1
THADA	0.0248046	-0.443609	0.135	0.357	1
NRF1	0.0248046	-0.506771	0.135	0.357	1
BABAM2	0.0248952	-0.544443	0.192	0.429	1
EEPD1	0.0249049	-0.769399	0.058	0.214	1
YTHDC2	0.0251765	-0.845099	0.115	0.31	1
ITFG1	0.0252139	-0.251636	0.096	0.286	1
WAPL	0.0252142	-0.284111	0.038	0.19	1
SUFU	0.0252142	-0.324609	0.038	0.19	1
MPP5	0.0252142	-0.299856	0.038	0.19	1
SLC24A3	0.0252142	-0.352201	0.038	0.19	1
MSI2	0.0253046	-0.636375	0.25	0.5	1
ERBB4	0.0253138	1.24937	0.212	0.048	1
GJC1	0.0256371	1.31399	0.269	0.095	1
AL138828.1	0.0256399	1.49457	0.288	0.119	1
RHOU	0.0257173	-0.62215	0.019	0.143	1
PTPN4	0.0257173	-0.772969	0.019	0.143	1
SAMD9L	0.0257173	-0.781695	0.019	0.143	1
ZSCAN21	0.0257173	-0.402394	0.019	0.143	1
ADGRA2	0.0257173	-0.71736	0.019	0.143	1
FKTN	0.0257173	-0.643486	0.019	0.143	1
IVD	0.0257173	-0.645832	0.019	0.143	1
AP3B2	0.0257173	-0.478874	0.019	0.143	1
FLYWCH1	0.0257173	-0.802229	0.019	0.143	1
AMFR	0.0257173	-0.754225	0.019	0.143	1
MKNK1	0.0257635	-0.868521	0.058	0.214	1
RNF11	0.0257635	-0.637664	0.058	0.214	1
PTK7	0.0257635	-0.666867	0.058	0.214	1
RALGAPA2	0.025891	-0.604323	0.115	0.31	1
COPA	0.0259622	-0.592144	0.096	0.286	1
LHFPL2	0.0260649	-0.811723	0.173	0.381	1
FIP1L1	0.0265299	-0.462822	0.154	0.381	1
ADCY3	0.026773	-0.268217	0.192	0.429	1
MRPL33	0.0268462	-0.677304	0.019	0.143	1
EPM2AIP1	0.0268462	-0.417785	0.019	0.143	1
AC113414.1	0.0268462	-0.870214	0.019	0.143	1
UBTD2	0.0268462	-0.8246	0.019	0.143	1
FASTK	0.0268462	-0.405308	0.019	0.143	1
RNF214	0.0268462	-0.495721	0.019	0.143	1
DERA	0.0268462	-0.439093	0.019	0.143	1
GALK2	0.0268462	-0.514139	0.019	0.143	1
MAPK6	0.0268462	-0.789743	0.019	0.143	1
MBTPS1	0.0268462	-0.59663	0.019	0.143	1
UNK	0.0268462	-0.666976	0.019	0.143	1
MIATNB	0.0268462	-0.531917	0.019	0.143	1
SQSTM1	0.0268503	-0.529597	0.135	0.357	1
FBLN2	0.0275172	-0.907546	0.077	0.238	1
AL049828.1	0.0275577	-0.879075	0.058	0.214	1
STX18	0.0277397	-0.377981	0.077	0.262	1
RAPGEF2	0.0279124	-0.254087	0.154	0.381	1
C1orf21	0.0280176	-0.56361	0.019	0.143	1
MREG	0.0280176	-0.296307	0.019	0.143	1
FLNB	0.0280176	-0.515919	0.019	0.143	1
AC104123.1	0.0280176	-0.601423	0.019	0.143	1
AC004160.1	0.0280176	-0.828865	0.019	0.143	1
SLC25A32	0.0280176	-0.254915	0.019	0.143	1
PPP6C	0.0280176	-0.467262	0.019	0.143	1
UBE2O	0.0280176	-0.528856	0.019	0.143	1
NFIB	0.0280227	1.34085	0.192	0.048	1
ITSN1	0.0281967	-0.396534	0.231	0.5	1
PKN2	0.0283232	-0.512014	0.096	0.286	1
EFCAB2	0.0284945	-0.851842	0.058	0.214	1
USP37	0.0284945	-0.849706	0.058	0.214	1
PFDN1	0.0284945	-0.949499	0.058	0.214	1
HERPUD2	0.0284945	-0.669369	0.058	0.214	1
TUSC3	0.0284945	-0.512829	0.058	0.214	1
CUL5	0.0284945	-0.587996	0.058	0.214	1
IQCK	0.0289844	-0.686303	0.096	0.262	1
CLDN11	0.0290178	-1.05861	0.231	0.429	1
DPH6	0.0290822	-0.887751	0.038	0.167	1
CLMP	0.0291503	-0.784381	0.096	0.286	1
CLIC4	0.0292776	-0.807531	0.212	0.429	1
LINC01515	0.0292913	-1.04107	0.077	0.238	1
UBR4	0.0294587	-0.594664	0.058	0.214	1
SLC9A1	0.0294587	-0.790864	0.058	0.214	1
COL23A1	0.0294587	-0.630362	0.058	0.214	1
COG6	0.0294587	-0.700924	0.058	0.214	1
JUND	0.0295337	0.902994	0.269	0.095	1
DENND5B	0.0298494	-0.81649	0.096	0.262	1
DDHD1	0.0299512	1.06334	0.192	0.048	1
SSTR2	0.0301987	1.68521	0.154	0.024	1
CLTA	0.0302147	-0.81198	0.077	0.238	1
FGD6	0.0302687	-0.761054	0.173	0.381	1
COL12A1	0.0303714	-1.39488	0.115	0.286	1
AHDC1	0.0304507	-0.57708	0.058	0.214	1
TMEM30A	0.0304507	-0.577357	0.058	0.214	1
RARB	0.0304816	-1.42028	0.173	0.357	1
NCOA1	0.0305202	-0.858088	0.462	0.643	1
TNS2	0.0306511	-0.643759	0.269	0.476	1
JUNB	0.0308669	1.68088	0.25	0.095	1
MAP2K6	0.0309575	1.19353	0.192	0.048	1
ARRDC2	0.0309575	1.26357	0.192	0.048	1
MAP4	0.0310829	-0.595074	0.404	0.667	1
PRKCH	0.031163	-0.950351	0.077	0.238	1
LRRFIP2	0.0312573	-0.670319	0.135	0.333	1
SLTM	0.0312573	-1.0146	0.135	0.333	1
PTPRK	0.0312769	1.27488	0.538	0.381	1
TSC22D3	0.0313005	1.50907	0.231	0.071	1
JCAD	0.0313519	1.14445	0.154	0.024	1
SPOCK2	0.0313519	1.31162	0.154	0.024	1
AP2A2	0.0313519	1.26222	0.154	0.024	1
STX5	0.0313519	1.30198	0.154	0.024	1
GABARAPL1	0.0313519	1.32923	0.154	0.024	1
SRSF4	0.0314009	-0.295144	0.115	0.31	1
GARS-DT	0.0314714	-0.504695	0.058	0.214	1
FBXO17	0.0314714	-0.632882	0.058	0.214	1
RFFL	0.0317235	0.817426	0.212	0.048	1
LIMA1	0.0317573	-0.583722	0.096	0.286	1
SIK3	0.0317699	-0.755097	0.308	0.548	1
CCND3	0.0319926	1.27893	0.192	0.048	1
NDUFA4L2	0.0320848	1.00917	0.308	0.119	1
RNF216	0.0325212	-0.539592	0.058	0.214	1
STXBP4	0.0325212	-0.590039	0.058	0.214	1
CEP83	0.0325427	-0.985976	0.038	0.167	1
TESC	0.0325427	1.24225	0.154	0.024	1
TOX4	0.0325427	-0.683853	0.038	0.167	1
WDFY3	0.0329173	-0.727256	0.231	0.452	1
AC012409.2	0.0330079	1.04437	0.269	0.095	1
AMBRA1	0.0330081	-0.453494	0.173	0.405	1
STAM2	0.0331363	-0.689101	0.077	0.238	1
CKMT2-AS1	0.0331363	-0.834277	0.077	0.238	1
AKT2	0.0331363	-0.896725	0.077	0.238	1
ACTR3	0.0336009	-0.563451	0.058	0.214	1
NMD3	0.033772	-1.14215	0.038	0.167	1
ISM1	0.033772	-1.0119	0.038	0.167	1
RBM25	0.0342594	-0.60269	0.154	0.357	1
RPS23	0.0345147	-0.955083	0.096	0.262	1
EDF1	0.0350408	-1.10686	0.038	0.167	1
ZNF521	0.0350408	-0.68044	0.038	0.167	1
ZIC4	0.0352157	-0.571819	0.077	0.238	1
GFPT2	0.0355425	-0.256658	0.096	0.286	1
MT-CO2	0.0356649	-0.645953	0.288	0.524	1
DAAM1	0.0362965	-0.341302	0.077	0.238	1
WDR44	0.0362965	-0.723628	0.077	0.238	1
NHLRC2	0.03635	-0.761399	0.038	0.167	1
MID1	0.03635	-0.784931	0.038	0.167	1
WDR11	0.0365482	-0.732928	0.096	0.262	1
SETD3	0.0365482	-0.74768	0.096	0.262	1
HOOK3	0.0366159	-0.570753	0.192	0.405	1
CENPC	0.0368261	-0.976759	0.115	0.286	1
NASP	0.0370258	-0.28191	0.058	0.214	1
ZNF280D	0.0370446	-0.676273	0.192	0.405	1
SDC2	0.0374055	-0.815805	0.077	0.238	1
PPWD1	0.0377007	-0.404331	0.038	0.167	1
TYW1B	0.0377007	-0.881584	0.038	0.167	1
HSPA12A	0.0377007	-0.632694	0.038	0.167	1
LMAN1	0.0377007	-0.311851	0.038	0.167	1
UTY	0.0377007	0.840811	0.154	0.024	1
ICA1L	0.037743	-1.25252	0.058	0.19	1
ITPRID2	0.0379707	1.35593	0.212	0.071	1
SCAF11	0.0380817	-0.584577	0.231	0.452	1
FARP1	0.0383002	-0.749054	0.154	0.357	1
ZNF423	0.0385431	-0.517246	0.077	0.238	1
SLC19A1	0.0386226	1.26664	0.462	0.333	1
PRKCE	0.0386828	-0.559546	0.096	0.262	1
BTF3L4	0.0390939	-0.483358	0.038	0.167	1
SRBD1	0.0390939	-0.30224	0.038	0.167	1
SLIT3	0.0390939	-0.801951	0.038	0.167	1
TULP4	0.0390939	-0.577927	0.038	0.167	1
LINC00476	0.0390939	-0.763911	0.038	0.167	1
TTC8	0.0390939	-0.817141	0.038	0.167	1
HACD3	0.0390939	-0.668734	0.038	0.167	1
BCL7C	0.0390939	-0.919457	0.038	0.167	1
ANKRD27	0.0390939	-0.917944	0.038	0.167	1
NOP58	0.0394705	0.255417	0.058	0.214	1
VCL	0.0394979	-0.575728	0.173	0.381	1
CALCOCO2	0.0394979	-0.445059	0.173	0.381	1
CELF1	0.0395047	-0.761758	0.212	0.429	1
KHDRBS1	0.03971	-0.278709	0.077	0.238	1
ATP2B4	0.03971	-0.348883	0.077	0.238	1
SLC9A9	0.03971	-0.5905	0.077	0.238	1
MTA3	0.0397893	-0.814896	0.096	0.262	1
PPP6R2	0.0399182	-0.951123	0.173	0.357	1
MARK3	0.0402452	-0.551901	0.231	0.452	1
SNX14	0.0402701	-0.933437	0.135	0.31	1
ARHGAP32	0.0404149	-0.385098	0.135	0.333	1
EIF4E	0.0405306	-0.626259	0.038	0.167	1
VCAN	0.0405306	-0.565404	0.038	0.167	1
CD164	0.0405306	-0.705575	0.038	0.167	1
TMEM106B	0.0405306	-0.620211	0.038	0.167	1
AC009879.4	0.0405306	-0.712367	0.038	0.167	1
XPNPEP1	0.0405306	-0.578459	0.038	0.167	1
CYSLTR2	0.0405306	0.721949	0.154	0.024	1
UBN1	0.0405306	-0.506112	0.038	0.167	1
PMM2	0.0405306	-0.457834	0.038	0.167	1
RANBP10	0.0405306	-0.728413	0.038	0.167	1
NHSL2	0.0409225	-0.788584	0.096	0.262	1
RNF19A	0.0409986	1.37696	0.269	0.119	1
LUC7L	0.0410143	-0.693222	0.115	0.286	1
NEBL	0.0411383	-0.69611	0.385	0.571	1
SLC38A11	0.0419385	1.32025	0.25	0.095	1
GREB1	0.0420118	-0.606058	0.038	0.167	1
AC099782.2	0.0420118	-0.638772	0.038	0.167	1
EOGT	0.0420118	-0.438402	0.038	0.167	1
GTF2IRD2B	0.0420118	-0.262573	0.038	0.167	1
TRPM3	0.0420118	-0.765755	0.038	0.167	1
B3GLCT	0.0420118	-0.408917	0.038	0.167	1
TENT4B	0.0420118	-0.622869	0.038	0.167	1
CTCF	0.0420118	-0.706277	0.038	0.167	1
ACSF2	0.0420118	-0.638038	0.038	0.167	1
YTHDC1	0.042083	-0.581712	0.096	0.262	1
ANAPC5	0.042083	-0.529599	0.096	0.262	1
PIP4K2A	0.0421223	-0.764198	0.115	0.286	1
BACH1	0.0421223	-0.612869	0.115	0.286	1
RFTN2	0.042134	-0.435661	0.077	0.238	1
CUL3	0.042134	-0.413887	0.077	0.238	1
TFG	0.042134	-0.331548	0.077	0.238	1
FNTA	0.042134	-0.352332	0.077	0.238	1
AP1G1	0.042134	-0.400962	0.077	0.238	1
IL6R	0.0430588	-0.750425	0.058	0.19	1
DDHD2	0.0430588	-0.73305	0.058	0.19	1
EIF3E	0.0432633	-1.09604	0.077	0.214	1
HEATR5B	0.0432712	-0.353137	0.096	0.262	1
ST3GAL6	0.0433922	-0.343569	0.077	0.238	1
PHF20L1	0.0433922	-0.339998	0.077	0.238	1
NEPRO	0.0435385	-0.453708	0.038	0.167	1
SLC33A1	0.0435385	-0.45882	0.038	0.167	1
GLCCI1	0.0435385	-0.629468	0.038	0.167	1
TMEM67	0.0435385	-0.387303	0.038	0.167	1
HNRNPH3	0.0435385	-0.442119	0.038	0.167	1
ZBTB7C	0.0435385	-0.43925	0.038	0.167	1
SLC27A1	0.0435385	-0.582882	0.038	0.167	1
NUTM2A-AS1	0.0435712	-0.357097	0.135	0.333	1
PELI2	0.0437523	-0.433586	0.115	0.31	1
VMP1	0.043916	-0.847699	0.173	0.357	1
PTGDS	0.0439293	-1.39301	0.538	0.738	1
WASF2	0.0440256	-0.678385	0.192	0.405	1
STK38	0.0442568	-0.575799	0.25	0.476	1
ZNF790-AS1	0.0444825	-0.855439	0.058	0.19	1
ELP4	0.044682	-0.518805	0.077	0.238	1
DNAH7	0.0451119	-0.409344	0.038	0.167	1
GDAP1	0.0451119	-0.433134	0.038	0.167	1
DLG5	0.0451119	-0.312371	0.038	0.167	1
INSR	0.0451892	-0.743234	0.269	0.5	1
SHPRH	0.0457346	-0.605771	0.135	0.31	1
PPP4R1	0.0459457	-0.788233	0.058	0.19	1
RELCH	0.0459457	-0.687781	0.058	0.19	1
ZFYVE9	0.0460039	-0.400467	0.077	0.238	1
KIAA1671	0.0460039	-0.741811	0.077	0.238	1
ZFAND1	0.046343	-0.596391	0.019	0.119	1
ADAMTS15	0.046343	-0.602534	0.019	0.119	1
MGST1	0.046343	-0.835358	0.019	0.119	1
PIGL	0.046343	-0.742767	0.019	0.119	1
DAZAP1	0.046343	-0.740754	0.019	0.119	1
LINC-PINT	0.0467329	-0.346566	0.038	0.167	1
ATG13	0.0467329	-0.251367	0.038	0.167	1
SLC38A6	0.0467329	-0.251085	0.038	0.167	1
RAD51C	0.0467329	-0.273897	0.038	0.167	1
UGP2	0.047007	-0.631569	0.096	0.262	1
ST3GAL5	0.0471131	-0.533898	0.192	0.405	1
EPN2	0.0471317	-0.60541	0.173	0.357	1
PAK1	0.0474493	-0.749538	0.058	0.19	1
TPT1-AS1	0.0482467	-0.906452	0.173	0.357	1
CAVIN2	0.0483468	-1.00984	0.019	0.119	1
GORASP1	0.0483468	-0.69477	0.019	0.119	1
AC107223.1	0.0483468	-0.572916	0.019	0.119	1
TRERF1	0.0483468	-0.618806	0.019	0.119	1
TBPL1	0.0483468	-0.979377	0.019	0.119	1
LOXL2	0.0483468	-1.06244	0.019	0.119	1
RAD52	0.0483468	-0.948922	0.019	0.119	1
MGRN1	0.0483468	-0.966019	0.019	0.119	1
TXNDC11	0.0483468	-0.987081	0.019	0.119	1
UTP6	0.0483468	-0.867517	0.019	0.119	1
GRIK5	0.0483468	-0.689429	0.019	0.119	1
AF279873.3	0.0484026	-0.600929	0.038	0.167	1
AUTS2	0.0486947	-0.529715	0.5	0.714	1
THRAP3	0.0487446	-0.539822	0.154	0.357	1
TUT4	0.0487446	-0.97391	0.173	0.333	1
AC011603.2	0.0487844	-0.86652	0.077	0.214	1
HACL1	0.048994	-1.08186	0.058	0.19	1
NFKBIZ	0.048994	-1.01416	0.058	0.19	1
UBQLN1	0.048994	-0.930963	0.058	0.19	1
SCD	0.048994	-0.821379	0.058	0.19	1
ICE2	0.048994	-0.461253	0.058	0.19	1
SPATS2L	0.049271	-0.442324	0.192	0.405	1
CHKA	0.0493039	-0.521256	0.135	0.31	1
CDC27	0.0493039	-0.715897	0.135	0.31	1
MPZL1	0.049315	-0.610058	0.115	0.286	1
GAS7	0.049315	-0.551789	0.115	0.286	1
EHMT1	0.0493837	-0.707777	0.173	0.357	1
FTX	0.0495168	-0.419436	0.712	0.952	1
SRGAP2	0.049693	-1.06676	0.154	0.333	1
NFIC	0.0499096	-0.371813	0.154	0.357	1
NUCKS1	0.0499654	-0.668349	0.231	0.452	1
SCCPDH	0.0504228	-0.646774	0.019	0.119	1
ATRAID	0.0504228	-1.24194	0.019	0.119	1
ITGA9	0.0504228	-0.590243	0.019	0.119	1
THAP6	0.0504228	-0.517946	0.019	0.119	1
KCNQ5	0.0504228	-1.00233	0.019	0.119	1
DLD	0.0504228	-0.446237	0.019	0.119	1
MBD6	0.0504228	-0.545164	0.019	0.119	1
TMEM116	0.0504228	-0.64459	0.019	0.119	1
DGLUCY	0.0504228	-0.592483	0.019	0.119	1
LPIN2	0.0504228	-0.982159	0.019	0.119	1
PRPF31	0.0504228	-0.712378	0.019	0.119	1
OLFML3	0.0505807	-1.08017	0.058	0.19	1
ANXA4	0.0505807	-0.734613	0.058	0.19	1
USP24	0.0506087	-0.614936	0.115	0.286	1
TMEM161B-AS1	0.0510106	-0.310217	0.096	0.262	1
CWF19L2	0.0510106	-0.366267	0.096	0.262	1
ZRANB2	0.0510133	-0.377053	0.173	0.381	1
NRG1	0.0511244	-1.61105	0.096	0.238	1
SGMS1	0.0512711	-0.839165	0.269	0.452	1
CTBP1	0.0513504	1.19893	0.135	0.024	1
PTPA	0.0513504	1.16182	0.135	0.024	1
ABTB2	0.0513504	1.41357	0.135	0.024	1
DAZAP2	0.0513504	1.29452	0.135	0.024	1
PPP1CC	0.0513504	1.04812	0.135	0.024	1
SLC7A5	0.0513504	0.92503	0.135	0.024	1
ANKHD1	0.051493	-0.356741	0.212	0.429	1
ZMYM4	0.0518111	-0.518012	0.135	0.31	1
PNISR	0.0521872	-0.606301	0.192	0.357	1
DHRS3	0.0522102	-0.815822	0.058	0.19	1
RAD50	0.0522102	-0.856301	0.058	0.19	1
LINC00174	0.0522102	-0.509509	0.058	0.19	1
ORC5	0.0522102	-0.791491	0.058	0.19	1
INTS10	0.0522102	-0.595956	0.058	0.19	1
NFIA	0.0522151	-0.411211	0.596	0.81	1
MCU	0.052407	-0.476943	0.096	0.262	1
ZDHHC17	0.052407	-0.471105	0.096	0.262	1
IFI6	0.0525731	-0.905242	0.019	0.119	1
NFYC	0.0525731	-0.392441	0.019	0.119	1
NBPF11	0.0525731	-0.650071	0.019	0.119	1
RMDN2	0.0525731	-0.712869	0.019	0.119	1
ORC2	0.0525731	-0.377898	0.019	0.119	1
ZNF330	0.0525731	-0.439279	0.019	0.119	1
ZNF608	0.0525731	-0.466425	0.019	0.119	1
WWC1	0.0525731	-0.797004	0.019	0.119	1
PEX7	0.0525731	-0.613046	0.019	0.119	1
PEX3	0.0525731	-0.533818	0.019	0.119	1
GTF2IRD1	0.0525731	-0.803383	0.019	0.119	1
UBE2V2	0.0525731	-0.566965	0.019	0.119	1
TCHP	0.0525731	-0.779271	0.019	0.119	1
AC009061.2	0.0525731	-0.759401	0.019	0.119	1
MTMR4	0.0525731	-0.689371	0.019	0.119	1
AATK	0.0525731	-1.00106	0.019	0.119	1
RPS17	0.0531171	1.68697	0.231	0.095	1
PLEKHG3	0.0532577	1.33769	0.135	0.024	1
CEP192	0.0533033	-0.859271	0.077	0.214	1
SULF2	0.0533033	-0.577067	0.077	0.214	1
ROR2	0.0533778	-0.592962	0.154	0.333	1
RNF152	0.0535455	1.67893	0.308	0.167	1
BAZ2B	0.0535906	-0.640135	0.288	0.5	1
BMPR1A	0.0538363	-0.622935	0.192	0.405	1
H6PD	0.0538834	-0.328376	0.058	0.19	1
CD46	0.0538834	-0.698298	0.058	0.19	1
INO80	0.0538834	-0.515186	0.058	0.19	1
ZNF133	0.0538834	-0.463367	0.058	0.19	1
MAMDC2	0.0540325	-1.01973	0.096	0.238	1
KANSL1	0.0547876	-0.396696	0.365	0.571	1
PRPF38B	0.0547995	-0.4125	0.019	0.119	1
SMC6	0.0547995	-0.378579	0.019	0.119	1
DCAF17	0.0547995	-0.634367	0.019	0.119	1
PIGX	0.0547995	-0.320809	0.019	0.119	1
AC108519.1	0.0547995	-0.588234	0.019	0.119	1
AC002460.2	0.0547995	-0.881975	0.019	0.119	1
LEMD2	0.0547995	-0.269652	0.019	0.119	1
MMS22L	0.0547995	-0.333643	0.019	0.119	1
GPNMB	0.0547995	-0.49362	0.019	0.119	1
COPG2	0.0547995	-0.578394	0.019	0.119	1
UTP23	0.0547995	-0.659869	0.019	0.119	1
CCN4	0.0547995	-0.349105	0.019	0.119	1
ZNF782	0.0547995	-0.50823	0.019	0.119	1
AL117336.2	0.0547995	-0.470584	0.019	0.119	1
NDUFV1	0.0547995	-0.438411	0.019	0.119	1
UFM1	0.0547995	-0.345647	0.019	0.119	1
PHF11	0.0547995	-0.842295	0.019	0.119	1
WDFY2	0.0547995	-0.290948	0.019	0.119	1
JDP2	0.0547995	-0.407872	0.019	0.119	1
GANC	0.0547995	-0.604973	0.019	0.119	1
GABPB1	0.0547995	-0.523945	0.019	0.119	1
MAN2C1	0.0547995	-0.359417	0.019	0.119	1
MED1	0.0547995	-0.361285	0.019	0.119	1
PGPEP1	0.0547995	-0.595785	0.019	0.119	1
PHLDB3	0.0547995	-0.687845	0.019	0.119	1
NAPA	0.0547995	-0.321711	0.019	0.119	1
SLC9A8	0.0547995	-0.386456	0.019	0.119	1
NOL12	0.0547995	-0.351431	0.019	0.119	1
KPNB1	0.0548852	-0.791564	0.077	0.214	1
TNIK	0.0552237	0.879697	0.135	0.024	1
ATE1	0.0555017	-0.630793	0.192	0.381	1
MLLT10	0.0555208	-0.76893	0.231	0.452	1
SPRY4	0.0556012	-0.319187	0.058	0.19	1
RUFY1	0.0556012	-0.539301	0.058	0.19	1
ELP3	0.0556012	-0.531694	0.058	0.19	1
FNIP1	0.0561116	-0.326553	0.212	0.429	1
RGS5	0.0562008	0.865453	0.25	0.095	1
FGF2	0.0565061	-0.70357	0.077	0.214	1
SDK1	0.0565061	-0.890741	0.077	0.214	1
PLXDC2	0.056787	-0.85688	0.346	0.524	1
PCNX4	0.0570914	-0.75649	0.135	0.286	1
PTGFR	0.0571039	-0.414803	0.019	0.119	1
NCKAP5	0.0571039	-0.566815	0.019	0.119	1
LINC02062	0.0571039	-0.310435	0.019	0.119	1
C12orf73	0.0571039	-0.274237	0.019	0.119	1
NME3	0.0571039	-0.284473	0.019	0.119	1
CDK10	0.0571039	-0.285046	0.019	0.119	1
ASPSCR1	0.0571039	-0.379228	0.019	0.119	1
CDKL5	0.0571039	-0.46471	0.019	0.119	1
GNL3L	0.0571039	-0.689803	0.019	0.119	1
SRSF5	0.0571459	-0.539993	0.135	0.31	1
ZBTB20-AS5	0.05725	0.878148	0.135	0.024	1
LINC01138	0.0573643	0.883257	0.173	0.048	1
GCFC2	0.0573643	-0.468799	0.058	0.19	1
APCDD1	0.0573643	0.953325	0.173	0.048	1
TLK2	0.0575464	-0.286313	0.096	0.262	1
SVIL	0.0576234	-0.502851	0.442	0.643	1
SAMD4A	0.0579885	-0.476414	0.173	0.357	1
RNF38	0.0581666	-0.771739	0.077	0.214	1
NAA35	0.0581666	-0.344395	0.077	0.214	1
ATAD2B	0.0583534	-0.841802	0.154	0.31	1
FER	0.0585473	1.31189	0.365	0.238	1
NSMCE2	0.0585473	-0.314302	0.212	0.429	1
FOXN3	0.0586434	-0.552963	0.154	0.333	1
COP1	0.0586466	-0.547166	0.173	0.357	1
MAP1B	0.0587114	1.29768	0.365	0.214	1
COL18A1	0.0591928	-0.64748	0.269	0.452	1
AC092958.1	0.0592968	-0.606014	0.192	0.381	1
CNN3	0.0593139	-0.664162	0.173	0.357	1
ANKS1B	0.0593139	-0.64463	0.173	0.357	1
ITGA9-AS1	0.0593376	0.864249	0.135	0.024	1
ECM2	0.0598675	-0.571423	0.077	0.214	1
TTC14	0.0599801	-0.30573	0.135	0.31	1
LSM14A	0.0600251	-0.478533	0.154	0.333	1
AC005670.3	0.0604049	-0.982067	0.038	0.143	1
AFF1	0.0609505	-0.258511	0.231	0.452	1
CUL4A	0.0610301	-0.352516	0.058	0.19	1
MGLL	0.0611826	1.06955	0.288	0.143	1
SLC1A3	0.0613609	-0.491186	0.519	0.738	1
LYPLAL1	0.0614404	-0.376977	0.135	0.31	1
GIGYF2	0.0614404	-0.677984	0.135	0.31	1
SUMO2	0.061488	0.742244	0.135	0.024	1
FRRS1L	0.0625872	-0.81779	0.038	0.143	1
ALX4	0.0625872	-0.784526	0.038	0.143	1
ASCC3	0.0627945	1.47279	0.25	0.119	1
WDPCP	0.0628697	-0.513408	0.154	0.333	1
SRSF10	0.063393	-0.600808	0.077	0.214	1
CCDC30	0.063393	-0.512899	0.077	0.214	1
KCTD3	0.063393	-0.611818	0.077	0.214	1
PBRM1	0.063393	-0.718187	0.077	0.214	1
SKIL	0.063393	-0.700964	0.077	0.214	1
GKAP1	0.063393	-0.554779	0.077	0.214	1
EEA1	0.0635962	-0.859787	0.096	0.238	1
YWHAH	0.0637181	0.773532	0.212	0.071	1
COL6A3	0.063909	-0.797107	0.115	0.262	1
LDLRAD3	0.0643641	-0.443561	0.327	0.524	1
YME1L1	0.0644492	-0.415526	0.135	0.31	1
ADCY5	0.0645438	-0.802244	0.135	0.286	1
FXYD6	0.0645438	1.18885	0.269	0.119	1
PRKAR1A	0.0645438	0.978605	0.269	0.119	1
SEC24D	0.0648879	-0.257613	0.058	0.19	1
CASTOR3	0.0651787	-0.312966	0.115	0.286	1
EXT1	0.0652162	-0.989564	0.192	0.357	1
TBC1D8	0.0652192	-0.815199	0.077	0.214	1
ACIN1	0.0652192	-0.408545	0.077	0.214	1
SDCCAG8	0.0653187	-0.709805	0.096	0.238	1
ATG5	0.0653187	-0.550643	0.096	0.238	1
AL137139.2	0.0653187	-0.76954	0.096	0.238	1
URB1	0.0653187	-0.739939	0.096	0.238	1
PLEKHG1	0.0654085	-0.477952	0.212	0.381	1
PRKAR2A	0.0655509	-0.865121	0.115	0.262	1
FUT10	0.0655509	-0.775466	0.115	0.262	1
ATXN10	0.0658248	-0.372384	0.154	0.333	1
SAT1	0.0665807	-0.603886	0.288	0.5	1
EPB41L3	0.0668123	-1.03537	0.212	0.381	1
FBXO9	0.0670794	-0.645405	0.096	0.238	1
SECISBP2L	0.0670794	-0.578343	0.096	0.238	1
NDUFAF6	0.0670884	-0.481888	0.077	0.214	1
EP400	0.0670884	-0.472952	0.077	0.214	1
RHOT1	0.0670884	-0.413293	0.077	0.214	1
BCL2L1	0.0670884	1.38465	0.192	0.071	1
KDR	0.0671476	-0.756868	0.038	0.143	1
AL078604.4	0.0671476	-1.37274	0.038	0.143	1
MLH3	0.0671476	-0.893814	0.038	0.143	1
AP2B1	0.0673354	0.695892	0.231	0.095	1
GABBR1	0.0675787	-0.284261	0.135	0.31	1
KPNA3	0.0687534	-0.553368	0.154	0.31	1
USP48	0.0688791	-0.65492	0.096	0.238	1
CTTN	0.0688791	-0.728346	0.096	0.238	1
TBCA	0.068881	-0.458272	0.25	0.452	1
TBC1D23	0.0690016	-0.294529	0.077	0.214	1
TNS3	0.0690016	1.16499	0.192	0.071	1
CDK12	0.0690016	-0.63822	0.077	0.214	1
CD99	0.0690016	-0.347954	0.077	0.214	1
LINC01278	0.0693121	-0.353311	0.173	0.357	1
ZNF197	0.0695284	-0.9536	0.038	0.143	1
TMEM168	0.0695284	-0.672881	0.038	0.143	1
TTC39B	0.0695284	-0.724896	0.038	0.143	1
FN1	0.0703679	1.1617	0.308	0.167	1
DNAJC10	0.0707182	-0.519807	0.096	0.238	1
WDR41	0.0709594	-0.382777	0.077	0.214	1
PLAGL1	0.0709594	-0.600613	0.077	0.214	1
LDHB	0.0709594	-0.458397	0.077	0.214	1
IFT88	0.0709594	-0.413278	0.077	0.214	1
RICTOR	0.0711734	-0.288183	0.192	0.405	1
UACA	0.0717369	-0.476287	0.385	0.643	1
DHX36	0.0719781	-0.745997	0.038	0.143	1
AP002026.1	0.0719781	-0.831235	0.038	0.143	1
WASF1	0.0719781	-0.546175	0.038	0.143	1
CCDC171	0.0719781	-0.824759	0.038	0.143	1
ZSCAN18	0.0719781	-0.494055	0.038	0.143	1
TAF1	0.0719781	-0.8318	0.038	0.143	1
CNNM2	0.0719888	-0.756015	0.154	0.31	1
SLC6A13	0.072311	-0.760094	0.231	0.429	1
NCOR1	0.072311	-0.480907	0.231	0.429	1
SUCLG2	0.0725974	-0.550092	0.096	0.238	1
VPS13D	0.0727589	0.311572	0.173	0.405	1
SLC30A9	0.0729624	-0.281989	0.077	0.214	1
MSH3	0.0729624	-0.294988	0.077	0.214	1
PTOV1	0.0729624	1.35359	0.192	0.071	1
GPCPD1	0.0729624	-0.550554	0.077	0.214	1
BSG	0.0739542	1.3177	0.365	0.214	1
ANXA5	0.0742903	-0.828291	0.115	0.262	1
DIXDC1	0.0742903	-0.525524	0.115	0.262	1
RNF144A	0.0744981	-0.731757	0.038	0.143	1
GMCL1	0.0744981	-0.720376	0.038	0.143	1
AGPS	0.0744981	-0.473232	0.038	0.143	1
MCCC2	0.0744981	-0.377284	0.038	0.143	1
ARMC2	0.0744981	-1.0836	0.038	0.143	1
MINDY4	0.0744981	-0.562907	0.038	0.143	1
LRP4	0.0744981	-0.516959	0.038	0.143	1
PC	0.0744981	-0.569116	0.038	0.143	1
MRPS35	0.0744981	-0.448917	0.038	0.143	1
PUS7L	0.0744981	-0.782616	0.038	0.143	1
SLC12A6	0.0744981	-0.672028	0.038	0.143	1
CDR2	0.0744981	-0.745506	0.038	0.143	1
C3	0.0744981	-0.310973	0.038	0.143	1
CEP89	0.0744981	-0.566375	0.038	0.143	1
CSPP1	0.074528	-0.853876	0.135	0.286	1
EPG5	0.0750116	-0.390849	0.077	0.214	1
AC118549.1	0.0754874	-0.290458	0.212	0.405	1
HIF3A	0.0756212	-0.531333	0.173	0.357	1
COX7A2	0.0756878	-1.06877	0.058	0.167	1
ZNF248	0.0756878	-0.957072	0.058	0.167	1
CLIP1	0.0761477	-0.636636	0.115	0.262	1
WWTR1	0.0768544	-0.64993	0.25	0.429	1
SLC6A1	0.076986	-0.41892	0.308	0.524	1
MIPOL1	0.0770819	-0.612473	0.154	0.31	1
MTF2	0.0770896	-0.54446	0.038	0.143	1
PLXNA2	0.0770896	-0.396202	0.038	0.143	1
GPR137B	0.0770896	-0.496891	0.038	0.143	1
DCP2	0.0770896	-0.46775	0.038	0.143	1
SLC2A12	0.0770896	-0.527663	0.038	0.143	1
CEMIP2	0.0770896	-0.544806	0.038	0.143	1
FGFR2	0.0770896	-0.639466	0.038	0.143	1
ISLR	0.0770896	-0.665405	0.038	0.143	1
SLC16A6	0.0770896	-0.448471	0.038	0.143	1
GIPC1	0.0770896	-0.571541	0.038	0.143	1
ZBTB8OS	0.0771074	-0.275422	0.077	0.214	1
PTPRJ	0.0771074	-0.502316	0.077	0.214	1
TENM3	0.0780586	-0.64536	0.058	0.167	1
CCDC66	0.078124	-0.818891	0.135	0.286	1
MARCH6	0.0783102	-0.345176	0.192	0.381	1
RPL29	0.0784814	-0.405875	0.096	0.238	1
USP47	0.0786315	-0.564134	0.212	0.405	1
AEBP2	0.0789586	-0.977017	0.212	0.381	1
BTBD8	0.0797541	-0.350241	0.038	0.143	1
TSNAX	0.0797541	-0.518887	0.038	0.143	1
ANKRD36B	0.0797541	-0.453183	0.038	0.143	1
EEF1AKMT2	0.0797541	-0.393776	0.038	0.143	1
AP006621.3	0.0797541	-0.588281	0.038	0.143	1
SARNP	0.0797541	-0.536416	0.038	0.143	1
MAPKAPK5	0.0797541	-0.615482	0.038	0.143	1
ERCC5	0.0797541	-0.459246	0.038	0.143	1
RNF167	0.0797541	-0.650349	0.038	0.143	1
TUBD1	0.0797541	-0.563415	0.038	0.143	1
PISD	0.0797541	-0.531644	0.038	0.143	1
RPGR	0.0797541	-0.48338	0.038	0.143	1
SPTBN1	0.0799605	0.686241	0.615	0.571	1
MINDY3	0.0799761	-0.912937	0.115	0.262	1
ZNF438	0.0804894	-0.917918	0.058	0.167	1
FRMD4A	0.0813575	0.637285	0.385	0.214	1
MPDZ	0.08137	-0.289679	0.135	0.31	1
MAU2	0.0814423	-0.332888	0.077	0.214	1
GATAD2B	0.0818601	-0.528497	0.135	0.286	1
TRPS1	0.0821867	-0.369158	0.25	0.452	1
KCNQ3	0.0823896	-0.837759	0.192	0.333	1
ATF6B	0.0824931	-0.39005	0.038	0.143	1
PSPH	0.0824931	-0.299604	0.038	0.143	1
SMARCD3	0.0824931	-0.392164	0.038	0.143	1
LTBP3	0.0824931	-0.548037	0.038	0.143	1
AP003086.1	0.0824931	-0.321568	0.038	0.143	1
GTF3C1	0.0824931	-0.321545	0.038	0.143	1
RPAIN	0.0824931	-0.584246	0.038	0.143	1
WDR26	0.0826156	-0.589638	0.096	0.238	1
CGNL1	0.0826156	-0.532549	0.096	0.238	1
LRRC40	0.0829814	-0.839983	0.058	0.167	1
NEK4	0.0829814	-0.666158	0.058	0.167	1
C2CD3	0.0829814	-0.700699	0.058	0.167	1
MT-ATP6	0.0834229	0.724112	0.442	0.286	1
ATP6V0C	0.0840348	1.02145	0.25	0.119	1
HIPK1	0.0842507	1.06253	0.154	0.048	1
SLC30A10	0.0843175	0.961416	0.288	0.143	1
STK33	0.0845665	-0.684639	0.077	0.19	1
CSAD	0.0847479	-0.50355	0.096	0.238	1
NFKBIA	0.0847479	1.1857	0.212	0.095	1
DLC1	0.085085	0.836462	0.654	0.595	1
ZCCHC17	0.0853078	-0.275889	0.038	0.143	1
PHTF1	0.0853078	-0.25207	0.038	0.143	1
TMEM33	0.0853078	-0.261361	0.038	0.143	1
RNF146	0.0853078	-0.490948	0.038	0.143	1
LRRC28	0.0853078	-0.283199	0.038	0.143	1
ZNF566	0.0853078	-0.28902	0.038	0.143	1
PLA2G4C	0.0853078	-0.359912	0.038	0.143	1
TRAPPC10	0.0853078	-0.344391	0.038	0.143	1
PRKCI	0.0855356	-0.517585	0.058	0.167	1
IARS	0.0860106	-0.380658	0.115	0.262	1
RBM26	0.0860106	-0.520344	0.115	0.262	1
FAM222B	0.0860106	-0.523958	0.115	0.262	1
PPP3CB	0.0863494	-0.555882	0.231	0.405	1
CENPP	0.0863511	-0.66847	0.231	0.405	1
ARHGEF12	0.0864078	1.02273	0.385	0.262	1
EFHD2	0.0868007	0.83471	0.115	0.024	1
ANKRD37	0.0868007	1.09475	0.115	0.024	1
PDP1	0.0868007	0.578417	0.115	0.024	1
GALNT18	0.0868007	1.62652	0.115	0.024	1
PPIG	0.0869245	1.40229	0.212	0.095	1
RAP1A	0.0875038	-0.620922	0.173	0.333	1
NKTR	0.0877851	-0.395829	0.173	0.357	1
TPCN1	0.0878526	-0.687249	0.192	0.357	1
DCAF5	0.088083	1.11975	0.269	0.143	1
TRPC4AP	0.088102	-0.470628	0.115	0.262	1
SH3GLB1	0.0881996	-0.29339	0.038	0.143	1
EPHA7	0.0881996	-0.600783	0.038	0.143	1
PAM16	0.0881996	-0.271385	0.038	0.143	1
CRTC3	0.0882194	-0.445315	0.288	0.476	1
ADGRL2	0.0883134	0.71959	0.192	0.071	1
AL136171.2	0.0883134	0.865431	0.192	0.071	1
B2M	0.0883632	1.17156	0.442	0.31	1
PURB	0.0894856	0.95984	0.154	0.048	1
USP40	0.0897667	-0.526203	0.135	0.286	1
AKAP12	0.0898144	-0.455038	0.231	0.405	1
SLC25A4	0.0899212	0.975746	0.115	0.024	1
VEGFA	0.0899212	0.588174	0.115	0.024	1
NCOA4	0.0899212	0.604027	0.115	0.024	1
TMOD2	0.0899212	1.09857	0.115	0.024	1
ATP5PF	0.0899212	1.08168	0.115	0.024	1
DENND4C	0.0905868	-0.65184	0.192	0.333	1
ZRANB2-AS2	0.0908344	-0.505035	0.058	0.167	1
SMAD6	0.0908344	-0.632441	0.058	0.167	1
LSAMP	0.0914131	1.3232	0.212	0.095	1
CHPT1	0.0914131	0.776414	0.212	0.095	1
TOMM7	0.0921996	1.1392	0.154	0.048	1
WASF3	0.0924077	-0.446197	0.115	0.262	1
ZCCHC24	0.0928432	-0.492427	0.212	0.381	1
MARCKSL1	0.0931314	0.892521	0.115	0.024	1
CUTA	0.0931314	0.596681	0.115	0.024	1
ZCCHC8	0.0931314	0.724778	0.115	0.024	1
NAA38	0.0931314	0.913233	0.115	0.024	1
CDH6	0.0931483	0.798469	0.192	0.071	1
MT-ND4	0.0932359	0.881985	0.423	0.31	1
TNRC6A	0.0933483	-0.4898	0.308	0.5	1
PTP4A2	0.0935811	-0.698421	0.058	0.167	1
AK4	0.0935811	-0.477462	0.058	0.167	1
SNX2	0.0935811	-0.512192	0.058	0.167	1
LMBRD1	0.0935811	-0.719406	0.058	0.167	1
MRTFA	0.0939445	-0.423624	0.135	0.286	1
CHST15	0.0941861	-0.961954	0.154	0.286	1
PLXDC1	0.0941861	1.07228	0.269	0.143	1
NSD1	0.0948021	-0.620762	0.269	0.429	1
CLDN5	0.0949793	1.34335	0.154	0.048	1
MPP6	0.0955516	-0.992712	0.115	0.238	1
GABPB1-AS1	0.0957575	-0.821043	0.077	0.19	1
ZEB2	0.0960861	0.919869	0.212	0.095	1
AC093535.1	0.0960861	1.12155	0.212	0.095	1
SKP1	0.0960861	-0.317898	0.096	0.238	1
ASXL1	0.0960912	-0.4427	0.135	0.286	1
ZMYM6	0.0963941	-0.311302	0.058	0.167	1
EIF2A	0.0963941	-0.538561	0.058	0.167	1
SETX	0.0963941	-0.335706	0.058	0.167	1
LTBP4	0.0963941	-1.01204	0.058	0.167	1
ZBTB46	0.0972549	-0.531691	0.173	0.333	1
TGFBR3	0.0976708	-0.511697	0.346	0.571	1
DUSP1	0.0978257	0.892079	0.154	0.048	1
GP1BB	0.0978257	0.840012	0.154	0.048	1
PIBF1	0.0983013	-0.472517	0.154	0.31	1
FRMD6	0.0985117	-0.315019	0.308	0.5	1
CTNNA1	0.0987418	-0.358561	0.25	0.429	1
PEAK1	0.0989395	1.19416	0.288	0.167	1
KATNA1	0.0992743	-0.492909	0.058	0.167	1
DTD1	0.0992743	-0.366317	0.058	0.167	1
RHOT2	0.0998274	0.607382	0.115	0.024	1
OLFM2	0.0998274	0.947925	0.115	0.024	1
ABHD18	0.100263	-0.990237	0.115	0.238	1
SLC38A2	0.100278	1.61264	0.404	0.333	1
SGCD	0.100502	-0.435902	0.135	0.286	1
GABARAPL2	0.10074	0.854882	0.154	0.048	1
DIP2B	0.101391	-0.274923	0.173	0.333	1
FLRT2	0.101483	-0.55953	0.404	0.595	1
CCT4	0.102223	-0.279993	0.058	0.167	1
RAP1GDS1	0.102223	-0.4427	0.058	0.167	1
PRMT9	0.102223	-0.298058	0.058	0.167	1
MTMR12	0.102223	0.421714	0.058	0.167	1
BHMT2	0.102223	-0.644633	0.058	0.167	1
LRP6	0.102223	-0.397948	0.058	0.167	1
PRPF3	0.102443	-0.700064	0.096	0.214	1
RAB30-DT	0.102475	-0.688558	0.077	0.19	1
LDB2	0.102687	-0.635704	0.115	0.238	1
FAM120B	0.102767	-0.341328	0.135	0.286	1
HSPA8	0.103452	1.03733	0.212	0.095	1
NCK2	0.103723	0.727094	0.154	0.048	1
USP9Y	0.103723	0.375041	0.154	0.048	1
COL4A5	0.104492	-0.356773	0.212	0.381	1
NID1	0.104891	-0.590399	0.442	0.643	1
FAF1	0.105003	-0.422614	0.25	0.452	1
GTF2I	0.105005	-0.326284	0.25	0.452	1
PPARA	0.105051	-1.02777	0.096	0.214	1
SPSB1	0.105241	-0.32501	0.058	0.167	1
UQCRH	0.105241	-0.438832	0.058	0.167	1
TRMT13	0.105241	-0.386411	0.058	0.167	1
UBP1	0.105241	-0.382061	0.058	0.167	1
CPEB4	0.105241	-0.372443	0.058	0.167	1
CLASRP	0.105241	-0.339294	0.058	0.167	1
AL008633.1	0.105241	-0.535262	0.058	0.167	1
ARL5A	0.105264	-0.550312	0.077	0.19	1
SLF1	0.105264	-0.765355	0.077	0.19	1
COA1	0.105264	-0.320694	0.077	0.19	1
R3HDM2	0.105832	-0.720106	0.308	0.452	1
CDKAL1	0.105974	-0.64414	0.269	0.429	1
ATP6V0B	0.106902	0.585897	0.115	0.024	1
MAFK	0.106902	0.380812	0.115	0.024	1
SBDS	0.106902	0.516246	0.115	0.024	1
EHD2	0.106902	0.530403	0.115	0.024	1
CPNE1	0.106902	0.377024	0.115	0.024	1
GRM3	0.107087	0.656736	0.288	0.143	1
ROR1	0.108112	-0.486415	0.077	0.19	1
ME1	0.108112	-0.468083	0.077	0.19	1
MSL1	0.108112	-0.568275	0.077	0.19	1
SARS	0.108329	-0.592154	0.058	0.167	1
PABPC1	0.108623	-0.408157	0.212	0.381	1
CDC42EP4	0.108823	1.22231	0.231	0.119	1
EP300	0.109747	-0.649718	0.154	0.286	1
RSBN1L	0.111021	-0.458703	0.077	0.19	1
METTL7A	0.11126	1.08453	0.212	0.095	1
TTC7B	0.111488	-0.280863	0.058	0.167	1
PCBP3	0.112168	1.19777	0.288	0.167	1
RUFY2	0.112852	-0.610616	0.115	0.238	1
ADK	0.113319	-0.392547	0.269	0.452	1
MTR	0.113991	-0.463942	0.077	0.19	1
THUMPD2	0.113991	-0.359481	0.077	0.19	1
TMEM41B	0.113991	-0.404945	0.077	0.19	1
GLCE	0.113991	-0.34683	0.077	0.19	1
GGNBP2	0.113991	-0.371056	0.077	0.19	1
TSC22D1	0.114547	0.536804	0.423	0.286	1
CABIN1	0.114719	-0.544227	0.058	0.167	1
HLA-E	0.1155	1.23129	0.173	0.071	1
GRB2	0.1155	1.09442	0.173	0.071	1
SLC25A36	0.116014	-0.615232	0.096	0.214	1
DPP10	0.116718	1.07113	0.212	0.095	1
GPR107	0.117024	-0.430641	0.077	0.19	1
MAPK8IP3	0.117024	-0.514136	0.077	0.19	1
PDE7B	0.117439	1.19636	0.385	0.31	1
ZRANB3	0.11856	-0.426465	0.077	0.19	1
STT3B	0.118564	0.961473	0.173	0.071	1
RHEB	0.11889	-0.315252	0.096	0.214	1
ZHX2	0.119285	-0.740122	0.173	0.31	1
ARHGAP6	0.119285	0.886511	0.288	0.167	1
PPFIBP1	0.11942	-0.609587	0.327	0.476	1
CALD1	0.119498	1.08779	0.519	0.476	1
PRMT2	0.119781	1.16575	0.25	0.143	1
SGK3	0.120984	-0.58713	0.115	0.238	1
KAT6B	0.121013	-0.698756	0.135	0.262	1
RUFY3	0.121059	-0.925383	0.212	0.333	1
MED13L	0.121443	-0.305955	0.346	0.548	1
PLOD2	0.121691	0.786517	0.173	0.071	1
S1PR3	0.121691	1.38556	0.173	0.071	1
TSPAN9	0.121691	1.06398	0.173	0.071	1
OLA1	0.121735	-0.691937	0.173	0.31	1
RPL9	0.121822	-0.506916	0.096	0.214	1
FOXJ3	0.122385	0.773449	0.212	0.095	1
ADCY2	0.122385	0.763253	0.212	0.095	1
INTS6	0.123279	-0.312931	0.077	0.19	1
LSS	0.123279	-0.358335	0.077	0.19	1
CHD6	0.125152	-0.584907	0.192	0.333	1
UBE4B	0.125826	-0.311297	0.192	0.357	1
OPA1	0.126323	-0.526565	0.096	0.214	1
SLCO3A1	0.126329	-0.966856	0.038	0.119	1
AC046134.2	0.126503	-0.399361	0.077	0.19	1
NDUFB2	0.127464	1.02498	0.231	0.119	1
NRP2	0.127856	-0.52151	0.096	0.214	1
SEC22A	0.127856	-0.388635	0.096	0.214	1
LINC01088	0.128095	-0.33543	0.442	0.595	1
TMTC2	0.128139	1.02061	0.173	0.071	1
ARHGAP24	0.129188	-0.454924	0.135	0.262	1
ZXDC	0.1294	1.11183	0.192	0.095	1
NAE1	0.129788	-0.276062	0.077	0.19	1
CBX5	0.129946	-0.627244	0.154	0.286	1
NINJ2	0.130526	-0.900463	0.038	0.119	1
SEPTIN4	0.130526	-0.432018	0.038	0.119	1
HSPD1	0.130529	0.989428	0.135	0.048	1
ARPC4	0.130529	1.03174	0.135	0.048	1
CWC27	0.130529	1.10581	0.135	0.048	1
HMGN3	0.130529	1.08841	0.135	0.048	1
CCDC85B	0.130529	1.48242	0.135	0.048	1
ARL6IP1	0.130529	0.842091	0.135	0.048	1
SH2B1	0.130529	1.21035	0.135	0.048	1
TPD52L2	0.130529	0.689271	0.135	0.048	1
PCCA	0.130732	-0.333664	0.442	0.619	1
OGDH	0.130959	-0.447541	0.096	0.214	1
CLOCK	0.132007	-0.585727	0.135	0.262	1
CBFB	0.132661	-0.611597	0.154	0.286	1
PJA2	0.133222	0.821547	0.231	0.119	1
SCFD2	0.13412	-0.435489	0.096	0.214	1
KIAA1217	0.13412	-0.532747	0.096	0.214	1
ZBTB38	0.134389	1.23203	0.288	0.19	1
LINC01376	0.13483	-0.616628	0.038	0.119	1
STAMBP	0.13483	-0.708677	0.038	0.119	1
CLIC1	0.13483	-0.793584	0.038	0.119	1
PRDM1	0.13483	-0.598242	0.038	0.119	1
SCAI	0.13483	-0.986759	0.038	0.119	1
ATP6V0A2	0.13483	-0.911712	0.038	0.119	1
NPC2	0.13483	-1.40843	0.038	0.119	1
AC245060.5	0.13483	-0.997238	0.038	0.119	1
A2M	0.134849	0.867933	0.173	0.071	1
SLC25A13	0.134873	-0.597034	0.135	0.262	1
APC	0.135722	1.45791	0.192	0.095	1
LGALS1	0.13573	0.669706	0.365	0.238	1
SSBP2	0.135958	0.738199	0.462	0.381	1
WDR7	0.137339	-0.275524	0.096	0.214	1
HPS3	0.138281	0.787319	0.135	0.048	1
NECAB1	0.138281	0.857899	0.135	0.048	1
BAZ1A	0.138281	0.935942	0.135	0.048	1
ABHD2	0.138281	0.985783	0.135	0.048	1
JUP	0.138281	0.86844	0.135	0.048	1
NDUFB7	0.138281	0.912875	0.135	0.048	1
FEZ2	0.138305	0.869009	0.173	0.071	1
NHSL1	0.138616	-0.476245	0.115	0.238	1
FBN1	0.138705	0.580552	0.212	0.381	1
UGDH-AS1	0.139243	-1.03221	0.038	0.119	1
ANAPC10	0.139243	-0.585918	0.038	0.119	1
DAPK1	0.139243	-0.910918	0.038	0.119	1
TSC1	0.139243	-0.289773	0.038	0.119	1
SELENOH	0.139243	-0.634099	0.038	0.119	1
COPS2	0.139243	-0.474875	0.038	0.119	1
AC016705.2	0.139243	-0.41691	0.038	0.119	1
FAM174B	0.139243	-0.707632	0.038	0.119	1
NME2	0.139243	-0.550902	0.038	0.119	1
PLTP	0.139243	-0.794853	0.038	0.119	1
CYP1B1	0.139715	-0.798209	0.192	0.31	1
RREB1	0.139988	1.12903	0.269	0.167	1
HIPK3	0.139988	-0.507777	0.154	0.31	1
ZNF609	0.140496	-0.611514	0.192	0.333	1
KCTD9	0.140618	-0.377147	0.096	0.214	1
ULK4	0.141738	-0.379217	0.115	0.238	1
H2AFY	0.141738	-0.436569	0.115	0.238	1
DENND3	0.141828	0.556352	0.173	0.071	1
EIF2B3	0.142287	-1.02976	0.058	0.143	1
QRSL1	0.142287	0.779301	0.135	0.048	1
QRICH2	0.142287	-0.845426	0.058	0.143	1
SNAP25	0.142287	1.1324	0.135	0.048	1
PRPF6	0.142287	1.10327	0.135	0.048	1
TMEM135	0.142773	-0.337696	0.173	0.31	1
NUFIP2	0.142773	-0.521734	0.173	0.31	1
APPBP2	0.142773	-0.351534	0.173	0.31	1
CREBRF	0.14281	0.847061	0.269	0.167	1
FBXL7	0.142925	-0.315968	0.308	0.476	1
GRAMD2B	0.14312	-0.355855	0.385	0.548	1
APOLD1	0.143188	0.829882	0.308	0.19	1
TSPAN5	0.143622	-0.437013	0.231	0.381	1
HECTD1	0.143759	-0.45098	0.135	0.262	1
NFATC3	0.143759	-0.568486	0.135	0.262	1
STIMATE	0.143766	-0.30078	0.038	0.119	1
SPP1	0.143766	-0.649427	0.038	0.119	1
HS3ST5	0.143766	-0.574389	0.038	0.119	1
OLAH	0.143766	-0.56031	0.038	0.119	1
CUL2	0.143766	-0.496438	0.038	0.119	1
CLPX	0.143766	-0.534865	0.038	0.119	1
SF3B3	0.143766	-0.273462	0.038	0.119	1
RAB22A	0.143766	-0.271604	0.038	0.119	1
FIGN	0.143963	-0.379896	0.154	0.286	1
SERF2	0.1452	0.835253	0.327	0.214	1
NSRP1	0.145588	-0.503886	0.173	0.31	1
MAGED1	0.145648	1.07954	0.192	0.095	1
FNBP1	0.145752	-0.394549	0.231	0.405	1
TNXB	0.145919	-0.459134	0.192	0.333	1
HELQ	0.146063	-0.483024	0.038	0.119	1
ST5	0.146216	-0.443133	0.231	0.381	1
TF	0.146382	-1.12147	0.058	0.143	1
MFSD14C	0.146382	-0.566817	0.058	0.143	1
FAM107B	0.146382	0.879773	0.135	0.048	1
AC023509.6	0.146382	1.19649	0.135	0.048	1
SHROOM4	0.146382	0.986934	0.135	0.048	1
FHIT	0.146872	-0.57468	0.288	0.476	1
VPS41	0.148144	-0.28386	0.115	0.238	1
RAB14	0.148144	-0.278588	0.115	0.238	1
KDM4A	0.148401	-0.455807	0.038	0.119	1
UBA3	0.148401	-0.315949	0.038	0.119	1
ZBTB11	0.148401	-0.610269	0.038	0.119	1
ADH5	0.148401	-0.436042	0.038	0.119	1
LARP7	0.148401	-0.430875	0.038	0.119	1
TMEM144	0.148401	-0.456461	0.038	0.119	1
SPCS3	0.148401	-0.988923	0.038	0.119	1
LYRM4	0.148401	-0.448382	0.038	0.119	1
CHD7	0.148401	-0.360625	0.038	0.119	1
FBXO32	0.148401	-0.564763	0.038	0.119	1
LDB1	0.148401	-0.363913	0.038	0.119	1
DRAM1	0.148401	-0.493322	0.038	0.119	1
TDG	0.148401	-0.367779	0.038	0.119	1
IRS2	0.148401	-0.392901	0.038	0.119	1
RTF1	0.148401	-0.379632	0.038	0.119	1
SEC11A	0.148401	-0.374699	0.038	0.119	1
GNG7	0.148401	-0.374926	0.038	0.119	1
DPY19L3	0.148401	-0.3187	0.038	0.119	1
SNRPB2	0.148401	-0.367911	0.038	0.119	1
MIR646HG	0.148401	-0.296243	0.038	0.119	1
TUBA1B	0.148499	0.763742	0.231	0.119	1
SBF2	0.148884	-0.345326	0.365	0.548	1
RPL22	0.150566	0.784285	0.135	0.048	1
BROX	0.150566	0.669983	0.135	0.048	1
RRAS	0.150566	0.766861	0.135	0.048	1
AC007319.1	0.150583	0.348453	0.212	0.095	1
TNFRSF19	0.152812	0.474284	0.173	0.071	1
DZIP3	0.15315	-0.477436	0.038	0.119	1
GNB4	0.15315	-0.455588	0.038	0.119	1
MRPL1	0.15315	-0.539608	0.038	0.119	1
MAPK14	0.15315	-0.427357	0.038	0.119	1
MMUT	0.15315	-0.316322	0.038	0.119	1
ZNF398	0.15315	-0.386504	0.038	0.119	1
ZBTB10	0.15315	-0.355558	0.038	0.119	1
PLGRKT	0.15315	-0.601737	0.038	0.119	1
AKR1C1	0.15315	-0.263288	0.038	0.119	1
CWF19L1	0.15315	-0.263259	0.038	0.119	1
NR1H3	0.15315	-0.52176	0.038	0.119	1
ZNF263	0.15315	-0.413715	0.038	0.119	1
CPPED1	0.15315	-0.506464	0.038	0.119	1
PLCG1	0.15315	-0.50008	0.038	0.119	1
NEAT1	0.153556	0.507402	0.885	0.881	1
BMERB1	0.154536	-0.995563	0.077	0.167	1
MPHOSPH9	0.154768	-0.253911	0.115	0.238	1
NRXN1	0.154841	0.879361	0.135	0.048	1
ADGRA3	0.154841	-0.57637	0.058	0.143	1
PRRC2A	0.154841	-0.8796	0.058	0.143	1
ZFHX3	0.15549	0.640026	0.615	0.571	1
FLVCR2	0.155994	-0.328921	0.154	0.286	1
RNF145	0.156459	1.32873	0.212	0.119	1
AC026316.5	0.157919	-0.379071	0.135	0.262	1
NRBP1	0.158013	-0.293516	0.038	0.119	1
MCEE	0.158013	-0.311436	0.038	0.119	1
LNPK	0.158013	-0.263326	0.038	0.119	1
RPA3	0.158013	-0.513483	0.038	0.119	1
KLHL7	0.158013	-0.263269	0.038	0.119	1
E2F5	0.158013	-0.470621	0.038	0.119	1
CATSPER2	0.158013	-0.404871	0.038	0.119	1
SEPTIN11	0.158995	-0.639662	0.212	0.357	1
MAGI1	0.159117	-0.511843	0.154	0.286	1
SUMO1	0.159208	-0.705413	0.058	0.143	1
UQCRC1	0.159208	0.413044	0.135	0.048	1
HECW1	0.159208	-1.18223	0.058	0.143	1
NRP1	0.159208	-0.638129	0.058	0.143	1
ZBED5	0.159208	0.62922	0.135	0.048	1
FAM155A	0.159208	0.929351	0.135	0.048	1
TOB2	0.159208	0.61276	0.135	0.048	1
GJA4	0.159208	0.809384	0.135	0.048	1
TBL1XR1	0.159208	-0.573735	0.404	0.571	1
CACNB2	0.159736	0.947474	0.192	0.095	1
PDGFRB	0.160012	1.16647	0.385	0.31	1
IMMP2L	0.16012	-0.256409	0.5	0.714	1
MOB3B	0.160304	-0.429026	0.173	0.31	1
ABLIM1	0.161338	-0.308821	0.269	0.452	1
GPATCH8	0.161389	-0.284736	0.269	0.429	1
AK5	0.161442	-0.800014	0.096	0.19	1
NOTCH3	0.161655	0.831717	0.231	0.119	1
ERBIN	0.16233	-0.302486	0.25	0.405	1
CUL1	0.162534	-0.388807	0.231	0.381	1
NR2F2-AS1	0.162858	-0.569513	0.462	0.643	1
GRHPR	0.162992	-0.30733	0.038	0.119	1
RPL30	0.163667	-0.932942	0.058	0.143	1
CDH23	0.163667	-0.770418	0.058	0.143	1
FAM149B1	0.163667	-0.579368	0.058	0.143	1
PARP11	0.163667	-0.426534	0.058	0.143	1
CYBA	0.163667	-0.81663	0.058	0.143	1
ERGIC3	0.163667	-0.538482	0.058	0.143	1
AP1B1	0.163667	-0.591349	0.058	0.143	1
EIF3L	0.163667	-0.632562	0.058	0.143	1
BRWD3	0.163667	-0.591867	0.058	0.143	1
BDP1	0.164602	-0.723617	0.115	0.214	1
MDM2	0.166234	-0.251514	0.135	0.262	1
ITGB5	0.16672	1.32485	0.154	0.071	1
GRB10	0.167935	1.38152	0.231	0.143	1
SNTB2	0.168089	0.408888	0.038	0.119	1
RALBP1	0.168089	0.429063	0.038	0.119	1
GSN	0.168174	-0.347035	0.25	0.429	1
SYNGAP1	0.16822	-0.555447	0.058	0.143	1
PTGR1	0.16822	-0.603693	0.058	0.143	1
HNRNPUL1	0.16822	-0.588316	0.058	0.143	1
EDA	0.16822	-0.492976	0.058	0.143	1
RPL18	0.168551	0.436174	0.231	0.119	1
GTDC1	0.16877	-0.320422	0.154	0.286	1
DYNC1H1	0.168808	0.994734	0.288	0.19	1
RALGAPA1	0.169504	-0.529829	0.385	0.571	1
LTBP2	0.169649	-0.300517	0.135	0.262	1
SETBP1	0.169649	-0.276897	0.135	0.262	1
ANK2	0.170251	0.774245	0.25	0.143	1
GOLIM4	0.170938	0.944021	0.154	0.071	1
PRORP	0.170938	-0.754901	0.077	0.167	1
IGFBP5	0.170961	0.978159	0.192	0.095	1
ARPC2	0.170961	0.829982	0.192	0.095	1
SLC12A7	0.170961	1.01781	0.192	0.095	1
KPNA4	0.171943	0.73491	0.25	0.143	1
FGF1	0.17197	-0.737695	0.115	0.214	1
MFSD8	0.172861	-0.429705	0.058	0.143	1
PEX14	0.172867	-0.428569	0.058	0.143	1
WDTC1	0.172867	-0.358794	0.058	0.143	1
RPN1	0.172867	-0.660191	0.058	0.143	1
KLF3-AS1	0.172867	-0.562846	0.058	0.143	1
TMEM181	0.172867	-0.305728	0.058	0.143	1
RADIL	0.172867	-0.448277	0.058	0.143	1
CNTN1	0.172867	0.848233	0.135	0.048	1
AC010201.3	0.172867	-0.5385	0.058	0.143	1
HOMER2	0.172867	-0.46494	0.058	0.143	1
GART	0.172867	-0.420423	0.058	0.143	1
DIP2A	0.172867	-0.415876	0.058	0.143	1
ACYP2	0.173277	-0.392775	0.25	0.381	1
RNF115	0.17348	-0.5452	0.173	0.286	1
NUAK1	0.17487	1.10045	0.231	0.143	1
TRIQK	0.175236	0.957991	0.154	0.071	1
ATP5F1E	0.175468	0.902943	0.308	0.19	1
ADARB2	0.176705	0.348219	0.173	0.071	1
ARNT	0.177609	-0.329111	0.058	0.143	1
ZC3H6	0.177609	-0.426006	0.058	0.143	1
SAP130	0.177609	-0.420508	0.058	0.143	1
RNF168	0.177609	-0.364001	0.058	0.143	1
FZD6	0.177609	-0.512295	0.058	0.143	1
CHFR	0.177609	-0.329935	0.058	0.143	1
RBX1	0.178762	0.842612	0.192	0.095	1
LAPTM4A	0.179613	-0.622214	0.077	0.167	1
UNKL	0.179613	0.88817	0.154	0.071	1
ASTN2	0.180612	-0.57515	0.154	0.262	1
LRIG1	0.181262	-0.563574	0.096	0.19	1
RUSC2	0.181262	-0.534495	0.096	0.19	1
MGMT	0.181262	-0.51744	0.096	0.19	1
KIDINS220	0.181828	-0.355726	0.212	0.333	1
MLH1	0.182447	-0.397623	0.058	0.143	1
TBC1D19	0.182447	-0.282824	0.058	0.143	1
PAFAH1B2	0.182447	-0.285543	0.058	0.143	1
GSE1	0.182447	-0.572967	0.058	0.143	1
ACSS2	0.182447	-0.294862	0.058	0.143	1
BICD1	0.182758	-0.396773	0.173	0.31	1
MT2A	0.183095	1.18944	0.327	0.214	1
TLN2	0.183838	0.317402	0.135	0.262	1
PDCD6	0.184071	-0.542782	0.077	0.167	1
DBNDD2	0.184071	1.09066	0.154	0.071	1
RNGTT	0.185451	1.14312	0.212	0.119	1
ENDOD1	0.185451	0.774659	0.212	0.119	1
PEBP1	0.186289	0.602455	0.327	0.214	1
GRINA	0.186833	0.684975	0.192	0.095	1
AC007364.1	0.187383	-0.336661	0.058	0.143	1
CIR1	0.187383	-0.2703	0.058	0.143	1
MED28	0.187383	-0.338006	0.058	0.143	1
ZC2HC1A	0.187383	-0.343796	0.058	0.143	1
ZFAND4	0.187383	-0.35469	0.058	0.143	1
LRFN5	0.187383	-0.310365	0.058	0.143	1
WIPI1	0.187383	-0.390154	0.058	0.143	1
ZNF536	0.187383	-0.409768	0.058	0.143	1
ZNF337	0.187383	-0.435776	0.058	0.143	1
EIF4EBP2	0.188606	0.85335	0.154	0.071	1
LARP1B	0.188611	-0.523533	0.077	0.167	1
ATP5MF	0.188611	1.06484	0.154	0.071	1
ISYNA1	0.188611	1.15546	0.154	0.071	1
PUM1	0.188705	-0.519381	0.269	0.405	1
TAB2	0.189523	0.250935	0.212	0.357	1
HSPB11	0.189677	-0.415623	0.096	0.19	1
TASOR2	0.189677	-0.632949	0.096	0.19	1
FKBP5	0.190453	-0.841923	0.442	0.524	1
DOCK4	0.190579	-0.711526	0.135	0.238	1
AC104806.2	0.191462	-0.579961	0.115	0.214	1
PSPC1	0.19173	-0.636148	0.192	0.31	1
GOLGA4	0.191773	-0.318478	0.25	0.405	1
GRIA4	0.192416	-0.40679	0.058	0.143	1
PSMB3	0.192416	-0.318218	0.058	0.143	1
NT5C2	0.192799	-0.296583	0.212	0.357	1
GMPS	0.193232	-0.484636	0.077	0.167	1
MTMR9	0.193232	-0.287743	0.077	0.167	1
PDE7A	0.193991	-0.444094	0.096	0.19	1
PHLDA1	0.193991	-0.517239	0.096	0.19	1
PER1	0.193991	-0.396416	0.096	0.19	1
BCAT2	0.193991	-0.696998	0.096	0.19	1
MBD2	0.19729	0.763438	0.212	0.119	1
WDSUB1	0.197937	-0.411186	0.077	0.167	1
CASP8AP2	0.197937	-0.347598	0.077	0.167	1
UHRF2	0.197937	-0.278944	0.077	0.167	1
TNFRSF1A	0.197937	-0.328618	0.077	0.167	1
ULK1	0.197937	0.604943	0.154	0.071	1
COL13A1	0.198376	-0.559816	0.096	0.19	1
CSNK1E	0.198376	-0.533765	0.096	0.19	1
STAT5B	0.198496	1.05532	0.25	0.167	1
RABAC1	0.199433	0.627122	0.192	0.095	1
LATS1	0.199704	-0.551299	0.115	0.214	1
WASL	0.199704	-0.441082	0.115	0.214	1
UBE2G1	0.199704	-0.462313	0.115	0.214	1
UST	0.200608	0.699932	0.462	0.381	1
EWSR1	0.200829	0.981496	0.231	0.143	1
CNOT10	0.202724	-0.314073	0.077	0.167	1
PPIP5K2	0.202724	-0.365001	0.077	0.167	1
SLC13A4	0.202724	-0.314664	0.077	0.167	1
DPY19L4	0.202724	-0.285068	0.077	0.167	1
SFMBT2	0.202724	-0.520717	0.077	0.167	1
ZSWIM8	0.202724	0.432413	0.154	0.071	1
ANO6	0.202724	-0.289171	0.077	0.167	1
PWP1	0.202724	-0.2537	0.077	0.167	1
KCNE4	0.202834	1.12447	0.173	0.095	1
PTPN21	0.202834	-0.692677	0.096	0.19	1
FCHO2	0.204589	1.00315	0.308	0.238	1
LRP1B	0.20602	1.40005	0.25	0.167	1
INVS	0.206395	-0.273344	0.135	0.238	1
SORBS1	0.206713	-0.379484	0.442	0.595	1
RCAN2	0.207596	-0.336087	0.077	0.167	1
SPIRE1	0.207596	-0.3678	0.077	0.167	1
ZNF559	0.207596	0.726296	0.154	0.071	1
JAG1	0.208171	0.397209	0.192	0.095	1
ATXN7L1	0.208198	-0.493492	0.115	0.214	1
DNAJC7	0.208198	-0.459238	0.115	0.214	1
TBL1X	0.208198	-0.381187	0.115	0.214	1
DAAM2	0.208738	1.31119	0.231	0.143	1
BRI3	0.209673	0.681188	0.212	0.119	1
RYBP	0.211568	1.0332	0.115	0.048	1
WIPI2	0.211568	1.09242	0.115	0.048	1
CCND2	0.211568	1.18707	0.115	0.048	1
KLHL36	0.211568	1.02285	0.115	0.048	1
SUMF1	0.212541	-0.556386	0.115	0.214	1
GOLGB1	0.212541	-0.448788	0.115	0.214	1
SLC22A3	0.212541	-0.532762	0.115	0.214	1
RNF169	0.212541	-0.401649	0.115	0.214	1
MAML1	0.212551	-0.28075	0.077	0.167	1
SNX3	0.212551	-0.277561	0.077	0.167	1
DCAF10	0.212551	-0.28384	0.077	0.167	1
ATP2B1	0.212551	0.815062	0.154	0.071	1
WBP4	0.212551	0.636589	0.154	0.071	1
TMEM165	0.212626	-0.362806	0.173	0.286	1
PARK7	0.213545	0.626355	0.058	0.143	1
SH3RF1	0.214652	-0.437645	0.135	0.238	1
CUX1	0.214864	-0.568676	0.308	0.452	1
ATP8B1	0.215056	0.626394	0.154	0.071	1
ATP1A2	0.215879	0.376286	0.712	0.738	1
RYK	0.216478	-0.528991	0.173	0.286	1
TRIB2	0.216643	-0.436558	0.096	0.19	1
EFHC1	0.216643	-0.268967	0.096	0.19	1
RING1	0.21737	0.97492	0.115	0.048	1
DLGAP2	0.21737	1.15102	0.115	0.048	1
PRPF18	0.21737	0.965268	0.115	0.048	1
TOLLIP	0.21737	0.936922	0.115	0.048	1
CSKMT	0.21737	0.965948	0.115	0.048	1
MYO5A	0.21737	0.807575	0.115	0.048	1
PSAP	0.217549	0.716495	0.327	0.238	1
RACK1	0.217592	0.667774	0.154	0.071	1
RANBP9	0.218868	-0.515208	0.135	0.238	1
EVI5	0.219615	-0.252345	0.212	0.333	1
RAD51B	0.22038	-0.409466	0.173	0.286	1
HSP90AB1	0.220512	0.51943	0.327	0.214	1
TMSB10	0.220639	0.99849	0.288	0.19	1
OIP5-AS1	0.221157	0.762323	0.365	0.286	1
COL5A2	0.221393	-0.319461	0.096	0.19	1
ARID5B	0.221393	-0.282378	0.096	0.19	1
CALM3	0.221393	1.12488	0.173	0.095	1
LINC02208	0.222718	0.677383	0.154	0.071	1
CARMIL1	0.222718	0.754627	0.154	0.071	1
DGKB	0.222718	0.774061	0.154	0.071	1
CTNNA2	0.223286	0.962177	0.115	0.048	1
DAP	0.223286	0.679658	0.115	0.048	1
CCNC	0.223286	0.811891	0.115	0.048	1
ARPC1B	0.223286	1.21046	0.115	0.048	1
ASS1	0.223286	0.746718	0.115	0.048	1
CDK2AP1	0.223286	0.931992	0.115	0.048	1
NDFIP2	0.223286	1.13011	0.115	0.048	1
PAGR1	0.223286	0.849962	0.115	0.048	1
SEPTIN2	0.224461	-0.332921	0.192	0.31	1
NAP1L4	0.224461	-0.33039	0.192	0.31	1
NDUFB11	0.225964	0.891803	0.192	0.119	1
SYTL4	0.226747	-0.371017	0.154	0.262	1
DSTN	0.227051	0.754063	0.308	0.214	1
PPP2R2B	0.22793	0.673317	0.154	0.071	1
DYNC1I1	0.22793	0.571706	0.154	0.071	1
ELOB	0.22793	0.499815	0.154	0.071	1
GNAS	0.228111	0.575439	0.404	0.333	1
MT-ND2	0.228394	0.835337	0.327	0.238	1
AKAP13	0.228887	-0.284435	0.346	0.476	1
SH3D19	0.229158	-0.525065	0.404	0.571	1
HADHA	0.229316	0.747402	0.115	0.048	1
ZDBF2	0.229316	0.76723	0.115	0.048	1
IQCJ-SCHIP1	0.229316	0.768969	0.115	0.048	1
SLC24A2	0.229316	0.730341	0.115	0.048	1
RORA-AS1	0.229316	0.666399	0.115	0.048	1
RIOK3	0.229316	0.885048	0.115	0.048	1
PEG3	0.229316	0.820865	0.115	0.048	1
KIF1B	0.229815	0.888168	0.25	0.167	1
ZFPM2	0.23057	-0.321885	0.115	0.214	1
ABCA9	0.23135	-0.344418	0.442	0.619	1
VPS53	0.231873	-0.27672	0.135	0.238	1
XRCC5	0.232248	-0.337319	0.192	0.31	1
VIM	0.233968	0.930813	0.25	0.167	1
AP3B1	0.235189	-0.38106	0.154	0.262	1
PRKAG2	0.235318	-0.424934	0.308	0.476	1
TAGLN2	0.235461	0.826119	0.115	0.048	1
MARCH1	0.235461	0.747722	0.115	0.048	1
MRPL22	0.235461	0.484859	0.115	0.048	1
SMOC2	0.235461	0.986435	0.115	0.048	1
PTAR1	0.235461	0.670108	0.115	0.048	1
KCTD1	0.235461	0.641299	0.115	0.048	1
CCDC102B	0.235461	0.662686	0.115	0.048	1
LDLR	0.235461	0.741021	0.115	0.048	1
MTMR3	0.23609	-0.342287	0.096	0.19	1
CYTH3	0.237302	0.96853	0.308	0.238	1
GAB1	0.238091	-0.635426	0.288	0.405	1
GRK5	0.238767	0.333546	0.423	0.333	1
ACTB	0.239403	0.317105	0.481	0.405	1
ARFGEF1	0.239618	0.531442	0.327	0.238	1
PPP3R1	0.239982	0.927844	0.192	0.119	1
FAXDC2	0.239982	-0.302497	0.115	0.214	1
RSPRY1	0.239982	-0.330459	0.115	0.214	1
RPS21	0.239982	-0.475519	0.115	0.214	1
IQSEC1	0.240224	-0.316112	0.192	0.31	1
BGN	0.240612	1.07433	0.269	0.19	1
DMD	0.240759	-0.389786	0.288	0.429	1
VWA8	0.240843	-0.315593	0.135	0.238	1
EFHD1	0.241139	0.724327	0.173	0.095	1
AC083870.1	0.241139	0.836925	0.173	0.095	1
RPL8	0.241139	0.88731	0.173	0.095	1
MAP1A	0.241139	0.670236	0.173	0.095	1
HLA-B	0.241721	0.630167	0.115	0.048	1
DSCAML1	0.241721	0.579342	0.115	0.048	1
AFMID	0.241721	0.808814	0.115	0.048	1
AFF3	0.242458	-0.513877	0.212	0.333	1
STXBP1	0.242742	-0.421839	0.173	0.286	1
AAK1	0.244284	0.592887	0.288	0.19	1
AFG3L2	0.244895	-0.657912	0.058	0.119	1
CFH	0.246805	-0.308355	0.288	0.452	1
ITGB1	0.247123	0.580878	0.231	0.143	1
SREBF2	0.247123	0.759046	0.231	0.143	1
ITPK1	0.248098	0.549834	0.115	0.048	1
ABCC9	0.249661	1.18097	0.192	0.119	1
BTG1	0.249661	1.24123	0.192	0.119	1
PLXNC1	0.25133	-0.632647	0.058	0.119	1
PDCD6IP	0.251464	0.291851	0.096	0.19	1
PRXL2A	0.251675	0.687723	0.231	0.143	1
PITPNC1	0.253422	-0.3093	0.173	0.286	1
THRA	0.254592	0.43712	0.115	0.048	1
TMEM230	0.254592	0.392999	0.115	0.048	1
ATL3	0.255292	0.522386	0.077	0.167	1
PKD1	0.25674	0.666431	0.173	0.095	1
SIK2	0.258368	0.297286	0.442	0.31	1
ACTA2	0.261203	0.420635	0.115	0.048	1
ARPC5	0.261605	0.864526	0.135	0.071	1
CASC3	0.262093	0.61898	0.173	0.095	1
ZNF407	0.262093	0.533035	0.173	0.095	1
MAST4	0.262195	0.517172	0.269	0.167	1
HES4	0.264503	0.766904	0.25	0.167	1
SPAST	0.264552	-0.78871	0.058	0.119	1
PAX8-AS1	0.264552	-0.7499	0.058	0.119	1
ANXA7	0.264552	-0.596849	0.058	0.119	1
TMEM192	0.264636	-0.692067	0.077	0.143	1
PAG1	0.266152	0.680092	0.269	0.19	1
TMSB4X	0.267104	-0.277355	0.25	0.357	1
EZR	0.267522	0.603833	0.173	0.095	1
TSPYL1	0.267691	1.24942	0.135	0.071	1
SPATA13	0.267931	0.542751	0.115	0.048	1
ILF3-DT	0.267931	0.290354	0.115	0.048	1
KCNIP4	0.269208	1.09544	0.212	0.143	1
CAPZA1	0.269829	0.828246	0.192	0.119	1
SF3B1	0.269829	0.834959	0.192	0.119	1
GGT5	0.270575	-0.973358	0.212	0.31	1
EBF1	0.270632	0.852318	0.519	0.476	1
CEBPZOS	0.27134	-0.793714	0.058	0.119	1
ATXN1	0.271891	-0.304328	0.288	0.405	1
ZNF292	0.271979	-0.688194	0.269	0.381	1
EMC2	0.273029	0.320007	0.096	0.19	1
GGT7	0.273029	0.349414	0.096	0.19	1
DIPK2A	0.273874	1.17222	0.135	0.071	1
MAGI2	0.274655	-0.401553	0.519	0.643	1
SRGAP2C	0.274899	-0.553402	0.135	0.214	1
SORT1	0.274915	0.851109	0.288	0.214	1
KALRN	0.275296	0.875514	0.327	0.262	1
FOXP1	0.275617	-0.306596	0.577	0.762	1
YWHAZ	0.275921	1.06904	0.231	0.167	1
PCID2	0.277002	-0.850144	0.077	0.143	1
SLC16A4	0.278246	-0.754289	0.058	0.119	1
XPC	0.278246	-0.433437	0.058	0.119	1
MAML2	0.278341	0.511665	0.558	0.476	1
RPL17	0.278499	0.987033	0.269	0.214	1
NR2F1	0.279745	-0.42727	0.404	0.548	1
GPC6	0.280154	1.39733	0.135	0.071	1
PLCL1	0.280214	0.595466	0.231	0.143	1
EEF1A1	0.281071	0.782386	0.365	0.286	1
EXTL3	0.282137	-0.914398	0.096	0.167	1
LRRC8C	0.28333	-0.622917	0.077	0.143	1
UBE2G2	0.28333	-1.22364	0.077	0.143	1
PRKD1	0.284178	-0.5017	0.192	0.286	1
SERINC1	0.284218	0.893411	0.212	0.143	1
SMC5	0.284218	-0.305691	0.135	0.238	1
NAPB	0.284273	0.489218	0.096	0.19	1
SOX5	0.284399	0.453207	0.442	0.357	1
CACNA1C	0.285151	0.694671	0.365	0.286	1
COPS9	0.285271	-0.680797	0.058	0.119	1
RPS10	0.285271	-0.3099	0.058	0.119	1
ALOX12-AS1	0.285271	-0.630493	0.058	0.119	1
RAB34	0.285271	-0.398317	0.058	0.119	1
RABGEF1	0.286427	-0.359849	0.231	0.333	1
MARCH5	0.28653	0.968455	0.135	0.071	1
ZNF814	0.28653	0.790738	0.135	0.071	1
REEP3	0.287928	-0.535614	0.173	0.262	1
L3MBTL4	0.288048	-0.561805	0.096	0.167	1
UBE2D3	0.288216	0.82594	0.288	0.214	1
RAB1A	0.288219	0.520564	0.288	0.214	1
ARID2	0.289271	0.879365	0.346	0.31	1
FMNL2	0.289294	-0.305148	0.385	0.524	1
TXNDC16	0.289755	-0.373691	0.077	0.143	1
MOK	0.289755	-0.745767	0.077	0.143	1
PAK2	0.29001	0.317647	0.173	0.095	1
MT-ND4L	0.29001	0.338733	0.173	0.095	1
SPRY4-AS1	0.29051	-0.796018	0.135	0.214	1
RAB11FIP2	0.291087	0.282821	0.115	0.214	1
COL3A1	0.291087	0.296159	0.115	0.214	1
NMNAT1	0.292414	-0.430792	0.058	0.119	1
ZBTB40	0.292414	-0.476847	0.058	0.119	1
ASAP3	0.292414	-0.397214	0.058	0.119	1
SAP30L-AS1	0.292414	-0.365179	0.058	0.119	1
AC019205.1	0.292414	-0.476877	0.058	0.119	1
NUP205	0.292414	-0.679627	0.058	0.119	1
PIGN	0.292414	-0.38458	0.058	0.119	1
ZNF700	0.292414	-0.352397	0.058	0.119	1
FHL1	0.292414	-0.311824	0.058	0.119	1
PIK3CD	0.293004	0.776966	0.135	0.071	1
PTPN14	0.293004	0.858624	0.135	0.071	1
CD302	0.293004	1.11191	0.135	0.071	1
MAP3K4	0.293004	0.887861	0.135	0.071	1
MTFR1	0.293004	0.651852	0.135	0.071	1
DDX21	0.293004	0.703575	0.135	0.071	1
MSRB3	0.29378	-0.498352	0.115	0.19	1
IFT80	0.294041	-0.2932	0.096	0.167	1
TLE4	0.294041	-0.419064	0.096	0.167	1
PMEPA1	0.294533	0.868024	0.212	0.143	1
HIP1	0.295239	0.751305	0.308	0.238	1
TESK2	0.296278	-0.584963	0.077	0.143	1
POU6F2	0.296278	-0.5717	0.077	0.143	1
ACAT1	0.296278	-0.498205	0.077	0.143	1
RASSF2	0.296278	-0.262908	0.077	0.143	1
CHN1	0.296573	0.330996	0.115	0.214	1
FBLN1	0.296599	-0.805438	0.481	0.571	1
IRAK3	0.297069	1.25341	0.154	0.095	1
RPS2	0.299463	-0.579714	0.115	0.19	1
TTC33	0.299576	0.583241	0.135	0.071	1
COQ8A	0.299677	-0.365117	0.058	0.119	1
ORMDL1	0.299677	-0.26953	0.058	0.119	1
UHRF1BP1	0.299677	-0.377888	0.058	0.119	1
POR	0.299677	-0.45425	0.058	0.119	1
RRAGA	0.299677	-0.425267	0.058	0.119	1
UNC13B	0.299677	-0.365107	0.058	0.119	1
CERCAM	0.299677	-0.453465	0.058	0.119	1
MRE11	0.299677	-0.324674	0.058	0.119	1
TRIOBP	0.299677	-0.365898	0.058	0.119	1
PAMR1	0.300117	-0.776025	0.096	0.167	1
TRIO	0.301665	-0.285252	0.385	0.548	1
PLS3	0.301719	0.480984	0.173	0.095	1
RHOB	0.302128	0.734448	0.192	0.119	1
RPL14	0.302128	0.553613	0.192	0.119	1
ARNTL	0.302128	0.545306	0.192	0.119	1
MYO6	0.30284	0.982033	0.365	0.333	1
ZNF706	0.303187	1.49864	0.154	0.095	1
SMARCA1	0.303187	1.13853	0.154	0.095	1
PPP2CA	0.305219	-0.540881	0.115	0.19	1
RPS3	0.305219	-0.490259	0.115	0.19	1
PHF10	0.305617	-0.56371	0.154	0.238	1
DENND1A	0.306148	-0.385927	0.269	0.405	1
P2RY14	0.306245	0.825421	0.135	0.071	1
CCNL1	0.306245	0.472255	0.135	0.071	1
NDUFA3	0.306245	0.679891	0.135	0.071	1
GRK3	0.306245	0.51543	0.135	0.071	1
ST6GAL1	0.306277	-0.44097	0.096	0.167	1
FBXO21	0.306277	-0.480156	0.096	0.167	1
AIDA	0.307059	-0.370106	0.058	0.119	1
AC092839.1	0.307059	-0.326977	0.058	0.119	1
BMS1	0.307059	-0.320897	0.058	0.119	1
MARK2	0.307059	-0.476036	0.058	0.119	1
NSF	0.307059	-0.417848	0.058	0.119	1
MEF2B	0.307059	-0.378952	0.058	0.119	1
NHS	0.307059	-0.643286	0.058	0.119	1
RPS4X	0.307059	-0.428992	0.058	0.119	1
DMXL1	0.309192	0.870857	0.25	0.19	1
THSD7B	0.309388	1.22496	0.154	0.095	1
CCDC3	0.309388	1.22471	0.154	0.095	1
USP11	0.309388	1.23143	0.154	0.095	1
PDLIM5	0.309616	-0.318923	0.077	0.143	1
PTPRN2	0.309616	-0.418053	0.077	0.143	1
NSUN6	0.309616	-0.385924	0.077	0.143	1
ALG13	0.310754	0.761718	0.231	0.167	1
PHF14	0.311047	-0.258446	0.115	0.19	1
FOCAD	0.311047	-0.620184	0.115	0.19	1
MIER1	0.311343	-0.321096	0.212	0.31	1
SMIM14	0.312236	-0.397881	0.135	0.214	1
RPL34	0.312236	-0.63237	0.135	0.214	1
NUP153	0.312236	-0.433576	0.135	0.214	1
LGR4	0.31252	-0.524914	0.096	0.167	1
PTPN11	0.31252	-0.472657	0.096	0.167	1
VAMP5	0.313011	0.594364	0.135	0.071	1
CDK8	0.313011	0.551631	0.135	0.071	1
HDHD2	0.313011	0.590257	0.135	0.071	1
TAF12	0.314561	-0.270241	0.058	0.119	1
FAM49B	0.314561	-0.286302	0.058	0.119	1
SLC11A2	0.314561	-0.400395	0.058	0.119	1
MRPL42	0.314561	-0.40917	0.058	0.119	1
CALM1	0.315554	1.03158	0.385	0.357	1
BMT2	0.315672	0.633148	0.154	0.095	1
CRIP2	0.315672	0.846996	0.154	0.095	1
CEBPB	0.315672	1.05413	0.154	0.095	1
TRMT11	0.315909	0.693827	0.135	0.238	1
VAMP2	0.315957	0.832978	0.231	0.167	1
ARHGEF7	0.31611	0.642175	0.288	0.214	1
NOL10	0.316431	-0.250181	0.077	0.143	1
FRZB	0.316431	-0.269555	0.077	0.143	1
STMP1	0.316431	-0.458847	0.077	0.143	1
AVEN	0.316431	-0.372669	0.077	0.143	1
RBPJ	0.316948	-0.449934	0.115	0.19	1
DDX5	0.317681	0.611367	0.442	0.381	1
SUCLG2-AS1	0.318845	-0.390343	0.096	0.167	1
ST3GAL1	0.318845	-0.271897	0.096	0.167	1
CEP290	0.318845	-0.524958	0.096	0.167	1
RPL23	0.318845	-0.371656	0.096	0.167	1
HLCS	0.318845	-0.493051	0.096	0.167	1
ATP6V1E1	0.319876	0.431903	0.135	0.071	1
SNTB1	0.321217	0.740978	0.231	0.167	1
HIF1A	0.321409	0.855404	0.212	0.143	1
PTPRG	0.321425	0.459654	0.596	0.595	1
UTRN	0.32148	1.02804	0.519	0.548	1
MAP3K5	0.32157	0.315332	0.231	0.143	1
ZNF626	0.32204	0.804467	0.154	0.095	1
WDR78	0.322182	-0.263353	0.058	0.119	1
ATP2C1	0.322182	0.27259	0.058	0.119	1
UFSP2	0.322182	-0.306439	0.058	0.119	1
FAM20C	0.322182	0.29384	0.058	0.119	1
CRLS1	0.322182	0.540779	0.058	0.119	1
DPYSL3	0.323345	-0.279727	0.077	0.143	1
RERG	0.323345	-0.310326	0.077	0.143	1
PRR5	0.323345	-0.288824	0.077	0.143	1
MECP2	0.32349	-0.499546	0.135	0.214	1
EPHX1	0.325255	-0.255344	0.096	0.167	1
ARPC1A	0.325255	-0.2921	0.096	0.167	1
DLEU1	0.325255	-0.253622	0.096	0.167	1
NDUFA1	0.325255	-0.359135	0.096	0.167	1
TRIP12	0.325789	-0.356891	0.212	0.31	1
PON2	0.325937	1.37189	0.173	0.119	1
BAG4	0.326838	0.394667	0.135	0.071	1
NOL8	0.326838	0.615446	0.135	0.071	1
FKBP3	0.326838	0.280882	0.135	0.071	1
CNTN4	0.327007	0.396797	0.231	0.143	1
TTBK2	0.327007	-0.386223	0.154	0.238	1
KDM4C	0.328241	-0.501978	0.173	0.262	1
PPM1L	0.32897	-0.502791	0.115	0.19	1
LENG8	0.329215	-0.361565	0.135	0.214	1
HSPG2	0.329923	-0.369082	0.058	0.119	1
PARP8	0.329923	0.669196	0.058	0.119	1
MTHFD1L	0.330356	-1.44902	0.077	0.143	1
N4BP2L1	0.330356	-0.336127	0.077	0.143	1
NRIP1	0.330435	0.840904	0.288	0.238	1
CAMSAP2	0.330699	-0.267614	0.212	0.31	1
RPS27A	0.330934	0.750922	0.192	0.119	1
ANKRD36C	0.331747	-0.330285	0.096	0.167	1
EXOC1	0.331747	-0.340394	0.096	0.167	1
TBC1D12	0.331747	-0.335826	0.096	0.167	1
RILPL1	0.331747	-0.422713	0.096	0.167	1
UBXN4	0.332594	0.387341	0.135	0.238	1
SPECC1	0.333892	0.443032	0.135	0.071	1
ARHGEF6	0.333898	0.404221	0.135	0.071	1
USP12	0.335006	-0.343533	0.135	0.214	1
RPL21	0.335006	-0.293236	0.135	0.214	1
NPIPB4	0.335019	-0.308682	0.096	0.167	1
MAP2	0.335025	0.802643	0.154	0.095	1
RB1	0.335054	0.267663	0.231	0.381	1
TAOK1	0.335658	-0.56272	0.212	0.31	1
IL4R	0.337464	-0.347935	0.077	0.143	1
RPN2	0.337464	-0.376051	0.077	0.143	1
IGBP1	0.337783	0.284562	0.058	0.119	1
EYA1	0.338058	-0.284865	0.154	0.238	1
FOSL2	0.338178	0.830596	0.173	0.119	1
CDK19	0.341284	-0.517358	0.115	0.19	1
PTMA	0.341384	0.788159	0.346	0.286	1
S100A11	0.341642	0.80109	0.154	0.095	1
CNBP	0.341642	0.823076	0.154	0.095	1
CLSTN2	0.341642	1.01097	0.154	0.095	1
MSC-AS1	0.341642	1.01553	0.154	0.095	1
CSTB	0.341642	0.772291	0.154	0.095	1
MT-ATP8	0.341642	0.714299	0.154	0.095	1
TMA7	0.342823	0.699679	0.231	0.167	1
CTDSPL	0.342827	0.836098	0.231	0.167	1
SSH1	0.344027	0.293057	0.135	0.238	1
SSH2	0.34482	0.317481	0.308	0.5	1
HEATR1	0.345762	0.256827	0.058	0.119	1
DOP1A	0.345762	0.295649	0.058	0.119	1
SEPTIN7	0.346068	-0.392419	0.269	0.381	1
AC019197.1	0.346919	0.599341	0.308	0.238	1
AKT3	0.347382	0.743818	0.519	0.571	1
TAOK3	0.34755	-0.509819	0.115	0.19	1
MAN2A1	0.34774	0.541024	0.404	0.357	1
NDUFC2	0.34831	0.26177	0.135	0.071	1
TSPAN4	0.348342	0.686267	0.154	0.095	1
RPS15A	0.348342	1.00259	0.154	0.095	1
MPRIP	0.348371	0.670418	0.231	0.167	1
AGFG1	0.349708	-0.487974	0.173	0.262	1
RAB7A	0.349837	0.54428	0.212	0.143	1
SHOC2	0.349837	0.367089	0.212	0.143	1
WDR20	0.349837	0.676898	0.212	0.143	1
WASHC2A	0.351974	0.316428	0.077	0.143	1
TSG101	0.351974	-0.311093	0.077	0.143	1
TMEM258	0.351974	-0.464564	0.077	0.143	1
KIAA1958	0.352768	-0.35839	0.135	0.214	1
PALMD	0.35386	0.279532	0.058	0.119	1
SMU1	0.35386	0.437857	0.058	0.119	1
SRC	0.35386	0.491647	0.058	0.119	1
SRRM1	0.353888	-0.310677	0.115	0.19	1
TENM4	0.353888	0.269524	0.115	0.19	1
SP100	0.354256	0.383094	0.231	0.381	1
ATRX	0.355031	-0.368491	0.269	0.357	1
C1D	0.355125	0.827496	0.154	0.095	1
RPS11	0.355217	0.38208	0.192	0.119	1
ZMYM2	0.357864	0.781712	0.365	0.357	1
[truncated: 1,016 more rows]

## Sheet: OPC_AD_logNorm_diffEx
gene	p_val	avg_log2FC	pct.1	pct.2	p_val_adj
MALAT1	5.55923e-223	-1.17039	0.998	1	1.7193e-218
SDC3	7.7462e-41	0.692599	0.503	0.269	2.39567e-36
NLGN1	7.51529e-40	0.417166	0.946	0.88	2.32425e-35
VCAN	1.0376e-35	0.608049	0.823	0.717	3.209e-31
DSCAM	1.83809e-35	0.401516	0.976	0.922	5.68465e-31
LRP1B	4.62243e-34	0.346854	0.957	0.925	1.42958e-29
FKBP5	8.60324e-34	0.719233	0.375	0.186	2.66072e-29
PARD3	6.84813e-33	0.59957	0.656	0.441	2.11792e-28
NRCAM	2.92847e-31	0.46566	0.857	0.735	9.05687e-27
GALNT13	5.59409e-28	0.562152	0.735	0.566	1.73009e-23
AC009041.2	1.29738e-27	-0.636142	0.61	0.72	4.0124e-23
MKLN1	3.83168e-27	0.490355	0.656	0.46	1.18502e-22
DGKG	9.13612e-27	0.478148	0.729	0.531	2.82553e-22
ZDHHC14	1.4224e-26	0.530154	0.65	0.459	4.39906e-22
ATRNL1	1.67532e-26	0.519725	0.786	0.654	5.18126e-22
HDAC4	6.00818e-26	0.4937	0.402	0.223	1.85815e-21
METTL7A	6.66436e-26	0.538346	0.271	0.126	2.06109e-21
LSAMP	3.53338e-25	0.332656	0.952	0.912	1.09277e-20
SLC38A2	4.18316e-25	0.531076	0.243	0.108	1.29373e-20
ZFPM2	8.30787e-25	0.49514	0.724	0.539	2.56938e-20
PITPNC1	4.56767e-24	0.567214	0.51	0.329	1.41264e-19
GFAP	1.30977e-23	0.669577	0.182	0.071	4.05073e-19
RBFOX1	4.03957e-23	-0.566308	0.558	0.669	1.24932e-18
RXRA	4.64404e-23	0.546031	0.203	0.084	1.43626e-18
ERBB4	7.70459e-23	0.391634	0.87	0.771	2.3828e-18
SOX8	1.02056e-22	0.492001	0.312	0.163	3.15629e-18
ADGRL3	2.73078e-22	0.325751	0.901	0.835	8.44548e-18
NCAM2	2.75004e-22	0.396547	0.851	0.769	8.50505e-18
VEGFA	5.9482e-22	0.811648	0.185	0.077	1.8396e-17
FBXO31	6.48836e-22	0.491442	0.186	0.075	2.00665e-17
MEGF11	1.93533e-21	0.448633	0.714	0.541	5.98539e-17
PHLDA1	1.61719e-20	0.511514	0.377	0.224	5.00147e-16
SOX5	4.19962e-20	0.374347	0.807	0.68	1.29882e-15
DCAKD	6.70134e-20	0.577153	0.248	0.124	2.07252e-15
GPNMB	6.85616e-20	0.677823	0.338	0.2	2.12041e-15
TAFA1	7.18933e-20	0.582213	0.434	0.28	2.22344e-15
CADM2	1.09588e-19	0.277688	0.941	0.893	3.38922e-15
BCL6	1.29466e-19	0.384363	0.324	0.178	4.00398e-15
HIF3A	1.97685e-19	0.402711	0.519	0.346	6.1138e-15
KIF19	2.25364e-19	0.421129	0.151	0.058	6.96983e-15
CSPG4	2.58435e-19	0.389753	0.341	0.194	7.99263e-15
PDE8B	3.25725e-19	0.452028	0.531	0.364	1.00737e-14
CSMD2	3.82093e-19	0.380658	0.564	0.378	1.1817e-14
FGF14	3.85253e-19	0.339936	0.887	0.819	1.19147e-14
ZBTB20	6.22831e-19	0.351549	0.83	0.698	1.92623e-14
BAALC	8.01255e-19	0.500344	0.384	0.235	2.47804e-14
HSPB1	1.23752e-18	0.456876	0.169	0.071	3.82727e-14
HAP1	2.83484e-18	0.395882	0.15	0.059	8.76732e-14
SPOCK1	6.70965e-18	0.383409	0.638	0.461	2.07509e-13
GSG1L	1.1003e-17	0.396589	0.347	0.207	3.40291e-13
NPAS3	1.38503e-17	0.3237	0.885	0.8	4.28349e-13
PTPRJ	1.6611e-17	0.452562	0.576	0.423	5.13729e-13
BRINP3	1.68899e-17	0.361624	0.745	0.603	5.22354e-13
HSPA1A	1.76189e-17	0.430069	0.128	0.046	5.449e-13
SGMS1	2.19875e-17	0.411109	0.539	0.372	6.80007e-13
PMP2	2.29916e-17	0.443465	0.233	0.119	7.11061e-13
CD82	2.5982e-17	0.446161	0.217	0.108	8.03545e-13
GRID2	3.72217e-17	0.322604	0.886	0.804	1.15116e-12
MAML2	4.55003e-17	0.371489	0.722	0.573	1.40719e-12
CALCRL	1.11362e-16	0.367823	0.404	0.252	3.44408e-12
NCOA1	1.97261e-16	0.420557	0.619	0.459	6.1007e-12
SPRED1	2.0109e-16	0.381259	0.437	0.287	6.21911e-12
TCF12	3.13932e-16	0.328613	0.691	0.537	9.70898e-12
PIEZO1	3.30538e-16	0.302342	0.113	0.04	1.02225e-11
CHST9	3.71316e-16	0.408411	0.335	0.202	1.14837e-11
MDGA2	4.06166e-16	0.307564	0.85	0.749	1.25615e-11
SLC2A13	4.63725e-16	0.363634	0.494	0.332	1.43416e-11
SLC35F1	6.39374e-16	0.348468	0.785	0.681	1.97739e-11
EGFR	7.7012e-16	0.420907	0.307	0.182	2.38175e-11
TCF4	7.74951e-16	0.365312	0.736	0.613	2.39669e-11
ARHGEF6	8.00733e-16	0.371771	0.225	0.117	2.47643e-11
CADM1	1.13644e-15	0.362491	0.647	0.482	3.51468e-11
ZMAT3	1.51909e-15	0.299542	0.356	0.218	4.69809e-11
KAT2B	1.5319e-15	0.33797	0.684	0.521	4.7377e-11
SAMD4A	1.64543e-15	0.405451	0.524	0.37	5.08883e-11
CD81	1.74653e-15	0.434915	0.564	0.412	5.40151e-11
MGLL	1.85458e-15	0.421113	0.301	0.179	5.73566e-11
CEBPD	1.95991e-15	0.443251	0.16	0.073	6.06141e-11
PHYHIPL	2.1341e-15	0.395293	0.503	0.354	6.60012e-11
RFX3	2.38039e-15	0.328424	0.449	0.3	7.36183e-11
SYT1	2.97334e-15	-0.78706	0.15	0.257	9.19563e-11
TLE5	3.05971e-15	0.347573	0.203	0.104	9.46276e-11
NOTCH2	3.0805e-15	0.312198	0.259	0.144	9.52707e-11
ZBTB16	4.1788e-15	0.384459	0.349	0.22	1.29238e-10
SLAIN1	4.63379e-15	0.393045	0.485	0.336	1.43309e-10
AKT3	5.93523e-15	0.330697	0.66	0.498	1.83559e-10
ATP13A4	6.65737e-15	0.349109	0.497	0.34	2.05893e-10
CNTN3	7.14611e-15	0.35528	0.406	0.267	2.21008e-10
MARCKSL1	7.28704e-15	0.372055	0.393	0.254	2.25366e-10
RAB31	1.01282e-14	0.307568	0.506	0.349	3.13236e-10
ASAP1	1.16734e-14	0.354317	0.653	0.485	3.61023e-10
PHF14	1.46601e-14	0.275308	0.43	0.284	4.53393e-10
CAPN2	1.59495e-14	0.25396	0.172	0.082	4.93269e-10
SORCS3	2.10028e-14	0.347933	0.537	0.377	6.49553e-10
KCND2	2.12643e-14	0.338288	0.824	0.73	6.57642e-10
PCBP2	2.2234e-14	0.272041	0.234	0.128	6.87631e-10
MEG3	2.22433e-14	-0.420117	0.692	0.72	6.87918e-10
CHST3	2.37264e-14	0.430857	0.164	0.079	7.33786e-10
CAMK2D	2.47697e-14	0.549756	0.396	0.265	7.66051e-10
PDE4B	2.62137e-14	0.338687	0.83	0.738	8.10712e-10
LRRTM4	3.06989e-14	0.255617	0.911	0.85	9.49424e-10
ROBO2	3.30512e-14	-0.711117	0.108	0.205	1.02218e-09
NRIP1	3.31904e-14	0.35734	0.242	0.135	1.02648e-09
UBA1	3.32408e-14	0.317132	0.206	0.107	1.02804e-09
PGAP1	3.59823e-14	0.391613	0.304	0.185	1.11283e-09
LINC00511	3.73618e-14	0.337891	0.674	0.521	1.15549e-09
TNFRSF1A	4.5957e-14	0.36379	0.123	0.051	1.42131e-09
KCNT2	5.26023e-14	0.27875	0.338	0.208	1.62683e-09
BGN	5.70054e-14	0.262829	0.116	0.046	1.76301e-09
RAB10	6.12448e-14	0.280497	0.348	0.217	1.89412e-09
NKAIN2	6.30439e-14	-0.731184	0.085	0.174	1.94976e-09
RTKN	7.88616e-14	0.348597	0.194	0.101	2.43895e-09
ZFAND3	8.58993e-14	0.296617	0.516	0.365	2.65661e-09
HTRA1	9.89251e-14	0.388399	0.604	0.457	3.05946e-09
SNTG1	1.07142e-13	0.328581	0.835	0.758	3.31358e-09
VAPA	1.10386e-13	0.284615	0.301	0.182	3.41392e-09
CSMD3	1.10476e-13	0.296197	0.821	0.718	3.4167e-09
NFKBIA	1.14853e-13	0.279559	0.115	0.046	3.55205e-09
MED13L	1.19645e-13	0.315982	0.534	0.378	3.70025e-09
AC124254.2	1.21033e-13	0.470658	0.252	0.149	3.74317e-09
TNKS	1.38985e-13	0.270474	0.596	0.438	4.2984e-09
SLC5A3	1.67222e-13	0.315412	0.147	0.068	5.17168e-09
FNDC3B	1.82436e-13	0.319094	0.289	0.174	5.6422e-09
NACC2	2.43186e-13	0.354897	0.224	0.125	7.52103e-09
PSAP	3.30921e-13	0.273636	0.536	0.376	1.02344e-08
STAT3	3.40928e-13	0.316449	0.202	0.109	1.05439e-08
UST	3.60058e-13	0.371789	0.419	0.29	1.11355e-08
KCNIP3	3.72488e-13	0.331511	0.184	0.095	1.15199e-08
ZNF148	3.77553e-13	0.315234	0.325	0.205	1.16766e-08
PDZD2	4.01803e-13	0.358585	0.821	0.724	1.24266e-08
MT-ND3	4.36479e-13	0.343906	0.351	0.227	1.3499e-08
TRPS1	4.47413e-13	0.3003	0.399	0.268	1.38371e-08
CNTN1	4.50033e-13	0.355649	0.744	0.636	1.39182e-08
LPP	5.54932e-13	0.31223	0.573	0.425	1.71624e-08
OLIG2	5.67102e-13	0.369001	0.447	0.313	1.75388e-08
CDH19	5.89158e-13	0.389907	0.14	0.065	1.82209e-08
GAD1	6.65224e-13	0.393983	0.286	0.176	2.05734e-08
TAFA5	6.69474e-13	0.294077	0.292	0.178	2.07048e-08
LIFR	7.17916e-13	0.332596	0.389	0.257	2.2203e-08
BCAR1	7.20296e-13	0.262725	0.125	0.054	2.22766e-08
ELL2	7.98387e-13	0.452784	0.184	0.097	2.46917e-08
GRM7	8.58395e-13	0.324958	0.774	0.648	2.65476e-08
KIAA1958	8.68975e-13	0.308326	0.333	0.212	2.68748e-08
SPECC1	8.93847e-13	0.283937	0.254	0.148	2.7644e-08
ITGB8	9.02069e-13	0.267206	0.375	0.244	2.78983e-08
MT-ND4	1.09242e-12	0.306227	0.381	0.255	3.37854e-08
EPC2	1.18667e-12	0.271447	0.303	0.187	3.67002e-08
MARCKS	1.2019e-12	0.328135	0.506	0.363	3.71711e-08
STK32B	1.21506e-12	0.338413	0.302	0.189	3.75781e-08
FGF12	1.22655e-12	0.394401	0.751	0.656	3.79336e-08
NFIB	1.29836e-12	0.282456	0.634	0.481	4.01544e-08
PLPP4	1.72716e-12	0.390552	0.401	0.276	5.34159e-08
NLGN4X	1.78562e-12	0.361155	0.617	0.475	5.52238e-08
SH3RF3	1.86299e-12	0.339274	0.179	0.093	5.76168e-08
EPN2	1.95279e-12	-0.298748	0.803	0.821	6.03939e-08
SEMA3E	2.21475e-12	0.330824	0.28	0.173	6.84956e-08
COBL	2.48228e-12	0.301079	0.537	0.388	7.67694e-08
MT2A	2.48997e-12	0.273716	0.399	0.268	7.70073e-08
ZMYM2	2.55656e-12	0.307589	0.397	0.269	7.90666e-08
ETV1	2.56808e-12	0.304311	0.341	0.224	7.94231e-08
LRRC7	2.60066e-12	0.28322	0.752	0.649	8.04307e-08
BEST3	3.10776e-12	0.387779	0.301	0.19	9.61137e-08
IL6ST	3.20821e-12	0.319423	0.295	0.186	9.92204e-08
FAM110B	4.11959e-12	0.304113	0.415	0.283	1.27406e-07
TMEM132C	5.34858e-12	0.293916	0.647	0.499	1.65415e-07
LRMDA	5.918e-12	0.427644	0.495	0.371	1.83026e-07
KHDRBS3	6.81894e-12	0.290678	0.632	0.484	2.10889e-07
SMOC1	7.75321e-12	0.352091	0.726	0.611	2.39783e-07
TRIM9	8.33063e-12	0.315314	0.606	0.463	2.57642e-07
SCD5	9.22122e-12	0.290838	0.787	0.687	2.85185e-07
SLC1A2	9.81731e-12	0.308342	0.63	0.487	3.0362e-07
BCR	1.17327e-11	0.305221	0.206	0.118	3.62857e-07
TSC22D1	1.19193e-11	0.258996	0.524	0.376	3.68628e-07
RNF150	1.23492e-11	0.305684	0.405	0.281	3.81922e-07
GRIK3	1.40211e-11	0.344891	0.245	0.148	4.33632e-07
SEM1	1.47698e-11	0.271327	0.244	0.147	4.56786e-07
AHCYL1	1.63111e-11	0.359459	0.225	0.132	5.04452e-07
MYRFL	1.76679e-11	0.333124	0.134	0.065	5.46415e-07
CDK14	1.92738e-11	0.293117	0.485	0.349	5.96079e-07
PPM1B	2.02243e-11	0.267095	0.374	0.253	6.25476e-07
MOG	2.0637e-11	-0.762714	0.072	0.144	6.38241e-07
GLUL	2.16463e-11	0.251556	0.197	0.11	6.69454e-07
PDE1A	2.51716e-11	-0.673492	0.043	0.106	7.78483e-07
CNTNAP2	2.83964e-11	-0.431263	0.362	0.457	8.78217e-07
SAMHD1	2.86519e-11	0.284487	0.24	0.145	8.86118e-07
TANC1	2.87802e-11	0.250718	0.416	0.286	8.90086e-07
UBASH3B	2.89468e-11	0.38767	0.128	0.062	8.95238e-07
ALK	3.12889e-11	0.32858	0.435	0.314	9.67672e-07
PLOD2	3.70511e-11	0.287079	0.133	0.065	1.14588e-06
G3BP1	3.86289e-11	0.267916	0.146	0.074	1.19468e-06
ZNF365	4.31938e-11	0.285389	0.228	0.136	1.33586e-06
AC023282.1	4.38317e-11	0.314979	0.365	0.249	1.35558e-06
IL1RAP	4.81707e-11	0.350425	0.378	0.262	1.48978e-06
GNAQ	7.188e-11	0.257109	0.494	0.353	2.22303e-06
GRM5	7.60744e-11	0.31324	0.644	0.52	2.35275e-06
TRIO	7.74097e-11	0.340464	0.66	0.537	2.39405e-06
CDH2	8.49187e-11	0.297985	0.395	0.271	2.62628e-06
AC093865.1	8.94761e-11	0.318241	0.198	0.114	2.76723e-06
GALR1	9.35879e-11	0.352215	0.17	0.094	2.89439e-06
ERBB3	1.14732e-10	0.273608	0.229	0.138	3.54831e-06
GLIS3	1.1902e-10	0.604398	0.114	0.054	3.68095e-06
FLRT2	1.19755e-10	0.296463	0.417	0.295	3.70367e-06
PRNP	1.24431e-10	0.262462	0.267	0.17	3.84829e-06
MED13	1.42324e-10	0.259687	0.304	0.198	4.40166e-06
BCAN	1.45192e-10	0.331297	0.605	0.463	4.49035e-06
ZMIZ1	1.53158e-10	0.260026	0.323	0.215	4.73672e-06
AL589740.1	2.02214e-10	0.268803	0.546	0.414	6.25388e-06
DUSP1	2.12414e-10	0.287591	0.119	0.058	6.56934e-06
MSI2	2.12994e-10	0.25423	0.524	0.381	6.58728e-06
FAM20C	2.44335e-10	0.275927	0.118	0.056	7.55654e-06
BCAT1	2.83777e-10	0.298336	0.179	0.102	8.77637e-06
CNOT2	3.12786e-10	0.272847	0.341	0.232	9.67355e-06
AFF1	3.2859e-10	0.270474	0.236	0.145	1.01623e-05
SUSD5	3.37416e-10	0.263249	0.111	0.052	1.04353e-05
FOXO1	3.51012e-10	0.312208	0.204	0.121	1.08558e-05
FEM1C	3.72989e-10	0.253182	0.126	0.063	1.15354e-05
TNIK	4.23681e-10	0.280877	0.534	0.397	1.31032e-05
CRTAC1	5.91055e-10	0.266182	0.157	0.085	1.82795e-05
PHACTR3	1.22764e-09	0.254155	0.591	0.461	3.79672e-05
TIAM1	1.3308e-09	0.297697	0.419	0.302	4.11577e-05
CTDSP2	1.50345e-09	0.298208	0.127	0.066	4.64972e-05
EHBP1	1.71354e-09	0.258046	0.387	0.273	5.29947e-05
SOX6	1.80644e-09	0.27014	0.806	0.706	5.58679e-05
ADGRB1	1.86677e-09	0.261644	0.247	0.158	5.77335e-05
OLIG1	1.95153e-09	0.35127	0.644	0.543	6.03551e-05
KCNMA1	1.987e-09	0.26942	0.66	0.548	6.1452e-05
EDIL3	2.20745e-09	0.310374	0.64	0.517	6.82697e-05
DIAPH2	2.53464e-09	0.264212	0.401	0.288	7.83888e-05
ABCA1	3.01172e-09	0.298465	0.204	0.127	9.31434e-05
SUCLG2-AS1	3.15339e-09	0.285768	0.172	0.099	9.75249e-05
ZSWIM6	3.36438e-09	0.27242	0.735	0.625	0.00010405
IPO9-AS1	3.85499e-09	-0.472674	0.395	0.463	0.000119223
DPH6-DT	4.02434e-09	0.331268	0.194	0.119	0.000124461
RAD18	4.05654e-09	0.341015	0.154	0.087	0.000125457
IKZF2	4.77151e-09	0.269204	0.276	0.184	0.000147569
TSC22D4	4.82077e-09	0.269696	0.266	0.177	0.000149092
ZEB1	5.72018e-09	0.255535	0.641	0.512	0.000176908
NDRG2	6.53116e-09	0.275363	0.233	0.149	0.000201989
RYR2	7.35045e-09	-0.563523	0.066	0.128	0.000227327
RAB3IP	7.4496e-09	0.275774	0.453	0.334	0.000230394
TPST1	7.8666e-09	0.385589	0.265	0.179	0.00024329
RALGDS	8.77441e-09	0.302397	0.228	0.146	0.000271366
AC005906.2	1.03378e-08	0.288453	0.17	0.1	0.000319716
TMEM132B	1.05711e-08	0.282711	0.483	0.362	0.000326933
SORBS1	1.25969e-08	0.388812	0.402	0.303	0.000389584
SLC24A2	1.2817e-08	0.325195	0.433	0.327	0.000396392
TMEM108	2.85736e-08	0.402784	0.448	0.334	0.000883695
DNAH11	2.88492e-08	0.274623	0.252	0.169	0.000892221
GPM6B	3.02403e-08	0.251404	0.624	0.507	0.000935243
ARHGEF3	4.18063e-08	0.346843	0.209	0.136	0.00129294
ALDH1L1	6.33345e-08	0.278623	0.137	0.079	0.00195875
SHISA9	6.69387e-08	0.288983	0.477	0.37	0.00207021
ZNF536	9.85761e-08	-0.54075	0.094	0.154	0.00304866
GRIN1	1.14906e-07	-0.471408	0.054	0.106	0.00355369
AC092691.1	1.19135e-07	0.288312	0.697	0.61	0.00368447
ZNF804A	1.49313e-07	0.288193	0.259	0.178	0.0046178
EMID1	1.60187e-07	0.253993	0.213	0.141	0.0049541
PCDH9-AS2	1.73735e-07	-0.374856	0.496	0.538	0.0053731
TIMP3	2.39609e-07	0.310492	0.215	0.142	0.00741038
DPY19L1	2.83966e-07	0.339138	0.112	0.063	0.00878222
SGCD	3.60872e-07	0.338296	0.585	0.487	0.0111607
CEND1	4.46598e-07	0.250074	0.118	0.067	0.0138119
DGKB	5.2634e-07	-0.528107	0.218	0.282	0.0162781
DOCK7	5.68139e-07	0.250368	0.175	0.112	0.0175708
CRISPLD2	1.06445e-06	0.293666	0.228	0.16	0.0329202
AC011246.1	1.28172e-06	0.317886	0.116	0.067	0.0396399
ST18	2.10602e-06	-0.58789	0.078	0.128	0.065133
HDAC9	2.13102e-06	0.263937	0.336	0.254	0.0659061
ZSWIM8	2.37706e-06	0.265985	0.132	0.081	0.0735154
KCNQ3	2.54997e-06	0.324114	0.28	0.207	0.078863
NCALD	3.05556e-06	-0.475305	0.353	0.399	0.0944994
SUMF1	3.94012e-06	-0.4494	0.383	0.428	0.121856
TF	4.64004e-06	-0.696516	0.124	0.174	0.143502
SH3GL3	5.65624e-06	-0.494525	0.07	0.115	0.17493
TRPM3	1.01312e-05	0.272258	0.135	0.087	0.313328
TENM2	1.16439e-05	-0.354397	0.074	0.121	0.36011
KCNQ5	1.66203e-05	-0.422045	0.06	0.101	0.514017
GAP43	1.72997e-05	0.363597	0.145	0.096	0.535027
AK5	2.95812e-05	-0.473279	0.102	0.149	0.914858
MAP7	3.67724e-05	-0.435574	0.106	0.152	1
FRMD5	4.28735e-05	0.279206	0.517	0.425	1
RNF220	4.98463e-05	-0.443226	0.118	0.165	1
CNTN5	6.4805e-05	-0.386626	0.109	0.155	1
KIRREL3	7.42904e-05	-0.404996	0.074	0.114	1
GALNTL6	0.000102239	-0.412061	0.074	0.112	1
RAPGEF5	0.000328415	-0.347916	0.086	0.123	1
IQCJ-SCHIP1	0.000355506	-0.446275	0.143	0.184	1
AC079352.1	0.000388614	-0.437369	0.135	0.175	1
LINC01117	0.000430243	0.303856	0.103	0.07	1
CFTR	0.00050671	-0.438576	0.161	0.2	1
CCSER1	0.000510844	-0.267469	0.335	0.379	1
MFSD4B	0.000596726	-0.448391	0.37	0.392	1
AC110296.1	0.000639435	-0.425455	0.203	0.242	1
SHTN1	0.00118775	-0.427128	0.077	0.107	1
MIAT	0.00121351	-0.318109	0.12	0.155	1
GRIN2A	0.00125753	-0.386204	0.074	0.105	1
PTN	0.00183833	-0.334333	0.509	0.495	1
TTC6	0.00206905	-0.34599	0.145	0.182	1
AGBL4	0.00213135	-0.36215	0.173	0.208	1
MBP	0.00224247	-0.41125	0.381	0.39	1
AL354733.3	0.00225883	-0.468403	0.156	0.187	1
AP002370.2	0.00316655	-0.327291	0.096	0.127	1
YWHAH	0.00326548	-0.363371	0.093	0.123	1
CTNNA3	0.00392235	-0.324697	0.446	0.456	1
SEC62	0.00393525	-0.495327	0.161	0.189	1
PCLO	0.00408404	-0.378096	0.107	0.136	1
ARL17B	0.00423578	-0.25979	0.093	0.122	1
AL353784.1	0.00500395	-0.343666	0.426	0.44	1
AC017101.1	0.00623261	-0.340158	0.085	0.112	1
PDE5A	0.00623678	-0.389114	0.2	0.228	1
LIMCH1	0.00694477	-0.444431	0.121	0.147	1
WASHC1	0.00757473	-0.439205	0.124	0.151	1
PTGDS	0.00858893	-0.389952	0.449	0.444	1
CERCAM	0.00954599	-0.410477	0.115	0.14	1
DLGAP2	0.00975113	-0.355864	0.077	0.101	1
AL359091.1	0.0103941	-0.331016	0.102	0.128	1
COX8A	0.0104796	-0.369072	0.092	0.116	1
LUC7L	0.0109908	-0.353741	0.183	0.209	1
CACNA1E	0.0133429	-0.335249	0.078	0.101	1
MAP1B	0.0136725	-0.450799	0.327	0.34	1
SPCS1	0.0171617	-0.290726	0.079	0.102	1
MEF2C	0.0180686	-0.350601	0.183	0.206	1
PLP1	0.018403	-0.274415	0.272	0.289	1
DYNC1I1	0.0186039	-0.328	0.088	0.11	1
FABP7	0.0201146	-0.30456	0.112	0.134	1
LINC00599	0.0212143	-0.304397	0.284	0.301	1
TUBA1B	0.0220657	-0.374633	0.157	0.18	1
ATP5IF1	0.0223463	-0.309373	0.087	0.108	1
PEX5L	0.0225535	-0.373442	0.271	0.285	1
EPN2-AS1	0.0242281	-0.263302	0.135	0.16	1
SAT1	0.0277845	-0.393683	0.221	0.24	1
C4orf19	0.0298805	-0.266083	0.084	0.105	1
CALM1	0.0317464	-0.385346	0.356	0.36	1
AC008771.1	0.0319537	-0.341293	0.21	0.229	1
LINC02018	0.0339872	-0.259594	0.096	0.117	1
NDUFC2	0.0386412	-0.359489	0.118	0.137	1
AC093535.1	0.0415732	-0.342675	0.102	0.121	1
KIAA0930	0.043519	-0.336838	0.1	0.119	1
AL391807.1	0.0459894	-0.295882	0.198	0.217	1
DNM1	0.0490287	-0.39288	0.213	0.226	1
PACRG	0.0540517	-0.267558	0.093	0.111	1
SYN2	0.0658956	-0.275057	0.177	0.195	1
NDUFB1	0.0673414	-0.264155	0.098	0.115	1
DDX18	0.0787267	-0.284116	0.124	0.141	1
COX7C	0.0804953	-0.315638	0.133	0.149	1
PRPF4B	0.0860036	-0.440877	0.169	0.18	1
CENPP	0.0941151	-0.28482	0.095	0.109	1
NDUFA4	0.0954583	-0.366306	0.208	0.219	1
FILIP1L	0.0997647	-0.255479	0.136	0.152	1
CACNA2D3	0.105005	-0.254583	0.372	0.368	1
LINC01572	0.107009	-0.289802	0.23	0.243	1
RFX3-AS1	0.117828	-0.25886	0.117	0.131	1
BEX1	0.126112	-0.303898	0.126	0.139	1
DDX24	0.135767	-0.387213	0.158	0.168	1
AC096576.2	0.142475	-0.297698	0.101	0.113	1
S100B	0.145548	-0.328913	0.31	0.307	1
RAPH1	0.169335	-0.338836	0.199	0.206	1
ENO2	0.181049	-0.259372	0.111	0.123	1
POLR2J3	0.182473	-0.328311	0.159	0.167	1
MYCBP2-AS1	0.185103	-0.290525	0.124	0.135	1
LINC01301	0.197325	-0.336212	0.099	0.109	1
ATP5F1E	0.21463	-0.2857	0.173	0.182	1
SPTBN4	0.224673	-0.305271	0.163	0.17	1
TTLL7	0.226009	-0.262616	0.32	0.271	1
NDUFB2	0.226294	-0.279958	0.109	0.12	1
GRIA1	0.22907	-0.302439	0.121	0.13	1
ARHGAP26	0.237666	-0.295621	0.096	0.106	1
MGST3	0.240543	-0.298048	0.139	0.149	1
TUT4	0.242093	-0.310541	0.344	0.332	1
LINC00632	0.244585	-0.322219	0.295	0.291	1
MPHOSPH8	0.247587	-0.314226	0.147	0.154	1
FAM228B	0.251075	-0.253918	0.097	0.107	1
RPL13	0.256528	-0.353621	0.379	0.359	1
RPL11	0.258742	-0.282622	0.182	0.188	1
PTPRN2	0.27354	-0.256295	0.324	0.315	1
MAK	0.292472	-0.325303	0.16	0.166	1
CALD1	0.310497	-0.254351	0.156	0.161	1
CALM3	0.322755	-0.273327	0.154	0.16	1
ANAPC5	0.323097	-0.260611	0.162	0.168	1
PLEKHH2	0.355998	-0.285263	0.252	0.249	1
WDR60	0.367128	-0.362085	0.193	0.194	1
RPS26	0.369083	-0.296816	0.183	0.185	1
NCDN	0.377581	-0.307078	0.094	0.1	1
SCG5	0.414976	-0.25517	0.104	0.109	1
KCNQ1OT1	0.41674	-0.28806	0.216	0.214	1
SRP14	0.420839	-0.280376	0.211	0.212	1
ZRANB2	0.449117	-0.267101	0.19	0.19	1
ANKUB1	0.456466	-0.274197	0.176	0.177	1
COX6C	0.462748	-0.259507	0.159	0.162	1
UQCR10	0.495664	-0.309374	0.131	0.134	1
HNRNPDL	0.579396	-0.316112	0.343	0.321	1
RPL34	0.599575	-0.316858	0.164	0.162	1
HMGN1	0.606389	-0.2998	0.205	0.199	1
IDS	0.617316	-0.328579	0.176	0.172	1
CEP126	0.624787	-0.263495	0.135	0.136	1
RABGEF1	0.629293	-0.342311	0.276	0.259	1
ATP5ME	0.676069	-0.276549	0.18	0.176	1
CRYAB	0.676365	-0.306674	0.1	0.101	1
CST3	0.694235	-0.374696	0.517	0.456	1
AHI1	0.706169	-0.287122	0.274	0.259	1
OTUD7A	0.716121	-0.264145	0.258	0.233	1
ENOX1	0.731362	-0.273749	0.219	0.21	1
ATP8A1	0.732218	-0.268532	0.28	0.251	1
PI4KA	0.734391	-0.313671	0.228	0.217	1
ERO1B	0.746732	-0.287652	0.177	0.171	1
RPL9	0.768294	-0.252591	0.126	0.124	1
PCSK1N	0.780828	-0.29827	0.243	0.231	1
EMC10	0.80619	-0.309148	0.198	0.182	1
AL138828.1	0.827455	-0.27497	0.121	0.118	1
IQCK	0.831818	-0.271734	0.265	0.25	1
DSTN	0.915761	-0.255444	0.156	0.15	1
NDUFA10	0.941322	-0.274526	0.153	0.145	1
ITGA9-AS1	0.96025	-0.272338	0.121	0.117	1
ELOB	0.975802	-0.278591	0.157	0.15	1
DYNC1I2	0.975805	-0.26786	0.161	0.153	1

## Sheet: End_AD_logNorm_diffEx
gene	p_val	avg_log2FC	pct.1	pct.2	p_val_adj
SLCO4A1	5.34624e-11	2.64768	0.528	0.076	1.65343e-06
FLT1	1.01309e-10	1.84632	0.724	0.318	3.13319e-06
MT2A	1.26284e-10	1.77622	0.804	0.47	3.9056e-06
BSG	1.3296e-10	2.30775	0.682	0.303	4.11206e-06
CLDN5	5.16896e-10	1.55642	0.731	0.273	1.5986e-05
CTSC	5.24302e-10	-1.14382	0.014	0.197	1.62151e-05
S100B	4.37484e-09	-1.36237	0.028	0.227	0.000135301
CD14	6.66131e-09	-1.51722	0.007	0.152	0.000206014
COTL1	7.81671e-09	-1.41675	0.035	0.242	0.000241747
AOAH	1.70999e-08	-1.03279	0.021	0.197	0.000528847
TYROBP	2.54884e-08	-1.69265	0.014	0.167	0.000788279
HAMP	3.34688e-08	-2.93915	0.01	0.152	0.00103509
ANKRD37	3.79581e-08	3.18009	0.36	0.015	0.00117393
MALAT1	4.43418e-08	-0.769368	0.997	0.97	0.00137136
NT5C	5.16534e-08	-0.801798	0.003	0.121	0.00159748
YIF1A	1.38027e-07	-0.932388	0.031	0.212	0.00426876
PREX1	2.48855e-07	-1.21803	0.105	0.364	0.00769634
APOC2	2.54125e-07	-1.70128	0.014	0.152	0.00785932
TGM2	2.94968e-07	1.94342	0.458	0.121	0.00912249
PIGF	3.00829e-07	-1.08605	0.014	0.152	0.00930374
ITIH5	3.3259e-07	1.58797	0.448	0.091	0.010286
APOLD1	3.49082e-07	1.92441	0.451	0.121	0.010796
FCGR3A	3.5577e-07	-0.927682	0.014	0.152	0.0110029
PLAC8	4.47423e-07	-1.1902	0.007	0.121	0.0138374
GPR183	4.85347e-07	-1.48504	0.003	0.106	0.0150103
TNFAIP3	5.30479e-07	-1.08603	0.007	0.121	0.0164061
TMSB10	7.43058e-07	1.15245	0.829	0.606	0.0229806
ST6GALNAC3	9.70197e-07	1.52245	0.626	0.333	0.0300053
S100A8	1.55937e-06	-2.87529	0.014	0.136	0.0482265
GALNT18	1.9908e-06	1.45143	0.49	0.152	0.0615694
YAF2	2.40978e-06	-1.03326	0.049	0.227	0.0745273
C1QA	2.5499e-06	-1.2193	0.024	0.167	0.0788607
SLC2A5	2.90929e-06	-1.19431	0.01	0.121	0.0899755
S100A9	3.09231e-06	-2.42406	0.021	0.152	0.0956359
NAALADL2	3.11013e-06	-1.1925	0.031	0.182	0.0961871
VWF	3.20742e-06	1.24058	0.612	0.273	0.0991959
OLR1	3.31278e-06	-1.3769	0.01	0.121	0.102454
IFITM3	3.42317e-06	1.18138	0.682	0.409	0.105868
HCK	3.76964e-06	-0.789367	0.01	0.121	0.116584
GNG11	3.89731e-06	1.75559	0.437	0.136	0.120532
CAPN2	4.11038e-06	-1.18984	0.052	0.227	0.127122
PTTG1IP	4.11793e-06	1.7082	0.444	0.152	0.127355
TBXAS1	4.19593e-06	-0.579152	0.01	0.121	0.129767
PTPRE	4.42767e-06	-0.936208	0.021	0.152	0.136935
PODXL	4.63902e-06	1.41566	0.493	0.182	0.143471
FCGR1A	4.8336e-06	-0.931695	0.007	0.106	0.149489
RGS19	5.06524e-06	-0.687881	0.007	0.106	0.156653
ARHGDIB	5.57527e-06	-0.786152	0.021	0.152	0.172426
EPAS1	5.72786e-06	1.34025	0.503	0.197	0.177146
PPFIBP1	7.66529e-06	1.45886	0.503	0.197	0.237064
TSC22D1	8.37578e-06	1.30803	0.622	0.333	0.259038
TAF1D	1.07538e-05	-0.99811	0.042	0.197	0.332582
EGFL7	1.13732e-05	1.49447	0.479	0.197	0.35174
EMP2	1.17839e-05	1.56317	0.36	0.091	0.364442
LAPTM5	1.21712e-05	-0.724998	0.028	0.167	0.376418
AIF1	1.23153e-05	-1.99073	0.031	0.167	0.380877
HAVCR2	1.32236e-05	-1.22648	0.014	0.121	0.408965
ATP5PO	1.33373e-05	-0.889868	0.049	0.212	0.412482
ATP10A	1.33452e-05	1.14233	0.549	0.227	0.412728
HTRA1	1.50061e-05	-0.952568	0.056	0.227	0.464093
ENOSF1	1.5694e-05	-0.991131	0.024	0.152	0.485369
HLA-DRA	1.62158e-05	-0.794835	0.024	0.152	0.501506
MRPS26	1.70123e-05	-0.774781	0.014	0.121	0.52614
AL929091.1	1.72651e-05	1.99355	0.259	0.015	0.533957
CD59	1.76645e-05	1.27105	0.476	0.182	0.546311
SAMSN1	1.80232e-05	-1.11878	0.014	0.121	0.557402
CHST11	2.05686e-05	-1.07349	0.098	0.303	0.636126
SLC7A14-AS1	2.29661e-05	-1.45839	0.01	0.106	0.710271
DEPP1	2.35388e-05	1.89184	0.332	0.076	0.727985
IGFBP7	2.44538e-05	1.1208	0.507	0.227	0.756281
ENO1	2.67501e-05	-1.04584	0.091	0.288	0.827302
SLC1A2	2.8061e-05	-1.61248	0.056	0.212	0.867843
MTHFS	2.94139e-05	-0.575035	0.01	0.106	0.909683
TSPO	2.94562e-05	-0.757831	0.038	0.182	0.910993
C1QC	2.99205e-05	-1.47548	0.021	0.136	0.925351
PTPRC	3.02847e-05	-1.2414	0.045	0.197	0.936615
CD53	3.02962e-05	-0.673658	0.031	0.167	0.93697
ROGDI	3.18298e-05	-1.32754	0.035	0.167	0.984401
MEG3	3.90946e-05	-1.2624	0.157	0.364	1
ITGB2	4.39111e-05	-0.695079	0.021	0.136	1
PSMB3	5.31772e-05	-0.809655	0.07	0.242	1
MT1E	5.41886e-05	1.21403	0.5	0.242	1
ESAM	5.69432e-05	1.71138	0.329	0.091	1
GDAP1	5.84503e-05	-0.874225	0.017	0.121	1
PYCARD	6.71617e-05	-0.801593	0.017	0.121	1
LCP1	6.95241e-05	-0.741481	0.017	0.121	1
PSME2	7.06348e-05	-0.826816	0.063	0.227	1
PHPT1	7.12545e-05	-0.958554	0.066	0.227	1
PQBP1	7.1965e-05	-0.603939	0.017	0.121	1
CRIP2	7.32779e-05	1.25771	0.346	0.091	1
AKAP12	7.38213e-05	1.71588	0.371	0.121	1
CARD16	7.44868e-05	-0.488598	0.017	0.121	1
IFI27	7.77057e-05	0.554935	0.577	0.242	1
IFITM2	8.10685e-05	1.08257	0.514	0.242	1
GOLGA8A	8.25631e-05	-0.359781	0.017	0.121	1
CALM1	8.64557e-05	0.846745	0.654	0.47	1
SPARCL1	8.83368e-05	0.945985	0.629	0.348	1
OSGEP	9.52336e-05	-1.06794	0.014	0.106	1
PCNX2	9.9709e-05	-0.867622	0.031	0.152	1
WDFY2	0.000100611	-1.12194	0.045	0.182	1
MCF2L2	0.000104386	-1.26917	0.014	0.106	1
CORO1A	0.000105244	-0.75454	0.024	0.136	1
SNRNP70	0.000105887	-1.05299	0.105	0.288	1
FCER1G	0.000106314	-1.20352	0.014	0.106	1
CD163	0.000106314	-0.967422	0.014	0.106	1
CCDC130	0.000108274	-0.814494	0.014	0.106	1
SLC2A1	0.000110186	1.15965	0.472	0.212	1
LYN	0.000111589	-1.12307	0.038	0.167	1
SLC7A5	0.000113848	1.26947	0.51	0.273	1
TMEM131L	0.000120776	-0.818036	0.014	0.106	1
RPS28	0.000122165	1.02645	0.78	0.667	1
ALOX5AP	0.000122987	-0.70967	0.014	0.106	1
OXLD1	0.000122987	-0.655873	0.014	0.106	1
EHD2	0.00012486	1.87331	0.213	0.015	1
ERG	0.000126528	1.39941	0.441	0.182	1
RBM3	0.000128344	-0.60103	0.031	0.152	1
PGP	0.000129853	-0.375732	0.014	0.106	1
TACC1	0.00013031	0.791627	0.608	0.333	1
NME1	0.000132221	-0.610983	0.014	0.106	1
SRARP	0.000142608	1.71082	0.273	0.061	1
PCED1B	0.000143418	-0.698338	0.031	0.152	1
CBFA2T2	0.000149008	-1.03042	0.07	0.227	1
C1QB	0.000151158	-1.79168	0.042	0.167	1
AGBL4	0.000162369	-1.09666	0.021	0.121	1
SEC14L1	0.000168308	1.20273	0.444	0.197	1
CDIPT	0.000184286	-0.813838	0.021	0.121	1
PON2	0.000187609	1.3322	0.409	0.167	1
TMOD3	0.000200482	1.60234	0.287	0.076	1
RXRA	0.000205715	-0.758058	0.021	0.121	1
SNRPD1	0.00020866	-0.382961	0.045	0.182	1
PARP8	0.000212458	-0.647226	0.049	0.182	1
MT1M	0.000220869	1.49136	0.406	0.182	1
SCARB1	0.000222862	1.55652	0.423	0.197	1
SLC16A1	0.000224827	1.3202	0.388	0.152	1
SPATA6	0.000225218	-1.06823	0.042	0.167	1
ATP6V1B2	0.000227331	-0.916865	0.028	0.136	1
ADAM9	0.000233869	-0.918037	0.028	0.136	1
PRKCI	0.000244642	-0.915248	0.035	0.152	1
PRX	0.000245544	1.49669	0.206	0.015	1
SLC9A3R2	0.000254847	1.37634	0.336	0.106	1
PPP1R14B	0.000264103	-0.640183	0.042	0.167	1
ERBB4	0.000278962	-1.07697	0.077	0.227	1
AKAP7	0.000284816	-0.456028	0.028	0.136	1
ILF2	0.000288827	-0.386641	0.028	0.136	1
EPB41L3	0.000290284	-0.647266	0.049	0.182	1
PTGDS	0.000296773	-0.994727	0.203	0.409	1
BLOC1S1	0.000316881	-0.568625	0.056	0.197	1
LCLAT1	0.000319874	-0.850371	0.017	0.106	1
ETS2	0.000355195	1.34259	0.385	0.167	1
PLA2G4A	0.000364552	-0.823177	0.017	0.106	1
NXN	0.000365922	1.19513	0.441	0.212	1
KCNQ3	0.000375693	-1.53974	0.045	0.167	1
CEBPB	0.000381538	-1.02062	0.052	0.182	1
CACNA1D	0.000382762	-0.646152	0.017	0.106	1
COX7A1	0.000386097	1.54943	0.241	0.045	1
PDE10A	0.000391397	1.37894	0.29	0.076	1
ELOVL7	0.000411715	1.0437	0.462	0.227	1
ZDHHC14	0.000417646	-1.06104	0.063	0.197	1
CPED1	0.000421761	-0.571201	0.017	0.106	1
AKAP6	0.000423373	-1.32516	0.056	0.182	1
RPL7	0.000442043	-0.826035	0.087	0.242	1
STOM	0.000458736	1.41191	0.353	0.152	1
PTPN2	0.000484784	-0.790566	0.045	0.167	1
TF	0.000487299	-1.00936	0.031	0.136	1
IGSF21	0.000500271	-0.7569	0.031	0.136	1
AC211433.1	0.000501433	-0.732147	0.024	0.121	1
SH3BP4	0.000501973	1.54147	0.185	0.015	1
ATM	0.000513004	-0.793403	0.087	0.242	1
DOCK10	0.000514872	-0.906097	0.08	0.227	1
PTPRJ	0.000523154	-1.1572	0.063	0.197	1
RAD50	0.0005234	-0.742014	0.024	0.121	1
IQGAP2	0.00053092	-0.936858	0.024	0.121	1
NUP188	0.00053092	-0.726954	0.024	0.121	1
CSTF3	0.00053292	-0.886888	0.038	0.152	1
NAA40	0.000554087	-0.643887	0.024	0.121	1
HCLS1	0.000566402	-0.675926	0.031	0.136	1
CSF1R	0.000570051	-0.43136	0.024	0.121	1
ADAM28	0.000603273	-0.472129	0.024	0.121	1
NUDT5	0.000611855	-0.472744	0.024	0.121	1
ARHGAP24	0.000635547	-1.13308	0.049	0.167	1
ERBIN	0.000644799	-0.599187	0.178	0.364	1
OPCML	0.000663626	-1.23614	0.066	0.197	1
HMGN2	0.00066643	-0.521178	0.045	0.167	1
MT1X	0.000678107	1.33324	0.346	0.136	1
RBM17	0.000683341	1.15987	0.325	0.121	1
HSPB11	0.000692031	-0.461507	0.031	0.136	1
ST8SIA6	0.000708738	1.22338	0.297	0.091	1
RNASET2	0.000714435	-0.754384	0.063	0.197	1
FLI1	0.000718847	1.08574	0.392	0.167	1
VPS28	0.000721572	-0.703385	0.063	0.197	1
SLC2A3	0.000735368	1.09123	0.437	0.227	1
BTNL9	0.000755612	1.17729	0.252	0.061	1
FAM49B	0.00075797	-1.02208	0.105	0.258	1
BACE2	0.000765004	1.26346	0.28	0.076	1
NHP2	0.000809077	-0.967997	0.049	0.167	1
CCNY	0.000832412	1.12502	0.497	0.303	1
TMEM63A	0.00083513	-1.25828	0.028	0.121	1
CAPZB	0.000851794	-1.08558	0.119	0.273	1
CFL1	0.000873698	-0.850759	0.238	0.424	1
C20orf194	0.000876694	-1.09031	0.098	0.242	1
SNCA	0.000894571	-0.874753	0.042	0.152	1
RIMS1	0.000897784	-0.839956	0.021	0.106	1
SBNO1	0.000910797	-0.875486	0.066	0.197	1
TRAPPC13	0.000992856	-0.991125	0.028	0.121	1
ZNF131	0.00100274	-0.735993	0.042	0.152	1
PMS1	0.00101944	-0.774991	0.028	0.121	1
ABHD18	0.0010208	-0.880075	0.035	0.136	1
TIE1	0.00103544	0.85499	0.203	0.03	1
EPB41L2	0.00104353	-0.912232	0.115	0.273	1
FAR2	0.00108466	-0.787388	0.035	0.136	1
C14orf119	0.0010856	-0.713546	0.021	0.106	1
RIN3	0.00110318	-0.80512	0.028	0.121	1
ATP2C1	0.00111859	-0.723389	0.066	0.197	1
MICOS13	0.00116148	-0.582042	0.042	0.152	1
ZNF366	0.00118603	1.7197	0.21	0.045	1
MAFF	0.00119041	1.438	0.168	0.015	1
NIBAN1	0.00120898	-0.885086	0.035	0.136	1
SDHB	0.00122476	-0.553282	0.028	0.121	1
RNPEPL1	0.00122476	-0.507903	0.028	0.121	1
SPOCK2	0.001265	0.917014	0.406	0.197	1
PTMA	0.00128795	0.619956	0.734	0.53	1
DOCK8	0.00132831	-0.50276	0.042	0.152	1
RTF2	0.00134317	-0.473898	0.042	0.152	1
PSMA5	0.00135859	-0.270346	0.028	0.121	1
RPS26	0.00140743	1.01702	0.528	0.364	1
TYMP	0.00141218	-0.44883	0.028	0.121	1
LAMTOR2	0.00144898	-0.455308	0.028	0.121	1
SPTLC2	0.00147822	-0.588089	0.059	0.182	1
APBB1IP	0.00148665	-0.349849	0.028	0.121	1
TK2	0.00149772	-0.995893	0.045	0.152	1
SRGAP1	0.00153039	-1.0476	0.045	0.152	1
ARHGAP29	0.00158459	0.670484	0.43	0.197	1
CTSB	0.00162507	-0.758134	0.115	0.273	1
MVP	0.00164403	-0.677911	0.077	0.212	1
SYNE1	0.00167527	1.03997	0.399	0.212	1
TMEM123	0.00168286	1.19215	0.273	0.091	1
DDX50	0.00174055	-0.78538	0.045	0.152	1
TOMM6	0.00174164	-0.554981	0.059	0.182	1
PARVB	0.00175336	1.2713	0.227	0.061	1
WWTR1	0.00177645	0.968622	0.385	0.182	1
ARHGAP15	0.0018553	-0.773089	0.045	0.152	1
ITPK1	0.00186543	-0.796543	0.038	0.136	1
SPRED1	0.00191133	-0.723039	0.07	0.197	1
NCBP2	0.00192666	-1.00472	0.031	0.121	1
HES4	0.00193481	1.92807	0.157	0.015	1
MRPL33	0.00193899	1.50852	0.199	0.045	1
MAP4K3	0.00195997	-0.824298	0.136	0.288	1
CERCAM	0.00199625	-0.903828	0.038	0.136	1
PFKFB3	0.00201912	-0.699006	0.045	0.152	1
MFSD2A	0.00205154	1.03211	0.367	0.167	1
SLC8A1	0.00212703	-0.930909	0.08	0.212	1
TINAGL1	0.00214749	1.39478	0.175	0.03	1
NLRC5	0.00217535	-0.957436	0.031	0.121	1
FAM107A	0.0021768	0.863557	0.399	0.182	1
TOMM5	0.00219124	-0.459166	0.052	0.167	1
ARHGAP12	0.00222732	-0.790163	0.056	0.167	1
RIPOR2	0.00233432	-0.904291	0.024	0.106	1
MARCH1	0.00236054	-0.856505	0.056	0.167	1
ATP5F1B	0.00238104	-0.840341	0.094	0.227	1
RPL22L1	0.00242828	-0.618421	0.024	0.106	1
LGALS9	0.00242828	-0.627149	0.024	0.106	1
LDLRAD4	0.00244994	-1.13485	0.108	0.242	1
BLMH	0.00246036	-0.608552	0.024	0.106	1
ERH	0.00249283	-0.704013	0.073	0.197	1
YBX3	0.00251953	1.5631	0.276	0.121	1
IFI44L	0.0025232	-0.436084	0.038	0.136	1
CGNL1	0.00255393	0.937395	0.318	0.121	1
NMI	0.00255893	-0.483649	0.024	0.106	1
ABCB1	0.00262997	0.254838	0.545	0.273	1
APMAP	0.00263505	-0.476005	0.031	0.121	1
NPM1	0.00267602	-0.465127	0.098	0.242	1
TM4SF1	0.00268214	0.986791	0.336	0.152	1
MAGOHB	0.00269599	-0.437222	0.024	0.106	1
NORAD	0.00270701	1.11564	0.178	0.03	1
ITGB1	0.00279068	0.941712	0.409	0.227	1
PIK3AP1	0.00279595	-0.785202	0.031	0.121	1
POLR2G	0.00279595	-0.381813	0.031	0.121	1
HES1	0.00288183	1.53694	0.339	0.167	1
MAGI2	0.0029	-0.936033	0.15	0.303	1
NOC2L	0.00291418	-0.31418	0.024	0.106	1
REEP3	0.00291677	1.161	0.238	0.076	1
ID2	0.00297798	-1.23091	0.042	0.136	1
WDR60	0.00300507	1.43158	0.171	0.03	1
SHANK3	0.00307472	1.29065	0.192	0.045	1
NDUFA4L2	0.00309552	1.55135	0.192	0.045	1
ICAM2	0.00310995	1.02305	0.318	0.136	1
CPNE8	0.00312128	1.03651	0.248	0.076	1
CDC42SE1	0.0032521	-0.735282	0.133	0.288	1
SLC7A1	0.00329963	1.07527	0.42	0.242	1
ADAMTS1	0.00331944	1.56989	0.119	0	1
RGCC	0.00343307	0.992865	0.329	0.136	1
MT1F	0.00343389	1.31738	0.168	0.03	1
PECAM1	0.0034404	0.958353	0.367	0.182	1
CDK12	0.00349853	-0.968601	0.059	0.167	1
EIF5A	0.00353578	-0.296857	0.073	0.197	1
CFDP1	0.00362749	1.41589	0.206	0.061	1
ITGA6	0.00374836	0.608773	0.255	0.076	1
TDRP	0.00383578	0.998011	0.147	0.015	1
ABCG1	0.00386821	1.0815	0.115	0	1
MIR99AHG	0.00388376	-1.06161	0.112	0.242	1
GRIA4	0.0039544	-0.985123	0.028	0.106	1
TLN2	0.00400641	-0.681737	0.035	0.121	1
TTC17	0.00401018	-0.745651	0.108	0.242	1
PPP2R1A	0.00406019	-0.41627	0.066	0.182	1
LSM3	0.00407976	-0.670894	0.042	0.136	1
TOR1AIP1	0.00412216	-0.516334	0.042	0.136	1
C12orf57	0.00414115	1.42302	0.161	0.03	1
ECE1	0.00415057	1.34272	0.238	0.091	1
PCAT19	0.00424851	1.50592	0.203	0.061	1
PSMB8	0.00426497	-0.332951	0.049	0.152	1
SART1	0.00430458	-0.824252	0.028	0.106	1
ADAM17	0.00432889	-0.59439	0.087	0.212	1
NUP160	0.00433023	-0.600164	0.035	0.121	1
C4orf48	0.00447001	-0.61298	0.059	0.167	1
BNC2	0.00447001	-0.638249	0.059	0.167	1
RBIS	0.00447604	-0.437244	0.042	0.136	1
HLA-DPB1	0.00447614	-0.67171	0.035	0.121	1
CASP4	0.00449903	-0.501856	0.042	0.136	1
SESTD1	0.00455594	1.29507	0.203	0.061	1
HNRNPDL	0.00456746	-0.575632	0.168	0.333	1
RPL22	0.00456821	-0.635572	0.224	0.394	1
PGAM1	0.00463309	-0.576167	0.059	0.167	1
ROBO4	0.00467469	1.09468	0.164	0.03	1
HSDL2	0.00468265	-0.77259	0.028	0.106	1
AGO4	0.00469043	-0.966666	0.045	0.136	1
CCNDBP1	0.00471075	-0.825839	0.028	0.106	1
BCL2L13	0.00472924	-0.569965	0.035	0.121	1
RIMKLB	0.00476952	1.63383	0.224	0.076	1
TUBB4B	0.0047949	1.16656	0.206	0.061	1
SIRPA	0.00483406	-0.607416	0.035	0.121	1
ASH1L	0.00485995	-0.878755	0.21	0.364	1
TANC2	0.00488151	-1.17512	0.084	0.197	1
ARL3	0.00490689	-0.272888	0.042	0.136	1
PFKP	0.00491453	1.03509	0.14	0.015	1
SLAIN1	0.00495065	-0.820057	0.052	0.152	1
AC080132.1	0.00499202	0.908188	0.217	0.061	1
POR	0.0049972	-0.863532	0.052	0.152	1
NEDD4	0.00511477	1.08277	0.161	0.03	1
SLC9A9	0.00521461	-0.299676	0.042	0.136	1
ZEB2	0.00522563	-0.962345	0.133	0.273	1
PLXND1	0.00524573	1.12544	0.108	0	1
CENPP	0.00528507	-0.934287	0.063	0.167	1
PTPN14	0.00528536	0.97575	0.213	0.061	1
CDH11	0.0052954	-1.07043	0.094	0.212	1
PLAT	0.00535234	1.21525	0.22	0.076	1
COX14	0.00541579	-0.613594	0.07	0.182	1
ABCG2	0.00553025	0.388239	0.346	0.152	1
HLA-E	0.00553065	0.738359	0.535	0.379	1
NCK2	0.00558101	-0.342433	0.059	0.167	1
PRKCA	0.00569042	-1.033	0.15	0.288	1
PLGRKT	0.00572901	-0.411504	0.028	0.106	1
HSP90B1	0.00574485	1.19461	0.339	0.197	1
HILPDA	0.00578351	1.4421	0.154	0.03	1
MBP	0.00587347	-0.489416	0.14	0.288	1
ADGRL4	0.0060246	0.988819	0.283	0.121	1
PALM	0.00610069	1.18172	0.133	0.015	1
ETFB	0.00614444	-0.328891	0.059	0.167	1
CYBA	0.00614555	-0.862649	0.105	0.227	1
ANGPT2	0.00622073	1.37107	0.346	0.182	1
C3	0.00630273	-1.07853	0.045	0.136	1
DIDO1	0.00630605	-0.722248	0.063	0.167	1
ADD3	0.00633205	-0.989279	0.056	0.152	1
AC074032.1	0.00650466	-0.860269	0.056	0.152	1
ADK	0.00660396	-0.519229	0.108	0.242	1
GRB10	0.00660613	0.91899	0.206	0.061	1
SAT1	0.00667517	-0.852552	0.276	0.409	1
TMEM204	0.00673153	1.29745	0.15	0.03	1
NR3C2	0.0067644	0.799516	0.311	0.136	1
XIST	0.00678877	-0.849526	0.161	0.303	1
TAGLN2	0.00693951	1.10214	0.308	0.152	1
CNP	0.00695187	-0.81005	0.066	0.167	1
RAPGEF4	0.00699069	1.11324	0.29	0.136	1
TMA7	0.00702611	1.18293	0.36	0.212	1
ITGA1	0.00704857	0.957752	0.227	0.076	1
UNC5C	0.00710532	-0.78105	0.038	0.121	1
LARP4B	0.00715216	-0.615572	0.073	0.182	1
DISC1	0.00719972	-0.557914	0.091	0.212	1
INSR	0.00725684	0.931426	0.378	0.197	1
SGPP2	0.00743992	1.16895	0.213	0.076	1
ST8SIA4	0.00763318	-0.638242	0.038	0.121	1
MAOA	0.00767576	1.18537	0.126	0.015	1
ME2	0.00771139	-0.571694	0.038	0.121	1
ANXA4	0.00775074	-0.599672	0.038	0.121	1
ATP1A1	0.00775508	0.961719	0.29	0.136	1
CNKSR3	0.00777119	0.702858	0.206	0.061	1
PSMD9	0.0078598	-0.407137	0.045	0.136	1
SORL1	0.00786458	-0.652183	0.073	0.182	1
DOCK9	0.00794701	0.5539	0.423	0.242	1
LRMDA	0.00809927	-0.769497	0.22	0.364	1
ANXA1	0.00811333	-1.01261	0.038	0.121	1
IQCJ-SCHIP1	0.0081246	-1.13586	0.07	0.167	1
DIPK2B	0.00815095	1.04718	0.217	0.076	1
FBXL7	0.00839339	1.14162	0.15	0.03	1
PCM1	0.00840306	-0.886818	0.147	0.273	1
MAP1LC3B	0.00842195	0.997914	0.175	0.045	1
MAF	0.00847812	-0.722144	0.056	0.152	1
ERP44	0.00862033	-0.418057	0.038	0.121	1
VPS13A	0.00862504	-0.652653	0.105	0.227	1
DNAJC13	0.00869687	-0.69883	0.049	0.136	1
TNS1	0.00869838	0.731546	0.343	0.167	1
ATP8A1	0.00870231	-0.545565	0.056	0.152	1
MSI2	0.00888	1.04411	0.301	0.152	1
MYO1E	0.00900131	0.97372	0.273	0.121	1
ENTPD6	0.00904793	-0.59404	0.031	0.106	1
RIPOR1	0.00917413	1.17776	0.168	0.045	1
GPM6A	0.00922971	-0.695257	0.087	0.197	1
SREBF2	0.00928592	-0.725817	0.077	0.182	1
CLIC5	0.00944655	1.10007	0.122	0.015	1
THRA	0.00953518	-0.914383	0.07	0.167	1
NSUN2	0.00955179	-0.626396	0.031	0.106	1
WDSUB1	0.00961756	-0.730904	0.049	0.136	1
PRKCH	0.00976298	0.836	0.367	0.212	1
STAT3	0.00979508	0.629653	0.364	0.212	1
S100A10	0.00980097	1.12357	0.392	0.258	1
KCNMA1	0.00985133	-0.647173	0.087	0.197	1
ATP6V1F	0.00993127	-0.430345	0.073	0.182	1
PKN2	0.01008	-0.711865	0.108	0.227	1
NMT1	0.0100875	0.961218	0.255	0.106	1
MAML2	0.0101394	-0.786701	0.161	0.303	1
RNF149	0.0102023	-0.681901	0.066	0.167	1
USP47	0.0102862	-0.688283	0.087	0.197	1
RAB28	0.0103488	-0.829018	0.042	0.121	1
MGST2	0.0104058	1.1073	0.185	0.061	1
HIVEP3	0.0104828	-0.829204	0.07	0.167	1
KIF5A	0.01055	-0.920509	0.042	0.121	1
KLHDC10	0.0107201	-0.595643	0.049	0.136	1
DIAPH2	0.0107878	-0.53013	0.066	0.167	1
BHLHE40	0.0109554	1.01437	0.248	0.106	1
LRRC4C	0.0109628	-1.21713	0.042	0.121	1
S1PR1	0.0110074	0.76682	0.213	0.076	1
IBTK	0.0110715	-0.649961	0.059	0.152	1
MED13L	0.0112921	-0.60427	0.273	0.439	1
HDAC9	0.0113125	-0.467378	0.049	0.136	1
CNOT8	0.0115026	0.934432	0.189	0.061	1
LRRC7	0.0115163	-0.542007	0.049	0.136	1
DBI	0.0116729	-0.882093	0.115	0.227	1
AC131944.1	0.0117022	-0.316145	0.031	0.106	1
ARSB	0.0118318	-0.744924	0.042	0.121	1
RAB1B	0.0118612	1.34111	0.115	0.015	1
CEP192	0.0119549	-0.370998	0.066	0.167	1
CAVIN2	0.0119603	0.996335	0.276	0.136	1
NDUFS6	0.011994	-0.543997	0.077	0.182	1
ALCAM	0.012027	-0.673489	0.059	0.152	1
SH3RF3	0.0120305	-0.457766	0.087	0.197	1
SHTN1	0.0121265	-0.63273	0.059	0.152	1
DST	0.0122143	-0.731497	0.091	0.197	1
BIN1	0.0122649	-0.80512	0.101	0.212	1
TBX3	0.0123123	0.922034	0.119	0.015	1
PTPRM	0.0124976	0.626498	0.423	0.242	1
MORF4L1	0.0125539	0.903731	0.255	0.121	1
RAPGEF6	0.0126109	-0.505675	0.098	0.212	1
PAPSS2	0.0129687	0.894179	0.185	0.061	1
CEBPD	0.0129781	1.04679	0.346	0.197	1
NEDD9	0.0130469	0.902215	0.262	0.121	1
MECOM	0.0131497	0.940031	0.388	0.227	1
RBM6	0.0131986	-0.535069	0.206	0.348	1
LRRC32	0.0132286	0.89308	0.227	0.091	1
TIMP1	0.013241	-0.800416	0.08	0.182	1
STRN3	0.0132767	0.920263	0.185	0.061	1
DTWD1	0.0135003	-0.492206	0.042	0.121	1
LARP1B	0.0135441	-0.344957	0.066	0.167	1
CRLF3	0.0136228	-0.93556	0.094	0.197	1
EIF3F	0.0136527	-0.760879	0.052	0.136	1
PAG1	0.0137549	-0.281791	0.042	0.121	1
ROBO1	0.0138838	-0.485819	0.042	0.121	1
PTPRB	0.0139085	0.705738	0.283	0.136	1
CAVIN1	0.014026	1.0525	0.182	0.061	1
HLA-DPA1	0.0141448	-0.395009	0.042	0.121	1
SMURF1	0.0142312	-0.55606	0.08	0.182	1
CTSH	0.0142769	-0.472839	0.042	0.121	1
SYNJ2	0.014387	-0.745996	0.035	0.106	1
ANKHD1	0.0144476	-0.762734	0.129	0.242	1
EEF1A1	0.0144899	0.540109	0.657	0.545	1
SF3B2	0.0146244	-0.500982	0.059	0.152	1
MEF2A	0.014656	0.69922	0.469	0.303	1
NFE2L1	0.0147713	1.44046	0.252	0.136	1
PRIMPOL	0.0148254	-0.643824	0.035	0.106	1
POLA2	0.0149742	-0.733692	0.035	0.106	1
SNHG5	0.0149954	-0.694908	0.052	0.136	1
UQCRB	0.0150814	-0.812751	0.105	0.212	1
ITM2A	0.0151056	0.780823	0.353	0.197	1
RPS9	0.0153187	-0.4387	0.245	0.409	1
RPS24	0.0154278	-0.933815	0.283	0.424	1
RPS7	0.0154734	0.812252	0.51	0.379	1
INPP4A	0.0154748	-0.815938	0.063	0.152	1
C17orf49	0.0156433	-0.507581	0.052	0.136	1
VKORC1L1	0.0157378	-0.608001	0.035	0.106	1
GRID1	0.0157676	-1.00498	0.045	0.121	1
ARPP21	0.0158946	-0.602124	0.035	0.106	1
TMEM144	0.0158946	-0.585402	0.035	0.106	1
FBXO25	0.016067	1.01825	0.133	0.03	1
MTHFD1L	0.0160943	-0.83075	0.063	0.152	1
DDT	0.0160996	-0.354081	0.059	0.152	1
SCAF4	0.0162122	-0.498565	0.035	0.106	1
PHF10	0.0162563	1.13798	0.108	0.015	1
DBNDD2	0.0163157	-0.543008	0.052	0.136	1
ANO2	0.0163177	0.807586	0.399	0.227	1
GRID2	0.0164532	-0.469114	0.052	0.136	1
MAN2A1	0.0165796	-0.548115	0.101	0.212	1
ICAM1	0.0166171	-0.531493	0.035	0.106	1
TALDO1	0.0166992	-0.487933	0.035	0.106	1
GAS6	0.0168419	1.23354	0.129	0.03	1
PCDH9	0.0168831	-0.956772	0.185	0.303	1
SETX	0.0169025	-0.602311	0.101	0.212	1
DLL4	0.0169802	0.740301	0.112	0.015	1
RBM4	0.016998	-0.642718	0.063	0.152	1
CHCHD10	0.0170904	-0.484813	0.07	0.167	1
BCL2L1	0.017207	0.984321	0.213	0.091	1
CBFB	0.0173988	-0.578379	0.063	0.152	1
SGK1	0.017548	-1.08803	0.045	0.121	1
ATP11A	0.0177178	0.984447	0.196	0.076	1
TRAPPC1	0.017735	-0.323385	0.07	0.167	1
CBR4	0.0177984	-0.394446	0.035	0.106	1
APP	0.0178329	0.874504	0.378	0.242	1
ANXA5	0.0178666	1.07892	0.241	0.121	1
VAMP8	0.0178856	-0.362757	0.035	0.106	1
MAP2K4	0.0179375	-0.781381	0.098	0.197	1
PUM2	0.0179832	-0.566136	0.136	0.258	1
NFIX	0.0181407	-0.965916	0.066	0.152	1
NTRK3	0.0183648	-1.14855	0.056	0.136	1
FYB1	0.0184163	-0.31993	0.035	0.106	1
LEMD3	0.0187953	-0.291534	0.052	0.136	1
FAM120B	0.0188147	-0.608718	0.084	0.182	1
EIF3K	0.018853	-0.459565	0.112	0.227	1
CCDC85B	0.0188548	0.776756	0.234	0.106	1
HIC1	0.0189489	0.984992	0.105	0.015	1
SEPTIN11	0.0190829	0.81269	0.108	0.015	1
HIGD1B	0.0191388	0.835185	0.136	0.03	1
NAA10	0.0192657	-0.319931	0.052	0.136	1
RGS5	0.0193462	0.691522	0.35	0.197	1
TNFRSF6B	0.0193692	0.571821	0.224	0.091	1
DLG2	0.0193703	-0.802808	0.273	0.379	1
GPR4	0.0196221	0.977899	0.129	0.03	1
CSGALNACT1	0.019653	0.817828	0.157	0.045	1
MBTPS1	0.0196542	0.895742	0.105	0.015	1
ZNF483	0.0196733	-0.592889	0.045	0.121	1
GLUD1	0.019773	1.15904	0.126	0.03	1
NAPA	0.0198457	-0.480002	0.045	0.121	1
IL1RL1	0.019964	1.02631	0.133	0.03	1
ZFHX3	0.0200493	-0.890154	0.126	0.242	1
NES	0.0201616	1.04415	0.15	0.045	1
FOXN3	0.0201662	-0.578734	0.248	0.379	1
DLEU2	0.0202742	-0.530296	0.189	0.318	1
PHKB	0.0203664	0.919158	0.189	0.076	1
SEMA4D	0.0203709	-0.519219	0.045	0.121	1
GRK3	0.0203709	-0.541579	0.045	0.121	1
SPARC	0.0204391	0.853189	0.283	0.152	1
TERF2IP	0.0204434	-0.415848	0.063	0.152	1
GRIK2	0.0205096	-0.921568	0.038	0.106	1
UBL3	0.0205865	-0.730668	0.077	0.167	1
SIPA1L1	0.0206522	-0.837812	0.175	0.303	1
RAB3GAP2	0.0207277	-0.715429	0.045	0.121	1
SYNJ1	0.0207277	-0.497385	0.045	0.121	1
PREPL	0.0207848	0.908382	0.15	0.045	1
GADD45GIP1	0.0208384	-0.607322	0.084	0.182	1
FNBP4	0.0208959	-0.936571	0.038	0.106	1
YTHDC2	0.0209478	-0.374835	0.073	0.167	1
ADAM15	0.0209817	0.88259	0.105	0.015	1
NR2C2	0.0210727	-0.643103	0.098	0.197	1
NCAM2	0.02136	-0.828354	0.112	0.212	1
NOTCH4	0.0213937	1.01647	0.189	0.076	1
TFRC	0.0214133	0.399852	0.238	0.106	1
QDPR	0.0215617	-0.604601	0.066	0.152	1
MMRN2	0.0215733	0.639564	0.133	0.03	1
SNRPB2	0.0217591	1.30659	0.101	0.015	1
CMTM8	0.0218407	0.843663	0.196	0.076	1
MLLT1	0.0219185	0.983464	0.101	0.015	1
RAB11B	0.0219185	1.10216	0.101	0.015	1
SLC30A1	0.0220467	1.02612	0.171	0.061	1
AC009041.2	0.022093	-1.16415	0.038	0.106	1
SPTBN1	0.0221293	0.594956	0.455	0.303	1
MLLT3	0.0221597	-0.820807	0.126	0.227	1
BCLAF1	0.0222906	-0.450856	0.084	0.182	1
KRT10	0.022425	0.915338	0.171	0.061	1
BMP2K	0.0224886	-0.451749	0.073	0.167	1
ESD	0.0224981	-0.4201	0.045	0.121	1
TRPM3	0.0225051	-0.796555	0.038	0.106	1
CD46	0.0225941	0.928868	0.262	0.136	1
CDH5	0.0225952	0.891977	0.175	0.061	1
CD34	0.02274	0.801861	0.255	0.121	1
SRSF5	0.0227975	-0.645573	0.056	0.136	1
NOVA1	0.0228501	-0.944729	0.133	0.242	1
NRCAM	0.0229238	-0.890449	0.038	0.106	1
GTF2F2	0.0229854	-0.451044	0.045	0.121	1
TBCK	0.0230468	-0.62704	0.108	0.212	1
ADIPOR2	0.0230478	0.684048	0.332	0.197	1
STX3	0.0230637	0.903309	0.101	0.015	1
EZH1	0.0231357	-0.860783	0.038	0.106	1
AC107021.1	0.023202	0.666909	0.105	0.015	1
ETS1	0.0232062	0.927106	0.255	0.136	1
BPTF	0.023487	-0.438058	0.115	0.227	1
GIMAP7	0.0236523	1.21837	0.161	0.061	1
DDX58	0.023784	-0.353613	0.045	0.121	1
UBE2E1	0.0238208	-0.616932	0.066	0.152	1
ARL15	0.0240561	0.945247	0.371	0.227	1
FAM32A	0.0241284	1.14001	0.122	0.03	1
DUSP1	0.0244143	0.91643	0.339	0.227	1
NRDC	0.0244919	-0.500819	0.126	0.242	1
SH3RF1	0.0246671	-0.623287	0.038	0.106	1
CELF2	0.0246965	-0.686993	0.199	0.333	1
TUBA1C	0.0249308	1.0834	0.122	0.03	1
CHD9	0.0250167	-0.546188	0.147	0.258	1
ERP29	0.025027	-0.310973	0.045	0.121	1
AAMDC	0.0251205	-0.556699	0.038	0.106	1
CALM3	0.0251916	-0.457454	0.126	0.242	1
SOCS4	0.0253287	0.876763	0.101	0.015	1
ARRDC1	0.0253499	-0.608948	0.038	0.106	1
HCFC1R1	0.0253499	-0.519386	0.038	0.106	1
CRIM1	0.02539	0.522137	0.381	0.212	1
ACTB	0.0254029	-0.923048	0.514	0.606	1
ZMYM6	0.0255811	-0.569838	0.038	0.106	1
JDP2	0.0255811	-0.458693	0.038	0.106	1
GRASP	0.0257562	1.04121	0.122	0.03	1
MAPKAP1	0.0264219	-0.6458	0.098	0.197	1
TBCB	0.0264225	-0.557515	0.077	0.167	1
CSMD1	0.0266554	-0.569759	0.119	0.227	1
NCKAP1	0.0267901	0.925482	0.269	0.152	1
SEC11A	0.0271505	-0.43015	0.066	0.152	1
ZBTB8OS	0.0271874	-0.474859	0.084	0.182	1
SELENOS	0.0273033	1.13239	0.14	0.045	1
ESYT2	0.0273036	0.684757	0.469	0.333	1
SYNRG	0.0273368	-0.437028	0.077	0.167	1
C11orf49	0.0274238	-0.715127	0.049	0.121	1
DAZAP2	0.0274453	-0.428016	0.066	0.152	1
SCAMP1	0.0274533	0.896788	0.143	0.045	1
BMI1	0.0274971	-0.384634	0.038	0.106	1
STARD3	0.0274971	-0.399198	0.038	0.106	1
ADGRF5	0.0278178	0.680309	0.231	0.106	1
GALNT2	0.0278427	-0.433206	0.066	0.152	1
DOCK3	0.0279427	-0.596123	0.066	0.152	1
MGST3	0.0279509	-0.289661	0.157	0.288	1
METAP1	0.0282469	-0.377175	0.038	0.106	1
GSDMD	0.0282469	-0.382447	0.038	0.106	1
NDRG1	0.0283261	1.2094	0.283	0.167	1
CCDC66	0.0283485	-0.303838	0.056	0.136	1
ZMYND8	0.0286284	0.978167	0.182	0.076	1
EVA1B	0.028806	0.676222	0.126	0.03	1
YWHAE	0.0288333	0.823541	0.371	0.258	1
ATP5MC3	0.0288563	-0.415522	0.077	0.167	1
WDR83OS	0.0288773	-0.258329	0.105	0.212	1
LAMA2	0.0289832	-0.84705	0.08	0.167	1
ECHDC2	0.029269	-0.594518	0.049	0.121	1
PSMC1	0.0295657	-0.610342	0.08	0.167	1
NCAM1	0.0298645	-0.551273	0.087	0.182	1
DOCK5	0.0299881	-0.69972	0.049	0.121	1
STK3	0.0300328	0.957231	0.217	0.106	1
PITPNC1	0.0300858	0.808786	0.301	0.182	1
SLC1A3	0.0301143	-0.411998	0.119	0.227	1
INPP4B	0.0301934	-0.873668	0.042	0.106	1
TMEM14B	0.0302008	-0.654447	0.091	0.182	1
SLC44A2	0.0304758	-0.521845	0.049	0.121	1
EIF2S2	0.0306592	1.26328	0.255	0.152	1
CDK2AP1	0.0309583	0.909073	0.14	0.045	1
C1D	0.0314718	-0.511395	0.049	0.121	1
GRINA	0.0314718	-0.466516	0.049	0.121	1
PDGFB	0.0315823	0.363811	0.322	0.167	1
NUP98	0.031619	-0.50709	0.087	0.182	1
INTS10	0.0317251	-0.349052	0.049	0.121	1
NPAS3	0.0318471	-0.794636	0.094	0.182	1
TNFSF10	0.0319801	-0.367856	0.049	0.121	1
DOCK1	0.0320482	0.708162	0.294	0.167	1
SYF2	0.0320537	0.911717	0.119	0.03	1
GNLY	0.0320685	-2.50841	0.042	0.106	1
CPT1A	0.0324573	0.883979	0.14	0.045	1
ST8SIA6-AS1	0.0325683	1.13585	0.157	0.061	1
FTX	0.0326882	-0.590669	0.427	0.53	1
PFN1	0.0329966	-0.549561	0.161	0.273	1
UBE2J2	0.033018	-0.384858	0.049	0.121	1
RPLP1	0.0330249	0.598686	0.643	0.576	1
SEPTIN2	0.0330486	-0.370162	0.147	0.273	1
KLHL22	0.0331496	-0.325379	0.049	0.121	1
ABHD15-AS1	0.0332819	-0.515146	0.049	0.121	1
OSTF1	0.0334292	-0.556096	0.07	0.152	1
HTT	0.033475	-0.501737	0.091	0.182	1
SLC5A6	0.0335257	1.12976	0.115	0.03	1
HYAL2	0.0335749	0.806093	0.203	0.091	1
GFAP	0.0345444	0.725507	0.276	0.152	1
NSF	0.0345978	-0.541842	0.07	0.152	1
RAB5IF	0.0349036	-0.272281	0.049	0.121	1
CFAP36	0.0349968	-0.770412	0.052	0.121	1
FN1	0.0351642	0.324444	0.259	0.136	1
HSP90AA1	0.035472	0.595247	0.507	0.409	1
VIM	0.0358006	0.884195	0.325	0.212	1
ATP5PD	0.0358012	-0.47538	0.07	0.152	1
HSPA8	0.0359141	0.823804	0.315	0.197	1
EPB41L4A	0.0359335	0.721235	0.22	0.106	1
EPRS	0.0361466	-0.473989	0.059	0.136	1
TRAPPC10	0.0361466	-0.396856	0.059	0.136	1
CPEB3	0.0364258	-0.677911	0.094	0.182	1
KANSL1L	0.0365423	0.913988	0.115	0.03	1
WDR37	0.0366757	-0.390999	0.059	0.136	1
SS18	0.0366757	-0.378018	0.059	0.136	1
RNF145	0.0369166	0.845875	0.178	0.076	1
PKIG	0.0370215	0.995436	0.112	0.03	1
ADIRF	0.0370567	0.762642	0.206	0.091	1
TXNL4A	0.0372114	-0.411728	0.059	0.136	1
FLII	0.0373543	-0.549735	0.042	0.106	1
SIK2	0.0373687	-0.808051	0.073	0.152	1
PPP1R16B	0.0373687	-0.813998	0.073	0.152	1
CDK2AP2	0.0375485	0.701843	0.14	0.045	1
MIAT	0.0376685	-0.62754	0.042	0.106	1
PRXL2A	0.0380757	0.793028	0.178	0.076	1
TLN1	0.0381656	0.986705	0.154	0.061	1
SCARB2	0.0382845	1.07333	0.133	0.045	1
TP53BP1	0.0383037	-0.688659	0.042	0.106	1
C2CD2	0.0384155	0.688565	0.161	0.061	1
RPS20	0.0384373	-0.404984	0.213	0.348	1
GCA	0.0386247	-0.48291	0.042	0.106	1
HLA-A	0.0386459	-0.926965	0.311	0.424	1
SYNGR2	0.0387631	-0.449166	0.101	0.197	1
LRP8	0.0389331	0.839316	0.157	0.061	1
MKNK1	0.038948	-0.484717	0.042	0.106	1
TMEM14C	0.038948	-0.543857	0.042	0.106	1
BACH1	0.0390108	-0.311309	0.14	0.258	1
NRXN3	0.0390388	-1.05838	0.122	0.212	1
TBC1D12	0.0394344	1.03579	0.185	0.091	1
RUNDC3B	0.0395204	0.70049	0.28	0.152	1
NRGN	0.0396711	0.875574	0.136	0.045	1
DUSP6	0.0403638	0.884184	0.136	0.045	1
TMEM175	0.0405991	-0.515368	0.042	0.106	1
PARN	0.0406282	-0.56159	0.052	0.121	1
RBL2	0.0406282	-0.655376	0.052	0.121	1
SLC35F5	0.0409679	-0.954155	0.077	0.152	1
MGLL	0.040984	0.637779	0.304	0.182	1
SASH1	0.0411872	0.551908	0.294	0.167	1
RPS3A	0.0412546	-0.758033	0.252	0.364	1
EIF2B1	0.041276	-0.397757	0.042	0.106	1
XRN2	0.0418161	1.10979	0.199	0.106	1
ZNF800	0.0419516	-0.821178	0.087	0.167	1
SET	0.0420233	-0.391556	0.157	0.273	1
PXK	0.04219	-0.641607	0.052	0.121	1
NFATC2	0.0423091	-0.310979	0.042	0.106	1
MKNK2	0.0424719	0.870084	0.108	0.03	1
PPIA	0.0426577	-0.416516	0.245	0.379	1
RPL12	0.0428618	-0.44128	0.192	0.318	1
COPZ1	0.04301	-0.382604	0.042	0.106	1
IRF9	0.04301	-0.313362	0.042	0.106	1
AGPAT3	0.0434074	-0.496675	0.084	0.167	1
WBP2	0.0436487	0.871012	0.112	0.03	1
RPL9	0.0437013	-0.368108	0.252	0.394	1
CBLL1	0.0437207	-0.325774	0.042	0.106	1
HS2ST1	0.0438024	-0.592102	0.052	0.121	1
AC245297.3	0.0438024	-0.398111	0.052	0.121	1
IRAK3	0.0438279	0.605099	0.234	0.121	1
TNS2	0.0442199	0.640602	0.22	0.106	1
IRF2BP2	0.0444005	0.910325	0.108	0.03	1
MIA3	0.0444413	-0.305585	0.042	0.106	1
MBD2	0.0446213	-0.640961	0.063	0.136	1
ATXN10	0.0446213	-0.476286	0.063	0.136	1
FMNL2	0.0452071	-0.563528	0.182	0.288	1
PIK3C2A	0.0453613	0.747139	0.29	0.182	1
CDK17	0.0454624	0.835615	0.224	0.121	1
EFCAB14	0.0455984	-0.493513	0.084	0.167	1
TCN2	0.0459437	0.769626	0.133	0.045	1
GTF3A	0.0461469	-0.384475	0.052	0.121	1
FGD4	0.0462736	-0.633338	0.14	0.242	1
SELENOF	0.0464128	-0.520918	0.073	0.152	1
RGS3	0.046565	0.872569	0.171	0.076	1
CHMP3	0.0466186	0.999108	0.15	0.061	1
HOOK3	0.0466468	1.146	0.164	0.076	1
SOX2-OT	0.0466677	-0.468066	0.063	0.136	1
MRPL52	0.0468284	-0.487129	0.063	0.136	1
TPM1	0.0469108	0.620735	0.273	0.167	1
LTBP1	0.0470764	-0.668769	0.056	0.121	1
PLOD2	0.0471073	0.919941	0.154	0.061	1
MGMT	0.0474756	-0.456786	0.063	0.136	1
PHYHIP	0.0480528	-0.738226	0.045	0.106	1
STAU2	0.0480542	0.744955	0.238	0.136	1
CYYR1	0.0482052	0.690631	0.112	0.03	1
ST3GAL5	0.0482398	-0.282173	0.052	0.121	1
ACVRL1	0.0483881	0.733829	0.175	0.076	1
PDCD4	0.0483919	0.998514	0.147	0.061	1
BLCAP	0.0485	0.72781	0.154	0.061	1
TANC1	0.0487304	0.715713	0.213	0.106	1
ADGRL2	0.0488167	0.534845	0.252	0.136	1
IQSEC1	0.0488927	0.911555	0.273	0.167	1
PHC2	0.0489577	-0.27442	0.101	0.197	1
SSU72	0.0491789	0.928553	0.147	0.061	1
RBFOX1	0.0492621	-0.415599	0.196	0.303	1
LRCH1	0.0492805	0.919005	0.203	0.106	1
NFIA	0.0494697	0.679326	0.297	0.182	1
SELENON	0.0496319	0.962295	0.105	0.03	1
PRRG1	0.0504547	0.632244	0.154	0.061	1
BDP1	0.0507725	-0.481531	0.073	0.152	1
ARL6IP5	0.0507817	-0.322778	0.052	0.121	1
SERF2	0.0508223	0.69864	0.51	0.394	1
ASAP1	0.0509356	0.78938	0.36	0.273	1
LASP1	0.0511597	0.566516	0.133	0.045	1
TAF1	0.0514064	-0.533247	0.108	0.197	1
RAD23B	0.0514865	-0.451747	0.084	0.167	1
USO1	0.05175	-0.399879	0.073	0.152	1
RBMS2	0.0517848	0.532179	0.276	0.152	1
SELENOP	0.0519609	0.554471	0.196	0.091	1
ATP6V0C	0.0521199	0.716161	0.301	0.197	1
CREM	0.0523344	0.751034	0.227	0.121	1
LRP1B	0.052625	-0.602543	0.133	0.227	1
TIMP3	0.0534971	0.529588	0.238	0.121	1
PIK3R3	0.0534987	0.97097	0.269	0.167	1
BGN	0.053504	0.93177	0.105	0.03	1
ARID1B	0.0535053	-0.755671	0.245	0.348	1
DOCK6	0.0536088	0.468793	0.157	0.061	1
PLSCR1	0.0536199	0.794097	0.224	0.121	1
ATP5MC2	0.054107	-0.392742	0.143	0.242	1
ELK3	0.0541308	1.04534	0.122	0.045	1
STARD8	0.0541308	0.968789	0.122	0.045	1
PSD3	0.0544322	-0.732322	0.045	0.106	1
FRMD5	0.0546077	-0.738679	0.066	0.136	1
NPAS2	0.0546368	0.630961	0.171	0.076	1
TMEM161B-AS1	0.0547173	-0.593566	0.056	0.121	1
LDHB	0.0550162	-0.603024	0.112	0.197	1
GBF1	0.0551267	-0.473414	0.098	0.182	1
LIMS2	0.0551508	0.810208	0.206	0.106	1
IL1RAP	0.0552772	-0.508641	0.045	0.106	1
UBC	0.0554729	0.55883	0.465	0.333	1
DHRSX	0.0555328	-0.679467	0.077	0.152	1
THUMPD3-AS1	0.0557037	-0.466068	0.045	0.106	1
SORT1	0.0557449	0.707908	0.371	0.273	1
NFASC	0.055889	-0.687261	0.056	0.121	1
LY6E	0.0560228	0.708339	0.241	0.136	1
ADAMTS9	0.0562747	0.439414	0.234	0.121	1
TAOK1	0.0566966	0.724724	0.199	0.106	1
SLC24A2	0.0568029	-0.988016	0.066	0.136	1
JARID2	0.056834	-0.788653	0.126	0.212	1
PPP1R12B	0.0569206	-0.697863	0.077	0.152	1
DNAJC19	0.0569999	-0.445112	0.045	0.106	1
POM121C	0.0570815	-0.56986	0.056	0.121	1
SERPINB9	0.0571539	-0.73157	0.091	0.167	1
KIAA0355	0.0572795	0.696132	0.276	0.167	1
RABAC1	0.0572984	0.839648	0.248	0.152	1
COBLL1	0.0575851	0.461313	0.378	0.227	1
NPIPB4	0.0577458	0.828355	0.182	0.091	1
EPHA4	0.0578274	0.781035	0.168	0.076	1
GTDC1	0.0579351	-0.510219	0.087	0.167	1
TMTC1	0.0581283	0.524807	0.133	0.045	1
PHF21A	0.058146	-0.419073	0.143	0.242	1
CRYBG3	0.0582625	0.725656	0.147	0.061	1
CD9	0.0584184	0.607637	0.185	0.091	1
MYO6	0.0586827	0.838038	0.164	0.076	1
EIF3E	0.0586958	-0.561986	0.077	0.152	1
STK38	0.0586959	-0.526722	0.077	0.152	1
MAGED2	0.0590564	0.516621	0.105	0.03	1
GNPTAB	0.059216	-0.446847	0.045	0.106	1
MICU2	0.059216	-0.377644	0.045	0.106	1
MGAT1	0.0593099	0.714886	0.217	0.121	1
EFR3A	0.0595301	-0.713826	0.056	0.121	1
RAPGEF5	0.0595616	0.656091	0.266	0.152	1
MDM4	0.0599794	0.837862	0.122	0.045	1
ZNF280D	0.0603368	-0.466801	0.087	0.167	1
NFKBIA	0.0604638	0.552648	0.353	0.242	1
LENG8	0.0606246	-0.504431	0.066	0.136	1
LINGO1	0.0608199	-0.597502	0.105	0.182	1
WDR70	0.060824	-0.476287	0.147	0.242	1
RHOJ	0.0608866	0.46769	0.105	0.03	1
NCDN	0.0610399	-0.418526	0.045	0.106	1
CTCF	0.0610399	-0.275445	0.045	0.106	1
DAP	0.0612234	1.01992	0.119	0.045	1
JAK2	0.0612582	-0.381731	0.077	0.152	1
CMSS1	0.061391	-0.618912	0.087	0.167	1
AKR1B1	0.0615031	-0.275447	0.045	0.106	1
SH2D3C	0.0618465	0.890139	0.178	0.091	1
KDM7A	0.0620366	0.834308	0.101	0.03	1
FCHSD2	0.0620942	-0.383204	0.196	0.303	1
NAV3	0.0622813	-0.510395	0.087	0.167	1
FAM107B	0.0623844	-0.593172	0.077	0.152	1
DSTN	0.0624191	0.604446	0.367	0.258	1
PTCD3	0.0624382	-0.412773	0.045	0.106	1
LCP2	0.0624382	-0.311445	0.045	0.106	1
PRRC2B	0.0625017	0.584784	0.227	0.121	1
SEC61G	0.0628205	-0.364291	0.087	0.167	1
DOP1A	0.0629297	-0.337088	0.056	0.121	1
TTC37	0.0630242	-0.745428	0.08	0.152	1
EXT1	0.0631822	-0.409506	0.087	0.167	1
WDR13	0.0633464	0.966312	0.119	0.045	1
CHCHD7	0.063385	-0.265723	0.045	0.106	1
PTK2B	0.0638043	-0.449467	0.056	0.121	1
CD74	0.0641847	-1.02892	0.108	0.182	1
AC079781.5	0.0642453	-0.426918	0.056	0.121	1
SCD	0.0642453	-0.354238	0.056	0.121	1
RAB31	0.0643437	-0.302294	0.045	0.106	1
TNRC18	0.0649946	-0.321405	0.108	0.197	1
ANKS1B	0.0651616	-0.653191	0.091	0.167	1
FAM155A	0.0653915	-0.741515	0.136	0.227	1
RASIP1	0.0655537	0.703138	0.101	0.03	1
MIR100HG	0.0664855	-0.670319	0.08	0.152	1
RNF38	0.0666447	-0.568173	0.091	0.167	1
TPM3	0.0668906	0.839251	0.262	0.167	1
FGD5	0.0670876	0.419643	0.126	0.045	1
ATP5MPL	0.0671351	-0.261449	0.129	0.227	1
HIF1A-AS3	0.0675829	0.445981	0.241	0.136	1
C1orf56	0.0676543	-0.467275	0.105	0.197	1
COX8A	0.0677936	-0.344203	0.14	0.242	1
BRI3	0.0680671	0.669019	0.231	0.136	1
AIG1	0.0683289	-0.3036	0.056	0.121	1
RELL1	0.0683921	0.669123	0.255	0.152	1
SNU13	0.0686419	0.784028	0.14	0.061	1
DENND5A	0.0686714	-0.47253	0.126	0.212	1
CYFIP1	0.0695766	-0.358296	0.112	0.197	1
HLA-B	0.0706552	-0.40089	0.311	0.439	1
EHBP1	0.0710181	-0.832556	0.084	0.152	1
APRT	0.071168	-0.347708	0.056	0.121	1
ZCCHC24	0.0712672	-1.10957	0.063	0.121	1
ACAT1	0.0714419	-0.792768	0.07	0.136	1
CLOCK	0.0716572	-0.454511	0.091	0.167	1
SHLD2	0.0718853	-0.626924	0.07	0.136	1
PSPC1	0.0720942	-0.661446	0.105	0.182	1
PSAP	0.0724534	-0.385075	0.294	0.409	1
A2ML1-AS1	0.0724564	0.586326	0.122	0.045	1
R3HCC1L	0.072713	-0.709728	0.059	0.121	1
LMBR1	0.0728786	0.685119	0.224	0.136	1
KLF2	0.0729848	0.864885	0.245	0.152	1
PLIN2	0.0731471	1.02571	0.136	0.061	1
SNX1	0.0733557	0.447289	0.147	0.061	1
RPS18	0.0735029	-0.313042	0.392	0.515	1
PPP4R1	0.0736657	0.725879	0.119	0.045	1
OLA1	0.0738782	-0.532796	0.08	0.152	1
FAIM2	0.0739086	-0.719981	0.07	0.136	1
ADAMTS9-AS2	0.0743827	0.473143	0.185	0.091	1
NDUFB1	0.0743876	-0.251702	0.14	0.242	1
SMTN	0.0744024	0.563038	0.101	0.03	1
MLLT10	0.074472	-0.812749	0.147	0.227	1
BAZ2A	0.0745933	-0.523567	0.07	0.136	1
CHN1	0.0752302	-0.372751	0.098	0.182	1
CLMN	0.075606	-0.622243	0.049	0.106	1
OGFR	0.075606	-0.613104	0.049	0.106	1
OGT	0.0756406	-0.670144	0.084	0.152	1
SMG6	0.0757131	-0.407433	0.122	0.212	1
LINC01184	0.0761405	-0.531769	0.059	0.121	1
MYRIP	0.076424	0.594741	0.203	0.106	1
GBE1	0.0764869	-0.589711	0.08	0.152	1
TMEM50A	0.0765379	-0.258366	0.087	0.167	1
HECTD1	0.0766134	-0.658402	0.119	0.197	1
GPCPD1	0.0767587	-0.310834	0.136	0.227	1
CREBRF	0.0769569	0.771262	0.157	0.076	1
GOPC	0.0777835	-0.421887	0.049	0.106	1
TMEM245	0.0778194	0.852265	0.115	0.045	1
LGALS1	0.0778675	0.936626	0.283	0.197	1
CERS4	0.0780592	-0.465575	0.049	0.106	1
STAT1	0.0783358	-0.417345	0.049	0.106	1
RAB1A	0.0787189	-0.387866	0.161	0.258	1
EPB41	0.0788913	-0.394286	0.049	0.106	1
STIM1	0.0788913	-0.411176	0.049	0.106	1
RC3H2	0.0791965	0.593064	0.14	0.061	1
MRTFB	0.0794343	0.822739	0.304	0.212	1
LUC7L2	0.0796353	-0.457883	0.115	0.197	1
AHNAK	0.0798732	0.685896	0.262	0.167	1
ABR	0.0802145	-0.524519	0.143	0.227	1
NASP	0.0802593	-0.383184	0.07	0.136	1
R3HDM2	0.0804542	-0.489767	0.147	0.242	1
REX1BD	0.080577	-0.383399	0.049	0.106	1
COX16	0.0812937	1.11407	0.112	0.045	1
RAMP2	0.0813311	0.549944	0.199	0.106	1
POLK	0.0814645	-0.393563	0.08	0.152	1
TAPBP	0.0814969	-0.323821	0.14	0.242	1
CEP85L	0.0817168	-0.355219	0.049	0.106	1
ORC4	0.0817919	-0.429765	0.059	0.121	1
KANK2	0.0821645	0.737744	0.119	0.045	1
SENP6	0.0822389	-0.347262	0.15	0.242	1
ARHGEF10	0.0832626	0.697362	0.196	0.106	1
CAV1	0.0832744	-0.682634	0.073	0.136	1
EEF1B2	0.0833833	-0.393847	0.112	0.197	1
CD164	0.0833909	-0.470522	0.059	0.121	1
SBDS	0.0835754	1.07149	0.112	0.045	1
SLC44A1	0.0836494	-0.421963	0.115	0.197	1
FER	0.0837035	0.948633	0.182	0.106	1
TPST2	0.0837341	0.676655	0.175	0.091	1
PPP6R2	0.0838818	-0.498474	0.129	0.212	1
DNAJA1	0.0839659	0.955633	0.245	0.167	1
ANKRD36	0.084036	-0.355344	0.049	0.106	1
GPD2	0.084036	-0.397371	0.049	0.106	1
BANF1	0.084036	-0.334812	0.049	0.106	1
TUBB	0.0843043	0.508772	0.364	0.258	1
PLPP1	0.0843321	0.672546	0.217	0.121	1
CSTB	0.0848766	0.808828	0.308	0.227	1
SKI	0.0850254	-0.43348	0.105	0.182	1
SPP1	0.0850456	-2.54615	0.115	0.182	1
LINC00513	0.0852094	0.87401	0.171	0.091	1
SUMF1	0.085771	-0.641742	0.073	0.136	1
TNFRSF1B	0.0860094	-0.361704	0.091	0.167	1
DNAJB6	0.0860206	0.675377	0.175	0.091	1
YEATS2	0.0861121	-0.441624	0.059	0.121	1
ARHGAP35	0.0863283	-0.496285	0.105	0.182	1
TMEM179B	0.0864081	-0.331122	0.049	0.106	1
CSNK2A1	0.087042	-0.638518	0.073	0.136	1
TMED9	0.0872203	-0.284312	0.059	0.121	1
EIF1	0.0873514	0.438241	0.497	0.409	1
ARRDC3	0.0874579	1.06018	0.182	0.106	1
TMEM165	0.0875462	-0.433899	0.14	0.227	1
ATP5PB	0.0883403	-0.271176	0.059	0.121	1
POU2F1	0.0884863	-0.587435	0.108	0.182	1
TAF15	0.0885545	-0.555411	0.143	0.227	1
HDAC7	0.0892614	0.506929	0.14	0.061	1
WSB1	0.0893656	-0.359825	0.206	0.318	1
SPIRE1	0.0899231	-0.771502	0.112	0.182	1
FARS2	0.089976	-0.298536	0.115	0.197	1
FOXJ3	0.0900014	-0.662399	0.084	0.152	1
SLC38A2	0.0903625	0.457218	0.266	0.167	1
EIF4A1	0.0903944	-0.356736	0.178	0.273	1
CABIN1	0.0906147	-0.285611	0.059	0.121	1
BNIP2	0.0906416	0.658679	0.115	0.045	1
ATR	0.0906788	-0.274039	0.08	0.152	1
TMX1	0.0906893	-0.254913	0.049	0.106	1
MSRB3	0.0909585	0.316457	0.119	0.045	1
AC011933.4	0.0913145	-0.314142	0.049	0.106	1
PPA1	0.0913784	0.828785	0.262	0.182	1
ZDHHC20	0.0917245	0.870739	0.112	0.045	1
PIK3C3	0.0920946	-0.38617	0.07	0.136	1
ANAPC5	0.0921565	-0.522152	0.094	0.167	1
TBK1	0.0924793	-0.644673	0.052	0.106	1
CDYL2	0.0926218	0.671922	0.21	0.121	1
SEMA6B	0.0929118	0.728706	0.154	0.076	1
CDK19	0.0930575	-0.284825	0.115	0.197	1
PLXDC2	0.0932974	-0.593935	0.122	0.197	1
GIMAP5	0.093364	0.92824	0.129	0.061	1
POLD4	0.0935233	-0.250254	0.059	0.121	1
SMARCC1	0.0939532	-0.295689	0.115	0.197	1
PIP5K1A	0.0942178	-0.620762	0.063	0.121	1
NRXN1	0.094304	-0.904011	0.101	0.167	1
NDUFA8	0.0944936	0.695219	0.112	0.045	1
DEPTOR	0.0957743	0.831306	0.112	0.045	1
AHI1	0.0958883	-0.578225	0.119	0.197	1
CST3	0.0960776	-0.596996	0.329	0.424	1
LRRTM4	0.0963803	1.01553	0.108	0.045	1
RUFY3	0.0964113	-0.471526	0.122	0.197	1
GRIN2A	0.097222	-0.657144	0.052	0.106	1
WLS	0.0973293	0.799374	0.112	0.045	1
GRIA2	0.0975451	-0.519322	0.052	0.106	1
MAML3	0.0978232	-0.315808	0.105	0.182	1
PRDM2	0.0979639	0.839863	0.108	0.045	1
RPN1	0.0979639	0.853318	0.108	0.045	1
YES1	0.0981634	0.891289	0.129	0.061	1
ID3	0.0982379	0.478871	0.28	0.182	1
TJP1	0.0986616	0.480312	0.402	0.288	1
NUTM2B-AS1	0.0989045	0.592827	0.112	0.045	1
TOX	0.0997455	-0.698048	0.073	0.136	1
SCFD2	0.0997456	-0.804671	0.073	0.136	1
TTC28	0.0999039	0.650491	0.192	0.106	1
MRPL57	0.100184	-0.542255	0.063	0.121	1
UQCRH	0.100263	-0.284754	0.105	0.182	1
FOXP1	0.100803	0.390198	0.371	0.273	1
AC018816.1	0.101036	0.677085	0.112	0.045	1
MXD4	0.101252	0.61263	0.133	0.061	1
MARCH7	0.10145	0.534917	0.154	0.076	1
AC114757.1	0.102414	0.749989	0.15	0.076	1
LRRFIP1	0.102429	0.353762	0.192	0.106	1
PLCL1	0.103416	-0.767341	0.077	0.136	1
POLR2L	0.103544	0.765972	0.262	0.182	1
CEMIP2	0.103698	0.744518	0.28	0.197	1
KPNA3	0.103773	-0.298976	0.094	0.167	1
AP2B1	0.103804	0.621453	0.255	0.167	1
PERP	0.104507	0.860458	0.108	0.045	1
CCND2	0.104548	0.844159	0.126	0.061	1
MAPK8	0.104857	-0.600983	0.098	0.167	1
RPRD1A	0.104888	0.340323	0.157	0.076	1
MED15	0.105171	-0.37527	0.063	0.121	1
PRRC2C	0.105796	0.3888	0.245	0.152	1
SLC25A3	0.105801	-0.250642	0.105	0.182	1
C1orf43	0.106248	-0.442264	0.052	0.106	1
SLC12A2	0.106254	0.645618	0.15	0.076	1
ERC1	0.10644	-0.404785	0.262	0.348	1
KIF13A	0.106671	-0.638281	0.126	0.197	1
PIK3CB	0.106781	-0.3867	0.073	0.136	1
IL1RAPL1	0.106874	-0.827324	0.133	0.197	1
ACSL5	0.107368	0.78742	0.164	0.091	1
FAM133B	0.107384	-0.353889	0.073	0.136	1
STX8	0.108378	-0.4767	0.108	0.182	1
RPL7A	0.109613	-0.472632	0.311	0.409	1
SPATS2L	0.109756	0.713415	0.147	0.076	1
SUCLG2	0.109932	-0.566948	0.087	0.152	1
SLC20A2	0.109956	0.366156	0.157	0.076	1
WASHC1	0.110014	-0.666961	0.066	0.121	1
WAPL	0.110443	-0.300702	0.073	0.136	1
LPGAT1	0.110467	-0.345267	0.052	0.106	1
NCOA6	0.110467	-0.406103	0.052	0.106	1
RABGAP1L	0.110487	-0.374011	0.227	0.333	1
MCPH1	0.110708	0.629705	0.15	0.076	1
URGCP	0.111014	-0.354743	0.063	0.121	1
CCAR1	0.111062	-0.285182	0.073	0.136	1
ANKS1A	0.11148	0.477863	0.329	0.227	1
RNF213	0.111583	-0.686622	0.14	0.212	1
TULP4	0.111685	-0.26271	0.073	0.136	1
C1orf122	0.111902	-0.503185	0.052	0.106	1
PSMB10	0.111902	-0.347125	0.052	0.106	1
AKT3	0.112187	-0.484275	0.336	0.455	1
LDLR	0.112626	-0.595912	0.066	0.121	1
MRPS5	0.113692	-0.379267	0.063	0.121	1
H1FX	0.113766	0.717079	0.108	0.045	1
PI4KA	0.113776	-0.533425	0.164	0.242	1
SSH2	0.113875	-0.586024	0.182	0.258	1
STK25	0.114082	-0.255234	0.052	0.106	1
PPP1CC	0.114369	-0.309972	0.063	0.121	1
PTPRK	0.114466	0.579021	0.294	0.197	1
MT3	0.1145	-0.607563	0.231	0.318	1
KANK3	0.114616	0.656824	0.164	0.091	1
SOX5	0.115036	-0.782735	0.196	0.273	1
SELENOK	0.115112	0.546912	0.164	0.091	1
EMCN	0.115158	0.432912	0.154	0.076	1
MT1G	0.11531	0.634207	0.15	0.076	1
WASF2	0.115699	0.533628	0.259	0.167	1
AFDN	0.116345	0.555879	0.227	0.136	1
MPDZ	0.11698	0.464895	0.168	0.091	1
MOB1A	0.117042	-0.265644	0.052	0.106	1
SRGAP2	0.117893	-0.258127	0.157	0.242	1
NDUFB11	0.118064	-0.267826	0.073	0.136	1
SLC38A5	0.118595	0.581326	0.147	0.076	1
SNX25	0.118631	0.607029	0.108	0.045	1
STEAP1B	0.11879	0.854958	0.126	0.061	1
CTNND1	0.119007	0.541495	0.28	0.212	1
SF3B6	0.119373	-0.27607	0.073	0.136	1
NRG3	0.120142	-0.669161	0.129	0.197	1
C22orf34	0.120211	0.658646	0.147	0.076	1
EIF3H	0.120497	0.518889	0.108	0.045	1
PCMT1	0.120668	-0.424814	0.087	0.152	1
SPOCK3	0.120945	0.688036	0.164	0.091	1
ABCA1	0.121457	0.343338	0.185	0.106	1
SNX14	0.121467	-0.586736	0.115	0.182	1
EIF4EBP2	0.121655	0.912762	0.122	0.061	1
NLGN1	0.121777	-0.921043	0.08	0.136	1
EEF1G	0.122282	-0.343662	0.161	0.242	1
MT-ND4	0.122626	0.495527	0.406	0.348	1
DNAJC8	0.123069	1.05284	0.154	0.091	1
SNED1	0.123424	0.647734	0.105	0.045	1
TPD52L1	0.123569	-0.50434	0.066	0.121	1
TRAK2	0.123658	0.505682	0.108	0.045	1
PLEKHG1	0.124024	0.531139	0.325	0.227	1
AGAP1	0.124072	-0.591447	0.192	0.273	1
USP46	0.124279	-0.502303	0.066	0.121	1
GOLM1	0.124636	-0.568447	0.066	0.121	1
DPP10	0.125185	-0.891964	0.105	0.167	1
TMCO1	0.125255	0.636154	0.126	0.061	1
AP2A2	0.125314	0.704224	0.143	0.076	1
PRMT2	0.125404	0.726552	0.332	0.273	1
EGFR	0.126285	0.634089	0.147	0.076	1
PITPNA	0.128014	0.672292	0.105	0.045	1
ATP5F1D	0.128063	-0.328454	0.112	0.182	1
PRKAR1A	0.128428	0.742028	0.157	0.091	1
ZEB1	0.128505	0.344084	0.325	0.227	1
PPP2CB	0.128881	-0.468915	0.122	0.197	1
MAPK1IP1L	0.129571	-0.34529	0.087	0.152	1
AP3B1	0.129571	-0.366042	0.087	0.152	1
RSBN1L	0.129571	-0.3409	0.087	0.152	1
AKT2	0.129842	-0.606185	0.056	0.106	1
RAN	0.130226	-0.411346	0.087	0.152	1
DCP1A	0.130819	-0.428507	0.066	0.121	1
PTOV1	0.131372	0.646661	0.105	0.045	1
INTS1	0.13224	-0.529903	0.056	0.106	1
DSCAML1	0.13224	-0.669987	0.056	0.106	1
NOTCH1	0.132735	0.52316	0.105	0.045	1
USP14	0.133057	-0.446224	0.066	0.121	1
GABARAP	0.133142	-0.262064	0.171	0.258	1
GPI	0.133294	-0.452945	0.14	0.212	1
SERINC1	0.133325	0.722943	0.192	0.121	1
PRKD3	0.133459	0.694661	0.157	0.091	1
CREBBP	0.133825	0.467526	0.161	0.091	1
TMEM184B	0.133825	0.604531	0.161	0.091	1
RPL31	0.134676	-0.26616	0.171	0.258	1
JUNB	0.135471	0.786929	0.175	0.106	1
FANCL	0.136313	-0.43459	0.056	0.106	1
TUBB2A	0.136313	-0.403054	0.056	0.106	1
APLP1	0.137139	-0.384069	0.056	0.106	1
SLC3A2	0.137486	0.509994	0.266	0.182	1
TBC1D4	0.137506	0.49387	0.311	0.212	1
DMTF1	0.137944	-0.285078	0.087	0.152	1
GFOD1	0.138224	0.606535	0.143	0.076	1
PIAS2	0.138686	0.852855	0.171	0.106	1
SORBS3	0.139073	0.749481	0.14	0.076	1
RPGR	0.139128	0.600871	0.178	0.106	1
JCAD	0.139484	0.581817	0.213	0.136	1
SSBP3	0.139611	-0.662006	0.07	0.121	1
TOM1L2	0.139641	-0.408214	0.056	0.106	1
TJP2	0.139741	0.370891	0.108	0.045	1
STAU1	0.139924	-1.02495	0.094	0.152	1
MCF2L	0.140221	0.681611	0.252	0.182	1
BTG1	0.140419	0.935727	0.199	0.136	1
FAM168B	0.140731	-0.300133	0.066	0.121	1
TSPAN14	0.14093	0.700265	0.224	0.152	1
MTREX	0.141258	0.769883	0.119	0.061	1
MYH9	0.141586	0.399107	0.301	0.227	1
GCNT1	0.141747	0.637028	0.101	0.045	1
RPL19	0.1418	-0.65541	0.318	0.364	1
COG5	0.141917	0.442366	0.143	0.076	1
CALD1	0.142317	0.485448	0.315	0.227	1
GGT5	0.142492	0.562781	0.161	0.091	1
CERK	0.144284	0.478897	0.126	0.061	1
RASAL2	0.144534	0.425792	0.294	0.197	1
LUZP1	0.14458	0.62956	0.157	0.091	1
ECI2	0.144689	0.59129	0.101	0.045	1
EIF2AK2	0.145679	0.625167	0.14	0.076	1
HSP90AB1	0.145806	0.607179	0.462	0.409	1
TRIM44	0.145934	-0.29733	0.112	0.182	1
H2AFY	0.146303	-0.299205	0.066	0.121	1
PALMD	0.147069	0.456396	0.178	0.106	1
IFNAR1	0.147311	0.614904	0.248	0.182	1
ASCC3	0.14732	-0.334797	0.101	0.167	1
FKBP1A	0.147626	0.636569	0.297	0.227	1
PRKD1	0.147708	0.345206	0.105	0.045	1
SULF2	0.147896	0.498888	0.161	0.091	1
SMAP2	0.147925	-0.621947	0.066	0.121	1
SNX13	0.148002	-0.469112	0.101	0.167	1
BTRC	0.148291	-0.364419	0.14	0.212	1
UBAP1	0.148431	0.642265	0.101	0.045	1
HPCAL1	0.148452	0.388968	0.105	0.045	1
LGALS3	0.14887	0.587046	0.21	0.136	1
CSNK1A1	0.149284	0.440542	0.297	0.227	1
SERINC5	0.149987	0.42452	0.178	0.106	1
NFKB1	0.150603	-0.263185	0.077	0.136	1
ACER2	0.150828	0.504374	0.143	0.076	1
BBX	0.151133	-0.508727	0.091	0.152	1
BCL6	0.151478	-0.404404	0.08	0.136	1
TXNIP	0.152541	-0.532445	0.14	0.212	1
RPS25	0.153963	-0.64599	0.304	0.379	1
SELENOW	0.154289	0.457329	0.458	0.364	1
HNRNPH3	0.154484	0.514799	0.157	0.091	1
UBE2D2	0.1548	-0.339588	0.091	0.152	1
LINC01278	0.154962	-0.504965	0.08	0.136	1
RAPGEF1	0.155134	0.562933	0.294	0.212	1
PRKD2	0.155597	-0.421933	0.07	0.121	1
SVIP	0.156137	0.566805	0.101	0.045	1
PIAS1	0.156508	-1.16369	0.164	0.227	1
STXBP6	0.156924	0.495385	0.101	0.045	1
SIPA1L3	0.158386	-0.632993	0.084	0.136	1
PTPN11	0.158883	0.581505	0.119	0.061	1
NIBAN2	0.160102	0.589265	0.101	0.045	1
KANSL1	0.160398	-0.262994	0.252	0.348	1
DAB2IP	0.160442	0.507243	0.213	0.136	1
PHF20	0.161381	0.775	0.115	0.061	1
AKAP8L	0.162366	-0.445783	0.07	0.121	1
STXBP1	0.162886	0.372221	0.182	0.106	1
SMIM3	0.163328	0.376856	0.101	0.045	1
G3BP2	0.163656	-0.459983	0.094	0.152	1
BCAP31	0.164689	0.625018	0.154	0.091	1
AGAP3	0.164745	-0.725216	0.084	0.136	1
EFR3B	0.165047	0.351911	0.161	0.091	1
BHLHE41	0.165064	-0.525417	0.059	0.106	1
MIF	0.165472	0.42905	0.392	0.303	1
ANAPC10	0.166001	-0.481387	0.059	0.106	1
FOXK2	0.166069	-0.569267	0.108	0.167	1
CLIP1	0.166167	-0.590707	0.161	0.227	1
FAM219A	0.166381	0.508123	0.119	0.061	1
ARAP2	0.166571	-0.27862	0.101	0.167	1
SH3GL1	0.166728	0.707848	0.115	0.061	1
ANXA3	0.167112	0.648757	0.189	0.121	1
TRIO	0.167372	0.727773	0.381	0.333	1
SUMO2	0.167502	0.696932	0.115	0.061	1
CCSER2	0.168671	0.649528	0.185	0.121	1
MAP4K3-DT	0.169092	0.35868	0.101	0.045	1
ZNF106	0.169345	0.672247	0.133	0.076	1
WWOX	0.169742	-0.344018	0.259	0.348	1
PFKL	0.170228	0.437476	0.119	0.061	1
GAPVD1	0.170245	-0.349085	0.07	0.121	1
NRP1	0.171065	0.619699	0.136	0.076	1
LRRFIP2	0.171608	0.342179	0.101	0.045	1
DTNBP1	0.171707	-0.390805	0.059	0.106	1
SNHG25	0.17179	-0.261466	0.203	0.288	1
CSE1L	0.172672	-0.415425	0.059	0.106	1
CALCRL	0.173036	0.642431	0.133	0.076	1
MAFK	0.173036	0.618648	0.133	0.076	1
HIBCH	0.173641	-0.529101	0.059	0.106	1
EIF4E	0.173641	-0.432472	0.059	0.106	1
KIF5B	0.173957	0.869481	0.175	0.121	1
IPO7	0.174933	0.483588	0.119	0.061	1
TSC22D3	0.175	0.524311	0.154	0.091	1
ZBTB38	0.175133	0.447037	0.241	0.167	1
MYO9B	0.176061	-0.482645	0.119	0.182	1
ADGRG1	0.177	0.886578	0.178	0.121	1
UBE2R2	0.177733	0.479763	0.136	0.076	1
PNRC1	0.17785	0.34125	0.14	0.076	1
CYSTM1	0.178171	0.46131	0.175	0.106	1
SUGP2	0.178407	-0.313846	0.07	0.121	1
SLC1A1	0.178468	0.399161	0.192	0.121	1
TSG101	0.178548	-0.311131	0.059	0.106	1
OPTN	0.178812	0.785371	0.129	0.076	1
ATP5ME	0.179017	0.808217	0.343	0.303	1
UBA52	0.17984	0.559856	0.385	0.318	1
SRSF3	0.179856	-0.395863	0.094	0.152	1
PHLDB1	0.180266	0.522193	0.115	0.061	1
LCOR	0.180331	-0.264642	0.154	0.227	1
FBXO34	0.180614	-0.564486	0.084	0.136	1
FOSL2	0.180818	0.779886	0.199	0.136	1
LINC01578	0.181241	-0.298501	0.119	0.182	1
PRICKLE2	0.181403	0.460785	0.192	0.121	1
FXR1	0.182448	0.672729	0.227	0.167	1
RPL23A	0.182566	-0.841735	0.336	0.409	1
ARL6IP4	0.182694	-0.348205	0.108	0.167	1
TUBA1A	0.182739	-0.250967	0.126	0.197	1
MBNL1	0.18293	-0.57596	0.402	0.485	1
NRP2	0.183567	0.578253	0.115	0.061	1
PIP4K2A	0.183954	-0.535341	0.129	0.197	1
ATG7	0.184563	-0.342063	0.147	0.212	1
BAZ2B	0.184834	0.305002	0.227	0.152	1
ITM2B	0.184962	0.457971	0.399	0.348	1
C11orf58	0.185753	0.640678	0.112	0.061	1
PSIP1	0.186033	0.535689	0.133	0.076	1
ATRN	0.18634	-0.649164	0.063	0.106	1
PWWP3A	0.186602	0.740751	0.112	0.061	1
G3BP1	0.18664	-0.329221	0.108	0.167	1
ADGRB3	0.187535	-0.456288	0.098	0.152	1
KBTBD2	0.187626	-0.383339	0.084	0.136	1
STMN2	0.187638	-0.30235	0.059	0.106	1
SAT2	0.187638	-0.335352	0.059	0.106	1
MYL12B	0.187824	0.696316	0.311	0.258	1
AMD1	0.188235	-0.371866	0.108	0.167	1
MYO9A	0.188306	0.403837	0.168	0.106	1
PPP3CC	0.188502	0.443517	0.224	0.152	1
NOSTRIN	0.188502	-0.422885	0.15	0.212	1
DDIT4	0.188726	0.435555	0.192	0.121	1
ZNF292	0.18902	0.455017	0.168	0.106	1
KAT2B	0.189451	-0.25875	0.094	0.152	1
ABHD17A	0.190185	0.587641	0.182	0.121	1
PPP2R2A	0.191174	0.585126	0.168	0.106	1
ITPR2	0.191339	-0.2589	0.15	0.227	1
CLSTN1	0.191639	-0.456555	0.164	0.227	1
MTR	0.192063	-0.465866	0.073	0.121	1
PXN	0.19302	0.777071	0.161	0.106	1
S100A13	0.193162	0.933311	0.108	0.061	1
NKAIN2	0.193468	-0.477627	0.063	0.106	1
FTH1	0.19378	-0.669454	0.601	0.576	1
PARD3B	0.193988	-0.47339	0.073	0.121	1
KIF16B	0.19554	-0.57782	0.063	0.106	1
CUL1	0.195764	-0.394335	0.136	0.197	1
FCHO2	0.195892	0.49949	0.15	0.091	1
NUCB2	0.196449	0.332482	0.133	0.076	1
RDX	0.196688	0.514907	0.266	0.197	1
CCDC50	0.197068	0.668699	0.196	0.136	1
DPYSL2	0.198301	0.502653	0.311	0.242	1
TSHZ2	0.199667	0.324076	0.189	0.121	1
PTPN12	0.199686	0.354902	0.238	0.167	1
A2M	0.199974	0.57751	0.472	0.424	1
SEM1	0.200062	-0.424214	0.133	0.197	1
IL13RA1	0.200567	-0.424615	0.112	0.167	1
STAT5B	0.200593	0.555084	0.112	0.061	1
TBC1D8	0.200837	-0.365057	0.073	0.121	1
PTPRD	0.20088	-0.567846	0.14	0.197	1
MARK3	0.201141	-0.485872	0.178	0.242	1
NONO	0.20131	-0.264232	0.084	0.136	1
SLC22A23	0.201778	-0.275722	0.084	0.136	1
PAIP2	0.202183	0.327941	0.136	0.076	1
DNAJC3	0.202205	0.564715	0.129	0.076	1
RORA	0.203081	-0.794104	0.262	0.318	1
NPIPB5	0.20342	0.419683	0.115	0.061	1
ACTN4	0.203623	0.382237	0.325	0.242	1
CRADD	0.203897	0.565365	0.129	0.076	1
DTNA	0.20483	-0.322716	0.073	0.121	1
ARID4B	0.205216	-0.464566	0.21	0.288	1
CDC37	0.205294	0.480028	0.185	0.121	1
SDCBP	0.205329	0.535402	0.252	0.197	1
P4HA1	0.205833	0.752678	0.192	0.136	1
ATP1B1	0.20599	-0.431698	0.087	0.136	1
BCAP29	0.20612	0.322742	0.115	0.061	1
BBS9	0.206619	-0.375222	0.304	0.364	1
SRP19	0.206847	-0.354106	0.073	0.121	1
BICD1	0.206862	-0.454176	0.112	0.167	1
GOLGB1	0.207776	-0.436146	0.063	0.106	1
RAP1A	0.208195	-0.261322	0.192	0.273	1
ZNF248	0.208879	-0.372083	0.073	0.121	1
AC087854.1	0.20903	0.59263	0.196	0.136	1
STXBP5	0.211348	-0.498645	0.101	0.152	1
DNM2	0.211798	0.590074	0.252	0.197	1
CBLB	0.212658	-0.501969	0.122	0.182	1
FSTL1	0.214295	0.598211	0.108	0.061	1
CDK8	0.214932	-0.387565	0.063	0.106	1
WBP1L	0.214932	-0.416721	0.063	0.106	1
TGFBR2	0.215072	0.420445	0.273	0.197	1
AC023509.6	0.215251	0.632113	0.108	0.061	1
PKP4	0.21688	0.539307	0.217	0.152	1
ZFYVE28	0.217263	0.774906	0.14	0.091	1
WWC2	0.217787	0.467111	0.269	0.197	1
ZHX3	0.218461	-0.409112	0.087	0.136	1
MDH1	0.219256	-0.453591	0.073	0.121	1
TLE5	0.21967	0.539317	0.245	0.182	1
PRRC2A	0.220314	-0.262903	0.073	0.121	1
RPS19BP1	0.220573	0.750605	0.122	0.076	1
MMP24OS	0.22092	0.896419	0.105	0.061	1
GPATCH8	0.22102	-0.319145	0.126	0.182	1
H2AFJ	0.223897	0.7853	0.105	0.061	1
CCNL1	0.225898	0.652858	0.105	0.061	1
LARP1	0.226727	0.660521	0.143	0.091	1
APPBP2	0.227445	-0.322154	0.063	0.106	1
PHF2	0.228608	-0.63841	0.063	0.106	1
IMMP2L	0.228959	-0.279362	0.217	0.288	1
RASSF3	0.230346	0.733025	0.14	0.091	1
SP100	0.230368	0.436813	0.182	0.121	1
CHST15	0.230522	0.475224	0.129	0.076	1
KMT2A	0.231747	0.593662	0.157	0.106	1
VPS13D	0.232433	-0.414428	0.129	0.182	1
MOB3B	0.235004	0.486854	0.108	0.061	1
GAS5	0.235673	-0.356355	0.063	0.106	1
YAP1	0.237346	0.511233	0.126	0.076	1
ACACB	0.237678	-0.563047	0.066	0.106	1
GCC2	0.238019	-0.28282	0.126	0.182	1
AC019197.1	0.239264	0.593131	0.126	0.076	1
KCNIP4	0.239375	-0.467115	0.199	0.258	1
ARF1	0.239422	0.711064	0.199	0.152	1
FYTTD1	0.24026	0.623191	0.105	0.061	1
PLAAT3	0.241617	-0.308806	0.126	0.182	1
ATF2	0.242891	-0.27096	0.087	0.136	1
ST13	0.243246	0.773756	0.182	0.136	1
FAM117B	0.2443	0.519156	0.108	0.061	1
PEA15	0.245739	0.781022	0.199	0.152	1
USP6NL	0.246962	0.336328	0.164	0.106	1
NSD1	0.247086	-0.375591	0.126	0.182	1
SERPINB6	0.247488	0.365349	0.283	0.212	1
FAM177A1	0.247678	0.651169	0.105	0.061	1
NEBL	0.248148	0.475056	0.276	0.212	1
EIF4G2	0.24891	0.606806	0.22	0.167	1
MOSMO	0.249018	0.420314	0.126	0.076	1
STK4	0.249555	-0.34484	0.077	0.121	1
PKN3	0.249574	0.438071	0.108	0.061	1
VWA8	0.250862	-0.427734	0.066	0.106	1
TMCC3	0.250906	0.580097	0.105	0.061	1
POGZ	0.251617	-0.270925	0.101	0.152	1
GLUL	0.251913	-0.533503	0.147	0.197	1
SRP14	0.252086	0.302829	0.36	0.303	1
UBE2J1	0.253313	0.311156	0.108	0.061	1
N4BP2L1	0.254545	-0.285812	0.066	0.106	1
OXR1	0.254943	-0.354633	0.161	0.227	1
HERC2	0.255619	0.435226	0.311	0.258	1
PJA2	0.255878	0.400396	0.143	0.091	1
MRPS21	0.256008	-0.456726	0.091	0.136	1
SPCS2	0.257245	0.651876	0.185	0.136	1
SMARCA5	0.257691	0.702221	0.101	0.061	1
TPI1	0.258121	0.67034	0.227	0.182	1
RPS27L	0.258168	0.52489	0.14	0.091	1
RPS27A	0.258274	-0.488061	0.43	0.455	1
GATAD2A	0.258979	0.466157	0.122	0.076	1
FAM13A	0.259374	0.516105	0.185	0.136	1
UFSP2	0.259656	0.540631	0.105	0.061	1
C5orf24	0.259858	0.694258	0.119	0.076	1
STK39	0.261457	0.309172	0.108	0.061	1
TRPM7	0.261457	-0.371838	0.091	0.136	1
YTHDC1	0.26155	0.283924	0.129	0.076	1
MT-ND2	0.261852	0.277443	0.367	0.288	1
UBE2W	0.262206	-0.455476	0.115	0.167	1
CASC4	0.26231	-0.262722	0.077	0.121	1
DCAF6	0.263201	-0.312163	0.115	0.167	1
XAF1	0.264047	0.694288	0.119	0.076	1
KLC1	0.264943	0.481137	0.21	0.152	1
COX5B	0.265164	0.451404	0.266	0.212	1
PKD2	0.265914	-0.553833	0.08	0.121	1
COMMD1	0.266604	-0.533964	0.133	0.182	1
CHMP5	0.266725	0.634976	0.101	0.061	1
OMD	0.266766	0.641166	0.122	0.076	1
TBCD	0.267612	0.362259	0.231	0.167	1
VCL	0.2681	-0.427578	0.091	0.136	1
RAMP3	0.268267	-0.630928	0.08	0.121	1
CTTNBP2NL	0.268365	0.66195	0.136	0.091	1
MPRIP	0.268512	0.348212	0.161	0.106	1
ANKRD11	0.268706	0.49448	0.29	0.242	1
ZNF638	0.26883	-0.554176	0.206	0.258	1
TRPS1	0.269219	-0.347363	0.091	0.136	1
PICALM	0.269437	0.483572	0.42	0.379	1
ZFYVE16	0.270169	0.65324	0.101	0.061	1
PDE8A	0.270382	-0.253474	0.14	0.197	1
ANK2	0.270402	-0.324866	0.122	0.182	1
MRTFA	0.270652	0.287871	0.196	0.136	1
MAST4	0.272045	0.382414	0.122	0.076	1
NGLY1	0.272565	0.556452	0.119	0.076	1
ITSN1	0.273552	-0.462212	0.108	0.152	1
PSME4	0.273725	-0.306886	0.091	0.136	1
BTBD9	0.274412	-0.449532	0.119	0.167	1
MAGI3	0.276014	-0.516387	0.08	0.121	1
EFHD2	0.276123	-0.287024	0.066	0.106	1
RICTOR	0.276304	0.465688	0.168	0.121	1
MAPK3	0.277147	0.498679	0.101	0.061	1
CACYBP	0.27743	-0.261887	0.066	0.106	1
ETNK1	0.277704	0.532119	0.15	0.106	1
OTUD7B	0.279034	-0.305742	0.08	0.121	1
SOX18	0.279523	0.5902	0.136	0.091	1
RPL36A	0.279581	-0.327606	0.213	0.273	1
NFATC3	0.281451	-0.569217	0.15	0.197	1
LRP1	0.281733	-0.421113	0.091	0.136	1
PLEKHA1	0.282371	0.552415	0.119	0.076	1
TSPYL2	0.282447	0.357895	0.105	0.061	1
CADM2	0.283394	-0.663153	0.189	0.227	1
EXOC6B	0.284577	0.390384	0.283	0.227	1
DICER1	0.284582	0.592646	0.119	0.076	1
RNF19A	0.285146	0.36914	0.255	0.197	1
TRAK1	0.285331	-0.459004	0.108	0.152	1
SUPT3H	0.287609	-0.462525	0.08	0.121	1
TRIOBP	0.287843	0.478448	0.101	0.061	1
PPP1CA	0.287843	0.398295	0.101	0.061	1
CHURC1	0.288723	-0.251209	0.091	0.136	1
MT-ND5	0.288759	0.532492	0.199	0.152	1
RPS14	0.289284	0.613278	0.378	0.348	1
TGOLN2	0.289617	0.583564	0.15	0.106	1
RHOC	0.290404	0.259798	0.206	0.152	1
PAK2	0.290714	0.285017	0.203	0.152	1
CTIF	0.291881	-0.382553	0.094	0.136	1
CARHSP1	0.292419	0.320849	0.14	0.091	1
PTEN	0.292727	-0.333026	0.154	0.212	1
UBE2N	0.293215	-0.291779	0.08	0.121	1
RBFOX2	0.293525	0.460174	0.283	0.227	1
MAP1B	0.294407	0.291877	0.294	0.227	1
MICAL3	0.294676	0.452766	0.119	0.076	1
ZC3H15	0.295126	0.427342	0.101	0.061	1
KIDINS220	0.297563	-0.28334	0.157	0.212	1
RPL37	0.299123	-0.26062	0.388	0.439	1
MAP3K20	0.299239	0.395524	0.119	0.076	1
TMEM30A	0.29953	0.437425	0.136	0.091	1
PPP3R1	0.299544	-0.762475	0.098	0.136	1
LSR	0.300049	0.39759	0.101	0.061	1
CLTB	0.300165	-0.255359	0.08	0.121	1
YPEL3	0.300387	0.474567	0.119	0.076	1
STX18	0.301176	-0.459827	0.07	0.106	1
HEG1	0.301664	0.498508	0.185	0.136	1
SNX6	0.301869	0.492619	0.15	0.106	1
ATP7B	0.30191	0.415089	0.101	0.061	1
DNAJC1	0.302463	-0.421184	0.175	0.227	1
RPL26	0.303362	0.576552	0.332	0.288	1
XKR6	0.303514	0.592697	0.133	0.091	1
BNIP3L	0.305714	0.548662	0.133	0.091	1
NCL	0.305996	-0.327021	0.171	0.227	1
PSMB1	0.307617	0.399691	0.108	0.167	1
GPM6B	0.307915	-0.306786	0.122	0.167	1
SLC16A6	0.308796	0.394887	0.101	0.061	1
DPP6	0.310101	-0.284608	0.07	0.106	1
HNRNPF	0.310434	0.379356	0.136	0.091	1
SMARCA2	0.31149	-0.414961	0.21	0.258	1
CCDC186	0.312596	0.296565	0.101	0.061	1
SPTAN1	0.312643	0.299138	0.192	0.136	1
SNRK	0.312939	0.450129	0.133	0.091	1
PDXDC1	0.313196	0.283205	0.217	0.167	1
JAM2	0.313361	-0.282416	0.108	0.152	1
PPHLN1	0.31358	-0.367162	0.07	0.106	1
SPECC1L	0.313756	0.31405	0.136	0.091	1
RPS15	0.313839	-0.435135	0.462	0.47	1
PDCD6IP	0.31393	0.439683	0.15	0.106	1
MIGA1	0.314845	-0.482838	0.084	0.121	1
PPM1H	0.315378	-0.551524	0.101	0.136	1
FGFR1	0.315577	0.442212	0.119	0.076	1
PBRM1	0.316843	-0.501589	0.108	0.152	1
ZBTB20	0.317627	0.351008	0.395	0.348	1
LAMP2	0.317786	0.404061	0.115	0.076	1
SENP7	0.320055	-0.275689	0.084	0.121	1
KAZN	0.320131	-0.378843	0.136	0.182	1
PTBP2	0.321415	0.440224	0.133	0.091	1
UPP1	0.321415	0.488289	0.133	0.091	1
FAM172A	0.321508	-0.358787	0.178	0.227	1
GRK5	0.322033	-0.331017	0.07	0.106	1
ZFPM2	0.322253	-0.506757	0.157	0.197	1
DNMT1	0.322413	0.691823	0.112	0.076	1
GUK1	0.323325	0.667604	0.248	0.212	1
SNHG14	0.323466	-0.422074	0.301	0.364	1
SDF4	0.323674	-0.263984	0.08	0.121	1
PIN1	0.324883	-0.284686	0.07	0.106	1
ACAP2	0.325173	0.372643	0.234	0.182	1
ZYG11B	0.325178	-0.515083	0.073	0.106	1
MAP3K8	0.32775	-0.286217	0.07	0.106	1
SQSTM1	0.327815	0.451887	0.248	0.197	1
DLC1	0.329731	-0.443836	0.245	0.288	1
PGM5	0.330229	0.287823	0.066	0.106	1
HSBP1	0.330377	0.492549	0.147	0.106	1
SRP9	0.330442	0.500877	0.129	0.091	1
HSPA5	0.330682	0.268951	0.122	0.182	1
C4orf3	0.332868	0.399404	0.231	0.182	1
GLS	0.33329	-0.674475	0.164	0.212	1
RUFY2	0.333327	-0.528517	0.084	0.121	1
ARIH1	0.333959	0.37932	0.185	0.136	1
IER2	0.333971	0.461926	0.129	0.091	1
FNDC3B	0.334186	-0.494381	0.21	0.258	1
LEF1	0.334578	0.393453	0.189	0.136	1
ELMO1	0.33521	-0.440156	0.241	0.288	1
RBPJ	0.335298	-0.366737	0.136	0.182	1
AEBP2	0.337377	-0.325922	0.084	0.121	1
NRIP1	0.338063	-0.327979	0.098	0.136	1
PREX2	0.338398	0.436	0.182	0.136	1
HMBOX1	0.341576	0.484827	0.147	0.106	1
PLEC	0.341577	0.467167	0.147	0.106	1
INO80D	0.344099	-0.434394	0.087	0.121	1
TNFAIP1	0.345102	0.529994	0.112	0.076	1
CTNNA2	0.345699	-0.543952	0.101	0.136	1
TMED10	0.346299	-0.278137	0.133	0.182	1
LAMC1	0.346813	-0.433553	0.087	0.121	1
PDSS2	0.346949	-0.358915	0.084	0.121	1
NLK	0.347662	0.381344	0.196	0.152	1
CCNI	0.348036	0.745723	0.168	0.136	1
ALDH2	0.348187	-0.428557	0.073	0.106	1
PTPN1	0.348246	0.631321	0.126	0.091	1
AC118549.1	0.348331	-0.291487	0.084	0.121	1
MFSD4B	0.348959	-0.295411	0.094	0.136	1
TMEM131	0.349472	0.713656	0.126	0.091	1
HNRNPH1	0.350073	0.484666	0.252	0.212	1
LIFR	0.350279	-0.328925	0.098	0.136	1
MECP2	0.350709	0.403211	0.147	0.106	1
RTN1	0.351159	0.251172	0.206	0.152	1
MKLN1	0.352357	-0.549304	0.273	0.318	1
ILK	0.354194	0.507673	0.112	0.076	1
THY1	0.355585	-0.345857	0.073	0.106	1
SELENOM	0.356819	-0.31453	0.098	0.136	1
ANK3	0.359245	-0.63072	0.101	0.136	1
EEA1	0.36007	-0.537261	0.073	0.106	1
BST2	0.360299	0.361739	0.287	0.258	1
DCTN1	0.36078	0.474928	0.112	0.076	1
SNRPN	0.361082	0.356587	0.133	0.091	1
FGD6	0.361573	-0.317573	0.073	0.106	1
ABL1	0.361812	-0.274594	0.122	0.167	1
TMEM258	0.362059	0.67405	0.14	0.106	1
ZMYM4	0.363256	-0.408842	0.126	0.167	1
SERPINH1	0.364609	0.294871	0.143	0.106	1
CELF1	0.366862	-0.38745	0.126	0.167	1
VWA1	0.367442	-0.256216	0.098	0.136	1
CTSZ	0.368051	-0.26961	0.07	0.106	1
IFNGR1	0.369278	-0.372436	0.126	0.167	1
SH3GLB1	0.370492	0.503229	0.203	0.167	1
KMT2C	0.370994	-0.271697	0.259	0.318	1
NIN	0.371542	-0.572206	0.077	0.106	1
IQGAP1	0.372746	0.428345	0.241	0.197	1
GIGYF2	0.37292	0.553619	0.14	0.106	1
ATP6V1A	0.374181	0.339089	0.112	0.076	1
NDUFA12	0.374865	0.577936	0.192	0.152	1
GPRC5B	0.375656	0.354015	0.129	0.091	1
ARPC1B	0.375915	0.379995	0.238	0.197	1
COX7A2	0.376176	0.292617	0.157	0.227	1
KLHL5	0.376508	0.327674	0.231	0.182	1
NCOR2	0.377816	0.333149	0.147	0.106	1
SYNE2	0.378442	0.294834	0.297	0.242	1
REV3L	0.37854	0.688145	0.185	0.152	1
FOXO1	0.378864	0.287524	0.168	0.121	1
RUNX1T1	0.380404	-0.749439	0.091	0.121	1
SYT1	0.380459	-0.255423	0.199	0.136	1
EVI5	0.380995	0.33634	0.112	0.076	1
ANKRD28	0.381378	0.466925	0.108	0.076	1
RTN3	0.38218	0.304238	0.164	0.121	1
PRKACB	0.384129	-0.330286	0.143	0.182	1
RPL37A	0.38508	-0.508257	0.51	0.53	1
CAPZA2	0.385222	0.530114	0.14	0.106	1
CAST	0.389807	0.45717	0.238	0.197	1
TENT2	0.391764	0.541503	0.122	0.091	1
SMURF2	0.394031	-0.441332	0.14	0.182	1
ZSWIM5	0.396835	0.510575	0.108	0.076	1
FOCAD	0.396835	0.507435	0.108	0.076	1
TM9SF3	0.39769	0.349735	0.192	0.152	1
PPP4R3B	0.398821	-0.282595	0.073	0.106	1
DYNLL2	0.399066	0.250506	0.112	0.076	1
YWHAH	0.399749	0.313972	0.248	0.197	1
NSD3	0.400107	-0.252233	0.182	0.227	1
RB1CC1	0.400291	-0.389516	0.115	0.152	1
TUBB6	0.401659	0.59925	0.105	0.076	1
CLIC1	0.40213	0.351266	0.192	0.152	1
VPS54	0.40284	0.73987	0.119	0.091	1
YWHAG	0.402854	0.406186	0.14	0.106	1
RAP1B	0.403244	0.300814	0.227	0.182	1
CAMK1D	0.405335	-0.408066	0.21	0.258	1
NAV1	0.40878	-0.343494	0.077	0.106	1
RPL35A	0.409775	0.427728	0.308	0.273	1
VGLL4	0.410872	0.437965	0.217	0.182	1
SLK	0.411891	0.508868	0.105	0.076	1
CDC27	0.412053	0.538668	0.122	0.091	1
HECTD4	0.412419	-0.320681	0.101	0.136	1
LINC00599	0.412495	-0.646843	0.108	0.136	1
SHISA5	0.413371	0.526243	0.136	0.106	1
TBL1XR1	0.41704	-0.279294	0.199	0.242	1
TCF4	0.421525	0.484266	0.472	0.47	1
UQCR11	0.421659	0.293812	0.234	0.212	1
EML4	0.42167	-0.285776	0.077	0.106	1
ELOB	0.422659	0.538798	0.22	0.197	1
OIP5-AS1	0.424212	0.335493	0.157	0.121	1
TCEAL9	0.425107	0.571191	0.119	0.091	1
CHD6	0.42705	-0.379118	0.105	0.136	1
AL117381.1	0.428204	-0.250938	0.077	0.106	1
CTNND2	0.431298	-0.63972	0.094	0.121	1
CDKN1A	0.431521	0.419156	0.14	0.106	1
SUN2	0.433694	-0.326283	0.129	0.167	1
MCC	0.434252	-0.31127	0.105	0.136	1
XIAP	0.434841	0.270038	0.108	0.076	1
MAP2	0.435153	-0.551124	0.136	0.167	1
SMAD7	0.43552	0.444837	0.14	0.106	1
UBL5	0.436132	0.682418	0.217	0.197	1
MT-ND1	0.436554	0.29439	0.311	0.273	1
APBB2	0.436692	0.378922	0.262	0.212	1
MYCBP2	0.438679	0.252847	0.238	0.197	1
PRDX1	0.438794	0.443816	0.269	0.242	1
ELOVL5	0.439778	-0.461487	0.077	0.106	1
RPS16	0.440502	-0.368287	0.287	0.333	1
SNX3	0.440561	0.273851	0.22	0.182	1
RPL36	0.441004	0.39201	0.455	0.455	1
SUSD6	0.44212	-0.262825	0.14	0.182	1
CRYAB	0.444452	-0.38584	0.105	0.136	1
YY1	0.446839	0.46166	0.136	0.106	1
CDC42	0.447961	0.533578	0.21	0.182	1
MYO10	0.448331	0.324554	0.21	0.167	1
ARHGAP31	0.449651	0.320125	0.157	0.121	1
RAF1	0.45237	0.640635	0.101	0.076	1
IL32	0.45246	0.565519	0.119	0.091	1
HNRNPUL1	0.453223	-0.259127	0.077	0.106	1
SRGN	0.45343	0.359455	0.318	0.288	1
TGFB1	0.454336	0.404811	0.105	0.076	1
PGK1	0.455392	0.285125	0.203	0.167	1
ACSL3	0.456713	0.326573	0.15	0.121	1
UBE2V1	0.456713	0.555263	0.15	0.121	1
PRDX2	0.457064	0.541873	0.178	0.152	1
VAMP5	0.457112	0.423768	0.175	0.136	1
EIF5B	0.460759	0.540448	0.196	0.167	1
BZW1	0.460943	0.5973	0.147	0.121	1
DPYD	0.461953	-0.281059	0.206	0.242	1
ACBD6	0.462167	0.269483	0.105	0.076	1
TMTC2	0.462688	0.332667	0.157	0.121	1
RPS6KC1	0.462692	-0.35032	0.122	0.152	1
RASA2	0.463437	0.289355	0.136	0.106	1
CHSY1	0.469402	-0.306634	0.206	0.242	1
RGS6	0.469507	-0.572916	0.08	0.106	1
MZT2B	0.470593	0.337795	0.108	0.152	1
FHIT	0.471308	-0.312715	0.175	0.212	1
LYST	0.471766	-0.31799	0.136	0.167	1
FBXW11	0.471766	0.525162	0.147	0.121	1
SERBP1	0.472227	0.651427	0.161	0.136	1
TBC1D15	0.472918	-0.30216	0.08	0.106	1
TSPAN5	0.473609	0.367868	0.168	0.136	1
MRPL51	0.474594	0.31205	0.073	0.106	1
MGAT5	0.475675	0.46573	0.241	0.212	1
RABGAP1	0.476451	0.333791	0.105	0.076	1
TMSB4X	0.47819	-0.522897	0.633	0.621	1
ZIC1	0.479782	-0.436807	0.08	0.106	1
IFITM1	0.485192	0.346823	0.171	0.136	1
CBX3	0.485413	0.572363	0.161	0.136	1
RPS3	0.485447	-0.319973	0.301	0.333	1
DNM3	0.485549	-0.289125	0.175	0.212	1
NECTIN2	0.486125	0.354759	0.101	0.076	1
NUMB	0.488074	-0.468248	0.15	0.182	1
FGF14	0.491921	-0.315933	0.08	0.106	1
CLASP1	0.492423	-0.250624	0.196	0.242	1
CEP350	0.493416	-0.3257	0.094	0.121	1
TUT4	0.494109	0.301941	0.185	0.152	1
ABCC4	0.495295	-0.263923	0.108	0.136	1
CPSF6	0.49542	-0.349934	0.08	0.106	1
CDC42BPB	0.495733	-0.266019	0.122	0.152	1
SEMA6A	0.497608	0.341859	0.119	0.091	1
PDIA3	0.499074	0.680566	0.126	0.106	1
IGF1R	0.499252	0.253096	0.395	0.348	1
ATP2A2	0.500129	-0.445959	0.136	0.167	1
RPL6	0.500912	0.276467	0.402	0.364	1
CACNA2D1	0.502457	-0.325204	0.08	0.106	1
WARS	0.503079	0.388056	0.133	0.106	1
NEK7	0.50433	0.598178	0.157	0.136	1
GABARAPL2	0.50506	0.395315	0.147	0.121	1
CDK6	0.505995	-0.386167	0.08	0.106	1
SLC23A2	0.505995	-0.335391	0.08	0.106	1
ADAM10	0.507127	-0.374726	0.178	0.212	1
NUMA1	0.507803	-0.479177	0.098	0.121	1
ENY2	0.507885	0.250473	0.087	0.121	1
ZNF532	0.507937	-0.521681	0.084	0.106	1
SMAD9	0.511046	0.443476	0.101	0.076	1
ACTN1	0.513055	0.26439	0.21	0.182	1
USP54	0.513492	-0.40836	0.203	0.152	1
SRSF4	0.514107	0.46714	0.175	0.152	1
PAPOLA	0.515795	0.280607	0.182	0.152	1
FAR1	0.516014	-0.431693	0.098	0.121	1
NSRP1	0.516896	0.362774	0.164	0.136	1
ARID2	0.517941	0.257927	0.133	0.106	1
PCBP1-AS1	0.518492	-0.352346	0.084	0.106	1
ARNT2	0.518519	-0.325923	0.112	0.136	1
NCOA7	0.518616	0.322329	0.168	0.136	1
GDI1	0.518748	0.650159	0.126	0.106	1
GSK3B	0.51986	0.26194	0.196	0.167	1
MTPN	0.520011	0.574582	0.143	0.121	1
CLK1	0.520863	-0.316775	0.112	0.136	1
MARCKS	0.522654	-0.309822	0.126	0.152	1
ATP6V1G1	0.523369	0.346946	0.161	0.136	1
RERE	0.525879	-0.279124	0.308	0.348	1
PPP2R5C	0.526202	-0.35158	0.168	0.197	1
DCP2	0.527488	0.290499	0.077	0.106	1
GNAI2	0.528067	0.467958	0.252	0.227	1
HSPD1	0.530933	0.658639	0.154	0.136	1
MTMR3	0.530944	0.526243	0.112	0.091	1
RPS5	0.531544	0.500704	0.269	0.258	1
RBM8A	0.533448	0.516506	0.157	0.136	1
DEK	0.533765	0.645173	0.154	0.136	1
ENAH	0.534317	-0.280761	0.098	0.121	1
LAPTM4A	0.534384	0.48124	0.129	0.106	1
DHRS7	0.536725	0.391997	0.077	0.106	1
GRN	0.537462	0.476784	0.129	0.106	1
NDUFB7	0.538582	0.372977	0.077	0.106	1
CTNNA3	0.539935	-0.260878	0.084	0.106	1
CAMKMT	0.541496	0.37717	0.161	0.136	1
ANXA2	0.542903	0.365501	0.161	0.136	1
RPS6KA3	0.544409	0.261899	0.15	0.121	1
EIF4G3	0.545363	-0.35219	0.304	0.318	1
CYB5R3	0.548199	0.318817	0.196	0.167	1
ZNF652	0.551236	-0.336272	0.098	0.121	1
PSMA6	0.55189	0.507742	0.157	0.136	1
ACSL4	0.556112	0.357152	0.129	0.106	1
CDC42BPA	0.556608	0.34462	0.238	0.212	1
SETD3	0.558626	-0.544001	0.101	0.121	1
RIC1	0.559974	-0.401206	0.084	0.106	1
MT-ND3	0.560566	0.276353	0.36	0.333	1
ARHGDIA	0.561227	0.434504	0.157	0.136	1
CTBP1	0.561814	-0.458649	0.084	0.106	1
LHFPL2	0.562333	-0.266899	0.112	0.136	1
CFH	0.562393	-0.420577	0.133	0.152	1
RAB21	0.562433	0.453364	0.112	0.091	1
PET100	0.562672	0.319284	0.178	0.152	1
LPAR6	0.564975	-0.41466	0.14	0.167	1
GNG5	0.566695	0.558966	0.21	0.197	1
PPP4R2	0.567927	0.360877	0.129	0.106	1
RSRC2	0.568336	0.631772	0.154	0.136	1
RLF	0.568336	-0.417829	0.087	0.106	1
LAMTOR5	0.568828	0.359547	0.126	0.106	1
ZBTB46	0.570163	-0.552991	0.087	0.106	1
HIPK3	0.572102	0.256603	0.224	0.197	1
ZFAND6	0.572561	0.358187	0.112	0.091	1
DNM1	0.572822	-0.47736	0.15	0.167	1
NDUFA4	0.573919	0.283507	0.217	0.273	1
RFX3	0.576644	-0.304152	0.245	0.258	1
TASOR	0.581737	-0.496486	0.101	0.121	1
ASTN2	0.584871	-0.463885	0.087	0.106	1
NDUFA1	0.585289	0.686315	0.203	0.197	1
PDE5A	0.586199	0.283279	0.112	0.091	1
HSD17B4	0.586199	0.346067	0.112	0.091	1
MYOF	0.586655	-0.344604	0.129	0.152	1
SF3B1	0.586933	0.519848	0.108	0.091	1
ADAR	0.587499	0.492329	0.154	0.136	1
UACA	0.588986	-0.296346	0.147	0.167	1
SBF2	0.589445	0.310778	0.234	0.212	1
TPT1	0.589717	0.257	0.448	0.424	1
ITSN2	0.590474	0.546983	0.154	0.136	1
MAP3K3	0.591442	0.33636	0.126	0.106	1
CCT3	0.595023	0.519806	0.122	0.106	1
SAMHD1	0.596599	0.269359	0.08	0.106	1
SHC2	0.59709	-0.36212	0.15	0.167	1
SFPQ	0.598576	-0.352812	0.15	0.167	1
KRTCAP2	0.600882	0.343608	0.182	0.167	1
SRPK1	0.60431	0.253721	0.08	0.106	1
SNHG9	0.612914	-0.371566	0.087	0.106	1
ENO2	0.61446	-0.396606	0.119	0.136	1
MACF1	0.615245	-0.368218	0.427	0.47	1
PTP4A2	0.615667	-0.346798	0.105	0.121	1
HLA-DRB1	0.616687	0.366083	0.14	0.121	1
PPIB	0.617479	0.446666	0.129	0.167	1
ESRRA	0.619628	0.525844	0.105	0.091	1
TRA2A	0.620055	-0.447942	0.105	0.121	1
GPX4	0.623148	-0.428632	0.143	0.167	1
DENND1A	0.623608	0.274963	0.224	0.197	1
COPB1	0.625039	0.486093	0.105	0.091	1
AURKAIP1	0.625741	0.413088	0.08	0.106	1
UMAD1	0.626201	-0.803673	0.087	0.106	1
UPF3A	0.626201	-0.510414	0.087	0.106	1
PABPC4	0.630601	0.346142	0.175	0.227	1
DYM	0.633402	0.330404	0.182	0.167	1
MLEC	0.634573	0.51167	0.161	0.152	1
SPATA13	0.63559	0.376169	0.08	0.106	1
EBF1	0.638878	0.271539	0.171	0.152	1
TRAPPC5	0.638954	0.484307	0.105	0.136	1
SEC62	0.639703	0.505786	0.245	0.242	1
S100A11	0.642306	-0.346833	0.266	0.303	1
MIER1	0.642478	-0.321854	0.115	0.091	1
LONP2	0.642739	0.254451	0.108	0.091	1
GSN	0.644905	0.505352	0.178	0.167	1
NDUFV2	0.647057	0.255326	0.108	0.136	1
USP12	0.650554	0.459946	0.105	0.091	1
CLTC	0.655612	0.298286	0.175	0.212	1
BASP1	0.658218	-0.420096	0.119	0.136	1
B2M	0.658389	-0.446136	0.745	0.636	1
RNF220	0.660873	-0.487302	0.15	0.167	1
ITCH	0.662666	0.313328	0.168	0.152	1
YWHAB	0.66314	0.421974	0.203	0.197	1
CNTNAP2	0.66342	-0.65496	0.164	0.167	1
LEPR	0.665242	0.367758	0.15	0.136	1
STRN	0.665323	0.345868	0.105	0.091	1
TOMM7	0.667183	0.668442	0.182	0.182	1
ZDHHC21	0.667736	-0.408265	0.136	0.152	1
APOD	0.67021	-0.273047	0.119	0.136	1
STX12	0.672022	0.391755	0.136	0.121	1
SMCHD1	0.67431	-0.306027	0.217	0.227	1
VAMP2	0.676337	0.385406	0.15	0.136	1
ATF7IP2	0.677902	-0.533918	0.091	0.106	1
TMEM87B	0.680537	-0.265002	0.087	0.106	1
TIAM2	0.680863	-0.270983	0.108	0.121	1
DNAJC15	0.684539	0.361206	0.178	0.167	1
SERPINB1	0.687175	0.295756	0.084	0.106	1
PIK3CA	0.68772	0.344246	0.105	0.091	1
UBXN4	0.693293	0.331542	0.122	0.152	1
SAMD12	0.694182	0.379949	0.227	0.212	1
YWHAZ	0.694212	0.564871	0.227	0.227	1
SLC7A11	0.696276	-0.427378	0.108	0.121	1
PSMD8	0.696364	0.449861	0.133	0.167	1
ROCK1	0.698717	0.264844	0.136	0.121	1
VCP	0.700914	0.295578	0.105	0.091	1
CALCOCO2	0.703047	0.425723	0.101	0.091	1
PTN	0.705031	0.326239	0.154	0.136	1
LSAMP	0.706742	-0.532679	0.157	0.167	1
SWAP70	0.714571	0.619123	0.112	0.106	1
KALRN	0.717754	-0.336062	0.14	0.152	1
RPL38	0.717932	0.298723	0.371	0.379	1
TRAM1	0.718398	0.260365	0.087	0.106	1
FEZ2	0.7195	0.304607	0.175	0.167	1
RANBP2	0.722556	-0.315985	0.122	0.136	1
LARGE1	0.726059	-0.35071	0.129	0.106	1
GSTP1	0.726771	0.296968	0.203	0.197	1
RPS2	0.728892	-0.409843	0.364	0.348	1
RNGTT	0.731092	-0.286373	0.091	0.106	1
CAMSAP2	0.733668	0.317709	0.133	0.121	1
COX6A1	0.733881	0.285245	0.21	0.197	1
HSPE1	0.734818	0.422131	0.157	0.152	1
ATP5MG	0.736902	0.381164	0.171	0.167	1
GNB4	0.745672	0.34254	0.101	0.091	1
IDS	0.746496	0.257689	0.164	0.152	1
DAD1	0.746751	0.27952	0.087	0.106	1
FBXO11	0.747882	0.304546	0.161	0.152	1
DDX6	0.747912	0.555036	0.112	0.106	1
SLCO3A1	0.748542	0.438386	0.143	0.136	1
EXOC2	0.748775	0.356107	0.115	0.106	1
ABI2	0.75141	0.27647	0.147	0.136	1
SOS2	0.753511	0.272607	0.101	0.091	1
FLOT1	0.753574	0.374969	0.143	0.136	1
SOD2	0.761495	-0.360748	0.157	0.167	1
COMMD6	0.76228	0.450833	0.126	0.121	1
PDLIM5	0.765144	-0.67799	0.154	0.136	1
PRKN	0.765808	-0.358598	0.129	0.136	1
CDC42SE2	0.766376	0.377447	0.115	0.106	1
DDX21	0.773358	0.278233	0.129	0.121	1
SELENOH	0.773473	0.510238	0.154	0.152	1
TRAPPC9	0.774177	-0.318586	0.108	0.121	1
GPHN	0.774376	0.26973	0.231	0.227	1
EIF4H	0.774462	0.357127	0.14	0.136	1
ROBO2	0.774756	-0.355501	0.112	0.121	1
NDUFC1	0.775118	0.451298	0.168	0.167	1
SOD1	0.77828	0.423178	0.168	0.167	1
ANAPC16	0.77984	0.384022	0.112	0.106	1
RAD51B	0.780044	0.373888	0.157	0.152	1
RPL36AL	0.784888	0.333929	0.154	0.182	1
ARPC3	0.785372	0.350877	0.234	0.242	1
ARFGEF2	0.790451	-0.376076	0.161	0.167	1
RHOB	0.790921	0.398456	0.126	0.121	1
AFF3	0.79158	-0.259127	0.168	0.182	1
TGFBR3	0.794411	0.255449	0.115	0.106	1
GPBP1	0.795897	0.292135	0.143	0.136	1
CACNA1C	0.798424	-0.986901	0.133	0.136	1
MGAT4A	0.798864	0.320641	0.185	0.182	1
GMDS	0.800805	-0.256465	0.171	0.182	1
RBMX	0.802579	-0.25471	0.231	0.242	1
SLCO2B1	0.803463	-0.267505	0.276	0.273	1
SRGAP2C	0.804513	0.375135	0.112	0.106	1
HNRNPM	0.805786	0.613635	0.189	0.197	1
NFE2L2	0.806031	0.37916	0.22	0.227	1
NDUFB4	0.807095	0.393492	0.14	0.136	1
RBM39	0.807661	0.32052	0.217	0.258	1
URI1	0.817143	0.444913	0.115	0.136	1
ATRX	0.820945	-0.320015	0.206	0.212	1
THRAP3	0.821663	0.269474	0.126	0.121	1
AP001011.1	0.822563	0.369314	0.091	0.106	1
COPS9	0.825032	0.26787	0.143	0.136	1
CGGBP1	0.831302	0.295819	0.112	0.106	1
MAP3K2	0.834405	0.363994	0.126	0.121	1
EGLN1	0.836446	0.306434	0.122	0.121	1
PSMD1	0.838325	0.268089	0.14	0.136	1
HIPK1	0.839102	0.266766	0.105	0.121	1
TRIR	0.842998	0.313141	0.105	0.121	1
MXI1	0.843556	-0.289884	0.143	0.121	1
PLD3	0.84885	0.33604	0.105	0.121	1
H2AFV	0.849826	0.426215	0.108	0.106	1
HIF1A	0.850584	0.28063	0.231	0.227	1
RREB1	0.851779	0.341124	0.108	0.106	1
PINK1	0.852682	0.343156	0.126	0.121	1
CTSD	0.860166	0.267896	0.14	0.136	1
KIFAP3	0.861557	0.405352	0.108	0.106	1
RALGAPA2	0.863687	0.316054	0.126	0.121	1
ARL6IP1	0.864183	0.316283	0.122	0.121	1
ATF6	0.867434	0.27572	0.108	0.106	1
GLIS3	0.867895	0.381234	0.122	0.121	1
HSPA1A	0.868516	-0.282037	0.192	0.182	1
NARS	0.873468	0.405456	0.122	0.121	1
ZCCHC7	0.874037	0.36478	0.15	0.152	1
LAMP1	0.876425	-0.299698	0.133	0.136	1
ARL8B	0.879047	0.344382	0.122	0.121	1
PCBP1	0.886697	0.306232	0.122	0.136	1
LAMA4	0.89207	-0.664388	0.101	0.091	1
RAB7A	0.895056	0.326203	0.161	0.182	1
C6orf62	0.896698	0.338487	0.105	0.106	1
SMG1	0.908572	-0.41466	0.14	0.136	1
HNRNPK	0.9124	0.356732	0.276	0.303	1
SELENOT	0.912675	0.347498	0.105	0.106	1
NAP1L1	0.914787	0.280197	0.15	0.167	1
DLGAP1	0.918256	-0.516039	0.122	0.121	1
HNRNPU	0.919749	0.303571	0.161	0.182	1
NDUFA11	0.920257	0.481472	0.133	0.152	1
KANK1	0.920677	-0.303931	0.105	0.106	1
DDX46	0.922678	0.387138	0.105	0.106	1
SAP18	0.92477	0.458027	0.101	0.106	1
PFDN5	0.929323	0.387005	0.164	0.182	1
TMBIM4	0.92975	0.26799	0.189	0.197	1
NSUN6	0.934976	0.312351	0.112	0.121	1
NDUFS1	0.940145	0.291283	0.119	0.121	1
ZC3HAV1	0.941427	0.538837	0.115	0.121	1
TBC1D1	0.948359	0.291096	0.126	0.136	1
CLEC2B	0.948414	0.283472	0.133	0.136	1
OSBPL8	0.95232	0.28471	0.147	0.152	1
FNIP1	0.953848	-0.287821	0.112	0.106	1
MYL12A	0.954928	0.322639	0.206	0.227	1
NDRG2	0.959447	-0.531124	0.143	0.136	1
NDUFS5	0.95963	0.603621	0.133	0.152	1
TOMM20	0.960612	0.461379	0.115	0.121	1
ATAD2B	0.96336	0.353467	0.101	0.106	1
ST6GAL1	0.96733	-0.261298	0.311	0.303	1
DYNLRB1	0.969555	0.402025	0.126	0.136	1
SOCS3	0.972134	0.366789	0.115	0.121	1
LDHA	0.974392	0.341169	0.15	0.167	1
CCDC88A	0.977604	0.316561	0.101	0.106	1
ATP11B	0.977604	0.36767	0.101	0.106	1
NDUFA13	0.979667	0.356665	0.248	0.273	1
ZRANB2	0.981675	0.319532	0.101	0.106	1
[truncated: 8 more rows]

## Sheet: Oli_AD_logNorm_diffEx
gene	p_val	avg_log2FC	pct.1	pct.2	p_val_adj
MALAT1	0	-0.871598	1	1	0
NRXN3	0	-0.894625	0.637	0.818	0
ANLN	0	0.743228	0.678	0.439	0
ERBIN	0	0.841263	0.885	0.71	0
GPM6B	0	0.491287	0.9	0.798	0
HSPA1A	0	1.00993	0.39	0.192	0
LAMP2	0	0.659714	0.798	0.595	0
MID1IP1	0	1.05366	0.374	0.131	0
NDRG1	0	0.644265	0.688	0.461	0
NEAT1	0	0.889297	0.862	0.716	0
QDPR	0	0.678725	0.829	0.633	0
SLC38A2	0	1.30153	0.565	0.231	0
SUN2	0	0.809309	0.74	0.474	0
PPP2R2B	1.96224e-304	-0.537979	0.808	0.879	6.0686e-300
FKBP5	1.88882e-290	0.78688	0.421	0.226	5.84156e-286
GPRC5B	2.59071e-281	0.509463	0.791	0.615	8.01228e-277
PDE1A	2.61187e-268	-1.01875	0.283	0.446	8.07773e-264
EDIL3	1.79413e-265	0.429831	0.91	0.827	5.5487e-261
MEG3	1.22474e-250	-1.13937	0.097	0.244	3.78776e-246
RBFOX1	6.08444e-248	-1.08163	0.142	0.299	1.88173e-243
MAN2A1	3.71219e-246	0.459994	0.858	0.726	1.14807e-241
CLDND1	2.66642e-239	0.456358	0.805	0.647	8.24645e-235
CCP110	2.93632e-225	0.580272	0.445	0.261	9.08114e-221
TUBB4A	3.54137e-224	0.61886	0.587	0.42	1.09524e-219
NDRG2	1.21247e-219	0.514297	0.52	0.323	3.7498e-215
DHCR24	1.47258e-219	0.712299	0.314	0.158	4.55426e-215
MT-ND3	2.06053e-216	0.618562	0.495	0.314	6.37259e-212
SORT1	4.92819e-215	0.434455	0.787	0.63	1.52414e-210
SPP1	8.06386e-203	0.488855	0.759	0.599	2.49391e-198
PLP1	5.04821e-201	0.368729	0.959	0.943	1.56126e-196
EFHD1	1.58648e-200	0.524439	0.55	0.364	4.9065e-196
SELENOP	2.44573e-199	0.512697	0.721	0.551	7.5639e-195
CA2	5.27285e-198	0.61786	0.376	0.215	1.63073e-193
CPQ	2.97853e-197	0.537798	0.428	0.255	9.2117e-193
AMER2	1.6468e-194	0.471531	0.671	0.5	5.09307e-190
SLC44A1	6.55136e-192	0.335385	0.934	0.882	2.02614e-187
HTRA1	9.62127e-188	0.490504	0.536	0.362	2.97557e-183
S100A6	4.01774e-187	0.780735	0.132	0.038	1.24257e-182
ADIPOR2	1.36347e-182	0.444331	0.61	0.427	4.21679e-178
ELMO1	2.09044e-182	0.397899	0.862	0.751	6.46511e-178
LIFR	3.8075e-182	0.506649	0.482	0.312	1.17755e-177
LRP4	5.92214e-182	0.61033	0.254	0.122	1.83154e-177
CSRP1	1.05465e-176	0.452954	0.523	0.347	3.26173e-172
PAQR8	2.44186e-171	0.515412	0.346	0.198	7.55193e-167
RALGDS	6.77265e-168	0.495965	0.384	0.229	2.09458e-163
CERCAM	1.95391e-166	-0.560551	0.556	0.648	6.04284e-162
SGK1	2.57973e-166	0.381479	0.763	0.586	7.97833e-162
BOK	2.11764e-165	0.504593	0.348	0.2	6.54922e-161
NKX6-2	3.26452e-165	0.424548	0.582	0.404	1.00962e-160
KCNIP4	2.69194e-164	-0.933014	0.167	0.292	8.32536e-160
MT-ND2	3.20836e-163	0.457047	0.439	0.279	9.9225e-159
IGF1R	9.98272e-162	0.603043	0.388	0.24	3.08736e-157
GPR37	3.84584e-160	0.424325	0.576	0.41	1.1894e-155
PDK4	5.12155e-158	0.508672	0.247	0.125	1.58394e-153
ZNF652	3.69835e-157	0.508435	0.458	0.305	1.14379e-152
CTSD	2.14821e-156	0.513397	0.352	0.208	6.64378e-152
NCAM1	3.13852e-156	0.321553	0.853	0.732	9.70649e-152
ATP1B1	5.18654e-155	0.432407	0.684	0.527	1.60404e-150
USP31	8.31854e-155	0.561438	0.281	0.154	2.57267e-150
AC009063.2	1.93662e-151	0.526722	0.33	0.194	5.9894e-147
DDR1	2.77598e-150	0.507206	0.343	0.204	8.58529e-146
PEX5L	3.55833e-148	0.425918	0.796	0.685	1.10049e-143
SEPTIN8	6.82645e-145	0.442272	0.389	0.245	2.11122e-140
AL359091.1	3.98167e-143	-0.644705	0.437	0.541	1.23141e-138
PTP4A2	2.78301e-141	0.410114	0.413	0.264	8.607e-137
ITPKB	4.98579e-140	0.550854	0.294	0.168	1.54196e-135
FRYL	1.1043e-139	0.343972	0.822	0.714	3.41528e-135
DIP2C	1.31955e-138	0.366706	0.721	0.57	4.08098e-134
PIM3	3.07216e-138	0.513534	0.134	0.05	9.50126e-134
PSAP	5.9809e-137	0.396643	0.613	0.455	1.84971e-132
MOBP	1.2102e-136	-0.44644	0.642	0.712	3.74278e-132
NCAM2	2.17686e-136	0.295141	0.894	0.808	6.73238e-132
ITGB8	2.18837e-136	0.427773	0.392	0.251	6.76798e-132
WDFY3	3.25905e-136	0.421667	0.532	0.381	1.00793e-131
RHOBTB1	9.09829e-135	0.471399	0.217	0.109	2.81383e-130
HSP90AA1	4.21717e-134	0.408643	0.734	0.595	1.30425e-129
COPA	1.11554e-133	0.469494	0.379	0.243	3.45002e-129
ZBTB16	1.18119e-133	0.425395	0.442	0.295	3.65308e-129
LRRC1	3.08196e-132	0.442948	0.363	0.228	9.53159e-128
METTL7A	9.05697e-132	0.441703	0.182	0.084	2.80105e-127
MYRF	3.90075e-131	0.353475	0.64	0.479	1.20639e-126
PRNP	1.83237e-130	0.415738	0.441	0.296	5.66698e-126
PDE1C	2.41798e-130	0.395263	0.776	0.655	7.47808e-126
LSS	2.31856e-129	0.430548	0.356	0.222	7.17061e-125
NPTX2	1.5412e-127	0.544458	0.121	0.045	4.76647e-123
PHGDH	4.39531e-127	0.414274	0.198	0.096	1.35934e-122
LAMP1	3.52079e-124	0.353657	0.439	0.292	1.08887e-119
PPA1	8.9922e-124	0.509822	0.309	0.188	2.78102e-119
NFKBIA	1.32008e-123	0.448523	0.14	0.058	4.0826e-119
OPCML	3.61728e-123	-0.800538	0.063	0.146	1.11871e-118
SPOCK3	1.26201e-122	0.322582	0.831	0.732	3.90302e-118
RTN4	2.48617e-121	0.30132	0.794	0.68	7.68899e-117
KIRREL3	1.63561e-120	0.368965	0.547	0.396	5.05844e-116
ROBO2	5.472e-119	-0.811667	0.056	0.134	1.69232e-114
UGT8	1.24679e-118	0.326881	0.673	0.534	3.85595e-114
PREX1	2.69669e-118	0.343141	0.585	0.436	8.34005e-114
SLC6A8	5.51151e-118	0.372646	0.282	0.165	1.70454e-113
ARRDC2	1.51144e-116	0.417632	0.173	0.083	4.67442e-112
ARHGAP21	8.58768e-116	0.322136	0.761	0.633	2.65591e-111
GLUL	1.46307e-115	0.381345	0.551	0.408	4.52483e-111
CADM2	4.54784e-115	0.320947	0.921	0.851	1.40651e-110
TMTC2	6.29302e-115	0.292803	0.872	0.777	1.94624e-110
TMBIM6	1.35095e-114	0.368342	0.454	0.314	4.17807e-110
NFKBIZ	2.43186e-114	0.377142	0.167	0.078	7.521e-110
SH3RF1	5.36745e-114	0.431621	0.258	0.149	1.65999e-109
PICALM	2.06313e-113	0.318962	0.71	0.573	6.38064e-109
CLCN4	8.36069e-113	0.410943	0.223	0.122	2.58571e-108
CDKN1C	1.50076e-112	0.421778	0.32	0.201	4.64139e-108
KCNJ10	1.62104e-112	0.366358	0.291	0.174	5.01338e-108
LRP2	2.63946e-112	0.407874	0.472	0.34	8.16305e-108
SIRT2	8.54057e-112	0.351014	0.447	0.307	2.64134e-107
BCL6	1.54658e-110	0.482224	0.168	0.082	4.7831e-106
CPEB2	3.69412e-110	0.366027	0.464	0.328	1.14248e-105
TLE4	3.02618e-109	0.367208	0.526	0.386	9.35906e-105
HP1BP3	8.62052e-109	0.349103	0.475	0.337	2.66607e-104
APLP1	3.33292e-108	0.297937	0.734	0.615	1.03077e-103
NRXN1	1.16838e-107	-0.741302	0.105	0.192	3.61344e-103
CREBRF	2.38175e-107	0.384574	0.244	0.139	7.36604e-103
ZSWIM6	1.4853e-106	0.354517	0.672	0.543	4.59358e-102
DLGAP1	2.22541e-106	-0.749107	0.081	0.163	6.88251e-102
HSPA1B	3.97441e-106	0.492395	0.153	0.071	1.22917e-101
ZCCHC24	4.10982e-105	0.360019	0.391	0.262	1.27104e-100
SOX10	1.0531e-102	0.349273	0.301	0.187	3.25693e-98
NAALADL2	1.59045e-102	-0.5781	0.254	0.355	4.91879e-98
NORAD	3.41181e-102	0.365296	0.246	0.143	1.05517e-97
ITPK1	4.53718e-102	0.362109	0.276	0.167	1.40321e-97
IRF2BP2	7.4537e-102	0.377149	0.277	0.169	2.30521e-97
DOCK1	1.24233e-100	0.370341	0.568	0.431	3.84216e-96
MT-CYB	2.11555e-100	0.363514	0.38	0.257	6.54277e-96
MBP	2.5195e-100	-0.256346	0.928	0.929	7.79205e-96
DHCR7	3.25989e-100	0.329277	0.164	0.081	1.00818e-95
CNDP1	1.59382e-99	0.364794	0.573	0.437	4.92921e-95
PHYHIPL	1.59677e-99	0.394305	0.465	0.336	4.93833e-95
SPOCK1	5.45603e-99	0.268505	0.833	0.72	1.68739e-94
GNAO1	8.53028e-99	0.298319	0.625	0.48	2.63816e-94
PLPP2	1.03929e-98	0.348235	0.249	0.147	3.21423e-94
AC004797.1	1.33851e-98	0.415236	0.248	0.148	4.13962e-94
PRRG1	1.37899e-98	0.334581	0.394	0.27	4.26481e-94
MAP4K5	2.26443e-98	0.31348	0.643	0.513	7.00321e-94
NRG3	5.72854e-98	-0.766462	0.079	0.155	1.77167e-93
BBS9	1.13816e-97	0.352403	0.404	0.28	3.51999e-93
OPALIN	1.16096e-97	-0.650014	0.33	0.41	3.59049e-93
AZGP1	4.91148e-97	0.369224	0.114	0.047	1.51897e-92
CD55	9.51761e-97	0.34447	0.299	0.189	2.94351e-92
CNTN2	1.62935e-96	0.28496	0.695	0.564	5.03911e-92
ARAP2	1.99346e-96	0.280546	0.73	0.609	6.16519e-92
MT-CO2	4.48021e-96	0.305221	0.574	0.432	1.3856e-91
CTNNA3	4.63511e-96	-0.268317	0.896	0.917	1.4335e-91
IVNS1ABP	4.79555e-96	0.331961	0.201	0.111	1.48312e-91
ANKRD28	4.90157e-96	0.373585	0.465	0.337	1.51591e-91
PCBP2	8.23834e-96	0.309968	0.285	0.177	2.54787e-91
TNKS	2.02554e-95	0.366576	0.438	0.314	6.2644e-91
NACC2	4.60993e-95	0.387425	0.184	0.098	1.42571e-90
CLMN	6.42769e-95	0.306167	0.649	0.512	1.98789e-90
MARCH6	1.94855e-94	0.315578	0.38	0.259	6.02629e-90
FMNL2	2.06029e-94	0.266562	0.86	0.781	6.37186e-90
WAC	4.39749e-94	0.319444	0.358	0.24	1.36001e-89
NFASC	1.11624e-93	0.279271	0.671	0.532	3.45218e-89
PLEKHB1	1.96859e-93	0.292947	0.342	0.224	6.08825e-89
PIEZO2	5.19221e-93	0.404174	0.451	0.328	1.60579e-88
SLC6A15	1.52371e-92	0.381194	0.175	0.093	4.71238e-88
SYNGR2	1.3785e-91	0.327433	0.262	0.161	4.26328e-87
ARRB1	1.54434e-91	0.394052	0.189	0.104	4.77617e-87
MKLN1	2.5773e-91	0.320351	0.493	0.363	7.97082e-87
NFIB	1.14473e-90	0.358108	0.36	0.244	3.54031e-86
CLIP4	1.41308e-90	0.366042	0.4	0.283	4.37023e-86
SC5D	4.06742e-90	0.349129	0.154	0.078	1.25793e-85
CHORDC1	5.04433e-90	0.357311	0.201	0.114	1.56006e-85
PLD5	5.56451e-90	0.357444	0.272	0.168	1.72094e-85
CELSR2	8.75973e-90	0.317123	0.175	0.093	2.70912e-85
PDE4D	1.03782e-89	-0.611462	0.211	0.3	3.20968e-85
USP32	1.62002e-89	0.347279	0.418	0.298	5.01024e-85
ACTN4	1.69925e-89	0.334522	0.343	0.232	5.25527e-85
FNIP2	2.34361e-89	0.345868	0.303	0.197	7.24807e-85
SERINC3	1.00478e-88	0.320512	0.271	0.169	3.10749e-84
CSMD1	1.23845e-88	-0.756723	0.128	0.208	3.83015e-84
VWA1	4.13785e-88	0.29917	0.362	0.245	1.27971e-83
GRIN2A	4.99109e-88	-0.564048	0.096	0.174	1.54359e-83
ARPP19	7.24249e-88	0.343674	0.24	0.146	2.23988e-83
ARHGAP5	7.28518e-88	0.32707	0.347	0.234	2.25309e-83
TMEM189	7.80049e-88	0.334575	0.164	0.086	2.41246e-83
IKZF2	1.11134e-87	0.350902	0.264	0.166	3.43703e-83
CADM1	1.49295e-87	0.313412	0.607	0.479	4.61723e-83
JADE2	2.12032e-86	0.336139	0.138	0.067	6.55752e-82
FKBP4	3.07455e-86	0.359004	0.142	0.071	9.50866e-82
PCBP1	4.58969e-86	0.350687	0.221	0.132	1.41945e-81
MT-ND1	8.74805e-86	0.319785	0.354	0.242	2.70551e-81
NUTM2A-AS1	9.66702e-86	0.297368	0.442	0.32	2.98972e-81
NCOA7	9.9968e-86	0.305349	0.564	0.437	3.09171e-81
PI16	1.31887e-85	0.277308	0.103	0.043	4.07887e-81
JUND	1.68089e-85	0.280582	0.454	0.327	5.1985e-81
RASSF2	2.93609e-85	0.328866	0.301	0.197	9.08046e-81
GIT1	3.12863e-85	0.326247	0.168	0.09	9.67592e-81
MT3	7.12267e-85	0.300152	0.521	0.385	2.20283e-80
AHSA1	8.07373e-85	0.397143	0.156	0.082	2.49696e-80
STARD7	8.75154e-85	0.337706	0.202	0.116	2.70659e-80
RYBP	1.14625e-84	0.284486	0.532	0.404	3.54499e-80
PLCL1	2.18892e-84	0.288467	0.84	0.756	6.76967e-80
NPAS3	4.82103e-84	0.29014	0.811	0.713	1.491e-79
TMC6	7.35307e-84	0.327059	0.224	0.134	2.27408e-79
LSAMP	9.15865e-84	-0.43535	0.506	0.574	2.8325e-79
NUFIP2	9.49344e-84	0.305736	0.26	0.163	2.93604e-79
FAM155A	1.70265e-83	-0.608354	0.056	0.12	5.26578e-79
MAT2A	3.19733e-83	0.321388	0.332	0.224	9.88837e-79
SYT1	5.38948e-83	-0.747555	0.122	0.199	1.6668e-78
ZNF24	6.14425e-83	0.310813	0.198	0.114	1.90023e-78
PDS5B	1.19354e-82	0.330764	0.319	0.214	3.69127e-78
CDKN1B	1.26932e-82	0.327848	0.158	0.084	3.92562e-78
MEGF10	1.98886e-82	0.284753	0.457	0.333	6.15094e-78
FAM13B	2.97885e-82	0.357115	0.394	0.28	9.21269e-78
TPPP	3.80564e-82	0.266393	0.48	0.351	1.17697e-77
DNER	8.18436e-82	0.306639	0.438	0.319	2.53118e-77
MTMR10	1.28746e-81	0.307754	0.286	0.187	3.98173e-77
SARAF	1.33258e-81	0.291789	0.33	0.222	4.12128e-77
MAP7D1	1.98496e-81	0.28499	0.279	0.179	6.1389e-77
SILC1	3.35916e-81	0.299611	0.358	0.248	1.03889e-76
MBNL1	4.36826e-81	0.290636	0.509	0.383	1.35097e-76
PTPRM	8.86501e-81	0.555793	0.179	0.101	2.74168e-76
KLHL24	1.82803e-80	0.278034	0.361	0.249	5.65354e-76
SLC22A23	2.08269e-80	0.329882	0.409	0.292	6.44113e-76
LINC00513	3.13994e-80	0.415703	0.25	0.158	9.71088e-76
NEO1	6.65789e-80	0.27206	0.544	0.413	2.05909e-75
AMD1	1.99661e-79	0.273834	0.476	0.35	6.1749e-75
PAK2	2.91541e-79	0.298668	0.264	0.168	9.0165e-75
CDKL1	3.45888e-79	0.265816	0.21	0.122	1.06973e-74
MTMR2	4.50028e-79	0.31022	0.284	0.186	1.3918e-74
SLC39A11	7.10032e-79	0.352991	0.489	0.372	2.19592e-74
FGF14	7.49223e-79	-0.626925	0.052	0.112	2.31712e-74
XPO1	1.26362e-78	0.314655	0.338	0.233	3.908e-74
FSCN1	1.37164e-78	0.298391	0.296	0.196	4.24207e-74
VEZF1	1.91706e-78	0.288058	0.222	0.135	5.9289e-74
FANCC	3.37175e-78	0.33492	0.128	0.063	1.04278e-73
ZNF365	4.13149e-78	0.332485	0.264	0.17	1.27775e-73
NACAD	2.00166e-77	0.299669	0.186	0.107	6.19053e-73
EIF1	4.4082e-77	0.282087	0.505	0.376	1.36332e-72
GTF2I	1.24707e-76	0.265337	0.531	0.405	3.85682e-72
AC119674.1	1.27505e-76	0.284061	0.102	0.045	3.94334e-72
SFRP1	1.3173e-76	0.268888	0.159	0.086	4.07402e-72
SPATA13	2.15155e-76	0.299199	0.347	0.241	6.65411e-72
FXYD6	3.39303e-76	-0.548198	0.049	0.106	1.04936e-71
RTN3	3.80971e-76	0.271991	0.572	0.446	1.17823e-71
FAM53B	5.21166e-76	0.274662	0.331	0.225	1.61181e-71
PACS2	9.08083e-76	0.30984	0.349	0.245	2.80843e-71
CERS2	9.29183e-76	0.265008	0.216	0.131	2.87369e-71
UBALD2	1.09557e-75	0.306886	0.102	0.045	3.38825e-71
PPM1B	1.35973e-75	0.268495	0.478	0.358	4.20523e-71
NCSTN	1.65033e-75	0.296544	0.14	0.073	5.10398e-71
ADAM12	5.22941e-75	0.276705	0.143	0.075	1.6173e-70
MT-ND4	6.82879e-75	0.267958	0.456	0.338	2.11194e-70
TECR	8.08355e-75	0.259152	0.314	0.213	2.5e-70
CDH19	1.00272e-74	0.364914	0.393	0.284	3.10112e-70
STARD13	1.2201e-74	0.322738	0.364	0.258	3.7734e-70
TMEM151A	1.99611e-74	0.300346	0.305	0.206	6.17336e-70
TAFA5	2.72615e-74	0.286125	0.196	0.115	8.43116e-70
DNAJB1	3.91255e-74	0.35994	0.131	0.067	1.21003e-69
PTGES3	1.26113e-73	0.305162	0.309	0.211	3.90031e-69
HNRNPA2B1	1.35057e-73	0.25565	0.476	0.355	4.17691e-69
B3GAT1	3.76816e-73	0.251568	0.316	0.214	1.16538e-68
IRS2	3.77765e-73	0.281628	0.142	0.075	1.16831e-68
FGF1	5.96603e-73	0.29252	0.27	0.177	1.84512e-68
DDIT4	2.62744e-72	0.275215	0.1	0.045	8.12587e-68
TMED10	2.33636e-71	0.295649	0.343	0.242	7.22566e-67
TKT	9.54423e-71	0.311439	0.176	0.102	2.95175e-66
ELF2	1.11825e-70	0.294745	0.475	0.361	3.45841e-66
ATG4C	1.16827e-70	0.266182	0.516	0.397	3.61309e-66
SLC6A9	1.61152e-70	0.288548	0.114	0.055	4.98395e-66
ARL8A	2.10386e-70	0.255892	0.296	0.2	6.50661e-66
TMCC2	4.32962e-70	0.271053	0.217	0.134	1.33902e-65
RHOBTB3	7.31037e-70	0.316147	0.204	0.126	2.26088e-65
CLDN11	1.10573e-69	0.250343	0.707	0.576	3.4197e-65
TBL1XR1	1.92522e-69	0.272057	0.415	0.305	5.95412e-65
DENND11	2.68365e-69	0.285798	0.189	0.113	8.29972e-65
TPRN	8.97954e-69	0.272358	0.192	0.115	2.7771e-64
AC093865.1	1.17909e-68	0.303791	0.129	0.067	3.64658e-64
FOLH1	1.48853e-68	-0.463352	0.356	0.422	4.60357e-64
PSAT1	1.76721e-68	0.286112	0.224	0.141	5.46546e-64
TMEM30A	1.8882e-68	0.258236	0.241	0.156	5.83965e-64
RAB30	3.1022e-68	0.262025	0.236	0.151	9.59418e-64
JAKMIP3	1.08445e-67	0.324328	0.227	0.146	3.35389e-63
L3MBTL4	1.15184e-67	0.269841	0.369	0.264	3.5623e-63
UBL3	2.89529e-67	0.29012	0.325	0.228	8.95425e-63
LINC00882	5.03424e-67	-0.478062	0.328	0.4	1.55694e-62
IRAK2	5.43234e-67	0.332552	0.133	0.071	1.68006e-62
PPP1CB	5.94332e-67	0.272686	0.204	0.127	1.83809e-62
PAPOLA	2.90899e-66	0.270662	0.281	0.19	8.99664e-62
EEF2	3.89494e-66	0.265604	0.277	0.186	1.20459e-61
TMTC4	4.05506e-66	0.255124	0.387	0.28	1.25411e-61
YY1	5.1566e-66	0.256563	0.171	0.1	1.59478e-61
LGR4	7.68314e-66	0.285837	0.113	0.056	2.37617e-61
RABGEF1	2.79943e-65	-0.497753	0.332	0.398	8.65779e-61
RAD21	3.37012e-65	0.275191	0.225	0.146	1.04228e-60
CFTR	3.80707e-65	-0.652305	0.177	0.245	1.17741e-60
PPDPF	4.13185e-65	-0.588541	0.163	0.232	1.27786e-60
GRIK2	4.519e-65	-0.592217	0.054	0.107	1.39759e-60
ALDH3A2	5.80303e-65	0.326719	0.158	0.093	1.7947e-60
EEF1A1	1.11661e-64	0.250399	0.513	0.392	3.45333e-60
NEK7	1.6526e-64	0.250754	0.24	0.156	5.11098e-60
DAZAP2	2.4126e-64	0.267077	0.203	0.127	7.46146e-60
HDAC4	3.16991e-64	0.283151	0.304	0.212	9.80358e-60
CPM	9.51315e-64	0.252762	0.265	0.177	2.94213e-59
ST6GALNAC3	9.51732e-64	0.289068	0.429	0.324	2.94342e-59
IL6ST	1.4812e-63	0.281903	0.243	0.162	4.5809e-59
SEMA3C	2.20461e-63	0.302068	0.21	0.134	6.81819e-59
ADAMTSL3	3.22468e-63	0.27334	0.175	0.104	9.97296e-59
DPP10	1.12077e-62	-0.645701	0.112	0.177	3.46622e-58
LMCD1-AS1	1.33436e-62	-0.444484	0.268	0.345	4.12679e-58
FDFT1	2.63337e-62	0.282136	0.265	0.18	8.14422e-58
NLGN1	2.84781e-62	0.282374	0.695	0.597	8.80743e-58
MFAP3L	2.85842e-62	0.265994	0.222	0.144	8.84024e-58
ZFP36L2	6.78017e-62	0.257456	0.102	0.05	2.0969e-57
AC109927.1	2.11549e-61	0.263061	0.139	0.077	6.54256e-57
DNM1	3.65236e-61	-0.554554	0.069	0.124	1.12957e-56
G3BP1	1.41474e-60	0.25337	0.177	0.108	4.37536e-56
PLOD3	1.73508e-60	0.256282	0.168	0.1	5.36608e-56
CHD7	2.18692e-60	0.306586	0.316	0.226	6.76349e-56
TRIM8	3.15811e-60	0.258325	0.111	0.058	9.76709e-56
NFKB1	3.90482e-60	0.254655	0.177	0.108	1.20764e-55
HSP90AB1	4.27433e-60	0.279523	0.535	0.423	1.32192e-55
TMED5	5.61825e-60	0.271358	0.128	0.071	1.73756e-55
STIP1	2.13812e-59	0.287576	0.15	0.088	6.61257e-55
TNPO1	2.28886e-59	0.294818	0.218	0.143	7.07877e-55
DOHH	5.01658e-59	0.266699	0.151	0.089	1.55148e-54
PANTR1	1.59804e-58	0.26903	0.239	0.161	4.94225e-54
PDE8A	1.8905e-58	-0.343403	0.615	0.645	5.84674e-54
KLF9	2.15048e-58	0.299379	0.132	0.076	6.6508e-54
KNOP1	2.76731e-58	0.251686	0.299	0.21	8.55846e-54
SYT14	9.95905e-58	-0.419894	0.09	0.149	3.08004e-53
DNAJB6	1.0417e-57	0.29289	0.228	0.153	3.22165e-53
AC233296.1	1.59019e-57	-0.493669	0.098	0.158	4.91799e-53
CTNNA1	2.13374e-57	0.264334	0.399	0.299	6.59902e-53
NCKAP5	2.93013e-57	0.262788	0.723	0.632	9.06202e-53
FNBP1	4.22821e-57	-0.399564	0.498	0.534	1.30766e-52
TPT1	4.38296e-57	0.277868	0.287	0.203	1.35552e-52
BAHCC1	5.0441e-57	0.263253	0.105	0.054	1.55999e-52
AC009041.2	6.1406e-57	-0.491818	0.367	0.423	1.8991e-52
SPRED1	3.40199e-56	0.273815	0.207	0.135	1.05213e-51
PNRC1	5.45725e-56	0.250139	0.156	0.094	1.68776e-51
BCL2	6.0715e-56	0.307753	0.239	0.163	1.87773e-51
KCNMB4	9.25517e-56	0.258267	0.419	0.318	2.86234e-51
SQSTM1	1.65177e-54	0.261049	0.285	0.202	5.10843e-50
LINC01170	6.16222e-54	-0.465013	0.248	0.318	1.90579e-49
ATF4	6.37746e-54	0.258508	0.167	0.104	1.97236e-49
BMI1	8.562e-54	0.255384	0.143	0.085	2.64797e-49
TP53TG5	1.72246e-53	-0.481567	0.216	0.28	5.32705e-49
PCA3	1.74147e-53	0.270537	0.272	0.191	5.38586e-49
PLIN3	2.11991e-53	0.264974	0.155	0.095	6.55624e-49
CTDSP2	3.41818e-53	0.261834	0.138	0.081	1.05714e-48
LDLRAD4	5.62461e-53	-0.491711	0.222	0.285	1.73952e-48
UNC79	4.11432e-52	-0.511129	0.13	0.188	1.27244e-47
FRMD4A	4.55701e-52	-0.619284	0.139	0.198	1.40935e-47
STMN4	5.06209e-52	-0.451118	0.309	0.369	1.56555e-47
AC006148.1	5.10416e-52	0.304734	0.291	0.21	1.57856e-47
CXXC5	2.96199e-51	0.268534	0.23	0.158	9.16055e-47
LRRTM4	3.49058e-51	-0.521286	0.112	0.169	1.07953e-46
ARHGAP12	1.01332e-50	0.298765	0.113	0.064	3.13389e-46
CARNS1	3.18524e-50	-0.478757	0.312	0.368	9.85099e-46
MT2A	6.73685e-50	0.320784	0.306	0.225	2.08351e-45
S100B	9.29746e-49	-0.589888	0.392	0.429	2.87542e-44
LDLRAD3	1.37446e-48	0.307922	0.178	0.116	4.2508e-44
ZFYVE16	9.4601e-47	-0.409613	0.413	0.455	2.92573e-42
LINC00609	1.53441e-45	-0.372838	0.416	0.468	4.74547e-41
CMTM5	1.69758e-44	-0.497517	0.178	0.233	5.25011e-40
LINC01877	3.46021e-44	-0.428997	0.1	0.151	1.07014e-39
S100A1	4.3376e-43	-0.472377	0.064	0.107	1.34149e-38
RNASE1	5.61011e-41	-0.539933	0.442	0.465	1.73504e-36
EFCAB11	1.48237e-40	-0.40206	0.071	0.114	4.58451e-36
PTN	1.39831e-38	-0.480503	0.256	0.304	4.32454e-34
AC079352.1	1.80189e-37	-0.404504	0.249	0.304	5.57272e-33
GLDN	1.53671e-35	-0.402146	0.278	0.324	4.75258e-31
PTPN13	2.06103e-35	0.272757	0.288	0.223	6.37415e-31
PPP1R14A	8.21346e-35	-0.551733	0.485	0.486	2.54018e-30
AC090015.1	1.39712e-34	-0.404362	0.205	0.256	4.32088e-30
GREB1L	5.47118e-34	-0.388186	0.175	0.225	1.69207e-29
DOCK3	1.02086e-33	-0.301517	0.489	0.516	3.15722e-29
RFX3-AS1	1.21697e-33	-0.40264	0.103	0.146	3.76373e-29
FHIT	1.58668e-33	-0.269939	0.523	0.561	4.90713e-29
ICA1L	5.14251e-33	-0.319149	0.07	0.109	1.59042e-28
AC020909.2	3.00608e-32	-0.51789	0.12	0.162	9.29689e-28
DANT2	9.54722e-32	-0.391349	0.101	0.143	2.95267e-27
NDUFA4	2.15838e-31	-0.397295	0.197	0.244	6.67523e-27
KALRN	2.75419e-31	-0.41066	0.065	0.101	8.51787e-27
SLC4A8	5.03038e-31	-0.45786	0.206	0.249	1.55575e-26
KCNH1	9.4758e-31	-0.314361	0.085	0.125	2.93058e-26
LDB3	1.05377e-29	-0.409781	0.237	0.279	3.25898e-25
LINGO1	7.81965e-29	-0.503531	0.12	0.159	2.41838e-24
GPM6A	1.4133e-28	-0.360828	0.078	0.114	4.3709e-24
CNTNAP2	5.34297e-28	0.252044	0.536	0.477	1.65242e-23
AGPAT4	5.91996e-28	-0.384247	0.279	0.317	1.83087e-23
CIRBP	2.70341e-27	-0.385794	0.233	0.274	8.36084e-23
KCNH8	4.20579e-27	-0.285186	0.541	0.55	1.30072e-22
AC006001.2	1.45237e-26	-0.323745	0.09	0.127	4.49175e-22
LINC00342	1.54336e-26	-0.327691	0.082	0.118	4.77315e-22
TYMSOS	1.72513e-26	-0.343593	0.088	0.124	5.3353e-22
AC092924.2	1.93785e-26	-0.318792	0.113	0.152	5.99318e-22
DAB1	1.83642e-23	-0.445192	0.072	0.103	5.67951e-19
PPFIA2	1.84729e-23	-0.32237	0.344	0.378	5.71312e-19
SPANXA2-OT1	2.64611e-23	-0.275232	0.074	0.106	8.18361e-19
AC007364.1	2.84977e-22	-0.278922	0.105	0.14	8.81348e-18
POLR2F	7.10817e-22	-0.267783	0.481	0.497	2.19834e-17
NEK3	2.36176e-20	-0.33125	0.145	0.18	7.30423e-16
TPPP3	2.9913e-20	-0.321899	0.1	0.131	9.25121e-16
GRM7	7.22424e-20	-0.305673	0.072	0.1	2.23424e-15
AK5	1.36614e-19	-0.290762	0.449	0.467	4.22506e-15
EMC10	2.57673e-19	-0.512673	0.25	0.276	7.96905e-15
ATP5IF1	4.78758e-19	-0.308738	0.11	0.142	1.48066e-14
AC104596.1	6.18509e-19	-0.300779	0.096	0.126	1.91286e-14
ENOSF1	6.85798e-19	-0.329149	0.172	0.206	2.12097e-14
NDUFC2	7.21055e-19	-0.342096	0.169	0.203	2.23001e-14
ATP5MD	1.63673e-18	-0.27884	0.116	0.149	5.06191e-14
NDUFB2	2.89152e-18	-0.374951	0.175	0.206	8.9426e-14
LINC00174	1.04899e-17	-0.255055	0.095	0.125	3.2442e-13
MACROD2	1.63838e-17	-0.332948	0.119	0.15	5.06702e-13
ACTN2	2.19496e-17	-0.292241	0.105	0.134	6.78834e-13
TMEM125	2.21171e-17	-0.328209	0.121	0.151	6.84016e-13
AC079781.5	2.54078e-17	-0.275345	0.091	0.12	7.85789e-13
GMDS-DT	2.62568e-17	-0.291971	0.103	0.133	8.12043e-13
PLA2G4C	3.04744e-17	-0.296327	0.207	0.24	9.42482e-13
COX6C	8.22939e-17	-0.313099	0.169	0.2	2.5451e-12
IFT80	1.0219e-16	-0.317053	0.282	0.309	3.16044e-12
NDUFA11	1.3997e-16	-0.289394	0.118	0.148	4.32886e-12
POC1B	2.56736e-16	-0.307392	0.137	0.167	7.94008e-12
NAV3	8.22299e-16	-0.377677	0.158	0.185	2.54312e-11
NEGR1	1.21372e-15	-0.274589	0.233	0.265	3.75368e-11
FTCDNL1	1.57721e-15	-0.28983	0.109	0.137	4.87785e-11
SNAP25	4.06785e-15	-0.313966	0.111	0.139	1.25806e-10
PLEKHA5	1.21067e-14	-0.252787	0.089	0.115	3.74425e-10
CASTOR3	1.30519e-14	-0.327065	0.213	0.239	4.03656e-10
PTCSC3	1.3439e-13	-0.30587	0.093	0.116	4.15629e-09
PHACTR1	2.79382e-13	-0.29339	0.161	0.188	8.64045e-09
C1orf122	3.99317e-13	-0.316882	0.206	0.231	1.23497e-08
SLC16A1-AS1	5.08967e-13	-0.29184	0.127	0.153	1.57408e-08
RORA	5.90129e-13	-0.336442	0.151	0.176	1.82509e-08
PSEN1	6.43461e-13	-0.252849	0.44	0.445	1.99003e-08
PSD3	6.8332e-13	-0.258801	0.375	0.389	2.1133e-08
BABAM2	8.09632e-13	-0.260104	0.113	0.138	2.50395e-08
SRGAP3	8.76191e-13	-0.300451	0.123	0.147	2.7098e-08
ITGA2	1.478e-12	-0.303425	0.254	0.276	4.57101e-08
CPB2-AS1	2.0247e-12	-0.293131	0.288	0.307	6.26179e-08
ENTPD1-AS1	2.69734e-12	-0.32162	0.153	0.177	8.34205e-08
RPS29	3.75759e-12	-0.305386	0.316	0.333	1.16211e-07
SLX4IP	5.27628e-12	-0.251598	0.106	0.13	1.6318e-07
NENF	5.48906e-12	-0.346046	0.25	0.269	1.6976e-07
PAAF1	5.70462e-12	-0.253157	0.107	0.131	1.76427e-07
UBB	7.70546e-12	-0.309455	0.376	0.38	2.38307e-07
SPCS1	5.23551e-11	-0.257012	0.133	0.156	1.61919e-06
PET100	5.61849e-11	-0.257769	0.123	0.147	1.73763e-06
POLR2J3	6.49335e-11	-0.314443	0.118	0.139	2.0082e-06
SLC13A3	1.10491e-10	-0.282735	0.165	0.187	3.41714e-06
RPL10A	1.5232e-10	-0.292283	0.145	0.167	4.71079e-06
GRIA2	1.77229e-10	-0.26596	0.31	0.326	5.48116e-06
RUFY2	1.87253e-10	-0.256139	0.236	0.257	5.79118e-06
LRRC4C	5.62197e-10	-0.309941	0.212	0.231	1.73871e-05
NPDC1	9.84464e-10	-0.267612	0.083	0.102	3.04465e-05
SPARCL1	1.1189e-09	-0.290711	0.123	0.143	3.46042e-05
AL158077.2	1.39658e-09	-0.296	0.097	0.116	4.31922e-05
ATP5F1E	1.65062e-09	-0.291912	0.282	0.296	5.10488e-05
ASPA	5.51504e-09	-0.29697	0.349	0.353	0.000170564
SVEP1	6.51717e-09	-0.267946	0.152	0.173	0.000201557
ROGDI	2.02954e-08	-0.259846	0.176	0.195	0.000627674
NDUFA3	2.41418e-08	-0.287013	0.187	0.206	0.000746634
SPATA22	4.49322e-08	-0.299641	0.141	0.158	0.00138962
AL391807.1	6.1479e-08	-0.256166	0.125	0.142	0.00190136
ZKSCAN1	1.67544e-07	-0.26735	0.306	0.314	0.00518163
ATP5ME	2.23532e-07	-0.27269	0.361	0.365	0.00691318
SRP14	5.77404e-07	-0.296348	0.264	0.274	0.0178574
RPS26	1.62284e-06	-0.259127	0.279	0.29	0.0501894
COX4I1	4.46348e-06	-0.260237	0.232	0.243	0.138042
SEC62	1.16989e-05	-0.268032	0.291	0.295	0.361812
AC018647.1	0.000130907	-0.256165	0.163	0.173	1
TMEM258	0.0166487	-0.251711	0.304	0.297	1
WASHC1	0.000168696	-0.252359	0.118	0.128	1

## Sheet: Mic_AD_logNorm_diffEx
gene	p_val	avg_log2FC	pct.1	pct.2	p_val_adj
MALAT1	1.34461e-137	-0.840464	0.999	1	4.15846e-133
DPYD	1.97913e-86	1.33275	0.597	0.246	6.12085e-82
FOXP1	1.36394e-59	1.07343	0.558	0.28	4.21827e-55
SPP1	2.97133e-58	0.345408	0.824	0.528	9.18944e-54
FKBP5	1.12438e-43	0.731714	0.73	0.498	3.47737e-39
AC008050.1	6.52743e-37	-1.43062	0.042	0.186	2.01874e-32
APOE	6.20447e-36	0.878459	0.492	0.275	1.91886e-31
AC011586.2	3.81391e-35	-1.268	0.005	0.107	1.17953e-30
NEAT1	9.81641e-35	0.502742	0.931	0.822	3.03592e-30
SIPA1L1	1.56667e-34	0.911947	0.477	0.273	4.84523e-30
AC008691.1	2.37058e-33	-1.35987	0.136	0.3	7.33149e-29
LINC02712	2.43734e-33	-1.10937	0.119	0.286	7.53796e-29
RASGEF1C	8.22029e-32	-1.00949	0.283	0.462	2.54229e-27
HIF1A	2.27171e-31	0.795949	0.431	0.239	7.0257e-27
PADI2	1.09744e-30	0.802345	0.399	0.212	3.39404e-26
HIF1A-AS3	2.37997e-25	1.0834	0.272	0.128	7.36054e-21
LINC02397	5.14381e-25	0.754473	0.108	0.017	1.59083e-20
SRGAP2B	6.80249e-24	-0.704249	0.589	0.702	2.10381e-19
LINC02642	9.18396e-24	-1.10799	0.044	0.148	2.84032e-19
DDIT4	1.09848e-23	0.794965	0.2	0.074	3.39727e-19
TRPS1	1.17733e-23	0.773793	0.372	0.21	3.64112e-19
PTPRG	2.84154e-23	1.34255	0.186	0.068	8.78803e-19
SMIM35	6.01912e-23	0.757808	0.13	0.032	1.86153e-18
OXR1	6.0621e-23	0.761455	0.626	0.494	1.87483e-18
DOCK5	9.2985e-23	0.707231	0.313	0.162	2.87575e-18
LNCAROD	4.01082e-22	0.557445	0.614	0.456	1.24043e-17
SSH2	1.13815e-21	0.417711	0.813	0.688	3.51995e-17
LINC01684	2.3108e-21	0.667871	0.23	0.101	7.1466e-17
CX3CR1	3.13177e-21	-0.92071	0.275	0.41	9.68561e-17
AL163541.1	5.37201e-21	0.618414	0.413	0.245	1.6614e-16
AC131944.1	1.01438e-19	0.484029	0.434	0.258	3.13717e-15
ALCAM	1.24495e-19	0.72167	0.349	0.206	3.85025e-15
DTNA	2.43759e-19	0.549072	0.449	0.288	7.53873e-15
SCIN	6.42768e-19	0.642283	0.33	0.188	1.98789e-14
ZBTB16	1.24114e-18	0.500966	0.287	0.15	3.83846e-14
MITF	1.36708e-18	0.586812	0.245	0.12	4.22796e-14
KANK1	1.52552e-18	-0.882853	0.032	0.113	4.71799e-14
CERNA2	2.54e-18	0.815836	0.106	0.028	7.85547e-14
HSPA1A	5.3078e-18	-0.749935	0.23	0.363	1.64154e-13
PRKY	2.27131e-17	0.384444	0.138	0.047	7.02449e-13
MYO1E	1.3931e-16	0.687252	0.273	0.151	4.30843e-12
AC103591.3	1.6663e-16	-0.675999	0.031	0.105	5.15336e-12
FAM13A	4.92066e-16	0.570484	0.379	0.245	1.52181e-11
NHSL1	8.55056e-16	0.622905	0.366	0.233	2.64443e-11
SLC6A6	1.27124e-15	0.479795	0.131	0.048	3.93156e-11
GLDN	1.31531e-15	0.605258	0.409	0.275	4.06787e-11
HSPA1B	1.81197e-15	-0.708408	0.108	0.209	5.60387e-11
ETV6	2.28925e-15	0.443	0.638	0.506	7.07997e-11
GALNT2	3.12958e-15	0.48149	0.508	0.373	9.67886e-11
ESR1	4.63287e-15	0.44215	0.102	0.031	1.43281e-10
SLC38A2	7.21442e-15	0.437945	0.293	0.17	2.2312e-10
HDAC9	9.57759e-15	0.445638	0.685	0.57	2.96206e-10
LINC02742	1.14941e-14	-0.839688	0.071	0.156	3.55478e-10
TBC1D5	1.17075e-14	0.379144	0.666	0.531	3.62078e-10
ARHGAP15	1.64604e-14	0.385714	0.638	0.512	5.09071e-10
C22orf34	1.8102e-14	0.411492	0.144	0.058	5.59841e-10
MT-ND3	2.70197e-14	0.614938	0.329	0.213	8.35639e-10
LHFPL2	3.47469e-14	0.412113	0.651	0.515	1.07462e-09
TMEM51	3.85757e-14	0.524822	0.196	0.098	1.19303e-09
AC106865.2	5.01091e-14	0.582567	0.138	0.057	1.54972e-09
FRMD4A	5.40389e-14	-0.352764	0.875	0.911	1.67126e-09
ELL2	5.81997e-14	0.546294	0.454	0.327	1.79994e-09
PHC2	8.00273e-14	0.453084	0.379	0.25	2.475e-09
LINC00278	1.20616e-13	0.433187	0.189	0.091	3.73029e-09
ZNF292	1.33772e-13	0.392781	0.412	0.276	4.13718e-09
GNAQ	1.76441e-13	0.273896	0.743	0.616	5.4568e-09
FRMD4B	1.88956e-13	0.36415	0.456	0.322	5.84385e-09
MT-ND1	1.95265e-13	0.516203	0.299	0.185	6.03896e-09
ZNF804A	2.39764e-13	0.54009	0.11	0.039	7.41518e-09
SLA	2.62763e-13	0.546055	0.272	0.166	8.12647e-09
GRID2	2.64916e-13	-0.51391	0.204	0.318	8.19306e-09
SAMD4A	2.89451e-13	0.437154	0.25	0.141	8.95186e-09
KCNIP4	4.00976e-13	-0.760283	0.127	0.221	1.2401e-08
LRMDA	4.12937e-13	0.26348	0.914	0.89	1.27709e-08
PDK1	4.19956e-13	0.502567	0.161	0.077	1.2988e-08
TNFAIP8	4.41914e-13	0.58493	0.18	0.09	1.36671e-08
ACSL1	4.73183e-13	0.574724	0.345	0.232	1.46341e-08
MEG3	5.96196e-13	-0.809857	0.089	0.175	1.84385e-08
CCND3	6.35253e-13	0.417058	0.362	0.233	1.96465e-08
RASGRP3	6.86518e-13	0.390062	0.138	0.059	2.12319e-08
AC066613.2	7.21312e-13	0.373062	0.171	0.083	2.2308e-08
NAV2	7.90593e-13	-0.786181	0.117	0.206	2.44507e-08
ARRB2	8.12086e-13	0.326631	0.3	0.182	2.51154e-08
GSN	8.19806e-13	0.427332	0.403	0.275	2.53541e-08
P4HA1	9.84345e-13	0.491425	0.398	0.272	3.04428e-08
KDM3A	1.24237e-12	0.475851	0.159	0.076	3.84228e-08
DPYD-AS1	1.28876e-12	0.546241	0.115	0.045	3.98576e-08
CYP27A1	1.30821e-12	0.420259	0.125	0.051	4.04591e-08
ATF7IP	1.32162e-12	0.369991	0.359	0.239	4.08737e-08
ANOS1	1.66153e-12	0.55835	0.284	0.181	5.13862e-08
MT-ND2	1.88698e-12	0.431536	0.275	0.167	5.83587e-08
TBC1D16	2.1172e-12	0.489087	0.234	0.135	6.54787e-08
LINC00578	2.47195e-12	0.462097	0.129	0.056	7.64501e-08
ARHGAP6	2.72591e-12	0.38588	0.354	0.232	8.43042e-08
DARS	4.52187e-12	0.469867	0.249	0.149	1.39848e-07
FAM53B	4.67961e-12	0.344586	0.294	0.181	1.44726e-07
PTPN14	5.64223e-12	-0.557273	0.04	0.104	1.74497e-07
ADGRE2	7.57051e-12	0.529481	0.123	0.054	2.34133e-07
PFKP	7.67032e-12	0.488861	0.107	0.042	2.3722e-07
NFIC	8.43349e-12	0.340432	0.343	0.224	2.60823e-07
SLC29A1	8.89577e-12	0.426341	0.105	0.041	2.75119e-07
SLC7A5	9.13201e-12	0.433128	0.116	0.049	2.82426e-07
ETS2	1.10591e-11	0.382074	0.259	0.157	3.42024e-07
TBL1XR1	1.13742e-11	0.344	0.537	0.41	3.5177e-07
MRC1	1.21434e-11	-0.613556	0.086	0.166	3.75558e-07
SLC11A1	1.27645e-11	0.460593	0.334	0.224	3.94768e-07
FMN1	1.28812e-11	0.277109	0.554	0.416	3.98378e-07
NEDD9	1.90115e-11	0.513304	0.156	0.078	5.87968e-07
GTDC1	1.90291e-11	0.452479	0.322	0.213	5.88514e-07
ANKRD12	1.95407e-11	0.342025	0.377	0.256	6.04337e-07
CTSD	2.49485e-11	0.486107	0.254	0.156	7.71583e-07
RASA2	2.58054e-11	0.428082	0.264	0.164	7.98084e-07
SOCS6	3.03602e-11	0.42678	0.409	0.289	9.38949e-07
FCGBP	3.22922e-11	0.750663	0.277	0.181	9.987e-07
APOC1	3.34223e-11	0.576012	0.162	0.083	1.03365e-06
FGD4	3.70785e-11	0.326414	0.674	0.565	1.14673e-06
TNFRSF1B	3.83034e-11	0.365536	0.298	0.193	1.18461e-06
ARID5B	4.61855e-11	0.508683	0.168	0.089	1.42838e-06
PHF21A	4.75723e-11	0.365469	0.369	0.254	1.47127e-06
ARAP1	6.15516e-11	0.336831	0.199	0.11	1.90361e-06
RNASET2	6.73859e-11	0.321107	0.722	0.621	2.08404e-06
PKM	7.96488e-11	0.517841	0.228	0.14	2.4633e-06
MAN2A1	8.01309e-11	0.443718	0.38	0.27	2.47821e-06
OGFRL1	9.31013e-11	0.339405	0.313	0.206	2.87934e-06
EGLN1	9.37418e-11	0.325215	0.215	0.122	2.89915e-06
MALT1	9.93824e-11	0.417853	0.16	0.082	3.0736e-06
PPARD	1.15142e-10	0.404631	0.383	0.272	3.561e-06
MT-ND4	1.17652e-10	0.408665	0.33	0.226	3.63862e-06
DST	1.32196e-10	0.353376	0.439	0.319	4.08841e-06
CPVL	1.38667e-10	0.288757	0.337	0.224	4.28854e-06
EAF2	1.45219e-10	0.418223	0.151	0.078	4.4912e-06
RPS6KA3	1.5419e-10	0.385088	0.388	0.277	4.76865e-06
LRRFIP1	1.61473e-10	0.371253	0.327	0.22	4.99388e-06
COMMD10	2.01033e-10	0.395217	0.397	0.29	6.21735e-06
CDK6	2.01636e-10	0.413132	0.33	0.223	6.236e-06
ATG16L2	2.92912e-10	0.274834	0.227	0.133	9.0589e-06
IQGAP2	3.09696e-10	0.340302	0.107	0.045	9.57797e-06
P2RY13	3.77455e-10	-0.724127	0.118	0.194	1.16735e-05
FNDC3B	3.93259e-10	0.353119	0.382	0.272	1.21623e-05
NFAT5	4.02075e-10	0.299314	0.377	0.261	1.2435e-05
ANP32A	4.42653e-10	0.326878	0.296	0.194	1.36899e-05
BMP2K	4.58402e-10	0.334735	0.717	0.621	1.4177e-05
CPM	4.77759e-10	0.710434	0.225	0.14	1.47757e-05
GBE1	4.81219e-10	0.561234	0.209	0.126	1.48827e-05
CDC42SE2	5.40034e-10	0.344254	0.361	0.252	1.67016e-05
RBFOX1	6.50845e-10	-0.698374	0.137	0.218	2.01287e-05
FNDC3A	7.02699e-10	0.397828	0.362	0.254	2.17324e-05
LIMS1	7.37984e-10	0.356102	0.432	0.319	2.28236e-05
ARL5A	7.38497e-10	0.308541	0.329	0.225	2.28395e-05
HCLS1	8.02875e-10	0.301233	0.385	0.275	2.48305e-05
CCDC91	8.41174e-10	0.299693	0.36	0.247	2.6015e-05
ADAM17	8.55188e-10	0.391901	0.269	0.177	2.64484e-05
WDR7	9.41761e-10	0.344145	0.313	0.212	2.91258e-05
LINC01909	1.25587e-09	0.314355	0.101	0.043	3.88402e-05
ABCA1	1.26872e-09	0.260941	0.132	0.064	3.92378e-05
PBX3	1.30963e-09	0.438775	0.238	0.151	4.0503e-05
MGAT1	1.32267e-09	0.419499	0.195	0.114	4.09061e-05
AL035446.2	1.48807e-09	0.568622	0.147	0.077	4.60215e-05
ARHGAP18	1.6029e-09	0.418891	0.184	0.107	4.95728e-05
TAB2	1.90501e-09	0.342283	0.559	0.45	5.89162e-05
PGK1	2.26264e-09	0.428357	0.251	0.166	6.99766e-05
ASAP1	2.27234e-09	0.395008	0.32	0.224	7.02766e-05
SDCBP	2.37843e-09	0.354523	0.179	0.103	7.35576e-05
CAB39	2.81902e-09	0.33402	0.396	0.289	8.71838e-05
EPS15	2.8863e-09	0.365258	0.417	0.31	8.92647e-05
RAP1A	2.93771e-09	0.283284	0.512	0.401	9.08547e-05
PTPRJ	3.00997e-09	0.287044	0.72	0.613	9.30894e-05
LINC01091	3.07244e-09	-0.630445	0.085	0.151	9.50213e-05
DLG2	3.36276e-09	-0.575618	0.2	0.283	0.000104
PPARG	3.37047e-09	0.417787	0.153	0.083	0.000104239
PELI1	3.40269e-09	0.379256	0.405	0.302	0.000105235
PDE4D	4.41886e-09	-0.597321	0.146	0.223	0.000136662
UTRN	5.15992e-09	0.388888	0.354	0.254	0.000159581
FLT1	5.17961e-09	0.573689	0.104	0.049	0.00016019
TMED8	5.28252e-09	0.433226	0.136	0.072	0.000163372
DIRC3	5.41274e-09	0.48762	0.114	0.055	0.0001674
RASA1	6.15591e-09	0.347651	0.446	0.342	0.000190384
E2F3	6.58528e-09	0.399394	0.275	0.187	0.000203663
HECA	6.99761e-09	0.327007	0.157	0.087	0.000216415
RAB20	7.28053e-09	0.260348	0.102	0.046	0.000225165
EPS8	8.40478e-09	0.36388	0.412	0.305	0.000259935
ZNF124	8.51733e-09	0.411813	0.202	0.126	0.000263415
ASCC3	8.53831e-09	0.335942	0.334	0.237	0.000264064
DENND3	9.33533e-09	0.294393	0.619	0.496	0.000288714
SERTAD2	1.02114e-08	0.296635	0.166	0.093	0.000315807
PPP1R12A	1.0527e-08	0.26059	0.36	0.254	0.000325568
TPRG1	1.05376e-08	0.828147	0.123	0.065	0.000325897
CD81	1.11022e-08	0.465228	0.365	0.273	0.000343358
BAZ2B	1.41213e-08	0.309059	0.531	0.423	0.000436728
SKAP2	1.44361e-08	0.299894	0.587	0.481	0.000446466
UBXN2B	1.45462e-08	0.318965	0.183	0.11	0.000449871
PARP8	1.52116e-08	0.414193	0.362	0.262	0.000470449
PREX1	1.57696e-08	0.277129	0.65	0.546	0.000487706
TANC2	1.58819e-08	0.340979	0.435	0.333	0.00049118
RGS1	1.64529e-08	0.438807	0.247	0.162	0.00050884
AKR1B1	1.65257e-08	0.416741	0.108	0.053	0.000511092
ATP6V1B2	1.78709e-08	0.310693	0.217	0.137	0.000552694
PABPC1	2.01483e-08	-0.399084	0.655	0.67	0.000623127
USP15	2.06399e-08	0.32585	0.503	0.396	0.000638329
CCNI	2.09298e-08	0.358749	0.219	0.141	0.000647297
BNIP3L	2.11179e-08	0.278364	0.211	0.133	0.000653112
JARID2	2.138e-08	0.301885	0.294	0.2	0.000661218
STARD13	2.15173e-08	0.313932	0.247	0.161	0.000665465
ERCC6	2.19131e-08	0.347866	0.137	0.075	0.000677707
TNPO1	2.21655e-08	0.281002	0.247	0.162	0.000685514
KLHL6	2.2283e-08	0.34179	0.156	0.088	0.000689145
STAB1	2.3022e-08	0.575038	0.264	0.185	0.000712002
HK2	2.42521e-08	0.392654	0.225	0.149	0.000750045
MT2A	2.66303e-08	0.618193	0.121	0.064	0.000823596
VASH1	2.83266e-08	0.276628	0.273	0.184	0.000876056
GPATCH2L	3.06331e-08	0.315464	0.246	0.162	0.000947391
ZEB2	3.20716e-08	0.308681	0.653	0.563	0.000991877
FAM110B	3.2761e-08	0.398701	0.147	0.083	0.0010132
MSN	3.58265e-08	0.293556	0.272	0.184	0.001108
SOAT1	3.88431e-08	0.292914	0.257	0.173	0.0012013
RPS15A	4.01583e-08	-0.529541	0.099	0.163	0.00124197
CORO1C	4.0642e-08	0.299873	0.227	0.148	0.00125694
APMAP	4.28838e-08	0.26251	0.267	0.179	0.00132627
PRKCH	4.66079e-08	0.33557	0.27	0.184	0.00144144
CYTH1	4.73351e-08	0.264347	0.316	0.224	0.00146393
IQGAP1	4.97309e-08	0.337003	0.147	0.083	0.00153803
DISP1	5.08628e-08	0.314534	0.383	0.285	0.00157303
UNC5C	5.27067e-08	-0.552677	0.059	0.113	0.00163006
ST8SIA4	5.32352e-08	0.333626	0.369	0.275	0.00164641
ZMIZ1	5.86371e-08	0.260148	0.177	0.106	0.00181347
CD74	7.01395e-08	-0.399555	0.602	0.64	0.00216921
SNX27	7.26944e-08	0.323774	0.243	0.163	0.00224822
GAS7	7.75544e-08	0.29457	0.272	0.185	0.00239853
CHST15	8.08396e-08	0.305158	0.272	0.185	0.00250013
P2RY12	8.32788e-08	-0.549633	0.402	0.467	0.00257556
SUCLG2	8.71835e-08	0.380003	0.365	0.276	0.00269633
NINJ1	8.80091e-08	0.325055	0.181	0.11	0.00272186
NAALADL2	9.43539e-08	-0.564694	0.199	0.272	0.00291808
TLR2	1.00502e-07	0.348744	0.43	0.332	0.00310824
OLR1	1.06036e-07	-0.918909	0.235	0.293	0.00327937
ZMAT3	1.11641e-07	0.265507	0.269	0.184	0.00345271
LRBA	1.20598e-07	0.280231	0.387	0.293	0.00372973
PDE3B	1.23282e-07	0.383888	0.379	0.283	0.00381275
ELF1	1.24532e-07	0.288347	0.353	0.26	0.00385141
ATP11A	1.28051e-07	0.251974	0.294	0.209	0.00396022
WNT5A	1.28142e-07	0.335027	0.155	0.092	0.00396305
AC007262.2	1.28597e-07	0.331529	0.195	0.123	0.00397711
STX6	1.31652e-07	0.344199	0.176	0.109	0.0040716
FAM198B-AS1	1.43113e-07	-0.519917	0.104	0.168	0.00442604
TNS3	1.54138e-07	0.324228	0.437	0.344	0.00476704
SOX5	1.56736e-07	-0.670316	0.085	0.141	0.00484738
ABHD3	1.65692e-07	0.315343	0.23	0.153	0.00512435
L3MBTL4	1.74456e-07	0.261246	0.359	0.264	0.00539539
ARID5A	2.02576e-07	0.40971	0.105	0.055	0.00626508
HIST1H2AC	2.02777e-07	-0.693474	0.193	0.256	0.00627129
NRXN3	2.11935e-07	-0.737971	0.119	0.181	0.00655451
RAD51B	2.19692e-07	0.302897	0.504	0.407	0.0067944
KCNQ3	2.47827e-07	-0.300725	0.709	0.732	0.00766455
IFNGR2	2.55705e-07	0.313194	0.38	0.289	0.0079082
SMYD3	2.60507e-07	0.281185	0.47	0.372	0.0080567
KCTD12	2.70163e-07	0.310239	0.294	0.212	0.00835532
SP100	3.24855e-07	0.283995	0.453	0.358	0.0100468
GALNT10	3.37783e-07	0.286421	0.261	0.182	0.0104466
AIDA	3.40708e-07	0.323522	0.21	0.139	0.0105371
ARHGAP20	3.44705e-07	0.411045	0.146	0.087	0.0106607
IRF2BP2	3.87462e-07	0.264736	0.126	0.07	0.011983
MICOS10	4.37528e-07	-0.549484	0.151	0.216	0.0135314
DYM	4.46379e-07	0.282282	0.362	0.267	0.0138052
MNDA	4.63263e-07	-0.403183	0.078	0.133	0.0143273
PTPRC	4.74392e-07	0.252609	0.619	0.516	0.0146715
INPPL1	4.83036e-07	0.29118	0.105	0.055	0.0149389
PTPN4	5.06788e-07	0.270609	0.119	0.065	0.0156734
CLEC16A	5.09734e-07	0.274881	0.23	0.154	0.0157646
CECR2	5.11965e-07	-0.44691	0.086	0.141	0.0158335
TET2	5.23728e-07	0.269224	0.345	0.256	0.0161973
NRP1	5.23815e-07	0.36884	0.166	0.104	0.0162
RASSF8	5.27383e-07	0.317944	0.454	0.362	0.0163104
AMPD3	5.61732e-07	0.279071	0.157	0.095	0.0173727
DSE	5.95422e-07	0.437501	0.228	0.159	0.0184146
CUX1	7.03261e-07	0.264362	0.469	0.372	0.0217497
FOXN2	7.37079e-07	0.277895	0.195	0.128	0.0227956
POU2F2	7.77309e-07	0.285326	0.336	0.247	0.0240398
CHSY1	7.94292e-07	0.258694	0.313	0.23	0.0245651
FOXJ3	8.56302e-07	0.29708	0.236	0.164	0.0264829
AUH	8.66884e-07	0.256294	0.193	0.125	0.0268101
CTNNA3	8.73832e-07	-0.441263	0.099	0.157	0.027025
AGTPBP1	9.13175e-07	0.300041	0.265	0.19	0.0282418
ASPH	9.26067e-07	0.30182	0.178	0.114	0.0286405
MS4A7	1.0329e-06	0.320073	0.211	0.144	0.0319444
OPCML	1.13688e-06	-0.56826	0.067	0.116	0.0351604
RPS6KA2	1.23456e-06	0.305559	0.405	0.319	0.0381812
TIAM2	1.32527e-06	0.280078	0.209	0.139	0.0409867
FAM157C	1.55201e-06	-0.342538	0.06	0.108	0.0479989
SPOPL	1.58693e-06	0.292974	0.202	0.135	0.0490791
NGLY1	1.63583e-06	0.277108	0.161	0.101	0.0505914
EIF4A1	1.67263e-06	0.317097	0.269	0.196	0.0517294
RTN1	1.71172e-06	0.358501	0.122	0.071	0.0529385
CADM1	1.82611e-06	0.319032	0.128	0.075	0.056476
PDGFB	2.02811e-06	0.281251	0.254	0.178	0.0627232
CAMKMT	2.038e-06	0.253622	0.303	0.223	0.0630293
NUTM2B-AS1	2.04309e-06	0.302066	0.257	0.185	0.0631866
RTTN	2.10628e-06	0.266087	0.335	0.252	0.0651409
CORO1A	2.14136e-06	0.274733	0.196	0.132	0.0662258
RBMS1	2.21636e-06	0.328845	0.255	0.183	0.0685452
UBE2D2	2.27764e-06	0.256465	0.271	0.196	0.0704404
DENND1A	2.39803e-06	0.274786	0.452	0.358	0.0741638
UGCG	2.40156e-06	0.252795	0.266	0.192	0.0742729
KYNU	2.45644e-06	0.332387	0.189	0.126	0.0759704
RNF217	2.4642e-06	0.294177	0.163	0.105	0.0762102
MT-CO2	2.60231e-06	0.256551	0.369	0.287	0.0804817
HIST2H2BF	2.87773e-06	-0.370801	0.154	0.218	0.0889996
RPS10	3.0519e-06	-0.32768	0.093	0.147	0.0943863
LRRTM4	3.13344e-06	-0.565212	0.062	0.108	0.096908
FTL	3.21005e-06	0.396028	0.721	0.626	0.0992771
RNF145	3.42409e-06	0.252557	0.3	0.221	0.105897
JAK3	3.46401e-06	0.411478	0.175	0.117	0.107131
RNF150	3.48013e-06	0.318757	0.227	0.159	0.10763
BTG1	3.49515e-06	0.259979	0.117	0.068	0.108094
GMDS	3.52974e-06	0.272183	0.258	0.186	0.109164
RSU1	3.62741e-06	0.314304	0.146	0.092	0.112185
CEBPD	3.64754e-06	0.342202	0.189	0.128	0.112808
DMXL2	3.8835e-06	0.291217	0.217	0.152	0.120105
SH3RF1	4.19431e-06	0.251975	0.145	0.09	0.129717
SEC14L1	4.65179e-06	0.267921	0.245	0.176	0.143866
IL6ST	4.85685e-06	-0.381805	0.451	0.5	0.150208
CLU	4.96995e-06	0.266248	0.24	0.168	0.153706
LILRB4	5.31258e-06	-0.513811	0.111	0.163	0.164302
ARHGAP45	5.46204e-06	0.299344	0.128	0.078	0.168924
PRKCB	6.1808e-06	0.271315	0.384	0.304	0.191153
MIR181A1HG	6.46206e-06	0.29247	0.153	0.099	0.199852
GAS6	6.46318e-06	0.284936	0.212	0.149	0.199887
ATP1B3	6.73363e-06	0.279057	0.155	0.099	0.208251
BCAT1	6.94383e-06	0.316315	0.199	0.139	0.214752
MLXIPL	7.0871e-06	0.285113	0.208	0.143	0.219183
CCDC26	7.08755e-06	0.407062	0.252	0.185	0.219197
ITPR1	7.14644e-06	0.263905	0.266	0.194	0.221018
GPR183	7.53545e-06	-0.783426	0.078	0.124	0.233049
SLC16A3	7.75869e-06	0.336966	0.202	0.144	0.239953
LAT2	8.8159e-06	0.264724	0.388	0.305	0.272649
LAMP2	8.8316e-06	0.282583	0.166	0.109	0.273135
RAB5A	9.06078e-06	0.270613	0.146	0.094	0.280223
AC120193.1	9.10298e-06	-0.455454	0.302	0.36	0.281528
PRKCE	9.1307e-06	0.283995	0.218	0.155	0.282385
SDK1	9.91738e-06	0.349682	0.493	0.417	0.306715
STAT3	1.01569e-05	0.280347	0.312	0.237	0.314122
TNFSF13B	1.2479e-05	0.315317	0.125	0.078	0.385939
AL034397.3	1.34465e-05	-0.393674	0.208	0.268	0.41586
LINC00472	1.50445e-05	0.262855	0.125	0.076	0.46528
PLSCR1	1.65729e-05	0.317981	0.241	0.178	0.51255
SEC24D	1.75394e-05	0.295258	0.153	0.102	0.542441
LRRC8D	1.87267e-05	0.267243	0.287	0.217	0.579162
RPL34	2.05811e-05	-0.407223	0.232	0.287	0.636512
MCF2L2	2.08191e-05	-0.517582	0.123	0.173	0.643872
SCPEP1	2.09914e-05	0.250519	0.116	0.07	0.6492
KDM4B	2.18971e-05	0.290484	0.207	0.147	0.677212
EML4	2.76011e-05	-0.392873	0.341	0.391	0.85362
RNF144B	4.08195e-05	0.250263	0.186	0.131	1
MED12L	4.27383e-05	-0.50351	0.128	0.176	1
BTG2	4.51758e-05	-0.469339	0.097	0.142	1
KIF16B	4.87209e-05	0.288751	0.26	0.198	1
NCKAP5	4.99504e-05	-0.293287	0.271	0.333	1
LRRC4C	5.02398e-05	-0.434464	0.065	0.105	1
CDK19	5.5895e-05	0.252154	0.322	0.252	1
LINC01736	5.73532e-05	0.305428	0.147	0.099	1
SLC1A5	5.79711e-05	0.261058	0.113	0.071	1
KAZN	5.95828e-05	-0.506365	0.067	0.107	1
DLGAP1	6.07044e-05	-0.555946	0.096	0.139	1
CPPED1	7.48339e-05	0.274265	0.126	0.083	1
PRKAR1A	8.29428e-05	0.253948	0.113	0.072	1
IL1RAPL1	9.16693e-05	-0.298914	0.111	0.158	1
PDXK	0.00010496	0.280982	0.192	0.14	1
A2M	0.000110214	-0.409481	0.42	0.455	1
RPS13	0.00011818	-0.321949	0.133	0.183	1
CYBA	0.000126782	-0.515861	0.239	0.283	1
RPS27A	0.000128691	-0.390098	0.223	0.278	1
RNF24	0.000131077	0.263402	0.131	0.087	1
PHACTR2	0.000145218	0.278634	0.221	0.168	1
AL513327.1	0.00017445	0.288498	0.101	0.064	1
AP001977.1	0.000175509	0.403061	0.102	0.065	1
MT-ND5	0.00018891	0.271445	0.148	0.104	1
LINC01268	0.000286836	-0.312874	0.097	0.139	1
RPL21	0.000290511	-0.448013	0.182	0.227	1
LBR	0.000296242	0.259556	0.1	0.064	1
PABPC4	0.000303476	-0.410413	0.335	0.373	1
FCER1G	0.000345809	-0.313112	0.093	0.133	1
PDE4B	0.000356621	-0.319323	0.32	0.367	1
SNX10	0.000370021	0.308392	0.109	0.073	1
UST	0.000417714	0.261348	0.225	0.175	1
BTF3L4	0.000453366	-0.25364	0.092	0.131	1
CSMD1	0.000453699	-0.510089	0.11	0.149	1
PLD4	0.00069693	-0.393568	0.091	0.128	1
RORA	0.000813885	-0.360598	0.072	0.106	1
TMEM163	0.000828334	0.425463	0.242	0.197	1
ROBO2	0.000974681	-0.427481	0.074	0.108	1
DPP10	0.00114142	-0.377698	0.079	0.112	1
RPS12	0.00122733	-0.382317	0.178	0.218	1
OLFML3	0.00189389	-0.435616	0.076	0.107	1
RPS23	0.00190701	-0.346874	0.21	0.25	1
SYT1	0.00208979	-0.527227	0.139	0.174	1
KCNMB1	0.00232506	0.276245	0.123	0.09	1
AC025569.1	0.00254184	-0.337001	0.17	0.208	1
NRG3	0.00271282	-0.36816	0.089	0.122	1
GNA13	0.00283911	0.280008	0.229	0.186	1
SNX29	0.00294401	-0.25893	0.437	0.464	1
GPR34	0.00308163	-0.396344	0.204	0.242	1
TBC1D8	0.00309086	0.26121	0.2	0.162	1
PARD3B	0.0032619	-0.37508	0.086	0.116	1
PCDH9	0.0034496	-0.322234	0.171	0.208	1
ARL17B	0.00345061	-0.272191	0.076	0.106	1
LRP1B	0.00365844	-0.34578	0.106	0.138	1
C3	0.00378515	-0.257741	0.631	0.617	1
PPP2R2B	0.00396747	-0.373192	0.089	0.12	1
RPL10A	0.00406825	-0.252989	0.118	0.153	1
HMOX1	0.00417743	0.296292	0.109	0.08	1
PTPRD	0.00428916	-0.376823	0.118	0.15	1
RPS3A	0.00450766	-0.325664	0.16	0.195	1
CST3	0.00451558	-0.345316	0.268	0.304	1
KBTBD12	0.00454306	-0.423311	0.119	0.149	1
RPL35A	0.00481957	-0.280693	0.159	0.195	1
RPL29	0.00487781	-0.34783	0.178	0.21	1
TTC28	0.00609399	-0.303019	0.302	0.335	1
RPL10	0.00611668	-0.36316	0.338	0.361	1
RPS29	0.00700305	-0.282242	0.238	0.271	1
AP002336.2	0.00808697	0.268936	0.125	0.096	1
POLR2J3	0.00819014	-0.406092	0.143	0.172	1
RGS10	0.0084146	-0.345199	0.256	0.287	1
NAIP	0.00898773	-0.284167	0.264	0.3	1
RPL30	0.0107941	-0.340479	0.196	0.226	1
LPAR5	0.010859	-0.287794	0.129	0.157	1
RPL9	0.0113784	-0.284616	0.163	0.192	1
GPATCH2	0.0125348	-0.259301	0.102	0.13	1
RPL26	0.0140522	-0.251549	0.2	0.234	1
BCO2	0.0161672	-0.317977	0.095	0.12	1
GPCPD1	0.0163523	-0.35075	0.277	0.298	1
AC024145.1	0.0164275	-0.314513	0.101	0.128	1
PRKCA	0.0176821	-0.268486	0.497	0.495	1
ANKS1B	0.0181384	-0.402429	0.099	0.123	1
MEF2C-AS2	0.0190324	-0.290726	0.09	0.114	1
AIF1	0.0196429	-0.387114	0.157	0.183	1
AL157392.3	0.0198079	-0.270798	0.089	0.112	1
RPL41	0.0199097	-0.325621	0.392	0.404	1
AC012150.1	0.0202824	-0.298768	0.226	0.251	1
ITGA9	0.0208	-0.296192	0.202	0.227	1
ZMYND11	0.0209591	-0.26692	0.168	0.195	1
DIP2A	0.023008	-0.36513	0.254	0.273	1
ARHGAP12	0.0238921	-0.26308	0.429	0.441	1
AC006230.1	0.0239335	-0.290895	0.133	0.159	1
MAGI2	0.0312543	-0.404802	0.118	0.14	1
ANK3	0.034115	-0.419544	0.082	0.101	1
APOC2	0.0367603	-0.406681	0.219	0.239	1
SCAI	0.0406244	-0.337435	0.093	0.113	1
AL008633.1	0.0502729	-0.333211	0.175	0.198	1
RPL17	0.0538559	-0.263315	0.213	0.236	1
ERBB4	0.0591479	-0.290194	0.09	0.108	1
OSBPL6	0.0604005	-0.306715	0.108	0.126	1
RPS7	0.0607939	-0.250769	0.159	0.182	1
CSF3R	0.0618721	-0.255658	0.26	0.277	1
HMGN3	0.0650085	-0.295819	0.121	0.14	1
ADGRB3	0.0669844	-0.328166	0.189	0.208	1
SREBF2	0.0791912	-0.250762	0.176	0.194	1
FRMD5	0.0848464	-0.281928	0.088	0.105	1
CSF2RA	0.0896226	-0.294423	0.307	0.318	1
ARGLU1	0.0911992	-0.292912	0.236	0.251	1
LSAMP	0.0954576	-0.264609	0.12	0.137	1
CRLF3	0.104225	-0.27306	0.227	0.242	1
ID2	0.11963	-0.439954	0.102	0.117	1
TYROBP	0.125919	-0.297475	0.246	0.258	1
GARNL3	0.132891	-0.29072	0.155	0.169	1
LGMN	0.150184	-0.254336	0.111	0.126	1
DNM1	0.158456	-0.26104	0.091	0.104	1
ST3GAL5	0.159577	-0.317668	0.138	0.151	1
AZIN1-AS1	0.166698	-0.315718	0.112	0.125	1
KLHDC1	0.171998	-0.261071	0.108	0.12	1
ZNF846	0.179047	-0.340987	0.18	0.188	1
MRC2	0.190608	-0.267477	0.149	0.161	1
DLEU1	0.195975	-0.258655	0.663	0.645	1
GOSR1	0.196724	-0.33274	0.105	0.116	1
PTGDS	0.22502	-0.425182	0.14	0.149	1
SMIM14	0.230435	-0.276304	0.093	0.104	1
CNTNAP2	0.244116	-0.31813	0.157	0.168	1
B3GNT5	0.254306	-0.283881	0.17	0.179	1
RUBCNL	0.306258	-0.250157	0.285	0.286	1
ZDHHC14	0.313625	-0.268411	0.273	0.275	1
HTRA1	0.333811	-0.259595	0.279	0.284	1
NCAM1	0.334196	-0.25132	0.093	0.102	1
SLC2A3	0.33775	-0.668896	0.147	0.153	1
MFSD11	0.342442	-0.261617	0.137	0.144	1
BROX	0.349122	-0.289368	0.125	0.131	1
CRYAB	0.355004	-0.355082	0.097	0.104	1
C1QC	0.407308	-0.297814	0.326	0.317	1
HAMP	0.462747	-0.420872	0.187	0.188	1
SPIN1	0.517684	-0.261846	0.242	0.24	1
PMEPA1	0.538225	-0.274681	0.101	0.104	1
EML1	0.587184	-0.282263	0.109	0.111	1
DEPTOR	0.759533	-0.273378	0.15	0.147	1
C1QB	0.792261	-0.284224	0.477	0.429	1
FOXO1	0.871916	-0.30252	0.151	0.147	1
KCNMB2-AS1	0.88287	-0.290042	0.161	0.156	1
C1QA	0.98446	-0.263326	0.32	0.298	1

## Sheet: Inh_AD_logNorm_diffEx
gene	p_val	avg_log2FC	pct.1	pct.2	p_val_adj
MALAT1	4.66881e-132	-0.398493	1	1	1.44392e-127
PLP1	3.58319e-83	-0.758665	0.174	0.336	1.10817e-78
TF	2.50436e-59	-0.718981	0.096	0.208	7.74523e-55
ARL17B	1.10211e-48	-0.352016	0.063	0.156	3.40849e-44
MOBP	3.7372e-42	-0.497274	0.042	0.115	1.1558e-37
POLR2J3	3.14694e-39	-0.396191	0.158	0.262	9.73253e-35
AC105052.4	9.96654e-36	-0.361193	0.092	0.177	3.08235e-31
ST18	2.05866e-35	-0.476717	0.072	0.149	6.36681e-31
AC009041.2	1.00368e-34	-0.438991	0.164	0.261	3.10408e-30
CERCAM	1.80713e-33	-0.445942	0.132	0.224	5.58891e-29
EMC10	3.04833e-33	-0.463055	0.07	0.142	9.42756e-29
MOG	4.27424e-30	-0.433738	0.073	0.143	1.32189e-25
TMEM144	9.10327e-28	-0.373709	0.055	0.115	2.81537e-23
SLC7A14-AS1	2.05744e-27	-0.446706	0.084	0.151	6.36304e-23
PTGDS	3.01774e-27	-0.383666	0.219	0.311	9.33296e-23
MBP	9.14417e-27	-0.434826	0.285	0.372	2.82802e-22
PDE5A	2.43843e-24	-0.357804	0.216	0.301	7.54133e-20
PRPF4B	5.06492e-24	-0.35818	0.181	0.259	1.56643e-19
HNRNPDL	9.30288e-24	-0.315671	0.336	0.42	2.8771e-19
CNP	1.30004e-22	-0.391595	0.106	0.17	4.02064e-18
AC025159.1	2.07904e-22	-0.360797	0.228	0.305	6.42983e-18
KCNQ1OT1	2.1248e-20	-0.34638	0.127	0.192	6.57138e-16
AC110296.1	4.14437e-19	-0.317408	0.105	0.164	1.28173e-14
AC007563.2	7.41201e-19	-0.313287	0.116	0.176	2.29231e-14
LINC00342	7.92392e-19	-0.261628	0.219	0.294	2.45063e-14
RSRP1	1.104e-18	-0.321569	0.216	0.287	3.41434e-14
RNF220	1.81542e-18	-0.319574	0.192	0.262	5.61454e-14
NLGN4Y	1.18726e-17	-0.302906	0.168	0.233	3.67185e-13
SCD	1.25352e-17	-0.35845	0.057	0.101	3.87677e-13
USP9Y	1.62264e-17	-0.284669	0.172	0.236	5.01835e-13
LINGO2	5.85847e-17	-0.276189	0.382	0.46	1.81185e-12
DDX24	6.14379e-17	-0.325876	0.265	0.33	1.90009e-12
AC068587.4	6.94113e-17	-0.257096	0.266	0.333	2.14668e-12
CCDC144A	1.24918e-16	-0.268434	0.176	0.24	3.86334e-12
DDX18	1.59835e-16	-0.295985	0.093	0.144	4.94322e-12
NCKAP5	2.2762e-16	-0.311982	0.097	0.149	7.03959e-12
PTPRK	2.47164e-16	-0.320299	0.151	0.213	7.64404e-12
DPYD	3.39213e-16	-0.313884	0.136	0.193	1.04908e-11
UTY	8.93089e-16	-0.290477	0.115	0.166	2.76206e-11
BAIAP3	1.28186e-15	-0.262463	0.163	0.225	3.96441e-11
SLC44A1	1.41371e-14	-0.291791	0.29	0.352	4.37219e-10
SEC62	1.51075e-14	-0.303275	0.235	0.294	4.67231e-10
AC233296.1	1.48031e-13	-0.255048	0.236	0.297	4.57816e-09
AC002460.2	5.59259e-13	-0.273626	0.132	0.182	1.72962e-08
PIP4K2A	4.27025e-12	-0.291276	0.151	0.2	1.32066e-07
PTPRZ1	7.10632e-11	-0.25154	0.216	0.266	2.19777e-06
TUBA1A	5.33576e-10	-0.258845	0.175	0.219	1.65019e-05
APLP1	1.03468e-09	-0.252635	0.154	0.197	3.19996e-05
SRP14	1.19668e-08	-0.269618	0.198	0.24	0.000370096
CXCL14	9.50622e-08	-0.557794	0.154	0.193	0.00293999
IL1RAPL2	5.86137e-07	-0.265617	0.122	0.155	0.0181275
GFAP	1.35265e-55	0.614764	0.131	0.049	4.18334e-51
COL5A3	2.65404e-32	0.423127	0.121	0.058	8.20816e-28
AL627171.2	7.95891e-26	0.389371	0.164	0.099	2.46145e-21
XIST	1.70729e-22	0.284718	0.381	0.291	5.28015e-18
CPLX1	7.58391e-19	0.346118	0.3	0.231	2.34548e-14
AC119673.2	1.17481e-17	0.299051	0.144	0.094	3.63335e-13
SLC5A3	1.18103e-17	0.285732	0.217	0.158	3.65258e-13
PLEC	3.40916e-17	0.302097	0.224	0.163	1.05435e-12
ANKRD30BL	8.02255e-17	0.307503	0.383	0.311	2.48114e-12
SOX5	4.05252e-15	0.277051	0.527	0.465	1.25332e-10
PPM1E	1.18302e-14	0.254923	0.537	0.471	3.65872e-10
DGKD	1.41198e-14	0.302997	0.338	0.278	4.36683e-10
SPECC1	2.35875e-14	0.263259	0.412	0.349	7.29492e-10
DPH6-DT	3.70634e-14	0.316331	0.176	0.128	1.14626e-09
KCNT1	7.92182e-14	0.301676	0.325	0.268	2.44998e-09
TOGARAM2	1.47888e-13	0.289418	0.11	0.071	4.57372e-09
MT-ND1	4.75683e-13	0.264589	0.389	0.332	1.47114e-08
OPRD1	3.32111e-12	0.286189	0.166	0.121	1.02712e-07
CACNA2D2	3.95634e-12	0.260223	0.176	0.131	1.22358e-07
SGK1	3.39474e-11	0.313946	0.347	0.296	1.04989e-06
ZNF804A	3.64721e-11	0.278347	0.475	0.425	1.12797e-06
PKD1	4.03577e-11	0.251121	0.407	0.352	1.24814e-06
RUNX2	7.95418e-11	0.281119	0.246	0.198	2.45999e-06
STXBP5-AS1	1.02718e-10	0.283341	0.277	0.228	3.17675e-06
CFAP161	1.54761e-09	0.282665	0.25	0.207	4.78628e-05
HUNK	2.33775e-09	0.256119	0.192	0.152	7.22997e-05
NEAT1	9.11907e-06	0.322008	0.413	0.389	0.282025
TMEM132D	5.20503e-05	0.287858	0.421	0.396	1
RELN	0.000140457	-0.27119	0.149	0.175	1

## Sheet: Ex_AD_logNorm_diffEx
gene	p_val	avg_log2FC	pct.1	pct.2	p_val_adj
MALAT1	4.68926e-287	-0.416848	0.998	0.999	1.45025e-282
TF	4.12224e-148	-0.638731	0.099	0.248	1.27488e-143
PLP1	4.78889e-144	-0.573743	0.197	0.377	1.48106e-139
GFAP	1.4949e-134	0.599985	0.17	0.057	4.62327e-130
ARL17B	3.89369e-131	-0.385579	0.068	0.195	1.2042e-126
ADAMTS9-AS2	1.21655e-125	-0.608984	0.149	0.294	3.76243e-121
KCNMB2-AS1	1.80854e-111	-0.504169	0.251	0.411	5.59326e-107
CDH13	5.12218e-109	-0.503582	0.372	0.524	1.58414e-104
GRID2	1.24396e-108	-0.464646	0.546	0.672	3.84721e-104
AL627171.2	1.8802e-107	0.528921	0.216	0.102	5.8149e-103
POLR2J3	5.32334e-102	-0.352397	0.203	0.354	1.64635e-97
MOG	1.02794e-99	-0.468341	0.097	0.216	3.17912e-95
DPYD	2.98569e-97	-0.45496	0.486	0.609	9.23384e-93
DAB1	6.9614e-97	-0.353636	0.512	0.662	2.15295e-92
AP001977.1	1.04028e-96	0.471331	0.147	0.056	3.21726e-92
AC009041.2	3.56639e-95	-0.432341	0.475	0.62	1.10298e-90
CADPS2	2.72513e-93	0.441152	0.581	0.45	8.428e-89
CNTNAP2	1.00585e-91	0.277274	0.946	0.939	3.11079e-87
PDE5A	1.97912e-89	-0.421922	0.352	0.495	6.12082e-85
AC011287.1	4.69865e-85	-0.42079	0.371	0.511	1.45315e-80
KCNMB2	1.97695e-83	-0.455524	0.315	0.448	6.1141e-79
CCDC144A	4.26323e-80	-0.441926	0.246	0.373	1.31849e-75
ST18	1.76099e-78	-0.46202	0.086	0.183	5.44621e-74
USP9Y	6.49439e-75	-0.291285	0.126	0.242	2.00852e-70
DPYD-AS1	7.21879e-74	-0.357514	0.102	0.201	2.23256e-69
NRGN	3.13499e-73	0.396624	0.701	0.64	9.69557e-69
SLC7A14-AS1	5.26992e-72	-0.391964	0.11	0.209	1.62983e-67
CCBE1	1.6999e-70	-0.382493	0.08	0.168	5.25728e-66
UTY	5.17562e-69	-0.270448	0.089	0.185	1.60066e-64
SUMF1	1.22694e-68	-0.335714	0.246	0.366	3.79456e-64
HSPA8	2.08521e-68	0.484526	0.441	0.33	6.44894e-64
QKI	3.14357e-68	-0.370642	0.268	0.391	9.72211e-64
PLCB1	2.16301e-64	0.264731	0.841	0.8	6.68955e-60
DOCK10	2.0538e-63	-0.340639	0.096	0.185	6.35178e-59
AC008696.2	6.60363e-61	0.417467	0.226	0.134	2.0423e-56
ANKRD30BL	2.12495e-60	0.476333	0.445	0.349	6.57182e-56
FAM184B	2.07978e-59	-0.289579	0.066	0.141	6.43213e-55
SNTG1	9.04755e-58	0.325127	0.812	0.797	2.79814e-53
RSRP1	1.73521e-57	-0.352282	0.314	0.423	5.36647e-53
EMC10	2.68085e-56	-0.361652	0.088	0.167	8.29106e-52
CHGA	4.35554e-56	0.42991	0.317	0.223	1.34704e-51
AF165147.1	1.67483e-55	-0.320422	0.08	0.156	5.17974e-51
AL157944.1	8.93084e-55	-0.337534	0.179	0.276	2.76204e-50
AL117329.1	1.77333e-54	0.375971	0.44	0.336	5.48436e-50
MOBP	8.47054e-54	-0.311058	0.072	0.144	2.61968e-49
STXBP6	1.23801e-52	-0.282638	0.143	0.236	3.82878e-48
HNRNPDL	3.58341e-52	-0.294159	0.38	0.485	1.10824e-47
EPHA6	9.16744e-52	-0.328828	0.407	0.519	2.83521e-47
AC025159.1	3.02811e-51	-0.326594	0.216	0.313	9.36504e-47
MGAT4C	4.48743e-51	-0.314546	0.386	0.496	1.38783e-46
SPDYE2	3.46084e-49	-0.268961	0.056	0.119	1.07034e-44
PNISR	4.39683e-49	-0.28744	0.32	0.421	1.35981e-44
AEBP2	1.30457e-48	-0.283398	0.476	0.567	4.03465e-44
CERCAM	2.54588e-48	-0.309763	0.169	0.263	7.87365e-44
AL008633.1	7.65889e-48	-0.286526	0.495	0.588	2.36866e-43
CDH9	1.52609e-47	-0.311768	0.344	0.44	4.71975e-43
SEMA3C	1.98033e-47	-0.273083	0.071	0.137	6.12457e-43
PTGDS	4.58595e-47	-0.378463	0.246	0.346	1.4183e-42
CACNA1E	1.00524e-46	-0.308313	0.468	0.564	3.1089e-42
AC093607.1	3.46098e-46	-0.264675	0.071	0.139	1.07038e-41
AC007563.2	5.31997e-46	-0.29023	0.318	0.416	1.64531e-41
MT2A	6.37459e-46	0.387747	0.14	0.077	1.97147e-41
POU6F2	4.56585e-44	0.325694	0.381	0.286	1.41208e-39
AC024901.1	1.58444e-43	-0.252728	0.166	0.251	4.9002e-39
ADI1	5.49378e-43	-0.265855	0.054	0.11	1.69906e-38
LINC00326	8.62256e-43	0.316741	0.119	0.063	2.6667e-38
PCDH15	2.07483e-42	-0.262237	0.122	0.198	6.41682e-38
PNMA3	2.41945e-42	-0.312057	0.164	0.243	7.48263e-38
PDE8A	5.31083e-42	-0.254253	0.155	0.236	1.64248e-37
FOXP2	8.41326e-42	0.385216	0.283	0.2	2.60197e-37
TMEM144	8.4737e-42	-0.274066	0.064	0.124	2.62066e-37
DDX18	1.44219e-41	-0.250485	0.108	0.179	4.46025e-37
CBLN2	1.6414e-41	-0.315846	0.42	0.507	5.07637e-37
CNP	2.22067e-41	-0.304633	0.119	0.191	6.86785e-37
AC034268.2	3.62457e-41	-0.251045	0.222	0.316	1.12097e-36
PRPF4B	3.80403e-41	-0.284964	0.206	0.292	1.17647e-36
EFNA5	4.79254e-41	0.262093	0.678	0.624	1.48219e-36
SCD	6.25681e-41	-0.309316	0.061	0.117	1.93504e-36
MT-ATP6	1.59947e-40	-0.288008	0.395	0.492	4.94667e-36
CABP1	3.30018e-40	0.275561	0.572	0.499	1.02065e-35
ERBB4	6.05476e-40	-0.276084	0.237	0.33	1.87256e-35
LY86-AS1	3.8525e-39	-0.261293	0.327	0.421	1.19146e-34
GRIK4	1.46888e-38	-0.290074	0.217	0.298	4.54279e-34
SLIT3	3.64977e-38	-0.250335	0.309	0.401	1.12876e-33
BASP1	2.21557e-37	0.266654	0.694	0.661	6.8521e-33
SOX5	1.9216e-36	0.31672	0.569	0.51	5.94294e-32
ZNF365	2.29607e-36	0.390908	0.317	0.245	7.10104e-32
ZNF536	3.48473e-36	-0.251425	0.074	0.132	1.07772e-31
AC016598.2	4.80555e-36	0.31556	0.148	0.089	1.48621e-31
NEFL	1.37831e-35	0.335526	0.378	0.307	4.26271e-31
LINC01122	1.1714e-34	-0.267283	0.382	0.464	3.6228e-30
AC016687.2	6.40443e-34	0.403487	0.114	0.064	1.9807e-29
PDE8B	1.45711e-33	-0.257418	0.302	0.385	4.50641e-29
ZNF385B	1.84962e-33	0.27662	0.575	0.505	5.72031e-29
PHLPP1	3.61948e-32	-0.269487	0.27	0.35	1.1194e-27
FMN1	5.25733e-32	0.256345	0.534	0.459	1.62594e-27
COL5A3	6.97285e-32	0.402694	0.191	0.132	2.15649e-27
NGRN	2.24268e-31	0.320815	0.332	0.266	6.93595e-27
SLC5A4-AS1	7.88292e-31	0.264812	0.291	0.222	2.43795e-26
RORB	8.12961e-29	0.272458	0.351	0.276	2.51424e-24
KCNT1	2.85485e-28	0.321711	0.373	0.309	8.82918e-24
GNAS	3.715e-28	0.28771	0.624	0.616	1.14894e-23
FKBP5	9.12769e-28	0.316045	0.188	0.132	2.82292e-23
PLEC	1.25949e-27	0.312214	0.299	0.235	3.89523e-23
GABPB1-AS1	1.51682e-27	-0.272255	0.186	0.251	4.69107e-23
RNF220	1.80385e-27	-0.272452	0.271	0.342	5.57876e-23
PKD1	8.91899e-27	0.258273	0.549	0.493	2.75837e-22
PKM	3.00025e-26	0.317602	0.487	0.438	9.27888e-22
CALM3	3.1825e-26	0.266879	0.591	0.548	9.84251e-22
FLRT2	3.71989e-26	0.258903	0.658	0.616	1.15045e-21
UBB	1.41189e-25	0.285114	0.405	0.345	4.36656e-21
PRDX2	2.23036e-25	0.29421	0.307	0.245	6.89782e-21
AC004594.1	4.34989e-25	0.388016	0.252	0.196	1.34529e-20
TOX	6.73051e-25	0.25332	0.381	0.313	2.08155e-20
NISCH	1.00729e-24	0.290046	0.515	0.463	3.11524e-20
MAST1	2.1408e-24	0.303893	0.424	0.369	6.62085e-20
KCNH7	5.00405e-24	0.275017	0.607	0.571	1.5476e-19
LMO4	9.4114e-24	0.311175	0.504	0.467	2.91066e-19
PIP4K2A	4.5584e-23	-0.258717	0.183	0.241	1.40978e-18
AC013287.1	7.2524e-23	0.300651	0.477	0.422	2.24295e-18
TPT1	1.31483e-22	0.252406	0.247	0.192	4.06639e-18
PPFIA4	2.2834e-22	0.288286	0.338	0.282	7.06186e-18
COL6A1	3.14246e-22	0.293817	0.217	0.163	9.71868e-18
SLC38A11	6.9865e-22	0.258931	0.143	0.098	2.16072e-17
CYB561	1.03095e-21	0.252644	0.115	0.075	3.18842e-17
FRAS1	1.12737e-21	0.304413	0.301	0.246	3.4866e-17
KIF3C	1.39247e-21	0.269771	0.394	0.342	4.3065e-17
HSPA1A	2.50672e-21	0.289649	0.114	0.075	7.75253e-17
GUK1	3.22139e-21	0.26105	0.318	0.264	9.9628e-17
AL589740.1	1.98359e-20	0.261093	0.206	0.156	6.13466e-16
TOLLIP	4.90073e-20	0.25902	0.262	0.21	1.51565e-15
PFKP	8.8482e-20	0.253958	0.332	0.278	2.73648e-15
PEBP1	1.05873e-19	0.263474	0.533	0.5	3.27432e-15
AC109466.1	6.98776e-19	0.41885	0.223	0.177	2.1611e-14
HINT1	1.64435e-18	0.252683	0.277	0.226	5.08548e-14
CFL1	2.53021e-18	0.267076	0.388	0.343	7.82517e-14
CPLX1	4.16355e-18	0.257048	0.215	0.168	1.28766e-13
ATP6V0C	4.61712e-18	0.25041	0.508	0.474	1.42794e-13
TMSB10	1.57257e-17	0.268185	0.424	0.381	4.86348e-13
IL1RAPL2	7.44889e-17	0.295411	0.245	0.197	2.30372e-12
EEF1A2	4.22524e-16	0.258958	0.341	0.298	1.30674e-11
RPL37A	3.95761e-15	0.333162	0.403	0.37	1.22397e-10
PTOV1	1.32914e-14	0.299784	0.465	0.43	4.11063e-10
AC008415.1	4.22057e-14	0.297219	0.162	0.125	1.3053e-09
PDIA2	3.42242e-10	0.252227	0.212	0.18	1.05845e-05
NEAT1	1.81024e-08	0.273603	0.321	0.294	0.000559852

## Sheet: Ast_AD_logNorm_diffEx 
gene	p_val	avg_log2FC	pct.1	pct.2	p_val_adj
NEAT1	0	1.78814	0.961	0.912	0
PFKP	1.29053e-219	1.3203	0.558	0.2	3.99121e-215
CHI3L1	3.62273e-156	2.35712	0.354	0.097	1.1204e-151
SLC5A3	1.51298e-155	1.30039	0.353	0.092	4.67921e-151
COL5A3	3.51892e-152	0.968128	0.747	0.483	1.0883e-147
SMTN	6.47857e-144	1.18373	0.304	0.063	2.00363e-139
RIMS1	6.44889e-140	1.63875	0.394	0.145	1.99445e-135
MT2A	1.44616e-135	0.920603	0.716	0.458	4.47254e-131
LINC00299	1.11524e-115	0.925996	0.673	0.467	3.44909e-111
GFAP	3.846e-110	0.747661	0.711	0.442	1.18945e-105
MT1G	9.25532e-103	1.16142	0.347	0.133	2.86239e-98
MRPS6	2.52315e-96	0.896588	0.297	0.096	7.80336e-92
SAMD4A	1.69729e-95	0.831956	0.593	0.36	5.24921e-91
SLC38A2	5.75759e-91	0.783703	0.273	0.083	1.78065e-86
CACNB2	2.33083e-88	0.785428	0.742	0.59	7.20854e-84
DTNA	7.82176e-80	0.492782	0.919	0.831	2.41903e-75
CACNA2D3	1.32198e-72	-0.919141	0.219	0.402	4.08847e-68
HAP1	3.67685e-71	0.720321	0.163	0.033	1.13714e-66
SOX5	6.29021e-71	0.600842	0.838	0.792	1.94537e-66
AC091826.2	2.24728e-69	-0.800592	0.115	0.268	6.95017e-65
AC092691.1	9.20862e-69	0.611064	0.812	0.738	2.84795e-64
ARHGAP29	8.61556e-68	0.774007	0.182	0.048	2.66453e-63
NEBL	5.92273e-65	0.546658	0.823	0.732	1.83172e-60
VEGFA	4.16164e-64	0.825159	0.304	0.14	1.28707e-59
RANBP3L	1.37106e-63	0.763932	0.602	0.464	4.24028e-59
SESN1	5.12061e-63	0.675168	0.343	0.17	1.58365e-58
LINC00472	8.85532e-63	0.705944	0.45	0.272	2.73869e-58
HPSE2	1.54276e-62	0.822323	0.609	0.476	4.77131e-58
AC002069.2	1.94124e-62	1.14114	0.261	0.109	6.00366e-58
AL512662.2	5.4696e-61	0.701056	0.238	0.092	1.69158e-56
SLC39A11	7.00175e-60	0.624118	0.624	0.474	2.16543e-55
NAV2	3.36082e-59	0.536507	0.696	0.536	1.0394e-54
VAV3	9.56736e-57	0.72493	0.389	0.221	2.9589e-52
SLC14A1	2.04819e-56	-0.765182	0.227	0.386	6.33445e-52
BCL6	2.15629e-56	0.71203	0.461	0.29	6.66877e-52
TENM2	1.78816e-55	-0.71719	0.433	0.572	5.53025e-51
HGF	3.69849e-55	0.799815	0.265	0.121	1.14383e-50
PRKG1	5.10402e-55	0.517817	0.757	0.635	1.57852e-50
KCNJ10	5.06865e-53	0.624861	0.315	0.158	1.56758e-48
SYNM	8.80663e-53	0.572567	0.162	0.048	2.72363e-48
LINC00511	1.04999e-52	0.653877	0.488	0.314	3.24731e-48
CDH23	1.92546e-52	0.617343	0.172	0.055	5.95487e-48
NUDT4	1.02172e-51	0.582963	0.176	0.058	3.15987e-47
NPAS2	1.45635e-51	0.641023	0.349	0.191	4.50405e-47
ARL17B	2.50452e-51	-0.501488	0.042	0.14	7.74573e-47
ABHD2	3.19436e-51	0.72726	0.341	0.189	9.87921e-47
EGLN3	6.31965e-49	0.783989	0.299	0.159	1.95448e-44
KCNE4	1.44252e-47	0.566367	0.126	0.031	4.46129e-43
MAML2	5.21283e-47	0.564745	0.671	0.546	1.61217e-42
MAPK4	7.50472e-47	0.592926	0.45	0.289	2.32098e-42
IL17RB	7.76578e-47	0.546041	0.232	0.102	2.40172e-42
PNPLA6	1.52087e-46	0.490531	0.175	0.062	4.7036e-42
COL27A1	1.66086e-46	0.559253	0.182	0.068	5.13655e-42
RASSF8	1.70613e-46	0.639709	0.426	0.275	5.27654e-42
LSAMP	2.54939e-46	0.327979	0.976	0.976	7.8845e-42
TPD52L1	6.3045e-46	0.526	0.618	0.471	1.94979e-41
NCAN	6.68335e-46	0.591094	0.442	0.283	2.06696e-41
PDE4DIP	3.85757e-45	0.478766	0.48	0.317	1.19303e-40
LPP	1.3081e-44	0.540553	0.648	0.509	4.04555e-40
SLC7A2	5.4223e-44	0.630724	0.343	0.203	1.67695e-39
GLIS3	5.88165e-43	0.542132	0.731	0.617	1.81902e-38
PDE3B	1.38077e-42	0.647973	0.337	0.197	4.27032e-38
KNOP1	1.62172e-42	0.614961	0.292	0.157	5.01548e-38
XIST	1.84995e-42	-0.590573	0.296	0.444	5.72135e-38
PTGDS	6.89905e-42	-0.649657	0.754	0.761	2.13367e-37
MT-ND3	1.71158e-41	0.626471	0.307	0.171	5.2934e-37
ITPKB	2.53074e-41	0.453706	0.575	0.415	7.82683e-37
CAPN2	3.29983e-41	0.437889	0.336	0.189	1.02054e-36
PLOD2	3.8714e-41	0.727316	0.353	0.217	1.19731e-36
FNDC3B	8.48521e-41	0.615177	0.356	0.22	2.62422e-36
GAREM1	9.01051e-41	0.529584	0.432	0.284	2.78668e-36
CST3	1.68161e-40	-1.45817	0.439	0.509	5.20073e-36
CTNNA2	2.33501e-40	-0.370952	0.927	0.952	7.2215e-36
AHNAK	4.22608e-40	0.562257	0.275	0.146	1.307e-35
SSBP2	4.93358e-39	0.563403	0.551	0.418	1.52581e-34
AGBL4	1.72356e-38	-0.552073	0.174	0.298	5.33045e-34
RASGEF1B	2.08157e-38	0.949617	0.117	0.035	6.43766e-34
MT1F	3.3109e-38	0.617658	0.187	0.083	1.02396e-33
DKK3	3.38694e-38	0.446759	0.376	0.234	1.04748e-33
ZNF98	3.57096e-38	0.401601	0.446	0.287	1.10439e-33
MKLN1	1.12666e-37	0.402926	0.711	0.585	3.48442e-33
AC002429.2	1.07927e-36	-0.547387	0.354	0.483	3.33786e-32
SASH1	1.2286e-36	0.529194	0.638	0.542	3.79968e-32
ADAM12	1.26749e-36	0.549023	0.178	0.077	3.91997e-32
AHCYL2	1.79161e-36	0.392774	0.709	0.593	5.5409e-32
B4GALNT4	2.11168e-36	0.486735	0.3	0.172	6.53078e-32
AC053513.1	3.0401e-36	-0.62282	0.186	0.303	9.4021e-32
WFS1	3.69345e-36	0.471131	0.238	0.122	1.14227e-31
KCNIP4	4.5018e-36	-0.639791	0.24	0.369	1.39227e-31
SLC35F1	6.69357e-36	0.474381	0.52	0.378	2.07012e-31
LINC02340	9.72315e-36	-0.490042	0.055	0.139	3.00708e-31
SPARCL1	1.60678e-35	-0.750515	0.672	0.693	4.96929e-31
UTY	3.43312e-35	0.402782	0.206	0.095	1.06176e-30
RNF24	5.26674e-35	0.496152	0.279	0.158	1.62884e-30
AC079352.1	7.9956e-35	-0.627874	0.073	0.163	2.4728e-30
MAF	9.26535e-35	0.425185	0.178	0.078	2.86549e-30
ARMH1	2.18434e-34	-0.515066	0.078	0.169	6.75549e-30
NRXN1	2.80798e-34	-0.319811	0.875	0.899	8.68424e-30
PTPN13	3.04963e-34	0.494273	0.389	0.255	9.43158e-30
ZNF804B	4.44799e-34	0.677971	0.165	0.07	1.37563e-29
AC003991.1	7.19931e-34	0.526628	0.143	0.055	2.22653e-29
HMBOX1	7.34354e-34	0.457224	0.382	0.249	2.27114e-29
SLC30A1	8.12855e-34	0.469508	0.12	0.041	2.51392e-29
XAF1	9.41491e-34	0.497683	0.144	0.057	2.91175e-29
ZMAT3	1.53669e-33	0.485998	0.238	0.127	4.75251e-29
FAM107A	2.298e-33	0.485774	0.451	0.315	7.10702e-29
ROCK2	2.90172e-33	0.490742	0.299	0.176	8.97414e-29
PLPP1	5.12329e-33	0.632292	0.416	0.296	1.58448e-28
AC125613.1	5.17145e-33	-0.49337	0.077	0.166	1.59937e-28
AEBP1	2.37009e-32	0.407968	0.237	0.125	7.32998e-28
SLC25A29	2.50916e-32	0.412823	0.337	0.205	7.76009e-28
AL078604.4	2.71421e-32	0.575542	0.21	0.108	8.39424e-28
STARD13	2.76343e-32	0.469269	0.43	0.299	8.54645e-28
LRRC7	1.19271e-31	-0.563504	0.13	0.233	3.6887e-27
FBXO2	3.16892e-31	0.437964	0.163	0.072	9.80052e-27
CACNA1D	3.71834e-31	0.487923	0.13	0.049	1.14997e-26
NCAM2	5.57633e-31	0.358537	0.737	0.632	1.72459e-26
MIR100HG	5.87189e-31	0.408891	0.524	0.39	1.816e-26
PLXNB1	7.68948e-31	0.373649	0.402	0.266	2.37812e-26
ETNPPL	9.05515e-31	-0.624264	0.24	0.345	2.80049e-26
AC138627.1	1.87581e-30	-0.589452	0.12	0.215	5.80131e-26
LCOR	5.47854e-30	0.385417	0.333	0.209	1.69435e-25
GSN	5.85947e-30	0.452185	0.3	0.183	1.81216e-25
NKAIN3	8.37966e-30	-0.422864	0.63	0.695	2.59158e-25
PTPN9	1.13308e-29	0.507972	0.339	0.221	3.50428e-25
MRAS	1.31248e-29	0.397255	0.329	0.207	4.0591e-25
JAM2	1.51073e-29	0.462192	0.193	0.098	4.67225e-25
CSRP1	3.16596e-29	0.438205	0.339	0.22	9.79137e-25
ACSBG1	3.81152e-29	0.414501	0.436	0.307	1.17879e-24
C1orf61	4.84024e-29	-0.503834	0.477	0.555	1.49694e-24
DDIT4	4.98231e-29	0.44548	0.212	0.114	1.54088e-24
RBFOX1	5.95261e-29	-0.537188	0.274	0.385	1.84096e-24
NFIB	6.83596e-29	0.368358	0.668	0.564	2.11416e-24
CTSD	1.67676e-28	0.36056	0.267	0.157	5.18572e-24
CDH2	1.8829e-28	0.388891	0.437	0.312	5.82325e-24
PFKFB3	2.26149e-28	0.431072	0.342	0.225	6.9941e-24
NWD1	2.27967e-28	0.413295	0.258	0.149	7.05034e-24
DDR2	2.58411e-28	0.463295	0.17	0.083	7.99186e-24
SLC25A18	6.8968e-28	0.366502	0.477	0.346	2.13297e-23
SPRED1	8.16914e-28	0.415276	0.339	0.221	2.52647e-23
MGLL	9.34628e-28	0.390534	0.426	0.299	2.89052e-23
ARHGEF10L	1.12943e-27	0.411537	0.256	0.149	3.493e-23
DDX5	1.53738e-27	0.378967	0.611	0.485	4.75465e-23
LRP1B	2.34298e-27	0.280758	0.911	0.87	7.24614e-23
ANKDD1A	2.38744e-27	-0.540077	0.288	0.392	7.38364e-23
LPIN2	3.99504e-27	0.465493	0.223	0.127	1.23555e-22
SEC61A1	5.29546e-27	0.404068	0.136	0.059	1.63773e-22
DOCK7	5.63358e-27	0.376537	0.585	0.462	1.7423e-22
MIAT	2.60913e-26	-0.473154	0.103	0.189	8.06926e-22
INPP4B	2.91647e-26	0.533778	0.334	0.229	9.01977e-22
FSTL5	4.06699e-26	0.436098	0.124	0.051	1.2578e-21
MAPK10	5.06257e-26	0.315275	0.767	0.707	1.5657e-21
SRGAP1	5.75683e-26	0.470588	0.38	0.266	1.78041e-21
COL23A1	6.56804e-26	0.503213	0.14	0.064	2.0313e-21
PTAR1	7.78145e-26	0.342758	0.283	0.176	2.40657e-21
TTC28	8.42161e-26	0.37165	0.558	0.437	2.60455e-21
MSRA	9.53453e-26	0.334368	0.354	0.235	2.94874e-21
MT-ND1	1.79025e-25	0.406015	0.254	0.152	5.53672e-21
AK4	2.19481e-25	0.387941	0.22	0.126	6.7879e-21
CLIP2	2.29693e-25	0.385726	0.205	0.113	7.10372e-21
LINC00513	2.48718e-25	0.457338	0.417	0.301	7.69212e-21
THRB	2.61722e-25	0.350089	0.328	0.213	8.09427e-21
UPP2	4.65255e-25	-0.437822	0.061	0.13	1.43889e-20
DPP10	6.59153e-25	-0.434724	0.489	0.599	2.03856e-20
TTTY14	7.95688e-25	0.342171	0.176	0.089	2.46082e-20
IRS2	2.07956e-24	0.428782	0.277	0.177	6.43145e-20
TMEM184B	2.4359e-24	0.298797	0.252	0.149	7.53351e-20
AC025159.1	5.9277e-24	-0.542438	0.081	0.154	1.83326e-19
CTDSPL	7.36049e-24	0.357937	0.381	0.269	2.27638e-19
BICD1	7.83363e-24	0.391268	0.423	0.305	2.42271e-19
STOM	9.93015e-24	0.426035	0.205	0.118	3.0711e-19
CD44	1.44696e-23	0.543253	0.237	0.145	4.47503e-19
AL365295.1	1.47998e-23	0.386936	0.195	0.107	4.57712e-19
PRRX1	1.89661e-23	0.468507	0.284	0.185	5.86565e-19
GRIK2	1.96196e-23	-0.450616	0.078	0.15	6.06774e-19
ADCY8	2.27605e-23	0.396061	0.262	0.164	7.03913e-19
AL390783.1	2.77415e-23	0.3722	0.225	0.133	8.57962e-19
FZD3	3.10513e-23	0.306068	0.248	0.15	9.60324e-19
PLK5	4.04672e-23	0.308546	0.121	0.052	1.25153e-18
MIR99AHG	4.13994e-23	0.251052	0.847	0.8	1.28036e-18
VPS13C	4.94014e-23	0.311351	0.422	0.306	1.52784e-18
FAM168A	5.38116e-23	0.336256	0.426	0.308	1.66423e-18
PDZRN3	5.42471e-23	0.394483	0.435	0.32	1.6777e-18
MT-ND2	5.43654e-23	0.395884	0.221	0.13	1.68136e-18
AC104389.5	5.94957e-23	0.301435	0.102	0.04	1.84002e-18
MROH7	6.4411e-23	-0.530442	0.217	0.307	1.99204e-18
MT1E	6.95506e-23	0.312663	0.379	0.268	2.15099e-18
RFFL	6.99117e-23	0.316583	0.18	0.097	2.16216e-18
PTPRZ1	7.72073e-23	0.307783	0.731	0.63	2.38779e-18
LAMA5	7.9434e-23	0.323731	0.128	0.059	2.45666e-18
HP1BP3	9.25151e-23	0.327034	0.352	0.243	2.86122e-18
SLC25A48	1.43733e-22	0.303986	0.194	0.108	4.44523e-18
RERG	2.43619e-22	0.488555	0.229	0.142	7.53439e-18
KAT2A	2.44269e-22	0.252597	0.233	0.137	7.55452e-18
SIPA1L1	2.89696e-22	0.315744	0.521	0.409	8.95943e-18
NLGN4Y	3.79312e-22	0.308372	0.123	0.055	1.1731e-17
SGO1-AS1	3.89437e-22	-0.544013	0.088	0.159	1.20441e-17
AC114971.1	4.15751e-22	-0.475809	0.292	0.383	1.28579e-17
PURG	4.27809e-22	0.323376	0.229	0.139	1.32308e-17
BMPR1A	4.34032e-22	0.338328	0.449	0.338	1.34233e-17
AC009163.1	4.71386e-22	0.458283	0.137	0.068	1.45786e-17
DTX3	6.89932e-22	0.322718	0.137	0.066	2.13375e-17
LINC01748	8.33624e-22	-0.431754	0.208	0.3	2.57815e-17
SERGEF	9.24767e-22	0.265555	0.192	0.108	2.86003e-17
SLC20A2	1.05973e-21	0.420346	0.307	0.207	3.27742e-17
MT-ATP6	2.23123e-21	0.348232	0.3	0.198	6.90052e-17
NRP1	2.23382e-21	-0.3615	0.104	0.18	6.90854e-17
ZEB1	2.37039e-21	0.295703	0.37	0.259	7.33091e-17
PCDH9-AS2	2.54935e-21	-0.510431	0.41	0.479	7.88439e-17
LINC01572	2.58904e-21	-0.483033	0.075	0.142	8.00713e-17
FGFR3	2.70655e-21	-0.500841	0.319	0.405	8.37053e-17
ANKRD17	3.11415e-21	0.295791	0.45	0.335	9.63113e-17
SLC39A12	3.12111e-21	0.419384	0.341	0.244	9.65265e-17
CLCN7	3.91506e-21	0.274852	0.134	0.065	1.21081e-16
ATG4B	4.05047e-21	0.27683	0.208	0.121	1.25269e-16
PTPRJ	4.11946e-21	0.32909	0.272	0.176	1.27402e-16
MARCH6	4.9038e-21	0.321812	0.379	0.273	1.5166e-16
AC104596.1	6.70604e-21	-0.42227	0.157	0.24	2.07398e-16
MT1M	1.20805e-20	0.309702	0.268	0.175	3.73613e-16
SNRNP70	1.31213e-20	0.304689	0.419	0.303	4.05802e-16
FEM1C	1.32563e-20	0.277777	0.131	0.065	4.09978e-16
CHST11	1.3752e-20	0.271803	0.376	0.264	4.25307e-16
ARHGAP24	1.75071e-20	-0.517026	0.361	0.432	5.41443e-16
MRTFA	2.17628e-20	0.318635	0.277	0.183	6.73058e-16
CHD9	2.47123e-20	0.308566	0.545	0.435	7.64276e-16
ADGRL3	2.76217e-20	0.281034	0.749	0.679	8.54257e-16
RFX3	3.05172e-20	0.304358	0.557	0.448	9.43805e-16
NFKBIA	3.31212e-20	0.267555	0.103	0.045	1.02434e-15
LINC00461	4.87693e-20	-0.476843	0.354	0.427	1.50829e-15
NRXN3	6.76373e-20	-0.412154	0.215	0.305	2.09182e-15
STAT3	7.94764e-20	0.387041	0.26	0.172	2.45797e-15
PTMS	8.71444e-20	0.367308	0.101	0.044	2.69512e-15
MGAT4C	9.01799e-20	-0.436449	0.409	0.484	2.78899e-15
RHOJ	9.4987e-20	0.399293	0.278	0.189	2.93766e-15
EFEMP1	1.02139e-19	-0.388481	0.203	0.29	3.15884e-15
AC016831.7	1.11789e-19	0.315255	0.215	0.132	3.45731e-15
METTL7A	1.1257e-19	0.420797	0.3	0.21	3.48145e-15
APOE	1.25806e-19	-0.951562	0.379	0.434	3.89079e-15
ERBIN	1.29229e-19	0.278615	0.609	0.488	3.99668e-15
LRMDA	1.63464e-19	0.452262	0.204	0.125	5.05544e-15
CSF1	1.73414e-19	0.369857	0.11	0.051	5.36319e-15
FYN	1.74611e-19	0.298477	0.618	0.512	5.40021e-15
BMP2K	2.02602e-19	0.297004	0.401	0.294	6.26588e-15
CHDH	2.2592e-19	0.257901	0.143	0.075	6.98702e-15
FXYD1	2.37507e-19	-0.463294	0.142	0.219	7.34538e-15
KCNMB2-AS1	2.60152e-19	0.334361	0.402	0.297	8.04573e-15
SUN2	2.65235e-19	0.365843	0.244	0.157	8.20292e-15
ADIRF	3.03907e-19	0.299344	0.127	0.064	9.39892e-15
NMT1	3.16091e-19	0.375836	0.282	0.191	9.77574e-15
ACSL6	3.44495e-19	-0.437366	0.237	0.32	1.06542e-14
PRKD1	3.97933e-19	0.338775	0.45	0.349	1.23069e-14
ALDH1A1	4.85537e-19	-0.446105	0.122	0.195	1.50162e-14
HSPB1	5.54322e-19	0.542571	0.285	0.2	1.71435e-14
GLUD1	5.69225e-19	-0.445137	0.312	0.391	1.76044e-14
TMTC1	7.73579e-19	0.321426	0.226	0.144	2.39245e-14
UFL1-AS1	8.18636e-19	-0.412678	0.085	0.15	2.5318e-14
ACADVL	1.14652e-18	0.318111	0.227	0.145	3.54585e-14
PCSK5	1.34498e-18	0.314149	0.386	0.284	4.15962e-14
MEG3	1.8066e-18	-0.367083	0.249	0.344	5.58726e-14
ZFAND3	2.08357e-18	0.285974	0.523	0.413	6.44386e-14
PHF21A	2.25262e-18	0.299467	0.405	0.3	6.96668e-14
DGKD	2.64069e-18	0.31116	0.143	0.077	8.16687e-14
C4orf19	3.0364e-18	0.337416	0.161	0.092	9.39069e-14
IGFBP5	3.43351e-18	0.306495	0.108	0.051	1.06188e-13
S100B	3.60201e-18	-0.382072	0.155	0.233	1.11399e-13
ADORA1	3.92496e-18	0.253558	0.103	0.047	1.21387e-13
AC107021.1	3.96004e-18	0.383614	0.175	0.103	1.22472e-13
TMEM132A	3.99076e-18	0.29527	0.204	0.126	1.23422e-13
FGFR1	4.49481e-18	0.279913	0.226	0.145	1.39011e-13
GAREM2	4.50581e-18	0.292413	0.109	0.052	1.39351e-13
MEGF9	5.88944e-18	0.326898	0.351	0.257	1.82143e-13
IFRD1	7.38833e-18	0.320683	0.18	0.107	2.28499e-13
MTUS1	8.63546e-18	0.30209	0.36	0.263	2.67069e-13
FANK1	1.03795e-17	0.332945	0.116	0.059	3.21006e-13
IGFBP7	1.07294e-17	0.25177	0.334	0.238	3.31827e-13
ELF1	1.2292e-17	0.270789	0.17	0.099	3.80156e-13
LRP8	1.41467e-17	0.31208	0.128	0.068	4.37515e-13
PRCP	2.25079e-17	0.258729	0.231	0.149	6.96101e-13
SEPTIN8	2.39077e-17	0.299903	0.193	0.118	7.39394e-13
BRINP1	2.81041e-17	0.370857	0.314	0.227	8.69174e-13
SPECC1	3.41207e-17	0.291796	0.304	0.213	1.05525e-12
PLXNB2	4.19339e-17	0.312956	0.147	0.083	1.29689e-12
RB1	4.29793e-17	0.262008	0.24	0.157	1.32922e-12
CHD2	4.70467e-17	0.26231	0.433	0.33	1.45501e-12
LRRC8A	4.76364e-17	0.28347	0.189	0.117	1.47325e-12
P4HA1	4.79749e-17	0.283103	0.293	0.204	1.48372e-12
TEX9	5.48599e-17	-0.342552	0.053	0.104	1.69665e-12
OBI1-AS1	5.67823e-17	-0.331683	0.561	0.619	1.75611e-12
SDC3	6.2334e-17	0.261401	0.131	0.071	1.9278e-12
C8orf37-AS1	6.3988e-17	-0.387846	0.055	0.107	1.97896e-12
AC068587.4	6.62657e-17	-0.49275	0.181	0.254	2.0494e-12
RFX2	6.70418e-17	0.268952	0.289	0.2	2.0734e-12
PLEKHA5	9.30211e-17	0.408242	0.371	0.281	2.87686e-12
ZNF518A	1.00498e-16	-0.386095	0.223	0.299	3.1081e-12
CSPP1	1.07012e-16	0.251536	0.225	0.147	3.30956e-12
TMBIM6	1.13084e-16	0.281888	0.294	0.206	3.49734e-12
DLGAP2	1.33557e-16	-0.449038	0.066	0.121	4.1305e-12
ATP2B4	1.46595e-16	0.303861	0.34	0.247	4.53374e-12
GRIA2	1.56022e-16	-0.478614	0.331	0.399	4.8253e-12
PDE5A	1.83163e-16	-0.532299	0.238	0.309	5.6647e-12
PAN2	1.93519e-16	0.307391	0.112	0.057	5.98497e-12
COLGALT2	2.15616e-16	0.291973	0.162	0.096	6.66837e-12
CTNNA3	2.30907e-16	-0.512216	0.126	0.193	7.14125e-12
ARNTL	2.43202e-16	0.256808	0.157	0.091	7.52149e-12
CNTNAP3B	2.74009e-16	0.308493	0.245	0.165	8.47429e-12
MT-CO2	2.79683e-16	0.305244	0.319	0.23	8.64976e-12
NPTN	2.80256e-16	0.279526	0.2	0.128	8.66748e-12
AC098829.1	2.80652e-16	-0.40539	0.166	0.239	8.67972e-12
JARID2	2.81121e-16	0.30511	0.454	0.358	8.69422e-12
SREK1	3.52184e-16	0.281493	0.183	0.114	1.0892e-11
SLC7A11	4.04479e-16	0.269804	0.494	0.396	1.25093e-11
LINC00609	4.63709e-16	-0.533512	0.171	0.247	1.43411e-11
TAPBP	4.95211e-16	0.263671	0.172	0.104	1.53154e-11
AC106845.1	5.05753e-16	0.284066	0.306	0.22	1.56414e-11
CD38	5.11938e-16	-0.356229	0.078	0.134	1.58327e-11
EHBP1	5.5138e-16	0.414713	0.397	0.313	1.70525e-11
ZFYVE28	5.80013e-16	0.392298	0.228	0.154	1.79381e-11
CCSER1	6.07747e-16	-0.370839	0.072	0.128	1.87958e-11
SOX2-OT	6.73191e-16	-0.36449	0.23	0.307	2.08198e-11
GBE1	6.93371e-16	0.287291	0.112	0.058	2.14439e-11
SCRG1	7.12345e-16	-0.490334	0.112	0.173	2.20307e-11
PTPRD	7.14545e-16	-0.387697	0.273	0.353	2.20987e-11
NAT8L	7.84674e-16	0.313513	0.285	0.202	2.42676e-11
CDK2AP1	8.30953e-16	0.250728	0.103	0.051	2.56989e-11
AUP1	9.35308e-16	0.302875	0.137	0.077	2.89263e-11
AGFG2	1.02853e-15	0.290406	0.131	0.073	3.18095e-11
CPEB4	1.06894e-15	0.292885	0.522	0.428	3.30592e-11
KCTD8	1.08124e-15	0.290291	0.262	0.181	3.34395e-11
CSGALNACT1	1.23428e-15	-0.385269	0.478	0.524	3.81724e-11
ACSS1	1.26054e-15	-0.385165	0.253	0.331	3.89846e-11
FAM135B	1.29426e-15	0.298932	0.187	0.118	4.00277e-11
UGP2	1.29751e-15	-0.451176	0.172	0.24	4.01282e-11
PLEC	1.59463e-15	0.32078	0.267	0.187	4.93173e-11
PLXND1	1.70678e-15	0.27991	0.102	0.051	5.27855e-11
AGT	2.01287e-15	-0.523271	0.176	0.244	6.22519e-11
C2orf72	2.54267e-15	0.297405	0.249	0.172	7.8637e-11
EAF2	2.69876e-15	0.280029	0.154	0.092	8.34645e-11
POR	2.74599e-15	0.264734	0.18	0.112	8.49253e-11
NPL	3.28766e-15	-0.412421	0.214	0.284	1.01678e-10
WWTR1	3.38242e-15	0.575427	0.208	0.141	1.04608e-10
AZIN1-AS1	3.75442e-15	-0.411568	0.107	0.168	1.16113e-10
ARAP2	3.79782e-15	0.281214	0.508	0.42	1.17455e-10
ALDH7A1	4.47661e-15	-0.40799	0.173	0.242	1.38448e-10
MEF2C-AS1	4.47668e-15	-0.435645	0.341	0.407	1.3845e-10
PDE4B	4.85497e-15	0.343741	0.594	0.512	1.5015e-10
OPHN1	5.72555e-15	0.299229	0.591	0.504	1.77074e-10
STXBP5L	6.05887e-15	-0.460082	0.107	0.167	1.87383e-10
DDR1	6.49006e-15	0.289311	0.213	0.142	2.00718e-10
LINC01094	7.04153e-15	0.375238	0.11	0.058	2.17774e-10
MPDZ	7.04157e-15	0.263453	0.28	0.2	2.17775e-10
DGKZ	9.53712e-15	0.251532	0.187	0.119	2.94955e-10
PTMA	9.69737e-15	0.265116	0.26	0.18	2.99911e-10
AC015983.2	9.92817e-15	-0.260666	0.054	0.102	3.07049e-10
NACC2	1.0211e-14	0.292953	0.258	0.182	3.15795e-10
MXI1	1.06076e-14	0.269781	0.319	0.236	3.28062e-10
MICALL2	1.18539e-14	0.257009	0.303	0.219	3.66607e-10
CYB5B	1.31872e-14	0.302009	0.193	0.126	4.0784e-10
NEGR1	1.60687e-14	-0.274435	0.177	0.251	4.96957e-10
ZMAT1	1.67812e-14	-0.363866	0.145	0.209	5.18993e-10
OPCML	1.80297e-14	-0.490696	0.123	0.186	5.57605e-10
AL109809.5	1.98862e-14	-0.438193	0.358	0.422	6.15021e-10
MFGE8	2.19619e-14	0.316722	0.225	0.152	6.79217e-10
CSMD1	2.46585e-14	-0.426727	0.181	0.251	7.62615e-10
ADHFE1	2.58105e-14	-0.373657	0.106	0.164	7.9824e-10
INPPL1	2.58486e-14	0.26345	0.143	0.085	7.99418e-10
AC087854.1	3.43864e-14	-0.420252	0.218	0.285	1.06347e-09
COL6A1	3.47549e-14	0.252494	0.142	0.084	1.07486e-09
SCG3	3.5589e-14	-0.533142	0.15	0.212	1.10066e-09
MT-ND4	4.07627e-14	0.257391	0.259	0.18	1.26067e-09
ITPR2	4.35234e-14	0.264219	0.595	0.516	1.34605e-09
ACER3	6.24898e-14	0.256582	0.194	0.128	1.93262e-09
TGFB2	6.30691e-14	0.272449	0.285	0.208	1.95054e-09
SCARA3	1.54058e-13	0.32599	0.176	0.115	4.76456e-09
IL1RAPL1	1.91255e-13	-0.425921	0.182	0.249	5.91495e-09
PRKCA	1.9506e-13	0.260846	0.746	0.657	6.03261e-09
HEPACAM	1.97722e-13	0.269665	0.394	0.311	6.11495e-09
SCD5	2.25772e-13	0.263196	0.488	0.398	6.98246e-09
ITGB1	3.29641e-13	0.314349	0.154	0.098	1.01948e-08
ENAH	3.65028e-13	0.258013	0.266	0.192	1.12892e-08
PLRG1	7.84853e-13	-0.275122	0.064	0.109	2.42732e-08
FDFT1	8.4757e-13	0.265292	0.151	0.095	2.62128e-08
CFAP47	1.31264e-12	0.293531	0.102	0.056	4.05962e-08
GRID2	1.49978e-12	-0.336483	0.082	0.133	4.63837e-08
GNA14	1.82686e-12	0.34362	0.38	0.301	5.64994e-08
DEAF1	2.55799e-12	0.265475	0.152	0.097	7.91111e-08
CRB1	2.60703e-12	-0.340408	0.382	0.437	8.06276e-08
AC002460.2	2.63743e-12	-0.362837	0.235	0.298	8.15677e-08
ITGB8	2.85588e-12	0.251013	0.299	0.223	8.83237e-08
MAN1C1	3.25778e-12	0.428732	0.16	0.105	1.00753e-07
C2CD2	3.63718e-12	0.281647	0.122	0.073	1.12487e-07
AC073475.1	3.70633e-12	-0.40167	0.237	0.296	1.14626e-07
AC099792.1	4.19651e-12	-0.262494	0.171	0.236	1.29785e-07
GRIN2C	7.72413e-12	0.420466	0.266	0.204	2.38884e-07
AL589740.1	8.58618e-12	-0.324065	0.57	0.597	2.65545e-07
HSPA1A	8.84914e-12	0.267536	0.21	0.147	2.73677e-07
RFX3-AS1	1.00914e-11	-0.380807	0.198	0.255	3.12097e-07
NRCAM	1.11819e-11	0.289683	0.648	0.572	3.45821e-07
AC124852.1	2.10259e-11	-0.291137	0.078	0.124	6.50267e-07
LINC01376	2.10802e-11	-0.286084	0.084	0.131	6.51946e-07
PTOV1	2.48147e-11	0.287138	0.253	0.183	7.67443e-07
ACTN1	4.62251e-11	0.262878	0.129	0.081	1.4296e-06
CIRBP	5.8007e-11	-0.257786	0.153	0.211	1.79398e-06
ARHGEF3	5.99736e-11	0.393477	0.209	0.154	1.8548e-06
FARP1	6.21134e-11	-0.298702	0.355	0.409	1.92098e-06
PLPP3	7.90768e-11	0.254383	0.491	0.415	2.44561e-06
SOD2	8.04116e-11	0.295895	0.214	0.155	2.48689e-06
CLIC4	1.1414e-10	0.315104	0.182	0.128	3.52999e-06
TUBA1A	1.25983e-10	-0.404941	0.107	0.154	3.89627e-06
BCR	1.28202e-10	0.250565	0.175	0.12	3.96489e-06
FTH1	1.2842e-10	-0.620571	0.549	0.554	3.97165e-06
BAG3	1.48597e-10	0.333379	0.135	0.088	4.59565e-06
GNA14-AS1	1.90306e-10	0.301779	0.27	0.205	5.8856e-06
RPL24	2.05481e-10	-0.314738	0.1	0.146	6.35492e-06
CA8	2.269e-10	-0.318175	0.148	0.202	7.01733e-06
ANO6	3.15051e-10	0.257859	0.187	0.132	9.74358e-06
KCND2	3.28658e-10	-0.304893	0.109	0.158	1.01644e-05
GNPTAB	3.33635e-10	-0.373894	0.127	0.176	1.03183e-05
AC068308.1	3.45021e-10	-0.326783	0.076	0.118	1.06705e-05
PBX1	3.75268e-10	-0.321262	0.412	0.454	1.16059e-05
CC2D2A	3.95687e-10	-0.383791	0.115	0.162	1.22374e-05
STON2	4.06431e-10	-0.361458	0.363	0.408	1.25697e-05
CABLES1	4.91812e-10	-0.301733	0.299	0.355	1.52103e-05
ATL2	5.99527e-10	-0.421692	0.139	0.186	1.85416e-05
RBMX	6.35232e-10	-0.33676	0.338	0.386	1.96458e-05
CD47	6.55314e-10	-0.316716	0.141	0.191	2.02669e-05
CNTNAP2	7.22915e-10	-0.262686	0.217	0.277	2.23576e-05
TUBB2B	8.05749e-10	-0.564966	0.119	0.163	2.49194e-05
ORC3	8.51146e-10	-0.26537	0.069	0.109	2.63234e-05
CTSH	8.61347e-10	-0.296584	0.107	0.154	2.66389e-05
AL513166.1	9.03651e-10	-0.330293	0.074	0.115	2.79472e-05
SFMBT2	1.08741e-09	0.258903	0.383	0.311	3.36304e-05
RPL41	1.34013e-09	-0.394706	0.243	0.296	4.14461e-05
H3F3B	1.86449e-09	-0.529755	0.127	0.171	5.7663e-05
UNC80	1.99651e-09	-0.262517	0.064	0.102	6.17462e-05
ARHGAP31	2.57903e-09	0.258261	0.24	0.183	7.97616e-05
DPYSL2	2.59717e-09	-0.366506	0.591	0.577	8.03227e-05
SHISA6	3.56859e-09	-0.279827	0.075	0.115	0.000110366
CACNA1A	3.71937e-09	-0.364291	0.079	0.119	0.000115029
ATP6AP1L	4.41112e-09	-0.409017	0.108	0.149	0.000136423
SEC62	6.5341e-09	-0.289726	0.154	0.202	0.00020208
DPH6	7.95267e-09	-0.321163	0.175	0.223	0.000245952
ELL2	8.40848e-09	0.386784	0.158	0.114	0.000260049
RPS27A	1.0421e-08	-0.263655	0.1	0.142	0.000322291
GPC6	1.08053e-08	0.512511	0.174	0.13	0.000334174
FTL	1.16216e-08	-0.458727	0.432	0.456	0.000359421
MTERF1	1.274e-08	-0.390534	0.116	0.158	0.000394011
N4BP2L1	1.28661e-08	-0.305178	0.069	0.105	0.000397911
GJB6	1.37134e-08	-0.28715	0.067	0.104	0.000424114
CHCHD2	1.43445e-08	-0.323912	0.074	0.11	0.000443631
RPS13	1.46054e-08	-0.286929	0.093	0.134	0.000451701
ALDH1L1	1.57867e-08	0.250872	0.368	0.305	0.000488234
PCDH9-AS4	1.70692e-08	-0.329737	0.084	0.122	0.0005279
AC087564.1	1.74824e-08	-0.27536	0.208	0.259	0.000540678
SHISA5	1.87165e-08	0.259833	0.127	0.087	0.000578844
AC021231.1	2.10194e-08	-0.258222	0.079	0.117	0.000650068
CASC2	2.93755e-08	-0.254728	0.096	0.136	0.000908498
IQCA1	3.60615e-08	-0.268456	0.228	0.279	0.00111527
MMD2	3.79257e-08	-0.361935	0.188	0.234	0.00117293
PER3	4.38748e-08	-0.35642	0.196	0.242	0.00135692
LRRC37A3	5.34362e-08	-0.297873	0.093	0.132	0.00165262
MBP	5.82044e-08	-0.380026	0.142	0.186	0.00180009
AC115622.1	6.00893e-08	-0.315203	0.089	0.126	0.00185838
PPP1R9A	6.18883e-08	-0.309667	0.513	0.525	0.00191402
KCTD16	6.54737e-08	-0.345309	0.074	0.108	0.00202491
RPL23A	1.07178e-07	-0.286939	0.152	0.195	0.00331469
HILPDA	1.07238e-07	0.317028	0.144	0.104	0.00331655
FAM20C	1.20276e-07	0.262814	0.118	0.081	0.00371978
AC009041.2	1.28381e-07	-0.320438	0.275	0.322	0.00397044
GRM7	1.30913e-07	-0.30576	0.104	0.143	0.00404874
MTMR1	1.55294e-07	-0.284836	0.108	0.146	0.00480278
C11orf58	1.74556e-07	-0.251298	0.11	0.149	0.0053985
PDE3A	1.90648e-07	-0.267336	0.119	0.16	0.00589617
C21orf62-AS1	1.93918e-07	-0.317705	0.102	0.139	0.0059973
ACOT11	2.00641e-07	-0.304903	0.292	0.338	0.00620522
EPHA6	2.30543e-07	-0.301443	0.32	0.361	0.00713
FRMD4A	2.52999e-07	-0.338241	0.269	0.312	0.00782449
PABPC4	3.06056e-07	-0.358458	0.204	0.245	0.00946539
AL512422.1	3.13576e-07	-0.279118	0.088	0.124	0.00969795
KANSL1	4.04489e-07	-0.324487	0.361	0.391	0.0125096
DNAH7	4.22602e-07	-0.392573	0.277	0.314	0.0130698
ARHGAP39	4.41242e-07	0.261854	0.114	0.079	0.0136463
ICA1L	4.84474e-07	-0.260202	0.184	0.228	0.0149833
VSIR	5.34148e-07	0.267144	0.106	0.073	0.0165196
RPL21	6.55646e-07	-0.323429	0.118	0.154	0.0202772
ADAMTS17	7.98985e-07	-0.376973	0.164	0.203	0.0247102
TMEM241	8.331e-07	-0.286281	0.204	0.249	0.0257653
CCDC7	8.5691e-07	-0.298547	0.157	0.198	0.0265017
DANT2	8.88833e-07	-0.255696	0.375	0.413	0.0274889
F3	1.09542e-06	-0.440491	0.278	0.315	0.0338782
NCKAP5	1.22884e-06	-0.260024	0.348	0.392	0.0380044
RPL15	1.52378e-06	-0.286671	0.082	0.114	0.047126
ANKRD28	1.68929e-06	-0.274605	0.163	0.201	0.0522445
ENHO	2.04739e-06	-0.264226	0.076	0.107	0.0633197
AC093535.1	2.20745e-06	-0.332782	0.253	0.292	0.0682699
LINC00499	2.22305e-06	0.345792	0.454	0.42	0.0687521
ST18	2.35344e-06	-0.319076	0.078	0.109	0.0727848
FGF14	2.97521e-06	-0.252999	0.156	0.196	0.0920143
DECR1	3.08777e-06	-0.268523	0.124	0.16	0.0954953
MSMO1	3.23967e-06	-0.267651	0.08	0.111	0.100193
ST6GALNAC3	3.60278e-06	-0.277009	0.169	0.208	0.111423
BTD	3.91183e-06	-0.278677	0.11	0.143	0.120981
AQP4-AS1	5.62545e-06	-0.319441	0.306	0.343	0.173978
PRDX1	7.60841e-06	-0.289933	0.121	0.154	0.235305
LDB2	7.64653e-06	-0.253849	0.074	0.103	0.236484
GABPB1-AS1	8.10251e-06	-0.367612	0.179	0.215	0.250586
SYT1	1.11718e-05	-0.275977	0.18	0.218	0.34551
FAM189A2	1.25141e-05	-0.358358	0.352	0.371	0.387024
EMID1	1.25572e-05	-0.320271	0.129	0.162	0.388355
PDZD2	1.28999e-05	-0.32977	0.124	0.156	0.398955
RYR2	1.3176e-05	-0.28906	0.085	0.115	0.407493
AC046134.2	1.34974e-05	-0.263498	0.194	0.231	0.417435
EPHB1	1.45122e-05	-0.329879	0.265	0.297	0.448818
LRRC4C	2.22097e-05	-0.267601	0.382	0.409	0.686879
DPP6	2.42712e-05	-0.264835	0.204	0.239	0.750635
OSBPL1A	2.63642e-05	-0.333044	0.283	0.315	0.815364
SLC24A2	2.91209e-05	-0.383335	0.1	0.129	0.900624
CADPS	6.08248e-05	0.339289	0.185	0.153	1
ANGPTL4	4.16161e-05	0.251329	0.273	0.233	1
ROBO3	0.000661383	-0.253073	0.199	0.226	1
IQCJ-SCHIP1	3.70366e-05	-0.253106	0.17	0.206	1
ADAMTSL3	0.000956371	-0.254837	0.095	0.118	1
PTN	0.0097871	-0.255488	0.366	0.372	1
ANKS1B	6.54793e-05	-0.25759	0.399	0.424	1
LUCAT1	0.0234462	-0.257763	0.212	0.226	1
ALDOC	0.000508447	-0.257849	0.197	0.226	1
TMEM164	4.30746e-05	-0.258071	0.185	0.219	1
JAK1	4.21328e-05	-0.259664	0.351	0.379	1
AC091078.1	9.35893e-05	-0.259703	0.148	0.178	1
BRINP2	0.00622104	-0.261467	0.128	0.147	1
AL137009.1	0.0583009	-0.261711	0.162	0.173	1
HHATL	0.000256507	-0.261984	0.137	0.164	1
NDUFA4	9.68457e-05	-0.264801	0.133	0.163	1
C2CD5	0.000103508	-0.267856	0.13	0.159	1
ZRANB3	0.000997083	-0.267936	0.132	0.155	1
AC016716.2	0.00409611	-0.268186	0.153	0.173	1
DGLUCY	0.000162728	-0.272559	0.186	0.217	1
GARNL3	0.000151415	-0.27391	0.153	0.181	1
ZFYVE16	0.000353117	-0.275203	0.248	0.276	1
EMX2	0.000613668	-0.276709	0.187	0.214	1
CD63	0.0322205	-0.281045	0.137	0.15	1
AC008771.1	9.7404e-05	-0.287339	0.189	0.219	1
ENTPD1-AS1	3.47653e-05	-0.287728	0.291	0.32	1
KLHL32	0.00719679	-0.29001	0.185	0.202	1
MEIKIN	0.0246514	-0.293884	0.219	0.231	1
HMGN3	0.0262652	-0.294118	0.226	0.236	1
ANK3	0.000168124	-0.294951	0.115	0.142	1
RPS27	0.000260467	-0.299809	0.31	0.338	1
TF	3.66276e-05	-0.304047	0.11	0.139	1
CRLF3	3.62085e-05	-0.306278	0.213	0.246	1
GLCCI1	0.00938468	-0.309521	0.134	0.151	1
HIP1R	4.52816e-05	-0.33724	0.233	0.264	1
UNC5D	3.97869e-05	-0.337371	0.094	0.121	1
CLDN10	0.00178321	-0.348372	0.152	0.173	1
BAALC-AS1	3.93668e-05	-0.395955	0.187	0.217	1
ID2	0.0447066	-0.470763	0.175	0.184	1
