# Supplementary material for: RNA isoform diversity, splicing variants, and switching in single cells of the Alzheimer’s disease brain
Source: Research Square preprint supplement (doi:10.21203/rs.3.rs-7436496/v1), 2025-09-29
Supplement: Supplementary file 4 [file 65004bc525dfdf7d1b1b6dd0.xlsx]

## Sheet: README
Supplementary Table 1
SampleInfo tab has sample demographic information
Short-read QC has batch information and cellranger QC values
Long-read QC has numbers of reads/isoforms resulting from each step of the analysis pipeline

## Sheet: SampleInfo
Sample Name	Sample ID	Tissue Type	Subregion (BA)	Sample Type / Disease	Source	Sex	Age at death	RIN (SBP)
MA1	13106	Frontal cortex	BA 8	Control	Pittsburgh (NBB)	M	59	8.6
MA2	E05-04	Frontal cortex	BA 8/9	AD	Emory	F	64 (duration: 13 yrs)	8.1
MA3	5801	Frontal cortex	BA 8	Control	Sepulveda (NBB)	F	56	8.8
MA4	OS00-11	Frontal cortex	BA 8/9	AD	Emory	M	55 (duration: 6 yrs)	6.1
MA5	E08-108	Frontal cortex	BA 8/9	AD	Emory	F	94	7.9
MA6	C103	Prefrontal cortex	N/A	Control	Parkinson's UK/Imperial	F	95	7.3
MA7	E16-45	Frontal cortex	BA 8/9	Control	Emory	M	70	7
MA8	E05-194	Frontal cortex	BA 8/9	AD	Emory	M	71 (duration: 2.5 yrs)	7.1
MA9	OS99-03	Frontal cortex	BA 8/9	AD	Emory	M	93 (duration: 10 yrs)	7.5
MA10	E10-142	Frontal cortex	BA 8/9	Control	Emory	M	94	7.6
MA11	1065	Frontal cortex	BA 8, 9, 10	AD	Southwest Dem. BB	F	73	7.2
MA12	OS99-08	Frontal cortex	BA 8/9	Control	Emory	F	74	7.7
MA14	E14-134	Frontal cortex	BA 8/9	AD	Emory	M	72	7.9
MA15	1059	Frontal cortex	BA 8, 9, 10	AD	Southwest Dem. BB	F	84	7.8
MA16	C043	Frontal cortex	N/A	Control	Parkinson's UK/Imperial	F	87	7.2

## Sheet: Short-read QC
	Batch Information				CellRanger QC
Sample	Droplet Batch	Library Prep Batch	Sequencing Batch		Cells	Mean Reads/Cell	Median Genes/Cell	Sequencing Saturation	Fraction Reads in Cells	Total Genes Detected	Median UMI counts/cell
MA1	1	1	1		5487	60706	1013	91.4	85.2	29286	1530
MA2	1	1	1		4902	58910	1544	86.7	85.3	28638	2758
MA3	1	1	1		5319	69303	1954	83.8	88.8	30324	3789
MA4	1	1	1		5600	50268	1748	82.1	87	28504	3198
MA5	2	2	1		6655	53148	970	85.9	77.5	29437	1253
MA6	2	2	1		8165	47232	817	85.2	71.4	29527	1029
MA7	2	2	1		13254	36051	1134	77.1	70.2	30927	1516
MA8	2	2	1		5520	83907	894	89.4	71	28848	1138
MA9	3	3	1		4268	113243	1852	89.1	88.2	30014	3226
MA10	3	3	1		4890	86691	1539	84.5	86.9	30203	2684
MA11	3	3	1		7828	34037	1568	76.6	82.6	30390	2377
MA12	3	3	1		5246	106671	1111	93	83.5	30051	1572
MA14	4	3	1		8438	28929	1322	72.6	88	30363	2055
MA15	4	3	1		7275	56602	1225	82.5	89.3	30639	1911
MA16	4	3	1		7176	53482	1492	74.5	91.7	31137	2473

## Sheet: Long-read QC
Sample	Subreads	CCS (ZMWs)	Skera (S-reads)	Demultiplex (remove primers, orient)	Tag	Refine (remove polyA, concatemers)	Correct (barcodes)	groupdedup (PCR dedup)	cDNA Cupcake (isoforms)	cDNA Cupcake (reads)	SQANTI3 filter (isoforms)	SQANTI3 filter (reads)
MA1	5977544	2713533	42359781	42192743	42178253	39190272	39130421	15647758	2544835	12469734	214223	3595537
MA2	6123731	2701178	42248323	42085590	42068387	39595005	39534189	18868736	2778036	15943945	256027	5271229
MA3	6108861	2419766	35803250	35656712	35616910	33350820	33295562	21174957	3265497	17359615	278567	5459460
MA4	4907763	2436155	38421925	38338807	38311108	34034753	33988265	21099281	2806576	17288785	180142	4397216
MA5	4900576	1488173	22761191	22652145	22625420	19005995	18935685	10580513	2351201	8076968	124196	1413631
MA6	5002315	1664578	25416757	25301835	25255690	19758179	19679793	10040975	2400620	7518521	104520	1028852
MA7	3184910	1156545	17767715	17708344	17695857	11963716	11912311	5133432	1521838	4047390	66901	616122
MA8	4580357	940227	13296874	13231217	13209557	9432178	9300243	5416176	1624250	4021477	64762	417221
MA9	5532695	2194623	34701352	34488387	27654457	22122401	22084668	14243690	2869776	10769778	140715	1813545
MA10	5358548	2096884	33186496	33035202	28643841	22442385	22403147	15181193	2854095	11305782	139750	2026203
MA11	5366631	2179236	34438571	34337198	33374852	27825128	27780206	17594793	3190114	12713847	149893	2293564
MA12	5162554	2133915	33676398	33558927	31786840	27298492	27253293	14385441	2777701	10397165	129369	1563505
MA14	5770617	2453555	38611080	38438397	32525883	27217746	27169293	19180655	3254938	14533658	183297	2913141
MA15	5333390	2259662	35666577	35467895	28441872	23570785	23530322	16952163	3050285	13041964	176733	2399100
MA16	5412892	2320116	36458090	36327632	35688624	31804713	31753405	23715757	4192933	18440557	171355	2226900
