# Supplementary material for: RNA isoform diversity, splicing variants, and switching in single cells of the Alzheimer’s disease brain
Source: Research Square preprint supplement (doi:10.21203/rs.3.rs-7436496/v1), 2025-09-29
Supplement: Supplementary file 5 [file 7e6684dd938577a5c623d6e6.xlsx]

## Sheet: README
Supplementary Table 4
isoSeQL table output of all isoforms filtered CPM >= 1, detected in 4+ samples

## Sheet: confident_isoforms
isoform_id	gene	category	subcategory	IEJ	1	2	3	4	5	6	7	8	9	10	11	12	13	14	15	1_cpm	2_cpm	3_cpm	4_cpm	5_cpm	6_cpm	7_cpm	8_cpm	9_cpm	10_cpm	11_cpm	12_cpm	13_cpm	14_cpm	15_cpm	count_cpm1
4	MAFIP	novel_not_in_catalog	UTR_UTR	TRUE	32	2	8	1	0	2	0	0	1	4	0	0	0	0	5	9.01663	0.382188	1.47172	0.228171	0	1.96161	0	0	0.553717	1.98037	0	0	0	0	2.25096	5
6	ENSG00000277400	incomplete-splice_match	5prime_fragment	FALSE	388	399	1035	130	182	46	1	32	31	27	15	253	110	66	315	109.327	76.2465	190.404	29.6622	129.915	45.117	1.62645	68.3336	17.1652	13.3675	6.55981	162.917	37.8707	27.5997	141.811	15
7	ENSG00000277400	novel_not_in_catalog	novel_exon	FALSE	45	49	192	34	7	2	0	17	3	4	0	35	58	10	50	12.6796	9.36361	35.3213	7.7578	4.99672	1.96161	0	36.3022	1.66115	1.98037	0	22.5379	19.9682	4.18177	22.5096	13
9	MAFIP	novel_not_in_catalog	UTR_UTR	TRUE	12	25	57	0	5	0	3	0	2	1	9	0	2	2	10	3.38124	4.77735	10.486	0	3.56909	0	4.87934	0	1.10743	0.495093	3.93589	0	0.688558	0.836354	4.50192	8
23	ENSG00000276256	novel_not_in_catalog	novel_exon	FALSE	11	4	7	0	2	5	0	0	6	0	1	5	18	2	1	3.09947	0.764376	1.28775	0	1.42764	4.90402	0	0	3.3223	0	0.437321	3.21971	6.19702	0.836354	0.450192	7
26	ENSG00000278384	full-splice_match	mono-exon	FALSE	2	2	20	15	10	7	0	4	0	24	6	4	24	13	2	0.563539	0.382188	3.6793	3.42256	7.13818	6.86563	0	8.5417	0	11.8822	2.62392	2.57576	8.2627	5.4363	0.900384	10
39	ENSG00000273748	novel_not_in_catalog	novel_exon	FALSE	15	5	11	56	15	1	0	0	1	32	0	0	0	56	0	4.22655	0.95547	2.02361	12.7776	10.7073	0.980804	0	0	0.553717	15.843	0	0	0	23.4179	0	6
40	ENSG00000273748	novel_not_in_catalog	novel_exon	FALSE	13	12	74	2	1	1	0	0	2	3	0	11	0	8	1	3.66301	2.29313	13.6134	0.456341	0.713818	0.980804	0	0	1.10743	1.48528	0	7.08335	0	3.34542	0.450192	7
41	ENSG00000273748	novel_not_in_catalog	novel_exon	FALSE	2	20	28	12	0	1	0	0	3	0	0	0	0	9	2	0.563539	3.82188	5.15102	2.73805	0	0.980804	0	0	1.66115	0	0	0	0	3.76359	0.900384	5
43	ENSG00000273748	novel_not_in_catalog	novel_exon	FALSE	7	29	76	4	0	2	0	1	23	6	0	7	28	6	33	1.97239	5.54173	13.9813	0.912682	0	1.96161	0	2.13542	12.7355	2.97056	0	4.50759	9.63982	2.50906	14.8563	11
44	ENSG00000273748	novel_not_in_catalog	novel_exon	FALSE	1	34	95	9	13	7	2	0	0	12	0	34	13	0	0	0.28177	6.4972	17.4767	2.05354	9.27963	6.86563	3.25289	0	0	5.94112	0	21.894	4.47563	0	0	9
45	ENSG00000273748	novel_not_in_catalog	novel_exon	FALSE	13	24	40	16	7	0	1	4	0	1	11	25	0	29	0	3.66301	4.58626	7.3586	3.65073	4.99672	0	1.62645	8.5417	0	0.495093	4.81053	16.0985	0	12.1271	0	10
92	SUMO2P1	full-splice_match	mono-exon	FALSE	2	1	1	7	2	1	0	1	2	1	3	1	2	1	1	0.563539	0.191094	0.183965	1.59719	1.42764	0.980804	0	2.13542	1.10743	0.495093	1.31196	0.643941	0.688558	0.418177	0.450192	5
93	MOG	novel_not_in_catalog	partial_intron_retention	FALSE	29	37	25	0	0	0	1	0	6	0	0	7	0	0	0	8.17132	7.07048	4.59912	0	0	0	1.62645	0	3.3223	0	0	4.50759	0	0	0	6
94	MOG	novel_not_in_catalog	partial_intron_retention	FALSE	6	65	14	5	4	7	0	0	4	0	0	1	1	0	2	1.69062	12.4211	2.57551	1.14085	2.85527	6.86563	0	0	2.21487	0	0	0.643941	0.344279	0	0.900384	7
95	MOG	full-splice_match	alternative_3end	FALSE	4	26	57	7	4	3	2	0	12	0	2	2	2	3	5	1.12708	4.96845	10.486	1.59719	2.85527	2.94241	3.25289	0	6.6446	0	0.874642	1.28788	0.688558	1.25453	2.25096	11
100	HLA-A	novel_not_in_catalog	novel_exon	FALSE	4	16	33	0	0	0	0	0	0	0	0	0	0	11	0	1.12708	3.05751	6.07084	0	0	0	0	0	0	0	0	0	0	4.59995	0	4
102	POLR1HASP	full-splice_match	mono-exon	FALSE	4	6	3	5	6	3	0	0	2	5	3	5	1	4	12	1.12708	1.14656	0.551895	1.14085	4.28291	2.94241	0	0	1.10743	2.47547	1.31196	3.21971	0.344279	1.67271	5.40231	11
104	POLR1H	full-splice_match	reference_match	FALSE	4	10	4	10	0	0	0	0	2	9	4	0	0	7	0	1.12708	1.91094	0.73586	2.28171	0	0	0	0	1.10743	4.45584	1.74928	0	0	2.92724	0	7
117	PPP1R11	full-splice_match	alternative_5end	FALSE	3	35	26	1	1	0	0	0	4	23	2	11	0	20	0	0.845309	6.68829	4.78309	0.228171	0.713818	0	0	0	2.21487	11.3871	0.874642	7.08335	0	8.36354	0	6
118	RPP21	full-splice_match	reference_match	FALSE	17	0	7	0	0	1	4	3	2	0	0	0	0	0	4	4.79008	0	1.28775	0	0	0.980804	6.50579	6.40627	1.10743	0	0	0	0	0	1.80077	6
119	RPP21	full-splice_match	reference_match	FALSE	51	0	94	47	7	4	2	1	39	0	0	14	0	0	36	14.3703	0	17.2927	10.724	4.99672	3.92321	3.25289	2.13542	21.5949	0	0	9.01518	0	0	16.2069	10
122	RPP21	full-splice_match	reference_match	FALSE	7	0	10	4	11	2	4	1	3	0	0	2	0	0	5	1.97239	0	1.83965	0.912682	7.85199	1.96161	6.50579	2.13542	1.66115	0	0	1.28788	0	0	2.25096	9
128	TUBB	full-splice_match	alternative_3end5end	FALSE	8	114	58	243	39	0	26	0	58	164	110	0	178	17	0	2.25416	21.7847	10.67	55.4455	27.8389	0	42.2876	0	32.1156	81.1953	48.1053	0	61.2817	7.10901	0	11
129	FLOT1	incomplete-splice_match	3prime_fragment	FALSE	33	6	0	9	3	0	0	6	0	1	16	4	0	0	5	9.2984	1.14656	0	2.05354	2.14145	0	0	12.8125	0	0.495093	6.99713	2.57576	0	0	2.25096	8
130	DDX39B	incomplete-splice_match	3prime_fragment	FALSE	31	84	35	101	33	16	0	0	0	1	48	2	4	46	83	8.73486	16.0519	6.43877	23.0452	23.556	15.6929	0	0	0	0.495093	20.9914	1.28788	1.37712	19.2361	37.3659	11
140	LSM2	full-splice_match	reference_match	FALSE	52	73	90	30	8	9	4	4	10	15	11	9	6	21	11	14.652	13.9499	16.5568	6.84512	5.71054	8.82723	6.50579	8.5417	5.53717	7.4264	4.81053	5.79547	2.06567	8.78172	4.95211	15
145	HSPA1A	full-splice_match	mono-exon	FALSE	42	27	49	424	207	96	15	11	184	109	168	57	186	1453	511	11.8343	5.15954	9.01428	96.7443	147.76	94.1572	24.3967	23.4897	101.884	53.9652	73.4699	36.7046	64.0359	607.611	230.048	15
146	HSPA1B	full-splice_match	mono-exon	FALSE	45	113	44	6	62	24	2	9	38	24	50	9	36	246	192	12.6796	21.5936	8.09446	1.36902	44.2567	23.5393	3.25289	19.2188	21.0412	11.8822	21.866	5.79547	12.394	102.872	86.4369	15
147	SNHG32	full-splice_match	alternative_5end	FALSE	73	63	87	21	0	9	0	4	41	19	17	13	21	18	28	20.5692	12.0389	16.0049	4.79158	0	8.82723	0	8.5417	22.7024	9.40677	7.43445	8.37123	7.22986	7.52719	12.6054	13
149	SNHG32	full-splice_match	reference_match	FALSE	9	52	14	3	0	1	0	0	4	2	0	0	1	27	0	2.53593	9.93689	2.57551	0.684512	0	0.980804	0	0	2.21487	0.990186	0	0	0.344279	11.2908	0	5
164	PSMB8	full-splice_match	reference_match	FALSE	4	11	14	7	2	0	0	0	5	2	0	0	0	1	0	1.12708	2.10204	2.57551	1.59719	1.42764	0	0	0	2.76858	0.990186	0	0	0	0.418177	0	6
178	PPP1R11	full-splice_match	alternative_5end	FALSE	14	51	23	2	4	5	0	0	0	1	0	0	0	19	0	3.94478	9.7458	4.23119	0.456341	2.85527	4.90402	0	0	0	0.495093	0	0	0	7.94537	0	6
188	ABCF1	incomplete-splice_match	5prime_fragment	FALSE	12	13	11	11	0	0	4	2	3	6	9	8	7	4	3	3.38124	2.48422	2.02361	2.50988	0	0	6.50579	4.27085	1.66115	2.97056	3.93589	5.15153	2.40995	1.67271	1.35058	13
193	MRPS18B	full-splice_match	alternative_5end	FALSE	19	47	21	38	0	0	0	0	12	9	0	0	1	14	0	5.35362	8.98142	3.86326	8.67048	0	0	0	0	6.6446	4.45584	0	0	0.344279	5.85448	0	7
196	MOG	full-splice_match	alternative_3end5end	FALSE	12	40	28	9	2	0	0	1	10	1	0	7	2	1	3	3.38124	7.64376	5.15102	2.05354	1.42764	0	0	2.13542	5.53717	0.495093	0	4.50759	0.688558	0.418177	1.35058	9
200	C6orf136	full-splice_match	alternative_3end5end	FALSE	7	21	13	42	18	16	5	0	0	35	29	19	0	16	0	1.97239	4.01298	2.39154	9.58316	12.8487	15.6929	8.13224	0	0	17.3283	12.6823	12.2349	0	6.69083	0	11
205	TUBB	full-splice_match	alternative_3end5end	FALSE	1	109	62	55	30	0	0	0	0	146	104	70	0	49	33	0.28177	20.8293	11.4058	12.5494	21.4145	0	0	0	0	72.2836	45.4814	45.0759	0	20.4907	14.8563	9
211	MOG	novel_not_in_catalog	partial_intron_retention	FALSE	9	63	56	9	0	2	1	0	9	0	0	7	4	8	0	2.53593	12.0389	10.302	2.05354	0	1.96161	1.62645	0	4.98345	0	0	4.50759	1.37712	3.34542	0	10
215	NFKBIL1	full-splice_match	reference_match	FALSE	13	7	1	0	0	3	0	1	0	0	0	0	0	1	0	3.66301	1.33766	0.183965	0	0	2.94241	0	2.13542	0	0	0	0	0	0.418177	0	4
220	AIF1	full-splice_match	reference_match	FALSE	4	9	15	0	0	0	0	0	0	1	1	3	6	0	2	1.12708	1.71985	2.75947	0	0	0	0	0	0	0.495093	0.437321	1.93182	2.06567	0	0.900384	5
221	AIF1	full-splice_match	reference_match	FALSE	7	7	67	1	2	1	0	0	3	0	7	1	3	2	0	1.97239	1.33766	12.3256	0.228171	1.42764	0.980804	0	0	1.66115	0	3.06125	0.643941	1.03284	0.836354	0	7
225	PRRC2A	incomplete-splice_match	3prime_fragment	FALSE	16	21	0	0	18	0	0	0	66	1	58	81	1	36	78	4.50831	4.01298	0	0	12.8487	0	0	0	36.5453	0.495093	25.3646	52.1592	0.344279	15.0544	35.115	8
227	CSNK2B	full-splice_match	reference_match	FALSE	70	94	113	76	0	0	0	0	32	71	23	36	86	93	33	19.7239	17.9628	20.788	17.341	0	0	0	0	17.7189	35.1516	10.0584	23.1819	29.608	38.8905	14.8563	11
230	HSPA1A	full-splice_match	mono-exon	FALSE	115	449	165	244	27	48	10	38	123	97	102	77	187	590	413	32.4035	85.8012	30.3542	55.6736	19.2731	47.0786	16.2645	81.1461	68.1071	48.024	44.6067	49.5835	64.3802	246.725	185.929	15
232	HSPA1B	full-splice_match	mono-exon	FALSE	65	90	53	70	41	11	1	23	21	110	46	30	97	367	163	18.315	17.1985	9.75014	15.9719	29.2665	10.7888	1.62645	49.1148	11.628	54.4602	20.1168	19.3182	33.3951	153.471	73.3813	15
233	HSPA1B	novel_not_in_catalog	CDS_CDS	TRUE	1	5	0	6	0	0	1	1	0	0	1	0	1	5	0	0.28177	0.95547	0	1.36902	0	0	1.62645	2.13542	0	0	0.437321	0	0.344279	2.09089	0	4
236	SNHG32	full-splice_match	alternative_5end	FALSE	22	24	33	6	0	0	0	0	7	6	7	1	46	5	1	6.19893	4.58626	6.07084	1.36902	0	0	0	0	3.87602	2.97056	3.06125	0.643941	15.8368	2.09089	0.450192	9
237	SNHG32	full-splice_match	reference_match	FALSE	15	81	87	7	1	10	0	0	23	16	4	2	8	6	8	4.22655	15.4786	16.0049	1.59719	0.713818	9.80804	0	0	12.7355	7.92149	1.74928	1.28788	2.75423	2.50906	3.60154	12
242	SKIC2	incomplete-splice_match	3prime_fragment	FALSE	4	0	28	0	5	1	0	3	11	0	0	17	0	0	0	1.12708	0	5.15102	0	3.56909	0.980804	0	6.40627	6.09088	0	0	10.947	0	0	0	6
245	EGFL8	incomplete-splice_match	3prime_fragment	FALSE	8	0	0	5	0	0	0	1	2	0	0	3	0	1	0	2.25416	0	0	1.14085	0	0	0	2.13542	1.10743	0	0	1.93182	0	0.418177	0	5
259	PSMB9	full-splice_match	reference_match	FALSE	11	20	24	9	0	0	0	0	1	0	2	0	2	0	1	3.09947	3.82188	4.41516	2.05354	0	0	0	0	0.553717	0	0.874642	0	0.688558	0	0.450192	4
267	HLA-A	novel_not_in_catalog	novel_exon	FALSE	5	20	41	0	0	0	0	0	0	0	0	0	0	14	0	1.40885	3.82188	7.54256	0	0	0	0	0	0	0	0	0	0	5.85448	0	4
273	HLA-DPB1	full-splice_match	alternative_3end	FALSE	21	0	0	0	0	0	0	0	0	14	18	0	0	0	25	5.91716	0	0	0	0	0	0	0	0	6.9313	7.87177	0	0	0	11.2548	4
287	GNL1	incomplete-splice_match	3prime_fragment	FALSE	14	0	16	18	0	0	0	0	0	0	0	0	0	10	0	3.94478	0	2.94344	4.10707	0	0	0	0	0	0	0	0	0	4.18177	0	4
289	PPP1R10	incomplete-splice_match	5prime_fragment	FALSE	21	16	26	10	24	12	7	3	11	10	12	18	12	19	12	5.91716	3.05751	4.78309	2.28171	17.1316	11.7696	11.3851	6.40627	6.09088	4.95093	5.24785	11.5909	4.13135	7.94537	5.40231	15
291	DHX16	incomplete-splice_match	3prime_fragment	FALSE	7	0	0	0	0	3	0	0	2	0	0	0	6	2	0	1.97239	0	0	0	0	2.94241	0	0	1.10743	0	0	0	2.06567	0.836354	0	4
296	FLOT1	full-splice_match	alternative_3end	FALSE	27	21	26	87	0	17	0	0	2	77	10	0	0	23	4	7.60778	4.01298	4.78309	19.8508	0	16.6737	0	0	1.10743	38.1222	4.37321	0	0	9.61807	1.80077	10
301	IER3	full-splice_match	mono-exon	FALSE	8	6	1	8	2	5	0	0	0	4	8	0	17	3	1	2.25416	1.14656	0.183965	1.82536	1.42764	4.90402	0	0	0	1.98037	3.49857	0	5.85274	1.25453	0.450192	9
302	HCG21	novel_not_in_catalog	novel_exon	FALSE	1	0	5	0	2	0	0	1	2	1	0	0	3	1	1	0.28177	0	0.919825	0	1.42764	0	0	2.13542	1.10743	0.495093	0	0	1.03284	0.418177	0.450192	4
305	ABHD16A	full-splice_match	alternative_5end	FALSE	26	11	37	0	0	10	0	0	0	0	39	0	60	0	0	7.32601	2.10204	6.8067	0	0	9.80804	0	0	0	0	17.0555	0	20.6567	0	0	6
309	DDAH2	full-splice_match	alternative_5end	FALSE	4	16	8	8	8	3	0	0	0	0	0	0	0	5	0	1.12708	3.05751	1.47172	1.82536	5.71054	2.94241	0	0	0	0	0	0	0	2.09089	0	7
313	CLIC1	full-splice_match	alternative_5end	FALSE	5	17	24	0	0	0	0	0	0	0	5	0	5	0	4	1.40885	3.2486	4.41516	0	0	0	0	0	0	0	2.1866	0	1.7214	0	1.80077	6
315	VARS1	incomplete-splice_match	3prime_fragment	FALSE	13	0	0	0	8	0	0	0	17	0	0	14	0	0	0	3.66301	0	0	0	5.71054	0	0	0	9.41318	0	0	9.01518	0	0	0	4
318	LSM2	full-splice_match	alternative_3end5end	FALSE	59	100	95	51	3	4	0	4	30	20	8	12	24	34	22	16.6244	19.1094	17.4767	11.6367	2.14145	3.92321	0	8.5417	16.6115	9.90186	3.49857	7.72729	8.2627	14.218	9.90423	14
326	EHMT2	incomplete-splice_match	3prime_fragment	FALSE	1	0	20	50	0	0	7	0	7	0	1	2	0	0	0	0.28177	0	3.6793	11.4085	0	0	11.3851	0	3.87602	0	0.437321	1.28788	0	0	0	5
329	HLA-B	full-splice_match	reference_match	FALSE	17	0	0	0	2	0	2	0	0	0	0	0	96	0	0	4.79008	0	0	0	1.42764	0	3.25289	0	0	0	0	0	33.0508	0	0	4
330	NELFE	full-splice_match	alternative_3end	FALSE	19	27	20	11	0	0	0	0	5	0	0	0	21	9	0	5.35362	5.15954	3.6793	2.50988	0	0	0	0	2.76858	0	0	0	7.22986	3.76359	0	7
334	NELFE	incomplete-splice_match	5prime_fragment	FALSE	22	20	30	8	0	4	2	1	9	4	9	5	8	12	3	6.19893	3.82188	5.51895	1.82536	0	3.92321	3.25289	2.13542	4.98345	1.98037	3.93589	3.21971	2.75423	5.01813	1.35058	14
348	PRRT1	full-splice_match	alternative_5end	FALSE	13	1	8	3	1	1	0	0	1	2	4	0	3	12	3	3.66301	0.191094	1.47172	0.684512	0.713818	0.980804	0	0	0.553717	0.990186	1.74928	0	1.03284	5.01813	1.35058	6
351	PRRT1	full-splice_match	reference_match	FALSE	2	3	1	1	0	3	4	1	1	0	0	10	1	1	2	0.563539	0.573282	0.183965	0.228171	0	2.94241	6.50579	2.13542	0.553717	0	0	6.43941	0.344279	0.418177	0.900384	4
361	HLA-DRB1	full-splice_match	alternative_3end	FALSE	67	0	79	45	0	4	0	2	0	16	0	0	2	16	0	18.8786	0	14.5332	10.2677	0	3.92321	0	4.27085	0	7.92149	0	0	0.688558	6.69083	0	7
370	DDX39B	incomplete-splice_match	3prime_fragment	FALSE	32	3	2	0	0	12	0	0	45	0	65	45	18	0	11	9.01663	0.573282	0.36793	0	0	11.7696	0	0	24.9172	0	28.4259	28.9774	6.19702	0	4.95211	7
375	DDX39B	full-splice_match	alternative_5end	FALSE	7	6	57	0	0	0	0	0	0	8	0	0	0	0	0	1.97239	1.14656	10.486	0	0	0	0	0	0	3.96075	0	0	0	0	0	4
377	HLA-DPA1	full-splice_match	alternative_3end	FALSE	15	21	26	0	0	0	0	0	0	0	0	6	0	0	6	4.22655	4.01298	4.78309	0	0	0	0	0	0	0	0	3.86365	0	0	2.70115	5
388	ATP6V1G2	full-splice_match	alternative_5end	FALSE	212	186	230	0	4	38	0	0	218	514	9	2	567	5	1	59.7352	35.5435	42.3119	0	2.85527	37.2705	0	0	120.71	254.478	3.93589	1.28788	195.206	2.09089	0.450192	11
400	C6orf47	full-splice_match	mono-exon	FALSE	6	22	8	13	3	1	1	3	3	7	12	3	20	7	11	1.69062	4.20407	1.47172	2.96622	2.14145	0.980804	1.62645	6.40627	1.66115	3.46565	5.24785	1.93182	6.88558	2.92724	4.95211	14
409	RING1	full-splice_match	reference_match	FALSE	21	85	0	27	48	0	0	27	0	0	0	0	3	0	0	5.91716	16.243	0	6.16061	34.2632	0	0	57.6565	0	0	0	0	1.03284	0	0	6
410	RING1	novel_in_catalog	combination_of_known_junctions,intron_retention	FALSE	1	0	0	1	5	18	24	0	40	0	0	0	0	0	21	0.28177	0	0	0.228171	3.56909	17.6545	39.0347	0	22.1487	0	0	0	0	0	9.45403	5
414	RPS18	full-splice_match	reference_match	FALSE	711	967	504	466	70	61	31	48	329	289	381	191	225	426	305	200.338	184.788	92.7183	106.327	49.9672	59.829	50.4199	102.5	182.173	143.082	166.619	122.993	77.4628	178.143	137.309	15
415	RPS18	incomplete-splice_match	5prime_fragment	FALSE	12	13	13	9	0	1	1	0	3	2	10	5	4	6	4	3.38124	2.48422	2.39154	2.05354	0	0.980804	1.62645	0	1.66115	0.990186	4.37321	3.21971	1.37712	2.50906	1.80077	11
420	RPS18	incomplete-splice_match	3prime_fragment	FALSE	16	43	24	25	1	1	1	1	9	9	13	8	2	15	5	4.50831	8.21705	4.41516	5.70426	0.713818	0.980804	1.62645	2.13542	4.98345	4.45584	5.68517	5.15153	0.688558	6.27266	2.25096	12
421	B3GALT4	full-splice_match	mono-exon	FALSE	5	12	24	7	2	1	0	3	7	3	0	0	11	3	3	1.40885	2.29313	4.41516	1.59719	1.42764	0.980804	0	6.40627	3.87602	1.48528	0	0	3.78707	1.25453	1.35058	11
426	PFDN6	full-splice_match	alternative_5end	FALSE	49	27	67	44	2	0	4	0	13	19	19	21	19	28	15	13.8067	5.15954	12.3256	10.0395	1.42764	0	6.50579	0	7.19832	9.40677	8.30909	13.5228	6.5413	11.709	6.75288	13
428	PFDN6	full-splice_match	reference_match	FALSE	2	7	7	3	1	1	0	0	2	1	2	2	1	1	3	0.563539	1.33766	1.28775	0.684512	0.713818	0.980804	0	0	1.10743	0.495093	0.874642	1.28788	0.344279	0.418177	1.35058	5
434	PFDN6	incomplete-splice_match	5prime_fragment	FALSE	6	4	4	0	1	0	1	1	4	0	3	2	2	2	1	1.69062	0.764376	0.73586	0	0.713818	0	1.62645	2.13542	2.21487	0	1.31196	1.28788	0.688558	0.836354	0.450192	6
442	RGL2	incomplete-splice_match	3prime_fragment	FALSE	2	1	0	0	0	33	11	0	0	0	54	24	0	0	28	0.563539	0.191094	0	0	0	32.3665	17.8909	0	0	0	23.6153	15.4546	0	0	12.6054	5
443	RGL2	incomplete-splice_match	3prime_fragment	FALSE	2	39	0	15	5	0	0	0	0	25	0	0	11	0	0	0.563539	7.45267	0	3.42256	3.56909	0	0	0	0	12.3773	0	0	3.78707	0	0	5
447	DAXX	incomplete-splice_match	3prime_fragment	FALSE	7	28	0	14	0	3	5	0	0	26	0	0	0	0	25	1.97239	5.35063	0	3.19439	0	2.94241	8.13224	0	0	12.8724	0	0	0	0	11.2548	7
458	MOG	full-splice_match	alternative_3end5end	FALSE	13	32	54	6	1	2	0	2	4	0	1	9	0	5	2	3.66301	6.11501	9.93411	1.36902	0.713818	1.96161	0	4.27085	2.21487	0	0.437321	5.79547	0	2.09089	0.900384	9
460	MOG	novel_not_in_catalog	partial_intron_retention	FALSE	9	35	36	0	3	0	0	2	12	0	0	4	0	0	4	2.53593	6.68829	6.62274	0	2.14145	0	0	4.27085	6.6446	0	0	2.57576	0	0	1.80077	8
470	HLA-A	full-splice_match	reference_match	FALSE	75	0	0	0	0	0	0	0	81	87	55	0	0	185	77	21.1327	0	0	0	0	0	0	0	44.851	43.0731	24.0526	0	0	77.3628	34.6648	6
479	HLA-H	novel_in_catalog	combination_of_known_splicesites	FALSE	32	147	0	0	28	0	0	0	0	0	0	31	0	0	0	9.01663	28.0908	0	0	19.9869	0	0	0	0	0	0	19.9622	0	0	0	4
480	PPP1R11	full-splice_match	alternative_5end	FALSE	17	35	6	23	0	0	0	0	0	30	20	7	43	19	0	4.79008	6.68829	1.10379	5.24792	0	0	0	0	0	14.8528	8.74642	4.50759	14.804	7.94537	0	9
486	POLR1H	full-splice_match	reference_match	FALSE	5	0	3	1	0	2	2	0	4	0	0	0	0	5	5	1.40885	0	0.551895	0.228171	0	1.96161	3.25289	0	2.21487	0	0	0	0	2.09089	2.25096	6
488	RPP21	full-splice_match	reference_match	FALSE	68	0	79	49	9	7	1	0	25	0	0	17	0	0	32	19.1603	0	14.5332	11.1804	6.42436	6.86563	1.62645	0	13.8429	0	0	10.947	0	0	14.4061	9
494	RPP21	full-splice_match	reference_match	FALSE	8	0	10	3	0	0	0	2	5	0	0	4	0	0	9	2.25416	0	1.83965	0.684512	0	0	0	4.27085	2.76858	0	0	2.57576	0	0	4.05173	6
495	RPP21	full-splice_match	reference_match	FALSE	7	0	7	3	3	2	1	2	0	0	0	3	0	0	9	1.97239	0	1.28775	0.684512	2.14145	1.96161	1.62645	4.27085	0	0	0	1.93182	0	0	4.05173	8
504	ABCF1	incomplete-splice_match	5prime_fragment	FALSE	7	7	14	4	4	3	1	1	4	2	7	5	3	4	2	1.97239	1.33766	2.57551	0.912682	2.85527	2.94241	1.62645	2.13542	2.21487	0.990186	3.06125	3.21971	1.03284	1.67271	0.900384	12
509	MRPS18B	full-splice_match	alternative_5end	FALSE	8	37	39	0	11	0	0	0	20	0	0	0	0	9	0	2.25416	7.07048	7.17463	0	7.85199	0	0	0	11.0743	0	0	0	0	3.76359	0	6
513	C6orf136	full-splice_match	alternative_3end	FALSE	14	13	18	0	1	0	7	0	0	20	34	0	36	9	0	3.94478	2.48422	3.31137	0	0.713818	0	11.3851	0	0	9.90186	14.8689	0	12.394	3.76359	0	8
517	novelGene_IER3_AS	antisense	multi-exon	FALSE	2	0	3	0	1	0	3	0	0	3	3	3	6	0	0	0.563539	0	0.551895	0	0.713818	0	4.87934	0	0	1.48528	1.31196	1.93182	2.06567	0	0	5
541	PPP1R10	incomplete-splice_match	5prime_fragment	FALSE	8	3	5	8	12	6	5	3	4	1	17	4	5	5	3	2.25416	0.573282	0.919825	1.82536	8.56581	5.88482	8.13224	6.40627	2.21487	0.495093	7.43445	2.57576	1.7214	2.09089	1.35058	12
545	FLOT1	full-splice_match	alternative_5end	FALSE	28	105	14	103	4	0	0	0	44	0	136	0	2	10	1	7.88955	20.0649	2.57551	23.5016	2.85527	0	0	0	24.3635	0	59.4756	0	0.688558	4.18177	0.450192	8
546	FLOT1	incomplete-splice_match	3prime_fragment	FALSE	2	0	0	1	0	0	0	17	4	5	13	2	15	5	0	0.563539	0	0	0.228171	0	0	0	36.3022	2.21487	2.47547	5.68517	1.28788	5.16419	2.09089	0	7
553	IER3	full-splice_match	mono-exon	FALSE	7	5	9	0	5	1	3	1	1	10	0	1	1	10	2	1.97239	0.95547	1.65568	0	3.56909	0.980804	4.87934	2.13542	0.553717	4.95093	0	0.643941	0.344279	4.18177	0.900384	7
555	POLR1HASP	full-splice_match	mono-exon	FALSE	3	6	7	9	6	0	1	1	11	9	4	1	4	8	5	0.845309	1.14656	1.28775	2.05354	4.28291	0	1.62645	2.13542	6.09088	4.45584	1.74928	0.643941	1.37712	3.34542	2.25096	12
560	DDX39B	incomplete-splice_match	3prime_fragment	FALSE	29	2	0	77	28	3	1	0	29	1	0	26	1	2	1	8.17132	0.382188	0	17.5691	19.9869	2.94241	1.62645	0	16.0578	0.495093	0	16.7425	0.344279	0.836354	0.450192	7
571	ATP6V1G2	full-splice_match	alternative_5end	FALSE	73	92	66	143	49	1	1	16	1	4	150	104	2	106	0	20.5692	17.5807	12.1417	32.6284	34.9771	0.980804	1.62645	34.1668	0.553717	1.98037	65.5981	66.9699	0.688558	44.3268	0	11
577	NFKBIL1	full-splice_match	reference_match	FALSE	5	12	2	0	0	9	0	0	2	1	0	0	1	0	0	1.40885	2.29313	0.36793	0	0	8.82723	0	0	1.10743	0.495093	0	0	0.344279	0	0	4
581	AIF1	full-splice_match	reference_match	FALSE	11	5	41	0	1	2	0	2	0	2	5	0	4	3	1	3.09947	0.95547	7.54256	0	0.713818	1.96161	0	4.27085	0	0.990186	2.1866	0	1.37712	1.25453	0.450192	7
588	PRRC2A	incomplete-splice_match	5prime_fragment	FALSE	2	1	1	0	2	2	1	1	2	1	2	1	0	2	1	0.563539	0.191094	0.183965	0	1.42764	1.96161	1.62645	2.13542	1.10743	0.495093	0.874642	0.643941	0	0.836354	0.450192	5
598	C6orf47	full-splice_match	mono-exon	FALSE	8	14	9	0	1	2	0	1	11	8	6	4	14	7	5	2.25416	2.67532	1.65568	0	0.713818	1.96161	0	2.13542	6.09088	3.96075	2.62392	2.57576	4.81991	2.92724	2.25096	12
602	CSNK2B	novel_in_catalog	combination_of_known_junctions,intron_retention	FALSE	31	2	2	2	0	7	0	0	0	3	0	2	10	10	0	8.73486	0.382188	0.36793	0.456341	0	6.86563	0	0	0	1.48528	0	1.28788	3.44279	4.18177	0	6
603	CSNK2B	full-splice_match	reference_match	FALSE	50	75	113	90	0	3	0	0	31	68	31	35	81	86	32	14.0885	14.3321	20.788	20.5354	0	2.94241	0	0	17.1652	33.6663	13.5569	22.5379	27.8866	35.9632	14.4061	12
610	ABHD16A	full-splice_match	alternative_5end	FALSE	2	62	44	0	0	0	0	0	4	0	48	0	0	52	0	0.563539	11.8478	8.09446	0	0	0	0	0	2.21487	0	20.9914	0	0	21.7452	0	5
615	CLIC1	full-splice_match	alternative_5end	FALSE	7	13	19	7	3	0	0	0	0	0	0	3	0	2	0	1.97239	2.48422	3.49533	1.59719	2.14145	0	0	0	0	0	0	1.93182	0	0.836354	0	6
619	LSM2	full-splice_match	reference_match	FALSE	44	102	87	44	11	0	3	1	22	21	15	12	19	28	23	12.3979	19.4916	16.0049	10.0395	7.85199	0	4.87934	2.13542	12.1818	10.397	6.55981	7.72729	6.5413	11.709	10.3544	14
623	HSPA1A	full-splice_match	mono-exon	FALSE	57	254	176	14	6	21	8	8	64	38	96	51	94	44	50	16.0609	48.5379	32.3778	3.19439	4.28291	20.5969	13.0116	17.0834	35.4379	18.8135	41.9828	32.841	32.3622	18.3998	22.5096	15
625	HSPA1B	full-splice_match	mono-exon	FALSE	52	225	106	95	14	18	1	6	55	38	45	29	35	391	271	14.652	42.9962	19.5003	21.6762	9.99345	17.6545	1.62645	12.8125	30.4544	18.8135	19.6794	18.6743	12.0498	163.507	122.002	15
627	SNHG32	full-splice_match	alternative_5end	FALSE	55	113	120	27	1	1	14	5	27	8	21	5	41	29	33	15.4973	21.5936	22.0758	6.16061	0.713818	0.980804	22.7703	10.6771	14.9503	3.96075	9.18374	3.21971	14.1154	12.1271	14.8563	13
629	SNHG32	full-splice_match	reference_match	FALSE	2	8	7	2	0	0	0	0	1	23	0	1	1	6	3	0.563539	1.52875	1.28775	0.456341	0	0	0	0	0.553717	11.3871	0	0.643941	0.344279	2.50906	1.35058	5
632	NEU1	full-splice_match	alternative_3end5end	FALSE	19	16	17	0	0	0	0	6	0	0	0	0	0	17	0	5.35362	3.05751	3.1274	0	0	0	0	12.8125	0	0	0	0	0	7.10901	0	5
633	NEU1	incomplete-splice_match	3prime_fragment	FALSE	1	0	1	0	0	5	8	0	0	0	0	11	21	0	0	0.28177	0	0.183965	0	0	4.90402	13.0116	0	0	0	0	7.08335	7.22986	0	0	4
639	NELFE	full-splice_match	alternative_3end5end	FALSE	18	33	32	7	0	0	0	0	0	0	0	0	4	13	0	5.07185	6.30611	5.88688	1.59719	0	0	0	0	0	0	0	0	1.37712	5.4363	0	6
641	NELFE	incomplete-splice_match	5prime_fragment	FALSE	7	8	13	5	2	1	0	0	3	1	2	1	4	5	2	1.97239	1.52875	2.39154	1.14085	1.42764	0.980804	0	0	1.66115	0.495093	0.874642	0.643941	1.37712	2.09089	0.900384	8
642	SKIC2	incomplete-splice_match	3prime_fragment	FALSE	6	0	0	18	1	0	0	0	0	0	0	0	8	0	18	1.69062	0	0	4.10707	0.713818	0	0	0	0	0	0	0	2.75423	0	8.10346	4
653	ATF6B	full-splice_match	reference_match	FALSE	14	10	12	8	17	14	0	7	9	3	20	0	0	3	15	3.94478	1.91094	2.20758	1.82536	12.1349	13.7313	0	14.948	4.98345	1.48528	8.74642	0	0	1.25453	6.75288	12
667	PSMB9	full-splice_match	reference_match	FALSE	13	22	32	10	0	0	1	0	2	0	1	0	0	3	0	3.66301	4.20407	5.88688	2.28171	0	0	1.62645	0	1.10743	0	0.437321	0	0	1.25453	0	7
673	HLA-DMA	full-splice_match	alternative_3end5end	FALSE	10	0	6	0	0	0	0	0	0	9	0	0	0	0	4	2.8177	0	1.10379	0	0	0	0	0	0	4.45584	0	0	0	0	1.80077	4
677	BRD2	incomplete-splice_match	3prime_fragment	FALSE	58	149	69	68	0	0	0	0	0	87	0	0	0	0	0	16.3426	28.473	12.6936	15.5156	0	0	0	0	0	43.0731	0	0	0	0	0	5
681	HLA-DPA1	incomplete-splice_match	3prime_fragment	FALSE	3	19	13	0	0	0	0	0	0	4	6	0	0	0	3	0.845309	3.63079	2.39154	0	0	0	0	0	0	1.98037	2.62392	0	0	0	1.35058	5
689	RING1	full-splice_match	reference_match	FALSE	16	43	0	0	29	2	0	0	0	43	8	0	0	32	0	4.50831	8.21705	0	0	20.7007	1.96161	0	0	0	21.289	3.49857	0	0	13.3817	0	7
691	RING1	incomplete-splice_match	5prime_fragment	FALSE	4	1	2	0	2	3	0	2	0	1	1	1	2	1	0	1.12708	0.191094	0.36793	0	1.42764	2.94241	0	4.27085	0	0.495093	0.437321	0.643941	0.688558	0.418177	0	4
698	RPS18	incomplete-splice_match	3prime_fragment	FALSE	10	33	16	30	1	1	0	1	10	9	6	6	1	10	7	2.8177	6.30611	2.94344	6.84512	0.713818	0.980804	0	2.13542	5.53717	4.45584	2.62392	3.86365	0.344279	4.18177	3.15134	11
700	RPS18	full-splice_match	reference_match	FALSE	914	1245	1237	519	59	73	50	60	388	203	389	249	409	519	384	257.537	237.912	227.565	118.421	42.1152	71.5987	81.3224	128.125	214.842	100.504	170.118	160.341	140.81	217.034	172.874	15
705	B3GALT4	full-splice_match	mono-exon	FALSE	12	13	14	12	3	2	4	5	15	7	3	5	14	1	2	3.38124	2.48422	2.57551	2.73805	2.14145	1.96161	6.50579	10.6771	8.30575	3.46565	1.31196	3.21971	4.81991	0.418177	0.900384	13
712	PFDN6	full-splice_match	alternative_5end	FALSE	59	41	64	13	1	4	4	2	13	6	3	16	6	16	9	16.6244	7.83486	11.7738	2.96622	0.713818	3.92321	6.50579	4.27085	7.19832	2.97056	1.31196	10.3031	2.06567	6.69083	4.05173	14
715	PFDN6	incomplete-splice_match	intron_retention	FALSE	1	0	0	0	6	0	0	0	0	0	6	0	4	0	8	0.28177	0	0	0	4.28291	0	0	0	0	0	2.62392	0	1.37712	0	3.60154	4
720	PFDN6	full-splice_match	alternative_3end	FALSE	26	9	34	11	13	1	0	0	6	2	4	0	13	8	2	7.32601	1.71985	6.25481	2.50988	9.27963	0.980804	0	0	3.3223	0.990186	1.74928	0	4.47563	3.34542	0.900384	9
721	PFDN6	full-splice_match	reference_match	FALSE	4	3	4	1	2	0	1	0	3	1	0	0	0	1	1	1.12708	0.573282	0.73586	0.228171	1.42764	0	1.62645	0	1.66115	0.495093	0	0	0	0.418177	0.450192	4
724	PFDN6	incomplete-splice_match	5prime_fragment	FALSE	4	4	2	1	0	2	0	0	3	5	3	2	4	0	3	1.12708	0.764376	0.36793	0.228171	0	1.96161	0	0	1.66115	2.47547	1.31196	1.28788	1.37712	0	1.35058	8
727	RGL2	incomplete-splice_match	3prime_fragment	FALSE	19	0	0	43	34	0	7	25	25	0	45	0	73	0	48	5.35362	0	0	9.81133	24.2698	0	11.3851	53.3856	13.8429	0	19.6794	0	25.1324	0	21.6092	9
732	DAXX	incomplete-splice_match	3prime_fragment	FALSE	6	37	0	0	13	0	0	0	0	0	24	0	21	4	20	1.69062	7.07048	0	0	9.27963	0	0	0	0	0	10.4957	0	7.22986	1.67271	9.00384	7
734	MOG	full-splice_match	alternative_3end5end	FALSE	38	69	114	2	4	4	0	2	15	2	0	7	4	4	4	10.7072	13.1855	20.972	0.456341	2.85527	3.92321	0	4.27085	8.30575	0.990186	0	4.50759	1.37712	1.67271	1.80077	11
735	MOG	novel_not_in_catalog	partial_intron_retention	FALSE	11	13	41	2	0	4	1	0	6	0	0	2	4	0	0	3.09947	2.48422	7.54256	0.456341	0	3.92321	1.62645	0	3.3223	0	0	1.28788	1.37712	0	0	8
737	MOG	novel_not_in_catalog	partial_intron_retention	FALSE	8	36	35	0	0	0	0	0	28	0	0	0	0	0	0	2.25416	6.87939	6.43877	0	0	0	0	0	15.5041	0	0	0	0	0	0	4
747	POLR1HASP	full-splice_match	mono-exon	FALSE	3	5	4	5	4	10	0	1	7	1	6	4	7	4	5	0.845309	0.95547	0.73586	1.14085	2.85527	9.80804	0	2.13542	3.87602	0.495093	2.62392	2.57576	2.40995	1.67271	2.25096	10
753	POLR1H	full-splice_match	alternative_5end	FALSE	2	1	1	0	3	1	1	1	0	3	7	3	0	1	0	0.563539	0.191094	0.183965	0	2.14145	0.980804	1.62645	2.13542	0	1.48528	3.06125	1.93182	0	0.418177	0	6
768	ABCF1	incomplete-splice_match	5prime_fragment	FALSE	7	16	17	7	8	7	2	3	4	4	10	8	5	7	5	1.97239	3.05751	3.1274	1.59719	5.71054	6.86563	3.25289	6.40627	2.21487	1.98037	4.37321	5.15153	1.7214	2.92724	2.25096	15
772	PPP1R10	incomplete-splice_match	5prime_fragment	FALSE	78	55	53	22	30	35	15	15	42	10	62	75	19	54	40	21.978	10.5102	9.75014	5.01975	21.4145	34.3281	24.3967	32.0314	23.2561	4.95093	27.1139	48.2956	6.5413	22.5816	18.0077	15
774	MRPS18B	full-splice_match	alternative_5end	FALSE	19	53	46	1	9	0	0	0	0	0	0	10	31	7	0	5.35362	10.128	8.46239	0.228171	6.42436	0	0	0	0	0	0	6.43941	10.6727	2.92724	0	7
776	C6orf136	full-splice_match	alternative_5end	FALSE	12	4	13	0	10	0	0	0	0	0	35	0	29	5	0	3.38124	0.764376	2.39154	0	7.13818	0	0	0	0	0	15.3062	0	9.98409	2.09089	0	6
777	TUBB	full-splice_match	alternative_3end5end	FALSE	11	124	56	5	38	1	0	0	0	128	104	0	157	41	0	3.09947	23.6957	10.302	1.14085	27.1251	0.980804	0	0	0	63.3719	45.4814	0	54.0518	17.1453	0	9
779	FLOT1	incomplete-splice_match	3prime_fragment	FALSE	4	0	0	13	37	0	0	0	0	94	0	0	13	1	0	1.12708	0	0	2.96622	26.4113	0	0	0	0	46.5388	0	0	4.47563	0.418177	0	5
781	FLOT1	full-splice_match	alternative_3end5end	FALSE	19	95	64	9	0	11	0	0	46	1	55	55	2	70	0	5.35362	18.1539	11.7738	2.05354	0	10.7888	0	0	25.471	0.495093	24.0526	35.4168	0.688558	29.2724	0	9
782	FLOT1	incomplete-splice_match	3prime_fragment	FALSE	1	2	9	97	0	2	22	2	0	0	16	0	0	7	7	0.28177	0.382188	1.65568	22.1325	0	1.96161	35.7818	4.27085	0	0	6.99713	0	0	2.92724	3.15134	8
785	IER3	full-splice_match	mono-exon	FALSE	7	7	3	7	5	1	2	0	1	2	12	6	21	1	2	1.97239	1.33766	0.551895	1.59719	3.56909	0.980804	3.25289	0	0.553717	0.990186	5.24785	3.86365	7.22986	0.418177	0.900384	8
791	DDR1	incomplete-splice_match	3prime_fragment	FALSE	24	0	0	9	36	0	0	0	0	0	0	0	0	11	0	6.76247	0	0	2.05354	25.6974	0	0	0	0	0	0	0	0	4.59995	0	4
792	DDR1	incomplete-splice_match	3prime_fragment	FALSE	1	1	1	0	0	0	0	19	0	0	27	66	0	0	97	0.28177	0.191094	0.183965	0	0	0	0	40.5731	0	0	11.8077	42.5001	0	0	43.6686	4
805	NFKBIL1	full-splice_match	reference_match	FALSE	5	3	2	0	0	1	0	0	12	12	0	7	0	15	11	1.40885	0.573282	0.36793	0	0	0.980804	0	0	6.6446	5.94112	0	4.50759	0	6.27266	4.95211	6
817	CSNK2B	full-splice_match	reference_match	FALSE	58	101	97	75	0	0	0	0	39	8	25	38	28	91	28	16.3426	19.3005	17.8446	17.1128	0	0	0	0	21.5949	3.96075	10.933	24.4698	9.63982	38.0541	12.6054	11
821	CSNK2B	novel_in_catalog	combination_of_known_junctions,intron_retention	FALSE	1	4	1	0	0	6	0	0	3	46	0	3	62	1	0	0.28177	0.764376	0.183965	0	0	5.88482	0	0	1.66115	22.7743	0	1.93182	21.3453	0.418177	0	5
834	DDX39B	full-splice_match	alternative_5end	FALSE	37	80	13	0	0	0	0	0	0	0	65	0	2	0	0	10.4255	15.2875	2.39154	0	0	0	0	0	0	0	28.4259	0	0.688558	0	0	4
839	ATP6V1G2	full-splice_match	reference_match	FALSE	60	88	67	104	30	0	28	0	3	0	115	73	2	90	117	16.9062	16.8163	12.3256	23.7297	21.4145	0	45.5405	0	1.66115	0	50.2919	47.0077	0.688558	37.6359	52.6725	11
851	C6orf47	full-splice_match	mono-exon	FALSE	8	7	15	20	2	3	0	0	6	10	4	4	15	5	4	2.25416	1.33766	2.75947	4.56341	1.42764	2.94241	0	0	3.3223	4.95093	1.74928	2.57576	5.16419	2.09089	1.80077	13
855	CLIC1	full-splice_match	alternative_5end	FALSE	4	6	10	6	3	0	0	0	0	0	3	0	0	0	3	1.12708	1.14656	1.83965	1.36902	2.14145	0	0	0	0	0	1.31196	0	0	0	1.35058	7
869	PSMB9	full-splice_match	reference_match	FALSE	9	20	12	2	0	0	0	0	0	0	0	1	1	3	1	2.53593	3.82188	2.20758	0.456341	0	0	0	0	0	0	0	0.643941	0.344279	1.25453	0.450192	4
878	BRD2	incomplete-splice_match	internal_fragment	FALSE	8	10	14	14	0	0	6	0	7	0	6	5	0	6	0	2.25416	1.91094	2.57551	3.19439	0	0	9.75868	0	3.87602	0	2.62392	3.21971	0	2.50906	0	9
879	BRD2	full-splice_match	alternative_3end	FALSE	2	2	0	0	9	0	0	2	0	6	1	0	1	0	7	0.563539	0.382188	0	0	6.42436	0	0	4.27085	0	2.97056	0.437321	0	0.344279	0	3.15134	4
884	SLC39A7	incomplete-splice_match	5prime_fragment	FALSE	4	11	10	9	0	0	0	0	0	0	0	0	2	0	1	1.12708	2.10204	1.83965	2.05354	0	0	0	0	0	0	0	0	0.688558	0	0.450192	4
888	RING1	incomplete-splice_match	5prime_fragment	FALSE	1	1	1	0	1	3	1	2	2	0	1	2	4	2	1	0.28177	0.191094	0.183965	0	0.713818	2.94241	1.62645	4.27085	1.10743	0	0.437321	1.28788	1.37712	0.836354	0.450192	6
891	RING1	incomplete-splice_match	3prime_fragment	FALSE	20	0	0	34	49	5	14	0	0	0	52	2	75	43	48	5.63539	0	0	7.7578	34.9771	4.90402	22.7703	0	0	0	22.7407	1.28788	25.8209	17.9816	21.6092	10
892	VPS52	incomplete-splice_match	3prime_fragment	FALSE	22	0	3	0	0	0	0	0	0	33	0	1	34	16	0	6.19893	0	0.551895	0	0	0	0	0	0	16.3381	0	0.643941	11.7055	6.69083	0	4
893	TRIM27	full-splice_match	mono-exon	FALSE	15	25	19	42	11	4	11	2	21	25	17	17	25	27	16	4.22655	4.77735	3.49533	9.58316	7.85199	3.92321	17.8909	4.27085	11.628	12.3773	7.43445	10.947	8.60698	11.2908	7.20307	15
894	TRIM27	incomplete-splice_match	5prime_fragment	FALSE	1	3	3	0	0	4	0	1	2	3	1	5	0	0	1	0.28177	0.573282	0.551895	0	0	3.92321	0	2.13542	1.10743	1.48528	0.437321	3.21971	0	0	0.450192	5
904	MOG	full-splice_match	alternative_5end	FALSE	27	51	84	8	2	5	1	1	18	0	0	9	1	6	1	7.60778	9.7458	15.4531	1.82536	1.42764	4.90402	1.62645	2.13542	9.9669	0	0	5.79547	0.344279	2.50906	0.450192	11
918	HLA-A	incomplete-splice_match	3prime_fragment	FALSE	78	0	0	0	0	13	0	0	0	84	27	0	0	0	43	21.978	0	0	0	0	12.7504	0	0	0	41.5878	11.8077	0	0	0	19.3583	5
922	HLA-A	incomplete-splice_match	3prime_fragment	FALSE	1	4	0	0	2	10	1	0	1	1	0	25	0	1	0	0.28177	0.764376	0	0	1.42764	9.80804	1.62645	0	0.553717	0.495093	0	16.0985	0	0.418177	0	4
928	POLR1H	full-splice_match	reference_match	FALSE	7	9	0	3	0	0	0	0	4	4	0	2	0	3	0	1.97239	1.71985	0	0.684512	0	0	0	0	2.21487	1.98037	0	1.28788	0	1.25453	0	6
933	POLR1HASP	full-splice_match	mono-exon	FALSE	7	4	7	6	11	3	2	1	4	8	5	2	2	3	6	1.97239	0.764376	1.28775	1.36902	7.85199	2.94241	3.25289	2.13542	2.21487	3.96075	2.1866	1.28788	0.688558	1.25453	2.70115	13
941	ABCF1	incomplete-splice_match	5prime_fragment	FALSE	19	21	23	14	12	2	2	4	3	6	12	10	10	7	4	5.35362	4.01298	4.23119	3.19439	8.56581	1.96161	3.25289	8.5417	1.66115	2.97056	5.24785	6.43941	3.44279	2.92724	1.80077	15
942	ABCF1	incomplete-splice_match	5prime_fragment	FALSE	2	9	6	0	0	0	2	0	2	0	7	0	3	0	0	0.563539	1.71985	1.10379	0	0	0	3.25289	0	1.10743	0	3.06125	0	1.03284	0	0	6
945	MRPS18B	full-splice_match	alternative_5end	FALSE	8	39	26	34	0	0	1	0	0	0	0	0	0	6	0	2.25416	7.45267	4.78309	7.7578	0	0	1.62645	0	0	0	0	0	0	2.50906	0	6
950	C6orf136	full-splice_match	reference_match	FALSE	3	25	25	0	0	0	0	0	0	0	0	0	26	19	0	0.845309	4.77735	4.59912	0	0	0	0	0	0	0	0	0	8.95126	7.94537	0	4
956	NFKBIL1	incomplete-splice_match	3prime_fragment	FALSE	9	14	0	0	0	0	0	0	0	0	8	0	0	10	0	2.53593	2.67532	0	0	0	0	0	0	0	0	3.49857	0	0	4.18177	0	4
957	AIF1	full-splice_match	reference_match	FALSE	8	6	30	0	1	0	0	0	0	0	3	0	3	3	1	2.25416	1.14656	5.51895	0	0.713818	0	0	0	0	0	1.31196	0	1.03284	1.25453	0.450192	6
965	PRRC2A	incomplete-splice_match	3prime_fragment	FALSE	30	5	1	0	0	33	0	0	0	108	57	0	153	50	34	8.45309	0.95547	0.183965	0	0	32.3665	0	0	0	53.4701	24.9273	0	52.6747	20.9089	15.3065	7
981	STK19B	incomplete-splice_match	3prime_fragment	FALSE	2	0	0	0	18	11	3	0	0	0	11	0	8	9	0	0.563539	0	0	0	12.8487	10.7888	4.87934	0	0	0	4.81053	0	2.75423	3.76359	0	6
984	EGFL8	incomplete-splice_match	3prime_fragment	FALSE	7	1	8	15	9	0	2	3	0	7	11	9	3	6	0	1.97239	0.191094	1.47172	3.42256	6.42436	0	3.25289	6.40627	0	3.46565	4.81053	5.79547	1.03284	2.50906	0	11
988	GNL1	incomplete-splice_match	3prime_fragment	FALSE	2	0	0	0	0	6	0	0	10	0	0	0	0	8	12	0.563539	0	0	0	0	5.88482	0	0	5.53717	0	0	0	0	3.34542	5.40231	4
991	PPP1R10	incomplete-splice_match	5prime_fragment	FALSE	49	31	38	19	27	12	11	15	19	20	54	41	25	22	26	13.8067	5.92392	6.99067	4.33524	19.2731	11.7696	17.8909	32.0314	10.5206	9.90186	23.6153	26.4016	8.60698	9.1999	11.705	15
996	PPP1R18	full-splice_match	alternative_5end	FALSE	4	16	9	0	0	0	0	0	0	3	0	0	0	0	0	1.12708	3.05751	1.65568	0	0	0	0	0	0	1.48528	0	0	0	0	0	4
997	MDC1	incomplete-splice_match	3prime_fragment	FALSE	2	0	0	25	7	3	0	0	14	0	0	1	1	0	0	0.563539	0	0	5.70426	4.99672	2.94241	0	0	7.75203	0	0	0.643941	0.344279	0	0	4
1002	DDAH2	full-splice_match	alternative_5end	FALSE	6	0	6	0	0	0	0	0	1	1	6	0	0	6	3	1.69062	0	1.10379	0	0	0	0	0	0.553717	0.495093	2.62392	0	0	2.50906	1.35058	5
1004	CLIC1	full-splice_match	alternative_5end	FALSE	3	17	15	3	0	0	0	0	2	0	3	0	0	3	0	0.845309	3.2486	2.75947	0.684512	0	0	0	0	1.10743	0	1.31196	0	0	1.25453	0	5
1008	LSM2	full-splice_match	reference_match	FALSE	47	97	105	20	16	10	0	0	20	13	8	13	17	16	20	13.2432	18.5361	19.3163	4.56341	11.4211	9.80804	0	0	11.0743	6.43621	3.49857	8.37123	5.85274	6.69083	9.00384	13
1011	NEU1	full-splice_match	alternative_3end5end	FALSE	15	14	2	0	6	0	0	0	0	0	0	13	0	0	0	4.22655	2.67532	0.36793	0	4.28291	0	0	0	0	0	0	8.37123	0	0	0	4
1014	EHMT2	incomplete-splice_match	intron_retention	FALSE	1	0	0	1	11	0	7	0	0	0	29	23	0	2	0	0.28177	0	0	0.228171	7.85199	0	11.3851	0	0	0	12.6823	14.8106	0	0.836354	0	4
1018	NELFE	full-splice_match	alternative_3end5end	FALSE	14	4	9	12	0	0	0	0	0	7	0	0	6	0	0	3.94478	0.764376	1.65568	2.73805	0	0	0	0	0	3.46565	0	0	2.06567	0	0	5
1021	NELFE	incomplete-splice_match	5prime_fragment	FALSE	28	17	26	13	2	2	2	1	7	4	8	7	5	8	5	7.88955	3.2486	4.78309	2.96622	1.42764	1.96161	3.25289	2.13542	3.87602	1.98037	3.49857	4.50759	1.7214	3.34542	2.25096	15
1031	HLA-C	full-splice_match	reference_match	FALSE	108	217	2	0	0	5	0	0	0	0	13	23	0	0	60	30.4311	41.4674	0.36793	0	0	4.90402	0	0	0	0	5.68517	14.8106	0	0	27.0115	6
1041	DDX39B	incomplete-splice_match	3prime_fragment	FALSE	2	3	2	1	7	18	0	0	3	0	0	24	1	3	2	0.563539	0.573282	0.36793	0.228171	4.99672	17.6545	0	0	1.66115	0	0	15.4546	0.344279	1.25453	0.900384	5
1047	ATP6V1G2	full-splice_match	alternative_5end	FALSE	62	127	53	169	1	0	27	19	0	1	150	96	6	103	145	17.4697	24.269	9.75014	38.5608	0.713818	0	43.9141	40.5731	0	0.495093	65.5981	61.8183	2.06567	43.0722	65.2779	11
1054	C6orf47	full-splice_match	mono-exon	FALSE	6	6	11	11	2	2	1	0	6	4	4	8	18	4	2	1.69062	1.14656	2.02361	2.50988	1.42764	1.96161	1.62645	0	3.3223	1.98037	1.74928	5.15153	6.19702	1.67271	0.900384	13
1055	ABHD16A	full-splice_match	alternative_5end	FALSE	5	58	16	0	0	0	0	0	0	32	36	0	0	36	1	1.40885	11.0835	2.94344	0	0	0	0	0	0	15.843	15.7435	0	0	15.0544	0.450192	6
1063	PSMB8	full-splice_match	reference_match	FALSE	9	12	25	0	0	0	0	0	0	1	0	0	9	5	0	2.53593	2.29313	4.59912	0	0	0	0	0	0	0.495093	0	0	3.09851	2.09089	0	5
1068	BRD2	incomplete-splice_match	3prime_fragment	FALSE	5	15	17	21	0	0	4	5	7	0	4	8	17	10	0	1.40885	2.86641	3.1274	4.79158	0	0	6.50579	10.6771	3.87602	0	1.74928	5.15153	5.85274	4.18177	0	11
1069	HLA-DPA1	incomplete-splice_match	3prime_fragment	FALSE	8	19	26	0	0	0	0	0	0	5	0	0	12	0	6	2.25416	3.63079	4.78309	0	0	0	0	0	0	2.47547	0	0	4.13135	0	2.70115	6
1072	SLC39A7	full-splice_match	alternative_5end	FALSE	21	39	34	0	0	0	0	0	0	0	0	0	0	31	0	5.91716	7.45267	6.25481	0	0	0	0	0	0	0	0	0	0	12.9635	0	4
1077	RING1	incomplete-splice_match	5prime_fragment	FALSE	1	1	4	1	0	2	0	0	2	0	1	0	5	2	3	0.28177	0.191094	0.73586	0.228171	0	1.96161	0	0	1.10743	0	0.437321	0	1.7214	0.836354	1.35058	4
1081	VPS52	incomplete-splice_match	3prime_fragment	FALSE	25	0	0	57	0	0	10	0	0	0	0	0	0	20	2	7.04424	0	0	13.0057	0	0	16.2645	0	0	0	0	0	0	8.36354	0.900384	4
1082	RPS18	full-splice_match	reference_match	FALSE	298	414	1033	287	35	38	19	19	133	116	218	168	210	208	183	83.9674	79.113	190.036	65.485	24.9836	37.2705	30.9025	40.5731	73.6443	57.4308	95.3359	108.182	72.2986	86.9808	82.3852	15
1083	RPS18	incomplete-splice_match	3prime_fragment	FALSE	6	13	13	7	0	0	0	0	2	3	1	2	2	7	1	1.69062	2.48422	2.39154	1.59719	0	0	0	0	1.10743	1.48528	0.437321	1.28788	0.688558	2.92724	0.450192	8
1085	RPS18	incomplete-splice_match	5prime_fragment	FALSE	15	0	25	11	3	3	1	0	3	3	11	4	9	6	4	4.22655	0	4.59912	2.50988	2.14145	2.94241	1.62645	0	1.66115	1.48528	4.81053	2.57576	3.09851	2.50906	1.80077	13
1087	RPS18	full-splice_match	reference_match	FALSE	4	10	6	1	0	0	0	0	1	0	1	1	0	7	4	1.12708	1.91094	1.10379	0.228171	0	0	0	0	0.553717	0	0.437321	0.643941	0	2.92724	1.80077	5
1090	B3GALT4	full-splice_match	mono-exon	FALSE	13	21	16	14	4	2	0	0	9	9	3	4	10	8	5	3.66301	4.01298	2.94344	3.19439	2.85527	1.96161	0	0	4.98345	4.45584	1.31196	2.57576	3.44279	3.34542	2.25096	13
1091	WDR46	incomplete-splice_match	3prime_fragment	FALSE	15	0	0	0	1	15	8	0	0	0	0	0	0	0	38	4.22655	0	0	0	0.713818	14.7121	13.0116	0	0	0	0	0	0	0	17.1073	4
1093	PFDN6	full-splice_match	reference_match	FALSE	23	13	6	1	1	1	0	0	3	0	13	13	1	6	2	6.4807	2.48422	1.10379	0.228171	0.713818	0.980804	0	0	1.66115	0	5.68517	8.37123	0.344279	2.50906	0.900384	7
1097	PFDN6	full-splice_match	reference_match	FALSE	9	2	6	4	0	2	0	0	2	2	1	3	2	3	1	2.53593	0.382188	1.10379	0.912682	0	1.96161	0	0	1.10743	0.990186	0.437321	1.93182	0.688558	1.25453	0.450192	6
1099	PFDN6	full-splice_match	alternative_5end	FALSE	41	31	81	18	5	2	5	0	28	32	4	7	16	25	18	11.5526	5.92392	14.9012	4.10707	3.56909	1.96161	8.13224	0	15.5041	15.843	1.74928	4.50759	5.50847	10.4544	8.10346	14
1101	PFDN6	incomplete-splice_match	5prime_fragment	FALSE	4	0	3	0	0	2	0	0	2	0	0	2	1	0	0	1.12708	0	0.551895	0	0	1.96161	0	0	1.10743	0	0	1.28788	0.344279	0	0	4
1104	PFDN6	novel_not_in_catalog	Alt3	FALSE	5	0	10	0	0	0	0	4	0	0	0	2	0	1	0	1.40885	0	1.83965	0	0	0	0	8.5417	0	0	0	1.28788	0	0.418177	0	4
1110	DAXX	incomplete-splice_match	3prime_fragment	FALSE	4	0	0	58	0	5	5	0	40	13	15	28	0	0	10	1.12708	0	0	13.2339	0	4.90402	8.13224	0	22.1487	6.43621	6.55981	18.0304	0	0	4.50192	9
1127	MOG	full-splice_match	alternative_3end	FALSE	7	28	61	6	0	4	0	1	6	2	2	4	3	1	1	1.97239	5.35063	11.2219	1.36902	0	3.92321	0	2.13542	3.3223	0.990186	0.874642	2.57576	1.03284	0.418177	0.450192	9
1128	MOG	novel_not_in_catalog	Alt5	FALSE	1	16	33	0	0	1	0	0	3	0	0	0	0	39	0	0.28177	3.05751	6.07084	0	0	0.980804	0	0	1.66115	0	0	0	0	16.3089	0	4
1129	MOG	novel_not_in_catalog	Alt5	FALSE	10	30	28	0	0	1	0	0	1	0	0	2	0	4	1	2.8177	5.73282	5.15102	0	0	0.980804	0	0	0.553717	0	0	1.28788	0	1.67271	0.450192	5
1132	MOG	incomplete-splice_match	intron_retention	FALSE	8	1	5	3	0	15	0	0	4	0	0	2	1	0	1	2.25416	0.191094	0.919825	0.684512	0	14.7121	0	0	2.21487	0	0	1.28788	0.344279	0	0.450192	4
1133	MOG	novel_not_in_catalog	Alt5	FALSE	4	2	17	0	0	0	0	1	9	0	0	0	0	0	0	1.12708	0.382188	3.1274	0	0	0	0	2.13542	4.98345	0	0	0	0	0	0	4
1137	RPP21	full-splice_match	reference_match	FALSE	81	0	88	57	12	5	3	5	32	0	0	7	0	0	24	22.8233	0	16.1889	13.0057	8.56581	4.90402	4.87934	10.6771	17.7189	0	0	4.50759	0	0	10.8046	10
1140	RPP21	full-splice_match	reference_match	FALSE	10	0	5	7	1	2	1	2	5	0	0	10	0	0	24	2.8177	0	0.919825	1.59719	0.713818	1.96161	1.62645	4.27085	2.76858	0	0	6.43941	0	0	10.8046	8
1142	RPP21	full-splice_match	reference_match	FALSE	9	0	16	4	6	3	0	0	1	0	0	5	0	0	1	2.53593	0	2.94344	0.912682	4.28291	2.94241	0	0	0.553717	0	0	3.21971	0	0	0.450192	5
1155	ABCF1	full-splice_match	alternative_3end5end	FALSE	9	0	0	17	0	0	0	0	5	0	0	0	0	9	0	2.53593	0	0	3.8789	0	0	0	0	2.76858	0	0	0	0	3.76359	0	4
1157	MRPS18B	full-splice_match	alternative_5end	FALSE	19	29	34	2	0	0	0	0	0	0	0	0	0	13	0	5.35362	5.54173	6.25481	0.456341	0	0	0	0	0	0	0	0	0	5.4363	0	4
1159	ABCF1	incomplete-splice_match	5prime_fragment	FALSE	3	0	10	0	1	0	1	0	0	0	0	3	3	2	0	0.845309	0	1.83965	0	0.713818	0	1.62645	0	0	0	0	1.93182	1.03284	0.836354	0	4
1163	C6orf136	full-splice_match	alternative_3end	FALSE	15	18	28	41	0	0	0	0	0	0	11	30	33	9	0	4.22655	3.43969	5.15102	9.35499	0	0	0	0	0	0	4.81053	19.3182	11.3612	3.76359	0	8
1165	ABCF1	incomplete-splice_match	5prime_fragment	FALSE	3	8	7	2	0	3	1	1	1	2	2	2	4	4	4	0.845309	1.52875	1.28775	0.456341	0	2.94241	1.62645	2.13542	0.553717	0.990186	0.874642	1.28788	1.37712	1.67271	1.80077	9
1167	TUBB	full-splice_match	alternative_3end5end	FALSE	576	707	332	2	1	52	0	48	0	3	571	0	0	219	701	162.299	135.104	61.0764	0.456341	0.713818	51.0018	0	102.5	0	1.48528	249.71	0	0	91.5808	315.585	9
1168	novelGene_IER3_AS	antisense	multi-exon	FALSE	11	8	14	0	0	0	0	0	1	0	0	0	0	4	7	3.09947	1.52875	2.57551	0	0	0	0	0	0.553717	0	0	0	0	1.67271	3.15134	5
1172	DDR1	incomplete-splice_match	3prime_fragment	FALSE	1	1	0	146	11	43	0	0	216	0	0	0	0	0	0	0.28177	0.191094	0	33.3129	7.85199	42.1746	0	0	119.603	0	0	0	0	0	0	4
1179	VARS2	incomplete-splice_match	3prime_fragment	FALSE	7	0	1	0	15	0	2	6	0	0	0	8	0	0	0	1.97239	0	0.183965	0	10.7073	0	3.25289	12.8125	0	0	0	5.15153	0	0	0	5
1187	PPP1R10	incomplete-splice_match	5prime_fragment	FALSE	21	17	13	13	14	12	8	8	12	9	15	18	10	18	12	5.91716	3.2486	2.39154	2.96622	9.99345	11.7696	13.0116	17.0834	6.6446	4.45584	6.55981	11.5909	3.44279	7.52719	5.40231	15
1195	FLOT1	incomplete-splice_match	3prime_fragment	FALSE	1	12	0	3	0	21	0	0	0	85	2	43	1	1	0	0.28177	2.29313	0	0.684512	0	20.5969	0	0	0	42.0829	0.874642	27.6895	0.344279	0.418177	0	4
1200	FLOT1	incomplete-splice_match	5prime_fragment	FALSE	4	28	15	16	9	9	2	1	1	5	3	0	0	5	2	1.12708	5.35063	2.75947	3.65073	6.42436	8.82723	3.25289	2.13542	0.553717	2.47547	1.31196	0	0	2.09089	0.900384	11
1203	IER3	full-splice_match	mono-exon	FALSE	20	13	4	6	2	1	2	1	2	3	14	2	12	31	14	5.63539	2.48422	0.73586	1.36902	1.42764	0.980804	3.25289	2.13542	1.10743	1.48528	6.12249	1.28788	4.13135	12.9635	6.30269	13
1210	AIF1	full-splice_match	alternative_5end	FALSE	9	7	68	7	1	1	0	0	0	0	4	1	3	3	3	2.53593	1.33766	12.5096	1.59719	0.713818	0.980804	0	0	0	0	1.74928	0.643941	1.03284	1.25453	1.35058	8
1224	DDX39B	full-splice_match	alternative_5end	FALSE	37	30	3	38	0	0	0	0	0	36	0	0	0	0	0	10.4255	5.73282	0.551895	8.67048	0	0	0	0	0	17.8234	0	0	0	0	0	4
1229	DDX39B	incomplete-splice_match	5prime_fragment	FALSE	2	3	1	1	1	2	0	2	1	0	0	2	0	6	1	0.563539	0.573282	0.183965	0.228171	0.713818	1.96161	0	4.27085	0.553717	0	0	1.28788	0	2.50906	0.450192	4
1232	DDX39B	incomplete-splice_match	3prime_fragment	FALSE	1	1	2	0	30	0	0	0	0	1	19	32	54	4	0	0.28177	0.191094	0.36793	0	21.4145	0	0	0	0	0.495093	8.30909	20.6061	18.5911	1.67271	0	5
1235	ATP6V1G2	full-splice_match	reference_match	FALSE	56	84	53	112	34	2	0	1	2	0	111	65	5	79	8	15.7791	16.0519	9.75014	25.5551	24.2698	1.96161	0	2.13542	1.10743	0	48.5426	41.8562	1.7214	33.036	3.60154	13
1240	C6orf47	full-splice_match	mono-exon	FALSE	4	11	9	14	1	1	0	0	2	1	4	2	12	2	7	1.12708	2.10204	1.65568	3.19439	0.713818	0.980804	0	0	1.10743	0.495093	1.74928	1.28788	4.13135	0.836354	3.15134	9
1243	CSNK2B	full-splice_match	reference_match	FALSE	128	182	0	173	21	0	28	13	0	0	76	0	0	1	0	36.0665	34.7791	0	39.4735	14.9902	0	45.5405	27.7605	0	0	33.2364	0	0	0.418177	0	7
1248	DDAH2	full-splice_match	alternative_5end	FALSE	7	13	19	0	4	1	0	0	2	0	4	5	9	0	0	1.97239	2.48422	3.49533	0	2.85527	0.980804	0	0	1.10743	0	1.74928	3.21971	3.09851	0	0	8
1249	CLIC1	full-splice_match	alternative_5end	FALSE	3	9	0	0	4	0	0	0	0	0	5	1	3	0	0	0.845309	1.71985	0	0	2.85527	0	0	0	0	0	2.1866	0.643941	1.03284	0	0	4
1251	LSM2	full-splice_match	reference_match	FALSE	52	72	85	59	7	6	0	0	19	9	7	9	20	26	16	14.652	13.7588	15.637	13.4621	4.99672	5.88482	0	0	10.5206	4.45584	3.06125	5.79547	6.88558	10.8726	7.20307	13
1254	HSPA1A	full-splice_match	mono-exon	FALSE	161	83	122	399	129	45	1	73	117	16	122	58	236	31	228	45.3649	15.8608	22.4437	91.0401	92.0825	44.1362	1.62645	155.886	64.7848	7.92149	53.3531	37.3486	81.2499	12.9635	102.644	15
1255	HSPA1B	full-splice_match	mono-exon	FALSE	59	184	9	77	28	6	9	8	3	8	30	16	20	274	17	16.6244	35.1613	1.65568	17.5691	19.9869	5.88482	14.638	17.0834	1.66115	3.96075	13.1196	10.3031	6.88558	114.581	7.65327	15
1257	SNHG32	full-splice_match	reference_match	FALSE	10	14	11	6	8	0	0	0	24	2	2	2	4	4	1	2.8177	2.67532	2.02361	1.36902	5.71054	0	0	0	13.2892	0.990186	0.874642	1.28788	1.37712	1.67271	0.450192	9
1258	SNHG32	full-splice_match	alternative_5end	FALSE	48	168	89	35	0	12	0	4	16	33	20	18	12	20	13	13.5249	32.1038	16.3729	7.98597	0	11.7696	0	8.5417	8.85947	16.3381	8.74642	11.5909	4.13135	8.36354	5.8525	13
1261	SNHG32	full-splice_match	alternative_5end	FALSE	2	1	5	3	0	0	4	1	3	1	0	0	3	1	3	0.563539	0.191094	0.919825	0.684512	0	0	6.50579	2.13542	1.66115	0.495093	0	0	1.03284	0.418177	1.35058	5
1285	NELFE	full-splice_match	alternative_3end5end	FALSE	15	8	17	41	0	0	0	0	0	0	0	4	0	0	0	4.22655	1.52875	3.1274	9.35499	0	0	0	0	0	0	0	2.57576	0	0	0	5
1289	NELFE	incomplete-splice_match	5prime_fragment	FALSE	23	25	24	12	1	4	0	0	5	4	6	4	5	13	6	6.4807	4.77735	4.41516	2.73805	0.713818	3.92321	0	0	2.76858	1.98037	2.62392	2.57576	1.7214	5.4363	2.70115	12
1306	HLA-DRB1	full-splice_match	reference_match	FALSE	70	0	107	47	1	7	0	2	0	21	0	0	61	6	0	19.7239	0	19.6842	10.724	0.713818	6.86563	0	4.27085	0	10.397	0	0	21.001	2.50906	0	8
1309	PSMB9	full-splice_match	reference_match	FALSE	3	6	21	8	0	0	0	0	3	0	0	0	2	3	0	0.845309	1.14656	3.86326	1.82536	0	0	0	0	1.66115	0	0	0	0.688558	1.25453	0	5
1312	BRD2	full-splice_match	alternative_3end5end	FALSE	3	81	2	0	5	0	1	0	85	3	6	53	0	0	0	0.845309	15.4786	0.36793	0	3.56909	0	1.62645	0	47.0659	1.48528	2.62392	34.1289	0	0	0	7
1331	RING1	incomplete-splice_match	5prime_fragment	FALSE	7	3	2	0	2	3	1	0	0	0	0	2	2	1	2	1.97239	0.573282	0.36793	0	1.42764	2.94241	1.62645	0	0	0	0	1.28788	0.688558	0.418177	0.900384	5
1334	RING1	incomplete-splice_match	3prime_fragment	FALSE	23	13	0	9	6	28	0	12	29	39	8	0	2	9	49	6.4807	2.48422	0	2.05354	4.28291	27.4625	0	25.6251	16.0578	19.3086	3.49857	0	0.688558	3.76359	22.0594	11
1336	RPS18	full-splice_match	reference_match	FALSE	893	1300	795	526	57	88	41	56	406	283	412	215	448	488	362	251.62	248.422	146.252	120.018	40.6876	86.3107	66.6843	119.584	224.809	140.111	180.176	138.447	154.237	204.07	162.97	15
1337	RPS18	incomplete-splice_match	3prime_fragment	FALSE	10	17	18	7	1	1	2	0	12	4	4	3	7	13	3	2.8177	3.2486	3.31137	1.59719	0.713818	0.980804	3.25289	0	6.6446	1.98037	1.74928	1.93182	2.40995	5.4363	1.35058	12
1339	RPS18	incomplete-splice_match	5prime_fragment	FALSE	17	10	8	12	3	0	0	3	10	5	12	5	4	11	6	4.79008	1.91094	1.47172	2.73805	2.14145	0	0	6.40627	5.53717	2.47547	5.24785	3.21971	1.37712	4.59995	2.70115	13
1343	WDR46	incomplete-splice_match	intron_retention	FALSE	1	0	17	0	3	11	2	14	0	0	0	0	2	0	0	0.28177	0	3.1274	0	2.14145	10.7888	3.25289	29.8959	0	0	0	0	0.688558	0	0	5
1344	PFDN6	incomplete-splice_match	5prime_fragment	FALSE	5	1	1	3	0	1	0	1	0	2	0	2	1	4	0	1.40885	0.191094	0.183965	0.684512	0	0.980804	0	2.13542	0	0.990186	0	1.28788	0.344279	1.67271	0	4
1349	PFDN6	full-splice_match	alternative_5end	FALSE	45	46	57	9	1	1	0	0	24	26	16	3	31	26	3	12.6796	8.79033	10.486	2.05354	0.713818	0.980804	0	0	13.2892	12.8724	6.99713	1.93182	10.6727	10.8726	1.35058	11
1350	PFDN6	full-splice_match	reference_match	FALSE	2	3	3	2	4	1	1	3	2	1	2	1	1	2	0	0.563539	0.573282	0.551895	0.456341	2.85527	0.980804	1.62645	6.40627	1.10743	0.495093	0.874642	0.643941	0.344279	0.836354	0	4
1351	PFDN6	full-splice_match	reference_match	FALSE	20	16	26	8	5	2	2	0	5	4	2	3	8	10	5	5.63539	3.05751	4.78309	1.82536	3.56909	1.96161	3.25289	0	2.76858	1.98037	0.874642	1.93182	2.75423	4.18177	2.25096	13
1352	PFDN6	novel_not_in_catalog	Alt3	FALSE	5	4	8	6	0	2	0	0	0	1	1	11	2	0	0	1.40885	0.764376	1.47172	1.36902	0	1.96161	0	0	0	0.495093	0.437321	7.08335	0.688558	0	0	5
1354	PFDN6	incomplete-splice_match	intron_retention	FALSE	7	1	0	0	8	0	1	0	0	0	0	0	0	0	14	1.97239	0.191094	0	0	5.71054	0	1.62645	0	0	0	0	0	0	0	6.30269	4
1368	MOG	full-splice_match	alternative_3end5end	FALSE	24	48	15	1	2	4	0	0	5	0	1	4	0	4	4	6.76247	9.17252	2.75947	0.228171	1.42764	3.92321	0	0	2.76858	0	0.437321	2.57576	0	1.67271	1.80077	9
1369	MOG	novel_not_in_catalog	partial_intron_retention	FALSE	19	13	13	8	0	11	0	0	1	0	0	0	0	0	0	5.35362	2.48422	2.39154	1.82536	0	10.7888	0	0	0.553717	0	0	0	0	0	0	5
1382	POLR1H	full-splice_match	reference_match	FALSE	5	5	12	3	1	0	0	1	3	0	0	1	0	4	7	1.40885	0.95547	2.20758	0.684512	0.713818	0	0	2.13542	1.66115	0	0	0.643941	0	1.67271	3.15134	6
1383	POLR1H	full-splice_match	reference_match	FALSE	7	9	4	0	4	6	0	0	3	7	0	0	0	0	0	1.97239	1.71985	0.73586	0	2.85527	5.88482	0	0	1.66115	3.46565	0	0	0	0	0	6
1393	RPP21	full-splice_match	reference_match	FALSE	172	168	0	0	0	0	0	0	0	37	29	0	19	0	0	48.4644	32.1038	0	0	0	0	0	0	0	18.3184	12.6823	0	6.5413	0	0	5
1399	RPP21	incomplete-splice_match	3prime_fragment	FALSE	2	0	8	1	0	5	1	2	0	1	4	3	0	0	7	0.563539	0	1.47172	0.228171	0	4.90402	1.62645	4.27085	0	0.495093	1.74928	1.93182	0	0	3.15134	7
1402	RPP21	full-splice_match	reference_match	FALSE	27	40	0	0	0	0	0	0	0	8	15	0	0	0	0	7.60778	7.64376	0	0	0	0	0	0	0	3.96075	6.55981	0	0	0	0	4
1405	RPP21	full-splice_match	reference_match	FALSE	29	14	0	15	0	0	0	0	13	1	21	0	0	0	0	8.17132	2.67532	0	3.42256	0	0	0	0	7.19832	0.495093	9.18374	0	0	0	0	5
1414	ABCF1	incomplete-splice_match	5prime_fragment	FALSE	6	6	7	9	0	0	2	0	2	3	4	0	1	0	0	1.69062	1.14656	1.28775	2.05354	0	0	3.25289	0	1.10743	1.48528	1.74928	0	0.344279	0	0	8
1417	ABCF1	incomplete-splice_match	5prime_fragment	FALSE	10	15	9	11	3	1	4	3	9	5	9	6	6	2	5	2.8177	2.86641	1.65568	2.50988	2.14145	0.980804	6.50579	6.40627	4.98345	2.47547	3.93589	3.86365	2.06567	0.836354	2.25096	13
1419	MRPS18B	full-splice_match	alternative_5end	FALSE	57	54	77	35	0	0	0	0	29	0	0	0	0	27	0	16.0609	10.3191	14.1653	7.98597	0	0	0	0	16.0578	0	0	0	0	11.2908	0	6
1424	C6orf136	full-splice_match	alternative_3end	FALSE	18	14	5	47	13	0	0	0	16	0	0	24	0	11	33	5.07185	2.67532	0.919825	10.724	9.27963	0	0	0	8.85947	0	0	15.4546	0	4.59995	14.8563	8
1431	TUBB	full-splice_match	alternative_3end5end	FALSE	12	148	48	310	1	0	0	0	57	0	0	0	200	51	0	3.38124	28.2819	8.83032	70.7329	0.713818	0	0	0	31.5618	0	0	0	68.8558	21.327	0	7
1432	novelGene_IER3_AS	antisense	multi-exon	FALSE	1	0	4	0	4	0	1	1	0	0	1	1	7	0	0	0.28177	0	0.73586	0	2.85527	0	1.62645	2.13542	0	0	0.437321	0.643941	2.40995	0	0	4
1437	NFKBIL1	full-splice_match	reference_match	FALSE	20	5	16	0	0	0	0	3	10	0	0	0	14	2	18	5.63539	0.95547	2.94344	0	0	0	0	6.40627	5.53717	0	0	0	4.81991	0.836354	8.10346	6
1441	AIF1	full-splice_match	reference_match	FALSE	9	14	54	1	0	0	0	0	0	3	3	1	8	1	4	2.53593	2.67532	9.93411	0.228171	0	0	0	0	0	1.48528	1.31196	0.643941	2.75423	0.418177	1.80077	7
1451	CSNK2B	full-splice_match	reference_match	FALSE	142	201	0	185	26	0	29	21	0	0	12	0	0	0	0	40.0113	38.4099	0	42.2116	18.5593	0	47.167	44.8439	0	0	5.24785	0	0	0	0	7
1457	PSMB9	full-splice_match	alternative_3end	FALSE	1	0	34	0	0	0	0	0	4	3	0	0	3	2	0	0.28177	0	6.25481	0	0	0	0	0	2.21487	1.48528	0	0	1.03284	0.836354	0	4
1460	BRD2	incomplete-splice_match	internal_fragment	FALSE	10	0	1	0	3	0	3	0	0	10	19	4	0	11	7	2.8177	0	0.183965	0	2.14145	0	4.87934	0	0	4.95093	8.30909	2.57576	0	4.59995	3.15134	8
1477	SYNGAP1	incomplete-splice_match	3prime_fragment	FALSE	5	0	10	0	0	7	0	4	2	0	9	8	5	1	0	1.40885	0	1.83965	0	0	6.86563	0	8.5417	1.10743	0	3.93589	5.15153	1.7214	0.418177	0	8
1490	STK19B	incomplete-splice_match	3prime_fragment	FALSE	1	2	0	1	9	3	2	0	0	0	0	0	7	0	0	0.28177	0.382188	0	0.228171	6.42436	2.94241	3.25289	0	0	0	0	0	2.40995	0	0	4
1507	ATP6V1G2	full-splice_match	reference_match	FALSE	51	60	68	117	27	1	19	15	1	2	103	73	6	66	111	14.3703	11.4656	12.5096	26.696	19.2731	0.980804	30.9025	32.0314	0.553717	0.990186	45.044	47.0077	2.06567	27.5997	49.9713	12
1511	C6orf47	full-splice_match	mono-exon	FALSE	13	16	14	10	1	0	1	1	7	5	5	2	9	5	9	3.66301	3.05751	2.57551	2.28171	0.713818	0	1.62645	2.13542	3.87602	2.47547	2.1866	1.28788	3.09851	2.09089	4.05173	13
1514	ABHD16A	incomplete-splice_match	3prime_fragment	FALSE	18	0	1	0	0	0	0	0	21	1	0	0	46	0	39	5.07185	0	0.183965	0	0	0	0	0	11.628	0.495093	0	0	15.8368	0	17.5575	4
1516	DDAH2	full-splice_match	alternative_5end	FALSE	9	6	10	0	0	0	0	0	5	0	0	0	1	0	0	2.53593	1.14656	1.83965	0	0	0	0	0	2.76858	0	0	0	0.344279	0	0	4
1526	PPP1R10	incomplete-splice_match	5prime_fragment	FALSE	36	26	8	11	15	9	6	5	21	2	12	22	9	8	31	10.1437	4.96845	1.47172	2.50988	10.7073	8.82723	9.75868	10.6771	11.628	0.990186	5.24785	14.1667	3.09851	3.34542	13.956	14
1532	FLOT1	incomplete-splice_match	3prime_fragment	FALSE	5	1	0	0	3	0	0	0	0	8	0	6	0	3	0	1.40885	0.191094	0	0	2.14145	0	0	0	0	3.96075	0	3.86365	0	1.25453	0	5
1536	FLOT1	full-splice_match	alternative_3end5end	FALSE	3	19	72	80	0	0	0	0	0	0	118	55	0	1	1	0.845309	3.63079	13.2455	18.2536	0	0	0	0	0	0	51.6039	35.4168	0	0.418177	0.450192	5
1538	FLOT1	incomplete-splice_match	3prime_fragment	FALSE	1	74	0	11	35	0	0	0	2	1	0	0	1	0	1	0.28177	14.141	0	2.50988	24.9836	0	0	0	1.10743	0.495093	0	0	0.344279	0	0.450192	4
1544	IER3	full-splice_match	reference_match	FALSE	8	0	9	0	0	0	2	0	0	0	0	0	1	13	0	2.25416	0	1.65568	0	0	0	3.25289	0	0	0	0	0	0.344279	5.4363	0	4
1545	IER3	full-splice_match	mono-exon	FALSE	1	8	1	9	7	4	0	1	2	6	5	4	2	1	3	0.28177	1.52875	0.183965	2.05354	4.99672	3.92321	0	2.13542	1.10743	2.97056	2.1866	2.57576	0.688558	0.418177	1.35058	10
1550	NELFE	full-splice_match	alternative_5end	FALSE	25	22	39	25	0	0	2	0	13	0	0	0	0	2	0	7.04424	4.20407	7.17463	5.70426	0	0	3.25289	0	7.19832	0	0	0	0	0.836354	0	6
1553	NELFE	incomplete-splice_match	5prime_fragment	FALSE	22	26	37	9	3	1	1	0	10	2	5	10	6	17	7	6.19893	4.96845	6.8067	2.05354	2.14145	0.980804	1.62645	0	5.53717	0.990186	2.1866	6.43941	2.06567	7.10901	3.15134	12
1555	TNXA	incomplete-splice_match	3prime_fragment	FALSE	4	0	0	7	0	0	0	0	1	0	0	0	24	0	12	1.12708	0	0	1.59719	0	0	0	0	0.553717	0	0	0	8.2627	0	5.40231	4
1562	PSMB8	full-splice_match	reference_match	FALSE	8	19	25	2	3	0	0	0	0	0	3	0	0	1	2	2.25416	3.63079	4.59912	0.456341	2.14145	0	0	0	0	0	1.31196	0	0	0.418177	0.900384	5
1567	HLA-DPA1	incomplete-splice_match	3prime_fragment	FALSE	16	19	16	34	0	0	0	3	0	0	12	0	19	0	1	4.50831	3.63079	2.94344	7.7578	0	0	0	6.40627	0	0	5.24785	0	6.5413	0	0.450192	7
1571	CUTA	full-splice_match	reference_match	FALSE	240	63	64	23	1	3	0	2	117	7	2	103	6	9	2	67.6247	12.0389	11.7738	5.24792	0.713818	2.94241	0	4.27085	64.7848	3.46565	0.874642	66.3259	2.06567	3.76359	0.900384	11
1572	CUTA	novel_in_catalog	combination_of_known_junctions	FALSE	10	3	6	0	0	1	1	0	1	5	1	0	0	4	0	2.8177	0.573282	1.10379	0	0	0.980804	1.62645	0	0.553717	2.47547	0.437321	0	0	1.67271	0	5
1574	CUTA	novel_in_catalog	combination_of_known_junctions	FALSE	11	7	12	5	0	0	0	0	0	2	0	0	4	6	0	3.09947	1.33766	2.20758	1.14085	0	0	0	0	0	0.990186	0	0	1.37712	2.50906	0	6
1578	CUTA	full-splice_match	alternative_5end	FALSE	227	216	247	71	11	2	3	20	53	14	34	16	12	66	94	63.9617	41.2763	45.4393	16.2001	7.85199	1.96161	4.87934	42.7085	29.347	6.9313	14.8689	10.3031	4.13135	27.5997	42.3181	15
1586	CUTA	full-splice_match	alternative_3end	FALSE	289	486	285	107	59	40	5	4	70	23	26	34	55	66	1	81.4314	92.8717	52.43	24.4143	42.1152	39.2321	8.13224	8.5417	38.7602	11.3871	11.3703	21.894	18.9354	27.5997	0.450192	14
1592	CUTA	full-splice_match	alternative_3end5end	FALSE	83	35	119	314	9	6	22	3	20	122	107	13	178	183	17	23.3869	6.68829	21.8918	71.6456	6.42436	5.88482	35.7818	6.40627	11.0743	60.4014	46.7933	8.37123	61.2817	76.5264	7.65327	15
1597	CUTA	full-splice_match	alternative_3end5end	FALSE	6	4	1	0	1	0	1	1	0	1	1	0	0	4	1	1.69062	0.764376	0.183965	0	0.713818	0	1.62645	2.13542	0	0.495093	0.437321	0	0	1.67271	0.450192	4
1599	YTHDC1	incomplete-splice_match	3prime_fragment	FALSE	56	0	0	0	0	0	0	0	0	0	65	41	4	1	0	15.7791	0	0	0	0	0	0	0	0	0	28.4259	26.4016	1.37712	0.418177	0	4
1604	YTHDC1	incomplete-splice_match	5prime_fragment	FALSE	3	20	17	5	2	5	0	2	3	4	2	0	0	0	1	0.845309	3.82188	3.1274	1.14085	1.42764	4.90402	0	4.27085	1.66115	1.98037	0.874642	0	0	0	0.450192	8
1605	YTHDC1	incomplete-splice_match	5prime_fragment	FALSE	21	71	37	24	22	17	7	3	4	6	13	8	14	12	7	5.91716	13.5677	6.8067	5.47609	15.704	16.6737	11.3851	6.40627	2.21487	2.97056	5.68517	5.15153	4.81991	5.01813	3.15134	15
1606	YTHDC1	incomplete-splice_match	5prime_fragment	FALSE	88	113	106	50	25	12	14	11	17	22	35	32	28	35	14	24.7957	21.5936	19.5003	11.4085	17.8454	11.7696	22.7703	23.4897	9.41318	10.892	15.3062	20.6061	9.63982	14.6362	6.30269	15
1609	ARL17B	incomplete-splice_match	intron_retention	FALSE	7	5	7	5	1	1	0	0	2	1	6	0	2	0	2	1.97239	0.95547	1.28775	1.14085	0.713818	0.980804	0	0	1.10743	0.495093	2.62392	0	0.688558	0	0.900384	5
1610	ARL17B	incomplete-splice_match	5prime_fragment	FALSE	9	28	0	4	13	0	9	1	0	5	0	0	1	0	1	2.53593	5.35063	0	0.912682	9.27963	0	14.638	2.13542	0	2.47547	0	0	0.344279	0	0.450192	6
1611	ARL17B	incomplete-splice_match	5prime_fragment	FALSE	2	2	3	0	1	0	3	0	4	3	0	1	3	0	2	0.563539	0.382188	0.551895	0	0.713818	0	4.87934	0	2.21487	1.48528	0	0.643941	1.03284	0	0.900384	4
1612	ARL17B	full-splice_match	alternative_3end	FALSE	7	4	5	0	0	0	1	0	2	0	0	0	2	0	3	1.97239	0.764376	0.919825	0	0	0	1.62645	0	1.10743	0	0	0	0.688558	0	1.35058	4
1618	KANSL1	full-splice_match	alternative_3end	FALSE	7	111	18	7	1	8	3	3	10	4	18	7	4	17	32	1.97239	21.2114	3.31137	1.59719	0.713818	7.84643	4.87934	6.40627	5.53717	1.98037	7.87177	4.50759	1.37712	7.10901	14.4061	14
1620	MAPT-AS1	full-splice_match	alternative_3end5end	FALSE	8	4	17	2	2	0	1	0	2	0	3	0	2	2	1	2.25416	0.764376	3.1274	0.456341	1.42764	0	1.62645	0	1.10743	0	1.31196	0	0.688558	0.836354	0.450192	6
1622	ENSG00000281487	novel_not_in_catalog	UTR_UTR	TRUE	5	82	25	0	2	7	0	1	0	36	6	0	7	5	17	1.40885	15.6697	4.59912	0	1.42764	6.86563	0	2.13542	0	17.8234	2.62392	0	2.40995	2.09089	7.65327	11
1623	ENSG00000281487	novel_not_in_catalog	UTR_UTR	TRUE	1	64	20	4	0	0	0	0	8	3	1	0	0	1	5	0.28177	12.23	3.6793	0.912682	0	0	0	0	4.42973	1.48528	0.437321	0	0	0.418177	2.25096	5
1624	ENSG00000281487	full-splice_match	mono-exon	FALSE	1	0	0	0	0	1	0	0	4	4	2	2	0	2	73	0.28177	0	0	0	0	0.980804	0	0	2.21487	1.98037	0.874642	1.28788	0	0.836354	32.864	4
1627	ENSG00000275574	full-splice_match	mono-exon	FALSE	2	2	10	0	0	2	3	0	0	11	2	2	0	4	1	0.563539	0.382188	1.83965	0	0	1.96161	4.87934	0	0	5.44602	0.874642	1.28788	0	1.67271	0.450192	6
1628	NSF	incomplete-splice_match	5prime_fragment	FALSE	32	12	29	11	5	3	3	1	2	8	6	6	10	9	6	9.01663	2.29313	5.33498	2.50988	3.56909	2.94241	4.87934	2.13542	1.10743	3.96075	2.62392	3.86365	3.44279	3.76359	2.70115	15
1629	NSF	incomplete-splice_match	5prime_fragment	FALSE	5	8	20	4	0	0	0	0	8	0	4	5	8	0	1	1.40885	1.52875	3.6793	0.912682	0	0	0	0	4.42973	0	1.74928	3.21971	2.75423	0	0.450192	7
1630	NSF	incomplete-splice_match	5prime_fragment	FALSE	12	0	12	3	0	0	2	0	0	0	0	1	1	4	0	3.38124	0	2.20758	0.684512	0	0	3.25289	0	0	0	0	0.643941	0.344279	1.67271	0	4
1633	NSF	incomplete-splice_match	5prime_fragment	FALSE	9	0	2	1	4	4	1	3	1	4	2	3	5	4	2	2.53593	0	0.36793	0.228171	2.85527	3.92321	1.62645	6.40627	0.553717	1.98037	0.874642	1.93182	1.7214	1.67271	0.900384	9
1635	NSF	incomplete-splice_match	5prime_fragment	FALSE	5	4	4	2	3	1	0	2	4	3	0	4	5	5	9	1.40885	0.764376	0.73586	0.456341	2.14145	0.980804	0	4.27085	2.21487	1.48528	0	2.57576	1.7214	2.09089	4.05173	9
1646	NSFP1	incomplete-splice_match	5prime_fragment	FALSE	20	17	19	0	0	0	0	1	0	7	14	12	13	14	16	5.63539	3.2486	3.49533	0	0	0	0	2.13542	0	3.46565	6.12249	7.72729	4.47563	5.85448	7.20307	10
1648	NSFP1	incomplete-splice_match	5prime_fragment	FALSE	5	3	1	0	3	0	4	0	3	1	7	7	1	4	3	1.40885	0.573282	0.183965	0	2.14145	0	6.50579	0	1.66115	0.495093	3.06125	4.50759	0.344279	1.67271	1.35058	8
1649	NSFP1	incomplete-splice_match	5prime_fragment	FALSE	5	3	6	0	0	2	1	2	5	2	5	3	13	2	1	1.40885	0.573282	1.10379	0	0	1.96161	1.62645	4.27085	2.76858	0.990186	2.1866	1.93182	4.47563	0.836354	0.450192	9
1650	LRRC37A	incomplete-splice_match	3prime_fragment	FALSE	1	32	4	0	0	0	1	0	1	19	3	2	0	2	5	0.28177	6.11501	0.73586	0	0	0	1.62645	0	0.553717	9.40677	1.31196	1.28788	0	0.836354	2.25096	6
1652	PLEKHM1	incomplete-splice_match	5prime_fragment	FALSE	9	11	10	0	0	2	7	0	0	2	3	3	4	2	2	2.53593	2.10204	1.83965	0	0	1.96161	11.3851	0	0	0.990186	1.31196	1.93182	1.37712	0.836354	0.900384	8
1661	KANSL1-AS1	full-splice_match	reference_match	FALSE	12	7	38	5	0	2	1	1	2	3	3	2	2	3	8	3.38124	1.33766	6.99067	1.14085	0	1.96161	1.62645	2.13542	1.10743	1.48528	1.31196	1.28788	0.688558	1.25453	3.60154	13
1665	Metazoa_SRP	full-splice_match	mono-exon	FALSE	6	5	3	13	6	7	7	3	12	12	14	8	9	9	16	1.69062	0.95547	0.551895	2.96622	4.28291	6.86563	11.3851	6.40627	6.6446	5.94112	6.12249	5.15153	3.09851	3.76359	7.20307	13
1671	MRPS36	incomplete-splice_match	3prime_fragment	FALSE	7	0	2	23	0	0	0	0	1	10	1	0	3	15	0	1.97239	0	0.36793	5.24792	0	0	0	0	0.553717	4.95093	0.437321	0	1.03284	6.27266	0	5
1675	CDK7	full-splice_match	alternative_3end	FALSE	2	8	5	1	3	2	1	0	2	1	1	7	3	4	2	0.563539	1.52875	0.919825	0.228171	2.14145	1.96161	1.62645	0	1.10743	0.495093	0.437321	4.50759	1.03284	1.67271	0.900384	8
1679	RAD17	incomplete-splice_match	5prime_fragment	FALSE	3	6	15	7	0	0	0	0	0	0	2	3	2	7	0	0.845309	1.14656	2.75947	1.59719	0	0	0	0	0	0	0.874642	1.93182	0.688558	2.92724	0	5
1689	RAD17	incomplete-splice_match	5prime_fragment	FALSE	3	2	11	2	0	1	0	1	4	2	4	3	8	1	3	0.845309	0.382188	2.02361	0.456341	0	0.980804	0	2.13542	2.21487	0.990186	1.74928	1.93182	2.75423	0.418177	1.35058	7
1690	RAD17	incomplete-splice_match	5prime_fragment	FALSE	2	12	9	0	0	0	0	1	3	2	0	4	0	0	1	0.563539	2.29313	1.65568	0	0	0	0	2.13542	1.66115	0.990186	0	2.57576	0	0	0.450192	5
1706	GTF2H2	novel_in_catalog	combination_of_known_splicesites	FALSE	1	5	3	4	2	0	0	0	2	0	1	3	2	3	6	0.28177	0.95547	0.551895	0.912682	1.42764	0	0	0	1.10743	0	0.437321	1.93182	0.688558	1.25453	2.70115	5
1707	GTF2H2	incomplete-splice_match	5prime_fragment	FALSE	1	10	2	2	7	4	1	0	0	0	2	3	2	2	0	0.28177	1.91094	0.36793	0.456341	4.99672	3.92321	1.62645	0	0	0	0.874642	1.93182	0.688558	0.836354	0	5
1712	ENSG00000290506	incomplete-splice_match	5prime_fragment	FALSE	7	13	13	0	0	1	0	0	2	0	0	1	2	1	1	1.97239	2.48422	2.39154	0	0	0.980804	0	0	1.10743	0	0	0.643941	0.688558	0.418177	0.450192	4
1718	GTF2H2	incomplete-splice_match	3prime_fragment	FALSE	1	1	0	0	4	0	0	0	3	1	7	0	2	9	0	0.28177	0.191094	0	0	2.85527	0	0	0	1.66115	0.495093	3.06125	0	0.688558	3.76359	0	4
1733	SMN2	full-splice_match	reference_match	FALSE	16	47	6	4	0	1	0	1	0	33	31	0	0	13	0	4.50831	8.98142	1.10379	0.912682	0	0.980804	0	2.13542	0	16.3381	13.5569	0	0	5.4363	0	7
1737	SMN2	incomplete-splice_match	5prime_fragment	FALSE	5	4	7	2	2	1	2	0	0	0	5	0	2	0	0	1.40885	0.764376	1.28775	0.456341	1.42764	0.980804	3.25289	0	0	0	2.1866	0	0.688558	0	0	5
1742	SMN2	incomplete-splice_match	5prime_fragment	FALSE	2	0	3	4	2	3	1	1	1	0	0	2	2	4	2	0.563539	0	0.551895	0.912682	1.42764	2.94241	1.62645	2.13542	0.553717	0	0	1.28788	0.688558	1.67271	0.900384	6
1743	SMN2	incomplete-splice_match	5prime_fragment	FALSE	29	3	1	7	11	25	0	19	12	0	18	16	0	8	15	8.17132	0.573282	0.183965	1.59719	7.85199	24.5201	0	40.5731	6.6446	0	7.87177	10.3031	0	3.34542	6.75288	10
1748	SERF1B	full-splice_match	reference_match	FALSE	99	60	102	36	5	3	10	2	18	35	26	8	30	27	23	27.8952	11.4656	18.7644	8.21414	3.56909	2.94241	16.2645	4.27085	9.9669	17.3283	11.3703	5.15153	10.3284	11.2908	10.3544	15
1749	SERF1B	full-splice_match	alternative_3end5end	FALSE	12	0	17	2	4	1	4	1	6	4	3	1	8	3	5	3.38124	0	3.1274	0.456341	2.85527	0.980804	6.50579	2.13542	3.3223	1.98037	1.31196	0.643941	2.75423	1.25453	2.25096	11
1751	SERF1B	incomplete-splice_match	5prime_fragment	FALSE	29	11	42	4	0	7	7	5	2	11	30	1	15	6	7	8.17132	2.10204	7.72653	0.912682	0	6.86563	11.3851	10.6771	1.10743	5.44602	13.1196	0.643941	5.16419	2.50906	3.15134	12
1753	SERF1B	incomplete-splice_match	5prime_fragment	FALSE	4	1	0	3	6	7	5	1	1	0	11	6	5	3	3	1.12708	0.191094	0	0.684512	4.28291	6.86563	8.13224	2.13542	0.553717	0	4.81053	3.86365	1.7214	1.25453	1.35058	10
1754	ENSG00000275311	full-splice_match	mono-exon	FALSE	32	107	43	94	11	15	3	1	42	12	7	8	34	27	25	9.01663	20.4471	7.91049	21.448	7.85199	14.7121	4.87934	2.13542	23.2561	5.94112	3.06125	5.15153	11.7055	11.2908	11.2548	15
1755	ENSG00000277036	full-splice_match	mono-exon	FALSE	5	8	28	60	7	8	0	1	20	8	8	6	8	15	12	1.40885	1.52875	5.15102	13.6902	4.99672	7.84643	0	2.13542	11.0743	3.96075	3.49857	3.86365	2.75423	6.27266	5.40231	14
1756	ENSG00000273847	full-splice_match	mono-exon	FALSE	21	108	91	53	8	6	0	5	38	12	10	3	32	22	9	5.91716	20.6382	16.7408	12.093	5.71054	5.88482	0	10.6771	21.0412	5.94112	4.37321	1.93182	11.0169	9.1999	4.05173	14
1758	CCDC125	incomplete-splice_match	5prime_fragment	FALSE	6	1	5	5	0	5	1	0	0	2	1	0	3	0	0	1.69062	0.191094	0.919825	1.14085	0	4.90402	1.62645	0	0	0.990186	0.437321	0	1.03284	0	0	5
1760	ENSG00000275825	full-splice_match	mono-exon	FALSE	4	19	42	9	1	0	1	3	11	3	1	2	3	2	7	1.12708	3.63079	7.72653	2.05354	0.713818	0	1.62645	6.40627	6.09088	1.48528	0.437321	1.28788	1.03284	0.836354	3.15134	11
1761	ENSG00000275536	full-splice_match	mono-exon	FALSE	15	5	0	0	0	0	2	0	30	27	1	0	1	18	1	4.22655	0.95547	0	0	0	0	3.25289	0	16.6115	13.3675	0.437321	0	0.344279	7.52719	0.450192	5
1765	AK6	full-splice_match	alternative_3end	FALSE	58	121	116	108	22	15	12	0	34	37	16	21	49	70	11	16.3426	23.1224	21.3399	24.6424	15.704	14.7121	19.5174	0	18.8264	18.3184	6.99713	13.5228	16.8697	29.2724	4.95211	14
1771	AK6	full-splice_match	alternative_3end5end	FALSE	7	2	3	0	1	0	0	0	2	1	3	5	1	3	2	1.97239	0.382188	0.551895	0	0.713818	0	0	0	1.10743	0.495093	1.31196	3.21971	0.344279	1.25453	0.900384	5
1774	GTF2H2C_2	incomplete-splice_match	3prime_fragment	FALSE	1	5	2	7	9	2	1	0	4	8	0	1	7	2	9	0.28177	0.95547	0.36793	1.59719	6.42436	1.96161	1.62645	0	2.21487	3.96075	0	0.643941	2.40995	0.836354	4.05173	8
1776	GTF2H2C_2	incomplete-splice_match	3prime_fragment	FALSE	5	0	1	5	0	0	0	0	0	0	2	0	0	5	11	1.40885	0	0.183965	1.14085	0	0	0	0	0	0	0.874642	0	0	2.09089	4.95211	4
1780	GTF2H2C_2	full-splice_match	reference_match	FALSE	1	6	15	8	0	0	0	1	2	4	0	3	4	2	8	0.28177	1.14656	2.75947	1.82536	0	0	0	2.13542	1.10743	1.98037	0	1.93182	1.37712	0.836354	3.60154	9
1789	TAF9	full-splice_match	alternative_5end	FALSE	100	109	186	183	20	20	23	0	6	111	111	9	120	45	6	28.177	20.8293	34.2175	41.7552	14.2764	19.6161	37.4083	0	3.3223	54.9553	48.5426	5.79547	41.3135	18.818	2.70115	14
1796	TAF9	incomplete-splice_match	5prime_fragment	FALSE	2	4	2	2	0	2	0	1	0	2	4	2	2	0	1	0.563539	0.764376	0.36793	0.456341	0	1.96161	0	2.13542	0	0.990186	1.74928	1.28788	0.688558	0	0.450192	4
1799	INTS3	incomplete-splice_match	5prime_fragment	FALSE	8	14	12	6	6	3	0	2	0	3	5	4	2	0	7	2.25416	2.67532	2.20758	1.36902	4.28291	2.94241	0	4.27085	0	1.48528	2.1866	2.57576	0.688558	0	3.15134	11
1803	SLC27A3	novel_in_catalog	combination_of_known_splicesites,intron_retention	FALSE	4	0	18	0	0	0	0	0	0	3	36	20	2	1	32	1.12708	0	3.31137	0	0	0	0	0	0	1.48528	15.7435	12.8788	0.688558	0.418177	14.4061	6
1810	ENSG00000261905	incomplete-splice_match	3prime_fragment	FALSE	18	0	17	33	0	0	0	0	12	22	0	12	0	12	15	5.07185	0	3.1274	7.52963	0	0	0	0	6.6446	10.892	0	7.72729	0	5.01813	6.75288	8
1818	ENTREP3	incomplete-splice_match	3prime_fragment	FALSE	6	0	50	0	0	43	0	0	40	0	0	0	111	0	1	1.69062	0	9.19825	0	0	42.1746	0	0	22.1487	0	0	0	38.215	0	0.450192	5
1830	SCAMP3	full-splice_match	alternative_5end	FALSE	4	222	2	45	0	0	0	0	0	0	0	112	0	0	98	1.12708	42.4229	0.36793	10.2677	0	0	0	0	0	0	0	72.1214	0	0	44.1188	5
1834	CLK2	incomplete-splice_match	3prime_fragment	FALSE	3	59	2	78	61	37	0	0	1	1	0	0	0	0	1	0.845309	11.2746	0.36793	17.7973	43.5429	36.2897	0	0	0.553717	0.495093	0	0	0	0	0.450192	4
1839	HCN3	incomplete-splice_match	3prime_fragment	FALSE	1	0	17	0	0	0	0	0	1	0	67	42	38	0	0	0.28177	0	3.1274	0	0	0	0	0	0.553717	0	29.3005	27.0455	13.0826	0	0	4
1842	PTPRC	full-splice_match	alternative_3end5end	FALSE	29	8	41	4	0	0	0	0	1	2	4	1	3	2	2	8.17132	1.52875	7.54256	0.912682	0	0	0	0	0.553717	0.990186	1.74928	0.643941	1.03284	0.836354	0.900384	5
1844	PTPRC	incomplete-splice_match	5prime_fragment	FALSE	4	7	15	6	0	0	0	0	2	1	3	1	4	0	7	1.12708	1.33766	2.75947	1.36902	0	0	0	0	1.10743	0.495093	1.31196	0.643941	1.37712	0	3.15134	8
1845	CRIM1-DT	novel_not_in_catalog	UTR_UTR	TRUE	24	27	41	42	13	6	10	3	10	21	17	18	25	14	27	6.76247	5.15954	7.54256	9.58316	9.27963	5.88482	16.2645	6.40627	5.53717	10.397	7.43445	11.5909	8.60698	5.85448	12.1552	15
1846	CRIM1-DT	full-splice_match	mono-exon	FALSE	17	17	36	8	8	8	6	12	3	35	29	8	22	7	17	4.79008	3.2486	6.62274	1.82536	5.71054	7.84643	9.75868	25.6251	1.66115	17.3283	12.6823	5.15153	7.57414	2.92724	7.65327	15
1854	ENSG00000273741	full-splice_match	alternative_3end5end	FALSE	15	11	29	1	3	0	0	1	0	2	0	4	1	10	0	4.22655	2.10204	5.33498	0.228171	2.14145	0	0	2.13542	0	0.990186	0	2.57576	0.344279	4.18177	0	7
1857	DENND11	incomplete-splice_match	5prime_fragment	FALSE	1	1	0	0	4	0	0	3	1	0	3	2	4	2	0	0.28177	0.191094	0	0	2.85527	0	0	6.40627	0.553717	0	1.31196	1.28788	1.37712	0.836354	0	5
1859	SSBP1	incomplete-splice_match	5prime_fragment	FALSE	2	4	7	3	0	3	1	1	0	4	3	1	1	2	0	0.563539	0.764376	1.28775	0.684512	0	2.94241	1.62645	2.13542	0	1.98037	1.31196	0.643941	0.344279	0.836354	0	6
1860	SSBP1	full-splice_match	reference_match	FALSE	6	6	4	2	1	0	0	0	1	1	4	0	0	3	0	1.69062	1.14656	0.73586	0.456341	0.713818	0	0	0	0.553717	0.495093	1.74928	0	0	1.25453	0	4
1862	SSBP1	full-splice_match	alternative_3end	FALSE	13	47	38	16	2	9	8	4	4	6	3	4	16	18	16	3.66301	8.98142	6.99067	3.65073	1.42764	8.82723	13.0116	8.5417	2.21487	2.97056	1.31196	2.57576	5.50847	7.52719	7.20307	15
1866	SSBP1	full-splice_match	alternative_3end	FALSE	11	1	55	3	0	0	0	0	0	5	0	0	0	0	3	3.09947	0.191094	10.1181	0.684512	0	0	0	0	0	2.47547	0	0	0	0	1.35058	4
1870	SSBP1	full-splice_match	alternative_3end	FALSE	41	53	65	36	6	0	4	3	2	1	4	10	8	8	16	11.5526	10.128	11.9577	8.21414	4.28291	0	6.50579	6.40627	1.10743	0.495093	1.74928	6.43941	2.75423	3.34542	7.20307	13
1871	SSBP1	incomplete-splice_match	5prime_fragment	FALSE	21	0	0	18	3	15	0	0	0	0	0	10	0	6	15	5.91716	0	0	4.10707	2.14145	14.7121	0	0	0	0	0	6.43941	0	2.50906	6.75288	7
1874	APBA1	full-splice_match	mono-exon	FALSE	1	10	7	5	3	7	2	1	8	5	7	4	5	7	4	0.28177	1.91094	1.28775	1.14085	2.14145	6.86563	3.25289	2.13542	4.42973	2.47547	3.06125	2.57576	1.7214	2.92724	1.80077	14
1878	ATP23	full-splice_match	alternative_3end	FALSE	5	0	5	0	0	0	0	0	4	2	0	4	5	3	2	1.40885	0	0.919825	0	0	0	0	0	2.21487	0.990186	0	2.57576	1.7214	1.25453	0.900384	5
1879	GIHCG	full-splice_match	mono-exon	FALSE	26	1	4	9	8	12	9	0	1	5	9	15	1	4	2	7.32601	0.191094	0.73586	2.05354	5.71054	11.7696	14.638	0	0.553717	2.47547	3.93589	9.65912	0.344279	1.67271	0.900384	9
1880	GIHCG	full-splice_match	reference_match	FALSE	9	4	4	0	5	0	1	0	4	0	5	6	2	2	8	2.53593	0.764376	0.73586	0	3.56909	0	1.62645	0	2.21487	0	2.1866	3.86365	0.688558	0.836354	3.60154	7
1887	ENSG00000290583	full-splice_match	reference_match	FALSE	5	6	14	6	3	4	0	3	3	6	4	5	2	3	1	1.40885	1.14656	2.57551	1.36902	2.14145	3.92321	0	6.40627	1.66115	2.97056	1.74928	3.21971	0.688558	1.25453	0.450192	12
1893	RPH3AL-AS1	full-splice_match	mono-exon	FALSE	2	0	1	0	3	0	1	0	2	0	1	0	2	2	3	0.563539	0	0.183965	0	2.14145	0	1.62645	0	1.10743	0	0.437321	0	0.688558	0.836354	1.35058	4
1901	ENSG00000263322	full-splice_match	mono-exon	FALSE	9	7	7	25	4	2	1	1	10	5	2	4	6	13	8	2.53593	1.33766	1.28775	5.70426	2.85527	1.96161	1.62645	2.13542	5.53717	2.47547	0.874642	2.57576	2.06567	5.4363	3.60154	14
1903	DSEL	full-splice_match	alternative_3end5end	FALSE	75	86	78	25	15	11	6	7	20	8	19	18	14	42	6	21.1327	16.4341	14.3493	5.70426	10.7073	10.7888	9.75868	14.948	11.0743	3.96075	8.30909	11.5909	4.81991	17.5634	2.70115	15
1905	ZNF66	incomplete-splice_match	5prime_fragment	FALSE	4	11	11	0	3	1	2	1	5	3	3	3	3	1	6	1.12708	2.10204	2.02361	0	2.14145	0.980804	3.25289	2.13542	2.76858	1.48528	1.31196	1.93182	1.03284	0.418177	2.70115	12
1908	ZNF85	full-splice_match	alternative_3end5end	FALSE	4	4	4	1	0	0	1	1	4	2	1	4	1	0	0	1.12708	0.764376	0.73586	0.228171	0	0	1.62645	2.13542	2.21487	0.990186	0.437321	2.57576	0.344279	0	0	5
1917	LSM14A	incomplete-splice_match	5prime_fragment	FALSE	2	5	0	6	2	2	0	0	2	1	0	0	0	0	3	0.563539	0.95547	0	1.36902	1.42764	1.96161	0	0	1.10743	0.495093	0	0	0	0	1.35058	5
1919	LSM14A	incomplete-splice_match	intron_retention	FALSE	5	1	4	1	1	1	1	0	2	0	0	2	1	4	0	1.40885	0.191094	0.73586	0.228171	0.713818	0.980804	1.62645	0	1.10743	0	0	1.28788	0.344279	1.67271	0	5
1923	LSM14A	incomplete-splice_match	5prime_fragment	FALSE	7	9	9	0	3	6	0	0	0	0	0	0	6	0	4	1.97239	1.71985	1.65568	0	2.14145	5.88482	0	0	0	0	0	0	2.06567	0	1.80077	7
1924	LSM14A	incomplete-splice_match	3prime_fragment	FALSE	30	0	0	2	0	0	0	0	1	63	2	1	3	51	0	8.45309	0	0	0.456341	0	0	0	0	0.553717	31.1909	0.874642	0.643941	1.03284	21.327	0	4
1930	GARRE1	full-splice_match	alternative_3end5end	FALSE	167	223	209	108	2	56	26	16	4	6	1	1	2	2	101	47.0555	42.614	38.4487	24.6424	1.42764	54.925	42.2876	34.1668	2.21487	2.97056	0.437321	0.643941	0.688558	0.836354	45.4694	11
1936	ZNF100	full-splice_match	alternative_3end5end	FALSE	11	14	1	8	2	1	0	0	2	0	0	0	4	1	3	3.09947	2.67532	0.183965	1.82536	1.42764	0.980804	0	0	1.10743	0	0	0	1.37712	0.418177	1.35058	7
1940	ZNF43	full-splice_match	mono-exon	FALSE	14	11	33	47	5	5	3	3	6	24	11	11	36	7	15	3.94478	2.10204	6.07084	10.724	3.56909	4.90402	4.87934	6.40627	3.3223	11.8822	4.81053	7.08335	12.394	2.92724	6.75288	15
1945	PAXBP1	full-splice_match	alternative_3end	FALSE	28	63	23	0	1	18	0	3	4	1	0	5	0	10	5	7.88955	12.0389	4.23119	0	0.713818	17.6545	0	6.40627	2.21487	0.495093	0	3.21971	0	4.18177	2.25096	9
1948	IFNGR2	full-splice_match	alternative_3end5end	FALSE	63	0	0	0	0	0	0	0	0	189	240	0	251	0	0	17.7515	0	0	0	0	0	0	0	0	93.5726	104.957	0	86.4141	0	0	4
1951	TMEM50B	novel_in_catalog	combination_of_known_junctions	FALSE	1	0	2	2	0	0	0	2	0	0	15	0	2	17	3	0.28177	0	0.36793	0.456341	0	0	0	4.27085	0	0	6.55981	0	0.688558	7.10901	1.35058	4
1953	TMEM50B	full-splice_match	alternative_3end5end	FALSE	17	96	115	23	10	20	6	0	34	14	32	10	20	19	38	4.79008	18.345	21.156	5.24792	7.13818	19.6161	9.75868	0	18.8264	6.9313	13.9943	6.43941	6.88558	7.94537	17.1073	14
1958	TMEM50B	incomplete-splice_match	5prime_fragment	FALSE	1	3	6	4	0	2	0	0	1	3	3	2	6	4	4	0.28177	0.573282	1.10379	0.912682	0	1.96161	0	0	0.553717	1.48528	1.31196	1.28788	2.06567	1.67271	1.80077	8
1959	TMEM50B	incomplete-splice_match	5prime_fragment	FALSE	4	8	4	0	0	0	1	0	0	2	3	1	0	2	1	1.12708	1.52875	0.73586	0	0	0	1.62645	0	0	0.990186	1.31196	0.643941	0	0.836354	0.450192	4
1960	TMEM50B	full-splice_match	alternative_3end	FALSE	9	3	3	2	6	2	1	4	4	1	9	11	4	4	9	2.53593	0.573282	0.551895	0.456341	4.28291	1.96161	1.62645	8.5417	2.21487	0.495093	3.93589	7.08335	1.37712	1.67271	4.05173	11
1961	TMEM50B	incomplete-splice_match	3prime_fragment	FALSE	19	1	1	5	1	0	0	1	15	8	0	0	3	2	7	5.35362	0.191094	0.183965	1.14085	0.713818	0	0	2.13542	8.30575	3.96075	0	0	1.03284	0.836354	3.15134	7
1964	DNAJC28	full-splice_match	alternative_3end	FALSE	10	5	9	6	7	1	0	0	0	2	1	0	4	1	8	2.8177	0.95547	1.65568	1.36902	4.99672	0.980804	0	0	0	0.990186	0.437321	0	1.37712	0.418177	3.60154	6
1967	GART	incomplete-splice_match	3prime_fragment	FALSE	6	1	6	2	0	0	0	2	0	0	0	0	13	6	1	1.69062	0.191094	1.10379	0.456341	0	0	0	4.27085	0	0	0	0	4.47563	2.50906	0.450192	5
1971	SMDT1	full-splice_match	alternative_3end5end	FALSE	124	137	172	59	34	21	10	11	62	83	124	58	104	87	56	34.9394	26.1799	31.642	13.4621	24.2698	20.5969	16.2645	23.4897	34.3304	41.0927	54.2278	37.3486	35.805	36.3814	25.2108	15
1976	SMDT1	novel_not_in_catalog	Alt3	FALSE	11	0	3	0	0	0	0	0	0	5	0	6	0	5	0	3.09947	0	0.551895	0	0	0	0	0	0	2.47547	0	3.86365	0	2.09089	0	4
1977	SMDT1	full-splice_match	reference_match	FALSE	16	21	17	11	5	4	1	1	11	6	6	4	15	11	9	4.50831	4.01298	3.1274	2.50988	3.56909	3.92321	1.62645	2.13542	6.09088	2.97056	2.62392	2.57576	5.16419	4.59995	4.05173	15
1978	NDUFA6	full-splice_match	alternative_3end5end	FALSE	101	62	115	35	9	4	2	0	23	19	21	14	34	51	14	28.4587	11.8478	21.156	7.98597	6.42436	3.92321	3.25289	0	12.7355	9.40677	9.18374	9.01518	11.7055	21.327	6.30269	14
1981	OLA1P1	full-splice_match	mono-exon	FALSE	7	4	4	9	0	0	0	0	1	3	2	1	7	2	1	1.97239	0.764376	0.73586	2.05354	0	0	0	0	0.553717	1.48528	0.874642	0.643941	2.40995	0.836354	0.450192	4
1983	CYP2D7	incomplete-splice_match	3prime_fragment	FALSE	6	0	0	0	0	0	0	0	1	0	0	2	9	0	8	1.69062	0	0	0	0	0	0	0	0.553717	0	0	1.28788	3.09851	0	3.60154	4
1988	KIF5C	incomplete-splice_match	5prime_fragment	FALSE	33	169	108	181	15	0	0	7	15	39	57	0	86	37	21	9.2984	32.2949	19.8682	41.2989	10.7073	0	0	14.948	8.30575	19.3086	24.9273	0	29.608	15.4726	9.45403	12
1996	WASH8P	incomplete-splice_match	intron_retention	FALSE	1	8	0	6	4	2	0	0	0	0	1	3	1	0	1	0.28177	1.52875	0	1.36902	2.85527	1.96161	0	0	0	0	0.437321	1.93182	0.344279	0	0.450192	5
1999	WASH8P	incomplete-splice_match	3prime_fragment	FALSE	6	2	0	139	2	2	185	44	5	3	2	0	9	7	2	1.69062	0.382188	0	31.7157	1.42764	1.96161	300.893	93.9587	2.76858	1.48528	0.874642	0	3.09851	2.92724	0.900384	10
2001	WASH8P	novel_not_in_catalog	novel_exon	FALSE	1	0	1	0	1	4	1	0	3	0	1	2	1	3	0	0.28177	0	0.183965	0	0.713818	3.92321	1.62645	0	1.66115	0	0.437321	1.28788	0.344279	1.25453	0	5
2005	ENSG00000282676	full-splice_match	mono-exon	FALSE	8	9	20	7	30	42	21	8	10	6	28	13	8	34	35	2.25416	1.71985	3.6793	1.59719	21.4145	41.1938	34.1554	17.0834	5.53717	2.97056	12.245	8.37123	2.75423	14.218	15.7567	15
2008	SMIM10L1	full-splice_match	mono-exon	FALSE	33	58	30	10	10	0	0	2	13	0	5	20	12	13	3	9.2984	11.0835	5.51895	2.28171	7.13818	0	0	4.27085	7.19832	0	2.1866	12.8788	4.13135	5.4363	1.35058	12
2012	TAS2R14	full-splice_match	mono-exon	FALSE	6	4	13	16	3	2	2	2	9	14	3	4	4	3	19	1.69062	0.764376	2.39154	3.65073	2.14145	1.96161	3.25289	4.27085	4.98345	6.9313	1.31196	2.57576	1.37712	1.25453	8.55365	14
2017	TAS2R15P	full-splice_match	mono-exon	FALSE	5	5	1	10	2	0	0	2	15	20	7	5	6	6	24	1.40885	0.95547	0.183965	2.28171	1.42764	0	0	4.27085	8.30575	9.90186	3.06125	3.21971	2.06567	2.50906	10.8046	11
2018	PRR4	incomplete-splice_match	5prime_fragment	FALSE	18	26	0	0	0	0	0	6	0	0	0	9	0	0	0	5.07185	4.96845	0	0	0	0	0	12.8125	0	0	0	5.79547	0	0	0	4
2019	PRR4	novel_not_in_catalog	novel_exon	FALSE	13	4	43	2	0	0	0	0	1	0	0	4	14	0	3	3.66301	0.764376	7.91049	0.456341	0	0	0	0	0.553717	0	0	2.57576	4.81991	0	1.35058	5
2021	TAS2R20	full-splice_match	mono-exon	FALSE	2	11	3	4	0	2	0	0	4	6	0	1	0	3	2	0.563539	2.10204	0.551895	0.912682	0	1.96161	0	0	2.21487	2.97056	0	0.643941	0	1.25453	0.900384	5
2029	TAS2R30	full-splice_match	mono-exon	FALSE	4	11	3	1	5	0	0	0	1	2	1	3	7	4	8	1.12708	2.10204	0.551895	0.228171	3.56909	0	0	0	0.553717	0.990186	0.437321	1.93182	2.40995	1.67271	3.60154	7
2032	ENSG00000272751	full-splice_match	mono-exon	FALSE	7	15	9	13	0	1	0	1	8	5	3	1	3	3	12	1.97239	2.86641	1.65568	2.96622	0	0.980804	0	2.13542	4.42973	2.47547	1.31196	0.643941	1.03284	1.25453	5.40231	11
2035	NDUFA3	full-splice_match	reference_match	FALSE	563	363	542	255	34	14	31	22	112	69	100	74	94	192	98	158.636	69.3672	99.709	58.1835	24.2698	13.7313	50.4199	46.9793	62.0163	34.1614	43.7321	47.6516	32.3622	80.29	44.1188	15
2049	TFPT	full-splice_match	alternative_5end	FALSE	11	21	14	39	0	1	0	0	0	15	0	0	0	13	0	3.09947	4.01298	2.57551	8.89865	0	0.980804	0	0	0	7.4264	0	0	0	5.4363	0	6
2055	CNOT3	incomplete-splice_match	internal_fragment	FALSE	13	0	0	16	0	0	10	0	0	0	0	0	0	10	0	3.66301	0	0	3.65073	0	0	16.2645	0	0	0	0	0	0	4.18177	0	4
2056	CNOT3	incomplete-splice_match	3prime_fragment	FALSE	20	13	0	0	3	0	3	0	0	8	0	0	0	0	0	5.63539	2.48422	0	0	2.14145	0	4.87934	0	0	3.96075	0	0	0	0	0	5
2057	LENG1	full-splice_match	reference_match	FALSE	11	11	17	8	2	0	0	0	6	3	0	0	6	3	2	3.09947	2.10204	3.1274	1.82536	1.42764	0	0	0	3.3223	1.48528	0	0	2.06567	1.25453	0.900384	9
2059	TSEN34	full-splice_match	alternative_3end	FALSE	18	18	14	16	0	0	0	0	0	0	0	0	0	0	19	5.07185	3.43969	2.57551	3.65073	0	0	0	0	0	0	0	0	0	0	8.55365	5
2060	TSEN34	full-splice_match	reference_match	FALSE	4	1	9	1	1	0	0	3	15	24	0	0	0	3	1	1.12708	0.191094	1.65568	0.228171	0.713818	0	0	6.40627	8.30575	11.8822	0	0	0	1.25453	0.450192	6
2061	RPS9	full-splice_match	reference_match	FALSE	9	0	0	716	0	0	0	0	15	0	14	0	0	0	0	2.53593	0	0	163.37	0	0	0	0	8.30575	0	6.12249	0	0	0	0	4
2064	TTYH1	full-splice_match	alternative_5end	FALSE	21	162	198	0	0	0	0	0	20	0	0	7	0	11	0	5.91716	30.9572	36.4251	0	0	0	0	0	11.0743	0	0	4.50759	0	4.59995	0	6
2080	TTYH1	full-splice_match	reference_match	FALSE	81	185	118	52	0	0	0	0	46	0	0	17	63	205	0	22.8233	35.3524	21.7079	11.8649	0	0	0	0	25.471	0	0	10.947	21.6896	85.7263	0	8
2082	TTYH1	full-splice_match	alternative_5end	FALSE	1	2	0	2	3	0	1	41	1	3	0	2	0	7	2	0.28177	0.382188	0	0.456341	2.14145	0	1.62645	87.5524	0.553717	1.48528	0	1.28788	0	2.92724	0.900384	6
2097	LENG9	full-splice_match	mono-exon	FALSE	3	10	14	3	2	1	3	1	2	2	1	3	7	3	6	0.845309	1.91094	2.57551	0.684512	1.42764	0.980804	4.87934	2.13542	1.10743	0.990186	0.437321	1.93182	2.40995	1.25453	2.70115	10
2100	NDUFA3	full-splice_match	alternative_5end	FALSE	163	87	153	94	14	0	6	14	47	38	54	23	47	49	28	45.9285	16.6252	28.1466	21.448	9.99345	0	9.75868	29.8959	26.0247	18.8135	23.6153	14.8106	16.1811	20.4907	12.6054	14
2108	TFPT	full-splice_match	alternative_5end	FALSE	12	0	16	12	0	0	0	0	0	9	0	4	0	0	0	3.38124	0	2.94344	2.73805	0	0	0	0	0	4.45584	0	2.57576	0	0	0	5
2110	PRPF31	full-splice_match	alternative_5end	FALSE	8	20	18	0	0	0	0	2	0	0	0	0	0	0	0	2.25416	3.82188	3.31137	0	0	0	0	4.27085	0	0	0	0	0	0	0	4
2115	LENG1	full-splice_match	alternative_5end	FALSE	7	13	17	5	1	0	0	1	5	0	0	0	5	0	0	1.97239	2.48422	3.1274	1.14085	0.713818	0	0	2.13542	2.76858	0	0	0	1.7214	0	0	7
2117	RPS9	full-splice_match	reference_match	FALSE	269	376	372	179	14	19	17	12	0	77	96	73	113	164	94	75.796	71.8514	68.4349	40.8425	9.99345	18.6353	27.6496	25.6251	0	38.1222	41.9828	47.0077	38.9035	68.5811	42.3181	14
2128	NDUFA3	full-splice_match	alternative_5end	FALSE	251	174	232	125	22	11	10	12	59	43	75	0	54	116	59	70.7242	33.2504	42.6799	28.5213	15.704	10.7888	16.2645	25.6251	32.6693	21.289	32.7991	0	18.5911	48.5086	26.5613	14
2138	TFPT	full-splice_match	alternative_5end	FALSE	13	11	10	0	0	0	0	2	0	7	3	0	6	0	0	3.66301	2.10204	1.83965	0	0	0	0	4.27085	0	3.46565	1.31196	0	2.06567	0	0	7
2142	LENG1	full-splice_match	reference_match	FALSE	2	5	11	9	0	0	0	1	3	0	0	2	4	2	0	0.563539	0.95547	2.02361	2.05354	0	0	0	2.13542	1.66115	0	0	1.28788	1.37712	0.836354	0	6
2144	MBOAT7	incomplete-splice_match	3prime_fragment	FALSE	14	79	0	0	0	0	0	0	0	0	0	0	136	91	0	3.94478	15.0964	0	0	0	0	0	0	0	0	0	0	46.822	38.0541	0	4
2146	RPS9	full-splice_match	alternative_5end	FALSE	194	0	240	0	6	0	0	7	107	63	78	44	109	124	71	54.6633	0	44.1516	0	4.28291	0	0	14.948	59.2477	31.1909	34.111	28.3334	37.5264	51.854	31.9636	11
2150	RPS9	novel_in_catalog	combination_of_known_splicesites	FALSE	9	1	16	0	12	0	0	0	0	4	0	1	4	0	0	2.53593	0.191094	2.94344	0	8.56581	0	0	0	0	1.98037	0	0.643941	1.37712	0	0	5
2152	RPS9	novel_not_in_catalog	NOT_DEFINED	FALSE	1	7	7	0	4	0	0	0	1	0	3	1	5	4	0	0.28177	1.33766	1.28775	0	2.85527	0	0	0	0.553717	0	1.31196	0.643941	1.7214	1.67271	0	6
2154	RPS9	incomplete-splice_match	3prime_fragment	FALSE	9	5	11	5	0	0	0	1	8	4	2	1	4	1	0	2.53593	0.95547	2.02361	1.14085	0	0	0	2.13542	4.42973	1.98037	0.874642	0.643941	1.37712	0.418177	0	7
2158	NDUFA3	full-splice_match	alternative_5end	FALSE	316	213	310	140	12	13	16	0	104	45	87	50	75	139	0	89.0392	40.703	57.0291	31.9439	8.56581	12.7504	26.0232	0	57.5865	22.2792	38.0469	32.1971	25.8209	58.1266	0	13
2169	TFPT	full-splice_match	reference_match	FALSE	16	9	7	12	3	0	0	0	5	6	0	0	0	0	3	4.50831	1.71985	1.28775	2.73805	2.14145	0	0	0	2.76858	2.97056	0	0	0	0	1.35058	8
2175	LENG1	full-splice_match	reference_match	FALSE	16	10	19	6	2	0	1	0	5	3	0	0	4	6	0	4.50831	1.91094	3.49533	1.36902	1.42764	0	1.62645	0	2.76858	1.48528	0	0	1.37712	2.50906	0	10
2178	RPS9	full-splice_match	alternative_5end	FALSE	212	321	307	137	21	18	15	11	134	76	1	48	93	69	69	59.7352	61.3412	56.4772	31.2594	14.9902	17.6545	24.3967	23.4897	74.198	37.6271	0.437321	30.9092	32.018	28.8542	31.0633	14
2189	NDUFA3	full-splice_match	reference_match	FALSE	1024	671	936	385	52	22	37	22	220	90	176	0	181	340	140	288.532	128.224	172.191	87.8457	37.1185	21.5777	60.1786	46.9793	121.818	44.5584	76.9685	0	62.3145	142.18	63.0269	14
2199	TFPT	full-splice_match	reference_match	FALSE	12	4	12	7	0	0	0	0	0	4	0	1	0	2	0	3.38124	0.764376	2.20758	1.59719	0	0	0	0	0	1.98037	0	0.643941	0	0.836354	0	4
2200	PRPF31	full-splice_match	alternative_5end	FALSE	12	30	13	0	0	0	0	0	0	0	20	0	0	0	0	3.38124	5.73282	2.39154	0	0	0	0	0	0	0	8.74642	0	0	0	0	4
2205	LENG1	full-splice_match	reference_match	FALSE	3	7	6	4	0	0	1	0	4	2	1	0	0	0	2	0.845309	1.33766	1.10379	0.912682	0	0	1.62645	0	2.21487	0.990186	0.437321	0	0	0	0.900384	4
2207	RPS9	full-splice_match	reference_match	FALSE	123	145	157	74	6	9	0	0	65	52	0	0	61	96	48	34.6577	27.7086	28.8825	16.8846	4.28291	8.82723	0	0	35.9916	25.7448	0	0	21.001	40.145	21.6092	11
2210	RPS9	incomplete-splice_match	3prime_fragment	FALSE	5	4	4	1	0	0	6	0	2	2	51	1	4	3	1	1.40885	0.764376	0.73586	0.228171	0	0	9.75868	0	1.10743	0.990186	22.3034	0.643941	1.37712	1.25453	0.450192	6
2218	NDUFA3	full-splice_match	alternative_5end	FALSE	464	248	412	155	37	13	17	10	104	65	0	65	84	153	66	130.741	47.3913	75.7935	35.3664	26.4113	12.7504	27.6496	21.3542	57.5865	32.1811	0	41.8562	28.9194	63.9811	29.7127	14
2222	NDUFA3	novel_not_in_catalog	NOT_DEFINED	FALSE	10	13	9	5	0	1	0	0	4	2	1	1	0	3	3	2.8177	2.48422	1.65568	1.14085	0	0.980804	0	0	2.21487	0.990186	0.437321	0.643941	0	1.25453	1.35058	7
2226	TFPT	full-splice_match	alternative_5end	FALSE	9	6	17	2	0	0	2	0	6	0	0	0	0	0	5	2.53593	1.14656	3.1274	0.456341	0	0	3.25289	0	3.3223	0	0	0	0	0	2.25096	6
2228	PRPF31	full-splice_match	alternative_5end	FALSE	8	5	17	18	0	0	0	0	8	0	9	8	0	8	0	2.25416	0.95547	3.1274	4.10707	0	0	0	0	4.42973	0	3.93589	5.15153	0	3.34542	0	7
2234	LENG1	full-splice_match	alternative_5end	FALSE	22	23	27	9	3	0	0	0	12	5	0	5	7	10	0	6.19893	4.39516	4.96705	2.05354	2.14145	0	0	0	6.6446	2.47547	0	3.21971	2.40995	4.18177	0	10
2237	RPS9	full-splice_match	reference_match	FALSE	146	168	192	48	12	0	5	10	84	40	62	27	67	86	0	41.1384	32.1038	35.3213	10.9522	8.56581	0	8.13224	21.3542	46.5122	19.8037	27.1139	17.3864	23.0667	35.9632	0	13
2241	RPS9	novel_not_in_catalog	NOT_DEFINED	FALSE	3	4	10	36	3	0	0	0	3	0	6	0	0	7	2	0.845309	0.764376	1.83965	8.21414	2.14145	0	0	0	1.66115	0	2.62392	0	0	2.92724	0.900384	6
2244	NDUFA3	full-splice_match	alternative_5end	FALSE	489	0	448	194	0	17	22	16	127	93	128	73	94	162	74	137.785	0	82.4163	44.2651	0	16.6737	35.7818	34.1668	70.322	46.0437	55.9771	47.0077	32.3622	67.7447	33.3142	13
2252	TFPT	full-splice_match	reference_match	FALSE	5	4	0	0	0	0	0	0	16	13	0	0	21	0	0	1.40885	0.764376	0	0	0	0	0	0	8.85947	6.43621	0	0	7.22986	0	0	4
2266	TSEN34	full-splice_match	reference_match	FALSE	9	1	15	0	1	0	0	0	0	7	0	5	0	5	4	2.53593	0.191094	2.75947	0	0.713818	0	0	0	0	3.46565	0	3.21971	0	2.09089	1.80077	6
2267	RPS9	full-splice_match	reference_match	FALSE	188	236	268	129	13	7	7	12	84	50	79	46	24	59	71	52.9727	45.0982	49.3026	29.434	9.27963	6.86563	11.3851	25.6251	46.5122	24.7547	34.5483	29.6213	8.2627	24.6725	31.9636	15
2275	RPS9	full-splice_match	reference_match	FALSE	27	0	58	0	4	0	0	0	0	12	0	5	79	0	0	7.60778	0	10.67	0	2.85527	0	0	0	0	5.94112	0	3.21971	27.1981	0	0	6
2276	RPS9	full-splice_match	alternative_3end	FALSE	19	45	44	1	3	0	0	0	0	30	0	18	0	0	0	5.35362	8.59923	8.09446	0.228171	2.14145	0	0	0	0	14.8528	0	11.5909	0	0	0	6
2278	TTYH1	full-splice_match	alternative_3end	FALSE	234	262	180	44	113	0	0	6	22	129	115	13	211	11	0	65.9341	50.0667	33.1137	10.0395	80.6614	0	0	12.8125	12.1818	63.867	50.2919	8.37123	72.6429	4.59995	0	12
2284	TTYH1	full-splice_match	alternative_5end	FALSE	16	0	6	6	11	0	0	2	183	0	0	11	9	0	0	4.50831	0	1.10379	1.36902	7.85199	0	0	4.27085	101.33	0	0	7.08335	3.09851	0	0	8
2293	TTYH1	incomplete-splice_match	intron_retention	FALSE	4	14	12	14	0	0	0	0	0	0	0	0	0	0	0	1.12708	2.67532	2.20758	3.19439	0	0	0	0	0	0	0	0	0	0	0	4
2304	LENG9	full-splice_match	mono-exon	FALSE	3	2	6	3	28	3	1	0	2	0	4	7	3	1	4	0.845309	0.382188	1.10379	0.684512	19.9869	2.94241	1.62645	0	1.10743	0	1.74928	4.50759	1.03284	0.418177	1.80077	9
2310	NDUFA3	full-splice_match	alternative_5end	FALSE	229	132	196	87	23	0	15	3	46	34	53	34	35	93	45	64.5253	25.2244	36.0571	19.8508	16.4178	0	24.3967	6.40627	25.471	16.8332	23.178	21.894	12.0498	38.8905	20.2586	14
2318	TFPT	full-splice_match	reference_match	FALSE	11	9	6	7	1	3	0	0	1	0	0	0	0	0	0	3.09947	1.71985	1.10379	1.59719	0.713818	2.94241	0	0	0.553717	0	0	0	0	0	0	5
2325	CNOT3	incomplete-splice_match	3prime_fragment	FALSE	4	10	0	30	0	0	0	0	0	0	0	16	0	17	0	1.12708	1.91094	0	6.84512	0	0	0	0	0	0	0	10.3031	0	7.10901	0	5
2326	LENG1	full-splice_match	reference_match	FALSE	10	14	21	22	0	0	0	1	17	18	14	0	20	22	0	2.8177	2.67532	3.86326	5.01975	0	0	0	2.13542	9.41318	8.91168	6.12249	0	6.88558	9.1999	0	10
2330	RPS9	full-splice_match	alternative_5end	FALSE	332	539	563	149	24	19	7	10	168	72	102	63	129	0	88	93.5475	103	103.572	33.9974	17.1316	18.6353	11.3851	21.3542	93.0244	35.6467	44.6067	40.5683	44.412	0	39.6169	14
2341	TAMM41	full-splice_match	alternative_3end	FALSE	4	7	6	1	4	7	3	3	1	1	1	1	2	4	4	1.12708	1.33766	1.10379	0.228171	2.85527	6.86563	4.87934	6.40627	0.553717	0.495093	0.437321	0.643941	0.688558	1.67271	1.80077	9
2345	SMDT1	full-splice_match	alternative_3end5end	FALSE	122	135	213	90	35	11	11	15	70	69	116	60	108	60	60	34.3759	25.7977	39.1845	20.5354	24.9836	10.7888	17.8909	32.0314	38.7602	34.1614	50.7292	38.6365	37.1821	25.0906	27.0115	15
2353	SMDT1	full-splice_match	reference_match	FALSE	29	19	23	17	1	2	2	0	3	2	4	5	24	8	3	8.17132	3.63079	4.23119	3.8789	0.713818	1.96161	3.25289	0	1.66115	0.990186	1.74928	3.21971	8.2627	3.34542	1.35058	12
2359	NDUFA6	full-splice_match	alternative_3end	FALSE	179	60	120	44	8	3	8	1	19	29	25	27	33	68	22	50.4368	11.4656	22.0758	10.0395	5.71054	2.94241	13.0116	2.13542	10.5206	14.3577	10.933	17.3864	11.3612	28.436	9.90423	15
2363	OLA1P1	full-splice_match	mono-exon	FALSE	7	5	9	1	0	0	1	1	2	1	1	3	1	3	0	1.97239	0.95547	1.65568	0.228171	0	0	1.62645	2.13542	1.10743	0.495093	0.437321	1.93182	0.344279	1.25453	0	7
2368	ENSG00000276345	full-splice_match	reference_match	FALSE	151	0	269	0	0	0	0	0	0	0	34	0	69	0	31	42.5472	0	49.4866	0	0	0	0	0	0	0	14.8689	0	23.7553	0	13.956	5
2421	ENSG00000278817	novel_in_catalog	combination_of_known_splicesites	FALSE	55	15	2	5	79	77	0	0	0	1	1	1	2	2	0	15.4973	2.86641	0.36793	1.14085	56.3916	75.5219	0	0	0	0.495093	0.437321	0.643941	0.688558	0.836354	0	5
2424	ENSG00000278817	full-splice_match	reference_match	FALSE	18	69	149	300	2	3	16	1	9	165	121	47	15	1	120	5.07185	13.1855	27.4108	68.4512	1.42764	2.94241	26.0232	2.13542	4.98345	81.6904	52.9158	30.2652	5.16419	0.418177	54.0231	14
2425	ENSG00000278817	incomplete-splice_match	5prime_fragment	FALSE	37	78	63	34	12	33	3	1	13	9	9	21	25	28	19	10.4255	14.9053	11.5898	7.7578	8.56581	32.3665	4.87934	2.13542	7.19832	4.45584	3.93589	13.5228	8.60698	11.709	8.55365	15
2429	ENSG00000277196	incomplete-splice_match	3prime_fragment	FALSE	2	1	131	0	0	1	0	24	0	0	63	0	0	28	0	0.563539	0.191094	24.0994	0	0	0.980804	0	51.2502	0	0	27.5512	0	0	11.709	0	4
2444	PANK4	incomplete-splice_match	3prime_fragment	FALSE	75	1	68	1	2	4	1	0	0	0	0	4	109	5	107	21.1327	0.191094	12.5096	0.228171	1.42764	3.92321	1.62645	0	0	0	0	2.57576	37.5264	2.09089	48.1706	9
2447	HES5	full-splice_match	mono-exon	FALSE	30	1	2	9	3	9	9	7	8	5	7	15	34	2	9	8.45309	0.191094	0.36793	2.05354	2.14145	8.82723	14.638	14.948	4.42973	2.47547	3.06125	9.65912	11.7055	0.836354	4.05173	12
2448	ENSG00000281734	full-splice_match	mono-exon	FALSE	8	6	3	4	7	17	19	18	1	4	20	17	20	7	14	2.25416	1.14656	0.551895	0.912682	4.99672	16.6737	30.9025	38.4376	0.553717	1.98037	8.74642	10.947	6.88558	2.92724	6.30269	12
2452	TTC34	full-splice_match	mono-exon	FALSE	3	2	1	2	0	2	1	3	0	6	3	4	3	0	6	0.845309	0.382188	0.183965	0.456341	0	1.96161	1.62645	6.40627	0	2.97056	1.31196	2.57576	1.03284	0	2.70115	8
2466	SDCCAG8	incomplete-splice_match	5prime_fragment	FALSE	16	13	19	8	3	6	1	3	3	2	5	5	1	3	0	4.50831	2.48422	3.49533	1.82536	2.14145	5.88482	1.62645	6.40627	1.66115	0.990186	2.1866	3.21971	0.344279	1.25453	0	12
2473	SDCCAG8	novel_not_in_catalog	partial_intron_retention	FALSE	1	1	2	0	2	3	1	0	0	0	3	2	1	1	2	0.28177	0.191094	0.36793	0	1.42764	2.94241	1.62645	0	0	0	1.31196	1.28788	0.344279	0.418177	0.900384	5
2475	CEP170	incomplete-splice_match	internal_fragment	FALSE	7	3	5	5	0	0	1	0	1	0	0	3	7	0	0	1.97239	0.573282	0.919825	1.14085	0	0	1.62645	0	0.553717	0	0	1.93182	2.40995	0	0	5
2477	AKT3	novel_not_in_catalog	novel_exon	FALSE	37	31	46	11	22	18	6	9	18	8	27	16	15	27	32	10.4255	5.92392	8.46239	2.50988	15.704	17.6545	9.75868	19.2188	9.9669	3.96075	11.8077	10.3031	5.16419	11.2908	14.4061	15
2487	CEP170	incomplete-splice_match	5prime_fragment	FALSE	13	5	6	5	1	1	2	1	6	1	4	4	8	8	1	3.66301	0.95547	1.10379	1.14085	0.713818	0.980804	3.25289	2.13542	3.3223	0.495093	1.74928	2.57576	2.75423	3.34542	0.450192	10
2495	AKT3	incomplete-splice_match	internal_fragment	FALSE	2	0	0	0	0	3	0	0	1	6	4	0	4	0	0	0.563539	0	0	0	0	2.94241	0	0	0.553717	2.97056	1.74928	0	1.37712	0	0	4
2499	AKT3	novel_not_in_catalog	novel_exon	FALSE	5	25	20	5	4	2	0	1	1	4	6	1	7	1	0	1.40885	4.77735	3.6793	1.14085	2.85527	1.96161	0	2.13542	0.553717	1.98037	2.62392	0.643941	2.40995	0.418177	0	10
2503	AKT3	novel_not_in_catalog	novel_exon	FALSE	3	9	10	7	0	0	1	0	0	2	2	4	9	3	3	0.845309	1.71985	1.83965	1.59719	0	0	1.62645	0	0	0.990186	0.874642	2.57576	3.09851	1.25453	1.35058	8
2506	AKT3	novel_not_in_catalog	novel_exon	FALSE	3	11	1	1	2	1	0	0	3	0	0	2	1	0	4	0.845309	2.10204	0.183965	0.228171	1.42764	0.980804	0	0	1.66115	0	0	1.28788	0.344279	0	1.80077	5
2510	ENSG00000280906	full-splice_match	mono-exon	FALSE	1	2	11	3	1	1	1	0	3	1	0	0	2	0	4	0.28177	0.382188	2.02361	0.684512	0.713818	0.980804	1.62645	0	1.66115	0.495093	0	0	0.688558	0	1.80077	4
2512	ENSG00000280708	full-splice_match	mono-exon	FALSE	5	3	3	5	2	2	3	0	2	4	3	1	0	3	6	1.40885	0.573282	0.551895	1.14085	1.42764	1.96161	4.87934	0	1.10743	1.98037	1.31196	0.643941	0	1.25453	2.70115	10
2516	ENSG00000280591	full-splice_match	mono-exon	FALSE	3	3	8	3	1	0	1	1	3	4	2	2	2	0	0	0.845309	0.573282	1.47172	0.684512	0.713818	0	1.62645	2.13542	1.66115	1.98037	0.874642	1.28788	0.688558	0	0	6
2527	TRAPPC12	incomplete-splice_match	3prime_fragment	FALSE	7	0	7	4	4	9	5	6	8	10	16	14	9	8	14	1.97239	0	1.28775	0.912682	2.85527	8.82723	8.13224	12.8125	4.42973	4.95093	6.99713	9.01518	3.09851	3.34542	6.30269	13
2528	TRAPPC12	full-splice_match	mono-exon	FALSE	24	15	14	20	2	29	21	17	23	13	42	3	53	5	37	6.76247	2.86641	2.57551	4.56341	1.42764	28.4433	34.1554	36.3022	12.7355	6.43621	18.3675	1.93182	18.2468	2.09089	16.6571	15
2529	ADI1	full-splice_match	alternative_3end	FALSE	85	107	60	63	39	11	149	0	24	0	1	15	44	0	25	23.9504	20.4471	11.0379	14.3747	27.8389	10.7888	242.341	0	13.2892	0	0.437321	9.65912	15.1483	0	11.2548	11
2530	ENSG00000280944	full-splice_match	mono-exon	FALSE	23	41	33	80	25	13	6	4	35	25	29	13	38	38	34	6.4807	7.83486	6.07084	18.2536	17.8454	12.7504	9.75868	8.5417	19.3801	12.3773	12.6823	8.37123	13.0826	15.8907	15.3065	15
2534	FAM240C	full-splice_match	reference_match	FALSE	4	5	3	0	0	3	0	0	0	3	4	7	7	2	4	1.12708	0.95547	0.551895	0	0	2.94241	0	0	0	1.48528	1.74928	4.50759	2.40995	0.836354	1.80077	7
2545	RPS24P9	full-splice_match	mono-exon	FALSE	1	3	6	5	1	7	1	1	1	2	1	4	0	2	2	0.28177	0.573282	1.10379	1.14085	0.713818	6.86563	1.62645	2.13542	0.553717	0.990186	0.437321	2.57576	0	0.836354	0.900384	6
2554	BDH1	full-splice_match	alternative_3end5end	FALSE	5	0	17	0	0	0	1	0	0	32	29	0	0	0	0	1.40885	0	3.1274	0	0	0	1.62645	0	0	15.843	12.6823	0	0	0	0	5
2557	BDH1	full-splice_match	alternative_3end	FALSE	6	5	13	4	4	5	2	3	10	9	13	4	5	3	12	1.69062	0.95547	2.39154	0.912682	2.85527	4.90402	3.25289	6.40627	5.53717	4.45584	5.68517	2.57576	1.7214	1.25453	5.40231	13
2562	ANKRD18DP	full-splice_match	mono-exon	FALSE	4	1	5	2	2	0	2	3	0	4	3	3	2	0	11	1.12708	0.191094	0.919825	0.456341	1.42764	0	3.25289	6.40627	0	1.98037	1.31196	1.93182	0.688558	0	4.95211	8
2565	KCNIP4	full-splice_match	mono-exon	FALSE	27	8	67	18	14	21	13	16	21	74	86	44	39	20	190	7.60778	1.52875	12.3256	4.10707	9.99345	20.5969	21.1438	34.1668	11.628	36.6369	37.6096	28.3334	13.4269	8.36354	85.5365	15
2566	RPL31P25	full-splice_match	mono-exon	FALSE	2	2	6	6	3	7	5	5	1	9	8	11	8	9	18	0.563539	0.382188	1.10379	1.36902	2.14145	6.86563	8.13224	10.6771	0.553717	4.45584	3.49857	7.08335	2.75423	3.76359	8.10346	12
2572	DYNLT2	full-splice_match	mono-exon	FALSE	18	30	14	20	18	15	4	5	16	8	16	5	8	13	13	5.07185	5.73282	2.57551	4.56341	12.8487	14.7121	6.50579	10.6771	8.85947	3.96075	6.99713	3.21971	2.75423	5.4363	5.8525	15
2577	ERMARD	incomplete-splice_match	3prime_fragment	FALSE	105	0	0	0	0	0	0	20	4	3	0	55	0	0	0	29.5858	0	0	0	0	0	0	42.7085	2.21487	1.48528	0	35.4168	0	0	0	5
2578	ENSG00000281833	full-splice_match	mono-exon	FALSE	2	2	3	2	1	0	0	0	4	3	3	3	1	3	3	0.563539	0.382188	0.551895	0.456341	0.713818	0	0	0	2.21487	1.48528	1.31196	1.93182	0.344279	1.25453	1.35058	6
2588	FAM120B	incomplete-splice_match	5prime_fragment	FALSE	10	14	7	7	3	4	1	3	5	4	4	4	13	17	2	2.8177	2.67532	1.28775	1.59719	2.14145	3.92321	1.62645	6.40627	2.76858	1.98037	1.74928	2.57576	4.47563	7.10901	0.900384	14
2590	FAM120B	incomplete-splice_match	3prime_fragment	FALSE	8	1	6	0	20	10	2	0	2	16	18	2	7	19	18	2.25416	0.191094	1.10379	0	14.2764	9.80804	3.25289	0	1.10743	7.92149	7.87177	1.28788	2.40995	7.94537	8.10346	12
2595	THEMIS	incomplete-splice_match	internal_fragment	FALSE	4	2	4	0	1	0	0	0	2	0	9	0	4	2	2	1.12708	0.382188	0.73586	0	0.713818	0	0	0	1.10743	0	3.93589	0	1.37712	0.836354	0.900384	4
2606	PTPRK	incomplete-splice_match	3prime_fragment	FALSE	3	0	0	0	0	0	0	0	3	18	1	2	15	17	2	0.845309	0	0	0	0	0	0	0	1.66115	8.91168	0.437321	1.28788	5.16419	7.10901	0.900384	5
2621	PTPRK	full-splice_match	reference_match	FALSE	20	29	34	21	2	0	4	1	19	10	4	7	1	13	11	5.63539	5.54173	6.25481	4.79158	1.42764	0	6.50579	2.13542	10.5206	4.95093	1.74928	4.50759	0.344279	5.4363	4.95211	13
2635	EPHB6	novel_not_in_catalog	novel_exon	FALSE	9	18	19	5	5	3	0	0	1	13	13	4	6	5	2	2.53593	3.43969	3.49533	1.14085	3.56909	2.94241	0	0	0.553717	6.43621	5.68517	2.57576	2.06567	2.09089	0.900384	11
2637	EPHB6	incomplete-splice_match	5prime_fragment	FALSE	1	2	3	2	4	7	2	0	3	2	5	3	6	4	3	0.28177	0.382188	0.551895	0.456341	2.85527	6.86563	3.25289	0	1.66115	0.990186	2.1866	1.93182	2.06567	1.67271	1.35058	9
2638	EPHB6	novel_in_catalog	combination_of_known_splicesites	FALSE	12	13	7	18	9	5	4	3	3	10	28	13	29	3	6	3.38124	2.48422	1.28775	4.10707	6.42436	4.90402	6.50579	6.40627	1.66115	4.95093	12.245	8.37123	9.98409	1.25453	2.70115	15
2639	EPHB6	incomplete-splice_match	5prime_fragment	FALSE	143	158	278	125	81	49	31	31	38	115	183	97	172	107	64	40.2931	30.1929	51.1422	28.5213	57.8192	48.0594	50.4199	66.1982	21.0412	56.9357	80.0297	62.4623	59.216	44.745	28.8123	15
2640	EPHB6	novel_in_catalog	combination_of_known_splicesites	FALSE	6	2	2	2	1	2	1	0	2	4	9	1	4	2	1	1.69062	0.382188	0.36793	0.456341	0.713818	1.96161	1.62645	0	1.10743	1.98037	3.93589	0.643941	1.37712	0.836354	0.450192	7
2648	NAPEPLD	full-splice_match	alternative_3end5end	FALSE	49	62	76	60	4	0	1	1	28	9	6	12	3	9	12	13.8067	11.8478	13.9813	13.6902	2.85527	0	1.62645	2.13542	15.5041	4.45584	2.62392	7.72729	1.03284	3.76359	5.40231	14
2649	NAPEPLD	incomplete-splice_match	5prime_fragment	FALSE	3	4	9	2	9	0	1	0	0	0	1	1	4	3	0	0.845309	0.764376	1.65568	0.456341	6.42436	0	1.62645	0	0	0	0.437321	0.643941	1.37712	1.25453	0	5
2651	NAPEPLD	incomplete-splice_match	5prime_fragment	FALSE	1	13	14	28	6	0	0	3	4	9	7	1	10	0	8	0.28177	2.48422	2.57551	6.38878	4.28291	0	0	6.40627	2.21487	4.45584	3.06125	0.643941	3.44279	0	3.60154	10
2652	ENSG00000282463	full-splice_match	mono-exon	FALSE	4	6	0	1	2	1	0	8	3	2	1	1	4	2	1	1.12708	1.14656	0	0.228171	1.42764	0.980804	0	17.0834	1.66115	0.990186	0.437321	0.643941	1.37712	0.836354	0.450192	6
2655	NAPEPLD	novel_not_in_catalog	novel_exon	FALSE	8	0	0	0	0	0	0	0	9	0	6	0	9	0	0	2.25416	0	0	0	0	0	0	0	4.98345	0	2.62392	0	3.09851	0	0	4
2657	NAPEPLD	incomplete-splice_match	5prime_fragment	FALSE	5	60	0	8	0	0	0	0	8	0	4	1	0	8	3	1.40885	11.4656	0	1.82536	0	0	0	0	4.42973	0	1.74928	0.643941	0	3.34542	1.35058	7
2660	ARMC10	incomplete-splice_match	3prime_fragment	FALSE	17	43	5	5	0	0	0	0	12	3	3	15	11	2	22	4.79008	8.21705	0.919825	1.14085	0	0	0	0	6.6446	1.48528	1.31196	9.65912	3.78707	0.836354	9.90423	9
2662	ARMC10	full-splice_match	alternative_3end	FALSE	39	37	34	0	1	0	0	0	0	0	0	0	4	19	1	10.989	7.07048	6.25481	0	0.713818	0	0	0	0	0	0	0	1.37712	7.94537	0.450192	5
2665	CNTNAP2	full-splice_match	alternative_5end	FALSE	29	0	69	0	21	0	0	0	25	0	0	0	78	0	0	8.17132	0	12.6936	0	14.9902	0	0	0	13.8429	0	0	0	26.8538	0	0	5
2669	CNTNAP2	full-splice_match	alternative_3end	FALSE	3	0	13	0	1	0	0	7	3	0	18	0	3	1	0	0.845309	0	2.39154	0	0.713818	0	0	14.948	1.66115	0	7.87177	0	1.03284	0.418177	0	5
2670	CNTNAP2	incomplete-splice_match	3prime_fragment	FALSE	7	0	0	0	4	0	0	0	0	7	26	0	0	0	0	1.97239	0	0	0	2.85527	0	0	0	0	3.46565	11.3703	0	0	0	0	4
2671	CNTNAP2	incomplete-splice_match	3prime_fragment	FALSE	1	0	9	0	0	10	9	0	12	2	3	0	14	5	0	0.28177	0	1.65568	0	0	9.80804	14.638	0	6.6446	0.990186	1.31196	0	4.81991	2.09089	0	7
2672	DTX2	full-splice_match	alternative_3end5end	FALSE	17	24	27	1	9	0	0	0	0	0	0	0	0	15	0	4.79008	4.58626	4.96705	0.228171	6.42436	0	0	0	0	0	0	0	0	6.27266	0	5
2676	LINC03009	incomplete-splice_match	5prime_fragment	FALSE	4	12	10	1	5	7	2	4	15	3	5	4	1	10	10	1.12708	2.29313	1.83965	0.228171	3.56909	6.86563	3.25289	8.5417	8.30575	1.48528	2.1866	2.57576	0.344279	4.18177	4.50192	13
2677	POMZP3	full-splice_match	alternative_5end	FALSE	12	78	81	108	18	0	0	0	0	0	0	0	0	0	0	3.38124	14.9053	14.9012	24.6424	12.8487	0	0	0	0	0	0	0	0	0	0	5
2680	POMZP3	incomplete-splice_match	5prime_fragment	FALSE	17	7	9	4	10	0	0	2	4	11	11	6	8	10	5	4.79008	1.33766	1.65568	0.912682	7.13818	0	0	4.27085	2.21487	5.44602	4.81053	3.86365	2.75423	4.18177	2.25096	12
2694	ZNF251	incomplete-splice_match	intron_retention	FALSE	2	0	4	1	4	4	9	0	2	1	5	3	2	1	11	0.563539	0	0.73586	0.228171	2.85527	3.92321	14.638	0	1.10743	0.495093	2.1866	1.93182	0.688558	0.418177	4.95211	7
2696	ZC3H3	incomplete-splice_match	5prime_fragment	FALSE	1	3	2	1	2	0	1	0	0	0	0	2	2	1	3	0.28177	0.573282	0.36793	0.228171	1.42764	0	1.62645	0	0	0	0	1.28788	0.688558	0.418177	1.35058	4
2698	NAPRT	full-splice_match	alternative_5end	FALSE	5	3	0	3	14	0	4	1	2	1	1	0	1	2	0	1.40885	0.573282	0	0.684512	9.99345	0	6.50579	2.13542	1.10743	0.495093	0.437321	0	0.344279	0.836354	0	5
2700	NAPRT	full-splice_match	reference_match	FALSE	3	25	16	0	0	0	0	0	0	0	6	0	0	16	0	0.845309	4.77735	2.94344	0	0	0	0	0	0	0	2.62392	0	0	6.69083	0	4
2701	EEF1D	full-splice_match	alternative_5end	FALSE	194	435	328	46	9	54	0	0	24	132	180	13	49	0	13	54.6633	83.1259	60.3405	10.4958	6.42436	52.9634	0	0	13.2892	65.3523	78.7177	8.37123	16.8697	0	5.8525	12
2708	EEF1D	full-splice_match	reference_match	FALSE	35	110	59	29	13	0	0	25	18	8	1	76	10	18	117	9.86194	21.0204	10.8539	6.61695	9.27963	0	0	53.3856	9.9669	3.96075	0.437321	48.9395	3.44279	7.52719	52.6725	12
2712	TIGD5	full-splice_match	mono-exon	FALSE	12	30	11	59	14	7	5	5	14	28	30	25	28	19	24	3.38124	5.73282	2.02361	13.4621	9.99345	6.86563	8.13224	10.6771	7.75203	13.8626	13.1196	16.0985	9.63982	7.94537	10.8046	15
2714	GFUS	full-splice_match	reference_match	FALSE	22	11	9	0	0	0	15	0	18	24	0	0	2	2	0	6.19893	2.10204	1.65568	0	0	0	24.3967	0	9.9669	11.8822	0	0	0.688558	0.836354	0	6
2715	ZNF623	full-splice_match	mono-exon	FALSE	14	7	15	44	12	12	18	19	59	14	34	20	49	57	29	3.94478	1.33766	2.75947	10.0395	8.56581	11.7696	29.2761	40.5731	32.6693	6.9313	14.8689	12.8788	16.8697	23.8361	13.0556	15
2723	IQANK1	full-splice_match	mono-exon	FALSE	1	0	0	4	0	2	1	0	2	4	3	1	1	1	0	0.28177	0	0	0.912682	0	1.96161	1.62645	0	1.10743	1.98037	1.31196	0.643941	0.344279	0.418177	0	5
2734	LY6E	full-splice_match	alternative_3end	FALSE	130	251	242	327	97	11	5	0	8	338	80	201	414	30	173	36.6301	47.9646	44.5195	74.6118	69.2403	10.7888	8.13224	0	4.42973	167.341	34.9857	129.432	142.532	12.5453	77.8832	14
2737	LY6E	incomplete-splice_match	5prime_fragment	FALSE	2	3	0	0	1	0	1	0	0	4	3	0	3	4	0	0.563539	0.573282	0	0	0.713818	0	1.62645	0	0	1.98037	1.31196	0	1.03284	1.67271	0	5
2746	LY6H	full-splice_match	reference_match	FALSE	228	12	22	2	2	1	2	2	2	2	0	1	9	9	3	64.2435	2.29313	4.04723	0.456341	1.42764	0.980804	3.25289	4.27085	1.10743	0.990186	0	0.643941	3.09851	3.76359	1.35058	10
2747	LY6H	full-splice_match	reference_match	FALSE	6	3	6	0	0	0	3	1	1	0	1	0	3	2	0	1.69062	0.573282	1.10379	0	0	0	4.87934	2.13542	0.553717	0	0.437321	0	1.03284	0.836354	0	5
2748	LY6H	incomplete-splice_match	intron_retention	FALSE	9	8	21	3	3	2	3	6	0	6	7	6	11	20	1	2.53593	1.52875	3.86326	0.684512	2.14145	1.96161	4.87934	12.8125	0	2.97056	3.06125	3.86365	3.78707	8.36354	0.450192	12
2752	LY6H	full-splice_match	alternative_5end	FALSE	200	2	212	594	199	138	296	9	231	543	698	422	703	254	34	56.3539	0.382188	39.0006	135.533	142.05	135.351	481.428	19.2188	127.909	268.836	305.25	271.743	242.028	106.217	15.3065	14
2755	LY6H	novel_not_in_catalog	partial_intron_retention	FALSE	15	7	299	4	5	0	3	0	4	6	6	3	8	2	1	4.22655	1.33766	55.0055	0.912682	3.56909	0	4.87934	0	2.21487	2.97056	2.62392	1.93182	2.75423	0.836354	0.450192	10
2758	LY6H	novel_in_catalog	combination_of_known_splicesites	FALSE	6	4	2	0	2	0	2	0	0	2	3	3	2	0	1	1.69062	0.764376	0.36793	0	1.42764	0	3.25289	0	0	0.990186	1.31196	1.93182	0.688558	0	0.450192	5
2760	LY6H	incomplete-splice_match	intron_retention	FALSE	1	0	12	1	5	5	0	10	0	0	5	0	1	1	1	0.28177	0	2.20758	0.228171	3.56909	4.90402	0	21.3542	0	0	2.1866	0	0.344279	0.418177	0.450192	5
2762	LY6H	full-splice_match	reference_match	FALSE	12	8	1	0	1	0	9	0	0	6	0	0	3	3	427	3.38124	1.52875	0.183965	0	0.713818	0	14.638	0	0	2.97056	0	0	1.03284	1.25453	192.232	7
2765	ENSG00000282245	full-splice_match	mono-exon	FALSE	4	4	7	4	3	6	0	6	2	0	4	4	4	3	8	1.12708	0.764376	1.28775	0.912682	2.14145	5.88482	0	12.8125	1.10743	0	1.74928	2.57576	1.37712	1.25453	3.60154	11
2769	ARHGEF10	incomplete-splice_match	5prime_fragment	FALSE	16	20	30	19	5	2	1	1	12	1	10	3	4	5	4	4.50831	3.82188	5.51895	4.33524	3.56909	1.96161	1.62645	2.13542	6.6446	0.495093	4.37321	1.93182	1.37712	2.09089	1.80077	14
2777	KBTBD11	novel_not_in_catalog	Alt3	FALSE	23	0	115	1	23	0	0	0	41	52	61	0	0	0	82	6.4807	0	21.156	0.228171	16.4178	0	0	0	22.7024	25.7448	26.6766	0	0	0	36.9158	7
2778	KBTBD11	novel_in_catalog	combination_of_known_splicesites	FALSE	1	0	7	5	9	0	3	2	2	3	4	0	3	6	5	0.28177	0	1.28775	1.14085	6.42436	0	4.87934	4.27085	1.10743	1.48528	1.74928	0	1.03284	2.50906	2.25096	11
2784	MYOM2	full-splice_match	alternative_3end	FALSE	1	2	24	53	65	0	42	0	0	0	0	0	0	0	0	0.28177	0.382188	4.41516	12.093	46.3981	0	68.3108	0	0	0	0	0	0	0	0	4
2787	ADAM9	full-splice_match	reference_match	FALSE	24	106	71	96	9	0	0	0	32	8	3	0	10	35	5	6.76247	20.256	13.0615	21.9044	6.42436	0	0	0	17.7189	3.96075	1.31196	0	3.44279	14.6362	2.25096	11
2792	PLPPR1	incomplete-splice_match	3prime_fragment	FALSE	47	128	55	0	10	0	0	3	0	60	0	0	0	64	0	13.2432	24.46	10.1181	0	7.13818	0	0	6.40627	0	29.7056	0	0	0	26.7633	0	7
2793	PLPPR1	incomplete-splice_match	5prime_fragment	FALSE	5	5	7	6	2	4	0	2	10	2	5	3	1	3	5	1.40885	0.95547	1.28775	1.36902	1.42764	3.92321	0	4.27085	5.53717	0.990186	2.1866	1.93182	0.344279	1.25453	2.25096	11
2798	PLPPR1	incomplete-splice_match	5prime_fragment	FALSE	4	12	5	0	0	1	0	0	7	0	0	7	4	0	0	1.12708	2.29313	0.919825	0	0	0.980804	0	0	3.87602	0	0	4.50759	1.37712	0	0	5
2799	PLPPR1	incomplete-splice_match	5prime_fragment	FALSE	6	2	20	1	0	0	0	0	3	0	0	2	0	1	2	1.69062	0.382188	3.6793	0.228171	0	0	0	0	1.66115	0	0	1.28788	0	0.418177	0.900384	4
2805	DLG5-AS1	novel_not_in_catalog	novel_exon	FALSE	4	5	14	3	0	1	0	4	1	6	6	4	7	3	0	1.12708	0.95547	2.57551	0.684512	0	0.980804	0	8.5417	0.553717	2.97056	2.62392	2.57576	2.40995	1.25453	0	8
2809	CDKN1C	full-splice_match	alternative_3end5end	FALSE	206	73	454	39	18	15	0	2	257	5	18	57	200	10	79	58.0446	13.9499	83.5201	8.89865	12.8487	14.7121	0	4.27085	142.305	2.47547	7.87177	36.7046	68.8558	4.18177	35.5652	14
2810	CDKN1C	full-splice_match	alternative_3end5end	FALSE	48	1	11	0	6	8	0	2	26	85	49	1	57	9	29	13.5249	0.191094	2.02361	0	4.28291	7.84643	0	4.27085	14.3966	42.0829	21.4287	0.643941	19.6239	3.76359	13.0556	11
2811	CDKN1C	full-splice_match	alternative_3end	FALSE	7	53	23	186	40	0	0	0	2	0	7	14	0	34	3	1.97239	10.128	4.23119	42.4397	28.5527	0	0	0	1.10743	0	3.06125	9.01518	0	14.218	1.35058	10
2815	PHLDA2	full-splice_match	alternative_5end	FALSE	38	2	30	13	16	3	2	3	7	17	22	11	6	25	31	10.7072	0.382188	5.51895	2.96622	11.4211	2.94241	3.25289	6.40627	3.87602	8.41658	9.62106	7.08335	2.06567	10.4544	13.956	14
2821	NAP1L4	incomplete-splice_match	5prime_fragment	FALSE	14	48	31	30	7	1	0	0	4	5	7	7	13	8	6	3.94478	9.17252	5.70291	6.84512	4.99672	0.980804	0	0	2.21487	2.47547	3.06125	4.50759	4.47563	3.34542	2.70115	12
2825	NAP1L4	incomplete-splice_match	5prime_fragment	FALSE	40	63	60	42	6	2	0	1	10	8	8	16	8	13	4	11.2708	12.0389	11.0379	9.58316	4.28291	1.96161	0	2.13542	5.53717	3.96075	3.49857	10.3031	2.75423	5.4363	1.80077	14
2827	NAP1L4	incomplete-splice_match	5prime_fragment	FALSE	6	5	10	4	3	0	0	0	0	0	1	1	4	3	1	1.69062	0.95547	1.83965	0.912682	2.14145	0	0	0	0	0	0.437321	0.643941	1.37712	1.25453	0.450192	5
2830	CARS1	incomplete-splice_match	intron_retention	FALSE	30	10	1	5	1	1	1	18	0	1	2	4	2	1	6	8.45309	1.91094	0.183965	1.14085	0.713818	0.980804	1.62645	38.4376	0	0.495093	0.874642	2.57576	0.688558	0.418177	2.70115	7
2834	CARS1	incomplete-splice_match	3prime_fragment	FALSE	8	0	3	2	1	0	1	0	1	0	7	3	1	1	1	2.25416	0	0.551895	0.456341	0.713818	0	1.62645	0	0.553717	0	3.06125	1.93182	0.344279	0.418177	0.450192	4
2835	CARS1	incomplete-splice_match	3prime_fragment	FALSE	1	4	0	0	0	0	19	3	2	1	6	42	4	0	2	0.28177	0.764376	0	0	0	0	30.9025	6.40627	1.10743	0.495093	2.62392	27.0455	1.37712	0	0.900384	6
2837	CARS1	full-splice_match	mono-exon	FALSE	2	3	6	5	2	3	2	2	6	2	7	6	2	5	4	0.563539	0.573282	1.10379	1.14085	1.42764	2.94241	3.25289	4.27085	3.3223	0.990186	3.06125	3.86365	0.688558	2.09089	1.80077	11
2848	RASSF7	incomplete-splice_match	intron_retention	FALSE	17	14	14	17	25	0	0	0	2	5	0	0	0	16	0	4.79008	2.67532	2.57551	3.8789	17.8454	0	0	0	1.10743	2.47547	0	0	0	6.69083	0	8
2850	PHRF1	incomplete-splice_match	5prime_fragment	FALSE	9	2	11	0	0	9	0	0	6	0	8	16	5	6	6	2.53593	0.382188	2.02361	0	0	8.82723	0	0	3.3223	0	3.49857	10.3031	1.7214	2.50906	2.70115	9
2859	RNH1	full-splice_match	alternative_5end	FALSE	6	5	4	4	0	4	1	1	4	3	1	3	2	1	3	1.69062	0.95547	0.73586	0.912682	0	3.92321	1.62645	2.13542	2.21487	1.48528	0.437321	1.93182	0.688558	0.418177	1.35058	8
2861	RNH1	novel_in_catalog	combination_of_known_splicesites	FALSE	6	12	7	2	0	1	0	0	0	101	0	1	0	0	0	1.69062	2.29313	1.28775	0.456341	0	0.980804	0	0	0	50.0044	0	0.643941	0	0	0	4
2864	RNH1	full-splice_match	alternative_5end	FALSE	6	22	13	6	9	1	0	0	2	0	3	1	1	4	2	1.69062	4.20407	2.39154	1.36902	6.42436	0.980804	0	0	1.10743	0	1.31196	0.643941	0.344279	1.67271	0.900384	8
2872	RNH1	full-splice_match	reference_match	FALSE	9	15	26	10	40	41	11	0	194	1	1	2	3	3	2	2.53593	2.86641	4.78309	2.28171	28.5527	40.213	17.8909	0	107.421	0.495093	0.437321	1.28788	1.03284	1.25453	0.900384	11
2873	RNH1	full-splice_match	alternative_5end	FALSE	8	11	13	0	1	0	0	0	5	0	91	1	1	3	0	2.25416	2.10204	2.39154	0	0.713818	0	0	0	2.76858	0	39.7962	0.643941	0.344279	1.25453	0	6
2875	HRAS	full-splice_match	alternative_3end5end	FALSE	102	69	157	15	5	28	22	8	53	90	148	76	14	93	71	28.7405	13.1855	28.8825	3.42256	3.56909	27.4625	35.7818	17.0834	29.347	44.5584	64.7235	48.9395	4.81991	38.8905	31.9636	15
2881	HRAS	full-splice_match	reference_match	FALSE	6	83	13	6	0	0	3	1	0	1	3	0	0	5	0	1.69062	15.8608	2.39154	1.36902	0	0	4.87934	2.13542	0	0.495093	1.31196	0	0	2.09089	0	8
2885	HRAS	full-splice_match	reference_match	FALSE	3	9	4	0	2	4	0	16	0	0	10	0	0	3	10	0.845309	1.71985	0.73586	0	1.42764	3.92321	0	34.1668	0	0	4.37321	0	0	1.25453	4.50192	7
2886	HRAS	full-splice_match	reference_match	FALSE	8	0	11	0	8	0	0	0	0	1	2	0	18	2	0	2.25416	0	2.02361	0	5.71054	0	0	0	0	0.495093	0.874642	0	6.19702	0.836354	0	4
2893	DEAF1	full-splice_match	alternative_5end	FALSE	28	119	96	196	5	7	43	28	94	192	270	6	324	73	158	7.88955	22.7402	17.6606	44.7214	3.56909	6.86563	69.9372	59.7919	52.0494	95.0579	118.077	3.86365	111.546	30.5269	71.1304	15
2894	CCDC92	full-splice_match	reference_match	FALSE	2	0	3	2	0	0	0	1	3	1	7	0	5	7	276	0.563539	0	0.551895	0.456341	0	0	0	2.13542	1.66115	0.495093	3.06125	0	1.7214	2.92724	124.253	6
2895	CCDC92	full-splice_match	alternative_3end	FALSE	102	0	0	6	0	1	3	1	225	5	526	3	528	1	0	28.7405	0	0	1.36902	0	0.980804	4.87934	2.13542	124.586	2.47547	230.031	1.93182	181.779	0.418177	0	9
2900	TUBGCP3	incomplete-splice_match	3prime_fragment	FALSE	2	4	0	18	28	1	3	0	49	50	1	0	70	34	0	0.563539	0.764376	0	4.10707	19.9869	0.980804	4.87934	0	27.1321	24.7547	0.437321	0	24.0995	14.218	0	7
2902	ENSG00000282241	full-splice_match	mono-exon	FALSE	2	1	4	4	0	1	0	0	5	4	3	4	3	1	3	0.563539	0.191094	0.73586	0.912682	0	0.980804	0	0	2.76858	1.98037	1.31196	2.57576	1.03284	0.418177	1.35058	6
2906	TMEM179	full-splice_match	mono-exon	FALSE	55	73	83	122	86	61	49	27	53	138	199	145	259	71	153	15.4973	13.9499	15.2691	27.8368	61.3883	59.829	79.6959	57.6565	29.347	68.3229	87.0268	93.3715	89.1683	29.6906	68.8794	15
2911	CHGA	incomplete-splice_match	5prime_fragment	FALSE	1	0	0	1	3	0	2	0	1	0	1	1	2	3	3	0.28177	0	0	0.228171	2.14145	0	3.25289	0	0.553717	0	0.437321	0.643941	0.688558	1.25453	1.35058	4
2912	CHGA	incomplete-splice_match	5prime_fragment	FALSE	1	1	4	0	16	4	0	0	4	0	1	6	2	3	3	0.28177	0.191094	0.73586	0	11.4211	3.92321	0	0	2.21487	0	0.437321	3.86365	0.688558	1.25453	1.35058	6
2914	CHGA	incomplete-splice_match	5prime_fragment	FALSE	26	12	19	7	17	1	4	0	2	3	16	5	23	12	5	7.32601	2.29313	3.49533	1.59719	12.1349	0.980804	6.50579	0	1.10743	1.48528	6.99713	3.21971	7.91842	5.01813	2.25096	13
2923	CHGA	incomplete-splice_match	5prime_fragment	FALSE	5	1	11	6	5	0	3	0	1	5	10	4	5	4	2	1.40885	0.191094	2.02361	1.36902	3.56909	0	4.87934	0	0.553717	2.47547	4.37321	2.57576	1.7214	1.67271	0.900384	10
2924	CHGA	full-splice_match	alternative_5end	FALSE	11	21	131	729	348	73	89	43	0	436	0	277	903	107	79	3.09947	4.01298	24.0994	166.336	248.409	71.5987	144.754	91.8232	0	215.861	0	178.372	310.884	44.745	35.5652	13
2927	LYSET	full-splice_match	alternative_3end	FALSE	78	66	97	49	27	16	6	2	43	19	30	30	27	47	28	21.978	12.6122	17.8446	11.1804	19.2731	15.6929	9.75868	4.27085	23.8098	9.40677	13.1196	19.3182	9.29554	19.6543	12.6054	15
2929	LYSET	full-splice_match	reference_match	FALSE	4	5	10	0	1	0	0	0	4	1	1	2	2	2	1	1.12708	0.95547	1.83965	0	0.713818	0	0	0	2.21487	0.495093	0.437321	1.28788	0.688558	0.836354	0.450192	4
2932	UNC79	incomplete-splice_match	5prime_fragment	FALSE	2	1	1	0	1	3	1	1	1	1	1	1	3	2	0	0.563539	0.191094	0.183965	0	0.713818	2.94241	1.62645	2.13542	0.553717	0.495093	0.437321	0.643941	1.03284	0.836354	0	4
2937	UBR7	full-splice_match	alternative_3end5end	FALSE	6	8	9	0	0	0	0	0	1	1	1	0	3	6	0	1.69062	1.52875	1.65568	0	0	0	0	0	0.553717	0.495093	0.437321	0	1.03284	2.50906	0	5
2950	ENSG00000281396	full-splice_match	mono-exon	FALSE	1	6	1	6	1	1	0	0	3	4	0	0	1	2	0	0.28177	1.14656	0.183965	1.36902	0.713818	0.980804	0	0	1.66115	1.98037	0	0	0.344279	0.836354	0	4
2953	ITPK1	incomplete-splice_match	internal_fragment	FALSE	3	5	6	0	5	4	0	0	0	0	0	0	0	4	1	0.845309	0.95547	1.10379	0	3.56909	3.92321	0	0	0	0	0	0	0	1.67271	0.450192	4
2955	MOAP1	full-splice_match	alternative_3end	FALSE	172	283	33	9	104	92	1	4	4	4	13	201	3	239	4	48.4644	54.0796	6.07084	2.05354	74.237	90.2339	1.62645	8.5417	2.21487	1.98037	5.68517	129.432	1.03284	99.9443	1.80077	15
2956	GON7	full-splice_match	reference_match	FALSE	9	14	26	24	4	0	4	4	14	12	18	3	32	22	15	2.53593	2.67532	4.78309	5.47609	2.85527	0	6.50579	8.5417	7.75203	5.94112	7.87177	1.93182	11.0169	9.1999	6.75288	14
2960	BTBD7	incomplete-splice_match	5prime_fragment	FALSE	18	36	30	28	7	8	2	4	8	8	8	10	11	6	2	5.07185	6.87939	5.51895	6.38878	4.99672	7.84643	3.25289	8.5417	4.42973	3.96075	3.49857	6.43941	3.78707	2.50906	0.900384	14
2965	PRIMA1	novel_not_in_catalog	novel_exon	FALSE	4	9	22	3	4	0	0	0	5	0	0	2	0	0	0	1.12708	1.71985	4.04723	0.684512	2.85527	0	0	0	2.76858	0	0	1.28788	0	0	0	6
2972	DDX24	incomplete-splice_match	3prime_fragment	FALSE	4	3	376	11	127	109	17	70	4	438	430	1	1	2	8	1.12708	0.573282	69.1708	2.50988	90.6548	106.908	27.6496	149.48	2.21487	216.851	188.048	0.643941	0.344279	0.836354	3.60154	11
2974	DDX24	incomplete-splice_match	internal_fragment	FALSE	5	2	0	11	0	1	0	0	0	0	2	2	4	0	2	1.40885	0.382188	0	2.50988	0	0.980804	0	0	0	0	0.874642	1.28788	1.37712	0	0.900384	4
2976	DDX24	incomplete-splice_match	5prime_fragment	FALSE	6	25	21	0	6	0	0	0	0	0	14	0	0	7	0	1.69062	4.77735	3.86326	0	4.28291	0	0	0	0	0	6.12249	0	0	2.92724	0	6
2978	DDX24	incomplete-splice_match	intron_retention	FALSE	69	66	0	835	0	0	0	0	0	4	0	0	561	0	0	19.4421	12.6122	0	190.522	0	0	0	0	0	1.98037	0	0	193.141	0	0	5
2979	DDX24	incomplete-splice_match	5prime_fragment	FALSE	17	26	23	9	5	1	0	0	0	7	0	6	0	1	3	4.79008	4.96845	4.23119	2.05354	3.56909	0.980804	0	0	0	3.46565	0	3.86365	0	0.418177	1.35058	8
2981	DDX24	full-splice_match	alternative_3end	FALSE	198	486	791	305	172	99	70	50	176	202	280	295	306	298	165	55.7904	92.8717	145.516	69.592	122.777	97.0996	113.851	106.771	97.4541	100.009	122.45	189.963	105.349	124.617	74.2817	15
2986	IFI27L1	novel_in_catalog	combination_of_known_junctions	FALSE	2	3	5	6	0	0	0	0	2	0	0	2	3	2	0	0.563539	0.573282	0.919825	1.36902	0	0	0	0	1.10743	0	0	1.28788	1.03284	0.836354	0	4
2992	IFI27	novel_in_catalog	combination_of_known_junctions	FALSE	25	10	41	4	8	1	1	2	5	0	33	4	38	8	15	7.04424	1.91094	7.54256	0.912682	5.71054	0.980804	1.62645	4.27085	2.76858	0	14.4316	2.57576	13.0826	3.34542	6.75288	12
2993	IFI27	full-splice_match	reference_match	FALSE	16	3	18	0	15	0	2	0	5	0	21	4	10	0	0	4.50831	0.573282	3.31137	0	10.7073	0	3.25289	0	2.76858	0	9.18374	2.57576	3.44279	0	0	8
2994	IFI27	full-splice_match	reference_match	FALSE	34	4	17	3	3	0	0	0	1	1	18	0	11	1	1	9.58017	0.764376	3.1274	0.684512	2.14145	0	0	0	0.553717	0.495093	7.87177	0	3.78707	0.418177	0.450192	5
2996	IFI27L1	full-splice_match	reference_match	FALSE	40	32	49	17	2	1	0	7	11	16	6	9	27	6	14	11.2708	6.11501	9.01428	3.8789	1.42764	0.980804	0	14.948	6.09088	7.92149	2.62392	5.79547	9.29554	2.50906	6.30269	13
3002	IFI27L2	full-splice_match	reference_match	FALSE	529	425	591	250	22	17	8	6	136	75	47	77	105	164	84	149.056	81.215	108.723	57.0426	15.704	16.6737	13.0116	12.8125	75.3055	37.132	20.5541	49.5835	36.1493	68.5811	37.8161	15
3003	IFI27L2	novel_in_catalog	combination_of_known_junctions,intron_retention	FALSE	1	12	7	8	35	18	0	8	8	1	2	2	9	5	4	0.28177	2.29313	1.28775	1.82536	24.9836	17.6545	0	17.0834	4.42973	0.495093	0.874642	1.28788	3.09851	2.09089	1.80077	11
3009	IFI27L2	full-splice_match	alternative_5end	FALSE	32	33	47	22	4	3	2	1	5	10	38	14	8	15	8	9.01663	6.30611	8.64635	5.01975	2.85527	2.94241	3.25289	2.13542	2.76858	4.95093	16.6182	9.01518	2.75423	6.27266	3.60154	15
3015	PPP4R4	incomplete-splice_match	5prime_fragment	FALSE	2	2	1	0	1	1	3	3	0	1	1	0	2	5	5	0.563539	0.382188	0.183965	0	0.713818	0.980804	4.87934	6.40627	0	0.495093	0.437321	0	0.688558	2.09089	2.25096	4
3018	SERPINA1	incomplete-splice_match	3prime_fragment	FALSE	5	0	26	11	0	0	0	0	2	0	5	0	0	3	5	1.40885	0	4.78309	2.50988	0	0	0	0	1.10743	0	2.1866	0	0	1.25453	2.25096	7
3029	B2M	full-splice_match	alternative_3end	FALSE	235	144	83	14	4	1	0	0	652	3	10	278	751	330	152	66.2159	27.5176	15.2691	3.19439	2.85527	0.980804	0	0	361.023	1.48528	4.37321	179.016	258.554	137.998	68.4292	12
3030	B2M	incomplete-splice_match	5prime_fragment	FALSE	85	94	171	72	12	2	0	2	20	6	41	15	33	30	23	23.9504	17.9628	31.458	16.4283	8.56581	1.96161	0	4.27085	11.0743	2.97056	17.9302	9.65912	11.3612	12.5453	10.3544	14
3036	TRIM69	full-splice_match	alternative_3end5end	FALSE	10	35	76	2	4	0	0	0	3	1	3	2	32	18	0	2.8177	6.68829	13.9813	0.456341	2.85527	0	0	0	1.66115	0.495093	1.31196	1.28788	11.0169	7.52719	0	9
3039	ADAMTS7P1	incomplete-splice_match	3prime_fragment	FALSE	1	0	0	14	1	0	0	2	0	21	34	19	19	0	1	0.28177	0	0	3.19439	0.713818	0	0	4.27085	0	10.397	14.8689	12.2349	6.5413	0	0.450192	6
3041	UBE2Q2P2	novel_not_in_catalog	Alt5	FALSE	13	0	0	0	23	12	7	14	0	0	0	5	1	0	0	3.66301	0	0	0	16.4178	11.7696	11.3851	29.8959	0	0	0	3.21971	0.344279	0	0	6
3050	ENSG00000273673	full-splice_match	mono-exon	FALSE	349	1051	1405	418	41	51	9	15	125	137	133	78	276	394	192	98.3376	200.84	258.471	95.3753	29.2665	50.021	14.638	32.0314	69.2146	67.8278	58.1637	50.2274	95.021	164.762	86.4369	15
3051	RPS17	full-splice_match	reference_match	FALSE	698	737	940	585	68	60	36	37	232	192	267	166	293	390	213	196.675	140.836	172.927	133.48	48.5396	58.8482	58.5521	79.0107	128.462	95.0579	116.765	106.894	100.874	163.089	95.8909	15
3055	CPEB1	incomplete-splice_match	3prime_fragment	FALSE	1	6	51	0	0	0	0	7	20	0	18	19	1	0	1	0.28177	1.14656	9.38221	0	0	0	0	14.948	11.0743	0	7.87177	12.2349	0.344279	0	0.450192	6
3059	RPS17	full-splice_match	reference_match	FALSE	25	27	29	16	3	1	3	3	9	10	9	8	15	39	9	7.04424	5.15954	5.33498	3.65073	2.14145	0.980804	4.87934	6.40627	4.98345	4.95093	3.93589	5.15153	5.16419	16.3089	4.05173	14
3063	RPS17	full-splice_match	alternative_3end	FALSE	5	3	5	0	1	0	1	0	1	2	7	2	5	7	1	1.40885	0.573282	0.919825	0	0.713818	0	1.62645	0	0.553717	0.990186	3.06125	1.28788	1.7214	2.92724	0.450192	6
3065	HERC2P2	novel_not_in_catalog	novel_exon	FALSE	7	0	2	2	2	3	2	2	3	2	6	2	4	3	5	1.97239	0	0.36793	0.456341	1.42764	2.94241	3.25289	4.27085	1.66115	0.990186	2.62392	1.28788	1.37712	1.25453	2.25096	11
3068	HERC2P2	novel_not_in_catalog	novel_exon	FALSE	2	5	3	0	3	4	0	2	1	0	1	3	3	3	0	0.563539	0.95547	0.551895	0	2.14145	3.92321	0	4.27085	0.553717	0	0.437321	1.93182	1.03284	1.25453	0	6
3069	ENSG00000274240	full-splice_match	mono-exon	FALSE	1	3	1	7	2	1	0	0	0	1	5	0	0	1	5	0.28177	0.573282	0.183965	1.59719	1.42764	0.980804	0	0	0	0.495093	2.1866	0	0	0.418177	2.25096	4
3076	BFAR	incomplete-splice_match	5prime_fragment	FALSE	4	7	12	9	2	4	2	0	3	2	7	3	4	1	7	1.12708	1.33766	2.20758	2.05354	1.42764	3.92321	3.25289	0	1.66115	0.990186	3.06125	1.93182	1.37712	0.418177	3.15134	12
3081	NOMO3	incomplete-splice_match	internal_fragment	FALSE	8	10	14	0	0	0	0	0	5	43	31	0	0	0	39	2.25416	1.91094	2.57551	0	0	0	0	0	2.76858	21.289	13.5569	0	0	0	17.5575	7
3084	NOMO3	full-splice_match	alternative_5end	FALSE	1	0	2	26	16	10	5	8	0	6	1	3	0	0	0	0.28177	0	0.36793	5.93244	11.4211	9.80804	8.13224	17.0834	0	2.97056	0.437321	1.93182	0	0	0	7
3089	NPIPA9	full-splice_match	mono-exon	FALSE	17	22	12	18	34	39	23	27	22	34	34	3	34	26	41	4.79008	4.20407	2.20758	4.10707	24.2698	38.2513	37.4083	57.6565	12.1818	16.8332	14.8689	1.93182	11.7055	10.8726	18.4579	15
3094	ENSG00000290515	incomplete-splice_match	3prime_fragment	FALSE	25	0	1	0	0	3	1	0	2	7	0	0	1	2	6	7.04424	0	0.183965	0	0	2.94241	1.62645	0	1.10743	3.46565	0	0	0.344279	0.836354	2.70115	6
3098	RRN3	incomplete-splice_match	5prime_fragment	FALSE	3	6	7	2	3	4	1	0	2	2	8	5	4	3	4	0.845309	1.14656	1.28775	0.456341	2.14145	3.92321	1.62645	0	1.10743	0.990186	3.49857	3.21971	1.37712	1.25453	1.80077	11
3100	RRN3	full-splice_match	alternative_3end	FALSE	6	7	8	5	0	0	0	0	0	0	0	0	4	0	0	1.69062	1.33766	1.47172	1.14085	0	0	0	0	0	0	0	0	1.37712	0	0	5
3103	NTAN1	full-splice_match	alternative_5end	FALSE	16	44	20	64	24	2	0	0	16	1	28	15	60	1	32	4.50831	8.40814	3.6793	14.6029	17.1316	1.96161	0	0	8.85947	0.495093	12.245	9.65912	20.6567	0.418177	14.4061	11
3105	NTAN1	full-splice_match	reference_match	FALSE	4	6	6	1	1	11	10	0	0	26	1	0	3	13	1	1.12708	1.14656	1.10379	0.228171	0.713818	10.7888	16.2645	0	0	12.8724	0.437321	0	1.03284	5.4363	0.450192	8
3108	ENSG00000282717	full-splice_match	mono-exon	FALSE	3	1	3	5	13	1	1	6	0	5	10	3	4	4	4	0.845309	0.191094	0.551895	1.14085	9.27963	0.980804	1.62645	12.8125	0	2.47547	4.37321	1.93182	1.37712	1.67271	1.80077	10
3114	ENSG00000276709	incomplete-splice_match	5prime_fragment	FALSE	23	20	24	12	15	11	0	8	9	15	28	30	18	26	16	6.4807	3.82188	4.41516	2.73805	10.7073	10.7888	0	17.0834	4.98345	7.4264	12.245	19.3182	6.19702	10.8726	7.20307	14
3125	NOMO3	genic	multi-exon	FALSE	28	14	9	0	0	0	0	0	7	105	0	0	0	33	0	7.88955	2.67532	1.65568	0	0	0	0	0	3.87602	51.9848	0	0	0	13.7998	0	6
3127	MPV17L	full-splice_match	alternative_3end	FALSE	3	1	4	0	2	2	1	0	1	11	6	2	3	5	8	0.845309	0.191094	0.73586	0	1.42764	1.96161	1.62645	0	0.553717	5.44602	2.62392	1.28788	1.03284	2.09089	3.60154	9
3129	MPV17L	full-splice_match	alternative_3end5end	FALSE	4	1	1	6	1	0	0	0	4	0	0	3	2	0	0	1.12708	0.191094	0.183965	1.36902	0.713818	0	0	0	2.21487	0	0	1.93182	0.688558	0	0	4
3133	BMERB1	incomplete-splice_match	5prime_fragment	FALSE	142	119	151	72	58	23	38	11	57	126	133	92	130	87	35	40.0113	22.7402	27.7787	16.4283	41.4014	22.5585	61.805	23.4897	31.5618	62.3817	58.1637	59.2426	44.7563	36.3814	15.7567	15
3134	BMERB1	full-splice_match	alternative_3end5end	FALSE	118	157	15	340	14	0	0	0	6	88	0	6	0	0	0	33.2488	30.0018	2.75947	77.578	9.99345	0	0	0	3.3223	43.5682	0	3.86365	0	0	0	8
3135	ENSG00000282074	incomplete-splice_match	3prime_fragment	FALSE	4	5	7	4	7	5	3	4	3	9	15	5	5	6	2	1.12708	0.95547	1.28775	0.912682	4.99672	4.90402	4.87934	8.5417	1.66115	4.45584	6.55981	3.21971	1.7214	2.50906	0.900384	12
3136	BMERB1	incomplete-splice_match	5prime_fragment	FALSE	9	6	3	7	7	0	0	1	0	7	7	7	7	2	0	2.53593	1.14656	0.551895	1.59719	4.99672	0	0	2.13542	0	3.46565	3.06125	4.50759	2.40995	0.836354	0	9
3137	BMERB1	full-splice_match	alternative_3end5end	FALSE	10	4	6	6	4	0	2	0	2	4	11	6	15	6	2	2.8177	0.764376	1.10379	1.36902	2.85527	0	3.25289	0	1.10743	1.98037	4.81053	3.86365	5.16419	2.50906	0.900384	11
3141	NDE1	incomplete-splice_match	5prime_fragment	FALSE	12	9	8	8	3	0	0	0	1	4	0	3	3	2	0	3.38124	1.71985	1.47172	1.82536	2.14145	0	0	0	0.553717	1.98037	0	1.93182	1.03284	0.836354	0	8
3142	NDE1	incomplete-splice_match	5prime_fragment	FALSE	4	6	5	5	0	1	1	0	5	1	0	2	3	1	2	1.12708	1.14656	0.919825	1.14085	0	0.980804	1.62645	0	2.76858	0.495093	0	1.28788	1.03284	0.418177	0.900384	7
3144	NDE1	incomplete-splice_match	5prime_fragment	FALSE	5	13	4	12	7	2	0	0	4	2	3	1	4	3	2	1.40885	2.48422	0.73586	2.73805	4.99672	1.96161	0	0	2.21487	0.990186	1.31196	0.643941	1.37712	1.25453	0.900384	9
3148	ENSG00000282638	full-splice_match	mono-exon	FALSE	2	5	5	3	1	0	0	3	10	14	0	4	7	6	0	0.563539	0.95547	0.919825	0.684512	0.713818	0	0	6.40627	5.53717	6.9313	0	2.57576	2.40995	2.50906	0	6
3149	ENSG00000282287	full-splice_match	reference_match	FALSE	1	3	13	11	0	2	1	0	18	8	0	8	8	4	12	0.28177	0.573282	2.39154	2.50988	0	1.96161	1.62645	0	9.9669	3.96075	0	5.15153	2.75423	1.67271	5.40231	10
3152	PARN	incomplete-splice_match	5prime_fragment	FALSE	7	6	9	6	0	0	0	0	0	0	0	0	0	0	3	1.97239	1.14656	1.65568	1.36902	0	0	0	0	0	0	0	0	0	0	1.35058	5
3166	PDXDC1	incomplete-splice_match	5prime_fragment	FALSE	28	16	26	13	17	6	6	5	6	8	30	20	18	20	17	7.88955	3.05751	4.78309	2.96622	12.1349	5.88482	9.75868	10.6771	3.3223	3.96075	13.1196	12.8788	6.19702	8.36354	7.65327	15
3173	NPIPA1	incomplete-splice_match	3prime_fragment	FALSE	2	69	0	0	5	0	1	0	2	0	0	0	0	0	0	0.563539	13.1855	0	0	3.56909	0	1.62645	0	1.10743	0	0	0	0	0	0	4
3185	NOMO1	incomplete-splice_match	3prime_fragment	FALSE	7	0	1	5	1	0	8	1	1	1	37	4	1	3	14	1.97239	0	0.183965	1.14085	0.713818	0	13.0116	2.13542	0.553717	0.495093	16.1809	2.57576	0.344279	1.25453	6.30269	8
3186	NOMO1	incomplete-splice_match	internal_fragment	FALSE	4	0	0	0	3	0	0	0	0	78	0	47	3	148	0	1.12708	0	0	0	2.14145	0	0	0	0	38.6173	0	30.2652	1.03284	61.8902	0	6
3201	MARF1	full-splice_match	alternative_5end	FALSE	1	12	0	12	0	1	0	4	0	0	1	1	2	0	6	0.28177	2.29313	0	2.73805	0	0.980804	0	8.5417	0	0	0.437321	0.643941	0.688558	0	2.70115	4
3206	MARF1	incomplete-splice_match	5prime_fragment	FALSE	4	7	6	2	9	0	1	0	4	2	4	3	7	1	0	1.12708	1.33766	1.10379	0.456341	6.42436	0	1.62645	0	2.21487	0.990186	1.74928	1.93182	2.40995	0.418177	0	9
3207	MARF1	incomplete-splice_match	5prime_fragment	FALSE	2	2	3	1	3	7	2	2	4	6	2	2	5	3	3	0.563539	0.382188	0.551895	0.228171	2.14145	6.86563	3.25289	4.27085	2.21487	2.97056	0.874642	1.28788	1.7214	1.25453	1.35058	10
3209	CEP20	full-splice_match	reference_match	FALSE	42	33	94	17	1	0	3	0	4	13	2	10	4	4	4	11.8343	6.30611	17.2927	3.8789	0.713818	0	4.87934	0	2.21487	6.43621	0.874642	6.43941	1.37712	1.67271	1.80077	11
3210	CEP20	novel_in_catalog	combination_of_known_splicesites	FALSE	11	6	3	2	5	1	0	3	1	1	1	2	0	9	6	3.09947	1.14656	0.551895	0.456341	3.56909	0.980804	0	6.40627	0.553717	0.495093	0.437321	1.28788	0	3.76359	2.70115	7
3221	CEP20	incomplete-splice_match	5prime_fragment	FALSE	7	6	9	4	2	2	0	1	3	4	2	1	6	5	9	1.97239	1.14656	1.65568	0.912682	1.42764	1.96161	0	2.13542	1.66115	1.98037	0.874642	0.643941	2.06567	2.09089	4.05173	11
3223	DECR2	incomplete-splice_match	3prime_fragment	FALSE	1	0	2	0	15	0	0	0	0	0	20	24	36	0	0	0.28177	0	0.36793	0	10.7073	0	0	0	0	0	8.74642	15.4546	12.394	0	0	4
3234	PAM16	full-splice_match	reference_match	FALSE	205	167	239	179	19	18	8	5	86	72	76	49	66	82	78	57.7628	31.9127	43.9676	40.8425	13.5625	17.6545	13.0116	10.6771	47.6196	35.6467	33.2364	31.5531	22.7224	34.2905	35.115	15
3235	PAM16	full-splice_match	reference_match	FALSE	27	23	34	23	29	2	14	0	8	20	18	5	19	44	12	7.60778	4.39516	6.25481	5.24792	20.7007	1.96161	22.7703	0	4.42973	9.90186	7.87177	3.21971	6.5413	18.3998	5.40231	14
3236	PAM16	novel_in_catalog	combination_of_known_junctions	FALSE	4	1	7	1	3	0	1	15	0	2	5	1	4	0	1	1.12708	0.191094	1.28775	0.228171	2.14145	0	1.62645	32.0314	0	0.990186	2.1866	0.643941	1.37712	0	0.450192	7
3238	PAM16	full-splice_match	reference_match	FALSE	10	6	7	2	0	0	0	0	2	2	2	2	77	1	0	2.8177	1.14656	1.28775	0.456341	0	0	0	0	1.10743	0.990186	0.874642	1.28788	26.5095	0.418177	0	6
3245	ENSG00000282011	full-splice_match	mono-exon	FALSE	8	3	13	3	3	7	4	4	7	3	6	7	11	4	8	2.25416	0.573282	2.39154	0.684512	2.14145	6.86563	6.50579	8.5417	3.87602	1.48528	2.62392	4.50759	3.78707	1.67271	3.60154	13
3253	DNAJA3	full-splice_match	alternative_5end	FALSE	19	28	11	38	6	25	5	0	13	6	14	17	14	14	15	5.35362	5.35063	2.02361	8.67048	4.28291	24.5201	8.13224	0	7.19832	2.97056	6.12249	10.947	4.81991	5.85448	6.75288	14
3256	DNAJA3	incomplete-splice_match	5prime_fragment	FALSE	2	4	1	2	4	3	1	0	0	1	4	2	3	3	2	0.563539	0.764376	0.183965	0.456341	2.85527	2.94241	1.62645	0	0	0.495093	1.74928	1.28788	1.03284	1.25453	0.900384	7
3265	HMOX2	incomplete-splice_match	5prime_fragment	FALSE	29	0	0	21	6	0	0	0	20	5	20	0	13	12	10	8.17132	0	0	4.79158	4.28291	0	0	0	11.0743	2.47547	8.74642	0	4.47563	5.01813	4.50192	9
3271	HMOX2	full-splice_match	alternative_3end5end	FALSE	163	217	222	17	45	23	0	0	96	127	9	29	147	147	102	45.9285	41.4674	40.8402	3.8789	32.1218	22.5585	0	0	53.1568	62.8768	3.93589	18.6743	50.609	61.472	45.9196	13
3275	HMOX2	incomplete-splice_match	3prime_fragment	FALSE	2	7	9	11	4	0	3	0	2	9	60	2	12	8	6	0.563539	1.33766	1.65568	2.50988	2.85527	0	4.87934	0	1.10743	4.45584	26.2392	1.28788	4.13135	3.34542	2.70115	12
3276	HMOX2	incomplete-splice_match	5prime_fragment	FALSE	2	3	4	0	2	1	0	0	0	0	5	2	2	8	1	0.563539	0.573282	0.73586	0	1.42764	0.980804	0	0	0	0	2.1866	1.28788	0.688558	3.34542	0.450192	4
3303	NMRAL1	full-splice_match	reference_match	FALSE	6	8	116	6	0	0	4	0	0	0	0	72	0	1	0	1.69062	1.52875	21.3399	1.36902	0	0	6.50579	0	0	0	0	46.3638	0	0.418177	0	6
3306	CDIP1	incomplete-splice_match	3prime_fragment	FALSE	2	0	0	1	0	0	0	0	187	506	3	0	1	282	0	0.563539	0	0	0.228171	0	0	0	0	103.545	250.517	1.31196	0	0.344279	117.926	0	4
3311	TAF15	full-splice_match	mono-exon	FALSE	12	7	10	7	3	6	3	0	6	6	19	8	9	6	30	3.38124	1.33766	1.83965	1.59719	2.14145	5.88482	4.87934	0	3.3223	2.97056	8.30909	5.15153	3.09851	2.50906	13.5058	14
3315	TAF15	incomplete-splice_match	3prime_fragment	FALSE	1	3	1	0	0	0	4	28	0	64	1	0	3	0	1	0.28177	0.573282	0.183965	0	0	0	6.50579	59.7919	0	31.686	0.437321	0	1.03284	0	0.450192	4
3317	TAF15	full-splice_match	reference_match	FALSE	96	182	4	0	25	0	0	0	0	0	67	0	0	0	0	27.0499	34.7791	0.73586	0	17.8454	0	0	0	0	0	29.3005	0	0	0	0	4
3319	TAF15	incomplete-splice_match	5prime_fragment	FALSE	7	3	3	6	0	0	0	0	1	2	2	0	6	2	3	1.97239	0.573282	0.551895	1.36902	0	0	0	0	0.553717	0.990186	0.874642	0	2.06567	0.836354	1.35058	4
3320	ENSG00000282498	full-splice_match	mono-exon	FALSE	1	0	1	0	11	1	3	4	1	2	2	6	2	6	0	0.28177	0	0.183965	0	7.85199	0.980804	4.87934	8.5417	0.553717	0.990186	0.874642	3.86365	0.688558	2.50906	0	5
3325	TAF15	full-splice_match	alternative_3end	FALSE	4	7	20	4	3	6	0	1	1	23	0	1	24	3	23	1.12708	1.33766	3.6793	0.912682	2.14145	5.88482	0	2.13542	0.553717	11.3871	0	0.643941	8.2627	1.25453	10.3544	10
3329	ZNHIT3	full-splice_match	reference_match	FALSE	118	162	139	152	29	1	31	1	80	92	77	72	109	64	87	33.2488	30.9572	25.5711	34.6819	20.7007	0.980804	50.4199	2.13542	44.2973	45.5486	33.6737	46.3638	37.5264	26.7633	39.1667	14
3330	ZNHIT3	full-splice_match	reference_match	FALSE	42	37	39	10	6	34	0	22	14	7	11	1	12	22	8	11.8343	7.07048	7.17463	2.28171	4.28291	33.3473	0	46.9793	7.75203	3.46565	4.81053	0.643941	4.13135	9.1999	3.60154	13
3332	ZNHIT3	full-splice_match	alternative_3end	FALSE	5	5	0	2	0	4	0	0	0	3	0	3	2	4	2	1.40885	0.95547	0	0.456341	0	3.92321	0	0	0	1.48528	0	1.93182	0.688558	1.67271	0.900384	5
3333	ZNHIT3	incomplete-splice_match	5prime_fragment	FALSE	8	6	6	5	0	0	2	2	2	0	11	6	6	8	6	2.25416	1.14656	1.10379	1.14085	0	0	3.25289	4.27085	1.10743	0	4.81053	3.86365	2.06567	3.34542	2.70115	12
3343	GGNBP2	incomplete-splice_match	5prime_fragment	FALSE	11	22	5	0	7	0	0	0	0	0	8	7	0	2	0	3.09947	4.20407	0.919825	0	4.99672	0	0	0	0	0	3.49857	4.50759	0	0.836354	0	5
3345	GGNBP2	incomplete-splice_match	5prime_fragment	FALSE	12	39	6	0	0	0	0	0	0	0	0	0	0	9	0	3.38124	7.45267	1.10379	0	0	0	0	0	0	0	0	0	0	3.76359	0	4
3349	GGNBP2	full-splice_match	reference_match	FALSE	10	5	9	4	4	5	4	2	0	4	3	2	3	3	6	2.8177	0.95547	1.65568	0.912682	2.85527	4.90402	6.50579	4.27085	0	1.98037	1.31196	1.28788	1.03284	1.25453	2.70115	12
3365	DHRS11	full-splice_match	mono-exon	FALSE	4	1	2	1	1	2	42	35	0	3	1	0	31	0	2	1.12708	0.191094	0.36793	0.228171	0.713818	1.96161	68.3108	74.7399	0	1.48528	0.437321	0	10.6727	0	0.900384	6
3368	ENSG00000282570	full-splice_match	mono-exon	FALSE	7	5	11	1	4	8	4	4	0	7	9	4	8	2	6	1.97239	0.95547	2.02361	0.228171	2.85527	7.84643	6.50579	8.5417	0	3.46565	3.93589	2.57576	2.75423	0.836354	2.70115	11
3377	AATF	full-splice_match	mono-exon	FALSE	5	5	6	5	1	0	0	2	2	1	2	1	2	1	3	1.40885	0.95547	1.10379	1.14085	0.713818	0	0	4.27085	1.10743	0.495093	0.874642	0.643941	0.688558	0.418177	1.35058	6
3378	TAF15	incomplete-splice_match	intron_retention	FALSE	2	3	1	2	2	0	0	0	6	2	5	2	1	1	5	0.563539	0.573282	0.183965	0.456341	1.42764	0	0	0	3.3223	0.990186	2.1866	1.28788	0.344279	0.418177	2.25096	5
3386	TAF15	incomplete-splice_match	5prime_fragment	FALSE	6	4	10	5	1	3	0	0	2	0	4	1	6	3	0	1.69062	0.764376	1.83965	1.14085	0.713818	2.94241	0	0	1.10743	0	1.74928	0.643941	2.06567	1.25453	0	8
3390	DUSP14	full-splice_match	reference_match	FALSE	19	7	0	39	29	8	26	0	0	0	0	2	45	1	28	5.35362	1.33766	0	8.89865	20.7007	7.84643	42.2876	0	0	0	0	1.28788	15.4926	0.418177	12.6054	9
3392	MRPL45	incomplete-splice_match	5prime_fragment	FALSE	38	29	31	25	4	8	0	2	8	3	25	15	12	21	8	10.7072	5.54173	5.70291	5.70426	2.85527	7.84643	0	4.27085	4.42973	1.48528	10.933	9.65912	4.13135	8.78172	3.60154	14
3393	MRPL45	full-splice_match	alternative_5end	FALSE	32	86	90	79	0	12	0	0	2	37	27	23	47	0	0	9.01663	16.4341	16.5568	18.0255	0	11.7696	0	0	1.10743	18.3184	11.8077	14.8106	16.1811	0	0	10
3394	MRPL45	incomplete-splice_match	5prime_fragment	FALSE	20	17	26	8	3	3	0	2	9	7	9	5	16	5	1	5.63539	3.2486	4.78309	1.82536	2.14145	2.94241	0	4.27085	4.98345	3.46565	3.93589	3.21971	5.50847	2.09089	0.450192	13
3407	ENSG00000282494	full-splice_match	mono-exon	FALSE	6	3	8	12	7	8	3	1	9	10	5	7	20	10	8	1.69062	0.573282	1.47172	2.73805	4.99672	7.84643	4.87934	2.13542	4.98345	4.95093	2.1866	4.50759	6.88558	4.18177	3.60154	14
3410	MLLT6	full-splice_match	mono-exon	FALSE	30	9	39	116	8	4	7	11	32	10	40	27	71	9	32	8.45309	1.71985	7.17463	26.4678	5.71054	3.92321	11.3851	23.4897	17.7189	4.95093	17.4928	17.3864	24.4438	3.76359	14.4061	15
3414	CISD3	full-splice_match	alternative_3end	FALSE	1	1	7	0	0	4	0	0	1	3	1	2	2	0	2	0.28177	0.191094	1.28775	0	0	3.92321	0	0	0.553717	1.48528	0.437321	1.28788	0.688558	0	0.900384	4
3416	CISD3	full-splice_match	alternative_3end5end	FALSE	66	54	86	24	12	3	13	6	29	25	27	7	17	35	11	18.5968	10.3191	15.821	5.47609	8.56581	2.94241	21.1438	12.8125	16.0578	12.3773	11.8077	4.50759	5.85274	14.6362	4.95211	15
3424	ENSG00000282749	full-splice_match	mono-exon	FALSE	2	2	0	3	0	1	0	0	0	2	6	0	4	3	6	0.563539	0.382188	0	0.684512	0	0.980804	0	0	0	0.990186	2.62392	0	1.37712	1.25453	2.70115	4
3428	PSMB3	full-splice_match	reference_match	FALSE	250	303	453	230	17	17	8	0	139	77	56	56	145	183	60	70.4424	57.9015	83.3361	52.4792	12.1349	16.6737	13.0116	0	76.9666	38.1222	24.49	36.0607	49.9205	76.5264	27.0115	14
3429	PSMB3	full-splice_match	reference_match	FALSE	7	6	11	2	1	0	0	0	1	0	0	1	2	6	0	1.97239	1.14656	2.02361	0.456341	0.713818	0	0	0	0.553717	0	0	0.643941	0.688558	2.50906	0	4
3437	HMGB1P24	full-splice_match	mono-exon	FALSE	1	3	4	5	3	2	0	2	1	2	1	2	1	1	2	0.28177	0.573282	0.73586	1.14085	2.14145	1.96161	0	4.27085	0.553717	0.990186	0.437321	1.28788	0.344279	0.418177	0.900384	5
3453	MYO19	incomplete-splice_match	5prime_fragment	FALSE	2	0	3	6	4	0	1	0	1	0	0	0	0	0	3	0.563539	0	0.551895	1.36902	2.85527	0	1.62645	0	0.553717	0	0	0	0	0	1.35058	4
3459	SYNRG	incomplete-splice_match	5prime_fragment	FALSE	4	2	0	0	0	0	1	1	2	0	0	2	2	0	0	1.12708	0.382188	0	0	0	0	1.62645	2.13542	1.10743	0	0	1.28788	0.688558	0	0	5
3473	DDX52	incomplete-splice_match	5prime_fragment	FALSE	6	0	9	2	0	3	0	0	0	0	1	1	3	5	2	1.69062	0	1.65568	0.456341	0	2.94241	0	0	0	0	0.437321	0.643941	1.03284	2.09089	0.900384	5
3474	DDX52	incomplete-splice_match	5prime_fragment	FALSE	15	7	45	1	2	8	1	5	2	8	15	25	14	1	5	4.22655	1.33766	8.27842	0.228171	1.42764	7.84643	1.62645	10.6771	1.10743	3.96075	6.55981	16.0985	4.81991	0.418177	2.25096	13
3479	NPEPPSP1	incomplete-splice_match	internal_fragment	FALSE	5	0	0	0	0	1	1	0	0	4	1	0	0	1	5	1.40885	0	0	0	0	0.980804	1.62645	0	0	1.98037	0.437321	0	0	0.418177	2.25096	4
3480	NPEPPSP1	incomplete-splice_match	5prime_fragment	FALSE	8	22	13	6	12	7	0	3	1	11	8	9	10	7	17	2.25416	4.20407	2.39154	1.36902	8.56581	6.86563	0	6.40627	0.553717	5.44602	3.49857	5.79547	3.44279	2.92724	7.65327	13
3482	NPEPPSP1	incomplete-splice_match	5prime_fragment	FALSE	21	23	7	10	44	27	15	18	9	4	17	11	11	12	18	5.91716	4.39516	1.28775	2.28171	31.408	26.4817	24.3967	38.4376	4.98345	1.98037	7.43445	7.08335	3.78707	5.01813	8.10346	15
3483	NPEPPSP1	novel_in_catalog	combination_of_known_splicesites	FALSE	2	0	0	0	3	2	1	1	0	0	1	4	0	0	0	0.563539	0	0	0	2.14145	1.96161	1.62645	2.13542	0	0	0.437321	2.57576	0	0	0	5
3485	NPEPPSP1	incomplete-splice_match	5prime_fragment	FALSE	1	6	1	2	6	8	3	2	0	2	6	4	7	1	1	0.28177	1.14656	0.183965	0.456341	4.28291	7.84643	4.87934	4.27085	0	0.990186	2.62392	2.57576	2.40995	0.418177	0.450192	8
3496	EPOP	full-splice_match	mono-exon	FALSE	17	37	28	64	16	9	19	9	24	73	66	39	141	2	43	4.79008	7.07048	5.15102	14.6029	11.4211	8.82723	30.9025	19.2188	13.2892	36.1418	28.8632	25.1137	48.5434	0.836354	19.3583	14
3498	PCGF2	incomplete-splice_match	3prime_fragment	FALSE	9	0	14	0	23	12	0	0	0	0	0	0	0	0	0	2.53593	0	2.57551	0	16.4178	11.7696	0	0	0	0	0	0	0	0	0	4
3501	PIP4K2B	incomplete-splice_match	5prime_fragment	FALSE	2	13	8	0	0	0	0	0	0	0	0	0	13	4	0	0.563539	2.48422	1.47172	0	0	0	0	0	0	0	0	0	4.47563	1.67271	0	4
3507	CWC25	incomplete-splice_match	5prime_fragment	FALSE	6	12	13	4	4	3	4	0	3	3	8	10	9	8	6	1.69062	2.29313	2.39154	0.912682	2.85527	2.94241	6.50579	0	1.66115	1.48528	3.49857	6.43941	3.09851	3.34542	2.70115	13
3510	METRNL	full-splice_match	alternative_3end5end	FALSE	8	0	0	11	4	0	0	0	5	0	0	0	34	26	15	2.25416	0	0	2.50988	2.85527	0	0	0	2.76858	0	0	0	11.7055	10.8726	6.75288	7
3511	TBCD	incomplete-splice_match	3prime_fragment	FALSE	24	1	2	120	37	2	0	0	0	1	1	37	2	1	3	6.76247	0.191094	0.36793	27.3805	26.4113	1.96161	0	0	0	0.495093	0.437321	23.8258	0.688558	0.418177	1.35058	6
3512	TBCD	incomplete-splice_match	3prime_fragment	FALSE	46	69	54	0	3	0	52	0	73	104	1	2	5	1	0	12.9614	13.1855	9.93411	0	2.14145	0	84.5753	0	40.4213	51.4897	0.437321	1.28788	1.7214	0.418177	0	9
3514	TBCD	full-splice_match	alternative_5end	FALSE	1	2	0	0	4	5	0	40	0	1	167	1	4	4	153	0.28177	0.382188	0	0	2.85527	4.90402	0	85.417	0	0.495093	73.0326	0.643941	1.37712	1.67271	68.8794	7
3517	TBCD	full-splice_match	alternative_5end	FALSE	1	1	0	0	1	9	0	3	0	1	7	1	3	67	4	0.28177	0.191094	0	0	0.713818	8.82723	0	6.40627	0	0.495093	3.06125	0.643941	1.03284	28.0179	1.80077	6
3522	RILP	incomplete-splice_match	3prime_fragment	FALSE	23	11	34	3	3	0	0	0	1	14	16	0	26	2	10	6.4807	2.10204	6.25481	0.684512	2.14145	0	0	0	0.553717	6.9313	6.99713	0	8.95126	0.836354	4.50192	8
3525	RILP	novel_in_catalog	combination_of_known_splicesites	FALSE	1	1	3	1	8	0	4	0	9	0	0	0	2	4	0	0.28177	0.191094	0.551895	0.228171	5.71054	0	6.50579	0	4.98345	0	0	0	0.688558	1.67271	0	4
3526	PRPF8	incomplete-splice_match	3prime_fragment	FALSE	144	4	4	3	0	0	0	0	0	6	4	0	1	2	236	40.5748	0.764376	0.73586	0.684512	0	0	0	0	0	2.97056	1.74928	0	0.344279	0.836354	106.245	4
3536	PRPF8	incomplete-splice_match	5prime_fragment	FALSE	17	0	0	0	14	5	3	4	11	0	1	0	9	0	6	4.79008	0	0	0	9.99345	4.90402	4.87934	8.5417	6.09088	0	0.437321	0	3.09851	0	2.70115	8
3539	PRPF8	full-splice_match	reference_match	FALSE	15	4	21	0	5	0	1	1	9	3	11	3	5	5	1	4.22655	0.764376	3.86326	0	3.56909	0	1.62645	2.13542	4.98345	1.48528	4.81053	1.93182	1.7214	2.09089	0.450192	11
3545	TIMM22	incomplete-splice_match	5prime_fragment	FALSE	5	0	4	2	8	4	0	0	0	2	3	2	3	5	8	1.40885	0	0.73586	0.456341	5.71054	3.92321	0	0	0	0.990186	1.31196	1.28788	1.03284	2.09089	3.60154	8
3546	TIMM22	full-splice_match	alternative_3end	FALSE	17	50	37	22	15	0	2	0	0	0	0	0	25	4	28	4.79008	9.5547	6.8067	5.01975	10.7073	0	3.25289	0	0	0	0	0	8.60698	1.67271	12.6054	9
3557	YWHAE	full-splice_match	alternative_3end5end	FALSE	92	197	960	30	230	144	191	111	621	868	915	532	1087	687	509	25.9228	37.6455	176.606	6.84512	164.178	141.236	310.651	237.032	343.858	429.741	400.149	342.577	374.231	287.288	229.148	15
3558	YWHAE	incomplete-splice_match	5prime_fragment	FALSE	18	4	14	1	0	0	0	0	2	4	2	0	6	3	0	5.07185	0.764376	2.57551	0.228171	0	0	0	0	1.10743	1.98037	0.874642	0	2.06567	1.25453	0	6
3560	YWHAE	incomplete-splice_match	5prime_fragment	FALSE	25	10	23	8	0	0	3	0	5	3	12	3	8	8	4	7.04424	1.91094	4.23119	1.82536	0	0	4.87934	0	2.76858	1.48528	5.24785	1.93182	2.75423	3.34542	1.80077	12
3562	YWHAE	full-splice_match	alternative_3end	FALSE	34	22	31	15	6	6	1	1	7	6	8	16	9	10	6	9.58017	4.20407	5.70291	3.42256	4.28291	5.88482	1.62645	2.13542	3.87602	2.97056	3.49857	10.3031	3.09851	4.18177	2.70115	15
3564	YWHAE	full-splice_match	alternative_3end	FALSE	569	451	586	222	88	53	52	40	106	115	251	186	163	164	80	160.327	86.1834	107.803	50.6539	62.816	51.9826	84.5753	85.417	58.694	56.9357	109.768	119.773	56.1175	68.5811	36.0154	15
3565	YWHAE	full-splice_match	mono-exon	FALSE	9	6	9	1	1	6	1	3	3	2	9	7	4	7	6	2.53593	1.14656	1.65568	0.228171	0.713818	5.88482	1.62645	6.40627	1.66115	0.990186	3.93589	4.50759	1.37712	2.92724	2.70115	12
3573	ENSG00000282330	full-splice_match	mono-exon	FALSE	9	22	28	20	8	2	3	6	9	7	8	16	8	23	8	2.53593	4.20407	5.15102	4.56341	5.71054	1.96161	4.87934	12.8125	4.98345	3.46565	3.49857	10.3031	2.75423	9.61807	3.60154	15
3579	GPI	incomplete-splice_match	internal_fragment	FALSE	3	0	2	3	0	0	1	1	0	0	6	0	3	1	3	0.845309	0	0.36793	0.684512	0	0	1.62645	2.13542	0	0	2.62392	0	1.03284	0.418177	1.35058	5
3584	LINC01480	full-splice_match	mono-exon	FALSE	2	2	2	6	0	2	1	1	0	0	2	0	0	1	0	0.563539	0.382188	0.36793	1.36902	0	1.96161	1.62645	2.13542	0	0	0.874642	0	0	0.418177	0	4
3586	ENSG00000280726	novel_not_in_catalog	Alt5	FALSE	1	0	4	3	0	0	0	1	2	0	11	0	6	3	0	0.28177	0	0.73586	0.684512	0	0	0	2.13542	1.10743	0	4.81053	0	2.06567	1.25453	0	5
3594	TAF4	full-splice_match	mono-exon	FALSE	2	5	1	2	1	2	0	1	1	3	5	3	1	0	3	0.563539	0.95547	0.183965	0.456341	0.713818	1.96161	0	2.13542	0.553717	1.48528	2.1866	1.93182	0.344279	0	1.35058	6
3596	MYT1	incomplete-splice_match	5prime_fragment	FALSE	5	0	0	2	2	2	0	0	0	0	0	2	2	2	2	1.40885	0	0	0.456341	1.42764	1.96161	0	0	0	0	0	1.28788	0.688558	0.836354	0.900384	4
3602	PCMTD2	full-splice_match	mono-exon	FALSE	54	45	30	3	41	28	4	25	21	16	49	34	34	36	42	15.2156	8.59923	5.51895	0.684512	29.2665	27.4625	6.50579	53.3856	11.628	7.92149	21.4287	21.894	11.7055	15.0544	18.9081	14
3606	PCMTD2	incomplete-splice_match	3prime_fragment	FALSE	1	0	0	5	0	3	0	0	5	8	1	0	0	0	0	0.28177	0	0	1.14085	0	2.94241	0	0	2.76858	3.96075	0.437321	0	0	0	0	4
3607	PCMTD2	full-splice_match	alternative_3end	FALSE	10	16	25	3	0	2	0	0	0	5	0	3	3	7	0	2.8177	3.05751	4.59912	0.684512	0	1.96161	0	0	0	2.47547	0	1.93182	1.03284	2.92724	0	8
3608	PCMTD2	incomplete-splice_match	5prime_fragment	FALSE	11	11	27	8	2	4	1	2	2	8	6	12	4	5	3	3.09947	2.10204	4.96705	1.82536	1.42764	3.92321	1.62645	4.27085	1.10743	3.96075	2.62392	7.72729	1.37712	2.09089	1.35058	15
3610	SPATC1L	full-splice_match	reference_match	FALSE	22	56	48	79	14	0	0	0	4	39	46	30	41	34	36	6.19893	10.7013	8.83032	18.0255	9.99345	0	0	0	2.21487	19.3086	20.1168	19.3182	14.1154	14.218	16.2069	12
3614	LSS	full-splice_match	alternative_5end	FALSE	1	4	12	1	0	0	0	1	0	0	6	0	5	1	10	0.28177	0.764376	2.20758	0.228171	0	0	0	2.13542	0	0	2.62392	0	1.7214	0.418177	4.50192	5
3620	BTG3	full-splice_match	alternative_3end5end	FALSE	30	36	47	19	10	7	3	3	10	3	13	17	12	21	3	8.45309	6.87939	8.64635	4.33524	7.13818	6.86563	4.87934	6.40627	5.53717	1.48528	5.68517	10.947	4.13135	8.78172	1.35058	15
3623	ZNF280B	novel_in_catalog	combination_of_known_splicesites	FALSE	2	7	6	0	4	0	3	0	0	3	15	0	11	3	1	0.563539	1.33766	1.10379	0	2.85527	0	4.87934	0	0	1.48528	6.55981	0	3.78707	1.25453	0.450192	8
3625	ZNF280B	full-splice_match	alternative_3end5end	FALSE	1	0	4	7	0	1	0	0	7	2	2	8	12	0	0	0.28177	0	0.73586	1.59719	0	0.980804	0	0	3.87602	0.990186	0.874642	5.15153	4.13135	0	0	4
3632	RBFOX2	full-splice_match	alternative_5end	FALSE	7	27	8	2	0	22	6	8	0	2	4	2	4	19	57	1.97239	5.15954	1.47172	0.456341	0	21.5777	9.75868	17.0834	0	0.990186	1.74928	1.28788	1.37712	7.94537	25.6609	11
3640	PVALB	full-splice_match	alternative_5end	FALSE	222	15	164	0	50	22	1	3	78	99	72	49	193	41	31	62.5529	2.86641	30.1702	0	35.6909	21.5777	1.62645	6.40627	43.1899	49.0142	31.4871	31.5531	66.4459	17.1453	13.956	14
3648	CHCHD10	full-splice_match	reference_match	FALSE	832	418	758	241	169	74	103	49	154	373	269	229	512	292	230	234.432	79.8773	139.445	54.9891	120.635	72.5795	167.524	104.636	85.2724	184.67	117.639	147.463	176.271	122.108	103.544	15
3652	CHCHD10	full-splice_match	alternative_5end	FALSE	6	0	4	1	0	3	0	0	2	6	5	3	1	4	2	1.69062	0	0.73586	0.228171	0	2.94241	0	0	1.10743	2.97056	2.1866	1.93182	0.344279	1.67271	0.900384	7
3654	CHCHD10	novel_in_catalog	combination_of_known_junctions,intron_retention	FALSE	9	8	2	0	3	10	0	1	43	13	0	0	2	6	5	2.53593	1.52875	0.36793	0	2.14145	9.80804	0	2.13542	23.8098	6.43621	0	0	0.688558	2.50906	2.25096	9
3656	CHCHD10	incomplete-splice_match	3prime_fragment	FALSE	6	0	4	0	0	0	0	0	1	3	1	2	6	0	0	1.69062	0	0.73586	0	0	0	0	0	0.553717	1.48528	0.437321	1.28788	2.06567	0	0	4
3657	CHCHD10	full-splice_match	reference_match	FALSE	10	10	9	4	4	2	3	0	0	2	0	0	6	3	2	2.8177	1.91094	1.65568	0.912682	2.85527	1.96161	4.87934	0	0	0.990186	0	0	2.06567	1.25453	0.900384	8
3662	SMARCB1	full-splice_match	reference_match	FALSE	59	9	10	128	8	1	0	0	1	1	0	48	100	0	0	16.6244	1.71985	1.83965	29.2058	5.71054	0.980804	0	0	0.553717	0.495093	0	30.9092	34.4279	0	0	7
3668	SMARCB1	full-splice_match	reference_match	FALSE	4	11	85	2	1	12	0	0	22	80	44	0	2	3	1	1.12708	2.10204	15.637	0.456341	0.713818	11.7696	0	0	12.1818	39.6075	19.2421	0	0.688558	1.25453	0.450192	8
3672	SLC2A11	full-splice_match	alternative_3end5end	FALSE	1	0	0	1	5	3	0	2	1	0	3	2	1	0	0	0.28177	0	0	0.228171	3.56909	2.94241	0	4.27085	0.553717	0	1.31196	1.28788	0.344279	0	0	5
3674	MIF_SLC2A11	fusion	multi-exon	FALSE	2	0	590	169	0	0	0	0	245	0	0	194	0	0	0	0.563539	0	108.539	38.5608	0	0	0	0	135.661	0	0	124.925	0	0	0	4
3675	SLC2A11	incomplete-splice_match	5prime_fragment	FALSE	3	18	0	0	0	2	0	0	7	11	0	0	0	2	9	0.845309	3.43969	0	0	0	1.96161	0	0	3.87602	5.44602	0	0	0	0.836354	4.05173	5
3676	SLC2A11	full-splice_match	alternative_5end	FALSE	12	0	0	0	0	10	4	1	9	8	3	0	0	0	0	3.38124	0	0	0	0	9.80804	6.50579	2.13542	4.98345	3.96075	1.31196	0	0	0	0	7
3677	MIF	full-splice_match	alternative_5end	FALSE	2906	0	3777	869	199	128	169	74	574	395	525	296	768	1058	460	818.823	0	694.835	198.28	142.05	125.543	274.87	158.021	317.833	195.562	229.593	190.607	264.406	442.431	207.088	14
3678	MIF	full-splice_match	alternative_5end	FALSE	33	25	50	26	7	7	3	4	11	8	4	15	28	25	14	9.2984	4.77735	9.19825	5.93244	4.99672	6.86563	4.87934	8.5417	6.09088	3.96075	1.74928	9.65912	9.63982	10.4544	6.30269	15
3688	ENSG00000281354	full-splice_match	mono-exon	FALSE	18	17	22	15	19	3	3	6	8	11	11	3	18	7	24	5.07185	3.2486	4.04723	3.42256	13.5625	2.94241	4.87934	12.8125	4.42973	5.44602	4.81053	1.93182	6.19702	2.92724	10.8046	15
3704	DDT	full-splice_match	alternative_3end5end	FALSE	1	592	0	318	70	33	40	16	200	137	138	145	0	257	92	0.28177	113.128	0	72.5582	49.9672	32.3665	65.0579	34.1668	110.743	67.8278	60.3503	93.3715	0	107.472	41.4177	12
3707	ENSG00000281582	full-splice_match	mono-exon	FALSE	2	2	4	1	1	2	0	0	0	3	0	4	3	1	0	0.563539	0.382188	0.73586	0.228171	0.713818	1.96161	0	0	0	1.48528	0	2.57576	1.03284	0.418177	0	4
3710	GSTT1	full-splice_match	alternative_3end5end	FALSE	21	12	22	0	7	0	0	0	5	6	0	5	10	5	0	5.91716	2.29313	4.04723	0	4.99672	0	0	0	2.76858	2.97056	0	3.21971	3.44279	2.09089	0	9
3711	GSTT1	full-splice_match	alternative_3end	FALSE	6	0	5	0	0	0	0	0	2	0	0	2	158	1	0	1.69062	0	0.919825	0	0	0	0	0	1.10743	0	0	1.28788	54.3961	0.418177	0	4
3715	GSTT1	full-splice_match	reference_match	FALSE	153	128	305	0	5	1	0	0	7	116	0	5	4	45	0	43.1108	24.46	56.1093	0	3.56909	0.980804	0	0	3.87602	57.4308	0	3.21971	1.37712	18.818	0	9
3718	GSTT1	full-splice_match	alternative_3end5end	FALSE	48	17	56	0	129	2	0	0	0	8	0	103	11	5	0	13.5249	3.2486	10.302	0	92.0825	1.96161	0	0	0	3.96075	0	66.3259	3.78707	2.09089	0	9
3724	GSTT1	full-splice_match	mono-exon	FALSE	14	8	8	0	21	6	0	0	15	17	0	19	18	12	0	3.94478	1.52875	1.47172	0	14.9902	5.88482	0	0	8.30575	8.41658	0	12.2349	6.19702	5.01813	0	10
3725	GSTT1	full-splice_match	alternative_5end	FALSE	38	0	30	0	1	3	0	0	2	3	0	2	0	1	0	10.7072	0	5.51895	0	0.713818	2.94241	0	0	1.10743	1.48528	0	1.28788	0	0.418177	0	6
3728	GSTT1	full-splice_match	reference_match	FALSE	20	18	31	0	11	1	0	0	77	5	0	0	10	2	0	5.63539	3.43969	5.70291	0	7.85199	0.980804	0	0	42.6362	2.47547	0	0	3.44279	0.836354	0	7
3732	ENSG00000281099	full-splice_match	mono-exon	FALSE	1	1	5	3	2	0	1	0	3	2	3	0	2	1	1	0.28177	0.191094	0.919825	0.684512	1.42764	0	1.62645	0	1.66115	0.990186	1.31196	0	0.688558	0.418177	0.450192	4
3735	ENSG00000281519	novel_not_in_catalog	novel_exon	FALSE	4	8	5	0	4	3	5	2	1	1	9	4	3	1	3	1.12708	1.52875	0.919825	0	2.85527	2.94241	8.13224	4.27085	0.553717	0.495093	3.93589	2.57576	1.03284	0.418177	1.35058	10
3747	FRG1	full-splice_match	alternative_5end	FALSE	13	46	54	36	0	1	0	1	11	8	6	4	6	6	7	3.66301	8.79033	9.93411	8.21414	0	0.980804	0	2.13542	6.09088	3.96075	2.62392	2.57576	2.06567	2.50906	3.15134	12
3754	SERF1B	full-splice_match	reference_match	FALSE	120	58	138	18	13	8	5	5	26	29	34	10	40	32	39	33.8124	11.0835	25.3872	4.10707	9.27963	7.84643	8.13224	10.6771	14.3966	14.3577	14.8689	6.43941	13.7712	13.3817	17.5575	15
3755	SERF1B	incomplete-splice_match	5prime_fragment	FALSE	35	23	34	7	4	7	6	10	2	10	14	5	12	8	11	9.86194	4.39516	6.25481	1.59719	2.85527	6.86563	9.75868	21.3542	1.10743	4.95093	6.12249	3.21971	4.13135	3.34542	4.95211	15
3756	SERF1B	full-splice_match	alternative_3end	FALSE	10	0	16	0	0	0	0	0	0	0	1	0	6	7	3	2.8177	0	2.94344	0	0	0	0	0	0	0	0.437321	0	2.06567	2.92724	1.35058	5
3761	SERF1B	incomplete-splice_match	5prime_fragment	FALSE	10	0	5	0	2	6	0	1	0	6	0	2	5	4	0	2.8177	0	0.919825	0	1.42764	5.88482	0	2.13542	0	2.97056	0	1.28788	1.7214	1.67271	0	8
3762	SERF1B	full-splice_match	reference_match	FALSE	10	2	12	0	1	0	3	0	2	1	2	1	6	2	1	2.8177	0.382188	2.20758	0	0.713818	0	4.87934	0	1.10743	0.495093	0.874642	0.643941	2.06567	0.836354	0.450192	5
3764	SMN2	incomplete-splice_match	5prime_fragment	FALSE	35	14	18	10	11	12	10	13	9	8	23	15	15	9	17	9.86194	2.67532	3.31137	2.28171	7.85199	11.7696	16.2645	27.7605	4.98345	3.96075	10.0584	9.65912	5.16419	3.76359	7.65327	15
3767	SMN2	full-splice_match	reference_match	FALSE	12	4	11	128	0	0	0	0	0	39	0	0	0	18	18	3.38124	0.764376	2.02361	29.2058	0	0	0	0	0	19.3086	0	0	0	7.52719	8.10346	6
3768	SMN2	full-splice_match	alternative_3end5end	FALSE	1	58	40	0	1	9	0	0	0	0	0	0	0	3	0	0.28177	11.0835	7.3586	0	0.713818	8.82723	0	0	0	0	0	0	0	1.25453	0	4
3775	SERF1A	incomplete-splice_match	5prime_fragment	FALSE	46	21	39	9	3	6	2	8	9	5	25	8	18	11	12	12.9614	4.01298	7.17463	2.05354	2.14145	5.88482	3.25289	17.0834	4.98345	2.47547	10.933	5.15153	6.19702	4.59995	5.40231	15
3776	SERF1A	full-splice_match	reference_match	FALSE	95	50	79	39	10	14	11	6	19	37	40	16	40	24	22	26.7681	9.5547	14.5332	8.89865	7.13818	13.7313	17.8909	12.8125	10.5206	18.3184	17.4928	10.3031	13.7712	10.0363	9.90423	15
3777	SERF1A	full-splice_match	alternative_3end	FALSE	18	0	18	3	1	0	0	0	0	1	0	11	1	1	4	5.07185	0	3.31137	0.684512	0.713818	0	0	0	0	0.495093	0	7.08335	0.344279	0.418177	1.80077	4
3779	SERF1A	full-splice_match	reference_match	FALSE	7	3	10	7	1	2	0	0	3	3	2	0	7	6	2	1.97239	0.573282	1.83965	1.59719	0.713818	1.96161	0	0	1.66115	1.48528	0.874642	0	2.40995	2.50906	0.900384	8
3780	SERF1A	incomplete-splice_match	5prime_fragment	FALSE	7	2	5	0	1	0	0	1	4	2	5	0	0	4	1	1.97239	0.382188	0.919825	0	0.713818	0	0	2.13542	2.21487	0.990186	2.1866	0	0	1.67271	0.450192	5
3782	SMN1	incomplete-splice_match	5prime_fragment	FALSE	24	25	21	17	16	16	17	13	11	12	31	16	25	18	23	6.76247	4.77735	3.86326	3.8789	11.4211	15.6929	27.6496	27.7605	6.09088	5.94112	13.5569	10.3031	8.60698	7.52719	10.3544	15
3783	SMN1	full-splice_match	reference_match	FALSE	13	8	6	87	0	0	0	0	0	0	0	0	0	25	0	3.66301	1.52875	1.10379	19.8508	0	0	0	0	0	0	0	0	0	10.4544	0	5
3784	SMN1	incomplete-splice_match	5prime_fragment	FALSE	13	0	19	0	0	5	0	0	7	3	1	0	4	3	8	3.66301	0	3.49533	0	0	4.90402	0	0	3.87602	1.48528	0.437321	0	1.37712	1.25453	3.60154	8
3788	BDP1	incomplete-splice_match	5prime_fragment	FALSE	132	139	140	68	68	90	52	47	29	19	52	32	38	46	54	37.1936	26.5621	25.7551	15.5156	48.5396	88.2723	84.5753	100.365	16.0578	9.40677	22.7407	20.6061	13.0826	19.2361	24.3104	15
3789	BDP1	incomplete-splice_match	5prime_fragment	FALSE	9	6	6	1	3	2	1	1	1	2	2	3	0	1	1	2.53593	1.14656	1.10379	0.228171	2.14145	1.96161	1.62645	2.13542	0.553717	0.990186	0.874642	1.93182	0	0.418177	0.450192	8
3791	BDP1	incomplete-splice_match	5prime_fragment	FALSE	4	8	10	19	3	0	0	0	0	0	0	0	5	0	0	1.12708	1.52875	1.83965	4.33524	2.14145	0	0	0	0	0	0	0	1.7214	0	0	6
3807	GTF2H2	incomplete-splice_match	3prime_fragment	FALSE	3	0	1	7	1	1	0	0	1	3	0	2	3	2	13	0.845309	0	0.183965	1.59719	0.713818	0.980804	0	0	0.553717	1.48528	0	1.28788	1.03284	0.836354	5.8525	5
3809	GTF2H2	incomplete-splice_match	3prime_fragment	FALSE	1	2	0	4	1	4	2	1	4	0	0	6	6	0	12	0.28177	0.382188	0	0.912682	0.713818	3.92321	3.25289	2.13542	2.21487	0	0	3.86365	2.06567	0	5.40231	7
3821	GTF2H2	incomplete-splice_match	5prime_fragment	FALSE	4	18	0	0	2	1	0	0	0	0	1	5	0	0	1	1.12708	3.43969	0	0	1.42764	0.980804	0	0	0	0	0.437321	3.21971	0	0	0.450192	4
3825	GTF2H2	incomplete-splice_match	5prime_fragment	FALSE	1	6	1	2	6	1	4	0	1	0	2	2	1	3	5	0.28177	1.14656	0.183965	0.456341	4.28291	0.980804	6.50579	0	0.553717	0	0.874642	1.28788	0.344279	1.25453	2.25096	6
3837	MCCC2	incomplete-splice_match	5prime_fragment	FALSE	5	4	6	1	1	1	0	1	2	1	3	7	2	2	1	1.40885	0.764376	1.10379	0.228171	0.713818	0.980804	0	2.13542	1.10743	0.495093	1.31196	4.50759	0.688558	0.836354	0.450192	6
3840	ENSG00000290527	incomplete-splice_match	3prime_fragment	FALSE	3	0	0	43	0	0	0	0	0	0	0	20	0	14	22	0.845309	0	0	9.81133	0	0	0	0	0	0	0	12.8788	0	5.85448	9.90423	4
3854	IFITM10	full-splice_match	mono-exon	FALSE	35	46	53	99	32	21	26	16	41	78	28	53	92	71	65	9.86194	8.79033	9.75014	22.5889	22.8422	20.5969	42.2876	34.1668	22.7024	38.6173	12.245	34.1289	31.6737	29.6906	29.2625	15
3857	SMIM10L1	full-splice_match	mono-exon	FALSE	138	97	193	49	52	53	43	19	50	92	91	35	62	93	73	38.8842	18.5361	35.5052	11.1804	37.1185	51.9826	69.9372	40.5731	27.6858	45.5486	39.7962	22.5379	21.3453	38.8905	32.864	15
3860	TAS2R14	full-splice_match	mono-exon	FALSE	3	15	6	3	5	2	1	2	2	4	3	3	6	6	16	0.845309	2.86641	1.10379	0.684512	3.56909	1.96161	1.62645	4.27085	1.10743	1.98037	1.31196	1.93182	2.06567	2.50906	7.20307	13
3867	TAS2R15P	full-splice_match	mono-exon	FALSE	2	4	3	12	0	2	0	2	13	11	3	6	4	1	6	0.563539	0.764376	0.551895	2.73805	0	1.96161	0	4.27085	7.19832	5.44602	1.31196	3.86365	1.37712	0.418177	2.70115	9
3868	PRH1	incomplete-splice_match	5prime_fragment	FALSE	7	0	10	1	1	1	9	2	3	0	24	3	3	2	0	1.97239	0	1.83965	0.228171	0.713818	0.980804	14.638	4.27085	1.66115	0	10.4957	1.93182	1.03284	0.836354	0	8
3872	PRR4	novel_not_in_catalog	novel_exon	FALSE	5	2	2	1	2	0	1	0	2	1	0	0	1	1	0	1.40885	0.382188	0.36793	0.228171	1.42764	0	1.62645	0	1.10743	0.495093	0	0	0.344279	0.418177	0	4
3874	TAS2R20	full-splice_match	mono-exon	FALSE	4	0	5	6	8	1	0	0	3	8	0	1	3	0	9	1.12708	0	0.919825	1.36902	5.71054	0.980804	0	0	1.66115	3.96075	0	0.643941	1.03284	0	4.05173	7
3875	PRR4	novel_not_in_catalog	novel_exon	FALSE	2	2	19	2	0	1	0	0	4	4	1	1	1	6	1	0.563539	0.382188	3.49533	0.456341	0	0.980804	0	0	2.21487	1.98037	0.437321	0.643941	0.344279	2.50906	0.450192	4
3878	TAS2R19	full-splice_match	mono-exon	FALSE	1	0	0	4	0	0	6	0	5	38	1	0	2	2	12	0.28177	0	0	0.912682	0	0	9.75868	0	2.76858	18.8135	0.437321	0	0.688558	0.836354	5.40231	4
3879	TAS2R31	full-splice_match	mono-exon	FALSE	3	4	2	15	1	0	1	1	7	18	2	1	2	2	8	0.845309	0.764376	0.36793	3.42256	0.713818	0	1.62645	2.13542	3.87602	8.91168	0.874642	0.643941	0.688558	0.836354	3.60154	6
3880	PRR4	full-splice_match	reference_match	FALSE	12	16	11	14	1	0	0	0	12	7	0	3	12	4	6	3.38124	3.05751	2.02361	3.19439	0.713818	0	0	0	6.6446	3.46565	0	1.93182	4.13135	1.67271	2.70115	10
3884	TAS2R14	incomplete-splice_match	5prime_fragment	FALSE	10	0	15	16	0	0	4	0	9	4	6	7	1	6	6	2.8177	0	2.75947	3.65073	0	0	6.50579	0	4.98345	1.98037	2.62392	4.50759	0.344279	2.50906	2.70115	10
3889	TAS2R30	full-splice_match	mono-exon	FALSE	2	0	3	14	0	0	1	1	15	21	5	0	0	4	12	0.563539	0	0.551895	3.19439	0	0	1.62645	2.13542	8.30575	10.397	2.1866	0	0	1.67271	5.40231	8
3890	ENSG00000282675	full-splice_match	mono-exon	FALSE	2	4	2	10	9	6	1	1	10	9	10	6	18	5	14	0.563539	0.764376	0.36793	2.28171	6.42436	5.88482	1.62645	2.13542	5.53717	4.45584	4.37321	3.86365	6.19702	2.09089	6.30269	12
3893	ENSG00000282363	full-splice_match	mono-exon	FALSE	6	10	2	11	0	1	1	1	2	2	0	2	0	4	7	1.69062	1.91094	0.36793	2.50988	0	0.980804	1.62645	2.13542	1.10743	0.990186	0	1.28788	0	1.67271	3.15134	9
3895	TAS2R13	full-splice_match	mono-exon	FALSE	1	0	3	0	1	0	2	0	5	5	4	1	1	4	6	0.28177	0	0.551895	0	0.713818	0	3.25289	0	2.76858	2.47547	1.74928	0.643941	0.344279	1.67271	2.70115	6
3898	HERC2	incomplete-splice_match	3prime_fragment	FALSE	85	22	0	0	30	52	0	0	0	163	1	0	242	43	28	23.9504	4.20407	0	0	21.4145	51.0018	0	0	0	80.7002	0.437321	0	83.3155	17.9816	12.6054	8
3908	HERC2P9	full-splice_match	mono-exon	FALSE	12	17	34	29	15	58	38	20	42	66	14	22	12	20	113	3.38124	3.2486	6.25481	6.61695	10.7073	56.8866	61.805	42.7085	23.2561	32.6761	6.12249	14.1667	4.13135	8.36354	50.8717	15
3909	RPL41P2	full-splice_match	mono-exon	FALSE	20	22	34	15	9	3	3	2	13	8	20	8	16	14	15	5.63539	4.20407	6.25481	3.42256	6.42436	2.94241	4.87934	4.27085	7.19832	3.96075	8.74642	5.15153	5.50847	5.85448	6.75288	15
3910	HERC2P9	novel_not_in_catalog	novel_exon	FALSE	7	8	7	4	4	2	0	1	3	3	3	3	4	4	9	1.97239	1.52875	1.28775	0.912682	2.85527	1.96161	0	2.13542	1.66115	1.48528	1.31196	1.93182	1.37712	1.67271	4.05173	13
3912	HERC2P9	novel_not_in_catalog	novel_exon	FALSE	1	3	2	6	4	1	1	1	1	3	2	3	1	1	5	0.28177	0.573282	0.36793	1.36902	2.85527	0.980804	1.62645	2.13542	0.553717	1.48528	0.874642	1.93182	0.344279	0.418177	2.25096	7
3915	SCG5	novel_not_in_catalog	Alt3	FALSE	554	655	361	473	7	72	29	0	177	47	162	72	335	267	263	156.1	125.167	66.4113	107.925	4.99672	70.6179	47.167	0	98.0078	23.2694	70.846	46.3638	115.334	111.653	118.401	14
3918	SCG5	incomplete-splice_match	5prime_fragment	FALSE	2	1	3	0	0	2	1	2	1	0	2	2	2	3	0	0.563539	0.191094	0.551895	0	0	1.96161	1.62645	4.27085	0.553717	0	0.874642	1.28788	0.688558	1.25453	0	5
3919	SCG5	incomplete-splice_match	5prime_fragment	FALSE	3	0	2	0	1	0	0	1	3	0	0	2	0	3	0	0.845309	0	0.36793	0	0.713818	0	0	2.13542	1.66115	0	0	1.28788	0	1.25453	0	4
3921	SCG5	novel_not_in_catalog	Alt3	FALSE	9	3	13	2	2	1	0	0	0	0	0	0	5	0	0	2.53593	0.573282	2.39154	0.456341	1.42764	0.980804	0	0	0	0	0	0	1.7214	0	0	4
3940	APBA2	incomplete-splice_match	3prime_fragment	FALSE	125	98	0	0	0	0	0	0	0	0	0	0	331	154	0	35.2212	18.7272	0	0	0	0	0	0	0	0	0	0	113.956	64.3993	0	4
3941	APBA2	incomplete-splice_match	3prime_fragment	FALSE	26	2	3	2	3	105	0	1	0	8	0	2	3	5	0	7.32601	0.382188	0.551895	0.456341	2.14145	102.984	0	2.13542	0	3.96075	0	1.28788	1.03284	2.09089	0	8
3955	FAN1	novel_not_in_catalog	Alt5	FALSE	2	7	12	5	0	2	0	0	4	0	0	4	1	2	1	0.563539	1.33766	2.20758	1.14085	0	1.96161	0	0	2.21487	0	0	2.57576	0.344279	0.836354	0.450192	6
3957	FAN1	incomplete-splice_match	5prime_fragment	FALSE	11	39	33	25	14	4	4	0	15	0	2	1	9	4	4	3.09947	7.45267	6.07084	5.70426	9.99345	3.92321	6.50579	0	8.30575	0	0.874642	0.643941	3.09851	1.67271	1.80077	11
3958	FAN1	novel_not_in_catalog	partial_intron_retention	FALSE	6	9	9	2	0	4	0	2	3	1	0	0	2	1	2	1.69062	1.71985	1.65568	0.456341	0	3.92321	0	4.27085	1.66115	0.495093	0	0	0.688558	0.418177	0.900384	6
3965	KLF13	full-splice_match	alternative_3end	FALSE	22	86	6	65	24	11	0	8	23	17	21	27	36	4	21	6.19893	16.4341	1.10379	14.8311	17.1316	10.7888	0	17.0834	12.7355	8.41658	9.18374	17.3864	12.394	1.67271	9.45403	14
3968	KLF13	novel_not_in_catalog	novel_exon	FALSE	1	9	4	2	2	1	3	1	1	4	2	0	2	1	1	0.28177	1.71985	0.73586	0.456341	1.42764	0.980804	4.87934	2.13542	0.553717	1.98037	0.874642	0	0.688558	0.418177	0.450192	5
3973	GREM1	full-splice_match	alternative_3end	FALSE	12	13	13	11	2	3	0	0	4	1	1	3	0	7	5	3.38124	2.48422	2.39154	2.50988	1.42764	2.94241	0	0	2.21487	0.495093	0.437321	1.93182	0	2.92724	2.25096	10
3988	MTMR10	incomplete-splice_match	5prime_fragment	FALSE	4	9	13	3	2	3	0	0	1	0	3	3	2	2	2	1.12708	1.71985	2.39154	0.684512	1.42764	2.94241	0	0	0.553717	0	1.31196	1.93182	0.688558	0.836354	0.900384	7
4013	ENTREP2	incomplete-splice_match	3prime_fragment	FALSE	6	0	0	0	0	0	0	1	0	6	0	0	0	3	2	1.69062	0	0	0	0	0	0	2.13542	0	2.97056	0	0	0	1.25453	0.900384	4
4020	NSMCE3	full-splice_match	mono-exon	FALSE	54	105	80	152	34	2	11	3	63	68	49	27	126	66	51	15.2156	20.0649	14.7172	34.6819	24.2698	1.96161	17.8909	6.40627	34.8841	33.6663	21.4287	17.3864	43.3792	27.5997	22.9598	15
4022	ENSG00000282503	full-splice_match	mono-exon	FALSE	3	2	6	6	4	2	4	1	3	6	7	10	6	5	8	0.845309	0.382188	1.10379	1.36902	2.85527	1.96161	6.50579	2.13542	1.66115	2.97056	3.06125	6.43941	2.06567	2.09089	3.60154	13
4025	TJP1	incomplete-splice_match	3prime_fragment	FALSE	97	7	19	2	0	0	0	0	0	0	0	0	0	2	6	27.3317	1.33766	3.49533	0.456341	0	0	0	0	0	0	0	0	0	0.836354	2.70115	4
4026	TJP1	incomplete-splice_match	3prime_fragment	FALSE	9	215	0	0	0	3	0	0	115	4	2	2	13	125	0	2.53593	41.0852	0	0	0	2.94241	0	0	63.6774	1.98037	0.874642	1.28788	4.47563	52.2721	0	8
4041	HERC2	incomplete-splice_match	5prime_fragment	FALSE	3	7	8	0	5	6	2	3	2	2	0	2	3	6	1	0.845309	1.33766	1.47172	0	3.56909	5.88482	3.25289	6.40627	1.10743	0.990186	0	1.28788	1.03284	2.50906	0.450192	10
4043	TJP1	novel_not_in_catalog	novel_exon	FALSE	11	6	4	5	0	0	1	0	0	3	0	3	0	0	0	3.09947	1.14656	0.73586	1.14085	0	0	1.62645	0	0	1.48528	0	1.93182	0	0	0	6
4045	TJP1	novel_not_in_catalog	novel_exon	FALSE	13	40	77	16	4	3	0	0	0	1	0	0	6	11	8	3.66301	7.64376	14.1653	3.65073	2.85527	2.94241	0	0	0	0.495093	0	0	2.06567	4.59995	3.60154	9
4047	TJP1	incomplete-splice_match	5prime_fragment	FALSE	6	0	6	0	2	0	0	0	1	0	14	3	5	0	0	1.69062	0	1.10379	0	1.42764	0	0	0	0.553717	0	6.12249	1.93182	1.7214	0	0	6
4054	TJP1	novel_not_in_catalog	novel_exon	FALSE	6	6	0	2	5	3	0	0	6	2	0	0	0	1	1	1.69062	1.14656	0	0.456341	3.56909	2.94241	0	0	3.3223	0.990186	0	0	0	0.418177	0.450192	5
4058	HERC2	incomplete-splice_match	5prime_fragment	FALSE	1	4	3	1	1	2	0	0	5	1	3	4	5	2	4	0.28177	0.764376	0.551895	0.228171	0.713818	1.96161	0	0	2.76858	0.495093	1.31196	2.57576	1.7214	0.836354	1.80077	6
4060	ENSG00000282368	incomplete-splice_match	3prime_fragment	FALSE	4	4	3	0	0	2	0	2	0	2	0	3	5	2	0	1.12708	0.764376	0.551895	0	0	1.96161	0	4.27085	0	0.990186	0	1.93182	1.7214	0.836354	0	5
4063	RPH3AL-AS1	full-splice_match	mono-exon	FALSE	1	2	6	0	0	0	3	3	0	1	4	1	2	0	4	0.28177	0.382188	1.10379	0	0	0	4.87934	6.40627	0	0.495093	1.74928	0.643941	0.688558	0	1.80077	5
4064	LINC02210	full-splice_match	reference_match	FALSE	5	0	2	3	0	4	0	1	2	0	3	7	5	6	3	1.40885	0	0.36793	0.684512	0	3.92321	0	2.13542	1.10743	0	1.31196	4.50759	1.7214	2.50906	1.35058	9
4066	LINC02210	full-splice_match	alternative_3end	FALSE	1	0	1	5	5	0	0	1	2	0	2	7	1	4	4	0.28177	0	0.183965	1.14085	3.56909	0	0	2.13542	1.10743	0	0.874642	4.50759	0.344279	1.67271	1.80077	7
4068	LINC02210	full-splice_match	mono-exon	FALSE	15	19	11	33	12	20	13	13	15	21	34	19	31	9	31	4.22655	3.63079	2.02361	7.52963	8.56581	19.6161	21.1438	27.7605	8.30575	10.397	14.8689	12.2349	10.6727	3.76359	13.956	15
4069	MAPT	incomplete-splice_match	5prime_fragment	FALSE	38	0	11	13	21	25	9	12	7	7	34	26	6	17	10	10.7072	0	2.02361	2.96622	14.9902	24.5201	14.638	25.6251	3.87602	3.46565	14.8689	16.7425	2.06567	7.10901	4.50192	14
4070	MAPT	full-splice_match	alternative_5end	FALSE	27	0	45	107	0	19	0	0	0	0	64	10	0	0	26	7.60778	0	8.27842	24.4143	0	18.6353	0	0	0	0	27.9885	6.43941	0	0	11.705	7
4071	MAPT	full-splice_match	alternative_3end5end	FALSE	9	0	10	170	51	1	0	0	0	0	0	74	0	7	0	2.53593	0	1.83965	38.789	36.4047	0.980804	0	0	0	0	0	47.6516	0	2.92724	0	6
4073	MAPT	full-splice_match	alternative_3end5end	FALSE	38	0	30	2	4	0	0	0	0	0	3	0	100	1	0	10.7072	0	5.51895	0.456341	2.85527	0	0	0	0	0	1.31196	0	34.4279	0.418177	0	5
4074	MAPT	incomplete-splice_match	5prime_fragment	FALSE	7	0	1	5	2	0	1	0	0	0	0	0	0	3	0	1.97239	0	0.183965	1.14085	1.42764	0	1.62645	0	0	0	0	0	0	1.25453	0	5
4075	MAPT	novel_not_in_catalog	novel_exon	FALSE	8	0	7	3	0	0	0	0	0	0	3	2	0	9	0	2.25416	0	1.28775	0.684512	0	0	0	0	0	0	1.31196	1.28788	0	3.76359	0	5
4078	MAPT	novel_in_catalog	combination_of_known_junctions	FALSE	7	0	3	0	4	0	0	0	0	19	0	0	87	67	0	1.97239	0	0.551895	0	2.85527	0	0	0	0	9.40677	0	0	29.9523	28.0179	0	5
4079	MAPT	incomplete-splice_match	5prime_fragment	FALSE	4	0	5	10	2	0	0	0	0	0	2	2	4	0	0	1.12708	0	0.919825	2.28171	1.42764	0	0	0	0	0	0.874642	1.28788	1.37712	0	0	5
4082	MAPT	incomplete-splice_match	5prime_fragment	FALSE	1	0	0	5	4	0	0	0	1	0	4	5	2	4	0	0.28177	0	0	1.14085	2.85527	0	0	0	0.553717	0	1.74928	3.21971	0.688558	1.67271	0	5
4083	MAPT-IT1	full-splice_match	mono-exon	FALSE	3	3	4	15	7	8	2	5	2	8	18	9	14	16	8	0.845309	0.573282	0.73586	3.42256	4.99672	7.84643	3.25289	10.6771	1.10743	3.96075	7.87177	5.79547	4.81991	6.69083	3.60154	12
4084	Metazoa_SRP	full-splice_match	mono-exon	FALSE	10	6	10	16	2	8	2	6	17	12	18	9	9	4	13	2.8177	1.14656	1.83965	3.65073	1.42764	7.84643	3.25289	12.8125	9.41318	5.94112	7.87177	5.79547	3.09851	1.67271	5.8525	15
4087	MAPT	full-splice_match	mono-exon	FALSE	8	2	6	16	12	4	6	5	10	6	10	19	6	10	8	2.25416	0.382188	1.10379	3.65073	8.56581	3.92321	9.75868	10.6771	5.53717	2.97056	4.37321	12.2349	2.06567	4.18177	3.60154	14
4094	KANSL1-AS1	full-splice_match	reference_match	FALSE	18	9	44	3	1	0	0	0	0	5	1	0	0	2	4	5.07185	1.71985	8.09446	0.684512	0.713818	0	0	0	0	2.47547	0.437321	0	0	0.836354	1.80077	5
4105	LRRC37A2	incomplete-splice_match	3prime_fragment	FALSE	10	0	5	8	0	2	0	2	0	0	11	2	0	14	14	2.8177	0	0.919825	1.82536	0	1.96161	0	4.27085	0	0	4.81053	1.28788	0	5.85448	6.30269	8
4108	NSFP1	incomplete-splice_match	5prime_fragment	FALSE	11	9	16	8	5	1	3	2	1	2	6	4	8	3	0	3.09947	1.71985	2.94344	1.82536	3.56909	0.980804	4.87934	4.27085	0.553717	0.990186	2.62392	2.57576	2.75423	1.25453	0	11
4110	NSFP1	incomplete-splice_match	5prime_fragment	FALSE	5	0	0	0	1	0	1	0	2	2	0	2	0	0	0	1.40885	0	0	0	0.713818	0	1.62645	0	1.10743	0.990186	0	1.28788	0	0	0	4
4111	NSFP1	incomplete-splice_match	5prime_fragment	FALSE	23	19	31	6	10	0	3	0	6	0	13	5	12	14	0	6.4807	3.63079	5.70291	1.36902	7.13818	0	4.87934	0	3.3223	0	5.68517	3.21971	4.13135	5.85448	0	11
4112	NSF	incomplete-splice_match	5prime_fragment	FALSE	4	2	5	2	2	1	0	2	0	2	3	1	6	2	1	1.12708	0.382188	0.919825	0.456341	1.42764	0.980804	0	4.27085	0	0.990186	1.31196	0.643941	2.06567	0.836354	0.450192	5
4114	NSF	incomplete-splice_match	5prime_fragment	FALSE	1	0	9	1	2	1	0	2	5	1	2	6	3	1	5	0.28177	0	1.65568	0.228171	1.42764	0.980804	0	4.27085	2.76858	0.495093	0.874642	3.86365	1.03284	0.418177	2.25096	7
4122	NSF	incomplete-splice_match	3prime_fragment	FALSE	6	0	2	0	1	0	1	0	6	0	0	2	2	14	138	1.69062	0	0.36793	0	0.713818	0	1.62645	0	3.3223	0	0	1.28788	0.688558	5.85448	62.1265	6
4124	NSF	incomplete-splice_match	3prime_fragment	FALSE	127	0	0	0	0	0	0	0	2	1	1	4	98	3	0	35.7847	0	0	0	0	0	0	0	1.10743	0.495093	0.437321	2.57576	33.7394	1.25453	0	5
4126	LINC02210	full-splice_match	reference_match	FALSE	13	0	3	0	0	2	9	0	0	1	18	2	19	0	0	3.66301	0	0.551895	0	0	1.96161	14.638	0	0	0.495093	7.87177	1.28788	6.5413	0	0	6
4128	MAPT-AS1	full-splice_match	alternative_3end5end	FALSE	5	7	9	1	0	0	1	0	0	0	2	0	3	2	0	1.40885	1.33766	1.65568	0.228171	0	0	1.62645	0	0	0	0.874642	0	1.03284	0.836354	0	5
4133	KANSL1	full-splice_match	mono-exon	FALSE	48	0	4	0	77	0	42	1	0	2	127	2	170	96	1	13.5249	0	0.73586	0	54.964	0	68.3108	2.13542	0	0.990186	55.5397	1.28788	58.5274	40.145	0.450192	8
4136	PLEKHM1	incomplete-splice_match	5prime_fragment	FALSE	7	13	6	9	6	4	2	0	3	1	5	5	1	5	5	1.97239	2.48422	1.10379	2.05354	4.28291	3.92321	3.25289	0	1.66115	0.495093	2.1866	3.21971	0.344279	2.09089	2.25096	12
4138	KANSL1	incomplete-splice_match	5prime_fragment	FALSE	13	11	24	9	1	12	0	3	6	5	9	2	22	10	5	3.66301	2.10204	4.41516	2.05354	0.713818	11.7696	0	6.40627	3.3223	2.47547	3.93589	1.28788	7.57414	4.18177	2.25096	13
4139	KANSL1	full-splice_match	alternative_3end	FALSE	7	8	10	4	5	4	1	0	1	3	1	3	4	5	3	1.97239	1.52875	1.83965	0.912682	3.56909	3.92321	1.62645	0	0.553717	1.48528	0.437321	1.93182	1.37712	2.09089	1.35058	11
4143	KANSL1	incomplete-splice_match	5prime_fragment	FALSE	2	2	8	0	1	1	0	2	1	2	3	2	1	2	1	0.563539	0.382188	1.47172	0	0.713818	0.980804	0	4.27085	0.553717	0.990186	1.31196	1.28788	0.344279	0.836354	0.450192	4
4148	ARHGAP27	full-splice_match	mono-exon	FALSE	2	0	3	1	2	2	2	0	1	3	2	1	4	0	1	0.563539	0	0.551895	0.228171	1.42764	1.96161	3.25289	0	0.553717	1.48528	0.874642	0.643941	1.37712	0	0.450192	5
4150	ARL17B	incomplete-splice_match	5prime_fragment	FALSE	6	0	5	0	1	5	0	0	0	0	5	2	0	1	0	1.69062	0	0.919825	0	0.713818	4.90402	0	0	0	0	2.1866	1.28788	0	0.418177	0	4
4151	ARL17B	incomplete-splice_match	5prime_fragment	FALSE	23	0	1	20	0	34	0	0	0	1	28	0	1	42	1	6.4807	0	0.183965	4.56341	0	33.3473	0	0	0	0.495093	12.245	0	0.344279	17.5634	0.450192	5
4154	RPS7P11	full-splice_match	mono-exon	FALSE	1	1	2	3	1	2	1	0	3	3	5	6	1	1	1	0.28177	0.191094	0.36793	0.684512	0.713818	1.96161	1.62645	0	1.66115	1.48528	2.1866	3.86365	0.344279	0.418177	0.450192	6
4156	WNT3	full-splice_match	alternative_3end5end	FALSE	3	0	0	0	1	1	0	0	0	0	16	2	7	0	7	0.845309	0	0	0	0.713818	0.980804	0	0	0	0	6.99713	1.28788	2.40995	0	3.15134	4
4162	TIMM22	full-splice_match	alternative_3end	FALSE	17	40	28	42	3	2	0	0	4	7	0	0	18	6	12	4.79008	7.64376	5.15102	9.58316	2.14145	1.96161	0	0	2.21487	3.46565	0	0	6.19702	2.50906	5.40231	11
4164	TIMM22	incomplete-splice_match	5prime_fragment	FALSE	6	0	6	0	1	0	0	1	0	2	2	0	2	4	0	1.69062	0	1.10379	0	0.713818	0	0	2.13542	0	0.990186	0.874642	0	0.688558	1.67271	0	4
4178	ENSG00000282460	full-splice_match	mono-exon	FALSE	4	1	0	3	0	2	0	0	0	1	1	0	3	2	4	1.12708	0.191094	0	0.684512	0	1.96161	0	0	0	0.495093	0.437321	0	1.03284	0.836354	1.80077	4
4188	CLN8	full-splice_match	alternative_3end5end	FALSE	7	9	16	7	0	1	0	0	5	0	0	0	0	8	0	1.97239	1.71985	2.94344	1.59719	0	0.980804	0	0	2.76858	0	0	0	0	3.34542	0	6
4191	CLN8-AS1	full-splice_match	alternative_3end	FALSE	131	152	189	84	16	7	4	5	38	30	17	35	45	21	24	36.9118	29.0463	34.7694	19.1663	11.4211	6.86563	6.50579	10.6771	21.0412	14.8528	7.43445	22.5379	15.4926	8.78172	10.8046	15
4196	SMDT1	full-splice_match	alternative_3end	FALSE	29	19	61	8	18	8	4	0	8	7	3	3	17	5	32	8.17132	3.63079	11.2219	1.82536	12.8487	7.84643	6.50579	0	4.42973	3.46565	1.31196	1.93182	5.85274	2.09089	14.4061	14
4201	SMDT1	full-splice_match	alternative_3end	FALSE	149	160	210	104	23	20	11	6	61	86	109	53	110	79	30	41.9837	30.5751	38.6326	23.7297	16.4178	19.6161	17.8909	12.8125	33.7767	42.578	47.668	34.1289	37.8707	33.036	13.5058	15
4208	NDUFA6	full-splice_match	alternative_3end	FALSE	89	57	60	50	8	4	2	3	7	34	31	7	25	44	12	25.0775	10.8924	11.0379	11.4085	5.71054	3.92321	3.25289	6.40627	3.87602	16.8332	13.5569	4.50759	8.60698	18.3998	5.40231	15
4213	OLA1P1	full-splice_match	mono-exon	FALSE	2	6	5	4	3	1	0	1	1	0	3	1	3	4	2	0.563539	1.14656	0.919825	0.912682	2.14145	0.980804	0	2.13542	0.553717	0	1.31196	0.643941	1.03284	1.67271	0.900384	6
4218	MUC20	full-splice_match	alternative_5end	FALSE	2	0	0	16	1	0	0	0	4	1	0	0	5	8	0	0.563539	0	0	3.65073	0.713818	0	0	0	2.21487	0.495093	0	0	1.7214	3.34542	0	4
4225	MUC20-OT1	full-splice_match	mono-exon	FALSE	3	1	4	0	0	1	0	1	2	0	4	0	3	2	10	0.845309	0.191094	0.73586	0	0	0.980804	0	2.13542	1.10743	0	1.74928	0	1.03284	0.836354	4.50192	5
4240	TFPT	full-splice_match	reference_match	FALSE	14	6	14	9	0	0	3	0	0	4	10	0	5	4	0	3.94478	1.14656	2.57551	2.05354	0	0	4.87934	0	0	1.98037	4.37321	0	1.7214	1.67271	0	9
4241	PRPF31	full-splice_match	alternative_5end	FALSE	10	16	13	0	0	0	0	0	12	0	0	0	0	0	0	2.8177	3.05751	2.39154	0	0	0	0	0	6.6446	0	0	0	0	0	0	4
4248	LENG1	full-splice_match	reference_match	FALSE	6	9	14	0	1	2	0	0	2	0	2	0	6	5	0	1.69062	1.71985	2.57551	0	0.713818	1.96161	0	0	1.10743	0	0.874642	0	2.06567	2.09089	0	7
4249	RPS9	full-splice_match	alternative_5end	FALSE	606	777	729	212	32	36	17	18	204	111	109	91	166	211	135	170.752	148.48	134.11	48.3722	22.8422	35.3089	27.6496	38.4376	112.958	54.9553	47.668	58.5986	57.1503	88.2354	60.7759	15
4275	TTYH1	full-splice_match	reference_match	FALSE	48	231	26	193	8	9	0	38	22	42	94	1	0	11	160	13.5249	44.1427	4.78309	44.0369	5.71054	8.82723	0	81.1461	12.1818	20.7939	41.1082	0.643941	0	4.59995	72.0307	12
4280	TTYH1	incomplete-splice_match	intron_retention	FALSE	15	24	0	17	0	0	0	0	16	0	0	0	0	0	0	4.22655	4.58626	0	3.8789	0	0	0	0	8.85947	0	0	0	0	0	0	4
4283	ENSG00000275797	full-splice_match	mono-exon	FALSE	1	3	3	6	13	8	0	3	2	6	12	6	1	1	25	0.28177	0.573282	0.551895	1.36902	9.27963	7.84643	0	6.40627	1.10743	2.97056	5.24785	3.86365	0.344279	0.418177	11.2548	9
4285	LENG9	full-splice_match	mono-exon	FALSE	4	4	11	6	9	4	24	3	2	4	2	5	6	5	0	1.12708	0.764376	2.02361	1.36902	6.42436	3.92321	39.0347	6.40627	1.10743	1.98037	0.874642	3.21971	2.06567	2.09089	0	12
4300	RPS6KA1	incomplete-splice_match	intron_retention	FALSE	70	0	2	1	0	0	1	0	0	38	0	0	88	0	0	19.7239	0	0.36793	0.228171	0	0	1.62645	0	0	18.8135	0	0	30.2966	0	0	4
4306	SLC16A1	full-splice_match	alternative_3end5end	FALSE	27	26	28	35	0	4	0	0	0	0	17	0	12	9	0	7.60778	4.96845	5.15102	7.98597	0	3.92321	0	0	0	0	7.43445	0	4.13135	3.76359	0	8
4309	SLC16A1	full-splice_match	alternative_3end5end	FALSE	13	17	19	12	1	2	0	2	8	3	5	4	3	6	6	3.66301	3.2486	3.49533	2.73805	0.713818	1.96161	0	4.27085	4.42973	1.48528	2.1866	2.57576	1.03284	2.50906	2.70115	13
4311	ZNF852	full-splice_match	mono-exon	FALSE	2	2	1	0	2	1	1	1	4	0	3	4	4	3	10	0.563539	0.382188	0.183965	0	1.42764	0.980804	1.62645	2.13542	2.21487	0	1.31196	2.57576	1.37712	1.25453	4.50192	9
4315	ZNF660	full-splice_match	alternative_5end	FALSE	4	6	1	0	0	0	2	1	5	0	1	1	2	3	2	1.12708	1.14656	0.183965	0	0	0	3.25289	2.13542	2.76858	0	0.437321	0.643941	0.688558	1.25453	0.900384	6
4318	ZNF35	full-splice_match	alternative_3end	FALSE	5	0	2	0	2	0	0	0	2	3	0	1	1	0	1	1.40885	0	0.36793	0	1.42764	0	0	0	1.10743	1.48528	0	0.643941	0.344279	0	0.450192	4
4321	ENSG00000281102	full-splice_match	mono-exon	FALSE	8	10	16	22	5	6	1	2	7	15	13	1	19	7	14	2.25416	1.91094	2.94344	5.01975	3.56909	5.88482	1.62645	4.27085	3.87602	7.4264	5.68517	0.643941	6.5413	2.92724	6.30269	14
4322	ZNF852	full-splice_match	reference_match	FALSE	14	29	4	19	11	12	2	0	23	19	15	10	32	16	6	3.94478	5.54173	0.73586	4.33524	7.85199	11.7696	3.25289	0	12.7355	9.40677	6.55981	6.43941	11.0169	6.69083	2.70115	13
4325	ZKSCAN7-AS1	incomplete-splice_match	5prime_fragment	FALSE	6	5	4	2	2	1	2	1	4	1	6	8	2	3	1	1.69062	0.95547	0.73586	0.456341	1.42764	0.980804	3.25289	2.13542	2.21487	0.495093	2.62392	5.15153	0.688558	1.25453	0.450192	8
4332	KIAA1143	full-splice_match	alternative_3end5end	FALSE	44	57	86	49	0	3	0	0	21	6	16	28	10	6	20	12.3979	10.8924	15.821	11.1804	0	2.94241	0	0	11.628	2.97056	6.99713	18.0304	3.44279	2.50906	9.00384	12
4334	KIAA1143	incomplete-splice_match	5prime_fragment	FALSE	15	17	13	16	2	1	0	4	4	3	10	8	0	9	5	4.22655	3.2486	2.39154	3.65073	1.42764	0.980804	0	8.5417	2.21487	1.48528	4.37321	5.15153	0	3.76359	2.25096	12
4336	TMEM42	full-splice_match	alternative_5end	FALSE	61	80	85	6	0	0	0	0	2	0	41	43	2	2	2	17.1879	15.2875	15.637	1.36902	0	0	0	0	1.10743	0	17.9302	27.6895	0.688558	0.836354	0.900384	7
4338	TMEM42	novel_not_in_catalog	Alt3,Alt5	FALSE	6	17	12	5	0	0	0	16	1	11	0	1	64	2	64	1.69062	3.2486	2.20758	1.14085	0	0	0	34.1668	0.553717	5.44602	0	0.643941	22.0339	0.836354	28.8123	8
4347	RPL7A	full-splice_match	reference_match	FALSE	1290	1698	2251	982	239	178	124	49	604	711	775	548	985	837	662	363.483	324.478	414.105	224.064	170.602	174.583	201.679	104.636	334.445	352.011	338.924	352.88	339.115	350.014	298.027	15
4349	RPL7A	incomplete-splice_match	intron_retention	FALSE	7	2	5	4	5	0	0	0	3	0	6	4	4	0	4	1.97239	0.382188	0.919825	0.912682	3.56909	0	0	0	1.66115	0	2.62392	2.57576	1.37712	0	1.80077	7
4350	RPL7A	full-splice_match	reference_match	FALSE	15	11	14	4	2	4	1	2	8	14	3	3	8	13	13	4.22655	2.10204	2.57551	0.912682	1.42764	3.92321	1.62645	4.27085	4.42973	6.9313	1.31196	1.93182	2.75423	5.4363	5.8525	14
4355	RPL7A	incomplete-splice_match	5prime_fragment	FALSE	3	6	7	1	0	0	1	1	2	6	0	2	0	6	1	0.845309	1.14656	1.28775	0.228171	0	0	1.62645	2.13542	1.10743	2.97056	0	1.28788	0	2.50906	0.450192	8
4357	RPL7A	incomplete-splice_match	5prime_fragment	FALSE	42	22	38	11	12	13	18	8	20	12	57	22	29	25	21	11.8343	4.20407	6.99067	2.50988	8.56581	12.7504	29.2761	17.0834	11.0743	5.94112	24.9273	14.1667	9.98409	10.4544	9.45403	15
4361	RPL7A	incomplete-splice_match	3prime_fragment	FALSE	2	7	5	6	0	0	0	0	3	0	3	1	2	6	0	0.563539	1.33766	0.919825	1.36902	0	0	0	0	1.66115	0	1.31196	0.643941	0.688558	2.50906	0	5
4363	RPL7A	incomplete-splice_match	intron_retention	FALSE	10	4	12	13	0	8	0	7	2	0	0	0	6	0	6	2.8177	0.764376	2.20758	2.96622	0	7.84643	0	14.948	1.10743	0	0	0	2.06567	0	2.70115	8
4371	SURF2	full-splice_match	reference_match	FALSE	30	48	61	44	14	8	1	0	17	25	26	19	7	35	5	8.45309	9.17252	11.2219	10.0395	9.99345	7.84643	1.62645	0	9.41318	12.3773	11.3703	12.2349	2.40995	14.6362	2.25096	14
4372	SURF2	novel_in_catalog	combination_of_known_junctions	FALSE	10	7	21	5	5	0	0	0	7	1	4	2	0	7	0	2.8177	1.33766	3.86326	1.14085	3.56909	0	0	0	3.87602	0.495093	1.74928	1.28788	0	2.92724	0	9
4381	SURF1	full-splice_match	alternative_3end	FALSE	43	99	107	18	13	8	0	0	19	32	24	14	29	11	26	12.1161	18.9183	19.6842	4.10707	9.27963	7.84643	0	0	10.5206	15.843	10.4957	9.01518	9.98409	4.59995	11.705	13
4382	SURF1	full-splice_match	alternative_5end	FALSE	55	23	33	6	6	2	6	5	3	15	7	17	0	14	37	15.4973	4.39516	6.07084	1.36902	4.28291	1.96161	9.75868	10.6771	1.66115	7.4264	3.06125	10.947	0	5.85448	16.6571	14
4384	SURF1	full-splice_match	reference_match	FALSE	17	18	22	67	0	0	0	0	3	4	2	1	2	11	1	4.79008	3.43969	4.04723	15.2874	0	0	0	0	1.66115	1.98037	0.874642	0.643941	0.688558	4.59995	0.450192	7
4388	SURF1	incomplete-splice_match	3prime_fragment	FALSE	1	0	0	2	2	0	3	7	0	0	3	2	0	0	2	0.28177	0	0	0.456341	1.42764	0	4.87934	14.948	0	0	1.31196	1.28788	0	0	0.900384	5
4390	SURF4	full-splice_match	alternative_3end	FALSE	3	60	53	0	3	2	0	0	9	6	14	0	21	204	20	0.845309	11.4656	9.75014	0	2.14145	1.96161	0	0	4.98345	2.97056	6.12249	0	7.22986	85.3081	9.00384	10
4398	STKLD1	novel_in_catalog	combination_of_known_splicesites	FALSE	2	4	0	0	5	2	6	2	4	0	2	6	1	1	5	0.563539	0.764376	0	0	3.56909	1.96161	9.75868	4.27085	2.21487	0	0.874642	3.86365	0.344279	0.418177	2.25096	7
4404	ADAMTS13	incomplete-splice_match	3prime_fragment	FALSE	1	0	1	1	1	12	18	1	7	0	0	0	0	0	1	0.28177	0	0.183965	0.228171	0.713818	11.7696	29.2761	2.13542	3.87602	0	0	0	0	0	0.450192	4
4407	CACFD1	full-splice_match	alternative_3end	FALSE	1	5	7	0	11	1	1	0	0	0	2	4	2	7	18	0.28177	0.95547	1.28775	0	7.85199	0.980804	1.62645	0	0	0	0.874642	2.57576	0.688558	2.92724	8.10346	6
4409	SLC2A6	incomplete-splice_match	3prime_fragment	FALSE	26	0	17	48	0	0	0	0	0	0	64	0	0	0	0	7.32601	0	3.1274	10.9522	0	0	0	0	0	0	27.9885	0	0	0	0	4
4412	KAT6B	incomplete-splice_match	5prime_fragment	FALSE	46	32	59	15	25	30	13	10	15	14	34	19	21	17	17	12.9614	6.11501	10.8539	3.42256	17.8454	29.4241	21.1438	21.3542	8.30575	6.9313	14.8689	12.2349	7.22986	7.10901	7.65327	15
4417	KAT6B	full-splice_match	alternative_3end	FALSE	16	16	14	20	4	0	4	5	7	0	11	5	14	9	7	4.50831	3.05751	2.57551	4.56341	2.85527	0	6.50579	10.6771	3.87602	0	4.81053	3.21971	4.81991	3.76359	3.15134	13
4418	KAT6B	full-splice_match	alternative_3end5end	FALSE	4	7	4	5	0	0	0	0	0	3	0	0	5	0	4	1.12708	1.33766	0.73586	1.14085	0	0	0	0	0	1.48528	0	0	1.7214	0	1.80077	6
4423	KAT6B	incomplete-splice_match	5prime_fragment	FALSE	13	20	26	5	2	9	1	4	4	5	3	9	4	0	2	3.66301	3.82188	4.78309	1.14085	1.42764	8.82723	1.62645	8.5417	2.21487	2.47547	1.31196	5.79547	1.37712	0	0.900384	13
4429	CENATAC	incomplete-splice_match	5prime_fragment	FALSE	1	0	0	0	0	4	2	0	2	0	3	2	5	2	0	0.28177	0	0	0	0	3.92321	3.25289	0	1.10743	0	1.31196	1.28788	1.7214	0.836354	0	6
4431	CENATAC	full-splice_match	alternative_3end5end	FALSE	27	26	50	11	6	7	3	3	12	5	8	14	2	11	11	7.60778	4.96845	9.19825	2.50988	4.28291	6.86563	4.87934	6.40627	6.6446	2.47547	3.49857	9.01518	0.688558	4.59995	4.95211	14
4437	TRAPPC4	full-splice_match	alternative_3end5end	FALSE	114	90	0	159	29	28	0	2	27	61	10	51	73	34	102	32.1217	17.1985	0	36.2791	20.7007	27.4625	0	4.27085	14.9503	30.2007	4.37321	32.841	25.1324	14.218	45.9196	13
4439	TRAPPC4	full-splice_match	alternative_5end	FALSE	13	7	26	2	0	2	0	9	1	1	47	0	3	0	0	3.66301	1.33766	4.78309	0.456341	0	1.96161	0	19.2188	0.553717	0.495093	20.5541	0	1.03284	0	0	7
4445	HYOU1	incomplete-splice_match	5prime_fragment	FALSE	12	6	22	7	6	1	4	4	0	5	8	4	4	11	3	3.38124	1.14656	4.04723	1.59719	4.28291	0.980804	6.50579	8.5417	0	2.47547	3.49857	2.57576	1.37712	4.59995	1.35058	13
4446	HYOU1	incomplete-splice_match	5prime_fragment	FALSE	19	16	8	2	1	3	2	0	3	2	3	7	10	6	2	5.35362	3.05751	1.47172	0.456341	0.713818	2.94241	3.25289	0	1.66115	0.990186	1.31196	4.50759	3.44279	2.50906	0.900384	10
4448	RPS25	full-splice_match	alternative_3end5end	FALSE	1799	2011	2977	1014	197	162	61	66	572	471	684	404	778	929	569	506.904	384.29	547.664	231.365	140.622	158.89	99.2133	140.938	316.726	233.189	299.127	260.152	267.849	388.487	256.159	15
4449	RPS25	novel_in_catalog	combination_of_known_splicesites	FALSE	8	3	16	3	3	0	1	1	3	2	3	4	2	8	1	2.25416	0.573282	2.94344	0.684512	2.14145	0	1.62645	2.13542	1.66115	0.990186	1.31196	2.57576	0.688558	3.34542	0.450192	9
4450	RPS25	full-splice_match	reference_match	FALSE	16	17	31	4	1	4	0	0	4	8	5	3	4	9	1	4.50831	3.2486	5.70291	0.912682	0.713818	3.92321	0	0	2.21487	3.96075	2.1866	1.93182	1.37712	3.76359	0.450192	10
4452	RPS25	novel_in_catalog	combination_of_known_junctions,intron_retention	FALSE	6	6	9	4	2	4	0	0	2	4	0	7	0	3	8	1.69062	1.14656	1.65568	0.912682	1.42764	3.92321	0	0	1.10743	1.98037	0	4.50759	0	1.25453	3.60154	10
4453	RPS25	novel_in_catalog	combination_of_known_junctions,intron_retention	FALSE	2	9	5	0	0	1	0	0	4	2	11	0	5	2	3	0.563539	1.71985	0.919825	0	0	0.980804	0	0	2.21487	0.990186	4.81053	0	1.7214	0.836354	1.35058	5
4455	RPS25	incomplete-splice_match	3prime_fragment	FALSE	3	5	4	4	1	0	0	1	3	1	5	3	2	3	1	0.845309	0.95547	0.73586	0.912682	0.713818	0	0	2.13542	1.66115	0.495093	2.1866	1.93182	0.688558	1.25453	0.450192	5
4460	RPS25	incomplete-splice_match	5prime_fragment	FALSE	4	8	11	4	2	2	0	0	3	1	4	3	8	4	6	1.12708	1.52875	2.02361	0.912682	1.42764	1.96161	0	0	1.66115	0.495093	1.74928	1.93182	2.75423	1.67271	2.70115	11
4462	RPS25	incomplete-splice_match	5prime_fragment	FALSE	7	6	8	2	0	0	0	1	1	3	1	1	2	4	3	1.97239	1.14656	1.47172	0.456341	0	0	0	2.13542	0.553717	1.48528	0.437321	0.643941	0.688558	1.67271	1.35058	7
4463	RPS25	full-splice_match	alternative_3end5end	FALSE	6	2	2	3	3	0	1	1	2	2	1	1	4	3	8	1.69062	0.382188	0.36793	0.684512	2.14145	0	1.62645	2.13542	1.10743	0.990186	0.437321	0.643941	1.37712	1.25453	3.60154	8
4473	VPS11-DT	full-splice_match	mono-exon	FALSE	35	35	28	25	23	30	17	10	25	11	17	36	17	28	31	9.86194	6.68829	5.15102	5.70426	16.4178	29.4241	27.6496	21.3542	13.8429	5.44602	7.43445	23.1819	5.85274	11.709	13.956	15
4475	VPS11	incomplete-splice_match	intron_retention	FALSE	124	1	1	155	4	0	0	0	38	96	0	102	164	3	0	34.9394	0.191094	0.183965	35.3664	2.85527	0	0	0	21.0412	47.5289	0	65.682	56.4618	1.25453	0	8
4478	ENSG00000281677	full-splice_match	mono-exon	FALSE	8	13	6	14	17	5	6	0	0	10	34	14	18	13	15	2.25416	2.48422	1.10379	3.19439	12.1349	4.90402	9.75868	0	0	4.95093	14.8689	9.01518	6.19702	5.4363	6.75288	13
4479	DYRK1B	incomplete-splice_match	3prime_fragment	FALSE	2	0	0	0	11	0	8	0	35	0	0	34	92	28	0	0.563539	0	0	0	7.85199	0	13.0116	0	19.3801	0	0	21.894	31.6737	11.709	0	6
4484	FBL	full-splice_match	reference_match	FALSE	48	75	60	82	0	1	0	0	0	30	0	39	0	52	0	13.5249	14.3321	11.0379	18.71	0	0.980804	0	0	0	14.8528	0	25.1137	0	21.7452	0	7
4485	FBL	incomplete-splice_match	5prime_fragment	FALSE	11	7	8	3	0	0	0	0	0	2	2	3	2	0	0	3.09947	1.33766	1.47172	0.684512	0	0	0	0	0	0.990186	0.874642	1.93182	0.688558	0	0	4
4486	FBL	incomplete-splice_match	3prime_fragment	FALSE	4	3	1	1	1	8	2	2	0	0	5	2	4	1	1	1.12708	0.573282	0.183965	0.228171	0.713818	7.84643	3.25289	4.27085	0	0	2.1866	1.28788	1.37712	0.418177	0.450192	7
4487	FCGBP	incomplete-splice_match	3prime_fragment	FALSE	8	0	0	0	0	0	0	4	0	0	0	0	27	0	4	2.25416	0	0	0	0	0	0	8.5417	0	0	0	0	9.29554	0	1.80077	4
4491	PSMC4	incomplete-splice_match	5prime_fragment	FALSE	25	18	27	9	5	6	2	5	7	0	20	7	13	15	9	7.04424	3.43969	4.96705	2.05354	3.56909	5.88482	3.25289	10.6771	3.87602	0	8.74642	4.50759	4.47563	6.27266	4.05173	14
4492	PSMC4	full-splice_match	alternative_3end	FALSE	106	163	170	221	15	16	0	0	65	79	95	63	39	77	64	29.8676	31.1483	31.274	50.4257	10.7073	15.6929	0	0	35.9916	39.1124	41.5455	40.5683	13.4269	32.1996	28.8123	13
4493	PSMC4	full-splice_match	reference_match	FALSE	3	0	0	0	2	0	0	0	0	5	0	0	4	0	5	0.845309	0	0	0	1.42764	0	0	0	0	2.47547	0	0	1.37712	0	2.25096	4
4497	ZNF546	incomplete-splice_match	5prime_fragment	FALSE	4	2	6	0	0	3	1	2	1	3	0	1	0	1	0	1.12708	0.382188	1.10379	0	0	2.94241	1.62645	4.27085	0.553717	1.48528	0	0.643941	0	0.418177	0	6
4512	NDUFA6	full-splice_match	reference_match	FALSE	206	120	203	66	26	5	4	5	44	42	34	10	67	28	33	58.0446	22.9313	37.3449	15.0593	18.5593	4.90402	6.50579	10.6771	24.3635	20.7939	14.8689	6.43941	23.0667	11.709	14.8563	15
4518	OLA1P1	full-splice_match	mono-exon	FALSE	5	2	2	7	1	0	1	1	0	1	3	0	9	1	4	1.40885	0.382188	0.36793	1.59719	0.713818	0	1.62645	2.13542	0	0.495093	1.31196	0	3.09851	0.418177	1.80077	7
4521	SERTAD4-AS1	full-splice_match	alternative_5end	FALSE	7	11	6	1	4	3	0	0	0	3	11	1	4	4	2	1.97239	2.10204	1.10379	0.228171	2.85527	2.94241	0	0	0	1.48528	4.81053	0.643941	1.37712	1.67271	0.900384	9
4522	SERTAD4-AS1	full-splice_match	alternative_3end5end	FALSE	45	34	40	50	12	2	4	1	12	5	7	8	25	35	11	12.6796	6.4972	7.3586	11.4085	8.56581	1.96161	6.50579	2.13542	6.6446	2.47547	3.06125	5.15153	8.60698	14.6362	4.95211	15
4523	SERTAD4-AS1	novel_not_in_catalog	novel_exon	FALSE	15	15	24	16	3	1	0	1	6	2	7	2	8	8	4	4.22655	2.86641	4.41516	3.65073	2.14145	0.980804	0	2.13542	3.3223	0.990186	3.06125	1.28788	2.75423	3.34542	1.80077	12
4524	SERTAD4-AS1	full-splice_match	alternative_5end	FALSE	14	15	15	13	1	1	0	0	5	0	0	3	3	7	2	3.94478	2.86641	2.75947	2.96622	0.713818	0.980804	0	0	2.76858	0	0	1.93182	1.03284	2.92724	0.900384	8
4537	SCARNA5	full-splice_match	mono-exon	FALSE	9	23	31	29	3	8	5	2	16	15	8	12	33	17	19	2.53593	4.39516	5.70291	6.61695	2.14145	7.84643	8.13224	4.27085	8.85947	7.4264	3.49857	7.72729	11.3612	7.10901	8.55365	15
4549	RYBP	full-splice_match	alternative_3end	FALSE	24	67	35	0	0	3	0	0	12	0	3	0	2	19	9	6.76247	12.8033	6.43877	0	0	2.94241	0	0	6.6446	0	1.31196	0	0.688558	7.94537	4.05173	8
4552	RYBP	incomplete-splice_match	5prime_fragment	FALSE	2	18	1	10	2	2	0	1	2	0	2	2	1	5	0	0.563539	3.43969	0.183965	2.28171	1.42764	1.96161	0	2.13542	1.10743	0	0.874642	1.28788	0.344279	2.09089	0	8
4554	RYBP	incomplete-splice_match	5prime_fragment	FALSE	2	3	0	5	1	3	0	0	0	3	2	2	3	6	1	0.563539	0.573282	0	1.14085	0.713818	2.94241	0	0	0	1.48528	0.874642	1.28788	1.03284	2.50906	0.450192	6
4567	LRP6	incomplete-splice_match	5prime_fragment	FALSE	9	10	31	14	2	4	5	4	9	2	8	16	7	2	1	2.53593	1.91094	5.70291	3.19439	1.42764	3.92321	8.13224	8.5417	4.98345	0.990186	3.49857	10.3031	2.40995	0.836354	0.450192	12
4569	BORCS5	full-splice_match	alternative_3end	FALSE	6	10	18	0	0	6	0	0	4	7	2	1	0	3	5	1.69062	1.91094	3.31137	0	0	5.88482	0	0	2.21487	3.46565	0.874642	0.643941	0	1.25453	2.25096	8
4577	BORCS5	full-splice_match	alternative_3end	FALSE	14	19	21	27	0	0	0	0	14	0	0	0	11	7	0	3.94478	3.63079	3.86326	6.16061	0	0	0	0	7.75203	0	0	0	3.78707	2.92724	0	7
4583	MANSC1	incomplete-splice_match	5prime_fragment	FALSE	8	2	7	0	3	0	1	1	1	1	2	5	3	5	2	2.25416	0.382188	1.28775	0	2.14145	0	1.62645	2.13542	0.553717	0.495093	0.874642	3.21971	1.03284	2.09089	0.900384	8
4585	LOH12CR2	full-splice_match	alternative_3end	FALSE	1	3	24	13	4	3	0	2	4	0	0	5	7	0	5	0.28177	0.573282	4.41516	2.96622	2.85527	2.94241	0	4.27085	2.21487	0	0	3.21971	2.40995	0	2.25096	9
4590	DUSP16	incomplete-splice_match	internal_fragment	FALSE	7	7	3	0	0	0	0	0	5	2	0	0	0	3	2	1.97239	1.33766	0.551895	0	0	0	0	0	2.76858	0.990186	0	0	0	1.25453	0.900384	4
4602	SLC25A26	incomplete-splice_match	3prime_fragment	FALSE	3	51	12	3	1	8	0	0	2	0	0	0	28	22	0	0.845309	9.7458	2.20758	0.684512	0.713818	7.84643	0	0	1.10743	0	0	0	9.63982	9.1999	0	6
4612	SLC25A26	full-splice_match	reference_match	FALSE	5	7	28	2	9	0	0	0	18	3	0	0	1	3	3	1.40885	1.33766	5.15102	0.456341	6.42436	0	0	0	9.9669	1.48528	0	0	0.344279	1.25453	1.35058	8
4638	SCG5	full-splice_match	alternative_3end5end	FALSE	12	8	0	0	0	0	23	0	0	60	0	52	0	110	0	3.38124	1.52875	0	0	0	0	37.4083	0	0	29.7056	0	33.4849	0	45.9995	0	6
4640	SCG5	full-splice_match	alternative_5end	FALSE	124	312	267	365	24	0	17	16	96	141	85	36	168	45	183	34.9394	59.6214	49.1186	83.2823	17.1316	0	27.6496	34.1668	53.1568	69.8081	37.1723	23.1819	57.8389	18.818	82.3852	14
4648	ENSG00000282670	full-splice_match	mono-exon	FALSE	4	9	5	11	0	6	3	3	6	2	3	2	2	1	7	1.12708	1.71985	0.919825	2.50988	0	5.88482	4.87934	6.40627	3.3223	0.990186	1.31196	1.28788	0.688558	0.418177	3.15134	10
4652	GREM1	full-splice_match	alternative_3end5end	FALSE	5	25	24	17	1	3	0	0	1	0	2	0	1	4	6	1.40885	4.77735	4.41516	3.8789	0.713818	2.94241	0	0	0.553717	0	0.874642	0	0.344279	1.67271	2.70115	7
4655	ENSG00000282410	full-splice_match	mono-exon	FALSE	2	2	5	0	6	10	10	0	2	1	1	1	7	1	10	0.563539	0.382188	0.919825	0	4.28291	9.80804	16.2645	0	1.10743	0.495093	0.437321	0.643941	2.40995	0.418177	4.50192	6
4661	IBTK	incomplete-splice_match	5prime_fragment	FALSE	35	39	39	2	3	1	0	0	7	17	10	4	2	4	0	9.86194	7.45267	7.17463	0.456341	2.14145	0.980804	0	0	3.87602	8.41658	4.37321	2.57576	0.688558	1.67271	0	9
4670	CFL1P1	full-splice_match	alternative_3end5end	FALSE	10	4	8	1	3	6	0	2	7	5	7	7	1	2	3	2.8177	0.764376	1.47172	0.228171	2.14145	5.88482	0	4.27085	3.87602	2.47547	3.06125	4.50759	0.344279	0.836354	1.35058	10
4673	novelGene_CFL1P1_AS	antisense	multi-exon	FALSE	22	16	39	8	7	6	2	3	10	1	5	6	13	11	15	6.19893	3.05751	7.17463	1.82536	4.99672	5.88482	3.25289	6.40627	5.53717	0.495093	2.1866	3.86365	4.47563	4.59995	6.75288	14
4675	novelGene_CFL1P1_AS	antisense	multi-exon	FALSE	7	8	3	5	1	1	0	0	5	0	2	8	2	2	6	1.97239	1.52875	0.551895	1.14085	0.713818	0.980804	0	0	2.76858	0	0.874642	5.15153	0.688558	0.836354	2.70115	6
4678	novelGene_CFL1P1_AS	antisense	multi-exon	FALSE	32	23	13	18	0	0	3	2	6	8	20	11	0	25	25	9.01663	4.39516	2.39154	4.10707	0	0	4.87934	4.27085	3.3223	3.96075	8.74642	7.08335	0	10.4544	11.2548	12
4682	RPL11P3	full-splice_match	mono-exon	FALSE	1	3	3	1	0	2	0	0	0	2	13	3	15	0	2	0.28177	0.573282	0.551895	0.228171	0	1.96161	0	0	0	0.990186	5.68517	1.93182	5.16419	0	0.900384	4
4683	PTEN	full-splice_match	alternative_3end5end	FALSE	4	34	15	0	0	0	0	0	0	10	0	0	10	6	0	1.12708	6.4972	2.75947	0	0	0	0	0	0	4.95093	0	0	3.44279	2.50906	0	6
4685	PTEN	full-splice_match	alternative_3end5end	FALSE	1	2	4	2	2	1	1	1	1	0	4	0	2	0	1	0.28177	0.382188	0.73586	0.456341	1.42764	0.980804	1.62645	2.13542	0.553717	0	1.74928	0	0.688558	0	0.450192	4
4690	CALB2	incomplete-splice_match	5prime_fragment	FALSE	58	30	31	20	4	3	3	6	3	28	6	20	23	9	12	16.3426	5.73282	5.70291	4.56341	2.85527	2.94241	4.87934	12.8125	1.66115	13.8626	2.62392	12.8788	7.91842	3.76359	5.40231	15
4693	CALB2	incomplete-splice_match	5prime_fragment	FALSE	16	10	12	10	3	1	0	4	2	21	5	14	6	0	3	4.50831	1.91094	2.20758	2.28171	2.14145	0.980804	0	8.5417	1.10743	10.397	2.1866	9.01518	2.06567	0	1.35058	12
4694	CALB2	full-splice_match	reference_match	FALSE	27	26	77	0	27	0	0	0	35	161	30	85	143	54	36	7.60778	4.96845	14.1653	0	19.2731	0	0	0	19.3801	79.71	13.1196	54.735	49.2319	22.5816	16.2069	11
4699	ENSG00000283080	full-splice_match	mono-exon	FALSE	2	8	6	2	4	1	0	5	3	10	4	1	5	5	8	0.563539	1.52875	1.10379	0.456341	2.85527	0.980804	0	10.6771	1.66115	4.95093	1.74928	0.643941	1.7214	2.09089	3.60154	10
4704	ENSG00000283002	full-splice_match	mono-exon	FALSE	2	3	3	5	3	2	0	2	3	0	3	3	2	1	1	0.563539	0.573282	0.551895	1.14085	2.14145	1.96161	0	4.27085	1.66115	0	1.31196	1.93182	0.688558	0.418177	0.450192	7
4707	LINC01355	full-splice_match	mono-exon	FALSE	27	57	34	61	13	11	5	5	20	37	26	24	24	37	64	7.60778	10.8924	6.25481	13.9184	9.27963	10.7888	8.13224	10.6771	11.0743	18.3184	11.3703	15.4546	8.2627	15.4726	28.8123	15
4708	ZNF436-AS1	novel_in_catalog	combination_of_known_junctions	FALSE	16	32	17	0	2	2	2	1	4	8	3	5	0	19	1	4.50831	6.11501	3.1274	0	1.42764	1.96161	3.25289	2.13542	2.21487	3.96075	1.31196	3.21971	0	7.94537	0.450192	12
4709	ZNF436-AS1	full-splice_match	alternative_5end	FALSE	2	4	22	0	0	0	1	9	2	2	0	0	1	2	1	0.563539	0.764376	4.04723	0	0	0	1.62645	19.2188	1.10743	0.990186	0	0	0.344279	0.836354	0.450192	4
4712	ZNF436-AS1	full-splice_match	mono-exon	FALSE	14	8	9	7	7	15	3	5	3	3	11	9	5	9	9	3.94478	1.52875	1.65568	1.59719	4.99672	14.7121	4.87934	10.6771	1.66115	1.48528	4.81053	5.79547	1.7214	3.76359	4.05173	15
4715	ZNF436-AS1	full-splice_match	alternative_3end5end	FALSE	15	15	16	2	6	7	19	7	3	6	11	15	12	11	4	4.22655	2.86641	2.94344	0.456341	4.28291	6.86563	30.9025	14.948	1.66115	2.97056	4.81053	9.65912	4.13135	4.59995	1.80077	14
4716	ZNF436-AS1	full-splice_match	alternative_3end5end	FALSE	13	8	9	10	12	4	2	0	15	8	7	5	3	9	49	3.66301	1.52875	1.65568	2.28171	8.56581	3.92321	3.25289	0	8.30575	3.96075	3.06125	3.21971	1.03284	3.76359	22.0594	14
4721	HNRNPR	novel_in_catalog	combination_of_known_junctions	FALSE	11	14	25	28	0	0	0	0	0	7	1	0	4	4	0	3.09947	2.67532	4.59912	6.38878	0	0	0	0	0	3.46565	0.437321	0	1.37712	1.67271	0	7
4724	HNRNPR	novel_in_catalog	combination_of_known_junctions	FALSE	1	11	12	15	0	0	0	0	1	1	5	0	3	0	0	0.28177	2.10204	2.20758	3.42256	0	0	0	0	0.553717	0.495093	2.1866	0	1.03284	0	0	5
4725	HNRNPR	novel_in_catalog	combination_of_known_junctions	FALSE	8	9	13	0	0	0	0	0	0	0	0	2	2	2	0	2.25416	1.71985	2.39154	0	0	0	0	0	0	0	0	1.28788	0.688558	0.836354	0	4
4729	HNRNPR	incomplete-splice_match	5prime_fragment	FALSE	6	2	10	17	1	2	0	0	4	0	0	0	0	1	5	1.69062	0.382188	1.83965	3.8789	0.713818	1.96161	0	0	2.21487	0	0	0	0	0.418177	2.25096	6
4730	HNRNPR	incomplete-splice_match	5prime_fragment	FALSE	28	25	46	1	0	1	0	0	9	1	3	8	0	11	13	7.88955	4.77735	8.46239	0.228171	0	0.980804	0	0	4.98345	0.495093	1.31196	5.15153	0	4.59995	5.8525	8
4732	HNRNPR	novel_in_catalog	combination_of_known_junctions	FALSE	90	79	0	66	14	18	0	0	0	0	0	0	0	4	0	25.3593	15.0964	0	15.0593	9.99345	17.6545	0	0	0	0	0	0	0	1.67271	0	6
4735	HNRNPR	incomplete-splice_match	5prime_fragment	FALSE	5	2	4	1	0	0	0	1	1	0	0	0	5	4	4	1.40885	0.382188	0.73586	0.228171	0	0	0	2.13542	0.553717	0	0	0	1.7214	1.67271	1.80077	5
4737	HNRNPR	full-splice_match	alternative_3end	FALSE	2	10	8	0	2	2	1	1	0	0	0	3	2	0	0	0.563539	1.91094	1.47172	0	1.42764	1.96161	1.62645	2.13542	0	0	0	1.93182	0.688558	0	0	7
4739	HNRNPR	incomplete-splice_match	5prime_fragment	FALSE	4	10	17	3	2	6	1	1	5	1	5	5	5	4	6	1.12708	1.91094	3.1274	0.684512	1.42764	5.88482	1.62645	2.13542	2.76858	0.495093	2.1866	3.21971	1.7214	1.67271	2.70115	13
4744	ID3	full-splice_match	alternative_5end	FALSE	65	40	57	57	22	4	1	5	21	5	25	13	80	18	3	18.315	7.64376	10.486	13.0057	15.704	3.92321	1.62645	10.6771	11.628	2.47547	10.933	8.37123	27.5423	7.52719	1.35058	15
4760	B3GALNT2	incomplete-splice_match	5prime_fragment	FALSE	33	2	3	1	1	1	1	1	1	1	1	2	1	1	2	9.2984	0.382188	0.551895	0.228171	0.713818	0.980804	1.62645	2.13542	0.553717	0.495093	0.437321	1.28788	0.344279	0.418177	0.900384	4
4764	EIF3K	full-splice_match	reference_match	FALSE	13	6	11	1	2	0	1	0	1	3	1	10	6	5	0	3.66301	1.14656	2.02361	0.228171	1.42764	0	1.62645	0	0.553717	1.48528	0.437321	6.43941	2.06567	2.09089	0	9
4770	EIF3K	full-splice_match	alternative_5end	FALSE	353	289	557	211	22	19	13	17	65	95	100	54	64	113	74	99.4647	55.2262	102.468	48.144	15.704	18.6353	21.1438	36.3022	35.9916	47.0338	43.7321	34.7728	22.0339	47.254	33.3142	15
4773	EIF3K	full-splice_match	alternative_3end	FALSE	4	3	1	2	1	3	0	0	2	0	2	3	0	0	1	1.12708	0.573282	0.183965	0.456341	0.713818	2.94241	0	0	1.10743	0	0.874642	1.93182	0	0	0.450192	4
4775	EIF3K	incomplete-splice_match	5prime_fragment	FALSE	1	2	3	1	0	3	0	1	0	0	1	2	2	1	3	0.28177	0.382188	0.551895	0.228171	0	2.94241	0	2.13542	0	0	0.437321	1.28788	0.688558	0.418177	1.35058	4
4779	EIF3K	novel_in_catalog	combination_of_known_junctions	FALSE	15	12	26	2	2	0	0	0	2	1	2	0	2	4	0	4.22655	2.29313	4.78309	0.456341	1.42764	0	0	0	1.10743	0.495093	0.874642	0	0.688558	1.67271	0	6
4784	EIF3K	incomplete-splice_match	3prime_fragment	FALSE	2	0	10	8	7	13	10	16	8	10	21	12	6	3	34	0.563539	0	1.83965	1.82536	4.99672	12.7504	16.2645	34.1668	4.42973	4.95093	9.18374	7.72729	2.06567	1.25453	15.3065	13
4786	ACTN4	incomplete-splice_match	5prime_fragment	FALSE	18	8	14	9	1	0	0	0	5	1	6	0	5	7	0	5.07185	1.52875	2.57551	2.05354	0.713818	0	0	0	2.76858	0.495093	2.62392	0	1.7214	2.92724	0	8
4797	ECH1	full-splice_match	alternative_5end	FALSE	169	258	270	203	36	30	28	0	102	102	106	10	154	99	34	47.6191	49.3023	49.6705	46.3186	25.6974	29.4241	45.5405	0	56.4791	50.4995	46.356	6.43941	53.019	41.3995	15.3065	14
4802	HNRNPL	incomplete-splice_match	5prime_fragment	FALSE	9	10	4	8	3	2	1	0	2	1	5	4	5	2	1	2.53593	1.91094	0.73586	1.82536	2.14145	1.96161	1.62645	0	1.10743	0.495093	2.1866	2.57576	1.7214	0.836354	0.450192	10
4805	HNRNPL	full-splice_match	alternative_5end	FALSE	34	0	0	314	62	1	30	0	79	95	0	0	12	0	0	9.58017	0	0	71.6456	44.2567	0.980804	48.7934	0	43.7436	47.0338	0	0	4.13135	0	0	7
4809	RINL	incomplete-splice_match	3prime_fragment	FALSE	1	0	5	0	2	0	0	1	1	0	1	2	2	0	3	0.28177	0	0.919825	0	1.42764	0	0	2.13542	0.553717	0	0.437321	1.28788	0.688558	0	1.35058	4
4812	SIRT2	full-splice_match	alternative_5end	FALSE	493	1088	599	33	5	120	0	64	549	10	277	397	469	733	369	138.912	207.91	110.195	7.52963	3.56909	117.696	0	136.667	303.99	4.95093	121.138	255.645	161.467	306.524	166.121	14
4814	SIRT2	incomplete-splice_match	intron_retention	FALSE	2	6	0	3	2	2	0	0	2	1	2	0	1	2	0	0.563539	1.14656	0	0.684512	1.42764	1.96161	0	0	1.10743	0.495093	0.874642	0	0.344279	0.836354	0	4
4828	NFKBIB	full-splice_match	reference_match	FALSE	11	26	28	32	0	0	0	0	10	6	0	0	14	19	16	3.09947	4.96845	5.15102	7.30146	0	0	0	0	5.53717	2.97056	0	0	4.81991	7.94537	7.20307	9
4829	CCER2	full-splice_match	reference_match	FALSE	4	1	1	11	0	0	0	0	3	3	0	0	0	0	11	1.12708	0.191094	0.183965	2.50988	0	0	0	0	1.66115	1.48528	0	0	0	0	4.95211	5
4832	SARS2	incomplete-splice_match	3prime_fragment	FALSE	11	0	0	0	0	0	0	0	15	28	1	32	0	0	0	3.09947	0	0	0	0	0	0	0	8.30575	13.8626	0.437321	20.6061	0	0	0	4
4833	SARS2	incomplete-splice_match	5prime_fragment	FALSE	3	0	1	0	1	0	2	0	1	0	5	3	1	4	2	0.845309	0	0.183965	0	0.713818	0	3.25289	0	0.553717	0	2.1866	1.93182	0.344279	1.67271	0.900384	4
4838	MRPS12	full-splice_match	alternative_5end	FALSE	63	113	133	66	12	11	4	0	36	24	19	27	72	39	29	17.7515	21.5936	24.4673	15.0593	8.56581	10.7888	6.50579	0	19.9338	11.8822	8.30909	17.3864	24.7881	16.3089	13.0556	14
4840	MRPS12	full-splice_match	alternative_3end	FALSE	1	5	4	9	2	0	0	0	0	0	8	0	0	12	1	0.28177	0.95547	0.73586	2.05354	1.42764	0	0	0	0	0	3.49857	0	0	5.01813	0.450192	4
4847	OLA1P1	full-splice_match	mono-exon	FALSE	1	3	9	4	1	0	0	0	4	1	5	2	2	3	1	0.28177	0.573282	1.65568	0.912682	0.713818	0	0	0	2.21487	0.495093	2.1866	1.28788	0.688558	1.25453	0.450192	5
4859	INO80D-AS1	full-splice_match	alternative_3end5end	FALSE	36	37	27	0	1	0	0	0	17	0	0	12	24	1	0	10.1437	7.07048	4.96705	0	0.713818	0	0	0	9.41318	0	0	7.72729	8.2627	0.418177	0	6
4862	EEF1B2	full-splice_match	reference_match	FALSE	112	233	208	2	0	10	0	0	7	0	1	2	0	3	0	31.5582	44.5249	38.2647	0.456341	0	9.80804	0	0	3.87602	0	0.437321	1.28788	0	1.25453	0	7
4864	EEF1B2	full-splice_match	reference_match	FALSE	41	30	20	180	0	0	0	0	1	0	0	36	0	1	72	11.5526	5.73282	3.6793	41.0707	0	0	0	0	0.553717	0	0	23.1819	0	0.418177	32.4138	6
4865	EEF1B2	full-splice_match	alternative_5end	FALSE	373	382	506	47	25	10	24	19	132	126	145	52	126	107	56	105.1	72.9979	93.0862	10.724	17.8454	9.80804	39.0347	40.5731	73.0906	62.3817	63.4115	33.4849	43.3792	44.745	25.2108	15
4870	EEF1B2	full-splice_match	alternative_3end	FALSE	30	18	17	6	3	2	0	2	6	4	14	5	9	13	6	8.45309	3.43969	3.1274	1.36902	2.14145	1.96161	0	4.27085	3.3223	1.98037	6.12249	3.21971	3.09851	5.4363	2.70115	14
4871	EEF1B2	incomplete-splice_match	5prime_fragment	FALSE	17	19	30	7	1	3	0	3	7	5	15	4	9	9	8	4.79008	3.63079	5.51895	1.59719	0.713818	2.94241	0	6.40627	3.87602	2.47547	6.55981	2.57576	3.09851	3.76359	3.60154	13
4872	EEF1B2	incomplete-splice_match	internal_fragment	FALSE	4	2	4	1	0	0	0	0	2	0	0	3	1	3	5	1.12708	0.382188	0.73586	0.228171	0	0	0	0	1.10743	0	0	1.93182	0.344279	1.25453	2.25096	5
4878	EEF1B2	full-splice_match	reference_match	FALSE	2	3	1	7	1	0	2	1	1	1	2	1	2	3	5	0.563539	0.573282	0.183965	1.59719	0.713818	0	3.25289	2.13542	0.553717	0.495093	0.874642	0.643941	0.688558	1.25453	2.25096	5
4879	ZDBF2	incomplete-splice_match	5prime_fragment	FALSE	1	1	1	0	2	2	0	2	1	6	2	5	0	6	6	0.28177	0.191094	0.183965	0	1.42764	1.96161	0	4.27085	0.553717	2.97056	0.874642	3.21971	0	2.50906	2.70115	7
4903	NDUFS1	incomplete-splice_match	3prime_fragment	FALSE	34	0	0	11	8	0	9	1	36	8	7	1	18	62	0	9.58017	0	0	2.50988	5.71054	0	14.638	2.13542	19.9338	3.96075	3.06125	0.643941	6.19702	25.927	0	10
4904	NDUFS1	incomplete-splice_match	3prime_fragment	FALSE	2	2	0	99	0	0	14	0	2	3	0	0	0	0	19	0.563539	0.382188	0	22.5889	0	0	22.7703	0	1.10743	1.48528	0	0	0	0	8.55365	5
4906	NDUFS1	incomplete-splice_match	3prime_fragment	FALSE	1	68	3	27	2	3	0	1	0	0	0	23	0	2	69	0.28177	12.9944	0.551895	6.16061	1.42764	2.94241	0	2.13542	0	0	0	14.8106	0	0.836354	31.0633	7
4907	NDUFS1	incomplete-splice_match	3prime_fragment	FALSE	3	2	0	63	2	0	0	0	0	36	0	0	0	0	23	0.845309	0.382188	0	14.3747	1.42764	0	0	0	0	17.8234	0	0	0	0	10.3544	4
4912	FRG1	incomplete-splice_match	5prime_fragment	FALSE	7	13	16	2	0	1	1	0	4	4	0	1	0	0	0	1.97239	2.48422	2.94344	0.456341	0	0.980804	1.62645	0	2.21487	1.98037	0	0.643941	0	0	0	6
4913	FRG1	full-splice_match	reference_match	FALSE	27	34	47	38	2	2	0	0	7	5	0	9	0	11	6	7.60778	6.4972	8.64635	8.67048	1.42764	1.96161	0	0	3.87602	2.47547	0	5.79547	0	4.59995	2.70115	11
4914	FRG1	incomplete-splice_match	5prime_fragment	FALSE	15	15	20	0	0	0	0	0	7	0	0	0	0	3	2	4.22655	2.86641	3.6793	0	0	0	0	0	3.87602	0	0	0	0	1.25453	0.900384	5
4918	FRG1	full-splice_match	reference_match	FALSE	16	61	34	24	3	0	0	0	14	8	7	0	12	17	3	4.50831	11.6567	6.25481	5.47609	2.14145	0	0	0	7.75203	3.96075	3.06125	0	4.13135	7.10901	1.35058	11
4939	ENSG00000284072	full-splice_match	mono-exon	FALSE	4	2	4	10	1	0	0	0	3	5	4	2	1	3	2	1.12708	0.382188	0.73586	2.28171	0.713818	0	0	0	1.66115	2.47547	1.74928	1.28788	0.344279	1.25453	0.900384	7
4945	CANX	incomplete-splice_match	5prime_fragment	FALSE	16	39	39	1	0	2	0	0	0	0	1	5	2	1	0	4.50831	7.45267	7.17463	0.228171	0	1.96161	0	0	0	0	0.437321	3.21971	0.688558	0.418177	0	5
4948	CANX	incomplete-splice_match	5prime_fragment	FALSE	1	0	99	58	0	0	3	2	10	14	16	0	0	11	12	0.28177	0	18.2125	13.2339	0	0	4.87934	4.27085	5.53717	6.9313	6.99713	0	0	4.59995	5.40231	9
4953	CANX	incomplete-splice_match	3prime_fragment	FALSE	3	4	73	56	0	5	0	0	0	0	0	0	0	40	9	0.845309	0.764376	13.4294	12.7776	0	4.90402	0	0	0	0	0	0	0	16.7271	4.05173	5
4957	CANX	incomplete-splice_match	3prime_fragment	FALSE	3	18	6	0	0	0	0	0	0	0	1	14	1	331	0	0.845309	3.43969	1.10379	0	0	0	0	0	0	0	0.437321	9.01518	0.344279	138.417	0	4
4962	PRDX2P3	full-splice_match	mono-exon	FALSE	2	0	1	2	2	0	0	0	3	3	2	2	0	1	1	0.563539	0	0.183965	0.456341	1.42764	0	0	0	1.66115	1.48528	0.874642	1.28788	0	0.418177	0.450192	4
4976	HNRNPH1	full-splice_match	alternative_3end	FALSE	11	6	5	0	0	0	1	0	0	0	0	8	11	5	1	3.09947	1.14656	0.919825	0	0	0	1.62645	0	0	0	0	5.15153	3.78707	2.09089	0.450192	6
4979	HNRNPH1	incomplete-splice_match	3prime_fragment	FALSE	10	5	0	7	0	0	0	2	3	10	0	1	4	11	5	2.8177	0.95547	0	1.59719	0	0	0	4.27085	1.66115	4.95093	0	0.643941	1.37712	4.59995	2.25096	8
4982	LTC4S	full-splice_match	alternative_3end	FALSE	34	2	7	1	0	2	4	0	2	0	9	3	5	0	1	9.58017	0.382188	1.28775	0.228171	0	1.96161	6.50579	0	1.10743	0	3.93589	1.93182	1.7214	0	0.450192	8
4994	SQSTM1	novel_not_in_catalog	novel_exon	FALSE	9	1	3	0	4	0	0	0	2	0	2	2	2	2	0	2.53593	0.191094	0.551895	0	2.85527	0	0	0	1.10743	0	0.874642	1.28788	0.688558	0.836354	0	4
4998	SQSTM1	incomplete-splice_match	5prime_fragment	FALSE	273	302	277	124	72	44	28	12	64	56	93	97	91	146	44	76.9231	57.7104	50.9583	28.2932	51.3949	43.1554	45.5405	25.6251	35.4379	27.7252	40.6708	62.4623	31.3294	61.0539	19.8085	15
4999	SQSTM1	full-splice_match	alternative_3end	FALSE	123	696	20	26	182	0	0	0	5	0	0	0	2	7	315	34.6577	133.001	3.6793	5.93244	129.915	0	0	0	2.76858	0	0	0	0.688558	2.92724	141.811	8
5002	SQSTM1	incomplete-splice_match	5prime_fragment	FALSE	2	7	15	0	0	5	0	0	2	0	1	0	0	0	0	0.563539	1.33766	2.75947	0	0	4.90402	0	0	1.10743	0	0.437321	0	0	0	0	4
5009	SQSTM1	incomplete-splice_match	3prime_fragment	FALSE	1	1	1	0	0	0	0	0	0	1	0	96	3	3	3	0.28177	0.191094	0.183965	0	0	0	0	0	0	0.495093	0	61.8183	1.03284	1.25453	1.35058	4
5010	SQSTM1	incomplete-splice_match	3prime_fragment	FALSE	1	1	0	1	0	0	84	0	2	0	1	4	4	4	0	0.28177	0.191094	0	0.228171	0	0	136.622	0	1.10743	0	0.437321	2.57576	1.37712	1.67271	0	5
5015	SQSTM1	novel_not_in_catalog	novel_exon	FALSE	15	7	5	3	0	1	1	0	1	1	3	3	5	3	1	4.22655	1.33766	0.919825	0.684512	0	0.980804	1.62645	0	0.553717	0.495093	1.31196	1.93182	1.7214	1.25453	0.450192	7
5017	MRNIP-DT	full-splice_match	alternative_5end	FALSE	5	7	11	0	0	1	0	0	5	0	1	4	0	2	6	1.40885	1.33766	2.02361	0	0	0.980804	0	0	2.76858	0	0.437321	2.57576	0	0.836354	2.70115	6
5021	MRNIP	incomplete-splice_match	5prime_fragment	FALSE	4	4	6	2	3	5	3	2	3	4	4	5	5	4	4	1.12708	0.764376	1.10379	0.456341	2.14145	4.90402	4.87934	4.27085	1.66115	1.98037	1.74928	3.21971	1.7214	1.67271	1.80077	13
5022	MRNIP	full-splice_match	reference_match	FALSE	13	8	18	1	1	2	0	0	39	7	2	40	0	41	1	3.66301	1.52875	3.31137	0.228171	0.713818	1.96161	0	0	21.5949	3.46565	0.874642	25.7576	0	17.1453	0.450192	8
5024	MRNIP	full-splice_match	alternative_5end	FALSE	8	3	9	59	1	0	0	0	3	1	0	0	2	2	1	2.25416	0.573282	1.65568	13.4621	0.713818	0	0	0	1.66115	0.495093	0	0	0.688558	0.836354	0.450192	4
5034	TMEM256	novel_in_catalog	combination_of_known_junctions,intron_retention	FALSE	1	6	7	5	6	2	5	4	8	0	0	3	4	0	0	0.28177	1.14656	1.28775	1.14085	4.28291	1.96161	8.13224	8.5417	4.42973	0	0	1.93182	1.37712	0	0	10
5040	TMEM256	full-splice_match	reference_match	FALSE	230	302	325	132	5	9	3	7	81	37	34	48	49	66	31	64.807	57.7104	59.7886	30.1185	3.56909	8.82723	4.87934	14.948	44.851	18.3184	14.8689	30.9092	16.8697	27.5997	13.956	15
5041	TMEM256	novel_in_catalog	combination_of_known_junctions	FALSE	15	9	19	4	0	3	0	0	0	0	2	3	2	3	3	4.22655	1.71985	3.49533	0.912682	0	2.94241	0	0	0	0	0.874642	1.93182	0.688558	1.25453	1.35058	7
5042	TMEM256	novel_not_in_catalog	novel_exon	FALSE	11	1	9	0	1	0	1	0	2	1	1	0	1	1	0	3.09947	0.191094	1.65568	0	0.713818	0	1.62645	0	1.10743	0.495093	0.437321	0	0.344279	0.418177	0	4
5043	TMEM256	novel_not_in_catalog	partial_intron_retention	FALSE	12	13	20	3	0	0	0	0	2	2	0	2	0	5	3	3.38124	2.48422	3.6793	0.684512	0	0	0	0	1.10743	0.990186	0	1.28788	0	2.09089	1.35058	7
5046	CHRNB1	full-splice_match	alternative_3end	FALSE	23	14	22	34	3	1	3	0	14	6	7	7	36	0	15	6.4807	2.67532	4.04723	7.7578	2.14145	0.980804	4.87934	0	7.75203	2.97056	3.06125	4.50759	12.394	0	6.75288	12
5048	POLR2A	incomplete-splice_match	5prime_fragment	FALSE	4	3	5	4	4	0	2	0	1	3	3	6	6	3	2	1.12708	0.573282	0.919825	0.912682	2.85527	0	3.25289	0	0.553717	1.48528	1.31196	3.86365	2.06567	1.25453	0.900384	8
5057	PLCL2	incomplete-splice_match	3prime_fragment	FALSE	21	0	0	0	0	2	0	0	0	0	4	0	0	49	0	5.91716	0	0	0	0	1.96161	0	0	0	0	1.74928	0	0	20.4907	0	4
5067	CASP8AP2	incomplete-splice_match	internal_fragment	FALSE	1	16	4	0	1	0	1	0	0	3	4	3	8	0	4	0.28177	3.05751	0.73586	0	0.713818	0	1.62645	0	0	1.48528	1.74928	1.93182	2.75423	0	1.80077	7
5069	CASP8AP2	incomplete-splice_match	3prime_fragment	FALSE	16	4	21	55	1	1	7	0	23	5	18	0	2	25	1	4.50831	0.764376	3.86326	12.5494	0.713818	0.980804	11.3851	0	12.7355	2.47547	7.87177	0	0.688558	10.4544	0.450192	8
5070	C17orf97	full-splice_match	alternative_3end5end	FALSE	5	0	4	0	6	5	3	0	3	3	2	1	2	0	0	1.40885	0	0.73586	0	4.28291	4.90402	4.87934	0	1.66115	1.48528	0.874642	0.643941	0.688558	0	0	6
5072	C17orf97	novel_in_catalog	combination_of_known_splicesites	FALSE	6	4	1	0	37	15	0	0	6	0	17	0	0	0	0	1.69062	0.764376	0.183965	0	26.4113	14.7121	0	0	3.3223	0	7.43445	0	0	0	0	5
5083	VPS53	full-splice_match	mono-exon	FALSE	1	4	5	7	3	5	0	2	1	8	5	6	8	4	7	0.28177	0.764376	0.919825	1.59719	2.14145	4.90402	0	4.27085	0.553717	3.96075	2.1866	3.86365	2.75423	1.67271	3.15134	10
5085	VPS53	incomplete-splice_match	5prime_fragment	FALSE	5	4	6	3	1	1	0	3	1	1	4	5	8	7	0	1.40885	0.764376	1.10379	0.684512	0.713818	0.980804	0	6.40627	0.553717	0.495093	1.74928	3.21971	2.75423	2.92724	0	7
5094	ENSG00000284449	full-splice_match	mono-exon	FALSE	3	4	1	1	1	2	0	1	5	3	8	1	1	1	2	0.845309	0.764376	0.183965	0.228171	0.713818	1.96161	0	2.13542	2.76858	1.48528	3.49857	0.643941	0.344279	0.418177	0.900384	5
5098	TOP3A	full-splice_match	alternative_5end	FALSE	16	29	37	15	5	10	6	7	14	12	15	19	14	12	24	4.50831	5.54173	6.8067	3.42256	3.56909	9.80804	9.75868	14.948	7.75203	5.94112	6.55981	12.2349	4.81991	5.01813	10.8046	15
5103	ENSG00000290637	full-splice_match	alternative_3end5end	FALSE	9	0	0	0	24	0	0	35	0	25	35	0	0	0	0	2.53593	0	0	0	17.1316	0	0	74.7399	0	12.3773	15.3062	0	0	0	0	5
5104	ENSG00000284319	full-splice_match	mono-exon	FALSE	8	2	5	6	0	0	1	1	3	0	0	2	2	0	1	2.25416	0.382188	0.919825	1.36902	0	0	1.62645	2.13542	1.66115	0	0	1.28788	0.688558	0	0.450192	6
5106	SLC25A24	incomplete-splice_match	5prime_fragment	FALSE	12	12	6	1	2	4	3	1	0	2	4	5	4	3	3	3.38124	2.29313	1.10379	0.228171	1.42764	3.92321	4.87934	2.13542	0	0.990186	1.74928	3.21971	1.37712	1.25453	1.35058	12
5107	SLC25A24	full-splice_match	mono-exon	FALSE	3	4	5	1	2	0	0	2	4	1	1	2	2	0	4	0.845309	0.764376	0.919825	0.228171	1.42764	0	0	4.27085	2.21487	0.495093	0.437321	1.28788	0.688558	0	1.80077	5
5115	HBP1	incomplete-splice_match	5prime_fragment	FALSE	1	6	10	4	0	1	0	0	8	3	1	1	0	8	0	0.28177	1.14656	1.83965	0.912682	0	0.980804	0	0	4.42973	1.48528	0.437321	0.643941	0	3.34542	0	5
5117	HBP1	incomplete-splice_match	5prime_fragment	FALSE	3	18	8	16	7	7	2	0	15	0	0	3	9	4	5	0.845309	3.43969	1.47172	3.65073	4.99672	6.86563	3.25289	0	8.30575	0	0	1.93182	3.09851	1.67271	2.25096	11
5121	HBP1	incomplete-splice_match	5prime_fragment	FALSE	2	9	7	2	1	5	0	1	0	0	8	1	2	1	1	0.563539	1.71985	1.28775	0.456341	0.713818	4.90402	0	2.13542	0	0	3.49857	0.643941	0.688558	0.418177	0.450192	5
5122	GPR22	full-splice_match	alternative_3end5end	FALSE	43	9	63	17	10	7	7	7	12	25	29	2	41	15	98	12.1161	1.71985	11.5898	3.8789	7.13818	6.86563	11.3851	14.948	6.6446	12.3773	12.6823	1.28788	14.1154	6.27266	44.1188	15
5124	GPR22	full-splice_match	reference_match	FALSE	15	11	16	13	0	7	0	0	7	12	2	0	14	1	14	4.22655	2.10204	2.94344	2.96622	0	6.86563	0	0	3.87602	5.94112	0.874642	0	4.81991	0.418177	6.30269	9
5131	COG5	incomplete-splice_match	5prime_fragment	FALSE	6	10	13	10	3	5	1	2	3	4	10	5	7	4	14	1.69062	1.91094	2.39154	2.28171	2.14145	4.90402	1.62645	4.27085	1.66115	1.98037	4.37321	3.21971	2.40995	1.67271	6.30269	15
5132	COG5	incomplete-splice_match	5prime_fragment	FALSE	6	5	2	7	2	1	4	1	1	1	6	3	3	4	4	1.69062	0.95547	0.36793	1.59719	1.42764	0.980804	6.50579	2.13542	0.553717	0.495093	2.62392	1.93182	1.03284	1.67271	1.80077	10
5133	COG5	incomplete-splice_match	5prime_fragment	FALSE	1	7	2	3	6	2	1	1	3	1	5	1	6	7	7	0.28177	1.33766	0.36793	0.684512	4.28291	1.96161	1.62645	2.13542	1.66115	0.495093	2.1866	0.643941	2.06567	2.92724	3.15134	10
5141	DUS4L	full-splice_match	reference_match	FALSE	4	5	7	3	1	2	2	0	1	2	5	0	0	3	3	1.12708	0.95547	1.28775	0.684512	0.713818	1.96161	3.25289	0	0.553717	0.990186	2.1866	0	0	1.25453	1.35058	7
5143	DUS4L	incomplete-splice_match	5prime_fragment	FALSE	12	7	14	8	1	3	4	5	2	3	1	6	4	6	7	3.38124	1.33766	2.57551	1.82536	0.713818	2.94241	6.50579	10.6771	1.10743	1.48528	0.437321	3.86365	1.37712	2.50906	3.15134	13
5148	BCAP29	novel_not_in_catalog	novel_exon	FALSE	6	0	5	1	2	1	1	1	4	3	2	1	2	3	1	1.69062	0	0.919825	0.228171	1.42764	0.980804	1.62645	2.13542	2.21487	1.48528	0.874642	0.643941	0.688558	1.25453	0.450192	7
5149	BCAP29	novel_not_in_catalog	novel_exon	FALSE	88	100	99	62	6	6	2	0	14	81	63	16	3	42	68	24.7957	19.1094	18.2125	14.1466	4.28291	5.88482	3.25289	0	7.75203	40.1025	27.5512	10.3031	1.03284	17.5634	30.6131	14
5151	BCAP29	novel_not_in_catalog	novel_exon	FALSE	3	0	5	1	0	2	3	1	1	1	3	6	6	4	3	0.845309	0	0.919825	0.228171	0	1.96161	4.87934	2.13542	0.553717	0.495093	1.31196	3.86365	2.06567	1.67271	1.35058	8
5152	BCAP29	novel_not_in_catalog	novel_exon	FALSE	163	0	214	0	0	0	0	5	2	3	0	27	0	41	1	45.9285	0	39.3685	0	0	0	0	10.6771	1.10743	1.48528	0	17.3864	0	17.1453	0.450192	7
5154	BCAP29	novel_not_in_catalog	novel_exon	FALSE	49	24	29	1	6	4	8	6	8	34	17	4	0	9	12	13.8067	4.58626	5.33498	0.228171	4.28291	3.92321	13.0116	12.8125	4.42973	16.8332	7.43445	2.57576	0	3.76359	5.40231	13
5155	BCAP29	novel_not_in_catalog	novel_exon	FALSE	5	16	17	25	12	0	0	0	0	0	18	0	0	11	0	1.40885	3.05751	3.1274	5.70426	8.56581	0	0	0	0	0	7.87177	0	0	4.59995	0	7
5157	BCAP29	novel_not_in_catalog	novel_exon	FALSE	9	2	2	2	0	0	0	0	2	0	2	3	3	1	0	2.53593	0.382188	0.36793	0.456341	0	0	0	0	1.10743	0	0.874642	1.93182	1.03284	0.418177	0	4
5162	ENSG00000284582	full-splice_match	mono-exon	FALSE	3	8	10	2	10	8	3	2	6	7	14	9	4	14	5	0.845309	1.52875	1.83965	0.456341	7.13818	7.84643	4.87934	4.27085	3.3223	3.46565	6.12249	5.79547	1.37712	5.85448	2.25096	13
5231	POLR3E	incomplete-splice_match	3prime_fragment	FALSE	13	3	24	71	1	26	0	8	10	3	9	0	32	12	35	3.66301	0.573282	4.41516	16.2001	0.713818	25.5009	0	17.0834	5.53717	1.48528	3.93589	0	11.0169	5.01813	15.7567	11
5241	MOSMO	novel_not_in_catalog	partial_intron_retention	FALSE	34	69	38	105	0	9	0	0	34	49	68	47	100	66	0	9.58017	13.1855	6.99067	23.9579	0	8.82723	0	0	18.8264	24.2596	29.7378	30.2652	34.4279	27.5997	0	11
5242	MOSMO	novel_not_in_catalog	partial_intron_retention	FALSE	2	8	7	5	1	0	1	0	6	2	2	2	3	0	1	0.563539	1.52875	1.28775	1.14085	0.713818	0	1.62645	0	3.3223	0.990186	0.874642	1.28788	1.03284	0	0.450192	7
5243	ENSG00000284493	novel_not_in_catalog	novel_exon	FALSE	127	238	263	113	28	27	0	2	10	0	53	3	102	54	15	35.7847	45.4804	48.3828	25.7833	19.9869	26.4817	0	4.27085	5.53717	0	23.178	1.93182	35.1165	22.5816	6.75288	13
5249	ENSG00000284493	novel_not_in_catalog	novel_exon	FALSE	7	10	10	7	0	0	2	2	0	3	8	1	3	0	9	1.97239	1.91094	1.83965	1.59719	0	0	3.25289	4.27085	0	1.48528	3.49857	0.643941	1.03284	0	4.05173	10
5256	ENSG00000284493	novel_not_in_catalog	novel_exon	FALSE	12	7	14	3	2	2	0	1	4	3	2	2	4	3	9	3.38124	1.33766	2.57551	0.684512	1.42764	1.96161	0	2.13542	2.21487	1.48528	0.874642	1.28788	1.37712	1.25453	4.05173	12
5264	ENSG00000284559	incomplete-splice_match	3prime_fragment	FALSE	3	0	5	0	0	3	0	3	0	0	7	0	0	3	6	0.845309	0	0.919825	0	0	2.94241	0	6.40627	0	0	3.06125	0	0	1.25453	2.70115	5
5266	METTL9	novel_not_in_catalog	Alt3	FALSE	36	24	2	184	0	0	0	0	61	0	1	0	0	0	4	10.1437	4.58626	0.36793	41.9834	0	0	0	0	33.7767	0	0.437321	0	0	0	1.80077	5
5270	METTL9	incomplete-splice_match	intron_retention	FALSE	1	1	21	2	30	0	0	0	0	77	1	45	0	10	2	0.28177	0.191094	3.86326	0.456341	21.4145	0	0	0	0	38.1222	0.437321	28.9774	0	4.18177	0.900384	5
5275	METTL9	incomplete-splice_match	intron_retention	FALSE	4	0	3	1	4	0	1	1	2	1	2	8	3	3	0	1.12708	0	0.551895	0.228171	2.85527	0	1.62645	2.13542	1.10743	0.495093	0.874642	5.15153	1.03284	1.25453	0	8
5317	novelGene_ENSG00000283826_AS	antisense	multi-exon	FALSE	6	4	5	0	1	0	0	0	7	2	5	5	5	7	13	1.69062	0.764376	0.919825	0	0.713818	0	0	0	3.87602	0.990186	2.1866	3.21971	1.7214	2.92724	5.8525	7
5330	ATP5IF1	full-splice_match	reference_match	FALSE	1779	763	1527	232	195	158	191	131	334	492	664	533	535	469	268	501.268	145.805	280.914	52.9356	139.194	154.967	310.651	279.741	184.941	243.586	290.381	343.221	184.189	196.125	120.651	15
5332	ATP5IF1	full-splice_match	alternative_3end	FALSE	35	69	45	30	24	16	2	16	15	34	7	21	4	30	49	9.86194	13.1855	8.27842	6.84512	17.1316	15.6929	3.25289	34.1668	8.30575	16.8332	3.06125	13.5228	1.37712	12.5453	22.0594	15
5352	H2AC25	full-splice_match	mono-exon	FALSE	66	139	107	88	95	32	33	9	11	47	79	65	127	96	61	18.5968	26.5621	19.6842	20.079	67.8127	31.3857	53.6728	19.2188	6.09088	23.2694	34.5483	41.8562	43.7234	40.145	27.4617	15
5353	H2BC26	full-splice_match	mono-exon	FALSE	6	1	4	4	7	4	4	0	5	4	16	4	5	8	18	1.69062	0.191094	0.73586	0.912682	4.99672	3.92321	6.50579	0	2.76858	1.98037	6.99713	2.57576	1.7214	3.34542	8.10346	11
5354	RNF187	incomplete-splice_match	5prime_fragment	FALSE	3	1	2	2	3	2	2	1	3	5	3	9	4	3	4	0.845309	0.191094	0.36793	0.456341	2.14145	1.96161	3.25289	2.13542	1.66115	2.47547	1.31196	5.79547	1.37712	1.25453	1.80077	11
5355	RNF187	incomplete-splice_match	5prime_fragment	FALSE	3	4	3	1	3	1	2	0	1	1	2	1	9	4	3	0.845309	0.764376	0.551895	0.228171	2.14145	0.980804	3.25289	0	0.553717	0.495093	0.874642	0.643941	3.09851	1.67271	1.35058	5
5356	RNF187	full-splice_match	alternative_3end5end	FALSE	35	385	6	12	33	70	103	0	298	153	566	304	65	16	2	9.86194	73.5712	1.10379	2.73805	23.556	68.6563	167.524	0	165.008	75.7492	247.524	195.758	22.3781	6.69083	0.900384	13
5362	RHOU	novel_in_catalog	combination_of_known_splicesites	FALSE	28	125	28	2	0	0	0	0	6	0	0	2	0	2	0	7.88955	23.8868	5.15102	0.456341	0	0	0	0	3.3223	0	0	1.28788	0	0.836354	0	5
5363	RHOU	full-splice_match	alternative_3end	FALSE	82	127	150	121	8	14	0	3	53	15	7	5	15	26	14	23.1051	24.269	27.5947	27.6086	5.71054	13.7313	0	6.40627	29.347	7.4264	3.06125	3.21971	5.16419	10.8726	6.30269	14
5365	CRYGD	full-splice_match	alternative_5end	FALSE	6	8	7	3	0	0	0	0	1	0	0	3	3	2	0	1.69062	1.52875	1.28775	0.684512	0	0	0	0	0.553717	0	0	1.93182	1.03284	0.836354	0	5
5374	PAK1IP1	incomplete-splice_match	5prime_fragment	FALSE	16	18	25	0	6	7	3	4	4	2	7	4	9	9	8	4.50831	3.43969	4.59912	0	4.28291	6.86563	4.87934	8.5417	2.21487	0.990186	3.06125	2.57576	3.09851	3.76359	3.60154	13
5375	PAK1IP1	incomplete-splice_match	5prime_fragment	FALSE	6	6	8	1	0	1	0	0	1	0	1	0	0	4	0	1.69062	1.14656	1.47172	0.228171	0	0.980804	0	0	0.553717	0	0.437321	0	0	1.67271	0	4
5380	TMEM14C	full-splice_match	alternative_3end5end	FALSE	197	305	389	266	22	6	4	9	89	63	85	61	113	16	83	55.5086	58.2837	71.5624	60.6934	15.704	5.88482	6.50579	19.2188	49.2808	31.1909	37.1723	39.2804	38.9035	6.69083	37.3659	15
5382	TMEM14C	incomplete-splice_match	5prime_fragment	FALSE	5	3	4	0	0	0	0	1	0	2	0	3	0	2	4	1.40885	0.573282	0.73586	0	0	0	0	2.13542	0	0.990186	0	1.93182	0	0.836354	1.80077	4
5383	TMEM14C	novel_in_catalog	combination_of_known_splicesites	FALSE	45	9	5	2	0	0	0	0	2	4	0	0	0	22	1	12.6796	1.71985	0.919825	0.456341	0	0	0	0	1.10743	1.98037	0	0	0	9.1999	0.450192	5
5399	novelGene_ENSG00000285277_AS	antisense	multi-exon	FALSE	2	0	0	0	4	3	0	0	0	0	0	3	0	3	0	0.563539	0	0	0	2.85527	2.94241	0	0	0	0	0	1.93182	0	1.25453	0	4
5427	FBXL6	full-splice_match	alternative_5end	FALSE	1	0	0	0	2	2	0	19	0	1	68	0	0	16	1	0.28177	0	0	0	1.42764	1.96161	0	40.5731	0	0.495093	29.7378	0	0	6.69083	0.450192	5
5428	SLC52A2	full-splice_match	reference_match	FALSE	35	4	0	0	14	0	0	0	0	0	0	0	71	5	0	9.86194	0.764376	0	0	9.99345	0	0	0	0	0	0	0	24.4438	2.09089	0	4
5432	CPSF1	incomplete-splice_match	3prime_fragment	FALSE	25	2	1	3	102	4	28	0	0	0	2	1	0	0	0	7.04424	0.382188	0.183965	0.684512	72.8094	3.92321	45.5405	0	0	0	0.874642	0.643941	0	0	0	4
5436	ENSG00000284888	full-splice_match	mono-exon	FALSE	6	7	5	2	1	3	0	0	1	4	3	3	4	0	1	1.69062	1.33766	0.919825	0.456341	0.713818	2.94241	0	0	0.553717	1.98037	1.31196	1.93182	1.37712	0	0.450192	7
5437	SLC39A4	full-splice_match	reference_match	FALSE	6	13	4	2	0	0	0	0	0	0	10	6	2	1	0	1.69062	2.48422	0.73586	0.456341	0	0	0	0	0	0	4.37321	3.86365	0.688558	0.418177	0	4
5438	SLC39A4	incomplete-splice_match	3prime_fragment	FALSE	3	0	6	0	0	0	0	0	2	9	0	0	0	9	0	0.845309	0	1.10379	0	0	0	0	0	1.10743	4.45584	0	0	0	3.76359	0	4
5440	VPS28	full-splice_match	alternative_5end	FALSE	554	483	526	455	28	16	22	6	94	313	57	94	430	109	39	156.1	92.2984	96.7655	103.818	19.9869	15.6929	35.7818	12.8125	52.0494	154.964	24.9273	60.5305	148.04	45.5813	17.5575	15
5444	VPS28	full-splice_match	alternative_3end	FALSE	32	38	61	20	8	5	1	66	169	12	8	6	12	124	5	9.01663	7.26158	11.2219	4.56341	5.71054	4.90402	1.62645	140.938	93.5781	5.94112	3.49857	3.86365	4.13135	51.854	2.25096	15
5447	VPS28	novel_in_catalog	combination_of_known_junctions,intron_retention	FALSE	4	5	1	0	8	0	1	10	0	0	0	0	0	0	0	1.12708	0.95547	0.183965	0	5.71054	0	1.62645	21.3542	0	0	0	0	0	0	0	4
5448	VPS28	novel_not_in_catalog	Alt3	FALSE	6	8	11	0	0	0	64	0	3	1	1	0	1	0	2	1.69062	1.52875	2.02361	0	0	0	104.093	0	1.66115	0.495093	0.437321	0	0.344279	0	0.900384	5
5452	VPS28	full-splice_match	reference_match	FALSE	8	7	13	5	0	1	0	1	0	0	0	3	29	9	1	2.25416	1.33766	2.39154	1.14085	0	0.980804	0	2.13542	0	0	0	1.93182	9.98409	3.76359	0.450192	8
5459	VPS28	novel_in_catalog	combination_of_known_junctions	FALSE	25	23	10	2	25	0	0	0	7	6	5	1	10	7	276	7.04424	4.39516	1.83965	0.456341	17.8454	0	0	0	3.87602	2.97056	2.1866	0.643941	3.44279	2.92724	124.253	10
5492	VPS28	novel_not_in_catalog	Alt3	FALSE	4	2	3	7	0	0	2	1	2	0	0	0	2	0	1	1.12708	0.382188	0.551895	1.59719	0	0	3.25289	2.13542	1.10743	0	0	0	0.688558	0	0.450192	5
5507	MIR124-1HG	full-splice_match	mono-exon	FALSE	361	95	320	274	424	210	135	143	351	354	1009	597	404	201	717	101.719	18.1539	58.8688	62.5187	302.659	205.969	219.57	305.366	194.355	175.263	441.257	384.433	139.089	84.0536	322.788	15
5509	MIR124-1HG	full-splice_match	alternative_5end	FALSE	20	9	14	145	35	84	19	21	28	45	178	151	32	49	1	5.63539	1.71985	2.57551	33.0847	24.9836	82.3875	30.9025	44.8439	15.5041	22.2792	77.8431	97.2351	11.0169	20.4907	0.450192	14
5510	MIR124-1HG	full-splice_match	alternative_3end5end	FALSE	11	7	8	12	7	8	3	18	1110	11	14	10	7	4	7	3.09947	1.33766	1.47172	2.73805	4.99672	7.84643	4.87934	38.4376	614.625	5.44602	6.12249	6.43941	2.40995	1.67271	3.15134	15
5511	MIR124-1HG	full-splice_match	alternative_5end	FALSE	6	1	6	0	0	0	1	3	0	2	1	100	2	1	1	1.69062	0.191094	1.10379	0	0	0	1.62645	6.40627	0	0.990186	0.437321	64.3941	0.688558	0.418177	0.450192	5
5512	MIR124-1HG	full-splice_match	alternative_5end	FALSE	5	3	0	3	4	3	2	3	3	3	7	1	2	1	5	1.40885	0.573282	0	0.684512	2.85527	2.94241	3.25289	6.40627	1.66115	1.48528	3.06125	0.643941	0.688558	0.418177	2.25096	9
5521	MFHAS1	full-splice_match	alternative_3end5end	FALSE	6	14	11	18	0	0	0	0	4	3	12	7	9	0	5	1.69062	2.67532	2.02361	4.10707	0	0	0	0	2.21487	1.48528	5.24785	4.50759	3.09851	0	2.25096	10
5553	ENSG00000285349	novel_not_in_catalog	UTR_UTR	TRUE	18	0	25	0	9	0	5	0	6	8	14	16	17	10	9	5.07185	0	4.59912	0	6.42436	0	8.13224	0	3.3223	3.96075	6.12249	10.3031	5.85274	4.18177	4.05173	11
5556	DEFB131E	full-splice_match	mono-exon	FALSE	3	5	12	4	1	2	2	2	8	5	14	1	20	5	16	0.845309	0.95547	2.20758	0.912682	0.713818	1.96161	3.25289	4.27085	4.42973	2.47547	6.12249	0.643941	6.88558	2.09089	7.20307	10
5558	CTSB	incomplete-splice_match	5prime_fragment	FALSE	10	0	9	0	2	0	0	0	2	1	5	4	6	0	5	2.8177	0	1.65568	0	1.42764	0	0	0	1.10743	0.495093	2.1866	2.57576	2.06567	0	2.25096	8
5564	CTSB	full-splice_match	alternative_3end	FALSE	5	0	0	0	3	54	0	0	0	0	0	0	136	0	0	1.40885	0	0	0	2.14145	52.9634	0	0	0	0	0	0	46.822	0	0	4
5576	AGPAT5	full-splice_match	alternative_3end5end	FALSE	8	15	17	197	0	0	0	0	3	1	0	4	0	2	1	2.25416	2.86641	3.1274	44.9496	0	0	0	0	1.66115	0.495093	0	2.57576	0	0.836354	0.450192	6
5585	ENSG00000285276	full-splice_match	mono-exon	FALSE	14	13	27	25	4	7	2	7	20	15	11	10	17	27	62	3.94478	2.48422	4.96705	5.70426	2.85527	6.86563	3.25289	14.948	11.0743	7.4264	4.81053	6.43941	5.85274	11.2908	27.9119	15
5586	ENSG00000292292	full-splice_match	mono-exon	FALSE	3	11	8	8	4	7	1	4	4	10	9	10	8	6	20	0.845309	2.10204	1.47172	1.82536	2.85527	6.86563	1.62645	8.5417	2.21487	4.95093	3.93589	6.43941	2.75423	2.50906	9.00384	14
5588	ENSG00000284801	full-splice_match	mono-exon	FALSE	9	3	2	43	23	8	3	6	13	6	1	7	22	16	50	2.53593	0.573282	0.36793	9.81133	16.4178	7.84643	4.87934	12.8125	7.19832	2.97056	0.437321	4.50759	7.57414	6.69083	22.5096	12
5592	ENSG00000285403	full-splice_match	mono-exon	FALSE	10	8	16	31	15	6	12	6	16	38	22	16	34	17	36	2.8177	1.52875	2.94344	7.07329	10.7073	5.88482	19.5174	12.8125	8.85947	18.8135	9.62106	10.3031	11.7055	7.10901	16.2069	15
5620	TNKS	incomplete-splice_match	3prime_fragment	FALSE	6	0	0	0	3	0	0	0	2	5	0	2	4	0	4	1.69062	0	0	0	2.14145	0	0	0	1.10743	2.47547	0	1.28788	1.37712	0	1.80077	7
5624	TNKS	incomplete-splice_match	5prime_fragment	FALSE	15	25	16	15	12	9	0	1	13	2	1	2	12	6	5	4.22655	4.77735	2.94344	3.42256	8.56581	8.82723	0	2.13542	7.19832	0.990186	0.437321	1.28788	4.13135	2.50906	2.25096	12
5625	TNKS	incomplete-splice_match	5prime_fragment	FALSE	2	1	2	0	3	2	0	1	0	0	2	2	1	0	0	0.563539	0.191094	0.36793	0	2.14145	1.96161	0	2.13542	0	0	0.874642	1.28788	0.344279	0	0	4
5626	TNKS	full-splice_match	mono-exon	FALSE	12	7	6	1	4	4	7	1	4	3	4	3	5	4	5	3.38124	1.33766	1.10379	0.228171	2.85527	3.92321	11.3851	2.13542	2.21487	1.48528	1.74928	1.93182	1.7214	1.67271	2.25096	14
5627	OR7E154P	full-splice_match	mono-exon	FALSE	12	9	10	3	5	2	3	3	2	5	7	10	15	4	12	3.38124	1.71985	1.83965	0.684512	3.56909	1.96161	4.87934	6.40627	1.10743	2.47547	3.06125	6.43941	5.16419	1.67271	5.40231	14
5629	ERI1	incomplete-splice_match	5prime_fragment	FALSE	6	5	8	0	2	1	1	0	4	0	0	1	0	0	0	1.69062	0.95547	1.47172	0	1.42764	0.980804	1.62645	0	2.21487	0	0	0.643941	0	0	0	5
5635	MCPH1-AS1	full-splice_match	alternative_3end	FALSE	3	3	10	0	0	1	1	0	4	0	0	3	0	2	0	0.845309	0.573282	1.83965	0	0	0.980804	1.62645	0	2.21487	0	0	1.93182	0	0.836354	0	4
5640	RPS3AP34	full-splice_match	mono-exon	FALSE	2	2	0	2	2	5	1	1	2	3	7	2	0	4	0	0.563539	0.382188	0	0.456341	1.42764	4.90402	1.62645	2.13542	1.10743	1.48528	3.06125	1.28788	0	1.67271	0	9
5641	ENSG00000284992	novel_not_in_catalog	UTR_UTR	TRUE	16	7	13	2	0	6	0	0	0	11	13	11	11	10	0	4.50831	1.33766	2.39154	0.456341	0	5.88482	0	0	0	5.44602	5.68517	7.08335	3.78707	4.18177	0	9
5646	LONRF1	full-splice_match	alternative_3end5end	FALSE	4	0	0	5	0	0	0	0	0	98	2	42	0	4	0	1.12708	0	0	1.14085	0	0	0	0	0	48.5191	0.874642	27.0455	0	1.67271	0	5
5658	FDFT1	full-splice_match	alternative_3end	FALSE	354	475	369	131	9	29	0	0	159	139	25	10	264	207	0	99.7465	90.7697	67.8831	29.8903	6.42436	28.4433	0	0	88.0409	68.8179	10.933	6.43941	90.8897	86.5627	0	12
5659	FDFT1	incomplete-splice_match	3prime_fragment	FALSE	6	2	0	1	0	5	22	0	103	0	1	0	2	0	0	1.69062	0.382188	0	0.228171	0	4.90402	35.7818	0	57.0328	0	0.437321	0	0.688558	0	0	4
5660	FDFT1	full-splice_match	reference_match	FALSE	3	29	31	253	0	8	0	0	3	19	0	0	0	1	20	0.845309	5.54173	5.70291	57.7272	0	7.84643	0	0	1.66115	9.40677	0	0	0	0.418177	9.00384	7
5661	FDFT1	incomplete-splice_match	3prime_fragment	FALSE	3	45	2	1	0	0	5	21	0	0	1	3	128	0	64	0.845309	8.59923	0.36793	0.228171	0	0	8.13224	44.8439	0	0	0.437321	1.93182	44.0677	0	28.8123	6
5664	FDFT1	incomplete-splice_match	5prime_fragment	FALSE	13	12	8	11	3	1	2	0	0	0	1	2	6	6	0	3.66301	2.29313	1.47172	2.50988	2.14145	0.980804	3.25289	0	0	0	0.437321	1.28788	2.06567	2.50906	0	9
5667	FDFT1	incomplete-splice_match	5prime_fragment	FALSE	3	1	1	0	1	1	0	0	2	1	3	3	3	3	0	0.845309	0.191094	0.183965	0	0.713818	0.980804	0	0	1.10743	0.495093	1.31196	1.93182	1.03284	1.25453	0	5
5671	SLC35G5	full-splice_match	mono-exon	FALSE	3	2	5	1	2	1	0	2	0	1	1	2	4	0	1	0.845309	0.382188	0.919825	0.228171	1.42764	0.980804	0	4.27085	0	0.495093	0.437321	1.28788	1.37712	0	0.450192	4
5675	MTMR9	incomplete-splice_match	5prime_fragment	FALSE	2	7	4	1	3	2	3	0	0	0	0	1	0	0	0	0.563539	1.33766	0.73586	0.228171	2.14145	1.96161	4.87934	0	0	0	0	0.643941	0	0	0	4
5676	MTMR9	incomplete-splice_match	5prime_fragment	FALSE	7	3	10	0	0	2	2	1	2	3	3	3	1	1	0	1.97239	0.573282	1.83965	0	0	1.96161	3.25289	2.13542	1.10743	1.48528	1.31196	1.93182	0.344279	0.418177	0	9
5684	ENSG00000285392	full-splice_match	mono-exon	FALSE	21	83	108	34	4	16	9	5	27	68	34	24	84	30	248	5.91716	15.8608	19.8682	7.7578	2.85527	15.6929	14.638	10.6771	14.9503	33.6663	14.8689	15.4546	28.9194	12.5453	111.648	15
5688	ENSG00000292299	full-splice_match	mono-exon	FALSE	20	15	59	48	30	29	17	13	14	42	52	57	57	61	39	5.63539	2.86641	10.8539	10.9522	21.4145	28.4433	27.6496	27.7605	7.75203	20.7939	22.7407	36.7046	19.6239	25.5088	17.5575	15
5690	MSRA	incomplete-splice_match	3prime_fragment	FALSE	36	0	1	0	2	2	0	2	0	46	32	1	2	1	5	10.1437	0	0.183965	0	1.42764	1.96161	0	4.27085	0	22.7743	13.9943	0.643941	0.688558	0.418177	2.25096	7
5691	MSRA	full-splice_match	alternative_5end	FALSE	14	11	23	99	3	8	6	2	25	2	44	1	104	7	2	3.94478	2.10204	4.23119	22.5889	2.14145	7.84643	9.75868	4.27085	13.8429	0.990186	19.2421	0.643941	35.805	2.92724	0.900384	12
5694	MSRA	novel_not_in_catalog	novel_exon	FALSE	5	23	7	3	3	2	0	0	0	3	1	53	2	30	7	1.40885	4.39516	1.28775	0.684512	2.14145	1.96161	0	0	0	1.48528	0.437321	34.1289	0.688558	12.5453	3.15134	9
5701	MSRA	full-splice_match	reference_match	FALSE	4	4	47	0	0	1	2	0	0	0	1	0	6	0	9	1.12708	0.764376	8.64635	0	0	0.980804	3.25289	0	0	0	0.437321	0	2.06567	0	4.05173	5
5706	MSRA	novel_not_in_catalog	novel_exon	FALSE	5	1	1	1	1	1	0	0	2	1	1	2	4	9	5	1.40885	0.191094	0.183965	0.228171	0.713818	0.980804	0	0	1.10743	0.495093	0.437321	1.28788	1.37712	3.76359	2.25096	6
5716	ADIPOR2	novel_in_catalog	combination_of_known_splicesites	FALSE	19	50	23	24	7	5	0	0	9	2	2	6	9	6	4	5.35362	9.5547	4.23119	5.47609	4.99672	4.90402	0	0	4.98345	0.990186	0.874642	3.86365	3.09851	2.50906	1.80077	11
5717	ADIPOR2	incomplete-splice_match	5prime_fragment	FALSE	10	23	14	21	1	0	0	0	4	1	1	0	4	0	4	2.8177	4.39516	2.57551	4.79158	0.713818	0	0	0	2.21487	0.495093	0.437321	0	1.37712	0	1.80077	7
5731	ADIPOR2	novel_in_catalog	combination_of_known_splicesites	FALSE	8	2	0	56	4	0	1	0	4	2	4	10	4	0	4	2.25416	0.382188	0	12.7776	2.85527	0	1.62645	0	2.21487	0.990186	1.74928	6.43941	1.37712	0	1.80077	9
5742	DCP1B	full-splice_match	alternative_3end5end	FALSE	10	0	0	1	3	0	0	4	1	4	6	6	0	7	3	2.8177	0	0	0.228171	2.14145	0	0	8.5417	0.553717	1.98037	2.62392	3.86365	0	2.92724	1.35058	8
5745	LINC00940	full-splice_match	alternative_3end	FALSE	5	8	4	1	2	1	0	0	2	0	0	2	0	0	1	1.40885	1.52875	0.73586	0.228171	1.42764	0.980804	0	0	1.10743	0	0	1.28788	0	0	0.450192	5
5746	DCP1B	incomplete-splice_match	3prime_fragment	FALSE	3	23	0	37	2	3	0	0	2	8	1	0	0	4	5	0.845309	4.39516	0	8.44231	1.42764	2.94241	0	0	1.10743	3.96075	0.437321	0	0	1.67271	2.25096	8
5753	ENSG00000286673	novel_not_in_catalog	novel_exon	FALSE	4	2	8	7	11	5	7	0	0	7	3	8	9	4	3	1.12708	0.382188	1.47172	1.59719	7.85199	4.90402	11.3851	0	0	3.46565	1.31196	5.15153	3.09851	1.67271	1.35058	12
5754	DHRS4	full-splice_match	reference_match	FALSE	15	34	38	4	1	2	0	0	6	0	1	3	6	3	10	4.22655	6.4972	6.99067	0.912682	0.713818	1.96161	0	0	3.3223	0	0.437321	1.93182	2.06567	1.25453	4.50192	9
5756	DHRS4L1	novel_in_catalog	combination_of_known_splicesites	FALSE	1	0	3	0	2	2	2	1	0	0	3	2	0	0	2	0.28177	0	0.551895	0	1.42764	1.96161	3.25289	2.13542	0	0	1.31196	1.28788	0	0	0.900384	6
5758	DHRS4	full-splice_match	reference_match	FALSE	13	20	13	2	0	1	0	0	6	2	16	0	27	29	0	3.66301	3.82188	2.39154	0.456341	0	0.980804	0	0	3.3223	0.990186	6.99713	0	9.29554	12.1271	0	7
5760	DHRS4	full-splice_match	reference_match	FALSE	2	71	28	53	1	12	0	0	26	7	3	19	10	8	28	0.563539	13.5677	5.15102	12.093	0.713818	11.7696	0	0	14.3966	3.46565	1.31196	12.2349	3.44279	3.34542	12.6054	11
5773	DCAF11	incomplete-splice_match	intron_retention	FALSE	1	1	6	3	1	0	0	1	3	1	3	1	4	1	3	0.28177	0.191094	1.10379	0.684512	0.713818	0	0	2.13542	1.66115	0.495093	1.31196	0.643941	1.37712	0.418177	1.35058	6
5782	FITM1	full-splice_match	mono-exon	FALSE	2	2	1	1	2	1	2	2	0	2	5	4	6	3	6	0.563539	0.382188	0.183965	0.228171	1.42764	0.980804	3.25289	4.27085	0	0.990186	2.1866	2.57576	2.06567	1.25453	2.70115	8
5783	PSME1	full-splice_match	alternative_5end	FALSE	151	271	305	218	23	2	0	1	74	22	24	31	42	56	30	42.5472	51.7865	56.1093	49.7412	16.4178	1.96161	0	2.13542	40.975	10.892	10.4957	19.9622	14.4597	23.4179	13.5058	14
5786	PSME1	incomplete-splice_match	5prime_fragment	FALSE	4	1	1	5	0	0	0	0	3	0	2	0	1	3	0	1.12708	0.191094	0.183965	1.14085	0	0	0	0	1.66115	0	0.874642	0	0.344279	1.25453	0	4
5792	PSME1	incomplete-splice_match	5prime_fragment	FALSE	36	42	44	18	2	3	2	0	6	4	9	3	6	5	7	10.1437	8.02595	8.09446	4.10707	1.42764	2.94241	3.25289	0	3.3223	1.98037	3.93589	1.93182	2.06567	2.09089	3.15134	14
5796	PSME1	full-splice_match	alternative_5end	FALSE	5	16	8	0	0	0	0	0	0	0	2	0	23	9	2	1.40885	3.05751	1.47172	0	0	0	0	0	0	0	0.874642	0	7.91842	3.76359	0.900384	5
5799	EMC9	full-splice_match	reference_match	FALSE	26	9	36	3	1	0	0	0	3	1	31	3	28	3	0	7.32601	1.71985	6.62274	0.684512	0.713818	0	0	0	1.66115	0.495093	13.5569	1.93182	9.63982	1.25453	0	8
5803	EMC9	incomplete-splice_match	intron_retention	FALSE	8	3	5	26	3	0	0	10	0	0	0	0	4	0	2	2.25416	0.573282	0.919825	5.93244	2.14145	0	0	21.3542	0	0	0	0	1.37712	0	0.900384	5
5806	EMC9	full-splice_match	alternative_5end	FALSE	11	3	4	0	0	1	0	0	18	6	1	0	0	4	3	3.09947	0.573282	0.73586	0	0	0.980804	0	0	9.9669	2.97056	0.437321	0	0	1.67271	1.35058	5
5808	EMC9	novel_in_catalog	combination_of_known_junctions,intron_retention	FALSE	1	2	8	2	2	14	0	0	5	28	0	1	0	1	3	0.28177	0.382188	1.47172	0.456341	1.42764	13.7313	0	0	2.76858	13.8626	0	0.643941	0	0.418177	1.35058	6
5813	PSME2	full-splice_match	alternative_5end	FALSE	21	65	114	9	0	24	5	15	14	23	5	10	50	41	1	5.91716	12.4211	20.972	2.05354	0	23.5393	8.13224	32.0314	7.75203	11.3871	2.1866	6.43941	17.214	17.1453	0.450192	13
5814	PSME2	incomplete-splice_match	3prime_fragment	FALSE	3	31	0	33	3	1	0	2	1	1	0	1	4	0	2	0.845309	5.92392	0	7.52963	2.14145	0.980804	0	4.27085	0.553717	0.495093	0	0.643941	1.37712	0	0.900384	5
5815	PSME2	full-splice_match	alternative_5end	FALSE	1	1	0	0	27	1	0	2	3	2	1	14	0	1	0	0.28177	0.191094	0	0	19.2731	0.980804	0	4.27085	1.66115	0.990186	0.437321	9.01518	0	0.418177	0	4
5816	PSME2	full-splice_match	mono-exon	FALSE	1	2	2	1	1	1	4	0	1	1	1	2	3	1	6	0.28177	0.382188	0.36793	0.228171	0.713818	0.980804	6.50579	0	0.553717	0.495093	0.437321	1.28788	1.03284	0.418177	2.70115	4
5822	IRF9	full-splice_match	alternative_3end5end	FALSE	8	5	17	2	6	4	0	1	2	0	4	1	1	3	2	2.25416	0.95547	3.1274	0.456341	4.28291	3.92321	0	2.13542	1.10743	0	1.74928	0.643941	0.344279	1.25453	0.900384	8
5826	IRF9	full-splice_match	alternative_3end5end	FALSE	1	6	4	8	2	2	1	0	3	2	4	1	3	4	5	0.28177	1.14656	0.73586	1.82536	1.42764	1.96161	1.62645	0	1.66115	0.990186	1.74928	0.643941	1.03284	1.67271	2.25096	10
5827	IRF9	full-splice_match	reference_match	FALSE	23	24	43	75	6	1	4	0	0	0	0	12	38	0	0	6.4807	4.58626	7.91049	17.1128	4.28291	0.980804	6.50579	0	0	0	0	7.72729	13.0826	0	0	8
5831	REC8	incomplete-splice_match	3prime_fragment	FALSE	19	0	0	0	0	18	18	0	0	0	0	0	30	0	0	5.35362	0	0	0	0	17.6545	29.2761	0	0	0	0	0	10.3284	0	0	4
5832	IPO4	incomplete-splice_match	3prime_fragment	FALSE	9	0	0	0	0	0	1	0	5	0	0	0	3	5	0	2.53593	0	0	0	0	0	1.62645	0	2.76858	0	0	0	1.03284	2.09089	0	5
5842	GMPR2	full-splice_match	reference_match	FALSE	1	1	5	0	0	0	0	0	0	33	39	0	74	33	0	0.28177	0.191094	0.919825	0	0	0	0	0	0	16.3381	17.0555	0	25.4767	13.7998	0	4
5844	ENSG00000287436	full-splice_match	reference_match	FALSE	33	19	54	30	6	1	0	1	16	2	12	13	9	15	13	9.2984	3.63079	9.93411	6.84512	4.28291	0.980804	0	2.13542	8.85947	0.990186	5.24785	8.37123	3.09851	6.27266	5.8525	12
5848	ENSG00000284802	full-splice_match	mono-exon	FALSE	4	0	4	8	2	2	2	0	2	4	9	4	8	1	3	1.12708	0	0.73586	1.82536	1.42764	1.96161	3.25289	0	1.10743	1.98037	3.93589	2.57576	2.75423	0.418177	1.35058	11
5849	TM9SF1	full-splice_match	reference_match	FALSE	45	92	0	118	0	0	0	0	0	0	0	0	77	0	0	12.6796	17.5807	0	26.9241	0	0	0	0	0	0	0	0	26.5095	0	0	4
5853	TM9SF1	incomplete-splice_match	5prime_fragment	FALSE	3	3	16	0	2	2	0	0	0	3	0	3	2	0	0	0.845309	0.573282	2.94344	0	1.42764	1.96161	0	0	0	1.48528	0	1.93182	0.688558	0	0	5
5854	ENSG00000285309	full-splice_match	mono-exon	FALSE	9	23	9	18	8	13	4	7	4	12	20	11	20	4	11	2.53593	4.39516	1.65568	4.10707	5.71054	12.7504	6.50579	14.948	2.21487	5.94112	8.74642	7.08335	6.88558	1.67271	4.95211	15
5857	CHMP4A	full-splice_match	alternative_3end5end	FALSE	56	114	106	67	2	3	0	2	23	17	28	19	3	44	7	15.7791	21.7847	19.5003	15.2874	1.42764	2.94241	0	4.27085	12.7355	8.41658	12.245	12.2349	1.03284	18.3998	3.15134	14
5858	CHMP4A	full-splice_match	alternative_3end	FALSE	14	7	9	4	0	3	1	0	3	0	3	5	3	3	5	3.94478	1.33766	1.65568	0.912682	0	2.94241	1.62645	0	1.66115	0	1.31196	3.21971	1.03284	1.25453	2.25096	11
5859	CHMP4A	incomplete-splice_match	5prime_fragment	FALSE	11	6	6	0	1	0	0	0	4	2	2	1	1	2	1	3.09947	1.14656	1.10379	0	0.713818	0	0	0	2.21487	0.990186	0.874642	0.643941	0.344279	0.836354	0.450192	4
5864	MDP1	full-splice_match	alternative_5end	FALSE	5	0	6	0	4	0	0	0	0	0	0	1	2	3	0	1.40885	0	1.10379	0	2.85527	0	0	0	0	0	0	0.643941	0.688558	1.25453	0	4
5870	MDP1	full-splice_match	alternative_3end5end	FALSE	1	4	0	0	0	2	1	0	1	10	15	0	4	9	6	0.28177	0.764376	0	0	0	1.96161	1.62645	0	0.553717	4.95093	6.55981	0	1.37712	3.76359	2.70115	7
5874	MDP1	full-splice_match	reference_match	FALSE	46	31	64	24	0	1	0	2	23	3	9	8	4	5	5	12.9614	5.92392	11.7738	5.47609	0	0.980804	0	4.27085	12.7355	1.48528	3.93589	5.15153	1.37712	2.09089	2.25096	12
5876	NEDD8	full-splice_match	alternative_5end	FALSE	709	539	936	447	137	98	77	81	248	338	479	261	450	309	318	199.775	103	172.191	101.992	97.793	96.1188	125.236	172.969	137.322	167.341	209.477	168.069	154.926	129.217	143.161	15
5877	NEDD8	novel_in_catalog	combination_of_known_splicesites	FALSE	6	18	15	1	0	0	0	0	2	0	0	0	0	3	0	1.69062	3.43969	2.75947	0.228171	0	0	0	0	1.10743	0	0	0	0	1.25453	0	5
5880	NEDD8	full-splice_match	alternative_5end	FALSE	17	16	27	17	4	0	1	1	2	9	2	1	8	15	10	4.79008	3.05751	4.96705	3.8789	2.85527	0	1.62645	2.13542	1.10743	4.45584	0.874642	0.643941	2.75423	6.27266	4.50192	12
5887	MDP1	novel_in_catalog	combination_of_known_junctions	FALSE	7	6	13	2	0	0	0	0	0	0	0	3	0	4	2	1.97239	1.14656	2.39154	0.456341	0	0	0	0	0	0	0	1.93182	0	1.67271	0.900384	5
5890	NEDD8	full-splice_match	alternative_3end	FALSE	20	6	22	8	2	3	1	0	7	0	7	8	4	7	6	5.63539	1.14656	4.04723	1.82536	1.42764	2.94241	1.62645	0	3.87602	0	3.06125	5.15153	1.37712	2.92724	2.70115	13
5895	ENSG00000285296	incomplete-splice_match	5prime_fragment	FALSE	4	7	8	3	0	6	1	0	2	1	1	0	7	2	0	1.12708	1.33766	1.47172	0.684512	0	5.88482	1.62645	0	1.10743	0.495093	0.437321	0	2.40995	0.836354	0	7
5910	DHRS1	full-splice_match	alternative_5end	FALSE	3	99	1	62	4	0	2	34	1	44	53	4	2	0	81	0.845309	18.9183	0.183965	14.1466	2.85527	0	3.25289	72.6044	0.553717	21.7841	23.178	2.57576	0.688558	0	36.4656	9
5911	DHRS1	full-splice_match	reference_match	FALSE	8	8	11	5	0	0	0	0	0	0	0	55	0	3	0	2.25416	1.52875	2.02361	1.14085	0	0	0	0	0	0	0	35.4168	0	1.25453	0	6
5914	LTB4R2	full-splice_match	mono-exon	FALSE	12	37	14	40	3	2	10	2	11	15	13	11	16	16	11	3.38124	7.07048	2.57551	9.12682	2.14145	1.96161	16.2645	4.27085	6.09088	7.4264	5.68517	7.08335	5.50847	6.69083	4.95211	15
5920	EEFSEC	incomplete-splice_match	5prime_fragment	FALSE	8	3	11	1	0	1	4	3	2	2	3	3	4	3	3	2.25416	0.573282	2.02361	0.228171	0	0.980804	6.50579	6.40627	1.10743	0.990186	1.31196	1.93182	1.37712	1.25453	1.35058	10
5922	EEFSEC	incomplete-splice_match	3prime_fragment	FALSE	3	15	20	0	0	3	0	0	0	18	0	0	27	0	12	0.845309	2.86641	3.6793	0	0	2.94241	0	0	0	8.91168	0	0	9.29554	0	5.40231	6
5925	GRM5P1	incomplete-splice_match	3prime_fragment	FALSE	11	0	0	0	16	0	0	0	0	0	0	8	1	0	39	3.09947	0	0	0	11.4211	0	0	0	0	0	0	5.15153	0.344279	0	17.5575	4
5938	C1QTNF4	full-splice_match	alternative_5end	FALSE	183	151	208	186	61	11	28	23	77	122	139	111	199	115	73	51.5638	28.8552	38.2647	42.4397	43.5429	10.7888	45.5405	49.1148	42.6362	60.4014	60.7876	71.4775	68.5115	48.0904	32.864	15
5941	MTCH2	incomplete-splice_match	5prime_fragment	FALSE	3	1	3	0	2	2	0	0	0	1	5	4	1	2	3	0.845309	0.191094	0.551895	0	1.42764	1.96161	0	0	0	0.495093	2.1866	2.57576	0.344279	0.836354	1.35058	5
5944	FNBP4	incomplete-splice_match	3prime_fragment	FALSE	34	85	0	110	0	0	0	0	0	0	3	0	0	1	0	9.58017	16.243	0	25.0988	0	0	0	0	0	0	1.31196	0	0	0.418177	0	4
5954	FNBP4	incomplete-splice_match	5prime_fragment	FALSE	13	5	3	0	0	2	2	0	2	0	0	4	0	4	2	3.66301	0.95547	0.551895	0	0	1.96161	3.25289	0	1.10743	0	0	2.57576	0	1.67271	0.900384	6
5958	MTCH2	full-splice_match	alternative_3end	FALSE	36	43	65	5	7	0	0	0	16	23	41	0	25	13	5	10.1437	8.21705	11.9577	1.14085	4.99672	0	0	0	8.85947	11.3871	17.9302	0	8.60698	5.4363	2.25096	11
5969	MTCH2	incomplete-splice_match	5prime_fragment	FALSE	3	3	4	2	0	3	2	0	1	0	4	4	0	1	2	0.845309	0.573282	0.73586	0.456341	0	2.94241	3.25289	0	0.553717	0	1.74928	2.57576	0	0.418177	0.900384	4
5974	NAALAD2	incomplete-splice_match	internal_fragment	FALSE	5	0	1	0	9	9	6	3	5	3	6	2	4	2	11	1.40885	0	0.183965	0	6.42436	8.82723	9.75868	6.40627	2.76858	1.48528	2.62392	1.28788	1.37712	0.836354	4.95211	11
5975	NAALAD2	incomplete-splice_match	3prime_fragment	FALSE	3	3	4	2	3	1	1	0	3	3	1	6	2	0	5	0.845309	0.573282	0.73586	0.456341	2.14145	0.980804	1.62645	0	1.66115	1.48528	0.437321	3.86365	0.688558	0	2.25096	6
5981	NAALAD2	incomplete-splice_match	5prime_fragment	FALSE	1	0	13	1	2	0	1	0	5	16	2	0	0	0	11	0.28177	0	2.39154	0.228171	1.42764	0	1.62645	0	2.76858	7.92149	0.874642	0	0	0	4.95211	6
5984	ENSG00000285305	full-splice_match	mono-exon	FALSE	5	1	2	3	3	3	1	0	5	13	4	2	3	3	1	1.40885	0.191094	0.36793	0.684512	2.14145	2.94241	1.62645	0	2.76858	6.43621	1.74928	1.28788	1.03284	1.25453	0.450192	10
5987	ENSG00000285065	full-splice_match	mono-exon	FALSE	9	4	14	2	14	6	3	2	5	5	25	11	4	16	37	2.53593	0.764376	2.57551	0.456341	9.99345	5.88482	4.87934	4.27085	2.76858	2.47547	10.933	7.08335	1.37712	6.69083	16.6571	13
5989	CHORDC1	full-splice_match	alternative_3end	FALSE	5	116	46	115	39	0	13	0	4	1	13	42	86	49	6	1.40885	22.1669	8.46239	26.2396	27.8389	0	21.1438	0	2.21487	0.495093	5.68517	27.0455	29.608	20.4907	2.70115	12
5990	CHORDC1	incomplete-splice_match	5prime_fragment	FALSE	1	11	10	6	2	0	1	0	0	0	0	2	3	7	6	0.28177	2.10204	1.83965	1.36902	1.42764	0	1.62645	0	0	0	0	1.28788	1.03284	2.92724	2.70115	9
5992	CHORDC1	incomplete-splice_match	5prime_fragment	FALSE	2	19	0	17	10	0	1	0	2	2	10	2	6	9	6	0.563539	3.63079	0	3.8789	7.13818	0	1.62645	0	1.10743	0.990186	4.37321	1.28788	2.06567	3.76359	2.70115	10
5995	CHORDC1	incomplete-splice_match	3prime_fragment	FALSE	25	2	0	0	4	2	0	5	0	14	45	0	27	17	8	7.04424	0.382188	0	0	2.85527	1.96161	0	10.6771	0	6.9313	19.6794	0	9.29554	7.10901	3.60154	9
5998	CHORDC1	incomplete-splice_match	5prime_fragment	FALSE	19	17	12	7	9	3	1	4	5	2	19	7	16	40	20	5.35362	3.2486	2.20758	1.59719	6.42436	2.94241	1.62645	8.5417	2.76858	0.990186	8.30909	4.50759	5.50847	16.7271	9.00384	14
5999	CHORDC1	incomplete-splice_match	5prime_fragment	FALSE	2	1	3	2	3	2	0	1	1	1	3	4	1	8	2	0.563539	0.191094	0.551895	0.456341	2.14145	1.96161	0	2.13542	0.553717	0.495093	1.31196	2.57576	0.344279	3.34542	0.900384	6
6000	CHORDC1	full-splice_match	alternative_3end5end	FALSE	2	3	0	0	0	17	0	0	0	42	17	0	0	5	0	0.563539	0.573282	0	0	0	16.6737	0	0	0	20.7939	7.43445	0	0	2.09089	0	4
6005	ENSG00000285009	full-splice_match	mono-exon	FALSE	2	0	1	1	1	2	0	1	1	3	3	1	1	0	1	0.563539	0	0.183965	0.228171	0.713818	1.96161	0	2.13542	0.553717	1.48528	1.31196	0.643941	0.344279	0	0.450192	4
6006	XYLT1	incomplete-splice_match	5prime_fragment	FALSE	1	0	0	1	0	0	2	1	0	1	0	1	4	3	0	0.28177	0	0	0.228171	0	0	3.25289	2.13542	0	0.495093	0	0.643941	1.37712	1.25453	0	4
6017	FAM86DP	full-splice_match	alternative_3end	FALSE	5	3	12	4	0	1	0	0	1	3	1	0	3	0	2	1.40885	0.573282	2.20758	0.912682	0	0.980804	0	0	0.553717	1.48528	0.437321	0	1.03284	0	0.900384	4
6047	MRPL23	full-splice_match	alternative_5end	FALSE	113	69	0	148	21	12	15	11	50	38	37	31	48	42	18	31.84	13.1855	0	33.7692	14.9902	11.7696	24.3967	23.4897	27.6858	18.8135	16.1809	19.9622	16.5254	17.5634	8.10346	14
6053	PPFIA1	incomplete-splice_match	5prime_fragment	FALSE	5	11	8	0	2	1	0	0	0	0	0	0	2	4	4	1.40885	2.10204	1.47172	0	1.42764	0.980804	0	0	0	0	0	0	0.688558	1.67271	1.80077	6
6054	PPFIA1	incomplete-splice_match	5prime_fragment	FALSE	6	4	4	4	0	3	0	0	2	2	2	5	2	5	0	1.69062	0.764376	0.73586	0.912682	0	2.94241	0	0	1.10743	0.990186	0.874642	3.21971	0.688558	2.09089	0	5
6065	CTTN	incomplete-splice_match	5prime_fragment	FALSE	26	15	17	5	13	7	3	5	11	4	11	26	12	13	14	7.32601	2.86641	3.1274	1.14085	9.27963	6.86563	4.87934	10.6771	6.09088	1.98037	4.81053	16.7425	4.13135	5.4363	6.30269	15
6066	CTTN	full-splice_match	alternative_3end	FALSE	29	38	33	21	8	8	0	3	10	2	13	2	5	19	30	8.17132	7.26158	6.07084	4.79158	5.71054	7.84643	0	6.40627	5.53717	0.990186	5.68517	1.28788	1.7214	7.94537	13.5058	13
6077	HPS5	incomplete-splice_match	3prime_fragment	FALSE	1	3	0	14	5	1	0	1	0	4	0	1	0	0	1	0.28177	0.573282	0	3.19439	3.56909	0.980804	0	2.13542	0	1.98037	0	0.643941	0	0	0.450192	4
6084	GTF2H1	incomplete-splice_match	5prime_fragment	FALSE	7	5	7	3	1	0	1	0	2	1	1	3	2	2	1	1.97239	0.95547	1.28775	0.684512	0.713818	0	1.62645	0	1.10743	0.495093	0.437321	1.93182	0.688558	0.836354	0.450192	5
6093	GTF2H1	full-splice_match	alternative_3end	FALSE	1	2	2	3	1	3	0	2	1	0	1	4	0	3	0	0.28177	0.382188	0.36793	0.684512	0.713818	2.94241	0	4.27085	0.553717	0	0.437321	2.57576	0	1.25453	0	4
6095	LDHA	incomplete-splice_match	5prime_fragment	FALSE	5	5	6	5	0	0	0	0	2	2	1	0	3	4	0	1.40885	0.95547	1.10379	1.14085	0	0	0	0	1.10743	0.990186	0.437321	0	1.03284	1.67271	0	6
6097	LDHA	full-splice_match	alternative_3end	FALSE	15	11	14	3	1	0	2	0	7	4	16	3	4	17	8	4.22655	2.10204	2.57551	0.684512	0.713818	0	3.25289	0	3.87602	1.98037	6.99713	1.93182	1.37712	7.10901	3.60154	11
6098	LDHA	full-splice_match	reference_match	FALSE	4	15	13	5	5	0	0	1	3	1	5	0	4	5	8	1.12708	2.86641	2.39154	1.14085	3.56909	0	0	2.13542	1.66115	0.495093	2.1866	0	1.37712	2.09089	3.60154	11
6100	LDHA	incomplete-splice_match	5prime_fragment	FALSE	11	6	7	5	1	0	0	0	0	0	0	0	0	0	0	3.09947	1.14656	1.28775	1.14085	0.713818	0	0	0	0	0	0	0	0	0	0	4
6101	LDHA	incomplete-splice_match	5prime_fragment	FALSE	7	7	8	1	0	0	0	0	0	0	7	1	4	4	2	1.97239	1.33766	1.47172	0.228171	0	0	0	0	0	0	3.06125	0.643941	1.37712	1.67271	0.900384	6
6103	LDHA	full-splice_match	alternative_3end	FALSE	45	474	460	0	63	28	0	0	93	173	256	78	297	167	178	12.6796	90.5786	84.6239	0	44.9705	27.4625	0	0	51.4956	85.6511	111.954	50.2274	102.251	69.8356	80.1342	12
6105	NOC4L	full-splice_match	reference_match	FALSE	24	25	6	0	0	0	4	0	0	0	0	10	0	13	8	6.76247	4.77735	1.10379	0	0	0	6.50579	0	0	0	0	6.43941	0	5.4363	3.60154	7
6111	GALNT9	incomplete-splice_match	3prime_fragment	FALSE	19	0	27	86	5	0	0	0	0	79	263	0	0	0	171	5.35362	0	4.96705	19.6227	3.56909	0	0	0	0	39.1124	115.015	0	0	0	76.9828	7
6113	GALNT9	incomplete-splice_match	3prime_fragment	FALSE	1	53	0	2	0	2	0	47	48	1	1	0	0	103	0	0.28177	10.128	0	0.456341	0	1.96161	0	100.365	26.5784	0.495093	0.437321	0	0	43.0722	0	5
6114	GALNT9	full-splice_match	mono-exon	FALSE	4	0	7	0	31	5	5	6	0	0	18	7	5	33	12	1.12708	0	1.28775	0	22.1283	4.90402	8.13224	12.8125	0	0	7.87177	4.50759	1.7214	13.7998	5.40231	11
6115	ENSG00000288376_ENSG00000288458	fusion	multi-exon	FALSE	32	0	7	0	0	0	0	40	0	0	52	0	0	173	91	9.01663	0	1.28775	0	0	0	0	85.417	0	0	22.7407	0	0	72.3446	40.9675	6
6117	ENSG00000288376_ENSG00000288458	fusion	multi-exon	FALSE	11	0	9	0	0	0	0	9	19	39	5	0	0	17	4	3.09947	0	1.65568	0	0	0	0	19.2188	10.5206	19.3086	2.1866	0	0	7.10901	1.80077	8
6118	ENSG00000288376	full-splice_match	mono-exon	FALSE	5	0	0	10	5	0	47	0	3	0	0	11	3	2	4	1.40885	0	0	2.28171	3.56909	0	76.443	0	1.66115	0	0	7.08335	1.03284	0.836354	1.80077	8
6125	CLSTN3	incomplete-splice_match	3prime_fragment	FALSE	1	1	1	144	17	0	0	7	0	0	0	0	2	1	3	0.28177	0.191094	0.183965	32.8566	12.1349	0	0	14.948	0	0	0	0	0.688558	0.418177	1.35058	4
6131	ENSG00000288147	novel_not_in_catalog	novel_exon	FALSE	9	10	10	1	1	4	0	0	6	1	1	3	10	4	2	2.53593	1.91094	1.83965	0.228171	0.713818	3.92321	0	0	3.3223	0.495093	0.437321	1.93182	3.44279	1.67271	0.900384	8
6145	ENSG00000290631	incomplete-splice_match	3prime_fragment	FALSE	6	0	0	0	0	1	0	0	117	0	228	189	0	0	0	1.69062	0	0	0	0	0.980804	0	0	64.7848	0	99.7091	121.705	0	0	0	4
6146	ENSG00000290631	incomplete-splice_match	3prime_fragment	FALSE	1	2	4	2	0	2	2	3	1	5	1	1	2	1	6	0.28177	0.382188	0.73586	0.456341	0	1.96161	3.25289	6.40627	0.553717	2.47547	0.437321	0.643941	0.688558	0.418177	2.70115	5
6147	ENSG00000290631	incomplete-splice_match	intron_retention	FALSE	8	7	10	6	2	13	0	1	1	5	0	7	1	2	8	2.25416	1.33766	1.83965	1.36902	1.42764	12.7504	0	2.13542	0.553717	2.47547	0	4.50759	0.344279	0.836354	3.60154	10
6192	NIPA1	full-splice_match	alternative_3end	FALSE	34	21	21	44	2	2	0	2	2	0	0	11	0	5	0	9.58017	4.01298	3.86326	10.0395	1.42764	1.96161	0	4.27085	1.10743	0	0	7.08335	0	2.09089	0	10
6193	NIPA1	incomplete-splice_match	5prime_fragment	FALSE	5	2	3	1	5	1	2	0	3	1	6	4	2	0	3	1.40885	0.382188	0.551895	0.228171	3.56909	0.980804	3.25289	0	1.66115	0.495093	2.62392	2.57576	0.688558	0	1.35058	7
6202	ENSG00000288405	novel_not_in_catalog	novel_exon	FALSE	7	6	6	7	0	0	0	0	6	0	0	0	0	0	0	1.97239	1.14656	1.10379	1.59719	0	0	0	0	3.3223	0	0	0	0	0	0	5
6222	CYFIP1	incomplete-splice_match	3prime_fragment	FALSE	44	0	0	0	0	0	0	0	36	0	0	57	106	2	0	12.3979	0	0	0	0	0	0	0	19.9338	0	0	36.7046	36.4936	0.836354	0	4
6230	CYFIP1	novel_not_in_catalog	novel_exon	FALSE	7	0	1	5	3	1	0	0	4	5	0	4	2	0	1	1.97239	0	0.183965	1.14085	2.14145	0.980804	0	0	2.21487	2.47547	0	2.57576	0.688558	0	0.450192	6
6250	MAGEL2	full-splice_match	mono-exon	FALSE	10	18	8	26	8	7	0	3	11	25	26	15	48	42	14	2.8177	3.43969	1.47172	5.93244	5.71054	6.86563	0	6.40627	6.09088	12.3773	11.3703	9.65912	16.5254	17.5634	6.30269	14
6265	SLC5A11	incomplete-splice_match	5prime_fragment	FALSE	3	1	26	3	3	1	0	0	11	0	1	0	0	2	3	0.845309	0.191094	4.78309	0.684512	2.14145	0.980804	0	0	6.09088	0	0.437321	0	0	0.836354	1.35058	4
6271	SLC5A11	incomplete-splice_match	3prime_fragment	FALSE	3	1	2	9	0	0	0	0	0	1	1	2	3	4	2	0.845309	0.191094	0.36793	2.05354	0	0	0	0	0	0.495093	0.437321	1.28788	1.03284	1.67271	0.900384	4
6279	ARHGAP17	full-splice_match	mono-exon	FALSE	30	57	39	6	31	20	12	13	29	1	25	19	49	51	3	8.45309	10.8924	7.17463	1.36902	22.1283	19.6161	19.5174	27.7605	16.0578	0.495093	10.933	12.2349	16.8697	21.327	1.35058	14
6297	ELP5	full-splice_match	reference_match	FALSE	3	2	3	79	0	8	8	0	6	43	0	19	54	22	0	0.845309	0.382188	0.551895	18.0255	0	7.84643	13.0116	0	3.3223	21.289	0	12.2349	18.5911	9.1999	0	8
6299	EIF5A	incomplete-splice_match	5prime_fragment	FALSE	11	2	12	6	1	1	3	0	2	5	5	10	8	6	0	3.09947	0.382188	2.20758	1.36902	0.713818	0.980804	4.87934	0	1.10743	2.47547	2.1866	6.43941	2.75423	2.50906	0	10
6300	EIF5A	full-splice_match	alternative_3end	FALSE	161	28	18	10	4	44	78	47	279	107	4	65	112	238	236	45.3649	5.35063	3.31137	2.28171	2.85527	43.1554	126.863	100.365	154.487	52.975	1.74928	41.8562	38.5593	99.5262	106.245	15
6306	GPS2	novel_in_catalog	combination_of_known_junctions,intron_retention	FALSE	2	2	3	18	3	0	0	1	0	0	0	34	111	0	0	0.563539	0.382188	0.551895	4.10707	2.14145	0	0	2.13542	0	0	0	21.894	38.215	0	0	5
6308	GPS2	full-splice_match	alternative_3end	FALSE	12	4	12	1	1	1	2	2	1	2	8	4	5	2	2	3.38124	0.764376	2.20758	0.228171	0.713818	0.980804	3.25289	4.27085	0.553717	0.990186	3.49857	2.57576	1.7214	0.836354	0.900384	7
6309	GPS2	incomplete-splice_match	intron_retention	FALSE	4	1	4	4	4	0	4	0	1	2	1	2	6	2	0	1.12708	0.191094	0.73586	0.912682	2.85527	0	6.50579	0	0.553717	0.990186	0.437321	1.28788	2.06567	0.836354	0	5
6310	GPS2	incomplete-splice_match	5prime_fragment	FALSE	31	21	29	10	10	10	4	3	0	2	10	0	9	7	7	8.73486	4.01298	5.33498	2.28171	7.13818	9.80804	6.50579	6.40627	0	0.990186	4.37321	0	3.09851	2.92724	3.15134	12
6311	GPS2	incomplete-splice_match	intron_retention	FALSE	13	12	11	17	14	8	9	0	5	8	21	9	20	7	0	3.66301	2.29313	2.02361	3.8789	9.99345	7.84643	14.638	0	2.76858	3.96075	9.18374	5.79547	6.88558	2.92724	0	13
6316	GPS2	full-splice_match	reference_match	FALSE	2	2	8	2	0	0	0	3	0	18	0	0	5	0	16	0.563539	0.382188	1.47172	0.456341	0	0	0	6.40627	0	8.91168	0	0	1.7214	0	7.20307	5
6322	ACAP1	incomplete-splice_match	3prime_fragment	FALSE	6	6	2	0	6	0	0	0	0	0	0	0	0	5	1	1.69062	1.14656	0.36793	0	4.28291	0	0	0	0	0	0	0	0	2.09089	0.450192	4
6327	KCTD11	full-splice_match	mono-exon	FALSE	5	16	11	37	4	4	1	1	11	9	9	8	19	10	8	1.40885	3.05751	2.02361	8.44231	2.85527	3.92321	1.62645	2.13542	6.09088	4.45584	3.93589	5.15153	6.5413	4.18177	3.60154	15
6328	MCRIP1	full-splice_match	reference_match	FALSE	142	17	210	5	1	1	0	2	4	6	3	2	4	9	5	40.0113	3.2486	38.6326	1.14085	0.713818	0.980804	0	4.27085	2.21487	2.97056	1.31196	1.28788	1.37712	3.76359	2.25096	12
6334	MCRIP1	full-splice_match	alternative_3end	FALSE	75	84	86	33	114	66	38	47	171	193	219	10	264	290	15	21.1327	16.0519	15.821	7.52963	81.3752	64.733	61.805	100.365	94.6855	95.553	95.7733	6.43941	90.8897	121.271	6.75288	15
6340	MIR23AHG	full-splice_match	mono-exon	FALSE	6	5	6	7	17	4	0	0	3	2	11	2	14	22	12	1.69062	0.95547	1.10379	1.59719	12.1349	3.92321	0	0	1.66115	0.990186	4.81053	1.28788	4.81991	9.1999	5.40231	11
6341	NANOS3	novel_in_catalog	combination_of_known_splicesites	FALSE	56	15	33	29	18	0	8	12	8	9	43	26	1	8	47	15.7791	2.86641	6.07084	6.61695	12.8487	0	13.0116	25.6251	4.42973	4.45584	18.8048	16.7425	0.344279	3.34542	21.159	13
6342	NANOS3	full-splice_match	alternative_3end	FALSE	2	1	4	1	1	15	0	1	0	2	3	1	1	6	4	0.563539	0.191094	0.73586	0.228171	0.713818	14.7121	0	2.13542	0	0.990186	1.31196	0.643941	0.344279	2.50906	1.80077	5
6349	RFX1	novel_not_in_catalog	novel_exon	FALSE	2	3	0	0	0	0	1	1	0	3	0	1	0	3	0	0.563539	0.573282	0	0	0	0	1.62645	2.13542	0	1.48528	0	0.643941	0	1.25453	0	4
6351	MISP3	full-splice_match	alternative_5end	FALSE	65	55	93	7	15	5	14	3	13	19	29	51	56	52	37	18.315	10.5102	17.1087	1.59719	10.7073	4.90402	22.7703	6.40627	7.19832	9.40677	12.6823	32.841	19.2796	21.7452	16.6571	15
6353	MISP3	incomplete-splice_match	intron_retention	FALSE	5	0	1	0	1	0	2	1	0	1	0	0	1	3	0	1.40885	0	0.183965	0	0.713818	0	3.25289	2.13542	0	0.495093	0	0	0.344279	1.25453	0	4
6354	MISP3	full-splice_match	mono-exon	FALSE	5	5	6	1	10	2	1	1	4	3	2	4	3	6	4	1.40885	0.95547	1.10379	0.228171	7.13818	1.96161	1.62645	2.13542	2.21487	1.48528	0.874642	2.57576	1.03284	2.50906	1.80077	12
6355	MISP3	full-splice_match	alternative_3end	FALSE	11	17	17	9	5	0	2	0	5	1	4	1	3	9	3	3.09947	3.2486	3.1274	2.05354	3.56909	0	3.25289	0	2.76858	0.495093	1.74928	0.643941	1.03284	3.76359	1.35058	11
6356	MISP3	incomplete-splice_match	intron_retention	FALSE	10	13	8	11	37	13	20	10	23	36	5	8	15	1	8	2.8177	2.48422	1.47172	2.50988	26.4113	12.7504	32.5289	21.3542	12.7355	17.8234	2.1866	5.15153	5.16419	0.418177	3.60154	14
6363	PRKACA	full-splice_match	mono-exon	FALSE	6	1	0	5	3	4	1	2	6	2	3	4	9	1	2	1.69062	0.191094	0	1.14085	2.14145	3.92321	1.62645	4.27085	3.3223	0.990186	1.31196	2.57576	3.09851	0.418177	0.900384	10
6367	SAMD1	incomplete-splice_match	5prime_fragment	FALSE	2	0	1	6	0	0	0	3	6	0	4	1	3	0	1	0.563539	0	0.183965	1.36902	0	0	0	6.40627	3.3223	0	1.74928	0.643941	1.03284	0	0.450192	5
6392	novelGene_ENSG00000288254_AS	antisense	multi-exon	FALSE	5	13	12	4	0	0	0	0	5	0	4	1	0	1	0	1.40885	2.48422	2.20758	0.912682	0	0	0	0	2.76858	0	1.74928	0.643941	0	0.418177	0	5
6404	novelGene_ENSG00000288444_AS	antisense	multi-exon	FALSE	6	2	6	2	2	0	0	0	1	2	0	2	5	0	0	1.69062	0.382188	1.10379	0.456341	1.42764	0	0	0	0.553717	0.990186	0	1.28788	1.7214	0	0	5
6407	ENSG00000288444	full-splice_match	mono-exon	FALSE	72	1616	2206	1221	47	33	18	27	1875	1048	59	47	1518	75	40	20.2874	308.808	405.827	278.596	33.5494	32.3665	29.2761	57.6565	1038.22	518.858	25.8019	30.2652	522.616	31.3633	18.0077	15
6409	ENSG00000288254	full-splice_match	mono-exon	FALSE	362	189	641	475	49	37	125	29	551	342	65	59	117	573	57	102.001	36.1168	117.922	108.381	34.9771	36.2897	203.306	61.9273	305.098	169.322	28.4259	37.9925	40.2807	239.616	25.6609	15
6448	C1GALT1C1	full-splice_match	alternative_3end	FALSE	53	67	84	56	3	8	1	0	25	14	16	7	14	24	12	14.9338	12.8033	15.4531	12.7776	2.14145	7.84643	1.62645	0	13.8429	6.9313	6.99713	4.50759	4.81991	10.0363	5.40231	14
6450	GLUD2	full-splice_match	mono-exon	FALSE	3	5	9	8	7	5	5	5	3	4	1	8	2	9	8	0.845309	0.95547	1.65568	1.82536	4.99672	4.90402	8.13224	10.6771	1.66115	1.98037	0.437321	5.15153	0.688558	3.76359	3.60154	11
6477	KCNT2	incomplete-splice_match	5prime_fragment	FALSE	8	2	1	0	2	0	0	0	0	5	0	4	3	0	0	2.25416	0.382188	0.183965	0	1.42764	0	0	0	0	2.47547	0	2.57576	1.03284	0	0	5
6480	KCNT2	incomplete-splice_match	5prime_fragment	FALSE	17	7	14	4	10	9	8	3	1	3	9	12	6	9	19	4.79008	1.33766	2.57551	0.912682	7.13818	8.82723	13.0116	6.40627	0.553717	1.48528	3.93589	7.72729	2.06567	3.76359	8.55365	13
6485	ENSG00000291376	full-splice_match	mono-exon	FALSE	2	12	7	10	3	1	1	3	5	6	0	8	8	1	0	0.563539	2.29313	1.28775	2.28171	2.14145	0.980804	1.62645	6.40627	2.76858	2.97056	0	5.15153	2.75423	0.418177	0	10
6486	NECAP2	full-splice_match	alternative_3end	FALSE	14	17	5	21	6	2	1	0	5	6	8	2	16	2	2	3.94478	3.2486	0.919825	4.79158	4.28291	1.96161	1.62645	0	2.76858	2.97056	3.49857	1.28788	5.50847	0.836354	0.900384	11
6489	NECAP2	full-splice_match	alternative_3end5end	FALSE	19	0	2	0	0	7	0	0	0	0	14	12	0	23	0	5.35362	0	0.36793	0	0	6.86563	0	0	0	0	6.12249	7.72729	0	9.61807	0	5
6491	ENSG00000291386	full-splice_match	mono-exon	FALSE	4	0	2	0	2	1	2	1	4	2	6	1	4	9	7	1.12708	0	0.36793	0	1.42764	0.980804	3.25289	2.13542	2.21487	0.990186	2.62392	0.643941	1.37712	3.76359	3.15134	9
6492	ENSG00000291408	full-splice_match	alternative_5end	FALSE	18	0	15	0	3	0	4	0	0	3	14	0	4	9	18	5.07185	0	2.75947	0	2.14145	0	6.50579	0	0	1.48528	6.12249	0	1.37712	3.76359	8.10346	9
6493	ENSG00000291408	full-splice_match	mono-exon	FALSE	9	1	2	2	4	1	0	0	4	1	4	4	10	3	11	2.53593	0.191094	0.36793	0.456341	2.85527	0.980804	0	0	2.21487	0.495093	1.74928	2.57576	3.44279	1.25453	4.95211	8
6494	ENSG00000291408	full-splice_match	alternative_5end	FALSE	18	13	16	6	11	3	0	3	18	0	14	8	5	15	16	5.07185	2.48422	2.94344	1.36902	7.85199	2.94241	0	6.40627	9.9669	0	6.12249	5.15153	1.7214	6.27266	7.20307	13
6496	ENSG00000292236	full-splice_match	mono-exon	FALSE	35	72	80	106	3	4	2	3	36	58	25	21	50	45	19	9.86194	13.7588	14.7172	24.1861	2.14145	3.92321	3.25289	6.40627	19.9338	28.7154	10.933	13.5228	17.214	18.818	8.55365	15
6500	EIF1AXP1	full-splice_match	mono-exon	FALSE	11	1	54	43	4	5	7	0	8	14	6	4	10	54	5	3.09947	0.191094	9.93411	9.81133	2.85527	4.90402	11.3851	0	4.42973	6.9313	2.62392	2.57576	3.44279	22.5816	2.25096	13
6501	ENSG00000292228	novel_not_in_catalog	partial_intron_retention	FALSE	4	0	3	0	1	0	1	2	2	3	0	3	0	4	5	1.12708	0	0.551895	0	0.713818	0	1.62645	4.27085	1.10743	1.48528	0	1.93182	0	1.67271	2.25096	8
6502	ENSG00000292228	incomplete-splice_match	5prime_fragment	FALSE	6	5	1	1	2	1	0	1	1	0	1	4	3	2	0	1.69062	0.95547	0.183965	0.228171	1.42764	0.980804	0	2.13542	0.553717	0	0.437321	2.57576	1.03284	0.836354	0	5
6508	NBPF1	incomplete-splice_match	5prime_fragment	FALSE	5	3	3	2	0	3	3	0	3	2	7	5	1	3	6	1.40885	0.573282	0.551895	0.456341	0	2.94241	4.87934	0	1.66115	0.990186	3.06125	3.21971	0.344279	1.25453	2.70115	8
6514	SZRD1	full-splice_match	alternative_3end	FALSE	2	13	27	2	2	2	0	1	0	4	0	0	0	1	0	0.563539	2.48422	4.96705	0.456341	1.42764	1.96161	0	2.13542	0	1.98037	0	0	0	0.418177	0	6
6525	ENSG00000292226	incomplete-splice_match	5prime_fragment	FALSE	3	1	0	0	2	1	0	1	0	0	2	0	3	1	3	0.845309	0.191094	0	0	1.42764	0.980804	0	2.13542	0	0	0.874642	0	1.03284	0.418177	1.35058	4
6535	ENSG00000292227	novel_not_in_catalog	partial_intron_retention	FALSE	4	1	5	2	0	3	1	4	3	1	1	5	7	1	3	1.12708	0.191094	0.919825	0.456341	0	2.94241	1.62645	8.5417	1.66115	0.495093	0.437321	3.21971	2.40995	0.418177	1.35058	8
6580	ENSG00000291889	full-splice_match	alternative_5end	FALSE	1	1	2	0	0	0	1	0	3	6	0	3	0	1	0	0.28177	0.191094	0.36793	0	0	0	1.62645	0	1.66115	2.97056	0	1.93182	0	0.418177	0	4
6581	ZNF496-DT	full-splice_match	mono-exon	FALSE	8	7	12	5	9	13	6	5	10	4	8	9	10	8	8	2.25416	1.33766	2.20758	1.14085	6.42436	12.7504	9.75868	10.6771	5.53717	1.98037	3.49857	5.79547	3.44279	3.34542	3.60154	15
6590	MEF2D	incomplete-splice_match	3prime_fragment	FALSE	5	3	0	10	0	4	0	1	0	5	1	1	5	0	0	1.40885	0.573282	0	2.28171	0	3.92321	0	2.13542	0	2.47547	0.437321	0.643941	1.7214	0	0	6
6599	HAPLN2	incomplete-splice_match	5prime_fragment	FALSE	30	58	72	55	18	12	0	4	29	2	7	16	13	12	8	8.45309	11.0835	13.2455	12.5494	12.8487	11.7696	0	8.5417	16.0578	0.990186	3.06125	10.3031	4.47563	5.01813	3.60154	13
6618	HAPLN2	full-splice_match	reference_match	FALSE	31	65	63	19	10	3	0	0	622	0	52	269	7	7	312	8.73486	12.4211	11.5898	4.33524	7.13818	2.94241	0	0	344.412	0	22.7407	173.22	2.40995	2.92724	140.46	12
6621	HAPLN2	novel_in_catalog	combination_of_known_junctions,intron_retention	FALSE	4	12	7	0	1	4	0	0	0	3	0	0	10	0	1	1.12708	2.29313	1.28775	0	0.713818	3.92321	0	0	0	1.48528	0	0	3.44279	0	0.450192	6
6624	HAPLN2	novel_not_in_catalog	Alt3	FALSE	1	16	12	1292	0	112	0	0	2	0	0	0	0	2	1	0.28177	3.05751	2.20758	294.796	0	109.85	0	0	1.10743	0	0	0	0	0.836354	0.450192	5
6627	HAPLN2	incomplete-splice_match	5prime_fragment	FALSE	24	25	25	28	8	3	0	0	23	3	3	13	8	13	9	6.76247	4.77735	4.59912	6.38878	5.71054	2.94241	0	0	12.7355	1.48528	1.31196	8.37123	2.75423	5.4363	4.05173	13
6629	HAPLN2	novel_in_catalog	combination_of_known_junctions	FALSE	5	33	26	8	2	2	1	0	3	223	0	1	0	2	1	1.40885	6.30611	4.78309	1.82536	1.42764	1.96161	1.62645	0	1.66115	110.406	0	0.643941	0	0.836354	0.450192	9
6639	HAPLN2	novel_in_catalog	combination_of_known_junctions,intron_retention	FALSE	2	7	5	0	5	2	25	0	1	1	0	0	0	0	0	0.563539	1.33766	0.919825	0	3.56909	1.96161	40.6612	0	0.553717	0.495093	0	0	0	0	0	4
6645	GPATCH4	full-splice_match	alternative_3end	FALSE	5	41	18	9	21	1	0	21	0	7	12	3	4	2	0	1.40885	7.83486	3.31137	2.05354	14.9902	0.980804	0	44.8439	0	3.46565	5.24785	1.93182	1.37712	0.836354	0	10
6646	GPATCH4	full-splice_match	alternative_3end	FALSE	17	4	6	0	0	0	2	0	1	2	0	0	0	2	30	4.79008	0.764376	1.10379	0	0	0	3.25289	0	0.553717	0.990186	0	0	0	0.836354	13.5058	4
6653	ENSG00000291755	novel_not_in_catalog	UTR_UTR	TRUE	1	0	4	0	1	0	1	0	2	4	0	4	2	4	1	0.28177	0	0.73586	0	0.713818	0	1.62645	0	1.10743	1.98037	0	2.57576	0.688558	1.67271	0.450192	5
6656	ENSG00000291758	full-splice_match	mono-exon	FALSE	25	4	13	8	10	30	3	25	7	12	16	20	14	8	20	7.04424	0.764376	2.39154	1.82536	7.13818	29.4241	4.87934	53.3856	3.87602	5.94112	6.99713	12.8788	4.81991	3.34542	9.00384	14
6660	novelGene_FABP7P2_AS	antisense	multi-exon	FALSE	5	0	5	8	0	1	0	0	2	0	0	6	4	0	0	1.40885	0	0.919825	1.82536	0	0.980804	0	0	1.10743	0	0	3.86365	1.37712	0	0	5
6680	FAHD2A	full-splice_match	alternative_3end	FALSE	12	50	46	56	28	0	0	0	31	2	41	0	0	16	0	3.38124	9.5547	8.46239	12.7776	19.9869	0	0	0	17.1652	0.990186	17.9302	0	0	6.69083	0	8
6682	LINC03052	full-splice_match	mono-exon	FALSE	4	6	6	8	4	1	0	0	8	4	6	3	6	2	6	1.12708	1.14656	1.10379	1.82536	2.85527	0.980804	0	0	4.42973	1.98037	2.62392	1.93182	2.06567	0.836354	2.70115	11
6687	DYNC1I2	incomplete-splice_match	5prime_fragment	FALSE	7	8	10	6	0	0	0	0	2	0	0	0	0	3	0	1.97239	1.52875	1.83965	1.36902	0	0	0	0	1.10743	0	0	0	0	1.25453	0	6
6688	DYNC1I2	incomplete-splice_match	5prime_fragment	FALSE	2	13	8	5	2	1	0	0	0	0	0	0	2	0	1	0.563539	2.48422	1.47172	1.14085	1.42764	0.980804	0	0	0	0	0	0	0.688558	0	0.450192	4
6692	DYNC1I2	incomplete-splice_match	3prime_fragment	FALSE	2	0	0	0	0	0	41	4	13	155	92	0	21	19	0	0.563539	0	0	0	0	0	66.6843	8.5417	7.19832	76.7394	40.2335	0	7.22986	7.94537	0	7
6699	DYNC1I2	full-splice_match	alternative_3end	FALSE	30	100	96	0	2	2	1	0	21	21	20	7	39	6	78	8.45309	19.1094	17.6606	0	1.42764	1.96161	1.62645	0	11.628	10.397	8.74642	4.50759	13.4269	2.50906	35.115	13
6701	DYNC1I2	incomplete-splice_match	5prime_fragment	FALSE	39	68	97	23	0	1	0	0	9	5	2	7	1	3	0	10.989	12.9944	17.8446	5.24792	0	0.980804	0	0	4.98345	2.47547	0.874642	4.50759	0.344279	1.25453	0	8
6702	DYNC1I2	incomplete-splice_match	5prime_fragment	FALSE	4	7	6	5	0	0	0	0	0	0	0	0	2	0	0	1.12708	1.33766	1.10379	1.14085	0	0	0	0	0	0	0	0	0.688558	0	0	4
6704	DYNC1I2	incomplete-splice_match	5prime_fragment	FALSE	9	8	17	3	0	0	0	0	1	0	0	2	1	0	0	2.53593	1.52875	3.1274	0.684512	0	0	0	0	0.553717	0	0	1.28788	0.344279	0	0	4
6705	DYNC1I2	full-splice_match	reference_match	FALSE	14	37	27	25	0	1	0	0	2	0	1	0	0	6	0	3.94478	7.07048	4.96705	5.70426	0	0.980804	0	0	1.10743	0	0.437321	0	0	2.50906	0	6
6708	DYNC1I2	incomplete-splice_match	5prime_fragment	FALSE	2	116	11	0	1	7	1	3	51	11	4	4	8	35	34	0.563539	22.1669	2.02361	0	0.713818	6.86563	1.62645	6.40627	28.2395	5.44602	1.74928	2.57576	2.75423	14.6362	15.3065	12
6710	DYNC1I2	incomplete-splice_match	5prime_fragment	FALSE	4	7	6	1	1	1	0	0	2	0	0	1	0	2	0	1.12708	1.33766	1.10379	0.228171	0.713818	0.980804	0	0	1.10743	0	0	0.643941	0	0.836354	0	4
6714	DYNC1I2	incomplete-splice_match	5prime_fragment	FALSE	10	39	12	15	0	0	0	0	6	0	1	5	3	1	1	2.8177	7.45267	2.20758	3.42256	0	0	0	0	3.3223	0	0.437321	3.21971	1.03284	0.418177	0.450192	7
6716	DYNC1I2	incomplete-splice_match	5prime_fragment	FALSE	4	6	14	0	0	0	2	0	0	3	0	1	1	3	0	1.12708	1.14656	2.57551	0	0	0	3.25289	0	0	1.48528	0	0.643941	0.344279	1.25453	0	6
6718	DYNC1I2	incomplete-splice_match	5prime_fragment	FALSE	19	44	55	40	1	1	2	0	3	0	2	0	6	3	1	5.35362	8.40814	10.1181	9.12682	0.713818	0.980804	3.25289	0	1.66115	0	0.874642	0	2.06567	1.25453	0.450192	8
6720	HAT1	full-splice_match	reference_match	FALSE	11	103	82	76	0	1	0	0	22	23	1	7	0	23	22	3.09947	19.6827	15.0851	17.341	0	0.980804	0	0	12.1818	11.3871	0.437321	4.50759	0	9.61807	9.90423	9
6723	HAT1	full-splice_match	alternative_3end	FALSE	3	8	9	3	1	1	0	2	1	2	3	1	2	4	4	0.845309	1.52875	1.65568	0.684512	0.713818	0.980804	0	4.27085	0.553717	0.990186	1.31196	0.643941	0.688558	1.67271	1.80077	6
6724	HAT1	incomplete-splice_match	5prime_fragment	FALSE	4	8	19	1	3	4	0	1	0	4	6	2	5	10	7	1.12708	1.52875	3.49533	0.228171	2.14145	3.92321	0	2.13542	0	1.98037	2.62392	1.28788	1.7214	4.18177	3.15134	12
6733	METAP1D	full-splice_match	reference_match	FALSE	8	10	11	0	0	2	0	1	12	2	2	1	2	2	11	2.25416	1.91094	2.02361	0	0	1.96161	0	2.13542	6.6446	0.990186	0.874642	0.643941	0.688558	0.836354	4.95211	7
6734	METAP1D	full-splice_match	alternative_3end	FALSE	13	6	12	4	1	6	1	0	10	9	9	11	7	9	20	3.66301	1.14656	2.20758	0.912682	0.713818	5.88482	1.62645	0	5.53717	4.45584	3.93589	7.08335	2.40995	3.76359	9.00384	12
6741	SLC25A12	novel_not_in_catalog	novel_exon	FALSE	5	9	0	2	7	0	0	0	0	0	5	0	0	3	0	1.40885	1.71985	0	0.456341	4.99672	0	0	0	0	0	2.1866	0	0	1.25453	0	5
6744	SLC25A12	incomplete-splice_match	5prime_fragment	FALSE	58	43	103	5	24	13	5	13	34	26	31	43	37	51	99	16.3426	8.21705	18.9484	1.14085	17.1316	12.7504	8.13224	27.7605	18.8264	12.8724	13.5569	27.6895	12.7383	21.327	44.569	15
6745	SLC25A12	incomplete-splice_match	5prime_fragment	FALSE	2	1	4	0	1	2	0	2	0	3	0	3	0	3	2	0.563539	0.191094	0.73586	0	0.713818	1.96161	0	4.27085	0	1.48528	0	1.93182	0	1.25453	0.900384	5
6746	SLC25A12	full-splice_match	alternative_3end5end	FALSE	18	75	0	67	1	0	1	0	0	0	1	0	5	1	10	5.07185	14.3321	0	15.2874	0.713818	0	1.62645	0	0	0	0.437321	0	1.7214	0.418177	4.50192	6
6747	SLC25A12	incomplete-splice_match	3prime_fragment	FALSE	22	0	1	0	0	0	1	0	33	2	90	28	10	1	0	6.19893	0	0.183965	0	0	0	1.62645	0	18.2726	0.990186	39.3589	18.0304	3.44279	0.418177	0	6
6748	SLC25A12	incomplete-splice_match	5prime_fragment	FALSE	2	0	0	0	0	0	0	1	1	0	3	2	0	1	3	0.563539	0	0	0	0	0	0	2.13542	0.553717	0	1.31196	1.28788	0	0.418177	1.35058	4
6749	SLC25A12	incomplete-splice_match	5prime_fragment	FALSE	3	4	9	0	2	5	1	3	5	4	6	7	16	27	12	0.845309	0.764376	1.65568	0	1.42764	4.90402	1.62645	6.40627	2.76858	1.98037	2.62392	4.50759	5.50847	11.2908	5.40231	12
6750	SLC25A12	incomplete-splice_match	3prime_fragment	FALSE	1	1	0	0	2	0	0	10	39	90	9	31	74	31	0	0.28177	0.191094	0	0	1.42764	0	0	21.3542	21.5949	44.5584	3.93589	19.9622	25.4767	12.9635	0	8
6751	SLC25A12	incomplete-splice_match	5prime_fragment	FALSE	22	0	4	0	0	3	1	0	2	0	2	4	1	1	17	6.19893	0	0.73586	0	0	2.94241	1.62645	0	1.10743	0	0.874642	2.57576	0.344279	0.418177	7.65327	6
6755	ENSG00000292104	full-splice_match	mono-exon	FALSE	2	2	0	2	5	3	1	4	2	4	6	3	5	2	4	0.563539	0.382188	0	0.456341	3.56909	2.94241	1.62645	8.5417	1.10743	1.98037	2.62392	1.93182	1.7214	0.836354	1.80077	10
6758	SLC25A12	incomplete-splice_match	5prime_fragment	FALSE	1	5	5	1	2	0	0	0	3	3	1	0	1	1	3	0.28177	0.95547	0.919825	0.228171	1.42764	0	0	0	1.66115	1.48528	0.437321	0	0.344279	0.418177	1.35058	4
6764	PLAC9P1	novel_not_in_catalog	novel_exon	FALSE	13	15	11	0	0	0	0	0	5	0	0	4	0	0	6	3.66301	2.86641	2.02361	0	0	0	0	0	2.76858	0	0	2.57576	0	0	2.70115	6
6766	PLAC9P1	full-splice_match	mono-exon	FALSE	19	26	19	2	5	21	0	0	9	1	1	16	0	0	8	5.35362	4.96845	3.49533	0.456341	3.56909	20.5969	0	0	4.98345	0.495093	0.437321	10.3031	0	0	3.60154	8
6767	PLAC9P1	full-splice_match	alternative_5end	FALSE	173	103	61	16	1	0	0	0	32	3	0	14	0	6	11	48.7462	19.6827	11.2219	3.65073	0.713818	0	0	0	17.7189	1.48528	0	9.01518	0	2.50906	4.95211	9
6772	RAB6C	full-splice_match	mono-exon	FALSE	14	26	12	26	6	5	1	3	8	4	9	5	7	9	9	3.94478	4.96845	2.20758	5.93244	4.28291	4.90402	1.62645	6.40627	4.42973	1.98037	3.93589	3.21971	2.40995	3.76359	4.05173	15
6776	RAB6C-AS1	incomplete-splice_match	5prime_fragment	FALSE	22	10	0	7	0	0	0	0	4	1	2	5	1	6	2	6.19893	1.91094	0	1.59719	0	0	0	0	2.21487	0.495093	0.874642	3.21971	0.344279	2.50906	0.900384	6
6777	RAB6C-AS1	full-splice_match	mono-exon	FALSE	2	17	11	9	3	1	1	0	4	3	2	2	4	3	2	0.563539	3.2486	2.02361	2.05354	2.14145	0.980804	1.62645	0	2.21487	1.48528	0.874642	1.28788	1.37712	1.25453	0.900384	10
6778	CCDC74B	full-splice_match	alternative_5end	FALSE	2	0	0	0	0	7	3	0	0	1	0	3	5	0	0	0.563539	0	0	0	0	6.86563	4.87934	0	0	0.495093	0	1.93182	1.7214	0	0	4
6780	MZT2B	full-splice_match	alternative_5end	FALSE	124	95	144	171	34	31	0	9	16	93	116	72	84	110	104	34.9394	18.1539	26.4909	39.0172	24.2698	30.4049	0	19.2188	8.85947	46.0437	50.7292	46.3638	28.9194	45.9995	46.82	14
6786	MZT2B	full-splice_match	alternative_5end	FALSE	44	25	47	17	6	2	0	1	10	9	15	10	12	24	16	12.3979	4.77735	8.64635	3.8789	4.28291	1.96161	0	2.13542	5.53717	4.45584	6.55981	6.43941	4.13135	10.0363	7.20307	14
6788	MZT2B	full-splice_match	alternative_5end	FALSE	28	19	33	13	7	0	2	0	4	8	7	6	16	15	6	7.88955	3.63079	6.07084	2.96622	4.99672	0	3.25289	0	2.21487	3.96075	3.06125	3.86365	5.50847	6.27266	2.70115	13
6791	MZT2B	full-splice_match	alternative_5end	FALSE	497	492	672	215	56	22	27	27	130	111	119	80	173	167	107	140.04	94.0183	123.624	49.0567	39.9738	21.5777	43.9141	57.6565	71.9832	54.9553	52.0412	51.5153	59.5603	69.8356	48.1706	15
6797	MZT2B	full-splice_match	alternative_5end	FALSE	25	13	31	6	10	1	2	0	8	8	15	5	11	13	10	7.04424	2.48422	5.70291	1.36902	7.13818	0.980804	3.25289	0	4.42973	3.96075	6.55981	3.21971	3.78707	5.4363	4.50192	13
6799	MZT2B	full-splice_match	alternative_5end	FALSE	40	9	21	18	1	1	18	0	87	0	2	6	7	4	3	11.2708	1.71985	3.86326	4.10707	0.713818	0.980804	29.2761	0	48.1733	0	0.874642	3.86365	2.40995	1.67271	1.35058	10
6801	MZT2B	novel_in_catalog	combination_of_known_splicesites	FALSE	4	10	6	5	0	1	0	0	2	3	1	1	72	5	0	1.12708	1.91094	1.10379	1.14085	0	0.980804	0	0	1.10743	1.48528	0.437321	0.643941	24.7881	2.09089	0	8
6802	MZT2B	novel_in_catalog	combination_of_known_junctions	FALSE	3	49	11	0	0	0	0	0	7	4	0	1	13	2	0	0.845309	9.36361	2.02361	0	0	0	0	0	3.87602	1.98037	0	0.643941	4.47563	0.836354	0	5
6809	TGOLN2	incomplete-splice_match	3prime_fragment	FALSE	1	17	0	0	0	3	0	5	0	0	0	1	0	12	19	0.28177	3.2486	0	0	0	2.94241	0	10.6771	0	0	0	0.643941	0	5.01813	8.55365	5
6810	TGOLN2	full-splice_match	alternative_3end	FALSE	3	14	0	0	5	0	0	1	1	0	3	0	0	3	0	0.845309	2.67532	0	0	3.56909	0	0	2.13542	0.553717	0	1.31196	0	0	1.25453	0	5
6811	TGOLN2	incomplete-splice_match	5prime_fragment	FALSE	76	128	43	66	42	17	19	8	24	20	33	42	23	44	26	21.4145	24.46	7.91049	15.0593	29.9803	16.6737	30.9025	17.0834	13.2892	9.90186	14.4316	27.0455	7.91842	18.3998	11.705	15
6825	FAHD2B	full-splice_match	reference_match	FALSE	42	14	60	43	0	0	0	1	1	0	0	0	11	24	27	11.8343	2.67532	11.0379	9.81133	0	0	0	2.13542	0.553717	0	0	0	3.78707	10.0363	12.1552	8
6826	FAHD2B	full-splice_match	reference_match	FALSE	12	19	25	8	1	0	0	0	0	0	0	26	0	1	0	3.38124	3.63079	4.59912	1.82536	0.713818	0	0	0	0	0	0	16.7425	0	0.418177	0	5
6843	ANKRD36	full-splice_match	alternative_3end5end	FALSE	14	0	16	0	6	1	4	0	0	2	6	1	9	11	16	3.94478	0	2.94344	0	4.28291	0.980804	6.50579	0	0	0.990186	2.62392	0.643941	3.09851	4.59995	7.20307	8
6855	ANKRD36	incomplete-splice_match	5prime_fragment	FALSE	3	6	3	9	0	1	5	2	18	5	4	1	10	8	7	0.845309	1.14656	0.551895	2.05354	0	0.980804	8.13224	4.27085	9.9669	2.47547	1.74928	0.643941	3.44279	3.34542	3.15134	10
6863	ANKRD36	incomplete-splice_match	5prime_fragment	FALSE	2	1	32	6	0	1	0	0	10	0	2	2	3	2	65	0.563539	0.191094	5.88688	1.36902	0	0.980804	0	0	5.53717	0	0.874642	1.28788	1.03284	0.836354	29.2625	6
6871	ANKRD36B	incomplete-splice_match	5prime_fragment	FALSE	14	2	4	7	0	0	4	0	6	39	0	1	3	4	4	3.94478	0.382188	0.73586	1.59719	0	0	6.50579	0	3.3223	19.3086	0	0.643941	1.03284	1.67271	1.80077	8
6875	ENSG00000291593	full-splice_match	mono-exon	FALSE	1	1	2	22	6	1	2	1	2	15	7	2	1	1	10	0.28177	0.191094	0.36793	5.01975	4.28291	0.980804	3.25289	2.13542	1.10743	7.4264	3.06125	1.28788	0.344279	0.418177	4.50192	9
6884	ANKRD36B	incomplete-splice_match	3prime_fragment	FALSE	1	9	6	9	0	1	0	0	4	9	3	0	4	0	3	0.28177	1.71985	1.10379	2.05354	0	0.980804	0	0	2.21487	4.45584	1.31196	0	1.37712	0	1.35058	8
6887	ANKRD36B	incomplete-splice_match	internal_fragment	FALSE	26	29	2	9	0	0	0	0	1	2	0	0	1	8	37	7.32601	5.54173	0.36793	2.05354	0	0	0	0	0.553717	0.990186	0	0	0.344279	3.34542	16.6571	5
6897	ANKRD36B	incomplete-splice_match	5prime_fragment	FALSE	6	4	6	0	0	1	0	2	0	0	0	0	4	0	1	1.69062	0.764376	1.10379	0	0	0.980804	0	4.27085	0	0	0	0	1.37712	0	0.450192	4
6899	ANKRD36B	incomplete-splice_match	5prime_fragment	FALSE	2	4	42	11	2	3	4	3	2	4	1	3	3	1	14	0.563539	0.764376	7.72653	2.50988	1.42764	2.94241	6.50579	6.40627	1.10743	1.98037	0.437321	1.93182	1.03284	0.418177	6.30269	11
6906	COX5B	incomplete-splice_match	5prime_fragment	FALSE	14	3	21	6	9	1	1	1	1	1	2	5	13	3	10	3.94478	0.573282	3.86326	1.36902	6.42436	0.980804	1.62645	2.13542	0.553717	0.495093	0.874642	3.21971	4.47563	1.25453	4.50192	10
6911	COX5B	novel_in_catalog	combination_of_known_junctions,intron_retention	FALSE	3	1	5	0	3	2	0	0	0	5	0	0	0	4	98	0.845309	0.191094	0.919825	0	2.14145	1.96161	0	0	0	2.47547	0	0	0	1.67271	44.1188	5
6912	COX5B	full-splice_match	alternative_3end5end	FALSE	1795	1559	2475	950	136	75	68	19	567	325	440	252	585	69	194	505.777	297.916	455.313	216.762	97.0792	73.5603	110.598	40.5731	313.957	160.905	192.421	162.273	201.403	28.8542	87.3373	15
6925	ACTR1B	full-splice_match	alternative_5end	FALSE	4	194	183	0	0	0	0	0	116	0	1	0	1	79	0	1.12708	37.0723	33.6656	0	0	0	0	0	64.2311	0	0.437321	0	0.344279	33.036	0	5
6930	TMEM131	full-splice_match	alternative_5end	FALSE	31	1	0	0	0	0	0	7	0	0	2	31	0	3	55	8.73486	0.191094	0	0	0	0	0	14.948	0	0	0.874642	19.9622	0	1.25453	24.7606	5
6932	TMEM131	incomplete-splice_match	5prime_fragment	FALSE	7	5	6	2	6	3	1	0	0	2	2	0	4	0	2	1.97239	0.95547	1.10379	0.456341	4.28291	2.94241	1.62645	0	0	0.990186	0.874642	0	1.37712	0	0.900384	6
6937	TMEM131	incomplete-splice_match	5prime_fragment	FALSE	5	2	2	0	4	2	0	2	1	2	4	4	0	0	0	1.40885	0.382188	0.36793	0	2.85527	1.96161	0	4.27085	0.553717	0.990186	1.74928	2.57576	0	0	0	6
6949	TMEM131	incomplete-splice_match	5prime_fragment	FALSE	5	4	7	2	0	0	0	1	0	1	2	3	0	1	0	1.40885	0.764376	1.28775	0.456341	0	0	0	2.13542	0	0.495093	0.874642	1.93182	0	0.418177	0	4
6964	TPRKB	full-splice_match	alternative_5end	FALSE	24	24	50	10	3	2	0	0	1	0	0	6	0	0	0	6.76247	4.58626	9.19825	2.28171	2.14145	1.96161	0	0	0.553717	0	0	3.86365	0	0	0	7
6971	DUSP11	full-splice_match	alternative_3end	FALSE	1	4	6	3	1	2	1	1	0	2	5	6	4	0	0	0.28177	0.764376	1.10379	0.684512	0.713818	1.96161	1.62645	2.13542	0	0.990186	2.1866	3.86365	1.37712	0	0	7
6972	DUSP11	incomplete-splice_match	5prime_fragment	FALSE	4	8	4	4	3	1	2	2	2	4	6	8	3	3	6	1.12708	1.52875	0.73586	0.912682	2.14145	0.980804	3.25289	4.27085	1.10743	1.98037	2.62392	5.15153	1.03284	1.25453	2.70115	12
6977	RTP4	full-splice_match	alternative_3end	FALSE	4	14	11	0	2	0	0	0	2	0	0	0	0	2	0	1.12708	2.67532	2.02361	0	1.42764	0	0	0	1.10743	0	0	0	0	0.836354	0	5
6978	CNOT10	incomplete-splice_match	5prime_fragment	FALSE	4	7	7	1	2	3	1	1	2	0	2	1	4	1	7	1.12708	1.33766	1.28775	0.228171	1.42764	2.94241	1.62645	2.13542	1.10743	0	0.874642	0.643941	1.37712	0.418177	3.15134	10
6979	CNOT10	incomplete-splice_match	5prime_fragment	FALSE	6	5	10	0	2	0	0	0	1	5	1	0	5	2	6	1.69062	0.95547	1.83965	0	1.42764	0	0	0	0.553717	2.47547	0.437321	0	1.7214	0.836354	2.70115	6
6981	CNOT10	incomplete-splice_match	5prime_fragment	FALSE	1	1	2	0	3	2	0	0	1	1	3	3	1	0	1	0.28177	0.191094	0.36793	0	2.14145	1.96161	0	0	0.553717	0.495093	1.31196	1.93182	0.344279	0	0.450192	4
6982	SUGT1P2	full-splice_match	mono-exon	FALSE	3	5	6	5	1	1	0	2	0	10	3	0	1	1	6	0.845309	0.95547	1.10379	1.14085	0.713818	0.980804	0	4.27085	0	4.95093	1.31196	0	0.344279	0.418177	2.70115	6
6983	CNOT10	incomplete-splice_match	3prime_fragment	FALSE	7	16	0	0	2	0	0	0	20	0	0	0	0	0	0	1.97239	3.05751	0	0	1.42764	0	0	0	11.0743	0	0	0	0	0	0	4
6984	CNOT10	incomplete-splice_match	3prime_fragment	FALSE	4	0	12	10	0	0	0	0	0	10	0	0	0	0	0	1.12708	0	2.20758	2.28171	0	0	0	0	0	4.95093	0	0	0	0	0	4
6985	CNOT10	full-splice_match	alternative_3end5end	FALSE	2	1	3	1	1	3	4	0	0	4	2	4	1	1	4	0.563539	0.191094	0.551895	0.228171	0.713818	2.94241	6.50579	0	0	1.98037	0.874642	2.57576	0.344279	0.418177	1.80077	5
6998	ITGA9-AS1	full-splice_match	reference_match	FALSE	9	4	6	9	2	11	3	1	7	6	2	6	0	0	4	2.53593	0.764376	1.10379	2.05354	1.42764	10.7888	4.87934	2.13542	3.87602	2.97056	0.874642	3.86365	0	0	1.80077	11
7003	ITGA9-AS1	full-splice_match	reference_match	FALSE	5	2	7	3	4	3	1	2	5	1	6	3	6	2	5	1.40885	0.382188	1.28775	0.684512	2.85527	2.94241	1.62645	4.27085	2.76858	0.495093	2.62392	1.93182	2.06567	0.836354	2.25096	11
7008	RPS3A	full-splice_match	alternative_5end	FALSE	846	1383	1502	542	75	83	47	46	241	218	241	197	377	358	225	238.377	264.283	276.315	123.668	53.5363	81.4067	76.443	98.2295	133.446	107.93	105.394	126.856	129.793	149.707	101.293	15
7009	RPS3A	incomplete-splice_match	5prime_fragment	FALSE	15	10	26	5	2	4	1	2	12	5	5	13	6	8	13	4.22655	1.91094	4.78309	1.14085	1.42764	3.92321	1.62645	4.27085	6.6446	2.47547	2.1866	8.37123	2.06567	3.34542	5.8525	15
7010	RPS3A	incomplete-splice_match	5prime_fragment	FALSE	16	15	25	12	4	2	4	3	7	1	11	8	12	8	7	4.50831	2.86641	4.59912	2.73805	2.85527	1.96161	6.50579	6.40627	3.87602	0.495093	4.81053	5.15153	4.13135	3.34542	3.15134	14
7013	RPS3A	incomplete-splice_match	5prime_fragment	FALSE	18	15	19	14	8	6	0	4	5	4	16	16	10	7	12	5.07185	2.86641	3.49533	3.19439	5.71054	5.88482	0	8.5417	2.76858	1.98037	6.99713	10.3031	3.44279	2.92724	5.40231	14
7022	RPS3A	incomplete-splice_match	5prime_fragment	FALSE	20	29	28	22	5	4	2	3	11	5	20	11	6	7	16	5.63539	5.54173	5.15102	5.01975	3.56909	3.92321	3.25289	6.40627	6.09088	2.47547	8.74642	7.08335	2.06567	2.92724	7.20307	15
7023	RPS3A	full-splice_match	reference_match	FALSE	47	41	34	21	1	2	0	3	12	2	3	4	3	10	3	13.2432	7.83486	6.25481	4.79158	0.713818	1.96161	0	6.40627	6.6446	0.990186	1.31196	2.57576	1.03284	4.18177	1.35058	12
7026	ENSG00000292159	full-splice_match	mono-exon	FALSE	1	5	5	8	0	0	0	0	2	3	3	1	1	1	3	0.28177	0.95547	0.919825	1.82536	0	0	0	0	1.10743	1.48528	1.31196	0.643941	0.344279	0.418177	1.35058	5
7039	SH3D19	incomplete-splice_match	5prime_fragment	FALSE	23	17	5	5	2	2	0	0	9	0	3	1	4	10	12	6.4807	3.2486	0.919825	1.14085	1.42764	1.96161	0	0	4.98345	0	1.31196	0.643941	1.37712	4.18177	5.40231	10
7049	MED10	full-splice_match	alternative_5end	FALSE	108	117	179	128	42	16	3	14	62	90	75	39	91	38	70	30.4311	22.358	32.9297	29.2058	29.9803	15.6929	4.87934	29.8959	34.3304	44.5584	32.7991	25.1137	31.3294	15.8907	31.5134	15
7050	MED10	incomplete-splice_match	5prime_fragment	FALSE	12	9	11	5	5	3	1	1	1	7	9	7	5	5	5	3.38124	1.71985	2.02361	1.14085	3.56909	2.94241	1.62645	2.13542	0.553717	3.46565	3.93589	4.50759	1.7214	2.09089	2.25096	14
7051	MED10	full-splice_match	alternative_3end	FALSE	28	108	86	61	1	38	1	24	1	10	2	56	1	0	40	7.88955	20.6382	15.821	13.9184	0.713818	37.2705	1.62645	51.2502	0.553717	4.95093	0.874642	36.0607	0.344279	0	18.0077	10
7052	UBE2QL1	full-splice_match	alternative_3end	FALSE	90	2	180	273	49	0	1	1	3	206	69	4	290	140	2	25.3593	0.382188	33.1137	62.2906	34.9771	0	1.62645	2.13542	1.66115	101.989	30.1751	2.57576	99.8409	58.5448	0.900384	12
7056	PCDHA3	full-splice_match	mono-exon	FALSE	1	3	0	1	0	1	0	0	4	1	2	3	3	1	4	0.28177	0.573282	0	0.228171	0	0.980804	0	0	2.21487	0.495093	0.874642	1.93182	1.03284	0.418177	1.80077	4
7057	PCDHA5	full-splice_match	mono-exon	FALSE	5	2	2	6	3	3	1	2	4	5	6	5	17	6	8	1.40885	0.382188	0.36793	1.36902	2.14145	2.94241	1.62645	4.27085	2.21487	2.47547	2.62392	3.21971	5.85274	2.50906	3.60154	13
7058	PCDHAC2	full-splice_match	mono-exon	FALSE	4	4	1	2	1	0	0	0	2	0	5	3	8	1	0	1.12708	0.764376	0.183965	0.456341	0.713818	0	0	0	1.10743	0	2.1866	1.93182	2.75423	0.418177	0	5
7060	PCDHA6	full-splice_match	mono-exon	FALSE	4	5	1	0	3	1	1	1	2	1	5	3	5	0	6	1.12708	0.95547	0.183965	0	2.14145	0.980804	1.62645	2.13542	1.10743	0.495093	2.1866	1.93182	1.7214	0	2.70115	9
7061	PCDHA4	full-splice_match	mono-exon	FALSE	1	4	2	9	5	2	2	1	4	4	8	2	8	4	10	0.28177	0.764376	0.36793	2.05354	3.56909	1.96161	3.25289	2.13542	2.21487	1.98037	3.49857	1.28788	2.75423	1.67271	4.50192	12
7062	PCDHA7	full-splice_match	mono-exon	FALSE	1	8	5	4	2	0	1	0	2	2	3	4	1	5	5	0.28177	1.52875	0.919825	0.912682	1.42764	0	1.62645	0	1.10743	0.990186	1.31196	2.57576	0.344279	2.09089	2.25096	8
7064	PCDHA9	full-splice_match	mono-exon	FALSE	2	14	1	3	3	1	3	3	4	12	11	4	6	8	16	0.563539	2.67532	0.183965	0.684512	2.14145	0.980804	4.87934	6.40627	2.21487	5.94112	4.81053	2.57576	2.06567	3.34542	7.20307	11
7065	PCDHA10	full-splice_match	mono-exon	FALSE	14	17	14	24	3	4	0	0	5	12	6	6	17	13	22	3.94478	3.2486	2.57551	5.47609	2.14145	3.92321	0	0	2.76858	5.94112	2.62392	3.86365	5.85274	5.4363	9.90423	13
7068	PCDHAC1	full-splice_match	mono-exon	FALSE	4	0	0	4	3	1	1	1	1	2	2	4	3	0	6	1.12708	0	0	0.912682	2.14145	0.980804	1.62645	2.13542	0.553717	0.990186	0.874642	2.57576	1.03284	0	2.70115	7
7071	PCDHB2	full-splice_match	mono-exon	FALSE	19	14	31	16	20	12	6	5	11	18	15	10	20	9	22	5.35362	2.67532	5.70291	3.65073	14.2764	11.7696	9.75868	10.6771	6.09088	8.91168	6.55981	6.43941	6.88558	3.76359	9.90423	15
7072	PCDHB3	full-splice_match	mono-exon	FALSE	10	13	11	5	9	7	7	6	5	3	8	6	5	9	14	2.8177	2.48422	2.02361	1.14085	6.42436	6.86563	11.3851	12.8125	2.76858	1.48528	3.49857	3.86365	1.7214	3.76359	6.30269	15
7073	ENSG00000291675	full-splice_match	mono-exon	FALSE	4	12	7	5	2	2	1	0	3	5	4	3	4	4	10	1.12708	2.29313	1.28775	1.14085	1.42764	1.96161	1.62645	0	1.66115	2.47547	1.74928	1.93182	1.37712	1.67271	4.50192	14
7074	PCDHB4	full-splice_match	mono-exon	FALSE	19	51	30	31	6	3	3	4	17	18	3	7	38	31	24	5.35362	9.7458	5.51895	7.07329	4.28291	2.94241	4.87934	8.5417	9.41318	8.91168	1.31196	4.50759	13.0826	12.9635	10.8046	15
7075	PCDHB5	full-splice_match	mono-exon	FALSE	4	9	23	16	8	4	1	4	7	7	7	7	18	1	23	1.12708	1.71985	4.23119	3.65073	5.71054	3.92321	1.62645	8.5417	3.87602	3.46565	3.06125	4.50759	6.19702	0.418177	10.3544	14
7077	PCDHB6	full-splice_match	mono-exon	FALSE	6	14	14	13	6	1	2	1	5	7	3	9	19	7	8	1.69062	2.67532	2.57551	2.96622	4.28291	0.980804	3.25289	2.13542	2.76858	3.46565	1.31196	5.79547	6.5413	2.92724	3.60154	14
7079	ENSG00000291680	full-splice_match	mono-exon	FALSE	1	1	2	3	2	3	1	0	0	2	0	4	1	0	2	0.28177	0.191094	0.36793	0.684512	1.42764	2.94241	1.62645	0	0	0.990186	0	2.57576	0.344279	0	0.900384	4
7080	PCDHB7	full-splice_match	mono-exon	FALSE	6	30	12	17	2	4	0	1	5	5	10	6	17	5	19	1.69062	5.73282	2.20758	3.8789	1.42764	3.92321	0	2.13542	2.76858	2.47547	4.37321	3.86365	5.85274	2.09089	8.55365	14
7081	PCDHB16	full-splice_match	mono-exon	FALSE	21	35	29	17	4	0	4	3	8	16	4	9	14	16	12	5.91716	6.68829	5.33498	3.8789	2.85527	0	6.50579	6.40627	4.42973	7.92149	1.74928	5.79547	4.81991	6.69083	5.40231	14
7083	PCDHB9	full-splice_match	mono-exon	FALSE	13	16	14	18	4	4	4	3	4	8	6	10	10	4	11	3.66301	3.05751	2.57551	4.10707	2.85527	3.92321	6.50579	6.40627	2.21487	3.96075	2.62392	6.43941	3.44279	1.67271	4.95211	15
7084	PCDHB10	full-splice_match	mono-exon	FALSE	19	43	18	56	13	12	7	4	26	40	17	18	45	24	38	5.35362	8.21705	3.31137	12.7776	9.27963	11.7696	11.3851	8.5417	14.3966	19.8037	7.43445	11.5909	15.4926	10.0363	17.1073	15
7085	PCDHB8	full-splice_match	mono-exon	FALSE	2	5	0	2	3	2	0	1	1	0	0	3	1	0	2	0.563539	0.95547	0	0.456341	2.14145	1.96161	0	2.13542	0.553717	0	0	1.93182	0.344279	0	0.900384	4
7086	PCDHB11	full-splice_match	mono-exon	FALSE	4	14	16	9	4	4	1	3	11	9	2	8	6	9	12	1.12708	2.67532	2.94344	2.05354	2.85527	3.92321	1.62645	6.40627	6.09088	4.45584	0.874642	5.15153	2.06567	3.76359	5.40231	14
7087	PCDHB12	full-splice_match	mono-exon	FALSE	10	17	38	9	9	3	3	2	8	6	8	4	17	10	15	2.8177	3.2486	6.99067	2.05354	6.42436	2.94241	4.87934	4.27085	4.42973	2.97056	3.49857	2.57576	5.85274	4.18177	6.75288	15
7088	PCDHB13	full-splice_match	mono-exon	FALSE	6	9	15	18	6	4	2	2	8	2	15	5	17	5	21	1.69062	1.71985	2.75947	4.10707	4.28291	3.92321	3.25289	4.27085	4.42973	0.990186	6.55981	3.21971	5.85274	2.09089	9.45403	14
7089	PCDHB14	full-splice_match	mono-exon	FALSE	10	50	35	39	24	6	1	4	27	48	30	21	12	9	47	2.8177	9.5547	6.43877	8.89865	17.1316	5.88482	1.62645	8.5417	14.9503	23.7645	13.1196	13.5228	4.13135	3.76359	21.159	15
7090	PCDHB18P	full-splice_match	mono-exon	FALSE	2	4	7	2	0	0	3	0	3	2	4	5	4	1	7	0.563539	0.764376	1.28775	0.456341	0	0	4.87934	0	1.66115	0.990186	1.74928	3.21971	1.37712	0.418177	3.15134	7
7093	PCDHB15	full-splice_match	mono-exon	FALSE	8	50	10	41	5	5	1	1	12	11	10	9	26	18	9	2.25416	9.5547	1.83965	9.35499	3.56909	4.90402	1.62645	2.13542	6.6446	5.44602	4.37321	5.79547	8.95126	7.52719	4.05173	15
7096	BTN2A1	incomplete-splice_match	5prime_fragment	FALSE	2	23	10	0	0	0	3	0	0	0	4	0	0	0	0	0.563539	4.39516	1.83965	0	0	0	4.87934	0	0	0	1.74928	0	0	0	0	4
7100	HCG11	full-splice_match	mono-exon	FALSE	11	39	13	42	15	0	4	3	7	36	31	15	54	9	5	3.09947	7.45267	2.39154	9.58316	10.7073	0	6.50579	6.40627	3.87602	17.8234	13.5569	9.65912	18.5911	3.76359	2.25096	14
7101	HMGN4	full-splice_match	alternative_3end	FALSE	54	99	97	5	2	3	3	3	3	4	3	4	47	9	36	15.2156	18.9183	17.8446	1.14085	1.42764	2.94241	4.87934	6.40627	1.66115	1.98037	1.31196	2.57576	16.1811	3.76359	16.2069	15
7102	ABT1	full-splice_match	alternative_3end	FALSE	29	0	45	92	13	7	0	5	34	32	18	24	48	40	26	8.17132	0	8.27842	20.9917	9.27963	6.86563	0	10.6771	18.8264	15.843	7.87177	15.4546	16.5254	16.7271	11.705	13
7103	ABT1	incomplete-splice_match	5prime_fragment	FALSE	2	0	1	0	0	2	1	0	1	0	1	2	3	2	1	0.563539	0	0.183965	0	0	1.96161	1.62645	0	0.553717	0	0.437321	1.28788	1.03284	0.836354	0.450192	4
7112	LINC01445	full-splice_match	reference_match	FALSE	16	36	33	30	6	0	2	2	24	4	2	14	5	16	7	4.50831	6.87939	6.07084	6.84512	4.28291	0	3.25289	4.27085	13.2892	1.98037	0.874642	9.01518	1.7214	6.69083	3.15134	13
7119	C8orf33	full-splice_match	alternative_3end	FALSE	3	9	8	0	0	0	0	0	0	0	2	2	4	0	0	0.845309	1.71985	1.47172	0	0	0	0	0	0	0	0.874642	1.28788	1.37712	0	0	4
7122	RNF139	full-splice_match	alternative_3end5end	FALSE	3	136	3	1	0	1	1	0	3	0	1	0	9	1	0	0.845309	25.9888	0.551895	0.228171	0	0.980804	1.62645	0	1.66115	0	0.437321	0	3.09851	0.418177	0	4
7123	novelGene_TATDN1_AS	antisense	multi-exon	FALSE	610	386	675	227	25	13	13	5	126	80	84	24	118	144	56	171.879	73.7623	124.176	51.7947	17.8454	12.7504	21.1438	10.6771	69.7683	39.6075	36.7349	15.4546	40.6249	60.2175	25.2108	15
7124	novelGene_TATDN1_AS	antisense	multi-exon	FALSE	190	72	150	47	14	10	2	7	35	15	47	35	41	47	16	53.5362	13.7588	27.5947	10.724	9.99345	9.80804	3.25289	14.948	19.3801	7.4264	20.5541	22.5379	14.1154	19.6543	7.20307	15
7126	novelGene_TATDN1_AS	antisense	multi-exon	FALSE	8	1	6	1	0	0	1	1	0	1	0	1	1	1	0	2.25416	0.191094	1.10379	0.228171	0	0	1.62645	2.13542	0	0.495093	0	0.643941	0.344279	0.418177	0	4
7139	TATDN1	incomplete-splice_match	5prime_fragment	FALSE	7	0	9	0	0	0	1	0	1	0	0	0	0	0	3	1.97239	0	1.65568	0	0	0	1.62645	0	0.553717	0	0	0	0	0	1.35058	4
7152	TATDN1	full-splice_match	reference_match	FALSE	7	49	63	30	0	0	2	0	20	3	0	1	17	3	2	1.97239	9.36361	11.5898	6.84512	0	0	3.25289	0	11.0743	1.48528	0	0.643941	5.85274	1.25453	0.900384	9
7154	novelGene_MCPH1-DT_AS	antisense	multi-exon	FALSE	6	1	6	4	1	2	2	1	1	4	2	3	4	2	4	1.69062	0.191094	1.10379	0.912682	0.713818	1.96161	3.25289	2.13542	0.553717	1.98037	0.874642	1.93182	1.37712	0.836354	1.80077	9
7155	novelGene_MCPH1-DT_AS	antisense	multi-exon	FALSE	3	0	7	1	0	3	0	3	5	0	3	6	5	6	3	0.845309	0	1.28775	0.228171	0	2.94241	0	6.40627	2.76858	0	1.31196	3.86365	1.7214	2.50906	1.35058	9
7161	MCPH1-DT	novel_in_catalog	combination_of_known_splicesites	FALSE	4	5	6	0	0	2	1	0	1	0	0	1	1	0	0	1.12708	0.95547	1.10379	0	0	1.96161	1.62645	0	0.553717	0	0	0.643941	0.344279	0	0	4
7163	MCPH1-DT	full-splice_match	mono-exon	FALSE	19	9	26	16	22	8	5	2	12	10	7	11	7	10	16	5.35362	1.71985	4.78309	3.65073	15.704	7.84643	8.13224	4.27085	6.6446	4.95093	3.06125	7.08335	2.40995	4.18177	7.20307	15
7170	IARS1	full-splice_match	alternative_5end	FALSE	49	106	103	7	0	1	0	0	1	0	0	0	0	0	1	13.8067	20.256	18.9484	1.59719	0	0.980804	0	0	0.553717	0	0	0	0	0	0.450192	4
7179	IARS1	incomplete-splice_match	internal_fragment	FALSE	1	0	0	0	5	0	0	0	1	3	4	5	6	1	4	0.28177	0	0	0	3.56909	0	0	0	0.553717	1.48528	1.74928	3.21971	2.06567	0.418177	1.80077	6
7183	IARS1	incomplete-splice_match	5prime_fragment	FALSE	7	17	1	5	0	1	1	0	1	7	2	2	1	15	5	1.97239	3.2486	0.183965	1.14085	0	0.980804	1.62645	0	0.553717	3.46565	0.874642	1.28788	0.344279	6.27266	2.25096	8
7185	IARS1	incomplete-splice_match	5prime_fragment	FALSE	1	3	1	2	0	2	0	1	2	0	3	1	1	1	1	0.28177	0.573282	0.183965	0.456341	0	1.96161	0	2.13542	1.10743	0	1.31196	0.643941	0.344279	0.418177	0.450192	4
7186	IARS1	incomplete-splice_match	5prime_fragment	FALSE	19	9	8	0	7	0	0	0	0	0	14	15	15	16	22	5.35362	1.71985	1.47172	0	4.99672	0	0	0	0	0	6.12249	9.65912	5.16419	6.69083	9.90423	9
7187	NOL8	incomplete-splice_match	3prime_fragment	FALSE	8	1	0	0	0	0	0	0	1	0	7	1	21	9	0	2.25416	0.191094	0	0	0	0	0	0	0.553717	0	3.06125	0.643941	7.22986	3.76359	0	4
7211	TOLLIP	full-splice_match	alternative_3end	FALSE	63	79	56	0	19	9	0	3	29	81	74	46	64	26	53	17.7515	15.0964	10.302	0	13.5625	8.82723	0	6.40627	16.0578	40.1025	32.3617	29.6213	22.0339	10.8726	23.8602	13
7214	TOLLIP-DT	full-splice_match	mono-exon	FALSE	17	29	23	10	7	2	5	2	3	11	3	9	16	5	12	4.79008	5.54173	4.23119	2.28171	4.99672	1.96161	8.13224	4.27085	1.66115	5.44602	1.31196	5.79547	5.50847	2.09089	5.40231	15
7217	MOB2	novel_in_catalog	combination_of_known_junctions,intron_retention	FALSE	40	1	1	0	10	5	1	0	0	0	197	0	192	32	152	11.2708	0.191094	0.183965	0	7.13818	4.90402	1.62645	0	0	0	86.1522	0	66.1016	13.3817	68.4292	8
7218	MOB2	full-splice_match	reference_match	FALSE	11	140	101	63	102	66	1	30	101	134	3	5	8	21	8	3.09947	26.7532	18.5805	14.3747	72.8094	64.733	1.62645	64.0627	55.9254	66.3425	1.31196	3.21971	2.75423	8.78172	3.60154	15
7229	PFDN5	full-splice_match	alternative_5end	FALSE	169	56	90	29	6	5	2	5	89	15	28	19	26	29	16	47.6191	10.7013	16.5568	6.61695	4.28291	4.90402	3.25289	10.6771	49.2808	7.4264	12.245	12.2349	8.95126	12.1271	7.20307	15
7230	PFDN5	incomplete-splice_match	5prime_fragment	FALSE	13	18	21	14	9	4	2	2	9	3	7	3	8	8	7	3.66301	3.43969	3.86326	3.19439	6.42436	3.92321	3.25289	4.27085	4.98345	1.48528	3.06125	1.93182	2.75423	3.34542	3.15134	15
7243	PFDN5	full-splice_match	alternative_5end	FALSE	573	477	823	350	138	90	61	21	139	103	157	111	296	297	237	161.454	91.1519	151.403	79.8597	98.5068	88.2723	99.2133	44.8439	76.9666	50.9946	68.6594	71.4775	101.907	124.199	106.696	15
7245	PFDN5	full-splice_match	reference_match	FALSE	6	1	4	1	0	2	0	1	0	0	1	1	0	3	1	1.69062	0.191094	0.73586	0.228171	0	1.96161	0	2.13542	0	0	0.437321	0.643941	0	1.25453	0.450192	4
7251	PFDN5	novel_in_catalog	combination_of_known_junctions,intron_retention	FALSE	55	218	89	24	19	22	7	52	23	92	9	113	26	28	30	15.4973	41.6585	16.3729	5.47609	13.5625	21.5777	11.3851	111.042	12.7355	45.5486	3.93589	72.7653	8.95126	11.709	13.5058	15
7252	PFDN5	full-splice_match	reference_match	FALSE	8	4	7	4	2	0	0	2	5	5	2	5	3	7	4	2.25416	0.764376	1.28775	0.912682	1.42764	0	0	4.27085	2.76858	2.47547	0.874642	3.21971	1.03284	2.92724	1.80077	10
7255	MYG1	full-splice_match	reference_match	FALSE	161	226	163	142	0	37	33	0	106	174	3	102	275	0	142	45.3649	43.1873	29.9863	32.4002	0	36.2897	53.6728	0	58.694	86.1462	1.31196	65.682	94.6768	0	63.9273	12
7256	MYG1	full-splice_match	reference_match	FALSE	16	9	30	3	4	0	3	0	5	6	5	0	12	19	5	4.50831	1.71985	5.51895	0.684512	2.85527	0	4.87934	0	2.76858	2.97056	2.1866	0	4.13135	7.94537	2.25096	11
7261	MYG1	full-splice_match	alternative_5end	FALSE	8	2	6	0	3	3	1	29	2	0	4	3	8	5	3	2.25416	0.382188	1.10379	0	2.14145	2.94241	1.62645	61.9273	1.10743	0	1.74928	1.93182	2.75423	2.09089	1.35058	12
7266	MYG1	full-splice_match	alternative_5end	FALSE	1	2	5	2	2	2	0	1	1	0	2	1	4	4	7	0.28177	0.382188	0.919825	0.456341	1.42764	1.96161	0	2.13542	0.553717	0	0.874642	0.643941	1.37712	1.67271	3.15134	6
7268	MYG1	novel_in_catalog	combination_of_known_splicesites,intron_retention	FALSE	4	0	6	0	0	1	0	0	0	3	2	1	4	0	0	1.12708	0	1.10379	0	0	0.980804	0	0	0	1.48528	0.874642	0.643941	1.37712	0	0	4
7281	ENSG00000291782	full-splice_match	mono-exon	FALSE	4	17	20	15	5	1	6	4	5	18	5	15	21	7	15	1.12708	3.2486	3.6793	3.42256	3.56909	0.980804	9.75868	8.5417	2.76858	8.91168	2.1866	9.65912	7.22986	2.92724	6.75288	14
7282	TTC5	full-splice_match	alternative_3end	FALSE	16	54	46	0	0	0	0	0	0	68	45	0	0	39	108	4.50831	10.3191	8.46239	0	0	0	0	0	0	33.6663	19.6794	0	0	16.3089	48.6207	7
7285	TTC5	full-splice_match	reference_match	FALSE	2	2	2	0	7	7	2	1	5	1	2	2	2	1	5	0.563539	0.382188	0.36793	0	4.99672	6.86563	3.25289	2.13542	2.76858	0.495093	0.874642	1.28788	0.688558	0.418177	2.25096	7
7290	CCNB1IP1	incomplete-splice_match	5prime_fragment	FALSE	1	2	1	0	2	0	0	2	6	3	1	1	0	7	4	0.28177	0.382188	0.183965	0	1.42764	0	0	4.27085	3.3223	1.48528	0.437321	0.643941	0	2.92724	1.80077	6
7294	CCNB1IP1	incomplete-splice_match	5prime_fragment	FALSE	3	1	3	6	4	1	0	0	1	3	2	1	3	3	8	0.845309	0.191094	0.551895	1.36902	2.85527	0.980804	0	0	0.553717	1.48528	0.874642	0.643941	1.03284	1.25453	3.60154	6
7296	CCNB1IP1	full-splice_match	reference_match	FALSE	7	15	14	2	2	33	0	1	4	62	2	69	68	51	7	1.97239	2.86641	2.57551	0.456341	1.42764	32.3665	0	2.13542	2.21487	30.6958	0.874642	44.4319	23.411	21.327	3.15134	12
7301	RPPH1	full-splice_match	mono-exon	FALSE	6	5	9	23	8	3	3	3	12	8	17	12	23	20	21	1.69062	0.95547	1.65568	5.24792	5.71054	2.94241	4.87934	6.40627	6.6446	3.96075	7.43445	7.72729	7.91842	8.36354	9.45403	14
7309	PARP2	incomplete-splice_match	5prime_fragment	FALSE	4	3	1	3	0	1	0	0	3	1	2	5	2	2	3	1.12708	0.573282	0.183965	0.684512	0	0.980804	0	0	1.66115	0.495093	0.874642	3.21971	0.688558	0.836354	1.35058	4
7316	OSGEP	full-splice_match	alternative_3end	FALSE	18	6	15	4	4	5	1	0	0	10	1	1	1	0	3	5.07185	1.14656	2.75947	0.912682	2.85527	4.90402	1.62645	0	0	4.95093	0.437321	0.643941	0.344279	0	1.35058	8
7319	OSGEP	novel_not_in_catalog	partial_intron_retention	FALSE	4	0	0	0	0	0	5	0	0	0	0	0	3	6	1	1.12708	0	0	0	0	0	8.13224	0	0	0	0	0	1.03284	2.50906	0.450192	4
7320	OSGEP	incomplete-splice_match	intron_retention	FALSE	2	1	0	3	2	0	0	0	1	44	0	1	3	0	4	0.563539	0.191094	0	0.684512	1.42764	0	0	0	0.553717	21.7841	0	0.643941	1.03284	0	1.80077	4
7324	APEX1	full-splice_match	reference_match	FALSE	74	23	185	4	15	2	0	0	54	0	18	1	0	2	0	20.851	4.39516	34.0335	0.912682	10.7073	1.96161	0	0	29.9007	0	7.87177	0.643941	0	0.836354	0	7
7326	APEX1	full-splice_match	reference_match	FALSE	5	5	9	0	0	12	0	0	1	21	0	25	68	45	0	1.40885	0.95547	1.65568	0	0	11.7696	0	0	0.553717	10.397	0	16.0985	23.411	18.818	0	7
7329	APEX1	incomplete-splice_match	5prime_fragment	FALSE	24	5	13	8	0	0	1	1	2	1	2	2	3	10	0	6.76247	0.95547	2.39154	1.82536	0	0	1.62645	2.13542	1.10743	0.495093	0.874642	1.28788	1.03284	4.18177	0	9
7330	APEX1	incomplete-splice_match	5prime_fragment	FALSE	3	7	5	5	1	1	0	0	2	2	2	0	3	0	1	0.845309	1.33766	0.919825	1.14085	0.713818	0.980804	0	0	1.10743	0.990186	0.874642	0	1.03284	0	0.450192	4
7334	PIP4P1	incomplete-splice_match	5prime_fragment	FALSE	3	1	9	4	0	0	2	0	0	4	4	2	1	2	0	0.845309	0.191094	1.65568	0.912682	0	0	3.25289	0	0	1.98037	1.74928	1.28788	0.344279	0.836354	0	5
7337	PIP4P1	full-splice_match	alternative_3end5end	FALSE	74	7	7	186	3	26	0	0	0	6	2	1	2	1	0	20.851	1.33766	1.28775	42.4397	2.14145	25.5009	0	0	0	2.97056	0.874642	0.643941	0.688558	0.418177	0	7
7339	PIP4P1	full-splice_match	reference_match	FALSE	2	19	103	1	2	0	0	0	2	0	69	22	150	5	73	0.563539	3.63079	18.9484	0.228171	1.42764	0	0	0	1.10743	0	30.1751	14.1667	51.6419	2.09089	32.864	9
7342	PNP	full-splice_match	reference_match	FALSE	8	26	8	0	4	0	0	0	6	0	0	0	0	15	0	2.25416	4.96845	1.47172	0	2.85527	0	0	0	3.3223	0	0	0	0	6.27266	0	6
7344	SH3GL3	full-splice_match	reference_match	FALSE	16	8	207	1	2	3	0	0	0	5	125	0	3	18	0	4.50831	1.52875	38.0807	0.228171	1.42764	2.94241	0	0	0	2.47547	54.6651	0	1.03284	7.52719	0	9
7345	SH3GL3	full-splice_match	alternative_3end	FALSE	26	265	7	2	0	32	0	0	9	0	1	0	0	2	2	7.32601	50.6399	1.28775	0.456341	0	31.3857	0	0	4.98345	0	0.437321	0	0	0.836354	0.900384	5
7346	SH3GL3	incomplete-splice_match	5prime_fragment	FALSE	78	49	51	25	10	7	4	2	44	23	22	28	12	32	12	21.978	9.36361	9.38221	5.70426	7.13818	6.86563	6.50579	4.27085	24.3635	11.3871	9.62106	18.0304	4.13135	13.3817	5.40231	15
7350	SH3GL3	incomplete-splice_match	5prime_fragment	FALSE	25	16	5	1	1	3	0	0	2	3	4	3	0	1	2	7.04424	3.05751	0.919825	0.228171	0.713818	2.94241	0	0	1.10743	1.48528	1.74928	1.93182	0	0.418177	0.900384	7
7352	SH3GL3	full-splice_match	alternative_3end5end	FALSE	17	28	21	4	4	0	2	1	1	2	4	5	0	12	1	4.79008	5.35063	3.86326	0.912682	2.85527	0	3.25289	2.13542	0.553717	0.990186	1.74928	3.21971	0	5.01813	0.450192	9
7360	SH3GL3	incomplete-splice_match	3prime_fragment	FALSE	4	1	2	0	0	1	26	22	1	0	1	0	1	9	2	1.12708	0.191094	0.36793	0	0	0.980804	42.2876	46.9793	0.553717	0	0.437321	0	0.344279	3.76359	0.900384	4
7362	SH3GL3	incomplete-splice_match	3prime_fragment	FALSE	10	2	11	1	2	2	1	1	4	2	1	7	3	5	4	2.8177	0.382188	2.02361	0.228171	1.42764	1.96161	1.62645	2.13542	2.21487	0.990186	0.437321	4.50759	1.03284	2.09089	1.80077	11
7366	SH3GL3	incomplete-splice_match	5prime_fragment	FALSE	15	6	6	3	1	0	1	1	0	2	0	0	4	0	0	4.22655	1.14656	1.10379	0.684512	0.713818	0	1.62645	2.13542	0	0.990186	0	0	1.37712	0	0	6
7391	ENSG00000291627	full-splice_match	mono-exon	FALSE	5	8	9	7	4	3	1	1	7	4	5	3	14	4	1	1.40885	1.52875	1.65568	1.59719	2.85527	2.94241	1.62645	2.13542	3.87602	1.98037	2.1866	1.93182	4.81991	1.67271	0.450192	14
7395	EGLN1P1	full-splice_match	mono-exon	FALSE	4	9	7	1	0	1	2	2	1	0	3	2	2	1	3	1.12708	1.71985	1.28775	0.228171	0	0.980804	3.25289	4.27085	0.553717	0	1.31196	1.28788	0.688558	0.418177	1.35058	8
7404	NMB	full-splice_match	alternative_5end	FALSE	27	37	16	17	0	0	0	2	6	0	7	0	22	22	0	7.60778	7.07048	2.94344	3.8789	0	0	0	4.27085	3.3223	0	3.06125	0	7.57414	9.1999	0	9
7406	NOP10	full-splice_match	alternative_3end	FALSE	315	205	343	170	41	27	21	21	95	111	145	80	182	166	108	88.7574	39.1743	63.1	38.789	29.2665	26.4817	34.1554	44.8439	52.6031	54.9553	63.4115	51.5153	62.6588	69.4174	48.6207	15
7409	LPCAT4	full-splice_match	alternative_3end5end	FALSE	1	3	9	2	8	1	0	1	0	0	0	0	8	4	1	0.28177	0.573282	1.65568	0.456341	5.71054	0.980804	0	2.13542	0	0	0	0	2.75423	1.67271	0.450192	5
7411	LPCAT4	incomplete-splice_match	3prime_fragment	FALSE	5	0	117	2	231	11	4	6	4	12	23	15	19	3	577	1.40885	0	21.5239	0.456341	164.892	10.7888	6.50579	12.8125	2.21487	5.94112	10.0584	9.65912	6.5413	1.25453	259.761	13
7412	LPCAT4	full-splice_match	alternative_3end	FALSE	5	0	18	371	11	0	0	0	0	380	0	0	0	154	11	1.40885	0	3.31137	84.6513	7.85199	0	0	0	0	188.135	0	0	0	64.3993	4.95211	7
7424	GOLGA8A	incomplete-splice_match	internal_fragment	FALSE	13	0	11	0	0	1	0	1	0	0	0	7	0	0	0	3.66301	0	2.02361	0	0	0.980804	0	2.13542	0	0	0	4.50759	0	0	0	4
7426	ENSG00000291992	full-splice_match	mono-exon	FALSE	2	2	4	6	13	6	4	4	7	1	14	2	7	18	6	0.563539	0.382188	0.73586	1.36902	9.27963	5.88482	6.50579	8.5417	3.87602	0.495093	6.12249	1.28788	2.40995	7.52719	2.70115	11
7428	MSRB1	full-splice_match	alternative_5end	FALSE	32	74	46	44	4	4	4	0	33	21	8	0	28	25	18	9.01663	14.141	8.46239	10.0395	2.85527	3.92321	6.50579	0	18.2726	10.397	3.49857	0	9.63982	10.4544	8.10346	13
7431	NDUFB10	full-splice_match	alternative_5end	FALSE	819	533	840	352	55	49	36	18	204	144	192	124	234	231	137	230.769	101.853	154.531	80.316	39.26	48.0594	58.5521	38.4376	112.958	71.2934	83.9656	79.8487	80.5613	96.5989	61.6763	15
7433	NDUFB10	full-splice_match	alternative_3end	FALSE	26	68	57	49	24	8	4	0	22	17	18	0	25	41	15	7.32601	12.9944	10.486	11.1804	17.1316	7.84643	6.50579	0	12.1818	8.41658	7.87177	0	8.60698	17.1453	6.75288	13
7439	SNHG9	full-splice_match	reference_match	FALSE	478	517	547	325	383	151	71	62	235	176	267	268	268	325	349	134.686	98.7956	100.629	74.1554	273.392	148.101	115.478	132.396	130.123	87.1364	116.765	172.576	92.2668	135.908	157.117	15
7440	SNHG9	full-splice_match	mono-exon	FALSE	39	34	32	10	22	10	9	4	14	9	21	11	17	23	22	10.989	6.4972	5.88688	2.28171	15.704	9.80804	14.638	8.5417	7.75203	4.45584	9.18374	7.08335	5.85274	9.61807	9.90423	15
7444	RPS2	incomplete-splice_match	3prime_fragment	FALSE	3	0	1	7	0	1	1	0	2	2	1	2	2	0	2	0.845309	0	0.183965	1.59719	0	0.980804	1.62645	0	1.10743	0.990186	0.437321	1.28788	0.688558	0	0.900384	4
7445	RPS2	full-splice_match	alternative_5end	FALSE	917	1815	2064	1071	107	70	55	95	562	687	369	613	888	437	218	258.383	346.836	379.704	244.371	76.3785	68.6563	89.4546	202.865	311.189	340.129	161.371	394.736	305.72	182.743	98.1419	15
7446	ENSG00000291934	full-splice_match	mono-exon	FALSE	4	7	6	1	119	3	1	0	2	1	0	1	1	0	0	1.12708	1.33766	1.10379	0.228171	84.9443	2.94241	1.62645	0	1.10743	0.495093	0	0.643941	0.344279	0	0	7
7448	RPS2	incomplete-splice_match	3prime_fragment	FALSE	7	14	13	17	1	1	2	1	6	2	2	1	8	8	1	1.97239	2.67532	2.39154	3.8789	0.713818	0.980804	3.25289	2.13542	3.3223	0.990186	0.874642	0.643941	2.75423	3.34542	0.450192	9
7450	RPS2	incomplete-splice_match	intron_retention	FALSE	14	24	27	4	4	1	0	0	4	2	4	0	5	10	3	3.94478	4.58626	4.96705	0.912682	2.85527	0.980804	0	0	2.21487	0.990186	1.74928	0	1.7214	4.18177	1.35058	9
7454	ENSG00000291937	full-splice_match	mono-exon	FALSE	45	45	42	28	26	23	10	5	26	11	24	48	27	18	33	12.6796	8.59923	7.72653	6.38878	18.5593	22.5585	16.2645	10.6771	14.3966	5.44602	10.4957	30.9092	9.29554	7.52719	14.8563	15
7459	GFER	full-splice_match	alternative_3end5end	FALSE	24	8	52	16	3	0	0	3	7	7	0	6	1	11	2	6.76247	1.52875	9.56618	3.65073	2.14145	0	0	6.40627	3.87602	3.46565	0	3.86365	0.344279	4.59995	0.900384	10
7464	SYNGR3	full-splice_match	reference_match	FALSE	132	1	4	0	124	1	0	80	0	3	3	3	1	125	78	37.1936	0.191094	0.73586	0	88.5134	0.980804	0	170.834	0	1.48528	1.31196	1.93182	0.344279	52.2721	35.115	8
7465	ZNF598	incomplete-splice_match	5prime_fragment	FALSE	1	2	1	1	2	0	0	0	1	1	2	2	3	2	3	0.28177	0.382188	0.183965	0.228171	1.42764	0	0	0	0.553717	0.495093	0.874642	1.28788	1.03284	0.836354	1.35058	4
7467	NPW	full-splice_match	reference_match	FALSE	21	0	8	3	0	0	0	0	1	6	0	2	4	16	0	5.91716	0	1.47172	0.684512	0	0	0	0	0.553717	2.97056	0	1.28788	1.37712	6.69083	0	6
7483	C16orf46	novel_in_catalog	combination_of_known_splicesites	FALSE	4	31	2	0	12	0	0	0	1	0	3	0	0	0	0	1.12708	5.92392	0.36793	0	8.56581	0	0	0	0.553717	0	1.31196	0	0	0	0	4
7484	CMC2	full-splice_match	reference_match	FALSE	3	27	9	5	11	0	0	0	0	35	30	0	0	3	0	0.845309	5.15954	1.65568	1.14085	7.85199	0	0	0	0	17.3283	13.1196	0	0	1.25453	0	7
7494	GCSH	full-splice_match	alternative_5end	FALSE	242	290	293	210	29	41	5	0	96	59	36	66	24	81	60	68.1883	55.4173	53.9017	47.9158	20.7007	40.213	8.13224	0	53.1568	29.2105	15.7435	42.5001	8.2627	33.8723	27.0115	14
7496	GCSH	novel_in_catalog	combination_of_known_junctions	FALSE	3	13	64	4	3	0	0	0	1	0	1	2	1	1	0	0.845309	2.48422	11.7738	0.912682	2.14145	0	0	0	0.553717	0	0.437321	1.28788	0.344279	0.418177	0	4
7503	GCSH	full-splice_match	alternative_3end5end	FALSE	15	16	9	4	0	0	2	0	5	1	0	1	4	4	2	4.22655	3.05751	1.65568	0.912682	0	0	3.25289	0	2.76858	0.495093	0	0.643941	1.37712	1.67271	0.900384	7
7506	CMC2	full-splice_match	alternative_3end5end	FALSE	78	88	82	113	4	0	1	8	12	4	5	8	6	16	0	21.978	16.8163	15.0851	25.7833	2.85527	0	1.62645	17.0834	6.6446	1.98037	2.1866	5.15153	2.06567	6.69083	0	13
7507	CMC2	incomplete-splice_match	3prime_fragment	FALSE	1	2	5	0	0	1	11	2	5	1	1	0	2	4	5	0.28177	0.382188	0.919825	0	0	0.980804	17.8909	4.27085	2.76858	0.495093	0.437321	0	0.688558	1.67271	2.25096	5
7509	GCSH	incomplete-splice_match	5prime_fragment	FALSE	10	2	14	10	2	2	1	0	6	5	5	7	10	7	6	2.8177	0.382188	2.57551	2.28171	1.42764	1.96161	1.62645	0	3.3223	2.47547	2.1866	4.50759	3.44279	2.92724	2.70115	13
7518	ENSG00000291962	full-splice_match	mono-exon	FALSE	1	0	0	1	0	2	2	1	1	1	3	3	0	0	0	0.28177	0	0	0.228171	0	1.96161	3.25289	2.13542	0.553717	0.495093	1.31196	1.93182	0	0	0	5
7520	CMC2	novel_in_catalog	combination_of_known_junctions	FALSE	12	1	4	1	1	2	0	0	2	5	7	1	4	29	4	3.38124	0.191094	0.73586	0.228171	0.713818	1.96161	0	0	1.10743	2.47547	3.06125	0.643941	1.37712	12.1271	1.80077	8
7523	CMC2	novel_in_catalog	combination_of_known_junctions	FALSE	42	45	56	33	3	1	0	1	19	5	6	11	54	14	5	11.8343	8.59923	10.302	7.52963	2.14145	0.980804	0	2.13542	10.5206	2.47547	2.62392	7.08335	18.5911	5.85448	2.25096	13
7525	CMC2	full-splice_match	alternative_3end	FALSE	10	20	20	16	2	12	0	0	27	0	3	1	0	10	1	2.8177	3.82188	3.6793	3.65073	1.42764	11.7696	0	0	14.9503	0	1.31196	0.643941	0	4.18177	0.450192	9
7526	CMC2	novel_in_catalog	combination_of_known_splicesites	FALSE	21	19	19	7	8	1	1	1	6	2	6	5	3	10	1	5.91716	3.63079	3.49533	1.59719	5.71054	0.980804	1.62645	2.13542	3.3223	0.990186	2.62392	3.21971	1.03284	4.18177	0.450192	12
7527	CMC2	novel_in_catalog	combination_of_known_junctions	FALSE	13	0	17	4	0	0	0	0	0	2	2	3	1	4	4	3.66301	0	3.1274	0.912682	0	0	0	0	0	0.990186	0.874642	1.93182	0.344279	1.67271	1.80077	5
7529	ENSG00000291949	full-splice_match	mono-exon	FALSE	6	3	6	1	3	2	3	1	7	3	8	1	12	7	10	1.69062	0.573282	1.10379	0.228171	2.14145	1.96161	4.87934	2.13542	3.87602	1.48528	3.49857	0.643941	4.13135	2.92724	4.50192	12
7531	CMC2	incomplete-splice_match	5prime_fragment	FALSE	8	5	7	7	1	2	0	0	6	1	2	4	2	12	7	2.25416	0.95547	1.28775	1.59719	0.713818	1.96161	0	0	3.3223	0.495093	0.874642	2.57576	0.688558	5.01813	3.15134	8
7536	GAA	full-splice_match	reference_match	FALSE	6	6	6	13	1	0	0	0	1	5	14	4	19	0	1	1.69062	1.14656	1.10379	2.96622	0.713818	0	0	0	0.553717	2.47547	6.12249	2.57576	6.5413	0	0.450192	8
7537	GAA	incomplete-splice_match	3prime_fragment	FALSE	66	1	0	1	0	0	0	1	69	0	0	99	170	0	0	18.5968	0.191094	0	0.228171	0	0	0	2.13542	38.2064	0	0	63.7502	58.5274	0	0	5
7539	EIF4A3	full-splice_match	alternative_3end	FALSE	39	108	89	0	1	0	0	0	36	10	0	0	2	49	41	10.989	20.6382	16.3729	0	0.713818	0	0	0	19.9338	4.95093	0	0	0.688558	20.4907	18.4579	7
7545	ENSG00000291511	full-splice_match	mono-exon	FALSE	12	3	0	7	20	23	9	9	5	13	16	10	11	4	67	3.38124	0.573282	0	1.59719	14.2764	22.5585	14.638	19.2188	2.76858	6.43621	6.99713	6.43941	3.78707	1.67271	30.1629	13
7560	DPRXP4	full-splice_match	mono-exon	FALSE	2	3	6	2	0	3	0	0	1	1	3	4	2	2	1	0.563539	0.573282	1.10379	0.456341	0	2.94241	0	0	0.553717	0.495093	1.31196	2.57576	0.688558	0.836354	0.450192	4
7565	ENSG00000291728	full-splice_match	alternative_5end	FALSE	35	4	0	1	4	13	5	6	5	0	5	8	4	6	10	9.86194	0.764376	0	0.228171	2.85527	12.7504	8.13224	12.8125	2.76858	0	2.1866	5.15153	1.37712	2.50906	4.50192	11
7585	OMG	full-splice_match	alternative_3end	FALSE	2	9	0	11	0	0	1	0	0	0	0	0	4	1	0	0.563539	1.71985	0	2.50988	0	0	1.62645	0	0	0	0	0	1.37712	0.418177	0	4
7588	OMG	full-splice_match	alternative_5end	FALSE	396	578	637	1077	7	11	34	3	237	233	104	91	21	32	191	111.581	110.452	117.186	245.74	4.99672	10.7888	55.2992	6.40627	131.231	115.357	45.4814	58.5986	7.22986	13.3817	85.9867	15
7594	OMG	full-splice_match	mono-exon	FALSE	29	62	33	19	26	16	2	12	28	6	7	15	225	145	33	8.17132	11.8478	6.07084	4.33524	18.5593	15.6929	3.25289	25.6251	15.5041	2.97056	3.06125	9.65912	77.4628	60.6357	14.8563	15
7600	ENSG00000291722	novel_not_in_catalog	novel_exon	FALSE	596	961	0	1844	62	77	3	0	0	147	31	127	234	0	151	167.935	183.641	0	420.747	44.2567	75.5219	4.87934	0	0	72.7787	13.5569	81.7805	80.5613	0	67.979	11
7610	LINC03048	full-splice_match	mono-exon	FALSE	248	166	94	137	24	75	3	15	78	10	31	79	56	36	31	69.8789	31.7216	17.2927	31.2594	17.1316	73.5603	4.87934	32.0314	43.1899	4.95093	13.5569	50.8713	19.2796	15.0544	13.956	15
7612	LINC03048	incomplete-splice_match	5prime_fragment	FALSE	48	89	27	25	7	11	0	0	8	8	5	15	2	2	7	13.5249	17.0074	4.96705	5.70426	4.99672	10.7888	0	0	4.42973	3.96075	2.1866	9.65912	0.688558	0.836354	3.15134	11
7613	LINC03048	full-splice_match	reference_match	FALSE	60	60	23	9	0	6	3	0	9	4	3	10	2	7	17	16.9062	11.4656	4.23119	2.05354	0	5.88482	4.87934	0	4.98345	1.98037	1.31196	6.43941	0.688558	2.92724	7.65327	12
7614	LINC03048	full-splice_match	alternative_3end	FALSE	42	37	22	2	0	15	0	9	13	0	0	31	6	9	7	11.8343	7.07048	4.04723	0.456341	0	14.7121	0	19.2188	7.19832	0	0	19.9622	2.06567	3.76359	3.15134	10
7615	ENSG00000291411	full-splice_match	mono-exon	FALSE	7	7	3	1	5	6	1	0	3	0	0	5	3	1	2	1.97239	1.33766	0.551895	0.228171	3.56909	5.88482	1.62645	0	1.66115	0	0	3.21971	1.03284	0.418177	0.900384	8
7617	BAHCC1	full-splice_match	mono-exon	FALSE	5	10	19	4	32	10	26	2	4	33	47	41	12	3	23	1.40885	1.91094	3.49533	0.912682	22.8422	9.80804	42.2876	4.27085	2.21487	16.3381	20.5541	26.4016	4.13135	1.25453	10.3544	14
7618	BAHCC1	full-splice_match	alternative_3end5end	FALSE	11	0	0	21	0	27	0	15	0	0	0	0	0	0	0	3.09947	0	0	4.79158	0	26.4817	0	32.0314	0	0	0	0	0	0	0	4
7622	LINC01971	full-splice_match	mono-exon	FALSE	2	3	1	1	3	1	1	1	1	2	0	1	5	2	7	0.563539	0.573282	0.183965	0.228171	2.14145	0.980804	1.62645	2.13542	0.553717	0.990186	0	0.643941	1.7214	0.836354	3.15134	5
7623	ACTG1	full-splice_match	alternative_5end	FALSE	998	1607	1670	1491	174	25	120	12	662	1043	600	403	1044	827	20	281.206	307.088	307.221	340.202	124.204	24.5201	195.174	25.6251	366.56	516.382	262.392	259.508	359.427	345.833	9.00384	15
7625	ACTG1	full-splice_match	alternative_5end	FALSE	5	4	9	0	3	0	0	0	0	0	0	0	0	10	632	1.40885	0.764376	1.65568	0	2.14145	0	0	0	0	0	0	0	0	4.18177	284.521	5
7632	ACTG1	incomplete-splice_match	3prime_fragment	FALSE	1	1	1	2	0	1	0	1	2	2	2	0	6	16	1	0.28177	0.191094	0.183965	0.456341	0	0.980804	0	2.13542	1.10743	0.990186	0.874642	0	2.06567	6.69083	0.450192	4
7635	ACTG1	incomplete-splice_match	3prime_fragment	FALSE	1	3	2	0	0	0	0	6	3	1	2	2	1	1	3	0.28177	0.573282	0.36793	0	0	0	0	12.8125	1.66115	0.495093	0.874642	1.28788	0.344279	0.418177	1.35058	4
7636	ACTG1	incomplete-splice_match	5prime_fragment	FALSE	5	2	6	1	0	0	1	2	0	0	4	0	2	2	0	1.40885	0.382188	1.10379	0.228171	0	0	1.62645	4.27085	0	0	1.74928	0	0.688558	0.836354	0	5
7637	ACTG1	incomplete-splice_match	5prime_fragment	FALSE	25	8	20	4	2	1	2	1	2	6	8	12	5	11	7	7.04424	1.52875	3.6793	0.912682	1.42764	0.980804	3.25289	2.13542	1.10743	2.97056	3.49857	7.72729	1.7214	4.59995	3.15134	13
7638	ACTG1	incomplete-splice_match	5prime_fragment	FALSE	5	4	0	3	1	1	0	0	7	2	3	3	10	8	5	1.40885	0.764376	0	0.684512	0.713818	0.980804	0	0	3.87602	0.990186	1.31196	1.93182	3.44279	3.34542	2.25096	7
7642	GPRC5C	full-splice_match	mono-exon	FALSE	4	1	0	0	4	1	2	2	0	11	0	0	0	0	0	1.12708	0.191094	0	0	2.85527	0.980804	3.25289	4.27085	0	5.44602	0	0	0	0	0	5
7646	GMFG	novel_not_in_catalog	novel_exon	FALSE	6	0	7	0	0	0	1	0	0	1	1	3	9	3	2	1.69062	0	1.28775	0	0	0	1.62645	0	0	0.495093	0.437321	1.93182	3.09851	1.25453	0.900384	6
7648	GMFG	full-splice_match	reference_match	FALSE	2	13	22	0	0	0	0	0	1	1	3	1	6	1	0	0.563539	2.48422	4.04723	0	0	0	0	0	0.553717	0.495093	1.31196	0.643941	2.06567	0.418177	0	4
7649	ENSG00000291879	full-splice_match	mono-exon	FALSE	183	212	154	136	138	85	41	40	105	62	131	146	104	137	142	51.5638	40.5119	28.3306	31.0312	98.5068	83.3683	66.6843	85.417	58.1402	30.6958	57.289	94.0154	35.805	57.2903	63.9273	15
7656	NDUFA11	novel_not_in_catalog	Alt3	FALSE	8	4	3	2	1	0	0	0	0	81	0	2	0	8	0	2.25416	0.764376	0.551895	0.456341	0.713818	0	0	0	0	40.1025	0	1.28788	0	3.34542	0	4
7660	NDUFA11	full-splice_match	reference_match	FALSE	1224	582	1141	367	46	35	48	41	213	111	231	101	281	291	147	344.886	111.217	209.904	83.7386	32.8356	34.3281	78.0695	87.5524	117.942	54.9553	101.021	65.0381	96.7424	121.69	66.1782	15
7667	NDUFA11	full-splice_match	alternative_3end	FALSE	29	1	21	14	46	30	1	0	0	15	1	0	3	1	0	8.17132	0.191094	3.86326	3.19439	32.8356	29.4241	1.62645	0	0	7.4264	0.437321	0	1.03284	0.418177	0	8
7668	NDUFA11	full-splice_match	reference_match	FALSE	11	15	30	4	0	0	0	0	1	2	0	2	0	1	1	3.09947	2.86641	5.51895	0.912682	0	0	0	0	0.553717	0.990186	0	1.28788	0	0.418177	0.450192	4
7670	VMAC	full-splice_match	alternative_3end	FALSE	8	5	17	0	0	7	5	3	2	2	4	3	3	4	1	2.25416	0.95547	3.1274	0	0	6.86563	8.13224	6.40627	1.10743	0.990186	1.74928	1.93182	1.03284	1.67271	0.450192	10
7680	MROH8	incomplete-splice_match	3prime_fragment	FALSE	4	0	0	0	0	8	0	0	0	0	0	5	6	0	0	1.12708	0	0	0	0	7.84643	0	0	0	0	0	3.21971	2.06567	0	0	4
7689	RPN2	incomplete-splice_match	5prime_fragment	FALSE	3	1	4	0	1	3	0	1	2	0	3	4	1	3	1	0.845309	0.191094	0.73586	0	0.713818	2.94241	0	2.13542	1.10743	0	1.31196	2.57576	0.344279	1.25453	0.450192	6
7694	RPN2	full-splice_match	alternative_3end	FALSE	25	2	112	0	0	0	0	0	0	0	0	8	0	15	0	7.04424	0.382188	20.6041	0	0	0	0	0	0	0	0	5.15153	0	6.27266	0	4
7696	MANBAL	full-splice_match	reference_match	FALSE	77	92	28	143	21	14	0	0	0	76	44	0	104	64	55	21.6963	17.5807	5.15102	32.6284	14.9902	13.7313	0	0	0	37.6271	19.2421	0	35.805	26.7633	24.7606	11
7698	MANBAL	novel_in_catalog	combination_of_known_splicesites	FALSE	7	4	148	2	1	0	0	0	2	0	1	1	0	5	0	1.97239	0.764376	27.2268	0.456341	0.713818	0	0	0	1.10743	0	0.437321	0.643941	0	2.09089	0	4
7704	USP16	incomplete-splice_match	5prime_fragment	FALSE	39	98	59	46	0	0	0	0	0	0	0	0	0	0	7	10.989	18.7272	10.8539	10.4958	0	0	0	0	0	0	0	0	0	0	3.15134	5
7705	USP16	incomplete-splice_match	5prime_fragment	FALSE	47	1	50	0	0	0	0	0	0	9	0	0	0	14	0	13.2432	0.191094	9.19825	0	0	0	0	0	0	4.45584	0	0	0	5.85448	0	4
7706	USP16	incomplete-splice_match	5prime_fragment	FALSE	8	16	8	0	0	2	0	1	1	2	2	9	2	5	3	2.25416	3.05751	1.47172	0	0	1.96161	0	2.13542	0.553717	0.990186	0.874642	5.79547	0.688558	2.09089	1.35058	8
7708	USP16	incomplete-splice_match	5prime_fragment	FALSE	8	4	13	5	0	1	1	0	1	2	1	6	4	0	1	2.25416	0.764376	2.39154	1.14085	0	0.980804	1.62645	0	0.553717	0.990186	0.437321	3.86365	1.37712	0	0.450192	6
7725	LTN1	incomplete-splice_match	5prime_fragment	FALSE	9	11	7	12	2	4	2	1	0	0	1	1	5	4	1	2.53593	2.10204	1.28775	2.73805	1.42764	3.92321	3.25289	2.13542	0	0	0.437321	0.643941	1.7214	1.67271	0.450192	10
7737	LTN1	incomplete-splice_match	5prime_fragment	FALSE	26	42	19	35	3	0	0	0	0	6	0	0	1	0	8	7.32601	8.02595	3.49533	7.98597	2.14145	0	0	0	0	2.97056	0	0	0.344279	0	3.60154	7
7747	LTN1	incomplete-splice_match	5prime_fragment	FALSE	8	5	9	6	1	1	0	0	2	0	1	3	0	1	1	2.25416	0.95547	1.65568	1.36902	0.713818	0.980804	0	0	1.10743	0	0.437321	1.93182	0	0.418177	0.450192	5
7749	RPL23P2	full-splice_match	mono-exon	FALSE	1	4	0	15	1	4	1	1	4	2	0	3	1	3	0	0.28177	0.764376	0	3.42256	0.713818	3.92321	1.62645	2.13542	2.21487	0.990186	0	1.93182	0.344279	1.25453	0	7
7753	RWDD2B	incomplete-splice_match	3prime_fragment	FALSE	11	1	5	9	0	3	0	0	7	7	1	0	13	0	5	3.09947	0.191094	0.919825	2.05354	0	2.94241	0	0	3.87602	3.46565	0.437321	0	4.47563	0	2.25096	7
7755	RWDD2B	incomplete-splice_match	5prime_fragment	FALSE	9	2	5	0	0	2	1	0	0	1	1	2	0	0	1	2.53593	0.382188	0.919825	0	0	1.96161	1.62645	0	0	0.495093	0.437321	1.28788	0	0	0.450192	4
7757	ENSG00000291531	full-splice_match	mono-exon	FALSE	8	1	3	4	5	2	0	2	1	5	2	1	0	7	4	2.25416	0.191094	0.551895	0.912682	3.56909	1.96161	0	4.27085	0.553717	2.47547	0.874642	0.643941	0	2.92724	1.80077	7
7760	CCT8	full-splice_match	reference_match	FALSE	55	16	203	345	4	62	0	0	5	7	191	3	42	10	9	15.4973	3.05751	37.3449	78.7188	2.85527	60.8098	0	0	2.76858	3.46565	83.5283	1.93182	14.4597	4.18177	4.05173	13
7762	CCT8	incomplete-splice_match	5prime_fragment	FALSE	24	25	40	18	3	0	4	0	6	11	11	10	9	8	4	6.76247	4.77735	7.3586	4.10707	2.14145	0	6.50579	0	3.3223	5.44602	4.81053	6.43941	3.09851	3.34542	1.80077	13
7763	CCT8	incomplete-splice_match	5prime_fragment	FALSE	5	8	12	6	0	2	1	0	5	1	4	0	3	8	0	1.40885	1.52875	2.20758	1.36902	0	1.96161	1.62645	0	2.76858	0.495093	1.74928	0	1.03284	3.34542	0	10
7767	CCT8	incomplete-splice_match	5prime_fragment	FALSE	7	12	0	7	4	3	0	0	0	0	0	6	0	0	2	1.97239	2.29313	0	1.59719	2.85527	2.94241	0	0	0	0	0	3.86365	0	0	0.900384	6
7768	CCT8	incomplete-splice_match	5prime_fragment	FALSE	5	3	3	4	1	2	2	1	0	2	2	2	3	2	6	1.40885	0.573282	0.551895	0.912682	0.713818	1.96161	3.25289	2.13542	0	0.990186	0.874642	1.28788	1.03284	0.836354	2.70115	7
7769	CCT8	incomplete-splice_match	5prime_fragment	FALSE	4	2	4	0	2	1	0	0	2	0	0	0	3	3	2	1.12708	0.382188	0.73586	0	1.42764	0.980804	0	0	1.10743	0	0	0	1.03284	1.25453	0.900384	5
7770	CCT8	incomplete-splice_match	5prime_fragment	FALSE	5	11	10	6	1	1	1	1	5	7	7	4	10	9	9	1.40885	2.10204	1.83965	1.36902	0.713818	0.980804	1.62645	2.13542	2.76858	3.46565	3.06125	2.57576	3.44279	3.76359	4.05173	13
7774	PCP4	full-splice_match	alternative_5end	FALSE	598	115	479	134	85	78	31	21	139	156	25	293	284	177	146	168.498	21.9758	88.1192	30.5749	60.6745	76.5027	50.4199	44.8439	76.9666	77.2345	10.933	188.675	97.7753	74.0174	65.728	15
7781	DSCAM	incomplete-splice_match	3prime_fragment	FALSE	2	0	17	0	0	7	0	2	16	1	7	1	0	0	0	0.563539	0	3.1274	0	0	6.86563	0	4.27085	8.85947	0.495093	3.06125	0.643941	0	0	0	5
7790	ENSG00000291770	full-splice_match	mono-exon	FALSE	10	16	12	6	4	2	5	6	12	10	25	8	6	5	14	2.8177	3.05751	2.20758	1.36902	2.85527	1.96161	8.13224	12.8125	6.6446	4.95093	10.933	5.15153	2.06567	2.09089	6.30269	15
7791	TCEAL2	incomplete-splice_match	5prime_fragment	FALSE	4	1	22	2	1	4	0	1	5	8	7	6	6	7	4	1.12708	0.191094	4.04723	0.456341	0.713818	3.92321	0	2.13542	2.76858	3.96075	3.06125	3.86365	2.06567	2.92724	1.80077	11
7794	TCEAL2	full-splice_match	alternative_3end	FALSE	429	152	727	316	204	87	117	78	161	303	467	281	435	175	65	120.879	29.0463	133.742	72.1019	145.619	85.3299	190.294	166.563	89.1484	150.013	204.229	180.947	149.761	73.181	29.2625	15
7800	ENSG00000291825	full-splice_match	alternative_5end	FALSE	2	5	7	7	2	0	0	0	4	0	3	7	0	0	0	0.563539	0.95547	1.28775	1.59719	1.42764	0	0	0	2.21487	0	1.31196	4.50759	0	0	0	6
7804	TCEAL6	full-splice_match	alternative_3end5end	FALSE	218	128	256	27	54	18	47	16	34	94	134	36	125	26	81	61.4258	24.46	47.095	6.16061	38.5462	17.6545	76.443	34.1668	18.8264	46.5388	58.601	23.1819	43.0349	10.8726	36.4656	15
7808	TCEAL6	incomplete-splice_match	5prime_fragment	FALSE	4	6	6	1	1	0	1	1	0	2	4	4	4	2	0	1.12708	1.14656	1.10379	0.228171	0.713818	0	1.62645	2.13542	0	0.990186	1.74928	2.57576	1.37712	0.836354	0	8
7812	BEX5	full-splice_match	alternative_3end	FALSE	240	111	194	110	36	50	22	25	65	133	171	87	120	120	184	67.6247	21.2114	35.6892	25.0988	25.6974	49.0402	35.7818	53.3856	35.9916	65.8474	74.7819	56.0229	41.3135	50.1813	82.8353	15
7813	BEX5	incomplete-splice_match	5prime_fragment	FALSE	278	53	152	51	18	24	19	20	21	52	143	80	65	123	62	78.332	10.128	27.9627	11.6367	12.8487	23.5393	30.9025	42.7085	11.628	25.7448	62.5369	51.5153	22.3781	51.4358	27.9119	15
7827	NKRF	full-splice_match	alternative_3end	FALSE	3	7	16	1	30	1	0	0	0	1	2	6	3	4	1	0.845309	1.33766	2.94344	0.228171	21.4145	0.980804	0	0	0	0.495093	0.874642	3.86365	1.03284	1.67271	0.450192	6
7830	CETN2	full-splice_match	reference_match	FALSE	32	60	78	76	10	0	12	1	27	67	40	15	61	38	19	9.01663	11.4656	14.3493	17.341	7.13818	0	19.5174	2.13542	14.9503	33.1712	17.4928	9.65912	21.001	15.8907	8.55365	14
7834	CETN2	incomplete-splice_match	5prime_fragment	FALSE	49	55	79	27	0	0	0	4	0	15	43	30	0	20	0	13.8067	10.5102	14.5332	6.16061	0	0	0	8.5417	0	7.4264	18.8048	19.3182	0	8.36354	0	9
7837	NSDHL	full-splice_match	alternative_3end5end	FALSE	23	62	46	67	0	0	0	0	0	0	0	0	0	0	0	6.4807	11.8478	8.46239	15.2874	0	0	0	0	0	0	0	0	0	0	0	4
7850	PQBP1	full-splice_match	reference_match	FALSE	54	10	23	116	30	1	0	14	46	4	0	46	5	10	45	15.2156	1.91094	4.23119	26.4678	21.4145	0.980804	0	29.8959	25.471	1.98037	0	29.6213	1.7214	4.18177	20.2586	12
7854	PQBP1	full-splice_match	reference_match	FALSE	8	42	67	9	2	23	19	0	1	14	72	2	3	9	1	2.25416	8.02595	12.3256	2.05354	1.42764	22.5585	30.9025	0	0.553717	6.9313	31.4871	1.28788	1.03284	3.76359	0.450192	12
7856	ENSG00000292216	full-splice_match	mono-exon	FALSE	1	6	3	10	1	0	0	0	4	0	2	3	4	0	5	0.28177	1.14656	0.551895	2.28171	0.713818	0	0	0	2.21487	0	0.874642	1.93182	1.37712	0	2.25096	6
7857	GRIPAP1	full-splice_match	alternative_3end	FALSE	1	0	4	1	0	0	2	2	1	0	4	1	0	6	0	0.28177	0	0.73586	0.228171	0	0	3.25289	4.27085	0.553717	0	1.74928	0.643941	0	2.50906	0	4
7867	SLC35A2	full-splice_match	reference_match	FALSE	32	36	25	12	0	0	1	0	16	0	0	6	4	16	3	9.01663	6.87939	4.59912	2.73805	0	0	1.62645	0	8.85947	0	0	3.86365	1.37712	6.69083	1.35058	10
7871	OTUD5	incomplete-splice_match	3prime_fragment	FALSE	74	16	16	29	5	0	0	0	139	185	0	0	302	0	0	20.851	3.05751	2.94344	6.61695	3.56909	0	0	0	76.9666	91.5922	0	0	103.972	0	0	8
7873	OTUD5	incomplete-splice_match	5prime_fragment	FALSE	3	5	1	2	1	0	0	0	3	2	4	3	4	1	3	0.845309	0.95547	0.183965	0.456341	0.713818	0	0	0	1.66115	0.990186	1.74928	1.93182	1.37712	0.418177	1.35058	5
7874	TIMM17B	full-splice_match	reference_match	FALSE	135	127	165	124	28	1	2	3	15	51	60	0	13	66	52	38.0389	24.269	30.3542	28.2932	19.9869	0.980804	3.25289	6.40627	8.30575	25.2497	26.2392	0	4.47563	27.5997	23.41	13
7875	TIMM17B	full-splice_match	reference_match	FALSE	13	11	15	5	0	1	0	0	0	0	0	0	0	0	1	3.66301	2.10204	2.75947	1.14085	0	0.980804	0	0	0	0	0	0	0	0	0.450192	4
7884	GRIPAP1	incomplete-splice_match	5prime_fragment	FALSE	7	12	31	8	4	1	1	1	0	4	6	3	7	6	0	1.97239	2.29313	5.70291	1.82536	2.85527	0.980804	1.62645	2.13542	0	1.98037	2.62392	1.93182	2.40995	2.50906	0	12
7887	CCDC120	full-splice_match	mono-exon	FALSE	5	29	18	36	30	15	3	6	16	16	32	16	41	6	44	1.40885	5.54173	3.31137	8.21414	21.4145	14.7121	4.87934	12.8125	8.85947	7.92149	13.9943	10.3031	14.1154	2.50906	19.8085	15
7888	PRAF2	full-splice_match	reference_match	FALSE	123	159	160	4	58	30	0	33	0	0	139	5	211	115	125	34.6577	30.384	29.4344	0.912682	41.4014	29.4241	0	70.469	0	0	60.7876	3.21971	72.6429	48.0904	56.274	11
7891	WDR45	full-splice_match	reference_match	FALSE	17	7	23	2	30	10	0	0	0	2	17	2	42	19	0	4.79008	1.33766	4.23119	0.456341	21.4145	9.80804	0	0	0	0.990186	7.43445	1.28788	14.4597	7.94537	0	9
7897	WDR45	full-splice_match	reference_match	FALSE	2	0	39	0	0	0	0	10	0	2	0	37	0	1	27	0.563539	0	7.17463	0	0	0	0	21.3542	0	0.990186	0	23.8258	0	0.418177	12.1552	4
7904	ENSG00000292220	full-splice_match	mono-exon	FALSE	11	4	9	2	3	4	3	3	4	1	6	5	3	4	3	3.09947	0.764376	1.65568	0.456341	2.14145	3.92321	4.87934	6.40627	2.21487	0.495093	2.62392	3.21971	1.03284	1.67271	1.35058	12
7906	GPKOW	full-splice_match	reference_match	FALSE	1	20	70	58	0	0	0	0	0	24	0	0	0	2	0	0.28177	3.82188	12.8775	13.2339	0	0	0	0	0	11.8822	0	0	0	0.836354	0	4
7915	TRMT1L	full-splice_match	alternative_3end5end	FALSE	25	0	5	2	1	0	0	1	3	0	1	34	105	0	1	7.04424	0	0.919825	0.456341	0.713818	0	0	2.13542	1.66115	0	0.437321	21.894	36.1493	0	0.450192	5
7917	TRMT1L	incomplete-splice_match	3prime_fragment	FALSE	2	27	11	25	20	0	0	0	0	0	0	1	8	1	6	0.563539	5.15954	2.02361	5.70426	14.2764	0	0	0	0	0	0	0.643941	2.75423	0.418177	2.70115	6
7923	TRMT1L	incomplete-splice_match	5prime_fragment	FALSE	10	13	21	19	0	0	0	0	0	0	1	0	0	0	0	2.8177	2.48422	3.86326	4.33524	0	0	0	0	0	0	0.437321	0	0	0	0	4
7926	TRMT1L	incomplete-splice_match	5prime_fragment	FALSE	11	5	5	4	0	1	1	1	0	1	4	0	5	1	4	3.09947	0.95547	0.919825	0.912682	0	0.980804	1.62645	2.13542	0	0.495093	1.74928	0	1.7214	0.418177	1.80077	6
7929	ENSG00000279838	full-splice_match	mono-exon	FALSE	6	4	5	7	4	7	2	2	2	3	1	3	7	5	2	1.69062	0.764376	0.919825	1.59719	2.85527	6.86563	3.25289	4.27085	1.10743	1.48528	0.437321	1.93182	2.40995	2.09089	0.900384	11
7930	IVNS1ABP	incomplete-splice_match	3prime_fragment	FALSE	3	0	58	124	0	3	0	0	63	21	0	1	87	0	70	0.845309	0	10.67	28.2932	0	2.94241	0	0	34.8841	10.397	0	0.643941	29.9523	0	31.5134	7
7931	IVNS1ABP	incomplete-splice_match	3prime_fragment	FALSE	29	0	1	0	0	13	4	0	0	65	0	1	9	47	22	8.17132	0	0.183965	0	0	12.7504	6.50579	0	0	32.1811	0	0.643941	3.09851	19.6543	9.90423	7
7933	IVNS1ABP	full-splice_match	alternative_3end5end	FALSE	3	553	8	0	7	68	0	3	105	0	33	8	30	40	3	0.845309	105.675	1.47172	0	4.99672	66.6947	0	6.40627	58.1402	0	14.4316	5.15153	10.3284	16.7271	1.35058	11
7942	IVNS1ABP	incomplete-splice_match	5prime_fragment	FALSE	4	12	9	4	0	0	0	0	2	0	1	1	0	4	0	1.12708	2.29313	1.65568	0.912682	0	0	0	0	1.10743	0	0.437321	0.643941	0	1.67271	0	5
7944	IVNS1ABP	incomplete-splice_match	5prime_fragment	FALSE	10	1	6	0	1	0	0	0	4	0	0	0	4	2	1	2.8177	0.191094	1.10379	0	0.713818	0	0	0	2.21487	0	0	0	1.37712	0.836354	0.450192	4
7946	IVNS1ABP	incomplete-splice_match	5prime_fragment	FALSE	32	105	44	30	8	14	2	0	22	7	8	8	21	30	16	9.01663	20.0649	8.09446	6.84512	5.71054	13.7313	3.25289	0	12.1818	3.46565	3.49857	5.15153	7.22986	12.5453	7.20307	14
7948	IVNS1ABP	incomplete-splice_match	5prime_fragment	FALSE	19	25	9	15	4	5	1	3	6	3	2	10	9	17	7	5.35362	4.77735	1.65568	3.42256	2.85527	4.90402	1.62645	6.40627	3.3223	1.48528	0.874642	6.43941	3.09851	7.10901	3.15134	14
7970	TPR	incomplete-splice_match	5prime_fragment	FALSE	4	9	4	1	3	2	0	0	1	0	1	0	0	1	4	1.12708	1.71985	0.73586	0.228171	2.14145	1.96161	0	0	0.553717	0	0.437321	0	0	0.418177	1.80077	5
7973	TPR	incomplete-splice_match	5prime_fragment	FALSE	9	11	29	0	0	4	0	0	4	0	0	0	0	0	0	2.53593	2.10204	5.33498	0	0	3.92321	0	0	2.21487	0	0	0	0	0	0	5
7975	TPR	incomplete-splice_match	5prime_fragment	FALSE	6	7	13	5	2	1	0	0	5	4	2	2	0	7	3	1.69062	1.33766	2.39154	1.14085	1.42764	0.980804	0	0	2.76858	1.98037	0.874642	1.28788	0	2.92724	1.35058	10
7977	TPR	incomplete-splice_match	3prime_fragment	FALSE	7	9	11	0	1	2	3	1	0	0	1	1	1	1	0	1.97239	1.71985	2.02361	0	0.713818	1.96161	4.87934	2.13542	0	0	0.437321	0.643941	0.344279	0.418177	0	6
7982	NMNAT2	novel_not_in_catalog	novel_exon	FALSE	2	3	2	0	4	0	0	0	0	3	14	4	3	0	42	0.563539	0.573282	0.36793	0	2.85527	0	0	0	0	1.48528	6.12249	2.57576	1.03284	0	18.9081	6
7991	ARPC5	full-splice_match	mono-exon	FALSE	1	16	4	3	1	1	1	1	10	2	11	5	8	0	7	0.28177	3.05751	0.73586	0.684512	0.713818	0.980804	1.62645	2.13542	5.53717	0.990186	4.81053	3.21971	2.75423	0	3.15134	8
7993	NMNAT2	incomplete-splice_match	5prime_fragment	FALSE	5	6	14	5	6	3	4	0	6	7	16	5	8	11	11	1.40885	1.14656	2.57551	1.14085	4.28291	2.94241	6.50579	0	3.3223	3.46565	6.99713	3.21971	2.75423	4.59995	4.95211	14
7997	COLGALT2	novel_not_in_catalog	novel_exon	FALSE	5	1	46	1	0	1	0	1	3	0	0	0	0	1	0	1.40885	0.191094	8.46239	0.228171	0	0.980804	0	2.13542	1.66115	0	0	0	0	0.418177	0	4
8001	NMNAT2	incomplete-splice_match	5prime_fragment	FALSE	3	3	3	1	1	1	1	0	0	1	3	2	2	8	3	0.845309	0.573282	0.551895	0.228171	0.713818	0.980804	1.62645	0	0	0.495093	1.31196	1.28788	0.688558	3.34542	1.35058	5
8012	COLGALT2	incomplete-splice_match	5prime_fragment	FALSE	12	4	10	22	2	5	3	1	2	1	2	2	0	0	0	3.38124	0.764376	1.83965	5.01975	1.42764	4.90402	4.87934	2.13542	1.10743	0.495093	0.874642	1.28788	0	0	0	9
8013	COLGALT2	novel_not_in_catalog	Alt5	FALSE	3	7	7	2	1	3	0	0	1	4	2	2	6	3	1	0.845309	1.33766	1.28775	0.456341	0.713818	2.94241	0	0	0.553717	1.98037	0.874642	1.28788	2.06567	1.25453	0.450192	7
8017	COLGALT2	incomplete-splice_match	5prime_fragment	FALSE	8	1	13	14	5	2	1	3	3	5	6	2	0	3	10	2.25416	0.191094	2.39154	3.19439	3.56909	1.96161	1.62645	6.40627	1.66115	2.47547	2.62392	1.28788	0	1.25453	4.50192	13
8018	COLGALT2	novel_not_in_catalog	Alt5	FALSE	5	10	4	8	0	0	1	0	10	1	0	5	2	3	3	1.40885	1.91094	0.73586	1.82536	0	0	1.62645	0	5.53717	0.495093	0	3.21971	0.688558	1.25453	1.35058	8
8019	COLGALT2	novel_not_in_catalog	Alt5	FALSE	8	3	5	3	5	0	0	1	4	0	2	11	2	2	0	2.25416	0.573282	0.919825	0.684512	3.56909	0	0	2.13542	2.21487	0	0.874642	7.08335	0.688558	0.836354	0	5
8020	COLGALT2	incomplete-splice_match	5prime_fragment	FALSE	22	7	14	4	7	10	3	3	12	3	6	4	7	5	2	6.19893	1.33766	2.57551	0.912682	4.99672	9.80804	4.87934	6.40627	6.6446	1.48528	2.62392	2.57576	2.40995	2.09089	0.900384	13
8026	C1orf21-DT	full-splice_match	mono-exon	FALSE	4	1	9	0	2	2	1	1	2	2	3	3	2	3	9	1.12708	0.191094	1.65568	0	1.42764	1.96161	1.62645	2.13542	1.10743	0.990186	1.31196	1.93182	0.688558	1.25453	4.05173	11
8039	EDEM3	incomplete-splice_match	5prime_fragment	FALSE	2	6	3	0	1	0	0	1	7	2	9	0	2	17	3	0.563539	1.14656	0.551895	0	0.713818	0	0	2.13542	3.87602	0.990186	3.93589	0	0.688558	7.10901	1.35058	6
8046	EDEM3	incomplete-splice_match	5prime_fragment	FALSE	1	23	4	0	0	3	0	0	2	0	3	6	1	6	9	0.28177	4.39516	0.73586	0	0	2.94241	0	0	1.10743	0	1.31196	3.86365	0.344279	2.50906	4.05173	7
8055	HP1BP3	incomplete-splice_match	5prime_fragment	FALSE	4	0	27	17	0	2	0	0	5	9	0	5	0	3	2	1.12708	0	4.96705	3.8789	0	1.96161	0	0	2.76858	4.45584	0	3.21971	0	1.25453	0.900384	8
8056	HP1BP3	incomplete-splice_match	5prime_fragment	FALSE	24	26	14	0	6	0	0	3	0	18	0	8	7	5	0	6.76247	4.96845	2.57551	0	4.28291	0	0	6.40627	0	8.91168	0	5.15153	2.40995	2.09089	0	9
8059	HP1BP3	incomplete-splice_match	5prime_fragment	FALSE	16	24	34	18	2	3	7	5	7	10	14	12	11	7	5	4.50831	4.58626	6.25481	4.10707	1.42764	2.94241	11.3851	10.6771	3.87602	4.95093	6.12249	7.72729	3.78707	2.92724	2.25096	15
8064	HP1BP3	incomplete-splice_match	5prime_fragment	FALSE	2	7	8	1	2	1	1	0	2	3	3	3	4	1	3	0.563539	1.33766	1.47172	0.228171	1.42764	0.980804	1.62645	0	1.10743	1.48528	1.31196	1.93182	1.37712	0.418177	1.35058	10
8065	HP1BP3	incomplete-splice_match	5prime_fragment	FALSE	1	4	8	1	2	0	1	0	0	0	0	1	5	0	0	0.28177	0.764376	1.47172	0.228171	1.42764	0	1.62645	0	0	0	0	0.643941	1.7214	0	0	4
8068	HP1BP3	incomplete-splice_match	5prime_fragment	FALSE	166	342	223	187	90	88	25	28	79	54	74	117	111	129	103	46.7738	65.3542	41.0242	42.6679	64.2436	86.3107	40.6612	59.7919	43.7436	26.735	32.3617	75.3411	38.215	53.9449	46.3698	15
8069	HP1BP3	novel_in_catalog	combination_of_known_junctions	FALSE	22	87	25	49	4	6	1	4	1	0	22	10	26	4	0	6.19893	16.6252	4.59912	11.1804	2.85527	5.88482	1.62645	8.5417	0.553717	0	9.62106	6.43941	8.95126	1.67271	0	12
8070	HP1BP3	incomplete-splice_match	3prime_fragment	FALSE	5	3	11	6	0	3	0	1	5	0	3	0	3	3	5	1.40885	0.573282	2.02361	1.36902	0	2.94241	0	2.13542	2.76858	0	1.31196	0	1.03284	1.25453	2.25096	10
8073	HP1BP3	incomplete-splice_match	5prime_fragment	FALSE	26	103	66	40	75	21	10	7	37	31	33	16	31	57	32	7.32601	19.6827	12.1417	9.12682	53.5363	20.5969	16.2645	14.948	20.4875	15.3479	14.4316	10.3031	10.6727	23.8361	14.4061	15
8075	HP1BP3	incomplete-splice_match	5prime_fragment	FALSE	12	103	44	42	16	5	1	10	7	3	7	9	11	49	22	3.38124	19.6827	8.09446	9.58316	11.4211	4.90402	1.62645	21.3542	3.87602	1.48528	3.06125	5.79547	3.78707	20.4907	9.90423	15
8076	HP1BP3	incomplete-splice_match	5prime_fragment	FALSE	4	136	27	30	5	4	3	0	8	0	12	0	2	16	34	1.12708	25.9888	4.96705	6.84512	3.56909	3.92321	4.87934	0	4.42973	0	5.24785	0	0.688558	6.69083	15.3065	11
8077	HP1BP3	novel_in_catalog	combination_of_known_splicesites	FALSE	10	36	44	15	7	4	0	0	8	3	5	11	4	5	1	2.8177	6.87939	8.09446	3.42256	4.99672	3.92321	0	0	4.42973	1.48528	2.1866	7.08335	1.37712	2.09089	0.450192	12
8082	HP1BP3	incomplete-splice_match	5prime_fragment	FALSE	1	2	1	1	1	3	0	0	3	4	0	3	4	1	2	0.28177	0.382188	0.183965	0.228171	0.713818	2.94241	0	0	1.66115	1.98037	0	1.93182	1.37712	0.418177	0.900384	5
8083	UBR4	incomplete-splice_match	internal_fragment	FALSE	4	0	0	0	0	3	0	0	0	0	5	4	13	0	0	1.12708	0	0	0	0	2.94241	0	0	0	0	2.1866	2.57576	4.47563	0	0	5
8084	HP1BP3	incomplete-splice_match	5prime_fragment	FALSE	3	0	1	1	4	2	1	0	0	0	7	2	0	3	2	0.845309	0	0.183965	0.228171	2.85527	1.96161	1.62645	0	0	0	3.06125	1.28788	0	1.25453	0.900384	6
8085	HP1BP3	incomplete-splice_match	5prime_fragment	FALSE	2	1	0	2	1	1	1	1	2	0	1	0	2	2	19	0.563539	0.191094	0	0.456341	0.713818	0.980804	1.62645	2.13542	1.10743	0	0.437321	0	0.688558	0.836354	8.55365	4
8088	EIF4G3	incomplete-splice_match	3prime_fragment	FALSE	72	0	62	340	14	22	0	0	99	163	7	23	27	5	0	20.2874	0	11.4058	77.578	9.99345	21.5777	0	0	54.8179	80.7002	3.06125	14.8106	9.29554	2.09089	0	11
8089	EIF4G3	incomplete-splice_match	3prime_fragment	FALSE	16	3	18	93	64	26	19	6	0	12	2	81	235	1	30	4.50831	0.573282	3.31137	21.2199	45.6843	25.5009	30.9025	12.8125	0	5.94112	0.874642	52.1592	80.9056	0.418177	13.5058	11
8090	EIF4G3	incomplete-splice_match	3prime_fragment	FALSE	32	191	1	0	0	0	15	0	5	28	53	17	1	64	102	9.01663	36.499	0.183965	0	0	0	24.3967	0	2.76858	13.8626	23.178	10.947	0.344279	26.7633	45.9196	9
8091	EIF4G3	incomplete-splice_match	3prime_fragment	FALSE	129	4	3	0	0	0	0	9	0	25	103	0	58	0	0	36.3483	0.764376	0.551895	0	0	0	0	19.2188	0	12.3773	45.044	0	19.9682	0	0	5
8093	EIF4G3	incomplete-splice_match	3prime_fragment	FALSE	2	69	4	3	75	1	0	9	111	67	20	49	1	0	45	0.563539	13.1855	0.73586	0.684512	53.5363	0.980804	0	19.2188	61.4625	33.1712	8.74642	31.5531	0.344279	0	20.2586	8
8109	EIF4G3	incomplete-splice_match	3prime_fragment	FALSE	3	1	4	40	1	0	0	2	0	1	4	1	3	0	1	0.845309	0.191094	0.73586	9.12682	0.713818	0	0	4.27085	0	0.495093	1.74928	0.643941	1.03284	0	0.450192	4
8110	EIF4G3	incomplete-splice_match	internal_fragment	FALSE	3	0	0	24	0	0	0	1	2	0	0	3	0	5	0	0.845309	0	0	5.47609	0	0	0	2.13542	1.10743	0	0	1.93182	0	2.09089	0	5
8116	UBR4	incomplete-splice_match	internal_fragment	FALSE	1	2	0	1	0	0	1	1	0	0	3	1	0	0	6	0.28177	0.382188	0	0.228171	0	0	1.62645	2.13542	0	0	1.31196	0.643941	0	0	2.70115	4
8134	RPS15AP6	full-splice_match	mono-exon	FALSE	11	11	8	87	5	1	1	1	7	15	4	4	2	3	1	3.09947	2.10204	1.47172	19.8508	3.56909	0.980804	1.62645	2.13542	3.87602	7.4264	1.74928	2.57576	0.688558	1.25453	0.450192	12
8138	EIF4G3	incomplete-splice_match	intron_retention	FALSE	2	2	2	0	0	3	2	2	1	1	4	1	6	2	3	0.563539	0.382188	0.36793	0	0	2.94241	3.25289	4.27085	0.553717	0.495093	1.74928	0.643941	2.06567	0.836354	1.35058	6
8142	UBR4	incomplete-splice_match	5prime_fragment	FALSE	3	2	7	2	0	0	1	0	0	3	1	0	1	3	2	0.845309	0.382188	1.28775	0.456341	0	0	1.62645	0	0	1.48528	0.437321	0	0.344279	1.25453	0.900384	4
8143	UBR4	incomplete-splice_match	5prime_fragment	FALSE	5	17	8	7	1	4	1	2	2	2	5	5	4	7	2	1.40885	3.2486	1.47172	1.59719	0.713818	3.92321	1.62645	4.27085	1.10743	0.990186	2.1866	3.21971	1.37712	2.92724	0.900384	12
8145	UBR4	incomplete-splice_match	5prime_fragment	FALSE	2	3	2	2	2	4	2	1	1	1	1	0	1	4	1	0.563539	0.573282	0.36793	0.456341	1.42764	3.92321	3.25289	2.13542	0.553717	0.495093	0.437321	0	0.344279	1.67271	0.450192	5
8146	EIF4G3	full-splice_match	alternative_3end5end	FALSE	11	2	4	1	2	4	2	0	1	1	1	5	5	9	3	3.09947	0.382188	0.73586	0.228171	1.42764	3.92321	3.25289	0	0.553717	0.495093	0.437321	3.21971	1.7214	3.76359	1.35058	8
8154	RAP1GAP	incomplete-splice_match	3prime_fragment	FALSE	7	1	3	2	13	4	1	0	0	0	2	1	0	0	3	1.97239	0.191094	0.551895	0.456341	9.27963	3.92321	1.62645	0	0	0	0.874642	0.643941	0	0	1.35058	5
8159	RAP1GAP	incomplete-splice_match	5prime_fragment	FALSE	5	2	3	1	2	0	1	0	0	1	3	1	4	3	6	1.40885	0.382188	0.551895	0.228171	1.42764	0	1.62645	0	0	0.495093	1.31196	0.643941	1.37712	1.25453	2.70115	7
8162	USP48	incomplete-splice_match	3prime_fragment	FALSE	5	5	0	5	5	0	0	0	2	1	0	178	2	2	1	1.40885	0.95547	0	1.14085	3.56909	0	0	0	1.10743	0.495093	0	114.622	0.688558	0.836354	0.450192	5
8169	USP48	full-splice_match	alternative_3end5end	FALSE	1	1	2	22	1	1	131	0	120	1	9	0	0	1	23	0.28177	0.191094	0.36793	5.01975	0.713818	0.980804	213.065	0	66.446	0.495093	3.93589	0	0	0.418177	10.3544	5
8170	USP48	incomplete-splice_match	3prime_fragment	FALSE	1	0	16	5	0	0	0	0	13	2	0	0	0	146	0	0.28177	0	2.94344	1.14085	0	0	0	0	7.19832	0.990186	0	0	0	61.0539	0	4
8186	USP48	incomplete-splice_match	5prime_fragment	FALSE	5	9	11	9	2	0	0	0	0	0	1	0	0	0	0	1.40885	1.71985	2.02361	2.05354	1.42764	0	0	0	0	0	0.437321	0	0	0	0	5
8188	EMC1	full-splice_match	alternative_5end	FALSE	28	0	43	64	2	4	0	0	0	66	0	0	2	0	0	7.88955	0	7.91049	14.6029	1.42764	3.92321	0	0	0	32.6761	0	0	0.688558	0	0	6
8189	USP48	incomplete-splice_match	5prime_fragment	FALSE	4	5	4	8	0	0	0	0	4	4	0	1	0	5	2	1.12708	0.95547	0.73586	1.82536	0	0	0	0	2.21487	1.98037	0	0.643941	0	2.09089	0.900384	5
8192	EMC1	incomplete-splice_match	3prime_fragment	FALSE	4	44	0	0	2	0	0	0	23	0	0	0	0	0	0	1.12708	8.40814	0	0	1.42764	0	0	0	12.7355	0	0	0	0	0	0	4
8195	USP48	incomplete-splice_match	5prime_fragment	FALSE	15	31	20	16	7	4	0	1	0	4	6	6	6	1	7	4.22655	5.92392	3.6793	3.65073	4.99672	3.92321	0	2.13542	0	1.98037	2.62392	3.86365	2.06567	0.418177	3.15134	12
8197	USP48	incomplete-splice_match	5prime_fragment	FALSE	11	8	11	3	2	3	2	2	1	3	0	1	2	5	5	3.09947	1.52875	2.02361	0.684512	1.42764	2.94241	3.25289	4.27085	0.553717	1.48528	0	0.643941	0.688558	2.09089	2.25096	10
8198	EMC1	full-splice_match	alternative_3end5end	FALSE	1	46	0	35	0	0	0	0	0	0	26	16	57	0	0	0.28177	8.79033	0	7.98597	0	0	0	0	0	0	11.3703	10.3031	19.6239	0	0	5
8199	USP48	incomplete-splice_match	intron_retention	FALSE	35	54	53	30	10	11	4	8	10	5	13	13	16	18	15	9.86194	10.3191	9.75014	6.84512	7.13818	10.7888	6.50579	17.0834	5.53717	2.47547	5.68517	8.37123	5.50847	7.52719	6.75288	15
8201	USP48	full-splice_match	alternative_3end5end	FALSE	5	5	117	3	2	1	0	16	6	0	1	51	0	39	4	1.40885	0.95547	21.5239	0.684512	1.42764	0.980804	0	34.1668	3.3223	0	0.437321	32.841	0	16.3089	1.80077	8
8212	EMC1	incomplete-splice_match	5prime_fragment	FALSE	8	5	5	2	4	1	1	0	5	8	2	3	8	8	4	2.25416	0.95547	0.919825	0.456341	2.85527	0.980804	1.62645	0	2.76858	3.96075	0.874642	1.93182	2.75423	3.34542	1.80077	9
8214	LUZP1	incomplete-splice_match	3prime_fragment	FALSE	12	0	0	2	14	2	0	0	1	0	2	3	0	0	14	3.38124	0	0	0.456341	9.99345	1.96161	0	0	0.553717	0	0.874642	1.93182	0	0	6.30269	5
8215	LUZP1	incomplete-splice_match	3prime_fragment	FALSE	27	51	1	38	28	8	16	9	7	36	29	41	102	22	38	7.60778	9.7458	0.183965	8.67048	19.9869	7.84643	26.0232	19.2188	3.87602	17.8234	12.6823	26.4016	35.1165	9.1999	17.1073	14
8216	LUZP1	novel_in_catalog	combination_of_known_splicesites	FALSE	5	0	2	6	2	8	0	0	0	1	0	0	2	0	1	1.40885	0	0.36793	1.36902	1.42764	7.84643	0	0	0	0.495093	0	0	0.688558	0	0.450192	4
8218	LUZP1	full-splice_match	alternative_3end5end	FALSE	27	0	112	0	35	0	0	0	0	3	0	0	0	0	0	7.60778	0	20.6041	0	24.9836	0	0	0	0	1.48528	0	0	0	0	0	4
8224	ENSG00000289014	full-splice_match	mono-exon	FALSE	5	3	4	0	1	1	1	0	3	2	3	3	3	0	12	1.40885	0.573282	0.73586	0	0.713818	0.980804	1.62645	0	1.66115	0.990186	1.31196	1.93182	1.03284	0	5.40231	7
8227	LINC01355	full-splice_match	mono-exon	FALSE	27	61	37	60	27	25	11	13	28	28	37	24	36	39	71	7.60778	11.6567	6.8067	13.6902	19.2731	24.5201	17.8909	27.7605	15.5041	13.8626	16.1809	15.4546	12.394	16.3089	31.9636	15
8235	HNRNPR	novel_in_catalog	combination_of_known_junctions	FALSE	6	8	8	3	0	0	0	0	0	0	0	0	4	2	0	1.69062	1.52875	1.47172	0.684512	0	0	0	0	0	0	0	0	1.37712	0.836354	0	4
8237	HNRNPR	novel_in_catalog	combination_of_known_junctions	FALSE	5	8	14	0	0	0	0	0	0	0	5	0	3	1	1	1.40885	1.52875	2.57551	0	0	0	0	0	0	0	2.1866	0	1.03284	0.418177	0.450192	5
8240	HNRNPR	incomplete-splice_match	5prime_fragment	FALSE	3	7	14	0	0	0	0	0	0	4	6	0	0	0	0	0.845309	1.33766	2.57551	0	0	0	0	0	0	1.98037	2.62392	0	0	0	0	4
8243	HNRNPR	incomplete-splice_match	5prime_fragment	FALSE	23	7	24	20	1	0	0	1	15	0	1	0	0	2	19	6.4807	1.33766	4.41516	4.56341	0.713818	0	0	2.13542	8.30575	0	0.437321	0	0	0.836354	8.55365	7
8246	HNRNPR	incomplete-splice_match	5prime_fragment	FALSE	13	9	18	7	3	4	1	1	6	5	3	7	4	6	5	3.66301	1.71985	3.31137	1.59719	2.14145	3.92321	1.62645	2.13542	3.3223	2.47547	1.31196	4.50759	1.37712	2.50906	2.25096	15
8247	HNRNPR	full-splice_match	alternative_3end	FALSE	6	1	8	3	1	2	2	0	0	0	0	1	1	1	1	1.69062	0.191094	1.47172	0.684512	0.713818	1.96161	3.25289	0	0	0	0	0.643941	0.344279	0.418177	0.450192	4
8252	ID3	full-splice_match	reference_match	FALSE	26	77	144	72	13	5	0	3	20	7	28	4	107	29	13	7.32601	14.7142	26.4909	16.4283	9.27963	4.90402	0	6.40627	11.0743	3.46565	12.245	2.57576	36.8379	12.1271	5.8525	14
8257	ELOA-AS1	full-splice_match	reference_match	FALSE	8	6	17	16	4	0	1	0	5	0	8	2	9	5	5	2.25416	1.14656	3.1274	3.65073	2.85527	0	1.62645	0	2.76858	0	3.49857	1.28788	3.09851	2.09089	2.25096	12
8265	ENSG00000289835	full-splice_match	reference_match	FALSE	1	2	6	0	0	0	6	5	0	2	0	0	2	1	4	0.28177	0.382188	1.10379	0	0	0	9.75868	10.6771	0	0.990186	0	0	0.688558	0.418177	1.80077	4
8271	AKR7A2	full-splice_match	reference_match	FALSE	83	220	182	107	18	17	0	0	55	74	34	36	80	85	35	23.3869	42.0407	33.4816	24.4143	12.8487	16.6737	0	0	30.4544	36.6369	14.8689	23.1819	27.5423	35.5451	15.7567	13
8272	GALE	full-splice_match	alternative_3end	FALSE	7	2	9	4	1	1	0	3	6	2	12	7	9	3	14	1.97239	0.382188	1.65568	0.912682	0.713818	0.980804	0	6.40627	3.3223	0.990186	5.24785	4.50759	3.09851	1.25453	6.30269	9
8273	GALE	incomplete-splice_match	5prime_fragment	FALSE	3	3	6	9	1	3	0	0	0	5	1	0	5	1	3	0.845309	0.573282	1.10379	2.05354	0.713818	2.94241	0	0	0	2.47547	0.437321	0	1.7214	0.418177	1.35058	6
8275	HMGCL	full-splice_match	reference_match	FALSE	118	9	16	1	0	0	0	0	0	3	51	80	0	3	57	33.2488	1.71985	2.94344	0.228171	0	0	0	0	0	1.48528	22.3034	51.5153	0	1.25453	25.6609	8
8287	HMGCL	incomplete-splice_match	5prime_fragment	FALSE	8	2	35	9	2	0	1	1	6	4	8	11	6	9	0	2.25416	0.382188	6.43877	2.05354	1.42764	0	1.62645	2.13542	3.3223	1.98037	3.49857	7.08335	2.06567	3.76359	0	12
8289	FUCA1	full-splice_match	reference_match	FALSE	29	41	65	0	0	0	22	0	1	0	0	0	0	0	0	8.17132	7.83486	11.9577	0	0	0	35.7818	0	0.553717	0	0	0	0	0	0	4
8297	SRSF10	full-splice_match	alternative_3end5end	FALSE	5	2	5	0	0	0	0	2	0	0	3	1	6	0	4	1.40885	0.382188	0.919825	0	0	0	0	4.27085	0	0	1.31196	0.643941	2.06567	0	1.80077	5
8298	SRSF10	novel_in_catalog	combination_of_known_junctions	FALSE	4	6	3	0	2	0	0	0	3	3	0	1	0	1	6	1.12708	1.14656	0.551895	0	1.42764	0	0	0	1.66115	1.48528	0	0.643941	0	0.418177	2.70115	6
8300	SRSF10	incomplete-splice_match	5prime_fragment	FALSE	30	44	26	17	22	22	3	3	12	15	15	12	26	28	35	8.45309	8.40814	4.78309	3.8789	15.704	21.5777	4.87934	6.40627	6.6446	7.4264	6.55981	7.72729	8.95126	11.709	15.7567	15
8301	SRSF10	full-splice_match	alternative_3end	FALSE	128	174	194	83	18	47	18	21	35	27	36	48	40	47	44	36.0665	33.2504	35.6892	18.9382	12.8487	46.0978	29.2761	44.8439	19.3801	13.3675	15.7435	30.9092	13.7712	19.6543	19.8085	15
8302	CAPZB	full-splice_match	reference_match	FALSE	393	132	586	3	10	4	24	2	404	83	64	71	139	342	14	110.735	25.2244	107.803	0.684512	7.13818	3.92321	39.0347	4.27085	223.702	41.0927	27.9885	45.7198	47.8548	143.017	6.30269	14
8307	STPG1	incomplete-splice_match	5prime_fragment	FALSE	2	2	4	2	3	5	1	0	1	1	1	0	9	3	0	0.563539	0.382188	0.73586	0.456341	2.14145	4.90402	1.62645	0	0.553717	0.495093	0.437321	0	3.09851	1.25453	0	5
8309	STPG1	incomplete-splice_match	5prime_fragment	FALSE	23	21	25	9	9	12	2	1	7	3	14	11	16	6	8	6.4807	4.01298	4.59912	2.05354	6.42436	11.7696	3.25289	2.13542	3.87602	1.48528	6.12249	7.08335	5.50847	2.50906	3.60154	15
8312	STPG1	novel_in_catalog	combination_of_known_splicesites	FALSE	1	2	4	6	5	0	1	0	2	1	1	3	2	2	0	0.28177	0.382188	0.73586	1.36902	3.56909	0	1.62645	0	1.10743	0.495093	0.437321	1.93182	0.688558	0.836354	0	5
8314	CAPZB	full-splice_match	reference_match	FALSE	34	614	171	1005	4	1	0	0	29	8	2	7	6	58	0	9.58017	117.332	31.458	229.311	2.85527	0.980804	0	0	16.0578	3.96075	0.874642	4.50759	2.06567	24.2543	0	10
8323	CAPZB	incomplete-splice_match	3prime_fragment	FALSE	7	11	5	6	1	0	0	0	0	1	1	0	773	0	0	1.97239	2.10204	0.919825	1.36902	0.713818	0	0	0	0	0.495093	0.437321	0	266.128	0	0	4
8328	SYF2	full-splice_match	alternative_3end	FALSE	129	272	217	245	61	39	3	35	115	52	125	107	57	177	48	36.3483	51.9776	39.9204	55.9018	43.5429	38.2513	4.87934	74.7399	63.6774	25.7448	54.6651	68.9017	19.6239	74.0174	21.6092	15
8331	SYF2	incomplete-splice_match	5prime_fragment	FALSE	9	7	15	0	4	3	1	0	3	0	7	6	3	5	1	2.53593	1.33766	2.75947	0	2.85527	2.94241	1.62645	0	1.66115	0	3.06125	3.86365	1.03284	2.09089	0.450192	11
8333	SYF2	incomplete-splice_match	5prime_fragment	FALSE	13	7	8	2	1	1	3	1	2	1	2	2	2	4	0	3.66301	1.33766	1.47172	0.456341	0.713818	0.980804	4.87934	2.13542	1.10743	0.495093	0.874642	1.28788	0.688558	1.67271	0	8
8335	SYF2	incomplete-splice_match	5prime_fragment	FALSE	206	155	222	93	48	39	12	13	65	47	112	123	92	96	46	58.0446	29.6196	40.8402	21.2199	34.2632	38.2513	19.5174	27.7605	35.9916	23.2694	48.9799	79.2048	31.6737	40.145	20.7088	15
8336	CAPZB	incomplete-splice_match	3prime_fragment	FALSE	2	0	1	1	0	0	0	3	2	7	8	5	2	8	1	0.563539	0	0.183965	0.228171	0	0	0	6.40627	1.10743	3.46565	3.49857	3.21971	0.688558	3.34542	0.450192	6
8337	SYF2	full-splice_match	reference_match	FALSE	3	2	4	1	2	1	1	0	1	1	1	0	5	6	0	0.845309	0.382188	0.73586	0.228171	1.42764	0.980804	1.62645	0	0.553717	0.495093	0.437321	0	1.7214	2.50906	0	4
8338	SYF2	full-splice_match	alternative_3end	FALSE	3	3	8	1	0	0	0	2	3	1	8	4	1	1	1	0.845309	0.573282	1.47172	0.228171	0	0	0	4.27085	1.66115	0.495093	3.49857	2.57576	0.344279	0.418177	0.450192	5
8339	RSRP1	full-splice_match	reference_match	FALSE	48	900	710	113	21	352	0	0	21	20	570	16	70	390	36	13.5249	171.985	130.615	25.7833	14.9902	345.243	0	0	11.628	9.90186	249.273	10.3031	24.0995	163.089	16.2069	13
8346	RSRP1	incomplete-splice_match	intron_retention	FALSE	15	79	20	111	5	428	617	11	514	478	45	514	684	40	927	4.22655	15.0964	3.6793	25.3269	3.56909	419.784	1003.52	23.4897	284.61	236.655	19.6794	330.986	235.487	16.7271	417.328	15
8348	RSRP1	incomplete-splice_match	3prime_fragment	FALSE	1	1	0	6	351	0	3	1	0	0	0	0	0	1	0	0.28177	0.191094	0	1.36902	250.55	0	4.87934	2.13542	0	0	0	0	0	0.418177	0	4
8351	RSRP1	incomplete-splice_match	5prime_fragment	FALSE	15	18	22	13	4	14	0	3	3	0	3	3	6	2	6	4.22655	3.43969	4.04723	2.96622	2.85527	13.7313	0	6.40627	1.66115	0	1.31196	1.93182	2.06567	0.836354	2.70115	12
8352	RSRP1	full-splice_match	reference_match	FALSE	243	464	417	259	5	73	16	21	148	24	89	101	274	19	23	68.47	88.6677	76.7134	59.0962	3.56909	71.5987	26.0232	44.8439	81.9501	11.8822	38.9215	65.0381	94.3325	7.94537	10.3544	15
8354	RSRP1	novel_in_catalog	combination_of_known_junctions,intron_retention	FALSE	14	4	33	2	0	5	0	0	2	0	0	0	0	0	0	3.94478	0.764376	6.07084	0.456341	0	4.90402	0	0	1.10743	0	0	0	0	0	0	4
8357	RSRP1	incomplete-splice_match	5prime_fragment	FALSE	33	40	29	9	7	9	17	7	5	9	19	8	21	13	14	9.2984	7.64376	5.33498	2.05354	4.99672	8.82723	27.6496	14.948	2.76858	4.45584	8.30909	5.15153	7.22986	5.4363	6.30269	15
8370	CAPZB	incomplete-splice_match	5prime_fragment	FALSE	30	11	31	1	4	2	0	0	2	0	4	6	10	11	2	8.45309	2.10204	5.70291	0.228171	2.85527	1.96161	0	0	1.10743	0	1.74928	3.86365	3.44279	4.59995	0.900384	10
8373	ENSG00000272084	full-splice_match	mono-exon	FALSE	20	8	12	13	10	149	6	11	3	10	12	7	20	13	18	5.63539	1.52875	2.20758	2.96622	7.13818	146.14	9.75868	23.4897	1.66115	4.95093	5.24785	4.50759	6.88558	5.4363	8.10346	15
8377	ENSG00000228172	full-splice_match	mono-exon	FALSE	4	4	3	3	1	4	1	0	4	5	0	3	4	2	6	1.12708	0.764376	0.551895	0.684512	0.713818	3.92321	1.62645	0	2.21487	2.47547	0	1.93182	1.37712	0.836354	2.70115	8
8381	STMN1	full-splice_match	reference_match	FALSE	4130	6285	4721	3369	628	467	506	358	2774	2916	2498	1450	1008	2511	2279	1163.71	1201.03	868.498	768.707	448.277	458.035	822.982	764.482	1536.01	1443.69	1092.43	933.715	347.033	1050.04	1025.99	15
8382	STMN1	incomplete-splice_match	3prime_fragment	FALSE	14	20	26	13	4	19	3	3	14	0	8	3	8	8	14	3.94478	3.82188	4.78309	2.96622	2.85527	18.6353	4.87934	6.40627	7.75203	0	3.49857	1.93182	2.75423	3.34542	6.30269	14
8383	STMN1	incomplete-splice_match	3prime_fragment	FALSE	7	15	2284	7	1	0	1	0	6	24	3	2	1210	11	5	1.97239	2.86641	420.176	1.59719	0.713818	0	1.62645	0	3.3223	11.8822	1.31196	1.28788	416.578	4.59995	2.25096	12
8385	STMN1	incomplete-splice_match	5prime_fragment	FALSE	1024	776	1166	670	111	62	94	45	208	169	413	273	252	201	175	288.532	148.289	214.503	152.874	79.2338	60.8098	152.886	96.0941	115.173	83.6707	180.613	175.796	86.7583	84.0536	78.7836	15
8390	STMN1	incomplete-splice_match	3prime_fragment	FALSE	12	16	9	5	0	2	1	0	4	3	1	0	12	6	0	3.38124	3.05751	1.65568	1.14085	0	1.96161	1.62645	0	2.21487	1.48528	0.437321	0	4.13135	2.50906	0	10
8414	STMN1	incomplete-splice_match	5prime_fragment	FALSE	309	245	365	204	39	41	39	24	140	54	125	122	132	114	119	87.0668	46.8181	67.1472	46.5468	27.8389	40.213	63.4314	51.2502	77.5203	26.735	54.6651	78.5608	45.4448	47.6722	53.5729	15
8418	STMN1	incomplete-splice_match	5prime_fragment	FALSE	8	1	4	3	1	5	1	1	0	0	0	3	0	0	5	2.25416	0.191094	0.73586	0.684512	0.713818	4.90402	1.62645	2.13542	0	0	0	1.93182	0	0	2.25096	6
8434	CAPZB	incomplete-splice_match	5prime_fragment	FALSE	3	0	8	0	3	1	0	1	2	3	3	4	0	2	0	0.845309	0	1.47172	0	2.14145	0.980804	0	2.13542	1.10743	1.48528	1.31196	2.57576	0	0.836354	0	7
8443	GPN2	full-splice_match	alternative_3end	FALSE	14	15	15	50	10	0	0	0	0	37	0	0	29	0	0	3.94478	2.86641	2.75947	11.4085	7.13818	0	0	0	0	18.3184	0	0	9.98409	0	0	7
8444	ENSG00000289554	full-splice_match	mono-exon	FALSE	1	5	2	4	0	1	1	1	2	1	3	1	7	3	7	0.28177	0.95547	0.36793	0.912682	0	0.980804	1.62645	2.13542	1.10743	0.495093	1.31196	0.643941	2.40995	1.25453	3.15134	7
8445	GPATCH3	full-splice_match	alternative_5end	FALSE	38	44	0	0	9	0	0	0	0	0	0	0	0	44	0	10.7072	8.40814	0	0	6.42436	0	0	0	0	0	0	0	0	18.3998	0	4
8447	UBR4	incomplete-splice_match	3prime_fragment	FALSE	5	257	0	1	0	0	75	0	0	0	281	0	489	0	0	1.40885	49.1112	0	0.228171	0	0	121.984	0	0	0	122.887	0	168.352	0	0	5
8448	CAPZB	incomplete-splice_match	5prime_fragment	FALSE	23	17	34	1	3	5	3	3	5	9	15	15	18	8	7	6.4807	3.2486	6.25481	0.228171	2.14145	4.90402	4.87934	6.40627	2.76858	4.45584	6.55981	9.65912	6.19702	3.34542	3.15134	14
8454	MAP3K6	incomplete-splice_match	3prime_fragment	FALSE	1	0	1	0	2	3	0	0	2	0	2	2	0	0	1	0.28177	0	0.183965	0	1.42764	2.94241	0	0	1.10743	0	0.874642	1.28788	0	0	0.450192	4
8459	WASF2	incomplete-splice_match	5prime_fragment	FALSE	24	22	11	46	3	2	2	0	0	0	4	11	6	1	0	6.76247	4.20407	2.02361	10.4958	2.14145	1.96161	3.25289	0	0	0	1.74928	7.08335	2.06567	0.418177	0	10
8460	WASF2	incomplete-splice_match	5prime_fragment	FALSE	113	390	253	74	30	26	7	6	49	20	36	47	35	39	26	31.84	74.5267	46.5431	16.8846	21.4145	25.5009	11.3851	12.8125	27.1321	9.90186	15.7435	30.2652	12.0498	16.3089	11.705	15
8462	WASF2	incomplete-splice_match	5prime_fragment	FALSE	4	13	10	7	2	2	1	1	3	1	5	4	7	3	1	1.12708	2.48422	1.83965	1.59719	1.42764	1.96161	1.62645	2.13542	1.66115	0.495093	2.1866	2.57576	2.40995	1.25453	0.450192	13
8464	WASF2	incomplete-splice_match	5prime_fragment	FALSE	5	6	5	2	3	5	2	1	3	1	3	4	3	1	5	1.40885	1.14656	0.919825	0.456341	2.14145	4.90402	3.25289	2.13542	1.66115	0.495093	1.31196	2.57576	1.03284	0.418177	2.25096	11
8465	AHDC1	incomplete-splice_match	3prime_fragment	FALSE	88	371	66	731	47	114	24	69	197	473	448	308	738	65	459	24.7957	70.8959	12.1417	166.793	33.5494	111.812	39.0347	147.344	109.082	234.179	195.92	198.334	254.078	27.1815	206.638	15
8469	IFI6	full-splice_match	alternative_5end	FALSE	301	383	693	37	186	78	73	65	177	271	519	190	380	138	203	84.8127	73.189	127.488	8.44231	132.77	76.5027	118.731	138.803	98.0078	134.17	226.969	122.349	130.826	57.7084	91.389	15
8472	IFI6	full-splice_match	reference_match	FALSE	14	13	44	331	3	0	0	0	3	2	1	1	3	4	4	3.94478	2.48422	8.09446	75.5245	2.14145	0	0	0	1.66115	0.990186	0.437321	0.643941	1.03284	1.67271	1.80077	9
8476	ENSG00000287244	full-splice_match	mono-exon	FALSE	3	0	0	0	2	3	0	2	2	0	2	1	0	0	0	0.845309	0	0	0	1.42764	2.94241	0	4.27085	1.10743	0	0.874642	0.643941	0	0	0	4
8478	RPA2	full-splice_match	alternative_5end	FALSE	82	230	223	220	39	7	32	0	107	150	144	70	184	213	129	23.1051	43.9516	41.0242	50.1975	27.8389	6.86563	52.0463	0	59.2477	74.264	62.9742	45.0759	63.3474	89.0717	58.0748	14
8483	RPA2	incomplete-splice_match	5prime_fragment	FALSE	7	2	1	4	1	1	2	0	0	2	3	2	5	2	3	1.97239	0.382188	0.183965	0.912682	0.713818	0.980804	3.25289	0	0	0.990186	1.31196	1.28788	1.7214	0.836354	1.35058	6
8485	RPA2	incomplete-splice_match	5prime_fragment	FALSE	22	21	34	9	6	0	4	4	7	11	25	10	13	16	9	6.19893	4.01298	6.25481	2.05354	4.28291	0	6.50579	8.5417	3.87602	5.44602	10.933	6.43941	4.47563	6.69083	4.05173	14
8490	RN7SL559P	full-splice_match	mono-exon	FALSE	5	9	7	7	0	2	2	3	5	5	8	4	9	2	7	1.40885	1.71985	1.28775	1.59719	0	1.96161	3.25289	6.40627	2.76858	2.47547	3.49857	2.57576	3.09851	0.836354	3.15134	13
8491	EYA3	incomplete-splice_match	5prime_fragment	FALSE	3	4	4	2	0	1	1	1	2	1	0	1	5	5	5	0.845309	0.764376	0.73586	0.456341	0	0.980804	1.62645	2.13542	1.10743	0.495093	0	0.643941	1.7214	2.09089	2.25096	6
8494	EYA3	incomplete-splice_match	5prime_fragment	FALSE	84	59	58	26	23	42	13	14	29	26	31	37	37	43	77	23.6687	11.2746	10.67	5.93244	16.4178	41.1938	21.1438	29.8959	16.0578	12.8724	13.5569	23.8258	12.7383	17.9816	34.6648	15
8495	EYA3	novel_not_in_catalog	novel_exon	FALSE	4	6	10	0	5	4	6	0	9	2	7	8	2	4	21	1.12708	1.14656	1.83965	0	3.56909	3.92321	9.75868	0	4.98345	0.990186	3.06125	5.15153	0.688558	1.67271	9.45403	11
8497	SPCS2P4	full-splice_match	mono-exon	FALSE	8	29	5	26	1	1	0	2	2	10	7	4	7	8	10	2.25416	5.54173	0.919825	5.93244	0.713818	0.980804	0	4.27085	1.10743	4.95093	3.06125	2.57576	2.40995	3.34542	4.50192	11
8503	DNAJC8	full-splice_match	alternative_3end	FALSE	245	496	413	515	149	85	11	0	23	361	430	295	480	304	330	69.0336	94.7827	75.9775	117.508	106.359	83.3683	17.8909	0	12.7355	178.729	188.048	189.963	165.254	127.126	148.563	14
8511	DNAJC8	incomplete-splice_match	5prime_fragment	FALSE	10	16	9	8	1	2	0	0	0	4	2	0	0	4	2	2.8177	3.05751	1.65568	1.82536	0.713818	1.96161	0	0	0	1.98037	0.874642	0	0	1.67271	0.900384	7
8512	DNAJC8	incomplete-splice_match	5prime_fragment	FALSE	113	80	131	31	14	6	5	3	13	13	41	34	25	24	15	31.84	15.2875	24.0994	7.07329	9.99345	5.88482	8.13224	6.40627	7.19832	6.43621	17.9302	21.894	8.60698	10.0363	6.75288	15
8517	DNAJC8	incomplete-splice_match	5prime_fragment	FALSE	61	43	54	26	3	4	1	4	8	11	20	18	18	14	6	17.1879	8.21705	9.93411	5.93244	2.14145	3.92321	1.62645	8.5417	4.42973	5.44602	8.74642	11.5909	6.19702	5.85448	2.70115	15
8520	DNAJC8	incomplete-splice_match	5prime_fragment	FALSE	74	61	89	0	0	0	0	0	0	0	1	53	33	47	0	20.851	11.6567	16.3729	0	0	0	0	0	0	0	0.437321	34.1289	11.3612	19.6543	0	6
8523	ENSG00000270605	full-splice_match	mono-exon	FALSE	1	1	0	13	0	0	0	2	5	11	9	3	5	3	11	0.28177	0.191094	0	2.96622	0	0	0	4.27085	2.76858	5.44602	3.93589	1.93182	1.7214	1.25453	4.95211	9
8529	SNHG12	full-splice_match	alternative_5end	FALSE	12	31	25	11	4	6	1	2	4	5	4	6	8	11	11	3.38124	5.92392	4.59912	2.50988	2.85527	5.88482	1.62645	4.27085	2.21487	2.47547	1.74928	3.86365	2.75423	4.59995	4.95211	15
8530	SNHG12	full-splice_match	reference_match	FALSE	12	33	10	30	17	10	17	0	2	0	18	9	33	12	17	3.38124	6.30611	1.83965	6.84512	12.1349	9.80804	27.6496	0	1.10743	0	7.87177	5.79547	11.3612	5.01813	7.65327	13
8531	SNHG12	full-splice_match	reference_match	FALSE	3	3	9	4	0	2	3	0	4	0	2	1	5	2	2	0.845309	0.573282	1.65568	0.912682	0	1.96161	4.87934	0	2.21487	0	0.874642	0.643941	1.7214	0.836354	0.900384	5
8532	SNHG12	incomplete-splice_match	intron_retention	FALSE	1	0	15	0	0	0	0	10	6	18	0	0	1	1	0	0.28177	0	2.75947	0	0	0	0	21.3542	3.3223	8.91168	0	0	0.344279	0.418177	0	4
8537	SNHG12	incomplete-splice_match	3prime_fragment	FALSE	1	0	0	5	2	0	1	0	2	0	0	0	2	3	3	0.28177	0	0	1.14085	1.42764	0	1.62645	0	1.10743	0	0	0	0.688558	1.25453	1.35058	6
8539	SNHG12	full-splice_match	mono-exon	FALSE	1	1	6	0	1	0	2	0	2	2	1	1	0	5	1	0.28177	0.191094	1.10379	0	0.713818	0	3.25289	0	1.10743	0.990186	0.437321	0.643941	0	2.09089	0.450192	4
8541	TAF12	full-splice_match	alternative_3end5end	FALSE	37	122	95	135	12	7	7	1	58	41	35	24	77	62	51	10.4255	23.3135	17.4767	30.803	8.56581	6.86563	11.3851	2.13542	32.1156	20.2988	15.3062	15.4546	26.5095	25.927	22.9598	15
8546	TAF12	incomplete-splice_match	5prime_fragment	FALSE	8	6	12	7	0	2	0	0	4	3	7	2	6	6	2	2.25416	1.14656	2.20758	1.59719	0	1.96161	0	0	2.21487	1.48528	3.06125	1.28788	2.06567	2.50906	0.900384	11
8549	ENSG00000289291	full-splice_match	mono-exon	FALSE	11	5	7	1	0	0	0	1	2	2	0	4	3	1	4	3.09947	0.95547	1.28775	0.228171	0	0	0	2.13542	1.10743	0.990186	0	2.57576	1.03284	0.418177	1.80077	7
8551	SRSF4	incomplete-splice_match	3prime_fragment	FALSE	88	0	0	17	14	0	1	0	0	1	26	0	0	0	0	24.7957	0	0	3.8789	9.99345	0	1.62645	0	0	0.495093	11.3703	0	0	0	0	5
8552	SRSF4	incomplete-splice_match	3prime_fragment	FALSE	39	0	1	0	0	46	1	0	87	8	0	0	227	0	88	10.989	0	0.183965	0	0	45.117	1.62645	0	48.1733	3.96075	0	0	78.1514	0	39.6169	7
8554	SRSF4	full-splice_match	alternative_3end5end	FALSE	2	336	37	404	5	0	1	0	6	2	6	2	2	2	0	0.563539	64.2076	6.8067	92.1809	3.56909	0	1.62645	0	3.3223	0.990186	2.62392	1.28788	0.688558	0.836354	0	8
8555	SRSF4	incomplete-splice_match	5prime_fragment	FALSE	12	23	28	13	2	5	1	0	5	3	5	5	5	5	0	3.38124	4.39516	5.15102	2.96622	1.42764	4.90402	1.62645	0	2.76858	1.48528	2.1866	3.21971	1.7214	2.09089	0	13
8559	SRSF4	incomplete-splice_match	5prime_fragment	FALSE	3	2	3	5	1	1	0	0	2	8	7	5	2	3	1	0.845309	0.382188	0.551895	1.14085	0.713818	0.980804	0	0	1.10743	3.96075	3.06125	3.21971	0.688558	1.25453	0.450192	6
8562	MECR	full-splice_match	alternative_3end	FALSE	73	18	9	0	29	0	0	0	0	0	0	1	53	9	0	20.5692	3.43969	1.65568	0	20.7007	0	0	0	0	0	0	0.643941	18.2468	3.76359	0	6
8567	MECR	full-splice_match	alternative_3end5end	FALSE	1	1	10	40	0	0	0	0	0	1	0	48	3	1	77	0.28177	0.191094	1.83965	9.12682	0	0	0	0	0	0.495093	0	30.9092	1.03284	0.418177	34.6648	5
8573	PLA2G2C	full-splice_match	alternative_5end	FALSE	24	6	16	5	3	0	4	3	4	7	16	7	18	9	3	6.76247	1.14656	2.94344	1.14085	2.14145	0	6.50579	6.40627	2.21487	3.46565	6.99713	4.50759	6.19702	3.76359	1.35058	14
8584	CAMK2N1	full-splice_match	alternative_3end	FALSE	73	35	52	823	55	92	144	1	241	0	19	32	36	67	27	20.5692	6.68829	9.56618	187.784	39.26	90.2339	234.208	2.13542	133.446	0	8.30909	20.6061	12.394	28.0179	12.1552	14
8589	CAMK2N1	full-splice_match	alternative_5end	FALSE	77	2510	68	4260	315	182	289	56	43	2238	286	1281	1266	1290	544	21.6963	479.646	12.5096	972.007	224.853	178.506	470.043	119.584	23.8098	1108.02	125.074	824.889	435.857	539.449	244.905	15
8604	DDOST	full-splice_match	reference_match	FALSE	256	243	50	307	101	13	27	0	84	3	14	149	95	227	167	72.133	46.4359	9.19825	70.0484	72.0956	12.7504	43.9141	0	46.5122	1.48528	6.12249	95.9472	32.7065	94.9262	75.1821	14
8613	DDOST	full-splice_match	alternative_3end	FALSE	4	2	10	0	10	2	2	1	4	0	2	3	2	0	2	1.12708	0.382188	1.83965	0	7.13818	1.96161	3.25289	2.13542	2.21487	0	0.874642	1.93182	0.688558	0	0.900384	8
8620	KIF17	incomplete-splice_match	internal_fragment	FALSE	13	0	1	8	2	2	0	0	1	2	5	4	2	1	0	3.66301	0	0.183965	1.82536	1.42764	1.96161	0	0	0.553717	0.990186	2.1866	2.57576	0.688558	0.418177	0	6
8626	HP1BP3	novel_in_catalog	combination_of_known_junctions	FALSE	3	17	21	0	473	0	0	0	0	0	0	2	28	0	0	0.845309	3.2486	3.86326	0	337.636	0	0	0	0	0	0	1.28788	9.63982	0	0	5
8627	HP1BP3	incomplete-splice_match	internal_fragment	FALSE	6	4	0	0	2	0	1	2	0	0	0	0	9	181	0	1.69062	0.764376	0	0	1.42764	0	1.62645	4.27085	0	0	0	0	3.09851	75.6901	0	6
8641	BRINP3-DT	novel_not_in_catalog	novel_exon	FALSE	4	0	5	0	2	0	0	1	3	0	1	2	10	1	2	1.12708	0	0.919825	0	1.42764	0	0	2.13542	1.66115	0	0.437321	1.28788	3.44279	0.418177	0.900384	6
8646	BRINP3-DT	novel_not_in_catalog	novel_exon	FALSE	1	8	8	1	0	0	0	0	2	0	10	3	0	5	1	0.28177	1.52875	1.47172	0.228171	0	0	0	0	1.10743	0	4.37321	1.93182	0	2.09089	0.450192	6
8647	BRINP3-DT	full-splice_match	alternative_5end	FALSE	3	2	3	0	2	2	0	0	0	2	6	3	1	2	5	0.845309	0.382188	0.551895	0	1.42764	1.96161	0	0	0	0.990186	2.62392	1.93182	0.344279	0.836354	2.25096	5
8648	BRINP3-DT	full-splice_match	alternative_5end	FALSE	1	6	13	1	3	1	0	1	3	4	8	3	4	4	5	0.28177	1.14656	2.39154	0.228171	2.14145	0.980804	0	2.13542	1.66115	1.98037	3.49857	1.93182	1.37712	1.67271	2.25096	11
8649	TMEM69	full-splice_match	alternative_3end	FALSE	76	21	21	100	33	36	0	14	2	3	70	56	2	32	76	21.4145	4.01298	3.86326	22.8171	23.556	35.3089	0	29.8959	1.10743	1.48528	30.6125	36.0607	0.688558	13.3817	34.2146	13
8650	TMEM69	full-splice_match	reference_match	FALSE	10	1	14	16	1	1	1	2	0	101	18	3	108	1	2	2.8177	0.191094	2.57551	3.65073	0.713818	0.980804	1.62645	4.27085	0	50.0044	7.87177	1.93182	37.1821	0.418177	0.900384	9
8662	LURAP1	full-splice_match	alternative_3end5end	FALSE	42	19	31	5	14	13	1	0	7	6	6	7	4	11	6	11.8343	3.63079	5.70291	1.14085	9.99345	12.7504	1.62645	0	3.87602	2.97056	2.62392	4.50759	1.37712	4.59995	2.70115	14
8665	UQCRH	full-splice_match	alternative_5end	FALSE	1899	890	2404	285	443	271	232	145	540	1119	1370	736	1547	1128	1149	535.081	170.074	442.252	65.0286	316.221	265.798	377.336	309.637	299.007	554.009	599.129	473.941	532.6	471.704	517.271	15
8666	UQCRH	full-splice_match	alternative_5end	FALSE	191	66	229	930	25	14	4	5	40	61	55	31	103	68	45	53.818	12.6122	42.128	212.199	17.8454	13.7313	6.50579	10.6771	22.1487	30.2007	24.0526	19.9622	35.4607	28.436	20.2586	15
8667	UQCRH	novel_in_catalog	combination_of_known_splicesites	FALSE	39	23	48	3	14	5	7	13	45	12	34	9	30	23	9	10.989	4.39516	8.83032	0.684512	9.99345	4.90402	11.3851	27.7605	24.9172	5.94112	14.8689	5.79547	10.3284	9.61807	4.05173	14
8669	UQCRH	full-splice_match	reference_match	FALSE	19	18	26	18	9	15	0	0	4	1	8	9	6	10	5	5.35362	3.43969	4.78309	4.10707	6.42436	14.7121	0	0	2.21487	0.495093	3.49857	5.79547	2.06567	4.18177	2.25096	12
8670	UQCRH	full-splice_match	reference_match	FALSE	6	2	11	2	0	0	0	0	1	3	3	0	7	1	0	1.69062	0.382188	2.02361	0.456341	0	0	0	0	0.553717	1.48528	1.31196	0	2.40995	0.418177	0	5
8672	UQCRH	incomplete-splice_match	5prime_fragment	FALSE	5	4	7	2	6	2	0	2	0	1	5	5	9	2	7	1.40885	0.764376	1.28775	0.456341	4.28291	1.96161	0	4.27085	0	0.495093	2.1866	3.21971	3.09851	0.836354	3.15134	9
8675	UQCRH	novel_in_catalog	combination_of_known_splicesites	FALSE	10	12	18	7	5	0	0	1	0	8	7	8	8	8	5	2.8177	2.29313	3.31137	1.59719	3.56909	0	0	2.13542	0	3.96075	3.06125	5.15153	2.75423	3.34542	2.25096	12
8679	UQCRH	incomplete-splice_match	3prime_fragment	FALSE	4	0	0	0	0	0	0	1	0	1	0	0	4	1	5	1.12708	0	0	0	0	0	0	2.13542	0	0.495093	0	0	1.37712	0.418177	2.25096	4
8680	UQCRH	full-splice_match	alternative_5end	FALSE	5	6	0	0	1	0	1	1	9	2	1	1	3	3	1	1.40885	1.14656	0	0	0.713818	0	1.62645	2.13542	4.98345	0.990186	0.437321	0.643941	1.03284	1.25453	0.450192	7
8688	RBBP4	full-splice_match	alternative_3end5end	FALSE	129	87	132	116	75	47	30	23	90	49	124	98	129	50	87	36.3483	16.6252	24.2834	26.4678	53.5363	46.0978	48.7934	49.1148	49.8345	24.2596	54.2278	63.1062	44.412	20.9089	39.1667	15
8691	FAAH	full-splice_match	reference_match	FALSE	387	61	337	4	0	162	0	0	0	0	0	282	0	181	0	109.045	11.6567	61.9962	0.912682	0	158.89	0	0	0	0	0	181.591	0	75.6901	0	6
8697	FAAH	novel_in_catalog	combination_of_known_junctions	FALSE	7	14	10	0	0	0	0	0	0	0	0	0	0	3	0	1.97239	2.67532	1.83965	0	0	0	0	0	0	0	0	0	0	1.25453	0	4
8699	RBBP4	full-splice_match	alternative_3end5end	FALSE	103	98	139	42	15	11	16	5	20	25	33	32	33	21	18	29.0223	18.7272	25.5711	9.58316	10.7073	10.7888	26.0232	10.6771	11.0743	12.3773	14.4316	20.6061	11.3612	8.78172	8.10346	15
8702	RBBP4	full-splice_match	alternative_3end5end	FALSE	4	13	158	0	0	14	0	0	0	0	0	0	0	0	0	1.12708	2.48422	29.0665	0	0	13.7313	0	0	0	0	0	0	0	0	0	4
8708	FAAH	incomplete-splice_match	3prime_fragment	FALSE	6	0	8	4	0	2	1	4	2	5	1	1	2	1	2	1.69062	0	1.47172	0.912682	0	1.96161	1.62645	8.5417	1.10743	2.47547	0.437321	0.643941	0.688558	0.418177	0.900384	7
8710	RBBP4	full-splice_match	alternative_3end	FALSE	32	26	50	9	6	6	6	1	11	14	19	10	10	10	27	9.01663	4.96845	9.19825	2.05354	4.28291	5.88482	9.75868	2.13542	6.09088	6.9313	8.30909	6.43941	3.44279	4.18177	12.1552	15
8715	CYP4X1	incomplete-splice_match	5prime_fragment	FALSE	7	16	17	0	0	6	0	0	0	0	0	0	0	2	31	1.97239	3.05751	3.1274	0	0	5.88482	0	0	0	0	0	0	0	0.836354	13.956	5
8716	CYP4X1	incomplete-splice_match	5prime_fragment	FALSE	4	2	2	0	3	2	3	3	0	4	4	10	6	1	3	1.12708	0.382188	0.36793	0	2.14145	1.96161	4.87934	6.40627	0	1.98037	1.74928	6.43941	2.06567	0.418177	1.35058	10
8721	CYP4X1	incomplete-splice_match	3prime_fragment	FALSE	77	67	0	0	0	0	53	0	0	0	0	72	0	20	0	21.6963	12.8033	0	0	0	0	86.2017	0	0	0	0	46.3638	0	8.36354	0	5
8722	CYP4X1	incomplete-splice_match	3prime_fragment	FALSE	1	0	1	0	0	0	1	0	0	21	10	0	0	0	21	0.28177	0	0.183965	0	0	0	1.62645	0	0	10.397	4.37321	0	0	0	9.45403	4
8723	CYP4X1	incomplete-splice_match	3prime_fragment	FALSE	1	0	0	86	0	0	2	19	60	1	85	0	0	3	2	0.28177	0	0	19.6227	0	0	3.25289	40.5731	33.223	0.495093	37.1723	0	0	1.25453	0.900384	6
8728	CMPK1	full-splice_match	alternative_3end5end	FALSE	122	310	48	275	16	14	9	0	0	65	47	47	81	76	49	34.3759	59.2392	8.83032	62.7469	11.4211	13.7313	14.638	0	0	32.1811	20.5541	30.2652	27.8866	31.7815	22.0594	13
8730	CMPK1	incomplete-splice_match	5prime_fragment	FALSE	15	12	19	11	3	1	1	0	2	0	5	3	0	4	1	4.22655	2.29313	3.49533	2.50988	2.14145	0.980804	1.62645	0	1.10743	0	2.1866	1.93182	0	1.67271	0.450192	10
8731	CMPK1	incomplete-splice_match	5prime_fragment	FALSE	11	17	21	11	0	0	1	0	5	3	4	1	5	6	0	3.09947	3.2486	3.86326	2.50988	0	0	1.62645	0	2.76858	1.48528	1.74928	0.643941	1.7214	2.50906	0	10
8732	CMPK1	incomplete-splice_match	5prime_fragment	FALSE	18	3	4	26	22	13	6	3	0	1	21	24	0	0	0	5.07185	0.573282	0.73586	5.93244	15.704	12.7504	9.75868	6.40627	0	0.495093	9.18374	15.4546	0	0	0	8
8733	CMPK1	full-splice_match	alternative_3end5end	FALSE	9	18	16	4	2	0	4	1	3	5	3	1	8	3	2	2.53593	3.43969	2.94344	0.912682	1.42764	0	6.50579	2.13542	1.66115	2.47547	1.31196	0.643941	2.75423	1.25453	0.900384	11
8746	ELAVL4	incomplete-splice_match	5prime_fragment	FALSE	2	1	4	0	2	2	1	0	0	0	5	3	0	2	0	0.563539	0.191094	0.73586	0	1.42764	1.96161	1.62645	0	0	0	2.1866	1.93182	0	0.836354	0	5
8751	ELAVL4	incomplete-splice_match	5prime_fragment	FALSE	8	6	9	4	3	2	1	0	7	10	3	0	10	11	15	2.25416	1.14656	1.65568	0.912682	2.14145	1.96161	1.62645	0	3.87602	4.95093	1.31196	0	3.44279	4.59995	6.75288	12
8752	ELAVL4	full-splice_match	alternative_3end	FALSE	7	106	132	0	0	0	0	0	0	0	0	0	0	61	0	1.97239	20.256	24.2834	0	0	0	0	0	0	0	0	0	0	25.5088	0	4
8753	ELAVL4	incomplete-splice_match	5prime_fragment	FALSE	2	0	3	5	0	0	0	0	1	4	3	1	2	3	1	0.563539	0	0.551895	1.14085	0	0	0	0	0.553717	1.98037	1.31196	0.643941	0.688558	1.25453	0.450192	4
8755	ELAVL4	incomplete-splice_match	5prime_fragment	FALSE	3	3	3	1	2	0	0	2	0	3	0	2	3	9	3	0.845309	0.573282	0.551895	0.228171	1.42764	0	0	4.27085	0	1.48528	0	1.28788	1.03284	3.76359	1.35058	7
8756	ELAVL4	full-splice_match	alternative_3end5end	FALSE	17	9	13	0	0	0	0	0	0	105	0	75	42	1	0	4.79008	1.71985	2.39154	0	0	0	0	0	0	51.9848	0	48.2956	14.4597	0.418177	0	6
8757	ELAVL4	incomplete-splice_match	5prime_fragment	FALSE	4	4	3	0	2	1	0	0	4	7	7	3	6	9	9	1.12708	0.764376	0.551895	0	1.42764	0.980804	0	0	2.21487	3.46565	3.06125	1.93182	2.06567	3.76359	4.05173	9
8762	ELAVL4	incomplete-splice_match	3prime_fragment	FALSE	1	0	1	175	2	0	0	0	39	0	83	16	3	0	0	0.28177	0	0.183965	39.9299	1.42764	0	0	0	21.5949	0	36.2976	10.3031	1.03284	0	0	6
8763	ELAVL4	incomplete-splice_match	3prime_fragment	FALSE	1	0	0	0	0	0	0	0	0	1	66	0	7	3	81	0.28177	0	0	0	0	0	0	0	0	0.495093	28.8632	0	2.40995	1.25453	36.4656	4
8768	KIAA1522	incomplete-splice_match	5prime_fragment	FALSE	6	11	8	2	7	8	3	2	7	10	25	10	18	20	9	1.69062	2.10204	1.47172	0.456341	4.99672	7.84643	4.87934	4.27085	3.87602	4.95093	10.933	6.43941	6.19702	8.36354	4.05173	14
8772	CDKN2C	full-splice_match	alternative_5end	FALSE	5	14	10	163	11	6	0	0	30	1	7	0	6	10	18	1.40885	2.67532	1.83965	37.1918	7.85199	5.88482	0	0	16.6115	0.495093	3.06125	0	2.06567	4.18177	8.10346	11
8773	CDKN2C	full-splice_match	reference_match	FALSE	7	68	25	18	2	1	0	0	13	6	2	13	3	14	2	1.97239	12.9944	4.59912	4.10707	1.42764	0.980804	0	0	7.19832	2.97056	0.874642	8.37123	1.03284	5.85448	0.900384	10
8774	RNF11	incomplete-splice_match	5prime_fragment	FALSE	3	1	3	1	12	0	9	0	0	0	3	0	29	3	0	0.845309	0.191094	0.551895	0.228171	8.56581	0	14.638	0	0	0	1.31196	0	9.98409	1.25453	0	5
8776	RNF11	full-splice_match	alternative_3end	FALSE	47	197	615	544	82	42	11	4	32	47	29	19	198	190	20	13.2432	37.6455	113.138	124.125	58.533	41.1938	17.8909	8.5417	17.7189	23.2694	12.6823	12.2349	68.1673	79.4537	9.00384	15
8778	RNF11	full-splice_match	alternative_3end5end	FALSE	9	11	1	1	6	0	0	0	0	73	33	1	348	4	240	2.53593	2.10204	0.183965	0.228171	4.28291	0	0	0	0	36.1418	14.4316	0.643941	119.809	1.67271	108.046	8
8783	S100PBP	incomplete-splice_match	5prime_fragment	FALSE	1	0	6	6	0	0	2	1	2	0	0	0	1	0	0	0.28177	0	1.10379	1.36902	0	0	3.25289	2.13542	1.10743	0	0	0	0.344279	0	0	5
8784	S100PBP	incomplete-splice_match	5prime_fragment	FALSE	24	67	41	14	4	11	12	4	4	4	8	9	12	14	12	6.76247	12.8033	7.54256	3.19439	2.85527	10.7888	19.5174	8.5417	2.21487	1.98037	3.49857	5.79547	4.13135	5.85448	5.40231	15
8786	OSBPL9	incomplete-splice_match	5prime_fragment	FALSE	26	18	28	1	7	3	0	7	13	1	6	9	5	14	3	7.32601	3.43969	5.15102	0.228171	4.99672	2.94241	0	14.948	7.19832	0.495093	2.62392	5.79547	1.7214	5.85448	1.35058	12
8787	OSBPL9	incomplete-splice_match	5prime_fragment	FALSE	27	23	38	5	0	4	1	3	18	16	5	7	9	23	14	7.60778	4.39516	6.99067	1.14085	0	3.92321	1.62645	6.40627	9.9669	7.92149	2.1866	4.50759	3.09851	9.61807	6.30269	14
8788	OSBPL9	incomplete-splice_match	5prime_fragment	FALSE	11	18	12	11	1	2	0	0	6	6	2	9	1	10	8	3.09947	3.43969	2.20758	2.50988	0.713818	1.96161	0	0	3.3223	2.97056	0.874642	5.79547	0.344279	4.18177	3.60154	10
8789	OSBPL9	incomplete-splice_match	5prime_fragment	FALSE	43	10	14	3	0	2	2	1	3	0	12	0	8	5	3	12.1161	1.91094	2.57551	0.684512	0	1.96161	3.25289	2.13542	1.66115	0	5.24785	0	2.75423	2.09089	1.35058	11
8790	OSBPL9	incomplete-splice_match	5prime_fragment	FALSE	19	40	6	7	6	3	1	1	2	4	2	20	5	25	4	5.35362	7.64376	1.10379	1.59719	4.28291	2.94241	1.62645	2.13542	1.10743	1.98037	0.874642	12.8788	1.7214	10.4544	1.80077	14
8791	OSBPL9	incomplete-splice_match	5prime_fragment	FALSE	42	57	68	45	3	3	0	1	10	7	6	14	6	7	13	11.8343	10.8924	12.5096	10.2677	2.14145	2.94241	0	2.13542	5.53717	3.46565	2.62392	9.01518	2.06567	2.92724	5.8525	14
8795	OSBPL9	incomplete-splice_match	5prime_fragment	FALSE	16	28	3	6	0	0	0	0	9	1	0	3	4	9	12	4.50831	5.35063	0.551895	1.36902	0	0	0	0	4.98345	0.495093	0	1.93182	1.37712	3.76359	5.40231	8
8797	OSBPL9	incomplete-splice_match	5prime_fragment	FALSE	14	37	14	13	6	0	1	0	4	5	6	0	4	3	4	3.94478	7.07048	2.57551	2.96622	4.28291	0	1.62645	0	2.21487	2.47547	2.62392	0	1.37712	1.25453	1.80077	12
8798	OSBPL9	incomplete-splice_match	5prime_fragment	FALSE	3	22	8	34	0	0	1	0	5	11	0	0	12	1	11	0.845309	4.20407	1.47172	7.7578	0	0	1.62645	0	2.76858	5.44602	0	0	4.13135	0.418177	4.95211	8
8799	OSBPL9	incomplete-splice_match	5prime_fragment	FALSE	8	14	24	8	0	0	0	0	4	0	8	0	3	2	4	2.25416	2.67532	4.41516	1.82536	0	0	0	0	2.21487	0	3.49857	0	1.03284	0.836354	1.80077	8
8821	S100PBP	incomplete-splice_match	3prime_fragment	FALSE	27	0	0	29	0	0	0	0	0	0	0	0	25	14	23	7.60778	0	0	6.61695	0	0	0	0	0	0	0	0	8.60698	5.85448	10.3544	5
8830	ENSG00000272175	full-splice_match	mono-exon	FALSE	1	3	1	6	1	0	0	0	2	1	0	0	2	3	4	0.28177	0.573282	0.183965	1.36902	0.713818	0	0	0	1.10743	0.495093	0	0	0.688558	1.25453	1.80077	4
8833	BTF3L4	full-splice_match	alternative_3end5end	FALSE	143	385	170	19	27	31	5	11	33	107	114	112	151	66	77	40.2931	73.5712	31.274	4.33524	19.2731	30.4049	8.13224	23.4897	18.2726	52.975	49.8546	72.1214	51.9861	27.5997	34.6648	15
8834	BTF3L4	full-splice_match	alternative_3end5end	FALSE	116	65	63	247	9	3	17	4	105	154	50	15	134	216	64	32.6853	12.4211	11.5898	56.3581	6.42436	2.94241	27.6496	8.5417	58.1402	76.2443	21.866	9.65912	46.1334	90.3263	28.8123	15
8835	BTF3L4	incomplete-splice_match	5prime_fragment	FALSE	26	26	2	0	8	13	0	0	15	7	8	2	6	2	8	7.32601	4.96845	0.36793	0	5.71054	12.7504	0	0	8.30575	3.46565	3.49857	1.28788	2.06567	0.836354	3.60154	10
8836	BTF3L4	incomplete-splice_match	5prime_fragment	FALSE	6	5	2	1	1	3	0	1	1	1	2	2	3	2	11	1.69062	0.95547	0.36793	0.228171	0.713818	2.94241	0	2.13542	0.553717	0.495093	0.874642	1.28788	1.03284	0.836354	4.95211	6
8837	BTF3L4	novel_in_catalog	combination_of_known_junctions	FALSE	5	4	70	21	2	1	0	0	0	2	33	1	1	10	0	1.40885	0.764376	12.8775	4.79158	1.42764	0.980804	0	0	0	0.990186	14.4316	0.643941	0.344279	4.18177	0	6
8838	BTF3L4	full-splice_match	alternative_3end	FALSE	42	28	65	0	9	3	0	0	28	17	1	19	13	22	26	11.8343	5.35063	11.9577	0	6.42436	2.94241	0	0	15.5041	8.41658	0.437321	12.2349	4.47563	9.1999	11.705	11
8839	BTF3L4	incomplete-splice_match	5prime_fragment	FALSE	7	1	9	2	0	3	2	3	7	6	12	9	8	8	5	1.97239	0.191094	1.65568	0.456341	0	2.94241	3.25289	6.40627	3.87602	2.97056	5.24785	5.79547	2.75423	3.34542	2.25096	12
8840	BTF3L4	incomplete-splice_match	5prime_fragment	FALSE	5	6	11	3	1	1	2	1	2	0	2	4	3	0	2	1.40885	1.14656	2.02361	0.684512	0.713818	0.980804	3.25289	2.13542	1.10743	0	0.874642	2.57576	1.03284	0	0.900384	8
8841	BTF3L4	full-splice_match	alternative_3end	FALSE	8	5	12	6	1	2	2	0	4	2	7	1	3	5	0	2.25416	0.95547	2.20758	1.36902	0.713818	1.96161	3.25289	0	2.21487	0.990186	3.06125	0.643941	1.03284	2.09089	0	9
8842	BTF3L4	full-splice_match	reference_match	FALSE	12	15	15	2	1	1	4	0	1	2	3	3	3	5	1	3.38124	2.86641	2.75947	0.456341	0.713818	0.980804	6.50579	0	0.553717	0.990186	1.31196	1.93182	1.03284	2.09089	0.450192	8
8843	BTF3L4	incomplete-splice_match	5prime_fragment	FALSE	8	2	4	7	1	3	0	0	1	4	4	2	4	2	3	2.25416	0.382188	0.73586	1.59719	0.713818	2.94241	0	0	0.553717	1.98037	1.74928	1.28788	1.37712	0.836354	1.35058	8
8848	ZFYVE9	incomplete-splice_match	5prime_fragment	FALSE	32	74	43	102	12	2	9	2	2	17	31	14	17	0	7	9.01663	14.141	7.91049	23.2734	8.56581	1.96161	14.638	4.27085	1.10743	8.41658	13.5569	9.01518	5.85274	0	3.15134	14
8849	ZFYVE9	incomplete-splice_match	5prime_fragment	FALSE	11	6	3	3	0	3	5	6	1	3	4	7	6	8	4	3.09947	1.14656	0.551895	0.684512	0	2.94241	8.13224	12.8125	0.553717	1.48528	1.74928	4.50759	2.06567	3.34542	1.80077	11
8864	ZFYVE9	incomplete-splice_match	3prime_fragment	FALSE	2	0	1	1	4	1	1	4	3	4	1	7	0	0	5	0.563539	0	0.183965	0.228171	2.85527	0.980804	1.62645	8.5417	1.66115	1.98037	0.437321	4.50759	0	0	2.25096	7
8865	ENSG00000272100	full-splice_match	mono-exon	FALSE	1	0	1	5	4	4	2	3	4	5	7	2	2	4	8	0.28177	0	0.183965	1.14085	2.85527	3.92321	3.25289	6.40627	2.21487	2.47547	3.06125	1.28788	0.688558	1.67271	3.60154	11
8867	PRPF38A	incomplete-splice_match	5prime_fragment	FALSE	11	11	15	8	2	7	2	1	5	2	2	4	5	6	7	3.09947	2.10204	2.75947	1.82536	1.42764	6.86563	3.25289	2.13542	2.76858	0.990186	0.874642	2.57576	1.7214	2.50906	3.15134	13
8869	PRPF38A	full-splice_match	alternative_3end5end	FALSE	12	13	19	5	4	4	2	3	3	7	7	4	4	8	15	3.38124	2.48422	3.49533	1.14085	2.85527	3.92321	3.25289	6.40627	1.66115	3.46565	3.06125	2.57576	1.37712	3.34542	6.75288	15
8870	PRPF38A	full-splice_match	alternative_3end	FALSE	10	67	15	0	0	6	0	0	10	0	0	0	0	9	9	2.8177	12.8033	2.75947	0	0	5.88482	0	0	5.53717	0	0	0	0	3.76359	4.05173	7
8875	GPX7	full-splice_match	alternative_5end	FALSE	16	23	32	0	2	3	0	1	5	5	8	4	14	5	10	4.50831	4.39516	5.88688	0	1.42764	2.94241	0	2.13542	2.76858	2.47547	3.49857	2.57576	4.81991	2.09089	4.50192	13
8877	ZYG11B	incomplete-splice_match	5prime_fragment	FALSE	12	20	17	11	6	6	0	0	7	0	12	4	7	9	1	3.38124	3.82188	3.1274	2.50988	4.28291	5.88482	0	0	3.87602	0	5.24785	2.57576	2.40995	3.76359	0.450192	11
8882	S100PBP	full-splice_match	alternative_3end5end	FALSE	12	10	10	7	1	15	0	5	9	4	3	3	14	7	25	3.38124	1.91094	1.83965	1.59719	0.713818	14.7121	0	10.6771	4.98345	1.98037	1.31196	1.93182	4.81991	2.92724	11.2548	13
8883	SCP2	incomplete-splice_match	5prime_fragment	FALSE	51	52	75	13	3	4	2	0	9	9	16	13	18	7	8	14.3703	9.93689	13.7974	2.96622	2.14145	3.92321	3.25289	0	4.98345	4.45584	6.99713	8.37123	6.19702	2.92724	3.60154	14
8885	SCP2	incomplete-splice_match	5prime_fragment	FALSE	11	9	8	9	0	1	1	0	0	4	3	3	3	2	0	3.09947	1.71985	1.47172	2.05354	0	0.980804	1.62645	0	0	1.98037	1.31196	1.93182	1.03284	0.836354	0	9
8897	SCP2	full-splice_match	alternative_3end5end	FALSE	33	43	52	317	28	11	3	3	177	167	70	21	176	99	127	9.2984	8.21705	9.56618	72.3301	19.9869	10.7888	4.87934	6.40627	98.0078	82.6806	30.6125	13.5228	60.5931	41.3995	57.1744	15
8899	SCP2	incomplete-splice_match	5prime_fragment	FALSE	4	3	6	1	0	1	2	0	1	3	1	6	1	3	6	1.12708	0.573282	1.10379	0.228171	0	0.980804	3.25289	0	0.553717	1.48528	0.437321	3.86365	0.344279	1.25453	2.70115	7
8901	SCP2	full-splice_match	reference_match	FALSE	1	2	4	0	0	0	15	0	7	0	0	0	4	4	1	0.28177	0.382188	0.73586	0	0	0	24.3967	0	3.87602	0	0	0	1.37712	1.67271	0.450192	4
8904	HPCA	full-splice_match	alternative_5end	FALSE	339	46	83	6	417	177	8	0	118	24	1547	1117	1299	53	443	95.5199	8.79033	15.2691	1.36902	297.662	173.602	13.0116	0	65.3386	11.8822	676.535	719.282	447.219	22.1634	199.435	14
8907	CPT2	full-splice_match	mono-exon	FALSE	2	4	2	1	0	0	0	2	3	2	1	0	4	0	4	0.563539	0.764376	0.36793	0.228171	0	0	0	4.27085	1.66115	0.990186	0.437321	0	1.37712	0	1.80077	4
8908	CPT2	incomplete-splice_match	3prime_fragment	FALSE	18	0	41	0	0	0	0	0	25	11	9	0	24	0	0	5.07185	0	7.54256	0	0	0	0	0	13.8429	5.44602	3.93589	0	8.2627	0	0	6
8910	HPCA	full-splice_match	alternative_3end	FALSE	5	2	7	2	0	0	264	0	0	4	1	0	4	2	1	1.40885	0.382188	1.28775	0.456341	0	0	429.382	0	0	1.98037	0.437321	0	1.37712	0.836354	0.450192	5
8914	HPCA	incomplete-splice_match	5prime_fragment	FALSE	11	9	6	0	3	2	5	0	2	8	15	9	14	24	11	3.09947	1.71985	1.10379	0	2.14145	1.96161	8.13224	0	1.10743	3.96075	6.55981	5.79547	4.81991	10.0363	4.95211	13
8915	LRP8-DT	full-splice_match	alternative_3end	FALSE	7	0	5	0	3	0	0	0	0	5	7	2	0	0	0	1.97239	0	0.919825	0	2.14145	0	0	0	0	2.47547	3.06125	1.28788	0	0	0	5
[truncated: 51,537 more rows]
