# Supplementary material for: RNA isoform diversity, splicing variants, and switching in single cells of the Alzheimer’s disease brain
Source: Research Square preprint supplement (doi:10.21203/rs.3.rs-7436496/v1), 2025-09-29
Supplement: Supplementary file 6 [file a022cd87d033cb41fb6346dc.xlsx]

## Sheet: README
Supplementary Table 8
Celltype_assignment_ADND - percentage of cells of each cell type expressing an isoform, split by AD/ND
Celltype_assingment - percentage of cells of each cell type expressing an isoform, not split by disease

## Sheet: Celltype_assignment_ADND
isoform_id	gene	category	ADpercentAst	ADpercentEx	ADpercentInh	ADpercentMic	ADpercentOPC	ADpercentOli	ADpercentPer	ADpercentEnd	NDpercentAst	NDpercentEx	NDpercentInh	NDpercentMic	NDpercentOPC	NDpercentOli	NDpercentPer	NDpercentEnd	conf_celltypes_AD	conf_celltypes_ND
4	MAFIP	novel_not_in_catalog	0	0	0	0	0	1	0	0	0.0714286	0.0357143	0.107143	0.0714286	0.0357143	0.642857	0	0.0357143	['oli']	['ast', 'inh', 'mic', 'oli']
6	ENSG00000277400	incomplete-splice_match	0.0930736	0.147186	0.0800866	0.04329	0.0281385	0.608225	0	0	0.0740056	0.13876	0.0564292	0.0555042	0.0425532	0.631822	0	0.000925069	['ast', 'ex', 'inh', 'oli']	['ast', 'ex', 'inh', 'mic', 'oli']
7	ENSG00000277400	novel_not_in_catalog	0.169811	0.226415	0.132075	0.0377358	0	0.415094	0	0.0188679	0.0728477	0.231788	0.0794702	0.0529801	0.0463576	0.516556	0	0	['ast', 'ex', 'inh', 'oli']	['ast', 'ex', 'inh', 'mic', 'oli']
9	MAFIP	novel_not_in_catalog	0	0.368421	0	0	0.0526316	0.578947	0	0	0.0857143	0.228571	0	0.0285714	0.0571429	0.6	0	0	['ex', 'opc', 'oli']	['ast', 'ex', 'opc', 'oli']
23	ENSG00000276256	novel_not_in_catalog	0.5	0.05	0.05	0.05	0.15	0.2	0	0	0.5	0.0625	0.0625	0	0.1875	0.1875	0	0	['ast', 'ex', 'inh', 'mic', 'opc', 'oli']	['ast', 'ex', 'inh', 'opc', 'oli']
26	ENSG00000278384	full-splice_match	0.236842	0.263158	0.131579	0.0526316	0.0526316	0.236842	0.0263158	0	0.0666667	0.2	0.0666667	0.0333333	0.0666667	0.566667	0	0	['ast', 'ex', 'inh', 'mic', 'opc', 'oli']	['ast', 'ex', 'inh', 'opc', 'oli']
39	ENSG00000273748	novel_not_in_catalog	0.0517241	0.103448	0.0862069	0.103448	0.0517241	0.603448	0	0	0.0526316	0.105263	0.0526316	0.105263	0	0.684211	0	0	['ast', 'ex', 'inh', 'mic', 'opc', 'oli']	['ast', 'ex', 'inh', 'mic', 'oli']
40	ENSG00000273748	novel_not_in_catalog	0	0	0	0	0	1	0	0	0.0408163	0.0612245	0.0204082	0.0204082	0	0.857143	0	0	['oli']	['ex', 'oli']
41	ENSG00000273748	novel_not_in_catalog	0	0	0	0	0	1	0	0	0	0	0	0	0	1	0	0	['oli']	['oli']
43	ENSG00000273748	novel_not_in_catalog	0.152174	0.0217391	0	0.108696	0.0217391	0.695652	0	0	0.107692	0.153846	0.0461538	0.0153846	0.0461538	0.630769	0	0	['ast', 'mic', 'oli']	['ast', 'ex', 'oli']
44	ENSG00000273748	novel_not_in_catalog	0.176471	0.294118	0.117647	0	0.117647	0.294118	0	0	0.0735294	0.161765	0.0735294	0.0147059	0.0441176	0.632353	0	0	['ast', 'ex', 'inh', 'opc', 'oli']	['ast', 'ex', 'inh', 'oli']
45	ENSG00000273748	novel_not_in_catalog	0.125	0.2	0.05	0.05	0.075	0.475	0.025	0	0.102041	0.163265	0.0612245	0.0408163	0.0612245	0.571429	0	0	['ast', 'ex', 'inh', 'mic', 'opc', 'oli']	['ast', 'ex', 'inh', 'opc', 'oli']
92	SUMO2P1	full-splice_match	0	0.6	0	0.2	0	0.2	0	0	0	0.4	0	0	0.2	0.4	0	0	['ex', 'mic', 'oli']	['ex', 'opc', 'oli']
93	MOG	novel_not_in_catalog	0	0	0	0	0	1	0	0	0	0	0	0	0	1	0	0	['oli']	['oli']
94	MOG	novel_not_in_catalog	0	0	0	0	0	1	0	0	0	0	0.0555556	0	0	0.944444	0	0	['oli']	['inh', 'oli']
95	MOG	full-splice_match	0.0263158	0	0	0	0	0.973684	0	0	0.0192308	0.0384615	0	0	0	0.923077	0	0.0192308	['oli']	['oli']
100	HLA-A	novel_not_in_catalog	0.117647	0.0588235	0	0.117647	0.294118	0.411765	0	0	0	0	0.0909091	0	0.454545	0.363636	0	0.0909091	['ast', 'ex', 'mic', 'opc', 'oli']	['end', 'inh', 'opc', 'oli']
102	POLR1HASP	full-splice_match	0	0.0833333	0.166667	0	0	0.75	0	0	0.176471	0.235294	0.235294	0	0	0.352941	0	0	['ex', 'inh', 'oli']	['ast', 'ex', 'inh', 'oli']
104	POLR1H	full-splice_match	0	0.25	0.125	0	0.25	0.25	0	0.125	0	0.333333	0	0	0.666667	0	0	0	['ex', 'end', 'inh', 'opc', 'oli']	['ex', 'opc']
117	PPP1R11	full-splice_match	0	0	0.0588235	0	0	0.941176	0	0	0.0833333	0.25	0.125	0	0	0.541667	0	0	['inh', 'oli']	['ast', 'ex', 'inh', 'oli']
118	RPP21	full-splice_match	0	0.666667	0	0	0	0.333333	0	0	0.0909091	0.272727	0.0909091	0	0.181818	0.363636	0	0	['ex', 'oli']	['ast', 'ex', 'inh', 'opc', 'oli']
119	RPP21	full-splice_match	0	0.117647	0.0294118	0	0.0588235	0.794118	0	0	0.03	0.25	0.11	0.01	0.05	0.55	0	0	['ex', 'opc', 'oli']	['ex', 'inh', 'opc', 'oli']
122	RPP21	full-splice_match	0	0.6	0	0	0	0.4	0	0	0.0588235	0.529412	0	0.0588235	0	0.352941	0	0	['ex', 'oli']	['ast', 'ex', 'mic', 'oli']
128	TUBB	full-splice_match	0.0105263	0.410526	0.142105	0.0210526	0.0684211	0.331579	0	0.0157895	0	0.4	0.28	0.02	0.06	0.24	0	0	['ex', 'inh', 'opc', 'oli']	['ex', 'inh', 'opc', 'oli']
129	FLOT1	incomplete-splice_match	0	0.529412	0.235294	0	0.0588235	0.176471	0	0	0.0769231	0.307692	0.384615	0.0769231	0	0.153846	0	0	['ex', 'inh', 'opc', 'oli']	['ast', 'ex', 'inh', 'mic', 'oli']
130	DDX39B	incomplete-splice_match	0.0707965	0.353982	0.0973451	0.079646	0.0973451	0.283186	0	0.0176991	0.0891089	0.316832	0.217822	0.029703	0.039604	0.306931	0	0	['ast', 'ex', 'inh', 'mic', 'opc', 'oli']	['ast', 'ex', 'inh', 'oli']
140	LSM2	full-splice_match	0	0.160714	0.0357143	0	0.0357143	0.767857	0	0	0.0588235	0.188235	0.0117647	0.0352941	0	0.682353	0.0117647	0.0117647	['ex', 'oli']	['ast', 'ex', 'oli']
145	HSPA1A	full-splice_match	0.119366	0.102671	0.0442404	0.0267112	0.0166945	0.685309	0.000834725	0.00417362	0.0952381	0.132653	0.0680272	0.0765306	0.0102041	0.617347	0	0	['ast', 'ex', 'oli']	['ast', 'ex', 'inh', 'mic', 'oli']
146	HSPA1B	full-splice_match	0.126016	0.178862	0.0528455	0.0487805	0.0162602	0.577236	0	0	0.165138	0.192661	0.0963303	0.16055	0.00917431	0.37156	0	0.00458716	['ast', 'ex', 'inh', 'oli']	['ast', 'ex', 'inh', 'mic', 'oli']
147	SNHG32	full-splice_match	0.0533333	0.0933333	0.0666667	0.0133333	0.0133333	0.76	0	0	0.0550459	0.100917	0.0642202	0.0183486	0.0183486	0.743119	0	0	['ast', 'ex', 'inh', 'oli']	['ast', 'ex', 'inh', 'oli']
149	SNHG32	full-splice_match	0.027027	0	0.027027	0.027027	0.027027	0.891892	0	0	0	0.25	0.125	0	0	0.625	0	0	['oli']	['ex', 'inh', 'oli']
164	PSMB8	full-splice_match	0	0	0	0	0	0.857143	0	0.142857	0.1	0	0	0.2	0.2	0.4	0	0.1	['end', 'oli']	['ast', 'end', 'mic', 'opc', 'oli']
178	PPP1R11	full-splice_match	0.0588235	0.176471	0	0	0	0.705882	0	0.0588235	0.0588235	0.294118	0.0588235	0	0.0588235	0.529412	0	0	['ast', 'ex', 'end', 'oli']	['ast', 'ex', 'inh', 'opc', 'oli']
188	ABCF1	incomplete-splice_match	0	0.125	0.1875	0	0.0625	0.625	0	0	0.0434783	0.391304	0.0869565	0.0434783	0.0434783	0.391304	0	0	['ex', 'inh', 'opc', 'oli']	['ex', 'inh', 'oli']
193	MRPS18B	full-splice_match	0.0571429	0.0285714	0	0.0285714	0.0285714	0.857143	0	0	0	0.05	0.1	0.1	0	0.7	0	0.05	['ast', 'oli']	['ex', 'end', 'inh', 'mic', 'oli']
196	MOG	full-splice_match	0	0	0	0	0	1	0	0	0	0	0	0	0.03125	0.96875	0	0	['oli']	['oli']
200	C6orf136	full-splice_match	0.0638298	0.510638	0.212766	0	0.0212766	0.191489	0	0	0.025	0.525	0.225	0	0	0.225	0	0	['ast', 'ex', 'inh', 'oli']	['ex', 'inh', 'oli']
205	TUBB	full-splice_match	0.0162602	0.601626	0.0569106	0.00813008	0.00813008	0.300813	0	0.00813008	0.039604	0.435644	0.287129	0.019802	0.019802	0.19802	0	0	['ex', 'inh', 'oli']	['ex', 'inh', 'oli']
211	MOG	novel_not_in_catalog	0	0	0	0	0	1	0	0	0	0	0	0	0	1	0	0	['oli']	['oli']
215	NFKBIL1	full-splice_match	0	0	0.25	0	0	0.75	0	0	0	0.333333	0.333333	0	0	0.333333	0	0	['inh', 'oli']	['ex', 'inh', 'oli']
220	AIF1	full-splice_match	0	0	0.166667	0.833333	0	0	0	0	0	0	0	0.818182	0	0.0909091	0	0.0909091	['inh', 'mic']	['end', 'mic', 'oli']
221	AIF1	full-splice_match	0.0714286	0.142857	0	0.785714	0	0	0	0	0	0	0	0.775	0	0.1	0	0.125	['ast', 'ex', 'mic']	['end', 'mic', 'oli']
225	PRRC2A	incomplete-splice_match	0.029703	0.386139	0.118812	0.00990099	0.00990099	0.445545	0	0	0.0186916	0.448598	0.271028	0.00934579	0	0.252336	0	0	['ex', 'inh', 'oli']	['ex', 'inh', 'oli']
227	CSNK2B	full-splice_match	0.0708661	0.141732	0.102362	0.023622	0.0393701	0.622047	0	0	0.025641	0.188034	0.153846	0.025641	0.0512821	0.547009	0	0.00854701	['ast', 'ex', 'inh', 'oli']	['ex', 'inh', 'opc', 'oli']
230	HSPA1A	full-splice_match	0.0899329	0.0791946	0.0442953	0.0684564	0.0174497	0.69396	0	0.00671141	0.0896552	0.118966	0.0465517	0.155172	0.0137931	0.57069	0	0.00517241	['ast', 'ex', 'mic', 'oli']	['ast', 'ex', 'mic', 'oli']
232	HSPA1B	full-splice_match	0.152589	0.103542	0.0599455	0.0517711	0.0163488	0.615804	0	0	0.116183	0.228216	0.0705394	0.13278	0.0248963	0.427386	0	0	['ast', 'ex', 'inh', 'mic', 'oli']	['ast', 'ex', 'inh', 'mic', 'oli']
233	HSPA1B	novel_not_in_catalog	0	0.2	0	0	0	0.8	0	0									['ex', 'oli']	[]
236	SNHG32	full-splice_match	0.0344828	0.137931	0.103448	0.0689655	0.0344828	0.62069	0	0	0	0.0416667	0.0833333	0	0.0416667	0.833333	0	0	['ex', 'inh', 'mic', 'oli']	['inh', 'oli']
237	SNHG32	full-splice_match	0.0263158	0.105263	0.0263158	0	0	0.815789	0	0.0263158	0.031746	0.0793651	0.0634921	0.0793651	0.047619	0.698413	0	0	['ex', 'oli']	['ex', 'inh', 'mic', 'oli']
242	SKIC2	incomplete-splice_match	0.230769	0.153846	0.0769231	0	0	0.538462	0	0	0.107143	0.321429	0.142857	0.0357143	0.0357143	0.321429	0.0357143	0	['ast', 'ex', 'inh', 'oli']	['ast', 'ex', 'inh', 'oli']
245	EGFL8	incomplete-splice_match	0	0	0.25	0	0	0.75	0	0	0	0	0	0	0.25	0.75	0	0	['inh', 'oli']	['opc', 'oli']
259	PSMB9	full-splice_match	0	0	0	0.125	0	0.875	0	0	0	0	0	0.176471	0.117647	0.705882	0	0	['mic', 'oli']	['mic', 'opc', 'oli']
267	HLA-A	novel_not_in_catalog	0.214286	0	0.0714286	0.142857	0	0.571429	0	0	0.181818	0	0.0454545	0.0454545	0.363636	0.318182	0	0.0454545	['ast', 'inh', 'mic', 'oli']	['ast', 'opc', 'oli']
273	HLA-DPB1	full-splice_match	0	0.545455	0.0909091	0.272727	0	0	0	0.0909091	0.0416667	0.208333	0.166667	0.458333	0	0.125	0	0	['ex', 'end', 'inh', 'mic']	['ex', 'inh', 'mic', 'oli']
287	GNL1	incomplete-splice_match	0.142857	0	0	0	0.285714	0.571429	0	0	0.166667	0	0	0.166667	0	0.666667	0	0	['ast', 'opc', 'oli']	['ast', 'mic', 'oli']
289	PPP1R10	incomplete-splice_match	0.1	0.24	0.1	0.06	0	0.48	0.02	0	0.12	0.3	0.18	0.1	0.08	0.22	0	0	['ast', 'ex', 'inh', 'mic', 'oli']	['ast', 'ex', 'inh', 'mic', 'opc', 'oli']
291	DHX16	incomplete-splice_match	0	0	0.25	0.5	0	0.25	0	0	0.166667	0.166667	0	0	0	0.666667	0	0	['inh', 'mic', 'oli']	['ast', 'ex', 'oli']
296	FLOT1	full-splice_match	0.0333333	0.233333	0.0333333	0.166667	0.0333333	0.5	0	0	0.0222222	0.288889	0.244444	0	0.0222222	0.422222	0	0	['ex', 'mic', 'oli']	['ex', 'inh', 'oli']
301	IER3	full-splice_match	0.0666667	0.266667	0.0666667	0.466667	0	0	0	0.133333	0	0.333333	0	0.555556	0	0.111111	0	0	['ast', 'ex', 'end', 'inh', 'mic']	['ex', 'mic', 'oli']
302	HCG21	novel_not_in_catalog	0.2	0	0	0	0.2	0.6	0	0	0	0	0	0	0	1	0	0	['ast', 'opc', 'oli']	['oli']
305	ABHD16A	full-splice_match	0.0444444	0.533333	0.111111	0.0222222	0.0222222	0.266667	0	0	0.0666667	0.233333	0.0666667	0.0666667	0.0333333	0.533333	0	0	['ex', 'inh', 'oli']	['ast', 'ex', 'inh', 'mic', 'oli']
309	DDAH2	full-splice_match	0.272727	0.181818	0.0909091	0.0909091	0.0909091	0.181818	0	0.0909091	0.125	0.125	0	0.125	0	0.625	0	0	['ast', 'ex', 'end', 'inh', 'mic', 'opc', 'oli']	['ast', 'ex', 'mic', 'oli']
313	CLIC1	full-splice_match	0.111111	0	0.111111	0.333333	0	0	0	0.444444	0	0	0	0.818182	0	0.181818	0	0	['ast', 'end', 'inh', 'mic']	['mic', 'oli']
315	VARS1	incomplete-splice_match	0	0.0952381	0.142857	0	0.047619	0.714286	0	0	0.0666667	0.666667	0.0666667	0.0666667	0.0666667	0.0666667	0	0	['ex', 'inh', 'oli']	['ast', 'ex', 'inh', 'mic', 'opc', 'oli']
318	LSM2	full-splice_match	0.0416667	0.0729167	0.0416667	0.0208333	0.0208333	0.802083	0	0	0.0490196	0.137255	0.0490196	0.0196078	0.0686275	0.656863	0.00980392	0.00980392	['ex', 'oli']	['ex', 'opc', 'oli']
326	EHMT2	incomplete-splice_match	0	0	0	0	0.166667	0.833333	0	0	0.0833333	0.333333	0.416667	0	0	0.166667	0	0	['opc', 'oli']	['ast', 'ex', 'inh', 'oli']
329	HLA-B	full-splice_match	0.173913	0	0.0652174	0.434783	0.130435	0.152174	0	0.0434783	0	0.222222	0.111111	0.444444	0.111111	0	0	0.111111	['ast', 'inh', 'mic', 'opc', 'oli']	['ex', 'end', 'inh', 'mic', 'opc']
330	NELFE	full-splice_match	0.0526316	0	0.0526316	0	0.0526316	0.842105	0	0	0	0	0	0.1	0.15	0.75	0	0	['ast', 'inh', 'opc', 'oli']	['mic', 'opc', 'oli']
334	NELFE	incomplete-splice_match	0.0909091	0.227273	0.0454545	0	0	0.636364	0	0	0	0.225806	0.0645161	0	0.0645161	0.645161	0	0	['ast', 'ex', 'oli']	['ex', 'inh', 'opc', 'oli']
348	PRRT1	full-splice_match	0.133333	0.2	0.0666667	0.0666667	0.0666667	0.466667	0	0	0.0833333	0.25	0	0	0.0833333	0.583333	0	0	['ast', 'ex', 'inh', 'mic', 'opc', 'oli']	['ast', 'ex', 'opc', 'oli']
351	PRRT1	full-splice_match	0	0.2	0.4	0	0	0.4	0	0	0	0.363636	0.454545	0	0	0.181818	0	0	['ex', 'inh', 'oli']	['ex', 'inh', 'oli']
361	HLA-DRB1	full-splice_match	0.0869565	0.0434783	0	0.869565	0	0	0	0	0.0786517	0.011236	0.011236	0.831461	0.011236	0.011236	0	0.0449438	['ast', 'mic']	['ast', 'mic']
370	DDX39B	incomplete-splice_match	0.0253165	0.468354	0.164557	0	0.0126582	0.329114	0	0	0.0793651	0.365079	0.269841	0.015873	0.015873	0.253968	0	0	['ex', 'inh', 'oli']	['ast', 'ex', 'inh', 'oli']
375	DDX39B	full-splice_match	0	0	0	0	0	1	0	0	0.08	0	0.16	0.04	0.04	0.68	0	0	['oli']	['ast', 'inh', 'oli']
377	HLA-DPA1	full-splice_match	0	0	0	1	0	0	0	0	0	0.0869565	0	0.869565	0	0.0434783	0	0	['mic']	['ex', 'mic']
388	ATP6V1G2	full-splice_match	0.0851064	0.244681	0.329787	0	0.0319149	0.308511	0	0	0.037594	0.443609	0.285714	0	0.0225564	0.210526	0	0	['ast', 'ex', 'inh', 'oli']	['ex', 'inh', 'oli']
400	C6orf47	full-splice_match	0.08	0.2	0.16	0	0	0.52	0	0.04	0	0.214286	0.214286	0	0.0714286	0.5	0	0	['ast', 'ex', 'inh', 'oli']	['ex', 'inh', 'opc', 'oli']
409	RING1	full-splice_match	0.132353	0.426471	0.147059	0.0294118	0.0441176	0.220588	0	0	0.2	0.1	0	0.1	0	0.6	0	0	['ast', 'ex', 'inh', 'oli']	['ast', 'ex', 'mic', 'oli']
410	RING1	novel_in_catalog	0.0434783	0.0434783	0.130435	0	0	0.782609	0	0	0.0434783	0.76087	0.195652	0	0	0	0	0	['inh', 'oli']	['ex', 'inh']
414	RPS18	full-splice_match	0.0424242	0.20303	0.0707071	0.0646465	0.0212121	0.587879	0.0010101	0.00909091	0.0354839	0.16129	0.127957	0.072043	0.0311828	0.564516	0	0.00752688	['ex', 'inh', 'mic', 'oli']	['ex', 'inh', 'mic', 'oli']
415	RPS18	incomplete-splice_match	0	0.384615	0	0.0769231	0	0.461538	0	0.0769231	0.0666667	0.133333	0.133333	0.133333	0	0.533333	0	0	['ex', 'end', 'mic', 'oli']	['ast', 'ex', 'inh', 'mic', 'oli']
420	RPS18	incomplete-splice_match	0	0.0384615	0.0769231	0.0769231	0	0.807692	0	0	0.0357143	0.107143	0.107143	0.178571	0.0714286	0.5	0	0	['inh', 'mic', 'oli']	['ex', 'inh', 'mic', 'opc', 'oli']
421	B3GALT4	full-splice_match	0	0.153846	0.153846	0.0769231	0.0769231	0.538462	0	0	0.0833333	0.0833333	0	0.0833333	0.166667	0.583333	0	0	['ex', 'inh', 'mic', 'opc', 'oli']	['ast', 'ex', 'mic', 'opc', 'oli']
426	PFDN6	full-splice_match	0.0172414	0.224138	0.0517241	0.0172414	0.0344828	0.637931	0	0.0172414	0.0126582	0.113924	0.126582	0.0379747	0.0379747	0.670886	0	0	['ex', 'inh', 'oli']	['ex', 'inh', 'oli']
428	PFDN6	full-splice_match	0	0.1	0.1	0	0.1	0.7	0	0	0	0.5	0	0	0	0.5	0	0	['ex', 'inh', 'opc', 'oli']	['ex', 'oli']
434	PFDN6	incomplete-splice_match	0.25	0.125	0.125	0	0	0.5	0	0	0	0.166667	0.333333	0	0	0.5	0	0	['ast', 'ex', 'inh', 'oli']	['ex', 'inh', 'oli']
442	RGL2	incomplete-splice_match	0.190476	0.595238	0.142857	0	0.0238095	0.0238095	0	0.0238095	0.12987	0.415584	0.207792	0.0649351	0.0519481	0.12987	0	0	['ast', 'ex', 'inh']	['ast', 'ex', 'inh', 'mic', 'opc', 'oli']
443	RGL2	incomplete-splice_match	0.388889	0.111111	0.0555556	0.111111	0.0555556	0.277778	0	0	0.142857	0.142857	0	0.285714	0.142857	0.285714	0	0	['ast', 'ex', 'inh', 'mic', 'opc', 'oli']	['ast', 'ex', 'mic', 'opc', 'oli']
447	DAXX	incomplete-splice_match	0	0	0	0.4	0	0.6	0	0	0	0.354839	0.129032	0.0322581	0.0322581	0.451613	0	0	['mic', 'oli']	['ex', 'inh', 'oli']
458	MOG	full-splice_match	0	0	0	0	0	1	0	0	0	0	0	0	0	1	0	0	['oli']	['oli']
460	MOG	novel_not_in_catalog	0.0384615	0	0	0	0	0.961538	0	0	0	0	0	0	0	1	0	0	['oli']	['oli']
470	HLA-A	full-splice_match	0.109375	0.0364583	0.078125	0.0833333	0.192708	0.479167	0	0.0208333	0.113821	0.0325203	0.097561	0.113821	0.154472	0.479675	0	0.00813008	['ast', 'inh', 'mic', 'opc', 'oli']	['ast', 'inh', 'mic', 'opc', 'oli']
479	HLA-H	novel_in_catalog	0.0625	0.0625	0.104167	0.0416667	0.104167	0.625	0	0	0.0833333	0.0208333	0.208333	0.208333	0.125	0.354167	0	0	['ast', 'ex', 'inh', 'opc', 'oli']	['ast', 'inh', 'mic', 'opc', 'oli']
480	PPP1R11	full-splice_match	0.114286	0.371429	0.0571429	0	0.0285714	0.4	0	0.0285714	0	0.25	0.2	0	0	0.55	0	0	['ast', 'ex', 'inh', 'oli']	['ex', 'inh', 'oli']
486	POLR1H	full-splice_match	0	0.2	0	0	0	0.8	0	0	0	0.285714	0.428571	0	0	0.285714	0	0	['ex', 'oli']	['ex', 'inh', 'oli']
488	RPP21	full-splice_match	0	0.125	0.125	0	0	0.75	0	0	0.0454545	0.159091	0.136364	0.0113636	0.0227273	0.625	0	0	['ex', 'inh', 'oli']	['ex', 'inh', 'oli']
494	RPP21	full-splice_match	0.25	0.5	0	0	0	0.25	0	0	0	0.428571	0.142857	0.0714286	0.0714286	0.285714	0	0	['ast', 'ex', 'oli']	['ex', 'inh', 'mic', 'opc', 'oli']
495	RPP21	full-splice_match	0.5	0.5	0	0	0	0	0	0	0.125	0.375	0.0625	0.125	0	0.3125	0	0	['ast', 'ex']	['ast', 'ex', 'inh', 'mic', 'oli']
504	ABCF1	incomplete-splice_match	0.0714286	0.142857	0.142857	0	0	0.571429	0	0.0714286	0.0833333	0.166667	0.0833333	0	0.25	0.416667	0	0	['ast', 'ex', 'end', 'inh', 'oli']	['ast', 'ex', 'inh', 'opc', 'oli']
509	MRPS18B	full-splice_match	0	0.193548	0	0.0322581	0.0645161	0.709677	0	0	0.05	0	0.05	0	0	0.9	0	0	['ex', 'opc', 'oli']	['ast', 'inh', 'oli']
513	C6orf136	full-splice_match	0.0909091	0.477273	0.181818	0.0227273	0	0.227273	0	0	0	0.466667	0.0666667	0	0	0.466667	0	0	['ast', 'ex', 'inh', 'oli']	['ex', 'inh', 'oli']
517	novelGene_IER3_AS	antisense	0.333333	0.666667	0	0	0	0	0	0	0.125	0.625	0.125	0	0	0.125	0	0	['ast', 'ex']	['ast', 'ex', 'inh', 'oli']
541	PPP1R10	incomplete-splice_match	0.148148	0.444444	0.037037	0.148148	0	0.222222	0	0	0.136364	0.318182	0.0909091	0.0454545	0	0.409091	0	0	['ast', 'ex', 'mic', 'oli']	['ast', 'ex', 'inh', 'oli']
545	FLOT1	full-splice_match	0.00862069	0.551724	0.146552	0.0258621	0.00862069	0.258621	0	0	0	0.111111	0.111111	0.111111	0	0.666667	0	0	['ex', 'inh', 'oli']	['ex', 'inh', 'mic', 'oli']
546	FLOT1	incomplete-splice_match	0.0769231	0.538462	0.230769	0.0384615	0	0.115385	0	0	0	1	0	0	0	0	0	0	['ast', 'ex', 'inh', 'oli']	['ex']
553	IER3	full-splice_match	0	0.25	0.25	0.375	0	0.125	0	0	0.214286	0.142857	0.0714286	0.428571	0.0714286	0.0714286	0	0	['ex', 'inh', 'mic', 'oli']	['ast', 'ex', 'inh', 'mic', 'opc', 'oli']
555	POLR1HASP	full-splice_match	0.0454545	0.181818	0.227273	0	0	0.545455	0	0	0	0	0	0	0	1	0	0	['ex', 'inh', 'oli']	['oli']
560	DDX39B	incomplete-splice_match	0.0952381	0.238095	0.0714286	0.0714286	0.0714286	0.452381	0	0	0.0810811	0.297297	0.216216	0	0.027027	0.378378	0	0	['ast', 'ex', 'inh', 'mic', 'opc', 'oli']	['ast', 'ex', 'inh', 'oli']
571	ATP6V1G2	full-splice_match	0.0454545	0.664773	0.1875	0	0.0113636	0.0852273	0	0.00568182	0.00862069	0.560345	0.206897	0	0.0344828	0.189655	0	0	['ex', 'inh', 'oli']	['ex', 'inh', 'oli']
577	NFKBIL1	full-splice_match	0	0	0.333333	0	0	0.666667	0	0	0.0769231	0.307692	0.153846	0	0.0769231	0.384615	0	0	['inh', 'oli']	['ast', 'ex', 'inh', 'opc', 'oli']
581	AIF1	full-splice_match	0	0.111111	0	0.777778	0	0.111111	0	0	0.0625	0	0	0.84375	0	0.03125	0	0.0625	['ex', 'mic', 'oli']	['ast', 'end', 'mic']
588	PRRC2A	incomplete-splice_match	0.333333	0.5	0	0	0	0.166667	0	0	0	0.5	0	0	0	0.5	0	0	['ast', 'ex', 'oli']	['ex', 'oli']
598	C6orf47	full-splice_match	0.037037	0.0740741	0.0740741	0	0.0740741	0.740741	0	0	0	0.25	0.25	0	0.125	0.375	0	0	['ex', 'inh', 'opc', 'oli']	['ex', 'inh', 'opc', 'oli']
602	CSNK2B	novel_in_catalog	0.3	0.1	0.1	0	0	0.4	0	0.1	0.0952381	0.285714	0.142857	0.047619	0.142857	0.285714	0	0	['ast', 'ex', 'end', 'inh', 'oli']	['ast', 'ex', 'inh', 'opc', 'oli']
603	CSNK2B	full-splice_match	0.027027	0.18018	0.0630631	0.00900901	0.0720721	0.648649	0	0	0.0314961	0.212598	0.102362	0.015748	0.0551181	0.566929	0.00787402	0.00787402	['ex', 'inh', 'opc', 'oli']	['ex', 'inh', 'opc', 'oli']
610	ABHD16A	full-splice_match	0.0666667	0.433333	0.0833333	0.0166667	0.0666667	0.333333	0	0	0.0454545	0.136364	0.0909091	0	0.136364	0.590909	0	0	['ast', 'ex', 'inh', 'opc', 'oli']	['ex', 'inh', 'opc', 'oli']
615	CLIC1	full-splice_match	0.333333	0	0	0.333333	0	0	0	0.333333	0	0.0909091	0	0.545455	0	0	0	0.363636	['ast', 'end', 'mic']	['ex', 'end', 'mic']
619	LSM2	full-splice_match	0.0729167	0.125	0.0416667	0.0104167	0.03125	0.71875	0	0	0.0531915	0.138298	0.0425532	0.0106383	0.0319149	0.723404	0	0	['ast', 'ex', 'oli']	['ast', 'ex', 'oli']
623	HSPA1A	full-splice_match	0.0766423	0.20438	0.0474453	0.0656934	0.0109489	0.587591	0	0.00729927	0.107623	0.112108	0.0538117	0.269058	0.0134529	0.434978	0	0.00896861	['ast', 'ex', 'mic', 'oli']	['ast', 'ex', 'inh', 'mic', 'oli']
625	HSPA1B	full-splice_match	0.105769	0.0961538	0.0336538	0.0745192	0.0192308	0.661058	0	0.00961538	0.137195	0.164634	0.0396341	0.207317	0.00304878	0.448171	0	0	['ast', 'ex', 'mic', 'oli']	['ast', 'ex', 'mic', 'oli']
627	SNHG32	full-splice_match	0.0235294	0.141176	0.152941	0.0235294	0	0.658824	0	0	0.0325203	0.186992	0.0650407	0.0243902	0	0.691057	0	0	['ex', 'inh', 'oli']	['ex', 'inh', 'oli']
629	SNHG32	full-splice_match	0	0	0	0	0	1	0	0	0	0.117647	0.0588235	0.0588235	0.117647	0.647059	0	0	['oli']	['ex', 'inh', 'mic', 'opc', 'oli']
632	NEU1	full-splice_match	0	0.307692	0.307692	0	0	0.384615	0	0	0.222222	0.111111	0.111111	0.111111	0.222222	0.222222	0	0	['ex', 'inh', 'oli']	['ast', 'ex', 'inh', 'mic', 'opc', 'oli']
633	NEU1	incomplete-splice_match	0.25	0	0.25	0	0	0.5	0	0	0.0769231	0.692308	0.153846	0.0769231	0	0	0	0	['ast', 'inh', 'oli']	['ast', 'ex', 'inh', 'mic']
639	NELFE	full-splice_match	0	0	0.153846	0	0.153846	0.692308	0	0	0.0526316	0.0526316	0.0526316	0	0.0526316	0.789474	0	0	['inh', 'opc', 'oli']	['ast', 'ex', 'inh', 'opc', 'oli']
641	NELFE	incomplete-splice_match	0.181818	0.0909091	0.0909091	0	0	0.545455	0	0.0909091	0.0833333	0.0833333	0	0	0.0833333	0.75	0	0	['ast', 'ex', 'end', 'inh', 'oli']	['ast', 'ex', 'opc', 'oli']
642	SKIC2	incomplete-splice_match	0	0	0.166667	0.166667	0	0.666667	0	0	0.166667	0.416667	0.25	0	0	0.166667	0	0	['inh', 'mic', 'oli']	['ast', 'ex', 'inh', 'oli']
653	ATF6B	full-splice_match	0.0512821	0.461538	0.205128	0	0	0.25641	0	0.025641	0.105263	0.421053	0.210526	0	0	0.263158	0	0	['ast', 'ex', 'inh', 'oli']	['ast', 'ex', 'inh', 'oli']
667	PSMB9	full-splice_match	0	0	0	0.0833333	0.0833333	0.833333	0	0	0	0	0.0588235	0	0.117647	0.823529	0	0	['mic', 'opc', 'oli']	['inh', 'opc', 'oli']
673	HLA-DMA	full-splice_match									0.133333	0	0	0.8	0	0.0666667	0	0	[]	['ast', 'mic', 'oli']
677	BRD2	incomplete-splice_match	0	0	0	0.0952381	0.0238095	0.880952	0	0	0.0945946	0.0945946	0.175676	0.0405405	0.0675676	0.513514	0	0.0135135	['mic', 'oli']	['ast', 'ex', 'inh', 'opc', 'oli']
681	HLA-DPA1	incomplete-splice_match	0	0	0	0.909091	0	0	0	0.0909091	0	0	0	0.9	0	0.1	0	0	['end', 'mic']	['mic', 'oli']
689	RING1	full-splice_match	0.18	0.3	0.12	0.02	0.02	0.36	0	0	0.111111	0.111111	0.111111	0	0.111111	0.555556	0	0	['ast', 'ex', 'inh', 'oli']	['ast', 'ex', 'inh', 'opc', 'oli']
691	RING1	incomplete-splice_match	0.166667	0.166667	0.333333	0	0.166667	0.166667	0	0	0.222222	0.333333	0.111111	0.111111	0	0.222222	0	0	['ast', 'ex', 'inh', 'opc', 'oli']	['ast', 'ex', 'inh', 'mic', 'oli']
698	RPS18	incomplete-splice_match	0.037037	0.111111	0.037037	0.111111	0.148148	0.555556	0	0	0.0952381	0.285714	0.047619	0.0952381	0	0.47619	0	0	['ex', 'mic', 'opc', 'oli']	['ast', 'ex', 'mic', 'oli']
700	RPS18	full-splice_match	0.048951	0.18007	0.0681818	0.048951	0.020979	0.618007	0	0.0148601	0.0455655	0.183889	0.08869	0.0667209	0.0366151	0.569569	0.00162734	0.00732303	['ex', 'inh', 'oli']	['ex', 'inh', 'mic', 'oli']
705	B3GALT4	full-splice_match	0.103448	0.137931	0.0689655	0	0	0.689655	0	0	0.05	0.1	0.05	0.1	0.05	0.65	0	0	['ast', 'ex', 'inh', 'oli']	['ast', 'ex', 'inh', 'mic', 'opc', 'oli']
712	PFDN6	full-splice_match	0.025641	0.153846	0.025641	0.025641	0	0.769231	0	0	0.0128205	0.179487	0.141026	0.0384615	0.0384615	0.564103	0.025641	0	['ex', 'oli']	['ex', 'inh', 'oli']
715	PFDN6	incomplete-splice_match	0.166667	0.416667	0.166667	0.0833333	0	0.166667	0	0	0	0	0.333333	0.333333	0	0.333333	0	0	['ast', 'ex', 'inh', 'mic', 'oli']	['inh', 'mic', 'oli']
720	PFDN6	full-splice_match	0.09375	0.25	0.09375	0	0.03125	0.53125	0	0	0.0357143	0.107143	0.142857	0	0.0357143	0.678571	0	0	['ast', 'ex', 'inh', 'oli']	['ex', 'inh', 'oli']
721	PFDN6	full-splice_match	0.2	0.2	0.2	0	0.2	0.2	0	0	0.333333	0.333333	0.333333	0	0	0	0	0	['ast', 'ex', 'inh', 'opc', 'oli']	['ast', 'ex', 'inh']
724	PFDN6	incomplete-splice_match	0.166667	0.333333	0	0	0	0.5	0	0	0	0.2	0.2	0	0	0.6	0	0	['ast', 'ex', 'oli']	['ex', 'inh', 'oli']
727	RGL2	incomplete-splice_match	0.316547	0.201439	0.172662	0.122302	0.028777	0.136691	0.00719424	0.0143885	0.2	0.288889	0.2	0.133333	0.0444444	0.133333	0	0	['ast', 'ex', 'inh', 'mic', 'oli']	['ast', 'ex', 'inh', 'mic', 'oli']
732	DAXX	incomplete-splice_match	0	0.633333	0.0666667	0	0	0.3	0	0	0.0588235	0.294118	0.176471	0	0.0588235	0.411765	0	0	['ex', 'inh', 'oli']	['ast', 'ex', 'inh', 'opc', 'oli']
734	MOG	full-splice_match	0	0	0	0	0	1	0	0	0	0	0	0	0.0178571	0.982143	0	0	['oli']	['oli']
735	MOG	novel_not_in_catalog	0	0	0	0	0	1	0	0	0	0.0285714	0	0	0	0.971429	0	0	['oli']	['oli']
737	MOG	novel_not_in_catalog	0	0	0	0	0	1	0	0	0	0	0	0	0	1	0	0	['oli']	['oli']
747	POLR1HASP	full-splice_match	0.0909091	0.227273	0.181818	0	0	0.5	0	0	0.0952381	0.380952	0.0952381	0	0	0.428571	0	0	['ast', 'ex', 'inh', 'oli']	['ast', 'ex', 'inh', 'oli']
753	POLR1H	full-splice_match	0.125	0.125	0.375	0	0.125	0	0	0.25	0.25	0.5	0	0	0	0.25	0	0	['ast', 'ex', 'end', 'inh', 'opc']	['ast', 'ex', 'oli']
768	ABCF1	incomplete-splice_match	0.125	0.416667	0.0833333	0	0	0.375	0	0	0.130435	0.173913	0.26087	0.0434783	0.0434783	0.347826	0	0	['ast', 'ex', 'inh', 'oli']	['ast', 'ex', 'inh', 'oli']
772	PPP1R10	incomplete-splice_match	0.0662252	0.410596	0.0463576	0.0529801	0.0397351	0.377483	0	0.00662252	0.0760234	0.292398	0.0994152	0.0526316	0.0526316	0.426901	0	0	['ast', 'ex', 'mic', 'oli']	['ast', 'ex', 'inh', 'mic', 'opc', 'oli']
774	MRPS18B	full-splice_match	0.113636	0.136364	0	0.0681818	0.0681818	0.613636	0	0	0	0.21875	0.03125	0.03125	0	0.71875	0	0	['ast', 'ex', 'mic', 'opc', 'oli']	['ex', 'oli']
776	C6orf136	full-splice_match	0	0.709677	0.193548	0	0	0.0967742	0	0	0	0	0	0	0	0.8	0	0.2	['ex', 'inh', 'oli']	['end', 'oli']
777	TUBB	full-splice_match	0.0496454	0.567376	0.170213	0.0141844	0.0212766	0.177305	0	0	0.05	0.15	0.3	0.025	0.1	0.375	0	0	['ex', 'inh', 'oli']	['ast', 'ex', 'inh', 'opc', 'oli']
779	FLOT1	incomplete-splice_match	0.0625	0.53125	0.15625	0	0.03125	0.21875	0	0	0	0.333333	0.333333	0	0	0.333333	0	0	['ast', 'ex', 'inh', 'oli']	['ex', 'inh', 'oli']
781	FLOT1	full-splice_match	0.03	0.34	0.07	0.02	0.04	0.49	0	0.01	0.056338	0.408451	0.169014	0.028169	0	0.338028	0	0	['ex', 'inh', 'oli']	['ast', 'ex', 'inh', 'oli']
782	FLOT1	incomplete-splice_match	0.15	0.5	0.05	0	0	0.3	0	0	0.0333333	0.6	0.133333	0	0	0.233333	0	0	['ast', 'ex', 'inh', 'oli']	['ex', 'inh', 'oli']
785	IER3	full-splice_match	0.047619	0.333333	0.047619	0.380952	0	0.0952381	0	0.0952381	0.142857	0.428571	0.0714286	0.285714	0.0714286	0	0	0	['ex', 'end', 'mic', 'oli']	['ast', 'ex', 'inh', 'mic', 'opc']
791	DDR1	incomplete-splice_match	0.208333	0.0416667	0.166667	0	0	0.583333	0	0	0	0	0	0	0	1	0	0	['ast', 'inh', 'oli']	['oli']
792	DDR1	incomplete-splice_match	0.285714	0.142857	0.142857	0	0.178571	0.25	0	0	0.0888889	0.037037	0.0444444	0.00740741	0.0518519	0.77037	0	0	['ast', 'ex', 'inh', 'opc', 'oli']	['ast', 'opc', 'oli']
805	NFKBIL1	full-splice_match	0.166667	0	0	0.0833333	0	0.75	0	0	0.125	0.3125	0	0	0	0.5625	0	0	['ast', 'mic', 'oli']	['ast', 'ex', 'oli']
817	CSNK2B	full-splice_match	0.027027	0.135135	0.126126	0.018018	0.045045	0.648649	0	0	0.0105263	0.263158	0.0631579	0.0105263	0.0315789	0.610526	0.0105263	0	['ex', 'inh', 'oli']	['ex', 'inh', 'oli']
821	CSNK2B	novel_in_catalog	0.0909091	0.0454545	0.318182	0	0	0.545455	0	0	0.0588235	0.294118	0.470588	0	0	0.176471	0	0	['ast', 'inh', 'oli']	['ast', 'ex', 'inh', 'oli']
834	DDX39B	full-splice_match	0.030303	0.515152	0.181818	0.0454545	0.0151515	0.19697	0	0.0151515	0.0967742	0.0322581	0.0645161	0.0645161	0.0645161	0.677419	0	0	['ex', 'inh', 'oli']	['ast', 'inh', 'mic', 'opc', 'oli']
839	ATP6V1G2	full-splice_match	0	0.675439	0.184211	0.00877193	0.00877193	0.122807	0	0	0.0223881	0.567164	0.231343	0.00746269	0.0223881	0.149254	0	0	['ex', 'inh', 'oli']	['ex', 'inh', 'oli']
851	C6orf47	full-splice_match	0.0869565	0.0869565	0.347826	0	0.0434783	0.434783	0	0	0	0.222222	0.277778	0	0	0.5	0	0	['ast', 'ex', 'inh', 'oli']	['ex', 'inh', 'oli']
855	CLIC1	full-splice_match	0	0	0	0.5	0	0	0	0.5	0	0	0	0.666667	0.0833333	0	0.0833333	0.166667	['end', 'mic']	['end', 'mic', 'opc', 'per']
869	PSMB9	full-splice_match	0	0	0	0.0769231	0	0.769231	0	0.153846	0	0	0	0.1	0.1	0.7	0	0.1	['end', 'mic', 'oli']	['end', 'mic', 'opc', 'oli']
878	BRD2	incomplete-splice_match	0.0769231	0.307692	0	0	0	0.615385	0	0	0.0625	0.25	0.1875	0.0625	0	0.4375	0	0	['ast', 'ex', 'oli']	['ast', 'ex', 'inh', 'mic', 'oli']
879	BRD2	full-splice_match	0.125	0.375	0.125	0	0.125	0.25	0	0	0.142857	0.142857	0.428571	0	0	0.285714	0	0	['ast', 'ex', 'inh', 'opc', 'oli']	['ast', 'ex', 'inh', 'oli']
884	SLC39A7	incomplete-splice_match	0.111111	0	0	0	0.222222	0.666667	0	0	0	0.2	0	0	0.2	0.6	0	0	['ast', 'opc', 'oli']	['ex', 'opc', 'oli']
888	RING1	incomplete-splice_match	0.285714	0.142857	0.142857	0.142857	0	0.285714	0	0	0	0.666667	0.333333	0	0	0	0	0	['ast', 'ex', 'inh', 'mic', 'oli']	['ex', 'inh']
891	RING1	incomplete-splice_match	0.162791	0.410853	0.155039	0.0465116	0.0232558	0.193798	0	0.00775194	0.0769231	0.480769	0.288462	0	0	0.153846	0	0	['ast', 'ex', 'inh', 'oli']	['ast', 'ex', 'inh', 'oli']
892	VPS52	incomplete-splice_match	0.380952	0	0.190476	0.0952381	0.047619	0.285714	0	0	0.0833333	0.0416667	0.125	0.0416667	0.0416667	0.666667	0	0	['ast', 'inh', 'mic', 'oli']	['ast', 'inh', 'oli']
893	TRIM27	full-splice_match	0.0735294	0.279412	0.0588235	0.0588235	0.117647	0.411765	0	0	0.0377358	0.358491	0.207547	0.0566038	0.0188679	0.301887	0.0188679	0	['ast', 'ex', 'inh', 'mic', 'opc', 'oli']	['ex', 'inh', 'mic', 'oli']
894	TRIM27	incomplete-splice_match	0.166667	0	0.166667	0	0.166667	0.5	0	0	0	0.555556	0.222222	0	0.111111	0.111111	0	0	['ast', 'inh', 'opc', 'oli']	['ex', 'inh', 'opc', 'oli']
904	MOG	full-splice_match	0	0	0	0	0	1	0	0	0	0.0240964	0.0120482	0	0	0.963855	0	0	['oli']	['oli']
918	HLA-A	incomplete-splice_match	0.166667	0.166667	0.222222	0.111111	0.0555556	0.111111	0.0555556	0.111111	0.15	0.0333333	0.175	0.108333	0.2	0.325	0	0.00833333	['ast', 'ex', 'end', 'inh', 'mic', 'opc', 'oli', 'per']	['ast', 'inh', 'mic', 'opc', 'oli']
922	HLA-A	incomplete-splice_match	0	0.25	0	0	0	0.75	0	0	0.0666667	0.166667	0.3	0.1	0.1	0.233333	0	0.0333333	['ex', 'oli']	['ast', 'ex', 'inh', 'mic', 'opc', 'oli']
928	POLR1H	full-splice_match	0	0	0	0	0.25	0.75	0	0	0	0.4	0.2	0	0	0.4	0	0	['opc', 'oli']	['ex', 'inh', 'oli']
933	POLR1HASP	full-splice_match	0	0.333333	0.125	0	0.0416667	0.5	0	0	0	0.230769	0.0769231	0	0.0769231	0.615385	0	0	['ex', 'inh', 'oli']	['ex', 'inh', 'opc', 'oli']
941	ABCF1	incomplete-splice_match	0.0606061	0.30303	0.030303	0.030303	0.030303	0.515152	0	0.030303	0.105263	0.105263	0.157895	0	0.105263	0.526316	0	0	['ast', 'ex', 'oli']	['ast', 'ex', 'inh', 'opc', 'oli']
942	ABCF1	incomplete-splice_match	0	0.166667	0	0.166667	0	0.666667	0	0	0	0.2	0.6	0	0.2	0	0	0	['ex', 'mic', 'oli']	['ex', 'inh', 'opc']
945	MRPS18B	full-splice_match	0	0	0	0	0	1	0	0	0.0666667	0	0.0666667	0	0.0666667	0.8	0	0	['oli']	['ast', 'inh', 'opc', 'oli']
950	C6orf136	full-splice_match	0.105263	0.0526316	0.210526	0	0.0526316	0.578947	0	0	0	0.142857	0.142857	0	0	0.714286	0	0	['ast', 'ex', 'inh', 'opc', 'oli']	['ex', 'inh', 'oli']
956	NFKBIL1	incomplete-splice_match	0.0666667	0.133333	0.133333	0	0	0.666667	0	0	0.4	0	0.2	0	0	0.4	0	0	['ast', 'ex', 'inh', 'oli']	['ast', 'inh', 'oli']
957	AIF1	full-splice_match	0	0.111111	0	0.888889	0	0	0	0	0.0526316	0	0	0.947368	0	0	0	0	['ex', 'mic']	['ast', 'mic']
965	PRRC2A	incomplete-splice_match	0.149533	0.242991	0.214953	0.046729	0.0280374	0.317757	0	0	0.027027	0.351351	0.162162	0.0135135	0.0675676	0.378378	0	0	['ast', 'ex', 'inh', 'oli']	['ex', 'inh', 'opc', 'oli']
981	STK19B	incomplete-splice_match	0.12	0.52	0.28	0	0	0.08	0	0	0.166667	0.583333	0.25	0	0	0	0	0	['ast', 'ex', 'inh', 'oli']	['ast', 'ex', 'inh']
984	EGFL8	incomplete-splice_match	0.12	0.4	0.24	0	0.08	0.16	0	0	0.105263	0.263158	0.157895	0.0526316	0	0.421053	0	0	['ast', 'ex', 'inh', 'opc', 'oli']	['ast', 'ex', 'inh', 'mic', 'oli']
988	GNL1	incomplete-splice_match	0	0	0.1	0	0	0.9	0	0	0.1	0.5	0.1	0.1	0	0.2	0	0	['inh', 'oli']	['ast', 'ex', 'inh', 'mic', 'oli']
991	PPP1R10	incomplete-splice_match	0.117647	0.420168	0.0840336	0.0588235	0.0168067	0.302521	0	0	0.0689655	0.275862	0.12069	0.103448	0.0258621	0.396552	0.00862069	0	['ast', 'ex', 'inh', 'mic', 'oli']	['ast', 'ex', 'inh', 'mic', 'oli']
996	PPP1R18	full-splice_match	0	0	0	0.75	0	0.25	0	0	0	0	0	0.666667	0.166667	0.166667	0	0	['mic', 'oli']	['mic', 'opc', 'oli']
997	MDC1	incomplete-splice_match	0	0.142857	0.214286	0.0714286	0	0.571429	0	0	0.25	0.25	0	0	0	0.5	0	0	['ex', 'inh', 'mic', 'oli']	['ast', 'ex', 'oli']
1002	DDAH2	full-splice_match	0.166667	0.333333	0	0	0.166667	0.333333	0	0	0.1	0.1	0	0.1	0.1	0.5	0	0.1	['ast', 'ex', 'opc', 'oli']	['ast', 'ex', 'end', 'mic', 'opc', 'oli']
1004	CLIC1	full-splice_match	0.166667	0	0	0.833333	0	0	0	0	0	0	0	1	0	0	0	0	['ast', 'mic']	['mic']
1008	LSM2	full-splice_match	0.0588235	0.117647	0.0441176	0.0294118	0.0441176	0.705882	0	0	0.03125	0.125	0.0625	0.0416667	0.0520833	0.6875	0	0	['ast', 'ex', 'oli']	['ex', 'inh', 'opc', 'oli']
1011	NEU1	full-splice_match	0.166667	0.166667	0.5	0	0.166667	0	0	0	0	0.411765	0.235294	0.0588235	0.0588235	0.235294	0	0	['ast', 'ex', 'inh', 'opc']	['ex', 'inh', 'mic', 'opc', 'oli']
1014	EHMT2	incomplete-splice_match	0.0967742	0.677419	0.193548	0	0	0.0322581	0	0	0.04	0.76	0.16	0	0	0.04	0	0	['ast', 'ex', 'inh']	['ex', 'inh']
1018	NELFE	full-splice_match	0	0	0	0.2	0.2	0.6	0	0	0	0	0	0	0.142857	0.857143	0	0	['mic', 'opc', 'oli']	['opc', 'oli']
1021	NELFE	incomplete-splice_match	0.142857	0.047619	0.047619	0.047619	0.0952381	0.619048	0	0	0.0465116	0.0930233	0.116279	0	0.0465116	0.697674	0	0	['ast', 'opc', 'oli']	['ex', 'inh', 'oli']
1031	HLA-C	full-splice_match	0.0819672	0.0327869	0.0163934	0.163934	0.163934	0.491803	0	0.0491803	0.121212	0.222222	0.0707071	0.252525	0.161616	0.151515	0	0.020202	['ast', 'mic', 'opc', 'oli']	['ast', 'ex', 'inh', 'mic', 'opc', 'oli']
1041	DDX39B	incomplete-splice_match	0.125	0.375	0	0.125	0	0.25	0	0.125	0	0.428571	0.285714	0.0357143	0.0357143	0.214286	0	0	['ast', 'ex', 'end', 'mic', 'oli']	['ex', 'inh', 'oli']
1047	ATP6V1G2	full-splice_match	0.0227273	0.734848	0.166667	0	0.0151515	0.0606061	0	0	0.0191083	0.643312	0.210191	0.00636943	0.0127389	0.10828	0	0	['ex', 'inh', 'oli']	['ex', 'inh', 'oli']
1054	C6orf47	full-splice_match	0.0909091	0.0909091	0.0909091	0.0454545	0	0.636364	0	0.0454545	0	0.047619	0.190476	0	0.0952381	0.666667	0	0	['ast', 'ex', 'inh', 'oli']	['inh', 'opc', 'oli']
1055	ABHD16A	full-splice_match	0.0833333	0.3125	0.0833333	0.0208333	0	0.5	0	0	0.125	0.125	0.125	0	0.375	0.25	0	0	['ast', 'ex', 'inh', 'oli']	['ast', 'ex', 'inh', 'opc', 'oli']
1063	PSMB8	full-splice_match	0.166667	0	0	0	0.25	0.583333	0	0	0.0526316	0	0.0526316	0.157895	0.263158	0.263158	0.0526316	0.157895	['ast', 'opc', 'oli']	['ast', 'end', 'inh', 'mic', 'opc', 'oli', 'per']
1068	BRD2	incomplete-splice_match	0.0344828	0.172414	0.172414	0.0344828	0	0.586207	0	0	0	0.230769	0.307692	0	0	0.461538	0	0	['ex', 'inh', 'oli']	['ex', 'inh', 'oli']
1069	HLA-DPA1	incomplete-splice_match	0	0	0.0833333	0.75	0	0.0833333	0	0.0833333	0.05	0	0	0.9	0	0.05	0	0	['end', 'inh', 'mic', 'oli']	['ast', 'mic', 'oli']
1072	SLC39A7	full-splice_match	0	0.0714286	0.0357143	0.0714286	0.0714286	0.75	0	0	0	0	0.111111	0.111111	0.111111	0.666667	0	0	['ex', 'mic', 'opc', 'oli']	['inh', 'mic', 'opc', 'oli']
1077	RING1	incomplete-splice_match	0.25	0	0.25	0	0	0.5	0	0	0.25	0.125	0.125	0	0.125	0.375	0	0	['ast', 'inh', 'oli']	['ast', 'ex', 'inh', 'opc', 'oli']
1081	VPS52	incomplete-splice_match	0.0909091	0.0909091	0.0454545	0.0454545	0.0454545	0.681818	0	0	0.0454545	0.363636	0.181818	0	0.0454545	0.363636	0	0	['ast', 'ex', 'oli']	['ex', 'inh', 'oli']
1082	RPS18	full-splice_match	0.0254403	0.262231	0.0782779	0.0567515	0.0195695	0.53816	0.00391389	0.0156556	0.0351391	0.20205	0.102489	0.0849195	0.0351391	0.524158	0.00292826	0.0131772	['ex', 'inh', 'mic', 'oli']	['ex', 'inh', 'mic', 'oli']
1083	RPS18	incomplete-splice_match	0	0	0	0	0	1	0	0	0	0.142857	0.285714	0.142857	0	0.428571	0	0	['oli']	['ex', 'inh', 'mic', 'oli']
1085	RPS18	incomplete-splice_match	0	0.307692	0	0.0769231	0	0.384615	0	0.230769	0.0588235	0.235294	0.117647	0.0588235	0	0.470588	0	0.0588235	['ex', 'end', 'mic', 'oli']	['ast', 'ex', 'end', 'inh', 'mic', 'oli']
1087	RPS18	full-splice_match	0.5	0.166667	0	0	0	0.333333	0	0	0	0.4	0	0	0	0.6	0	0	['ast', 'ex', 'oli']	['ex', 'oli']
1090	B3GALT4	full-splice_match	0.0714286	0.178571	0.0357143	0.0357143	0.107143	0.571429	0	0	0.153846	0.230769	0.0384615	0	0	0.576923	0	0	['ast', 'ex', 'opc', 'oli']	['ast', 'ex', 'oli']
1091	WDR46	incomplete-splice_match									0.0588235	0.735294	0.147059	0.0294118	0	0.0294118	0	0	[]	['ast', 'ex', 'inh']
1093	PFDN6	full-splice_match	0	0.333333	0.166667	0	0	0.5	0	0	0	0.0454545	0.272727	0.0454545	0.0909091	0.545455	0	0	['ex', 'inh', 'oli']	['inh', 'opc', 'oli']
1097	PFDN6	full-splice_match	0	0.166667	0	0.333333	0.166667	0.333333	0	0	0	0.6	0.2	0	0	0.2	0	0	['ex', 'mic', 'opc', 'oli']	['ex', 'inh', 'oli']
1099	PFDN6	full-splice_match	0.0892857	0.0357143	0.0357143	0.0535714	0.0357143	0.75	0	0	0.0379747	0.21519	0.126582	0.0379747	0.0379747	0.544304	0	0	['ast', 'mic', 'oli']	['ex', 'inh', 'oli']
1101	PFDN6	incomplete-splice_match									0	0.285714	0.142857	0	0	0.571429	0	0	[]	['ex', 'inh', 'oli']
1104	PFDN6	novel_not_in_catalog	0	0	0	0	0	1	0	0	0.111111	0	0	0	0	0.888889	0	0	['oli']	['ast', 'oli']
1110	DAXX	incomplete-splice_match	0.030303	0.30303	0.151515	0.030303	0.0606061	0.363636	0.030303	0.030303	0.075	0.5	0.15	0.075	0	0.2	0	0	['ex', 'inh', 'opc', 'oli']	['ast', 'ex', 'inh', 'mic', 'oli']
1127	MOG	full-splice_match	0	0	0.0434783	0	0	0.956522	0	0	0	0	0	0	0	1	0	0	['oli']	['oli']
1128	MOG	novel_not_in_catalog	0	0	0	0.0243902	0	0.97561	0	0	0	0	0	0	0	1	0	0	['oli']	['oli']
1129	MOG	novel_not_in_catalog	0	0	0	0	0	1	0	0	0	0	0	0.047619	0	0.952381	0	0	['oli']	['oli']
1132	MOG	incomplete-splice_match	0	0	0	0	0	1	0	0	0	0.105263	0	0	0	0.894737	0	0	['oli']	['ex', 'oli']
1133	MOG	novel_not_in_catalog	0	0	0	0	0	1	0	0	0	0	0	0	0	1	0	0	['oli']	['oli']
1137	RPP21	full-splice_match	0.0243902	0.121951	0.0731707	0.0487805	0.0243902	0.707317	0	0	0.0106383	0.170213	0.0957447	0.0744681	0.0212766	0.62766	0	0	['ex', 'inh', 'oli']	['ex', 'inh', 'mic', 'oli']
1140	RPP21	full-splice_match	0.142857	0.142857	0	0.142857	0	0.571429	0	0	0	0.5	0.142857	0	0.107143	0.25	0	0	['ast', 'ex', 'mic', 'oli']	['ex', 'inh', 'opc', 'oli']
1142	RPP21	full-splice_match	0	0.714286	0	0	0	0.285714	0	0	0	0.307692	0.153846	0	0.0769231	0.461538	0	0	['ex', 'oli']	['ex', 'inh', 'opc', 'oli']
1155	ABCF1	full-splice_match	0.111111	0	0	0	0.111111	0.777778	0	0	0.25	0	0.25	0	0	0.5	0	0	['ast', 'opc', 'oli']	['ast', 'inh', 'oli']
1157	MRPS18B	full-splice_match	0.125	0	0	0	0	0.875	0	0	0	0	0	0.047619	0	0.952381	0	0	['ast', 'oli']	['oli']
1159	ABCF1	incomplete-splice_match	0	0.333333	0	0	0	0.666667	0	0	0	0	0.2	0	0	0.8	0	0	['ex', 'oli']	['inh', 'oli']
1163	C6orf136	full-splice_match	0.0714286	0.214286	0.142857	0.107143	0	0.464286	0	0	0.0357143	0.214286	0.357143	0.0357143	0	0.357143	0	0	['ast', 'ex', 'inh', 'mic', 'oli']	['ex', 'inh', 'oli']
1165	ABCF1	incomplete-splice_match	0	0.4	0	0.2	0	0.4	0	0	0	0.272727	0.181818	0	0	0.545455	0	0	['ex', 'mic', 'oli']	['ex', 'inh', 'oli']
1167	TUBB	full-splice_match	0.0422018	0.590826	0.0899083	0.0110092	0.0275229	0.229358	0	0.00917431	0.0308748	0.444254	0.15952	0.0325901	0.0377358	0.295026	0	0	['ex', 'inh', 'oli']	['ex', 'inh', 'oli']
1168	novelGene_IER3_AS	antisense	0	0	0	0	0	1	0	0	0.125	0.125	0.25	0	0	0.5	0	0	['oli']	['ast', 'ex', 'inh', 'oli']
1172	DDR1	incomplete-splice_match	0.03	0.005	0.005	0.005	0.04	0.915	0	0	0.130435	0.217391	0.0869565	0.0434783	0.0869565	0.434783	0	0	['oli']	['ast', 'ex', 'inh', 'opc', 'oli']
1179	VARS2	incomplete-splice_match	0.125	0.625	0.0625	0	0	0.1875	0	0	0.166667	0.333333	0.416667	0	0	0.0833333	0	0	['ast', 'ex', 'inh', 'oli']	['ast', 'ex', 'inh', 'oli']
1187	PPP1R10	incomplete-splice_match	0.111111	0.259259	0.037037	0.0555556	0.037037	0.5	0	0	0.14	0.3	0.14	0.02	0.08	0.32	0	0	['ast', 'ex', 'mic', 'oli']	['ast', 'ex', 'inh', 'opc', 'oli']
1195	FLOT1	incomplete-splice_match	0	1	0	0	0	0	0	0	0.0784314	0.392157	0.254902	0.0196078	0	0.235294	0	0.0196078	['ex']	['ast', 'ex', 'inh', 'oli']
1200	FLOT1	incomplete-splice_match	0.0357143	0.392857	0.0714286	0.107143	0.0357143	0.357143	0	0	0.0833333	0.458333	0.0416667	0.0833333	0.0416667	0.291667	0	0	['ex', 'inh', 'mic', 'oli']	['ast', 'ex', 'mic', 'oli']
1203	IER3	full-splice_match	0	0.423077	0.0384615	0.307692	0.0769231	0.115385	0	0.0384615	0.0384615	0.346154	0.153846	0.346154	0	0.0384615	0	0.0769231	['ex', 'mic', 'opc', 'oli']	['ex', 'end', 'inh', 'mic']
1210	AIF1	full-splice_match	0	0.0769231	0	0.846154	0	0	0	0.0769231	0.0238095	0	0	0.833333	0	0.0238095	0	0.119048	['ex', 'end', 'mic']	['end', 'mic']
1224	DDX39B	full-splice_match	0.0769231	0	0.0769231	0.153846	0.0769231	0.615385	0	0	0.0740741	0.0740741	0.0740741	0.111111	0.185185	0.481481	0	0	['ast', 'inh', 'mic', 'opc', 'oli']	['ast', 'ex', 'inh', 'mic', 'opc', 'oli']
1229	DDX39B	incomplete-splice_match	0.4	0	0	0.2	0	0.4	0	0	0	0.6	0	0.2	0	0.2	0	0	['ast', 'mic', 'oli']	['ex', 'mic', 'oli']
1232	DDX39B	incomplete-splice_match	0.163934	0.459016	0.180328	0.0655738	0.0163934	0.114754	0	0	0.0357143	0.535714	0.142857	0	0.0357143	0.25	0	0	['ast', 'ex', 'inh', 'mic', 'oli']	['ex', 'inh', 'oli']
1235	ATP6V1G2	full-splice_match	0.00775194	0.635659	0.24031	0.00775194	0.0155039	0.0930233	0	0	0	0.513889	0.222222	0	0.0277778	0.236111	0	0	['ex', 'inh', 'oli']	['ex', 'inh', 'oli']
1240	C6orf47	full-splice_match	0.117647	0.176471	0.0588235	0	0	0.647059	0	0	0.0714286	0.0714286	0.0714286	0	0	0.785714	0	0	['ast', 'ex', 'inh', 'oli']	['ast', 'ex', 'inh', 'oli']
1243	CSNK2B	full-splice_match	0.0487805	0.406504	0.105691	0.00813008	0.0243902	0.390244	0	0.0162602	0.0136986	0.260274	0.109589	0.0273973	0.0136986	0.575342	0	0	['ex', 'inh', 'oli']	['ex', 'inh', 'oli']
1248	DDAH2	full-splice_match	0.214286	0.142857	0	0	0.285714	0.285714	0	0.0714286	0.25	0.0625	0	0.25	0.1875	0.25	0	0	['ast', 'ex', 'end', 'opc', 'oli']	['ast', 'ex', 'mic', 'opc', 'oli']
1249	CLIC1	full-splice_match	0	0	0	0.5	0	0	0	0.5	0	0	0	1	0	0	0	0	['end', 'mic']	['mic']
1251	LSM2	full-splice_match	0.08	0.106667	0	0.0133333	0.0133333	0.786667	0	0	0.0240964	0.0722892	0.060241	0	0.060241	0.783133	0	0	['ast', 'ex', 'oli']	['ex', 'inh', 'opc', 'oli']
1254	HSPA1A	full-splice_match	0.152	0.188	0.068	0.042	0.022	0.51	0	0.018	0.105793	0.123426	0.0251889	0.153652	0.0327456	0.556675	0	0.00251889	['ast', 'ex', 'inh', 'oli']	['ast', 'ex', 'mic', 'oli']
1255	HSPA1B	full-splice_match	0.160142	0.0640569	0.0284698	0.0925267	0.0177936	0.637011	0	0	0.180723	0.156627	0.0361446	0.26506	0	0.361446	0	0	['ast', 'ex', 'mic', 'oli']	['ast', 'ex', 'mic', 'oli']
1257	SNHG32	full-splice_match	0	0.107143	0.142857	0	0	0.75	0	0	0.142857	0.142857	0.142857	0	0	0.571429	0	0	['ex', 'inh', 'oli']	['ast', 'ex', 'inh', 'oli']
1258	SNHG32	full-splice_match	0.0123457	0.160494	0.037037	0	0	0.790123	0	0	0.0340909	0.0909091	0.102273	0.0227273	0.0113636	0.738636	0	0	['ex', 'oli']	['ex', 'inh', 'oli']
1261	SNHG32	full-splice_match	0.25	0.25	0	0	0	0.5	0	0	0.1	0.3	0.2	0	0.1	0.3	0	0	['ast', 'ex', 'oli']	['ast', 'ex', 'inh', 'opc', 'oli']
1285	NELFE	full-splice_match	0.166667	0	0	0.166667	0	0.666667	0	0	0.0714286	0.0714286	0.142857	0	0.0714286	0.642857	0	0	['ast', 'mic', 'oli']	['ast', 'ex', 'inh', 'opc', 'oli']
1289	NELFE	incomplete-splice_match	0.1	0.15	0	0	0.1	0.65	0	0	0	0.125	0.0416667	0	0	0.833333	0	0	['ast', 'ex', 'opc', 'oli']	['ex', 'oli']
1306	HLA-DRB1	full-splice_match	0.0483871	0	0.0483871	0.887097	0	0.016129	0	0	0.0693069	0	0	0.871287	0.00990099	0.029703	0	0.019802	['mic']	['ast', 'mic']
1309	PSMB9	full-splice_match	0	0	0	0	0	1	0	0	0.0833333	0	0	0	0	0.833333	0	0.0833333	['oli']	['ast', 'end', 'oli']
1312	BRD2	full-splice_match	0.0333333	0.0833333	0.0666667	0	0.05	0.766667	0	0	0.0888889	0.488889	0.2	0	0.0444444	0.177778	0	0	['ex', 'inh', 'opc', 'oli']	['ast', 'ex', 'inh', 'oli']
1331	RING1	incomplete-splice_match	0	0.333333	0	0	0	0.666667	0	0	0	0.428571	0	0.142857	0.142857	0.285714	0	0	['ex', 'oli']	['ex', 'mic', 'opc', 'oli']
1334	RING1	incomplete-splice_match	0.025	0.4	0.15	0	0.05	0.375	0	0	0.230769	0.384615	0.184615	0	0.0153846	0.184615	0	0	['ex', 'inh', 'opc', 'oli']	['ast', 'ex', 'inh', 'oli']
1336	RPS18	full-splice_match	0.0365093	0.181656	0.0650045	0.0498664	0.0329475	0.62333	0.000890472	0.00979519	0.0409134	0.207422	0.096099	0.0637488	0.0294957	0.557564	0	0.00475737	['ex', 'inh', 'oli']	['ex', 'inh', 'mic', 'oli']
1337	RPS18	incomplete-splice_match	0.0869565	0.130435	0.0434783	0	0.0434783	0.695652	0	0	0	0.357143	0.214286	0	0	0.357143	0.0714286	0	['ast', 'ex', 'oli']	['ex', 'inh', 'oli', 'per']
1339	RPS18	incomplete-splice_match	0.103448	0.241379	0.0689655	0.103448	0.0689655	0.37931	0	0.0344828	0.0416667	0.0416667	0.0833333	0.166667	0	0.666667	0	0	['ast', 'ex', 'inh', 'mic', 'opc', 'oli']	['inh', 'mic', 'oli']
1343	WDR46	incomplete-splice_match	0	0.785714	0.142857	0	0	0.0714286	0	0	0.0714286	0.714286	0.142857	0	0	0.0714286	0	0	['ex', 'inh', 'oli']	['ast', 'ex', 'inh', 'oli']
1344	PFDN6	incomplete-splice_match	0	0.25	0	0	0	0.75	0	0	0	0.2	0	0	0	0.8	0	0	['ex', 'oli']	['ex', 'oli']
1349	PFDN6	full-splice_match	0.0333333	0.133333	0.1	0.0166667	0.0166667	0.7	0	0	0.0227273	0.0454545	0.181818	0.0227273	0.0909091	0.613636	0	0.0227273	['ex', 'inh', 'oli']	['inh', 'opc', 'oli']
1350	PFDN6	full-splice_match	0.0833333	0.25	0.0833333	0.166667	0	0.333333	0	0.0833333	0	0.5	0	0	0	0.5	0	0	['ast', 'ex', 'end', 'inh', 'mic', 'oli']	['ex', 'oli']
1351	PFDN6	full-splice_match	0.0588235	0	0.0588235	0	0	0.823529	0	0.0588235	0	0.047619	0.333333	0.047619	0	0.571429	0	0	['ast', 'end', 'inh', 'oli']	['inh', 'oli']
1352	PFDN6	novel_not_in_catalog	0	0	0	0	0	0.5	0	0.5	0	0.166667	0.166667	0	0.0555556	0.611111	0	0	['end', 'oli']	['ex', 'inh', 'opc', 'oli']
1354	PFDN6	incomplete-splice_match	0	0.714286	0.142857	0.142857	0	0	0	0	0.125	0.5	0	0	0	0.375	0	0	['ex', 'inh', 'mic']	['ast', 'ex', 'oli']
1368	MOG	full-splice_match	0	0	0	0	0	1	0	0	0	0	0	0	0	1	0	0	['oli']	['oli']
1369	MOG	novel_not_in_catalog	0	0	0	0	0	1	0	0	0	0	0	0	0	1	0	0	['oli']	['oli']
1382	POLR1H	full-splice_match	0	0.25	0.25	0	0	0.5	0	0	0.285714	0	0.142857	0	0	0.571429	0	0	['ex', 'inh', 'oli']	['ast', 'inh', 'oli']
1383	POLR1H	full-splice_match	0.5	0	0.25	0	0.125	0.125	0	0	0	0.25	0	0	0.125	0.625	0	0	['ast', 'inh', 'opc', 'oli']	['ex', 'opc', 'oli']
1393	RPP21	full-splice_match	0.078125	0.25	0.0625	0.015625	0.015625	0.5625	0	0.015625	0.0144928	0.0434783	0.217391	0	0.0724638	0.652174	0	0	['ast', 'ex', 'inh', 'oli']	['inh', 'opc', 'oli']
1399	RPP21	incomplete-splice_match	0	0.5	0.5	0	0	0	0	0	0.0769231	0.230769	0.230769	0	0	0.461538	0	0	['ex', 'inh']	['ast', 'ex', 'inh', 'oli']
1402	RPP21	full-splice_match	0	0.4	0.1	0.05	0	0.45	0	0	0	0	0.125	0.25	0	0.625	0	0	['ex', 'inh', 'mic', 'oli']	['inh', 'mic', 'oli']
1405	RPP21	full-splice_match	0	0.423077	0.153846	0	0	0.423077	0	0	0	0.285714	0.142857	0	0.142857	0.428571	0	0	['ex', 'inh', 'oli']	['ex', 'inh', 'opc', 'oli']
1414	ABCF1	incomplete-splice_match	0	0.666667	0	0	0	0.333333	0	0	0	0.222222	0.111111	0	0	0.666667	0	0	['ex', 'oli']	['ex', 'inh', 'oli']
1417	ABCF1	incomplete-splice_match	0.0555556	0.444444	0.0555556	0	0	0.444444	0	0	0	0.1875	0.1875	0.0625	0.125	0.4375	0	0	['ast', 'ex', 'inh', 'oli']	['ex', 'inh', 'mic', 'opc', 'oli']
1419	MRPS18B	full-splice_match	0.0217391	0.0217391	0.0434783	0	0.0217391	0.891304	0	0	0.0344828	0.0517241	0.0344828	0.0689655	0	0.793103	0	0.0172414	['oli']	['ex', 'mic', 'oli']
1424	C6orf136	full-splice_match	0.047619	0.428571	0	0	0	0.52381	0	0	0.0810811	0.486486	0.297297	0	0	0.135135	0	0	['ex', 'oli']	['ast', 'ex', 'inh', 'oli']
1431	TUBB	full-splice_match	0.0434783	0.0434783	0.147826	0.0608696	0.0608696	0.634783	0.00869565	0	0	0.0588235	0	0.294118	0.0588235	0.588235	0	0	['inh', 'mic', 'opc', 'oli']	['ex', 'mic', 'opc', 'oli']
1432	novelGene_IER3_AS	antisense	0	1	0	0	0	0	0	0	0	0	1	0	0	0	0	0	['ex']	['inh']
1437	NFKBIL1	full-splice_match	0	0.153846	0	0	0.0769231	0.769231	0	0	0.2	0.2	0.12	0	0.08	0.4	0	0	['ex', 'opc', 'oli']	['ast', 'ex', 'inh', 'opc', 'oli']
1441	AIF1	full-splice_match	0	0	0	1	0	0	0	0	0.025	0	0	0.875	0.025	0	0	0.075	['mic']	['end', 'mic']
1451	CSNK2B	full-splice_match	0.0444444	0.288889	0.155556	0.0111111	0.0777778	0.411111	0	0.0111111	0.0227273	0.318182	0.102273	0.0227273	0.0227273	0.511364	0	0	['ex', 'inh', 'opc', 'oli']	['ex', 'inh', 'oli']
1457	PSMB9	full-splice_match	0	0	0	0	0.25	0.75	0	0	0	0	0	0.0588235	0.0588235	0.882353	0	0	['opc', 'oli']	['mic', 'opc', 'oli']
1460	BRD2	incomplete-splice_match	0.05	0.7	0.1	0	0	0.1	0.05	0	0	0.6	0.0666667	0	0.0666667	0.266667	0	0	['ast', 'ex', 'inh', 'oli', 'per']	['ex', 'inh', 'opc', 'oli']
1477	SYNGAP1	incomplete-splice_match	0.181818	0.454545	0.363636	0	0	0	0	0	0.0909091	0.454545	0.272727	0	0.181818	0	0	0	['ast', 'ex', 'inh']	['ast', 'ex', 'inh', 'opc']
1490	STK19B	incomplete-splice_match	0.444444	0.333333	0.111111	0	0	0.111111	0	0	0	0.8	0.2	0	0	0	0	0	['ast', 'ex', 'inh', 'oli']	['ex', 'inh']
1507	ATP6V1G2	full-splice_match	0.00819672	0.729508	0.155738	0	0.0163934	0.0819672	0	0.00819672	0	0.595238	0.269841	0.00793651	0	0.126984	0	0	['ex', 'inh', 'oli']	['ex', 'inh', 'oli']
1511	C6orf47	full-splice_match	0	0.166667	0.125	0.0416667	0	0.666667	0	0	0.0434783	0.173913	0.130435	0.0434783	0.0869565	0.521739	0	0	['ex', 'inh', 'oli']	['ex', 'inh', 'opc', 'oli']
1514	ABHD16A	incomplete-splice_match	0.0952381	0.142857	0.142857	0.047619	0	0.571429	0	0	0.0689655	0.551724	0.0689655	0	0	0.310345	0	0	['ast', 'ex', 'inh', 'oli']	['ast', 'ex', 'inh', 'oli']
1516	DDAH2	full-splice_match	0.333333	0	0	0.333333	0	0.333333	0	0	0.142857	0	0.142857	0	0.142857	0.571429	0	0	['ast', 'mic', 'oli']	['ast', 'inh', 'opc', 'oli']
1526	PPP1R10	incomplete-splice_match	0.0925926	0.222222	0.0555556	0.037037	0.0555556	0.537037	0	0	0.0714286	0.339286	0.160714	0.0357143	0	0.392857	0	0	['ast', 'ex', 'inh', 'opc', 'oli']	['ast', 'ex', 'inh', 'oli']
1532	FLOT1	incomplete-splice_match	0	0.666667	0.333333	0	0	0	0	0	0	0.375	0.25	0	0	0.25	0.125	0	['ex', 'inh']	['ex', 'inh', 'oli', 'per']
1536	FLOT1	full-splice_match	0.0103093	0.639175	0.123711	0.0206186	0.0103093	0.164948	0	0.0309278	0.0338983	0.440678	0.152542	0.0508475	0.0169492	0.305085	0	0	['ex', 'inh', 'oli']	['ex', 'inh', 'mic', 'oli']
1538	FLOT1	incomplete-splice_match	0.0740741	0.481481	0.148148	0.037037	0.037037	0.222222	0	0	0	1	0	0	0	0	0	0	['ast', 'ex', 'inh', 'oli']	['ex']
1544	IER3	full-splice_match	0	0	0.333333	0.333333	0	0.333333	0	0	0	0.272727	0.0909091	0.636364	0	0	0	0	['inh', 'mic', 'oli']	['ex', 'inh', 'mic']
1545	IER3	full-splice_match	0.0666667	0.333333	0.133333	0.4	0	0	0	0.0666667	0	0.285714	0	0.714286	0	0	0	0	['ast', 'ex', 'end', 'inh', 'mic']	['ex', 'mic']
1550	NELFE	full-splice_match	0.0769231	0	0	0.0769231	0	0.846154	0	0	0	0.125	0	0	0.0833333	0.791667	0	0	['ast', 'mic', 'oli']	['ex', 'opc', 'oli']
1553	NELFE	incomplete-splice_match	0.0967742	0.0645161	0.0645161	0	0.0322581	0.709677	0	0.0322581	0.1	0.1	0	0.025	0.05	0.725	0	0	['ast', 'ex', 'inh', 'oli']	['ast', 'ex', 'opc', 'oli']
1555	TNXA	incomplete-splice_match	0.454545	0	0.272727	0	0	0	0.181818	0.0909091	0	0.875	0	0	0	0	0.125	0	['ast', 'end', 'inh', 'per']	['ex', 'per']
1562	PSMB8	full-splice_match	0	0	0	0	0	0.857143	0	0.142857	0	0	0.0769231	0.0769231	0.230769	0.538462	0	0.0769231	['end', 'oli']	['end', 'inh', 'mic', 'opc', 'oli']
1567	HLA-DPA1	incomplete-splice_match	0	0.186047	0.0465116	0.744186	0	0.0232558	0	0	0	0	0	0.8125	0	0.1875	0	0	['ex', 'mic']	['mic', 'oli']
1571	CUTA	full-splice_match	0.0277778	0.00925926	0.00925926	0	0.0277778	0.925926	0	0	0.0446429	0.165179	0.107143	0.00892857	0.03125	0.638393	0	0.00446429	['oli']	['ex', 'inh', 'oli']
1572	CUTA	novel_in_catalog	0	0	0	0	0	1	0	0	0	0.2	0	0	0.1	0.7	0	0	['oli']	['ex', 'opc', 'oli']
1574	CUTA	novel_in_catalog	0	0	0	0	0	1	0	0	0	0.333333	0.666667	0	0	0	0	0	['oli']	['ex', 'inh']
1578	CUTA	full-splice_match	0.0555556	0.146465	0.0909091	0.020202	0.030303	0.651515	0	0.00505051	0.0603448	0.146552	0.0948276	0.012931	0.0517241	0.633621	0	0	['ast', 'ex', 'inh', 'oli']	['ast', 'ex', 'inh', 'opc', 'oli']
1586	CUTA	full-splice_match	0.0113636	0.0984848	0.0719697	0.0151515	0.0227273	0.780303	0	0	0.0262295	0.0918033	0.108197	0.00983607	0.0360656	0.727869	0	0	['ex', 'inh', 'oli']	['ex', 'inh', 'oli']
1592	CUTA	full-splice_match	0.0397112	0.274368	0.0577617	0.0216606	0.0288809	0.570397	0.00361011	0.00361011	0.0296296	0.251852	0.177778	0.0222222	0.0814815	0.437037	0	0	['ex', 'inh', 'oli']	['ex', 'inh', 'opc', 'oli']
1597	CUTA	full-splice_match	0	0.6	0	0	0	0.4	0	0	0	0.5	0	0	0	0.5	0	0	['ex', 'oli']	['ex', 'oli']
1599	YTHDC1	incomplete-splice_match	0.0816327	0.591837	0.22449	0.0408163	0.0204082	0.0408163	0	0	0.0892857	0.214286	0.196429	0.107143	0.0178571	0.375	0	0	['ast', 'ex', 'inh']	['ast', 'ex', 'inh', 'mic', 'oli']
1604	YTHDC1	incomplete-splice_match	0.153846	0.0769231	0	0.0769231	0	0.615385	0	0.0769231	0.133333	0.133333	0.0666667	0	0	0.666667	0	0	['ast', 'ex', 'end', 'mic', 'oli']	['ast', 'ex', 'inh', 'oli']
1605	YTHDC1	incomplete-splice_match	0.0461538	0.246154	0.0769231	0.0307692	0	0.569231	0	0.0307692	0.113208	0.264151	0.150943	0.0566038	0.0377358	0.358491	0	0.0188679	['ex', 'inh', 'oli']	['ast', 'ex', 'inh', 'mic', 'oli']
1606	YTHDC1	incomplete-splice_match	0.181818	0.232323	0.0909091	0	0.030303	0.464646	0	0	0.0416667	0.283333	0.158333	0.0333333	0.0333333	0.441667	0	0.00833333	['ast', 'ex', 'inh', 'oli']	['ex', 'inh', 'oli']
1609	ARL17B	incomplete-splice_match	0	0.363636	0.181818	0	0	0.454545	0	0	0.181818	0.0909091	0	0.181818	0.181818	0.363636	0	0	['ex', 'inh', 'oli']	['ast', 'ex', 'mic', 'opc', 'oli']
1610	ARL17B	incomplete-splice_match	0	0.285714	0.214286	0	0.0714286	0.428571	0	0	0	0.230769	0.0769231	0.153846	0.0769231	0.461538	0	0	['ex', 'inh', 'opc', 'oli']	['ex', 'inh', 'mic', 'opc', 'oli']
1611	ARL17B	incomplete-splice_match	0.25	0	0.25	0	0	0.5	0	0	0	0.428571	0.428571	0	0.142857	0	0	0	['ast', 'inh', 'oli']	['ex', 'inh', 'opc']
1612	ARL17B	full-splice_match	0	0	0	0.333333	0	0.666667	0	0	0	0.181818	0.0909091	0	0	0.727273	0	0	['mic', 'oli']	['ex', 'inh', 'oli']
1618	KANSL1	full-splice_match	0.1	0.133333	0.0666667	0.0666667	0.05	0.583333	0	0	0.153846	0.307692	0.333333	0	0.025641	0.179487	0	0	['ast', 'ex', 'inh', 'mic', 'opc', 'oli']	['ast', 'ex', 'inh', 'oli']
1620	MAPT-AS1	full-splice_match	0.142857	0.428571	0	0	0	0.428571	0	0	0.0909091	0.454545	0.0909091	0	0	0.363636	0	0	['ast', 'ex', 'oli']	['ast', 'ex', 'inh', 'oli']
1622	ENSG00000281487	novel_not_in_catalog	0.0277778	0.166667	0.0277778	0.0277778	0.0277778	0.694444	0	0.0277778	0.0666667	0.366667	0.166667	0	0.1	0.266667	0.0333333	0	['ex', 'oli']	['ast', 'ex', 'inh', 'opc', 'oli']
1623	ENSG00000281487	novel_not_in_catalog	0.0645161	0	0	0.0322581	0.0645161	0.83871	0	0	0.166667	0	0.0833333	0.166667	0.0833333	0.5	0	0	['ast', 'opc', 'oli']	['ast', 'inh', 'mic', 'opc', 'oli']
1624	ENSG00000281487	full-splice_match	0.5	0	0	0	0	0.5	0	0	0.162791	0.372093	0.162791	0	0.0232558	0.27907	0	0	['ast', 'oli']	['ast', 'ex', 'inh', 'oli']
1627	ENSG00000275574	full-splice_match	0.5	0.5	0	0	0	0	0	0	0	0.571429	0	0	0	0.428571	0	0	['ast', 'ex']	['ex', 'oli']
1628	NSF	incomplete-splice_match	0.0909091	0.545455	0.181818	0	0	0.181818	0	0	0.047619	0.285714	0.428571	0	0	0.238095	0	0	['ast', 'ex', 'inh', 'oli']	['ex', 'inh', 'oli']
1629	NSF	incomplete-splice_match	0	0.428571	0.285714	0.142857	0	0.142857	0	0	0	0.6	0	0	0	0.4	0	0	['ex', 'inh', 'mic', 'oli']	['ex', 'oli']
1630	NSF	incomplete-splice_match									0	0.6	0.4	0	0	0	0	0	[]	['ex', 'inh']
1633	NSF	incomplete-splice_match	0	0.6	0.4	0	0	0	0	0	0	0.555556	0.111111	0	0.111111	0.222222	0	0	['ex', 'inh']	['ex', 'inh', 'opc', 'oli']
1635	NSF	incomplete-splice_match	0	0.5	0.125	0.25	0	0.125	0	0	0.0769231	0.307692	0.153846	0.0769231	0	0.384615	0	0	['ex', 'inh', 'mic', 'oli']	['ast', 'ex', 'inh', 'mic', 'oli']
1646	NSFP1	incomplete-splice_match	0	0.642857	0.214286	0	0	0.142857	0	0	0.05	0.45	0.3	0	0	0.2	0	0	['ex', 'inh', 'oli']	['ast', 'ex', 'inh', 'oli']
1648	NSFP1	incomplete-splice_match	0	0.461538	0.307692	0	0	0.230769	0	0	0	0.3	0.5	0	0	0.2	0	0	['ex', 'inh', 'oli']	['ex', 'inh', 'oli']
1649	NSFP1	incomplete-splice_match	0	0.555556	0.111111	0	0	0.333333	0	0	0	0.6	0	0	0	0.4	0	0	['ex', 'inh', 'oli']	['ex', 'oli']
1650	LRRC37A	incomplete-splice_match	0	0.111111	0.111111	0	0.111111	0.666667	0	0	0	0.2	0.2	0.1	0	0.5	0	0	['ex', 'inh', 'opc', 'oli']	['ex', 'inh', 'mic', 'oli']
1652	PLEKHM1	incomplete-splice_match	0.333333	0	0	0	0.111111	0.555556	0	0	0.0555556	0.277778	0.111111	0.0555556	0	0.5	0	0	['ast', 'opc', 'oli']	['ast', 'ex', 'inh', 'mic', 'oli']
1661	KANSL1-AS1	full-splice_match	0.125	0.375	0	0	0	0.5	0	0	0.153846	0.115385	0.0769231	0	0	0.615385	0	0.0384615	['ast', 'ex', 'oli']	['ast', 'ex', 'inh', 'oli']
1665	Metazoa_SRP	full-splice_match	0.0294118	0.323529	0.205882	0.0294118	0.0294118	0.382353	0	0	0	0.517241	0.172414	0	0.103448	0.206897	0	0	['ex', 'inh', 'oli']	['ex', 'inh', 'opc', 'oli']
1671	MRPS36	incomplete-splice_match	0.111111	0.111111	0	0.111111	0	0.666667	0	0	0.25	0.25	0	0	0	0.5	0	0	['ast', 'ex', 'mic', 'oli']	['ast', 'ex', 'oli']
1675	CDK7	full-splice_match	0	0.363636	0.0909091	0	0.0909091	0.454545	0	0	0.125	0.5	0.125	0	0	0.25	0	0	['ex', 'inh', 'opc', 'oli']	['ast', 'ex', 'inh', 'oli']
1679	RAD17	incomplete-splice_match	0	0.333333	0.166667	0	0	0.5	0	0	0.2	0.1	0.1	0	0	0.6	0	0	['ex', 'inh', 'oli']	['ast', 'ex', 'inh', 'oli']
1689	RAD17	incomplete-splice_match	0.111111	0.222222	0	0	0	0.555556	0	0.111111	0	0.2	0.4	0	0	0.4	0	0	['ast', 'ex', 'end', 'oli']	['ex', 'inh', 'oli']
1690	RAD17	incomplete-splice_match	0	0	0	0	0	1	0	0	0	0.285714	0.142857	0	0.142857	0.428571	0	0	['oli']	['ex', 'inh', 'opc', 'oli']
1706	GTF2H2	novel_in_catalog	0.333333	0.5	0	0	0.166667	0	0	0	0	0.666667	0	0.111111	0	0.222222	0	0	['ast', 'ex', 'opc']	['ex', 'mic', 'oli']
1707	GTF2H2	incomplete-splice_match	0.2	0.3	0.1	0	0	0.4	0	0	0.125	0.5	0	0.125	0	0.25	0	0	['ast', 'ex', 'inh', 'oli']	['ast', 'ex', 'mic', 'oli']
1712	ENSG00000290506	incomplete-splice_match	0	0	0	0	0	1	0	0	0	0.0909091	0	0	0	0.909091	0	0	['oli']	['ex', 'oli']
1718	GTF2H2	incomplete-splice_match	0.142857	0.214286	0.357143	0	0	0.285714	0	0	0	0	0	0	0	1	0	0	['ast', 'ex', 'inh', 'oli']	['oli']
1733	SMN2	full-splice_match	0.128205	0.538462	0.102564	0	0	0.230769	0	0	0.142857	0.285714	0	0.0714286	0	0.5	0	0	['ast', 'ex', 'inh', 'oli']	['ast', 'ex', 'mic', 'oli']
1737	SMN2	incomplete-splice_match	0	0.5	0.333333	0	0	0.166667	0	0	0.333333	0.166667	0.333333	0	0	0.166667	0	0	['ex', 'inh', 'oli']	['ast', 'ex', 'inh', 'oli']
1742	SMN2	incomplete-splice_match	0	0.333333	0.166667	0	0	0.5	0	0	0	0.222222	0.444444	0	0	0.333333	0	0	['ex', 'inh', 'oli']	['ex', 'inh', 'oli']
1743	SMN2	incomplete-splice_match	0.117647	0.588235	0.0392157	0.0196078	0.0392157	0.196078	0	0	0.0952381	0.52381	0.0952381	0	0.047619	0.238095	0	0	['ast', 'ex', 'oli']	['ast', 'ex', 'inh', 'oli']
1748	SERF1B	full-splice_match	0.0338983	0.237288	0.135593	0	0.0677966	0.508475	0	0.0169492	0.106796	0.194175	0.116505	0	0.0776699	0.504854	0	0	['ex', 'inh', 'opc', 'oli']	['ast', 'ex', 'inh', 'opc', 'oli']
1749	SERF1B	full-splice_match	0.153846	0.307692	0.153846	0	0.0769231	0.307692	0	0	0	0.5	0.214286	0	0.142857	0.142857	0	0	['ast', 'ex', 'inh', 'opc', 'oli']	['ex', 'inh', 'opc', 'oli']
1751	SERF1B	incomplete-splice_match	0	0.535714	0.142857	0.0357143	0	0.25	0	0.0357143	0.0243902	0.268293	0.170732	0	0.0487805	0.487805	0	0	['ex', 'inh', 'oli']	['ex', 'inh', 'oli']
1753	SERF1B	incomplete-splice_match	0.0588235	0.705882	0.117647	0	0	0.117647	0	0	0	0.647059	0.0588235	0.0588235	0.117647	0.117647	0	0	['ast', 'ex', 'inh', 'oli']	['ex', 'inh', 'mic', 'opc', 'oli']
1754	ENSG00000275311	full-splice_match	0.166667	0.0466667	0.0333333	0	0.00666667	0.746667	0	0	0.09375	0.135417	0.125	0.0104167	0.03125	0.59375	0	0.0104167	['ast', 'oli']	['ast', 'ex', 'inh', 'oli']
1755	ENSG00000277036	full-splice_match	0	0.0185185	0.0185185	0	0.037037	0.925926	0	0	0.0232558	0.0232558	0.0232558	0	0.0232558	0.906977	0	0	['oli']	['oli']
1756	ENSG00000273847	full-splice_match	0.062069	0.0137931	0.0344828	0.0137931	0.0206897	0.855172	0	0	0.0481928	0.0120482	0.0361446	0	0.0361446	0.86747	0	0	['ast', 'oli']	['oli']
1758	CCDC125	incomplete-splice_match	0	0	0.25	0	0	0.75	0	0	0.142857	0	0.285714	0.142857	0	0.428571	0	0	['inh', 'oli']	['ast', 'inh', 'mic', 'oli']
1760	ENSG00000275825	full-splice_match	0.0714286	0.0357143	0.0714286	0	0.0357143	0.785714	0	0	0.0666667	0.1	0.0333333	0	0	0.8	0	0	['ast', 'inh', 'oli']	['ast', 'ex', 'oli']
1761	ENSG00000275536	full-splice_match	0.0555556	0.0277778	0	0.0277778	0	0.888889	0	0	0.0689655	0.103448	0.0344828	0	0.0344828	0.758621	0	0	['ast', 'oli']	['ast', 'ex', 'oli']
1765	AK6	full-splice_match	0.0697674	0.170543	0.0620155	0.0155039	0.0387597	0.635659	0	0.00775194	0.0630631	0.225225	0.108108	0.018018	0.036036	0.540541	0	0.00900901	['ast', 'ex', 'inh', 'oli']	['ast', 'ex', 'inh', 'oli']
1771	AK6	full-splice_match	0	0.166667	0.166667	0	0	0.666667	0	0	0	0.333333	0.222222	0.111111	0.222222	0.111111	0	0	['ex', 'inh', 'oli']	['ex', 'inh', 'mic', 'opc', 'oli']
1774	GTF2H2C_2	incomplete-splice_match	0.0555556	0.222222	0.166667	0.111111	0	0.444444	0	0	0.2	0.2	0.4	0	0	0.2	0	0	['ast', 'ex', 'inh', 'mic', 'oli']	['ast', 'ex', 'inh', 'oli']
1776	GTF2H2C_2	incomplete-splice_match	0.4	0.4	0	0	0	0.2	0	0	0.0833333	0.416667	0.0833333	0	0	0.416667	0	0	['ast', 'ex', 'oli']	['ast', 'ex', 'inh', 'oli']
1780	GTF2H2C_2	full-splice_match	0	0	0.2	0	0	0.8	0	0	0.0625	0.0625	0.25	0.0625	0.25	0.3125	0	0	['inh', 'oli']	['ast', 'ex', 'inh', 'mic', 'opc', 'oli']
1789	TAF9	full-splice_match	0.0362319	0.514493	0.130435	0.0217391	0.0217391	0.268116	0	0.00724638	0.0434783	0.297101	0.181159	0.00724638	0.0362319	0.434783	0	0	['ex', 'inh', 'oli']	['ex', 'inh', 'oli']
1796	TAF9	incomplete-splice_match	0	0.333333	0.111111	0	0.111111	0.444444	0	0	0	0	0	0.25	0	0.75	0	0	['ex', 'inh', 'opc', 'oli']	['mic', 'oli']
1799	INTS3	incomplete-splice_match	0.133333	0.533333	0.0666667	0.0666667	0	0.2	0	0	0	0.6	0	0.1	0.1	0.2	0	0	['ast', 'ex', 'inh', 'mic', 'oli']	['ex', 'mic', 'opc', 'oli']
1803	SLC27A3	novel_in_catalog	0.0333333	0.833333	0.133333	0	0	0	0	0	0.205128	0.435897	0.25641	0.025641	0	0.0769231	0	0	['ex', 'inh']	['ast', 'ex', 'inh', 'oli']
1810	ENSG00000261905	incomplete-splice_match	0.266667	0	0	0	0.0666667	0.666667	0	0	0.121212	0.212121	0.181818	0.030303	0	0.454545	0	0	['ast', 'opc', 'oli']	['ast', 'ex', 'inh', 'oli']
1818	ENTREP3	incomplete-splice_match	0.245614	0.0701754	0.157895	0	0.0350877	0.491228	0	0	0.0232558	0.395349	0.162791	0.0465116	0.0697674	0.302326	0	0	['ast', 'ex', 'inh', 'oli']	['ex', 'inh', 'opc', 'oli']
1830	SCAMP3	full-splice_match	0.0144928	0	0.0434783	0.0144928	0.0144928	0.913043	0	0	0.0662252	0.291391	0.211921	0.0198675	0.0264901	0.384106	0	0	['oli']	['ast', 'ex', 'inh', 'oli']
1834	CLK2	incomplete-splice_match	0.129032	0.370968	0.177419	0.016129	0.0322581	0.241935	0.016129	0.016129	0.28	0.4	0.16	0.04	0.08	0.04	0	0	['ast', 'ex', 'inh', 'oli']	['ast', 'ex', 'inh', 'opc']
1839	HCN3	incomplete-splice_match	0.0555556	0.555556	0.333333	0	0.0185185	0.0185185	0	0.0185185	0	0.366667	0.566667	0	0.0333333	0.0333333	0	0	['ast', 'ex', 'inh']	['ex', 'inh']
1842	PTPRC	full-splice_match	0	0	0	0.933333	0	0.0666667	0	0	0.0188679	0	0	0.924528	0	0.0188679	0	0.0377358	['mic', 'oli']	['mic']
1844	PTPRC	incomplete-splice_match	0	0	0.0625	0.9375	0	0	0	0	0	0	0	0.96	0	0	0	0.04	['inh', 'mic']	['mic']
1845	CRIM1-DT	novel_not_in_catalog	0.111111	0.638889	0.111111	0	0.0555556	0.0555556	0	0.0277778	0.103448	0.551724	0.224138	0.0344828	0.0172414	0.0689655	0	0	['ast', 'ex', 'inh', 'opc', 'oli']	['ast', 'ex', 'inh', 'oli']
1846	CRIM1-DT	full-splice_match	0.0930233	0.767442	0.0465116	0	0.0232558	0.0697674	0	0	0.117647	0.617647	0.147059	0.0294118	0	0.0882353	0	0	['ast', 'ex', 'oli']	['ast', 'ex', 'inh', 'oli']
1854	ENSG00000273741	full-splice_match	0	0.166667	0	0	0	0.833333	0	0	0	0.190476	0	0	0	0.809524	0	0	['ex', 'oli']	['ex', 'oli']
1857	DENND11	incomplete-splice_match	0.0833333	0.583333	0	0	0	0.333333	0	0	0	1	0	0	0	0	0	0	['ast', 'ex', 'oli']	['ex']
1859	SSBP1	incomplete-splice_match	0.25	0.25	0.25	0	0	0.25	0	0	0.25	0	0.5	0	0	0.25	0	0	['ast', 'ex', 'inh', 'oli']	['ast', 'inh', 'oli']
1860	SSBP1	full-splice_match	0.125	0.375	0	0.125	0	0.375	0	0	0.5	0	0	0	0.5	0	0	0	['ast', 'ex', 'mic', 'oli']	['ast', 'opc']
1862	SSBP1	full-splice_match	0.111111	0.0740741	0.0555556	0.0555556	0.037037	0.666667	0	0	0.122449	0.22449	0.0816327	0.0612245	0.0816327	0.428571	0	0	['ast', 'ex', 'inh', 'mic', 'oli']	['ast', 'ex', 'inh', 'mic', 'opc', 'oli']
1866	SSBP1	full-splice_match	0	0	0	0	0	1	0	0	0.148148	0	0.185185	0.037037	0.0740741	0.555556	0	0	['oli']	['ast', 'inh', 'opc', 'oli']
1870	SSBP1	full-splice_match	0.0714286	0.0952381	0.047619	0.0238095	0.0714286	0.690476	0	0	0.0365854	0.097561	0.0609756	0.0243902	0.097561	0.682927	0	0	['ast', 'ex', 'opc', 'oli']	['ex', 'inh', 'opc', 'oli']
1871	SSBP1	incomplete-splice_match	0	0	0.166667	0.166667	0.166667	0.5	0	0	0.0769231	0.384615	0.153846	0.0512821	0	0.333333	0	0	['inh', 'mic', 'opc', 'oli']	['ast', 'ex', 'inh', 'mic', 'oli']
1874	APBA1	full-splice_match	0.0357143	0.214286	0.0714286	0	0.107143	0.571429	0	0	0	0.473684	0.0526316	0	0.105263	0.368421	0	0	['ex', 'inh', 'opc', 'oli']	['ex', 'inh', 'opc', 'oli']
1878	ATP23	full-splice_match	0	0.333333	0	0	0	0.666667	0	0	0	0.2	0.4	0	0.2	0.2	0	0	['ex', 'oli']	['ex', 'inh', 'opc', 'oli']
1879	GIHCG	full-splice_match	0.4	0.333333	0.133333	0	0	0.133333	0	0	0.15625	0.46875	0.09375	0.03125	0.0625	0.1875	0	0	['ast', 'ex', 'inh', 'oli']	['ast', 'ex', 'inh', 'opc', 'oli']
1880	GIHCG	full-splice_match	0	0.461538	0.153846	0	0	0.384615	0	0	0.133333	0.4	0.133333	0	0.0666667	0.266667	0	0	['ex', 'inh', 'oli']	['ast', 'ex', 'inh', 'opc', 'oli']
1887	ENSG00000290583	full-splice_match	0.0769231	0.461538	0	0	0	0.461538	0	0	0.166667	0.0833333	0	0.166667	0	0.583333	0	0	['ast', 'ex', 'oli']	['ast', 'ex', 'mic', 'oli']
1893	RPH3AL-AS1	full-splice_match	0	0.666667	0	0	0	0.333333	0	0	0	0	0	0	0	1	0	0	['ex', 'oli']	['oli']
1901	ENSG00000263322	full-splice_match	0.0277778	0.0833333	0.0277778	0	0.222222	0.638889	0	0	0	0.0952381	0.333333	0	0.238095	0.333333	0	0	['ex', 'opc', 'oli']	['ex', 'inh', 'opc', 'oli']
1903	DSEL	full-splice_match	0.0377358	0.0754717	0.0660377	0.00943396	0.0660377	0.745283	0	0	0.00892857	0.0803571	0.0625	0	0.0625	0.785714	0	0	['ex', 'inh', 'opc', 'oli']	['ex', 'inh', 'opc', 'oli']
1905	ZNF66	incomplete-splice_match	0	0.272727	0.363636	0	0	0.363636	0	0	0	0.428571	0	0	0.0714286	0.5	0	0	['ex', 'inh', 'oli']	['ex', 'opc', 'oli']
1908	ZNF85	full-splice_match	0	0.2	0	0	0.2	0.6	0	0	0	0.142857	0.142857	0	0.142857	0.571429	0	0	['ex', 'opc', 'oli']	['ex', 'inh', 'opc', 'oli']
1917	LSM14A	incomplete-splice_match	0	0.4	0	0	0	0.6	0	0	0	0.166667	0.166667	0	0.166667	0.5	0	0	['ex', 'oli']	['ex', 'inh', 'opc', 'oli']
1919	LSM14A	incomplete-splice_match	0	0	0	0	0	1	0	0	0.166667	0.166667	0.333333	0	0	0.333333	0	0	['oli']	['ast', 'ex', 'inh', 'oli']
1923	LSM14A	incomplete-splice_match	0	0.142857	0.285714	0	0	0.571429	0	0	0	0.2	0.133333	0.133333	0	0.533333	0	0	['ex', 'inh', 'oli']	['ex', 'inh', 'mic', 'oli']
1924	LSM14A	incomplete-splice_match	0.0285714	0.2	0	0	0	0.771429	0	0	0.0571429	0.0571429	0.257143	0.0285714	0.0571429	0.542857	0	0	['ex', 'oli']	['ast', 'ex', 'inh', 'opc', 'oli']
1930	GARRE1	full-splice_match	0.00840336	0.0252101	0.0588235	0.0168067	0.00840336	0.882353	0	0	0.0559211	0.207237	0.0789474	0.0328947	0.0197368	0.601974	0	0.00328947	['inh', 'oli']	['ast', 'ex', 'inh', 'oli']
1936	ZNF100	full-splice_match	0.111111	0	0.111111	0.111111	0	0.666667	0	0	0.25	0.25	0	0	0	0.5	0	0	['ast', 'inh', 'mic', 'oli']	['ast', 'ex', 'oli']
1940	ZNF43	full-splice_match	0.162791	0.232558	0.186047	0.0465116	0.0697674	0.27907	0	0.0232558	0.0625	0.3125	0.229167	0.0208333	0.0833333	0.291667	0	0	['ast', 'ex', 'inh', 'opc', 'oli']	['ast', 'ex', 'inh', 'opc', 'oli']
1945	PAXBP1	full-splice_match	0.129032	0.0322581	0	0	0.0322581	0.806452	0	0	0.12766	0.0638298	0.106383	0.0212766	0.212766	0.468085	0	0	['ast', 'oli']	['ast', 'ex', 'inh', 'opc', 'oli']
1948	IFNGR2	full-splice_match	0.0290456	0.510373	0.278008	0.112033	0.0290456	0.0414938	0	0	0.0535714	0.0892857	0.446429	0.0892857	0.0892857	0.232143	0	0	['ex', 'inh', 'mic']	['ast', 'ex', 'inh', 'mic', 'opc', 'oli']
1951	TMEM50B	novel_in_catalog	0.12	0.4	0.08	0.04	0.04	0.32	0	0	0	0.5	0	0	0	0.5	0	0	['ast', 'ex', 'inh', 'oli']	['ex', 'oli']
1953	TMEM50B	full-splice_match	0.0694444	0.208333	0.180556	0.0138889	0.0555556	0.444444	0	0.0277778	0.113402	0.185567	0.226804	0.0206186	0.0721649	0.371134	0	0.0103093	['ast', 'ex', 'inh', 'opc', 'oli']	['ast', 'ex', 'inh', 'opc', 'oli']
1958	TMEM50B	incomplete-splice_match	0	0	0.428571	0	0.142857	0.428571	0	0	0.3	0.2	0.2	0	0	0.3	0	0	['inh', 'opc', 'oli']	['ast', 'ex', 'inh', 'oli']
1959	TMEM50B	incomplete-splice_match	0	0	0.333333	0.166667	0	0.5	0	0	0	0.333333	0.111111	0.111111	0	0.444444	0	0	['inh', 'mic', 'oli']	['ex', 'inh', 'mic', 'oli']
1960	TMEM50B	full-splice_match	0.0588235	0.352941	0.176471	0.0588235	0.0588235	0.294118	0	0	0.0952381	0.380952	0.428571	0	0	0.0952381	0	0	['ast', 'ex', 'inh', 'mic', 'opc', 'oli']	['ast', 'ex', 'inh', 'oli']
1961	TMEM50B	incomplete-splice_match	0	0	0.181818	0	0	0.727273	0	0.0909091	0.157895	0	0.315789	0.0526316	0	0.473684	0	0	['end', 'inh', 'oli']	['ast', 'inh', 'mic', 'oli']
1964	DNAJC28	full-splice_match	0.1	0.4	0	0	0	0.5	0	0	0	0	0	0	0.166667	0.833333	0	0	['ast', 'ex', 'oli']	['opc', 'oli']
1967	GART	incomplete-splice_match	0.111111	0	0.222222	0	0	0.666667	0	0	0.2	0.4	0.2	0	0.2	0	0	0	['ast', 'inh', 'oli']	['ast', 'ex', 'inh', 'opc']
1971	SMDT1	full-splice_match	0.0530973	0.367257	0.119469	0.039823	0.0221239	0.39823	0	0	0.0219298	0.320175	0.162281	0.0219298	0.0438596	0.429825	0	0	['ast', 'ex', 'inh', 'oli']	['ex', 'inh', 'oli']
1976	SMDT1	novel_not_in_catalog	0	0	0	0	0	1	0	0	0	0.166667	0.166667	0	0	0.666667	0	0	['oli']	['ex', 'inh', 'oli']
1977	SMDT1	full-splice_match	0.08	0.24	0.16	0	0.08	0.44	0	0	0	0.36	0.12	0	0.08	0.44	0	0	['ast', 'ex', 'inh', 'opc', 'oli']	['ex', 'inh', 'opc', 'oli']
1978	NDUFA6	full-splice_match	0.162162	0.27027	0.0675676	0.027027	0.0405405	0.418919	0.0135135	0	0.142857	0.214286	0.0833333	0.0595238	0.0357143	0.440476	0.0119048	0.0119048	['ast', 'ex', 'inh', 'oli']	['ast', 'ex', 'inh', 'mic', 'oli']
1981	OLA1P1	full-splice_match	0	0.2	0.2	0	0	0.6	0	0	0	0.75	0	0	0	0.25	0	0	['ex', 'inh', 'oli']	['ex', 'oli']
1983	CYP2D7	incomplete-splice_match	0.4	0	0.2	0	0.2	0.2	0	0	0	0.636364	0	0	0.0909091	0.272727	0	0	['ast', 'inh', 'opc', 'oli']	['ex', 'opc', 'oli']
1988	KIF5C	incomplete-splice_match	0.0471698	0.386792	0.0849057	0	0.0283019	0.45283	0	0	0.0344828	0.241379	0.241379	0	0.0689655	0.413793	0	0	['ex', 'inh', 'oli']	['ex', 'inh', 'opc', 'oli']
1996	WASH8P	incomplete-splice_match	0	0	0.6	0.2	0.2	0	0	0	0	0.25	0.5	0	0	0.25	0	0	['inh', 'mic', 'opc']	['ex', 'inh', 'oli']
1999	WASH8P	incomplete-splice_match	0.0344828	0.431034	0.12069	0.0862069	0.0172414	0.310345	0	0	0.0205479	0.719178	0.19863	0	0.00684932	0.0547945	0	0	['ex', 'inh', 'mic', 'oli']	['ex', 'inh', 'oli']
2001	WASH8P	novel_not_in_catalog	0	0	0	0	0	1	0	0	0	0.6	0.2	0	0	0.2	0	0	['oli']	['ex', 'inh', 'oli']
2005	ENSG00000282676	full-splice_match	0.0192308	0.692308	0.269231	0	0	0.0192308	0	0	0	0.519231	0.461538	0	0	0.0192308	0	0	['ex', 'inh']	['ex', 'inh']
2008	SMIM10L1	full-splice_match	0.0625	0.3125	0	0	0.0625	0.5625	0	0	0.0263158	0.236842	0.131579	0.0263158	0.0526316	0.526316	0	0	['ast', 'ex', 'opc', 'oli']	['ex', 'inh', 'opc', 'oli']
2012	TAS2R14	full-splice_match	0.0526316	0.105263	0.0526316	0	0	0.789474	0	0	0.030303	0.333333	0.0606061	0	0	0.575758	0	0	['ast', 'ex', 'inh', 'oli']	['ex', 'inh', 'oli']
2017	TAS2R15P	full-splice_match	0	0.217391	0.130435	0.0434783	0.0869565	0.521739	0	0	0.0357143	0.392857	0.25	0	0	0.321429	0	0	['ex', 'inh', 'opc', 'oli']	['ex', 'inh', 'oli']
2018	PRR4	incomplete-splice_match	0	0.142857	0.0714286	0	0	0.785714	0	0	0.111111	0.277778	0.166667	0	0.0555556	0.388889	0	0	['ex', 'inh', 'oli']	['ast', 'ex', 'inh', 'opc', 'oli']
2019	PRR4	novel_not_in_catalog	0.1	0	0.2	0	0.1	0.6	0	0	0.107143	0.0714286	0.0714286	0.0357143	0.0357143	0.678571	0	0	['ast', 'inh', 'opc', 'oli']	['ast', 'ex', 'inh', 'oli']
2021	TAS2R20	full-splice_match	0.111111	0	0	0	0.111111	0.777778	0	0	0	0.3	0.3	0	0	0.4	0	0	['ast', 'opc', 'oli']	['ex', 'inh', 'oli']
2029	TAS2R30	full-splice_match	0.0833333	0	0.166667	0	0	0.75	0	0	0.166667	0.333333	0.166667	0	0	0.333333	0	0	['ast', 'inh', 'oli']	['ast', 'ex', 'inh', 'oli']
2032	ENSG00000272751	full-splice_match	0	0.375	0	0	0.0625	0.5625	0	0	0.0666667	0.266667	0.333333	0	0	0.333333	0	0	['ex', 'opc', 'oli']	['ast', 'ex', 'inh', 'oli']
2035	NDUFA3	full-splice_match	0.0601093	0.169399	0.0874317	0.0136612	0.0382514	0.625683	0	0.00546448	0.0491803	0.165756	0.114754	0.0145719	0.0309654	0.624772	0	0	['ast', 'ex', 'inh', 'oli']	['ex', 'inh', 'oli']
2049	TFPT	full-splice_match	0.142857	0.142857	0	0.142857	0	0.571429	0	0	0	0.444444	0.111111	0.111111	0	0.333333	0	0	['ast', 'ex', 'mic', 'oli']	['ex', 'inh', 'mic', 'oli']
2055	CNOT3	incomplete-splice_match	0.333333	0	0	0	0.166667	0.5	0	0	0.0909091	0.818182	0.0909091	0	0	0	0	0	['ast', 'opc', 'oli']	['ast', 'ex', 'inh']
2056	CNOT3	incomplete-splice_match	0	0.5	0	0	0	0.5	0	0	0.153846	0.230769	0.0769231	0.0769231	0.0769231	0.384615	0	0	['ex', 'oli']	['ast', 'ex', 'inh', 'mic', 'opc', 'oli']
2057	LENG1	full-splice_match	0.0666667	0.0666667	0.133333	0	0	0.733333	0	0	0	0	0	0	0.0714286	0.928571	0	0	['ast', 'ex', 'inh', 'oli']	['opc', 'oli']
2059	TSEN34	full-splice_match	0	0	0	0	0.25	0.75	0	0	0.0434783	0.304348	0.130435	0.0434783	0.0434783	0.434783	0	0	['opc', 'oli']	['ex', 'inh', 'oli']
2060	TSEN34	full-splice_match	0	0	0.181818	0	0.0909091	0.727273	0	0	0.166667	0	0.25	0	0.25	0.333333	0	0	['inh', 'opc', 'oli']	['ast', 'inh', 'opc', 'oli']
2061	RPS9	full-splice_match	0.0444444	0.0740741	0.0222222	0.0814815	0.0444444	0.733333	0	0	0	0	0.333333	0.333333	0	0.333333	0	0	['ex', 'mic', 'oli']	['inh', 'mic', 'oli']
2064	TTYH1	full-splice_match	0.0892857	0	0	0.0178571	0.0357143	0.857143	0	0	0.202128	0.0106383	0.0106383	0	0.0851064	0.691489	0	0	['ast', 'oli']	['ast', 'opc', 'oli']
2080	TTYH1	full-splice_match	0.210084	0.00420168	0.00420168	0	0.0336134	0.747899	0	0	0.318182	0.0272727	0.00909091	0	0.0272727	0.618182	0	0	['ast', 'oli']	['ast', 'oli']
2082	TTYH1	full-splice_match	0.225806	0.483871	0.0645161	0	0	0.225806	0	0	0.5	0.166667	0	0	0	0.333333	0	0	['ast', 'ex', 'inh', 'oli']	['ast', 'ex', 'oli']
2097	LENG9	full-splice_match	0.1	0.2	0	0	0	0.6	0	0.1	0	0.1875	0.0625	0.0625	0.125	0.5625	0	0	['ast', 'ex', 'end', 'oli']	['ex', 'inh', 'mic', 'opc', 'oli']
2100	NDUFA3	full-splice_match	0.0367647	0.316176	0.0735294	0.0294118	0.0294118	0.507353	0	0.00735294	0.0486486	0.135135	0.113514	0.027027	0.0216216	0.654054	0	0	['ex', 'inh', 'oli']	['ex', 'inh', 'oli']
2108	TFPT	full-splice_match	0	0	0	0	0	1	0	0	0.2	0.2	0.3	0	0	0.3	0	0	['oli']	['ast', 'ex', 'inh', 'oli']
2110	PRPF31	full-splice_match	0	0	0	0	0.333333	0.666667	0	0	0	0	0	0	0	1	0	0	['opc', 'oli']	['oli']
2115	LENG1	full-splice_match	0	0	0.0833333	0	0.0833333	0.833333	0	0	0.111111	0.111111	0	0	0.111111	0.666667	0	0	['inh', 'opc', 'oli']	['ast', 'ex', 'opc', 'oli']
2117	RPS9	full-splice_match	0.0600601	0.174174	0.0720721	0.0900901	0.033033	0.561562	0.003003	0.00600601	0.052506	0.150358	0.071599	0.0596659	0.0167064	0.642005	0	0.0071599	['ast', 'ex', 'inh', 'mic', 'oli']	['ast', 'ex', 'inh', 'mic', 'oli']
2128	NDUFA3	full-splice_match	0.0555556	0.282407	0.0833333	0.0138889	0.0416667	0.509259	0	0.0138889	0.0506912	0.184332	0.101382	0.0184332	0.0322581	0.612903	0	0	['ast', 'ex', 'inh', 'oli']	['ast', 'ex', 'inh', 'oli']
2138	TFPT	full-splice_match	0	0.6	0	0	0	0.4	0	0	0	0	0.3	0.1	0.1	0.5	0	0	['ex', 'oli']	['inh', 'mic', 'opc', 'oli']
2142	LENG1	full-splice_match	0	0.181818	0	0	0.0909091	0.727273	0	0	0.125	0.25	0.125	0.125	0	0.375	0	0	['ex', 'opc', 'oli']	['ast', 'ex', 'inh', 'mic', 'oli']
2144	MBOAT7	incomplete-splice_match	0.164179	0.0895522	0.119403	0.0447761	0.0298507	0.537313	0	0.0149254	0	0.166667	0.166667	0	0.166667	0.5	0	0	['ast', 'ex', 'inh', 'oli']	['ex', 'inh', 'opc', 'oli']
2146	RPS9	full-splice_match	0.0327103	0.224299	0.046729	0.0280374	0.0327103	0.626168	0	0.00934579	0.0387324	0.112676	0.0774648	0.0457746	0.0316901	0.68662	0	0.00704225	['ex', 'oli']	['ex', 'inh', 'oli']
2150	RPS9	novel_in_catalog	0.181818	0.545455	0.0909091	0	0	0.181818	0	0	0	0.0909091	0	0	0	0.909091	0	0	['ast', 'ex', 'inh', 'oli']	['ex', 'oli']
2152	RPS9	novel_not_in_catalog	0	0.125	0.5	0	0	0.25	0	0.125	0	0	0	0.5	0	0.5	0	0	['ex', 'end', 'inh', 'oli']	['mic', 'oli']
2154	RPS9	incomplete-splice_match	0	0.25	0	0	0	0.75	0	0	0	0.272727	0.0909091	0	0.181818	0.363636	0	0.0909091	['ex', 'oli']	['ex', 'end', 'inh', 'opc', 'oli']
2158	NDUFA3	full-splice_match	0.0507812	0.203125	0.09375	0.0234375	0.0429688	0.585938	0	0	0.0512821	0.141026	0.0929487	0.0128205	0.025641	0.673077	0	0.00320513	['ast', 'ex', 'inh', 'oli']	['ast', 'ex', 'inh', 'oli']
2169	TFPT	full-splice_match	0	0.333333	0	0	0	0.666667	0	0	0	0.166667	0.166667	0	0.166667	0.5	0	0	['ex', 'oli']	['ex', 'inh', 'opc', 'oli']
2175	LENG1	full-splice_match	0	0	0	0	0.0714286	0.928571	0	0	0	0.0625	0.0625	0.0625	0	0.8125	0	0	['opc', 'oli']	['ex', 'inh', 'mic', 'oli']
2178	RPS9	full-splice_match	0.0332103	0.0369004	0.0590406	0.0332103	0.0332103	0.797048	0	0.00738007	0.0290698	0.127907	0.0813953	0.0639535	0.0377907	0.65407	0	0.00581395	['inh', 'oli']	['ex', 'inh', 'mic', 'oli']
2189	NDUFA3	full-splice_match	0.0496988	0.186747	0.0677711	0.0225904	0.0256024	0.635542	0.00150602	0.0105422	0.0469484	0.122066	0.0798122	0.0246479	0.036385	0.688967	0.00117371	0	['ex', 'inh', 'oli']	['ex', 'inh', 'oli']
2199	TFPT	full-splice_match									0	0.375	0.25	0.125	0	0.25	0	0	[]	['ex', 'inh', 'mic', 'oli']
2200	PRPF31	full-splice_match	0.047619	0.47619	0.0952381	0.047619	0.047619	0.238095	0	0.047619	0	0	0	0.1	0.2	0.7	0	0	['ex', 'inh', 'oli']	['mic', 'opc', 'oli']
2205	LENG1	full-splice_match	0	0.142857	0	0	0	0.857143	0	0	0	0	0.2	0.2	0.2	0.4	0	0	['ex', 'oli']	['inh', 'mic', 'opc', 'oli']
2207	RPS9	full-splice_match	0.0328947	0.0263158	0.0526316	0.0986842	0.0394737	0.736842	0	0.0131579	0.0196078	0.0784314	0.0718954	0.0261438	0.0326797	0.75817	0	0.0130719	['inh', 'mic', 'oli']	['ex', 'inh', 'oli']
2210	RPS9	incomplete-splice_match	0	0.615385	0.179487	0.025641	0.025641	0.153846	0	0	0	0.384615	0.0769231	0	0	0.538462	0	0	['ex', 'inh', 'oli']	['ex', 'inh', 'oli']
2218	NDUFA3	full-splice_match	0.0517241	0.125	0.0991379	0.0387931	0.0258621	0.659483	0	0	0.0533981	0.162621	0.11165	0.0242718	0.026699	0.618932	0	0.00242718	['ast', 'ex', 'inh', 'oli']	['ast', 'ex', 'inh', 'oli']
2222	NDUFA3	novel_not_in_catalog	0	0	0	0	0.125	0.875	0	0	0	0	0.111111	0	0	0.888889	0	0	['opc', 'oli']	['inh', 'oli']
2226	TFPT	full-splice_match	0	0	0	0	0	1	0	0	0.0714286	0.285714	0.214286	0.142857	0.0714286	0.214286	0	0	['oli']	['ast', 'ex', 'inh', 'mic', 'opc', 'oli']
2228	PRPF31	full-splice_match	0.0714286	0.285714	0.142857	0	0	0.5	0	0	0.0909091	0.363636	0.181818	0	0	0.363636	0	0	['ast', 'ex', 'inh', 'oli']	['ast', 'ex', 'inh', 'oli']
2234	LENG1	full-splice_match	0.0952381	0.0952381	0.047619	0.047619	0	0.714286	0	0	0	0.178571	0.0357143	0.0357143	0.0714286	0.678571	0	0	['ast', 'ex', 'oli']	['ex', 'opc', 'oli']
2237	RPS9	full-splice_match	0.0452489	0.176471	0.0542986	0.0588235	0.0452489	0.61991	0	0	0.0421053	0.0421053	0.0894737	0.0947368	0.0473684	0.673684	0.00526316	0.00526316	['ex', 'inh', 'mic', 'oli']	['inh', 'mic', 'oli']
2241	RPS9	novel_not_in_catalog	0.105263	0.157895	0.157895	0	0	0.526316	0	0.0526316	0	0.142857	0.142857	0	0	0.714286	0	0	['ast', 'ex', 'end', 'inh', 'oli']	['ex', 'inh', 'oli']
2244	NDUFA3	full-splice_match	0.0756972	0.326693	0.059761	0.0239044	0.0239044	0.486056	0	0.00398406	0.0349076	0.205339	0.112936	0.0225873	0.036961	0.585216	0	0.00205339	['ast', 'ex', 'inh', 'oli']	['ex', 'inh', 'oli']
2252	TFPT	full-splice_match	0.0909091	0	0.0909091	0.272727	0	0.545455	0	0	0	0.333333	0.666667	0	0	0	0	0	['ast', 'inh', 'mic', 'oli']	['ex', 'inh']
2266	TSEN34	full-splice_match	0	0	0	0	0.333333	0.666667	0	0	0	0.0769231	0.307692	0.0769231	0.0769231	0.461538	0	0	['opc', 'oli']	['ex', 'inh', 'mic', 'opc', 'oli']
2267	RPS9	full-splice_match	0.0367347	0.232653	0.0326531	0.0367347	0.0204082	0.620408	0	0.0204082	0.026936	0.171717	0.040404	0.0606061	0.020202	0.676768	0	0.003367	['ex', 'oli']	['ex', 'mic', 'oli']
2275	RPS9	full-splice_match	0.219512	0.0731707	0.170732	0.121951	0.0243902	0.390244	0	0	0.0238095	0.0952381	0.0238095	0.0238095	0.0952381	0.738095	0	0	['ast', 'ex', 'inh', 'mic', 'oli']	['ex', 'opc', 'oli']
2276	RPS9	full-splice_match	0.166667	0.0833333	0	0	0	0.75	0	0	0	0.08	0.2	0.18	0.02	0.52	0	0	['ast', 'ex', 'oli']	['ex', 'inh', 'mic', 'oli']
2278	TTYH1	full-splice_match	0.340314	0.274869	0.0026178	0.0026178	0.0340314	0.34555	0	0	0.223938	0.030888	0	0.003861	0.100386	0.640927	0	0	['ast', 'ex', 'oli']	['ast', 'opc', 'oli']
2284	TTYH1	full-splice_match	0.0895522	0.0149254	0.00746269	0	0.0298507	0.858209	0	0	0.0869565	0.173913	0	0	0.130435	0.608696	0	0	['ast', 'oli']	['ast', 'ex', 'opc', 'oli']
2293	TTYH1	incomplete-splice_match	0	0	0	0	0.166667	0.833333	0	0	0.285714	0	0	0	0	0.714286	0	0	['opc', 'oli']	['ast', 'oli']
2304	LENG9	full-splice_match	0.344828	0.413793	0.103448	0	0	0.137931	0	0	0.0909091	0.363636	0.0909091	0	0	0.454545	0	0	['ast', 'ex', 'inh', 'oli']	['ast', 'ex', 'inh', 'oli']
2310	NDUFA3	full-splice_match	0.0714286	0.25974	0.0714286	0.025974	0.025974	0.538961	0.00649351	0	0.0550847	0.224576	0.122881	0.0169492	0.0338983	0.542373	0	0.00423729	['ast', 'ex', 'inh', 'oli']	['ast', 'ex', 'inh', 'oli']
2318	TFPT	full-splice_match	0	0	0	0	0	1	0	0	0.166667	0	0.333333	0	0	0.5	0	0	['oli']	['ast', 'inh', 'oli']
2325	CNOT3	incomplete-splice_match	0.266667	0	0	0	0.133333	0.6	0	0	0.0714286	0.285714	0.357143	0	0.0714286	0.214286	0	0	['ast', 'opc', 'oli']	['ast', 'ex', 'inh', 'opc', 'oli']
2326	LENG1	full-splice_match	0	0.234043	0.12766	0	0.0212766	0.617021	0	0	0.142857	0	0	0	0	0.857143	0	0	['ex', 'inh', 'oli']	['ast', 'oli']
2330	RPS9	full-splice_match	0.0136612	0.172131	0.0464481	0.0409836	0.0355191	0.677596	0	0.0136612	0.0569745	0.0726916	0.0510806	0.0373281	0.0255403	0.746562	0	0.00982318	['ex', 'oli']	['ast', 'ex', 'inh', 'oli']
2341	TAMM41	full-splice_match	0.375	0.25	0.125	0	0	0.25	0	0	0	0.5	0.214286	0	0.0714286	0.214286	0	0	['ast', 'ex', 'inh', 'oli']	['ex', 'inh', 'opc', 'oli']
2345	SMDT1	full-splice_match	0.0327103	0.439252	0.088785	0.0186916	0.0233645	0.392523	0	0.0046729	0.0588235	0.294118	0.127451	0.0196078	0.0637255	0.436275	0	0	['ex', 'inh', 'oli']	['ast', 'ex', 'inh', 'opc', 'oli']
2353	SMDT1	full-splice_match	0.142857	0.285714	0.047619	0	0	0.52381	0	0	0.03125	0.125	0.125	0.03125	0.03125	0.65625	0	0	['ast', 'ex', 'oli']	['ex', 'inh', 'oli']
2359	NDUFA6	full-splice_match	0.102273	0.238636	0.0568182	0.0454545	0.0568182	0.454545	0	0.0454545	0.0805369	0.187919	0.14094	0.0402685	0.033557	0.489933	0.00671141	0.0201342	['ast', 'ex', 'inh', 'opc', 'oli']	['ast', 'ex', 'inh', 'oli']
2363	OLA1P1	full-splice_match	0	0.666667	0	0	0	0.333333	0	0	0	0.285714	0	0	0	0.714286	0	0	['ex', 'oli']	['ex', 'oli']
2368	ENSG00000276345	full-splice_match	0.0227273	0.363636	0.181818	0.0681818	0.0454545	0.318182	0	0	0.035533	0.0862944	0.0558376	0.035533	0.0304569	0.720812	0	0.035533	['ex', 'inh', 'mic', 'oli']	['ex', 'inh', 'oli']
2421	ENSG00000278817	novel_in_catalog	0.220339	0.457627	0.118644	0	0.0169492	0.186441	0	0	0.0857143	0.528571	0.114286	0.0142857	0.0714286	0.185714	0	0	['ast', 'ex', 'inh', 'oli']	['ast', 'ex', 'inh', 'opc', 'oli']
2424	ENSG00000278817	full-splice_match	0.0769231	0.420118	0.0650888	0.0177515	0.106509	0.307692	0.00591716	0	0.0879121	0.401099	0.115385	0.010989	0.0769231	0.307692	0	0	['ast', 'ex', 'inh', 'opc', 'oli']	['ast', 'ex', 'inh', 'opc', 'oli']
2425	ENSG00000278817	incomplete-splice_match	0.241379	0.0517241	0.103448	0	0.103448	0.5	0	0	0.202247	0.157303	0.101124	0	0.123596	0.41573	0	0	['ast', 'ex', 'inh', 'opc', 'oli']	['ast', 'ex', 'inh', 'opc', 'oli']
2429	ENSG00000277196	incomplete-splice_match	0.651685	0.101124	0.0449438	0.011236	0.0224719	0.146067	0.011236	0.011236	0.771429	0.0142857	0.0142857	0	0.0714286	0.114286	0.0142857	0	['ast', 'ex', 'oli']	['ast', 'opc', 'oli']
2444	PANK4	incomplete-splice_match	0.243902	0.146341	0.170732	0.0243902	0	0.414634	0	0	0.0786517	0.404494	0.0786517	0.0449438	0.0786517	0.314607	0	0	['ast', 'ex', 'inh', 'oli']	['ast', 'ex', 'inh', 'opc', 'oli']
2447	HES5	full-splice_match	0.733333	0.133333	0	0	0.1	0	0	0.0333333	0.517857	0.196429	0.0714286	0	0.178571	0.0357143	0	0	['ast', 'ex', 'opc']	['ast', 'ex', 'inh', 'opc']
2448	ENSG00000281734	full-splice_match	0.0789474	0.763158	0.105263	0	0	0.0526316	0	0	0.047619	0.761905	0.190476	0	0	0	0	0	['ast', 'ex', 'inh', 'oli']	['ex', 'inh']
2452	TTC34	full-splice_match	0.285714	0.571429	0	0	0.142857	0	0	0	0.142857	0.857143	0	0	0	0	0	0	['ast', 'ex', 'opc']	['ast', 'ex']
2466	SDCCAG8	incomplete-splice_match	0.25	0.25	0.15	0	0	0.35	0	0	0.230769	0.230769	0.0384615	0.0384615	0.0769231	0.384615	0	0	['ast', 'ex', 'inh', 'oli']	['ast', 'ex', 'opc', 'oli']
2473	SDCCAG8	novel_not_in_catalog	0	1	0	0	0	0	0	0	0	0.333333	0	0	0	0.666667	0	0	['ex']	['ex', 'oli']
2475	CEP170	incomplete-splice_match	0	0	0	0	0	1	0	0	0	0.333333	0.111111	0	0	0.555556	0	0	['oli']	['ex', 'inh', 'oli']
2477	AKT3	novel_not_in_catalog	0.0512821	0.346154	0.153846	0.0128205	0.0512821	0.358974	0	0.025641	0.038961	0.285714	0.168831	0.0779221	0.0779221	0.350649	0	0	['ast', 'ex', 'inh', 'opc', 'oli']	['ex', 'inh', 'mic', 'opc', 'oli']
2487	CEP170	incomplete-splice_match	0.0555556	0.166667	0.111111	0.0555556	0	0.555556	0.0555556	0	0	0.0625	0.125	0.0625	0.125	0.625	0	0	['ast', 'ex', 'inh', 'mic', 'oli', 'per']	['ex', 'inh', 'mic', 'opc', 'oli']
2495	AKT3	incomplete-splice_match	0	0.666667	0	0	0	0.333333	0	0	0.2	0.2	0.2	0	0.2	0.2	0	0	['ex', 'oli']	['ast', 'ex', 'inh', 'opc', 'oli']
2499	AKT3	novel_not_in_catalog	0.0555556	0.555556	0.0555556	0	0	0.333333	0	0	0	0.125	0.25	0	0.125	0.5	0	0	['ast', 'ex', 'inh', 'oli']	['ex', 'inh', 'opc', 'oli']
2503	AKT3	novel_not_in_catalog	0.25	0	0	0	0	0.75	0	0	0.1	0.5	0	0	0	0.4	0	0	['ast', 'oli']	['ast', 'ex', 'oli']
2506	AKT3	novel_not_in_catalog	0	0.666667	0	0	0	0.333333	0	0	0	0.5	0	0	0	0.5	0	0	['ex', 'oli']	['ex', 'oli']
2510	ENSG00000280906	full-splice_match	0.333333	0	0	0	0	0.666667	0	0	0	0.5	0.1	0	0.3	0.1	0	0	['ast', 'oli']	['ex', 'inh', 'opc', 'oli']
2512	ENSG00000280708	full-splice_match	0	0.6	0.2	0	0	0.2	0	0	0	0.777778	0	0	0.111111	0.111111	0	0	['ex', 'inh', 'oli']	['ex', 'opc', 'oli']
2516	ENSG00000280591	full-splice_match	0.166667	0.333333	0.5	0	0	0	0	0	0.125	0.25	0.5	0	0.125	0	0	0	['ast', 'ex', 'inh']	['ast', 'ex', 'inh', 'opc']
2527	TRAPPC12	incomplete-splice_match	0.212121	0.424242	0.0909091	0	0	0.272727	0	0	0.175	0.425	0.15	0	0.075	0.175	0	0	['ast', 'ex', 'inh', 'oli']	['ast', 'ex', 'inh', 'opc', 'oli']
2528	TRAPPC12	full-splice_match	0.0882353	0.441176	0.205882	0	0.0588235	0.205882	0	0	0.0547945	0.616438	0.219178	0.0136986	0.0273973	0.0684932	0	0	['ast', 'ex', 'inh', 'opc', 'oli']	['ast', 'ex', 'inh', 'oli']
2529	ADI1	full-splice_match	0.148515	0.118812	0.138614	0.019802	0.049505	0.514851	0	0.00990099	0.0756303	0.466387	0.10084	0.012605	0.0336134	0.306723	0.00420168	0	['ast', 'ex', 'inh', 'oli']	['ast', 'ex', 'inh', 'oli']
2530	ENSG00000280944	full-splice_match	0.0677966	0.211864	0.161017	0	0.0338983	0.508475	0.00847458	0.00847458	0.0416667	0.291667	0.125	0	0.0277778	0.513889	0	0	['ast', 'ex', 'inh', 'oli']	['ex', 'inh', 'oli']
2534	FAM240C	full-splice_match	0.375	0.25	0.25	0	0	0.125	0	0	0.615385	0.153846	0.0769231	0	0	0.153846	0	0	['ast', 'ex', 'inh', 'oli']	['ast', 'ex', 'inh', 'oli']
2545	RPS24P9	full-splice_match	0.25	0.75	0	0	0	0	0	0	0.4	0.6	0	0	0	0	0	0	['ast', 'ex']	['ast', 'ex']
2554	BDH1	full-splice_match	0	0.789474	0.157895	0	0.0526316	0	0	0	0.0714286	0.285714	0	0.0714286	0	0.571429	0	0	['ex', 'inh', 'opc']	['ast', 'ex', 'mic', 'oli']
2557	BDH1	full-splice_match	0.0526316	0.684211	0.0526316	0	0	0.210526	0	0	0	0.473684	0.368421	0	0.0526316	0.105263	0	0	['ast', 'ex', 'inh', 'oli']	['ex', 'inh', 'opc', 'oli']
2562	ANKRD18DP	full-splice_match	0	1	0	0	0	0	0	0	0	0.142857	0.428571	0.428571	0	0	0	0	['ex']	['ex', 'inh', 'mic']
2565	KCNIP4	full-splice_match	0	0.86747	0.108434	0	0.0240964	0	0	0	0	0.851852	0.118519	0	0.0296296	0	0	0	['ex', 'inh']	['ex', 'inh']
2566	RPL31P25	full-splice_match	0	0.705882	0.176471	0	0.117647	0	0	0	0	0.692308	0.192308	0	0.0384615	0.0769231	0	0	['ex', 'inh', 'opc']	['ex', 'inh', 'oli']
2572	DYNLT2	full-splice_match	0.0967742	0.290323	0.0806452	0.0322581	0.016129	0.467742	0	0.016129	0.097561	0.243902	0.097561	0.0487805	0	0.512195	0	0	['ast', 'ex', 'inh', 'oli']	['ast', 'ex', 'inh', 'oli']
2577	ERMARD	incomplete-splice_match	0.142857	0.357143	0.357143	0	0	0.142857	0	0	0.128205	0.192308	0.115385	0.025641	0.0512821	0.487179	0	0	['ast', 'ex', 'inh', 'oli']	['ast', 'ex', 'inh', 'opc', 'oli']
2578	ENSG00000281833	full-splice_match	0.125	0.375	0	0	0.125	0.375	0	0	0.0833333	0.166667	0.0833333	0.0833333	0.0833333	0.5	0	0	['ast', 'ex', 'opc', 'oli']	['ast', 'ex', 'inh', 'mic', 'opc', 'oli']
2588	FAM120B	incomplete-splice_match	0.269231	0.269231	0.0384615	0.0384615	0.0384615	0.307692	0	0.0384615	0.0555556	0.277778	0.0555556	0	0.111111	0.5	0	0	['ast', 'ex', 'oli']	['ast', 'ex', 'inh', 'opc', 'oli']
2590	FAM120B	incomplete-splice_match	0.1	0.425	0.1	0	0.075	0.3	0	0	0.162162	0.351351	0.189189	0	0	0.297297	0	0	['ast', 'ex', 'inh', 'opc', 'oli']	['ast', 'ex', 'inh', 'oli']
2595	THEMIS	incomplete-splice_match	0	1	0	0	0	0	0	0	0	1	0	0	0	0	0	0	['ex']	['ex']
2606	PTPRK	incomplete-splice_match	0	0	0	0	0	1	0	0	0	0	0.2	0	0	0.8	0	0	['oli']	['inh', 'oli']
2621	PTPRK	full-splice_match	0.0232558	0.116279	0	0.0232558	0	0.837209	0	0	0	0.25	0.0454545	0	0.0454545	0.659091	0	0	['ex', 'oli']	['ex', 'oli']
2635	EPHB6	novel_not_in_catalog	0	1	0	0	0	0	0	0	0	0.5	0.4	0	0	0.1	0	0	['ex']	['ex', 'inh', 'oli']
2637	EPHB6	incomplete-splice_match	0	0.625	0.25	0	0	0.125	0	0	0	0.888889	0.111111	0	0	0	0	0	['ex', 'inh', 'oli']	['ex', 'inh']
2638	EPHB6	novel_in_catalog	0.03125	0.84375	0.0625	0.03125	0	0.03125	0	0	0	0.882353	0.0588235	0	0	0	0.0588235	0	['ex', 'inh']	['ex', 'inh', 'per']
2639	EPHB6	incomplete-splice_match	0.0246914	0.8107	0.127572	0.00823045	0.00411523	0.0205761	0	0.00411523	0.0197044	0.600985	0.325123	0.00985222	0.00985222	0.0344828	0	0	['ex', 'inh']	['ex', 'inh']
2640	EPHB6	novel_in_catalog	0	0.857143	0	0.142857	0	0	0	0	0	0.5	0.5	0	0	0	0	0	['ex', 'mic']	['ex', 'inh']
2648	NAPEPLD	full-splice_match	0.0338983	0.0677966	0	0	0.101695	0.79661	0	0	0.0526316	0.131579	0.0263158	0	0.0921053	0.697368	0	0	['ex', 'opc', 'oli']	['ast', 'ex', 'opc', 'oli']
2649	NAPEPLD	incomplete-splice_match	0.166667	0.25	0.0833333	0	0.0833333	0.416667	0	0	0.125	0.25	0	0	0	0.625	0	0	['ast', 'ex', 'inh', 'opc', 'oli']	['ast', 'ex', 'oli']
2651	NAPEPLD	incomplete-splice_match	0.12	0.32	0.12	0.04	0.04	0.36	0	0	0.0833333	0.166667	0.0833333	0	0.0833333	0.583333	0	0	['ast', 'ex', 'inh', 'oli']	['ast', 'ex', 'inh', 'opc', 'oli']
2652	ENSG00000282463	full-splice_match	0	0.454545	0.0909091	0	0	0.454545	0	0	0	0	0	0.5	0	0.5	0	0	['ex', 'inh', 'oli']	['mic', 'oli']
2655	NAPEPLD	novel_not_in_catalog	0.125	0.1875	0	0	0	0.6875	0	0	0.285714	0	0	0	0	0.714286	0	0	['ast', 'ex', 'oli']	['ast', 'oli']
2657	NAPEPLD	incomplete-splice_match	0.0357143	0.0714286	0	0.0357143	0.0714286	0.785714	0	0	0	0	0.5	0	0	0.5	0	0	['ex', 'opc', 'oli']	['inh', 'oli']
2660	ARMC10	incomplete-splice_match	0	0.12	0	0	0	0.88	0	0	0	0.277778	0.138889	0	0.0277778	0.555556	0	0	['ex', 'oli']	['ex', 'inh', 'oli']
2662	ARMC10	full-splice_match	0.111111	0.0555556	0	0	0	0.833333	0	0	0	0.0625	0.1875	0.03125	0	0.71875	0	0	['ast', 'ex', 'oli']	['ex', 'inh', 'oli']
2665	CNTNAP2	full-splice_match	0.05	0.2	0.375	0	0.025	0.35	0	0	0	0	0.478261	0	0.0434783	0.478261	0	0	['ast', 'ex', 'inh', 'oli']	['inh', 'oli']
2669	CNTNAP2	full-splice_match	0	0.545455	0.318182	0	0	0.136364	0	0	0	0	0.333333	0.333333	0	0.333333	0	0	['ex', 'inh', 'oli']	['inh', 'mic', 'oli']
2670	CNTNAP2	incomplete-splice_match	0	0.653846	0.115385	0	0.0384615	0.192308	0	0	0	0	1	0	0	0	0	0	['ex', 'inh', 'oli']	['inh']
2671	CNTNAP2	incomplete-splice_match	0.0909091	0.181818	0.272727	0	0	0.363636	0	0.0909091	0	0.421053	0.473684	0	0	0.105263	0	0	['ast', 'ex', 'end', 'inh', 'oli']	['ex', 'inh', 'oli']
2672	DTX2	full-splice_match	0.0869565	0.173913	0	0.0434783	0.0434783	0.652174	0	0	0.0952381	0	0	0.238095	0.0952381	0.571429	0	0	['ast', 'ex', 'oli']	['ast', 'mic', 'opc', 'oli']
2676	LINC03009	incomplete-splice_match	0.115385	0.269231	0.115385	0	0.0769231	0.384615	0	0.0384615	0.0909091	0.363636	0.136364	0	0	0.409091	0	0	['ast', 'ex', 'inh', 'opc', 'oli']	['ast', 'ex', 'inh', 'oli']
2677	POMZP3	full-splice_match	0.0816327	0.122449	0.0612245	0.0408163	0.0204082	0.673469	0	0	0	0	0.027027	0	0.027027	0.945946	0	0	['ast', 'ex', 'inh', 'oli']	['oli']
2680	POMZP3	incomplete-splice_match	0	0.681818	0.0909091	0	0	0.181818	0	0.0454545	0.0625	0.25	0.3125	0	0.125	0.25	0	0	['ex', 'inh', 'oli']	['ast', 'ex', 'inh', 'opc', 'oli']
2694	ZNF251	incomplete-splice_match	0.1	0.5	0.1	0	0	0.3	0	0	0.0625	0.6875	0	0	0.0625	0.1875	0	0	['ast', 'ex', 'inh', 'oli']	['ast', 'ex', 'opc', 'oli']
2696	ZC3H3	incomplete-splice_match	0.2	0.2	0.2	0	0.2	0.2	0	0	0	0.6	0.2	0	0	0.2	0	0	['ast', 'ex', 'inh', 'opc', 'oli']	['ex', 'inh', 'oli']
2698	NAPRT	full-splice_match	0.214286	0.5	0.214286	0	0	0.0714286	0	0	0	1	0	0	0	0	0	0	['ast', 'ex', 'inh', 'oli']	['ex']
2700	NAPRT	full-splice_match	0.0526316	0.157895	0.0526316	0	0.105263	0.631579	0	0	0	0	0	0	0.125	0.75	0.125	0	['ast', 'ex', 'inh', 'opc', 'oli']	['opc', 'oli', 'per']
2701	EEF1D	full-splice_match	0.0388693	0.293286	0.113074	0.0353357	0.0282686	0.484099	0	0.00706714	0.0609756	0.054878	0.0670732	0.0426829	0.0304878	0.731707	0.00304878	0.00914634	['ex', 'inh', 'oli']	['ast', 'ex', 'inh', 'oli']
2708	EEF1D	full-splice_match	0.0510204	0.0714286	0.102041	0.0306122	0.0102041	0.714286	0.0102041	0.0102041	0.0491803	0.218579	0.136612	0.0218579	0.010929	0.557377	0	0.00546448	['ast', 'ex', 'inh', 'oli']	['ex', 'inh', 'oli']
2712	TIGD5	full-splice_match	0.015625	0.359375	0.21875	0.015625	0.046875	0.34375	0	0	0.0526316	0.561404	0.0877193	0	0.0350877	0.263158	0	0	['ex', 'inh', 'oli']	['ast', 'ex', 'inh', 'oli']
2714	GFUS	full-splice_match	0	0	0	0.111111	0.111111	0.777778	0	0	0.0344828	0.448276	0.206897	0	0.137931	0.172414	0	0	['mic', 'opc', 'oli']	['ex', 'inh', 'opc', 'oli']
2715	ZNF623	full-splice_match	0.0841121	0.373832	0.17757	0.046729	0	0.308411	0.00934579	0	0.0666667	0.533333	0.133333	0.0333333	0	0.233333	0	0	['ast', 'ex', 'inh', 'oli']	['ast', 'ex', 'inh', 'oli']
2723	IQANK1	full-splice_match	0	1	0	0	0	0	0	0	0	0.8	0.2	0	0	0	0	0	['ex']	['ex', 'inh']
2734	LY6E	full-splice_match	0.0663265	0.647959	0.132653	0.0561224	0.0153061	0.0306122	0	0.0510204	0.00337838	0.679054	0.209459	0.0337838	0.0168919	0.0439189	0.00337838	0.0101351	['ast', 'ex', 'end', 'inh', 'mic']	['ex', 'inh']
2737	LY6E	incomplete-splice_match	0	1	0	0	0	0	0	0	0	1	0	0	0	0	0	0	['ex']	['ex']
2746	LY6H	full-splice_match	0	0.6	0.2	0	0.2	0	0	0	0	0.344828	0.465517	0	0.155172	0.0344828	0	0	['ex', 'inh', 'opc']	['ex', 'inh', 'opc']
2747	LY6H	full-splice_match	0	1	0	0	0	0	0	0	0	0.666667	0.333333	0	0	0	0	0	['ex']	['ex', 'inh']
2748	LY6H	incomplete-splice_match	0	0.714286	0.142857	0	0.0714286	0.0714286	0	0	0	0.611111	0.222222	0	0.111111	0.0555556	0	0	['ex', 'inh', 'opc', 'oli']	['ex', 'inh', 'opc', 'oli']
2752	LY6H	full-splice_match	0.0223097	0.653543	0.250656	0.00262467	0.0485564	0.019685	0	0.00262467	0.0056101	0.59467	0.314165	0.00420757	0.0575035	0.0238429	0	0	['ex', 'inh']	['ex', 'inh', 'opc']
2755	LY6H	novel_not_in_catalog	0	0.666667	0.222222	0.111111	0	0	0	0	0	0.236842	0.342105	0	0.368421	0.0526316	0	0	['ex', 'inh', 'mic']	['ex', 'inh', 'opc', 'oli']
2758	LY6H	novel_in_catalog	0	1	0	0	0	0	0	0	0	0.428571	0.428571	0	0	0.142857	0	0	['ex']	['ex', 'inh', 'oli']
2760	LY6H	incomplete-splice_match	0	0.933333	0.0666667	0	0	0	0	0	0.25	0.75	0	0	0	0	0	0	['ex', 'inh']	['ast', 'ex']
2762	LY6H	full-splice_match	0	0	0	0	1	0	0	0	0	0.685279	0.263959	0	0.0253807	0.0253807	0	0	['opc']	['ex', 'inh']
2765	ENSG00000282245	full-splice_match	0	0.7	0.3	0	0	0	0	0	0	0.888889	0.111111	0	0	0	0	0	['ex', 'inh']	['ex', 'inh']
2769	ARHGEF10	incomplete-splice_match	0.184211	0.0263158	0	0	0	0.710526	0	0.0789474	0.205882	0	0	0	0	0.794118	0	0	['ast', 'end', 'oli']	['ast', 'oli']
2777	KBTBD11	novel_not_in_catalog	0.0140845	0.591549	0.140845	0	0	0.253521	0	0	0.0987654	0.308642	0.0617284	0.0246914	0.0123457	0.493827	0	0	['ex', 'inh', 'oli']	['ast', 'ex', 'inh', 'oli']
2778	KBTBD11	novel_in_catalog	0.176471	0.411765	0.117647	0	0	0.294118	0	0	0.111111	0.444444	0	0	0.111111	0.333333	0	0	['ast', 'ex', 'inh', 'oli']	['ast', 'ex', 'opc', 'oli']
2784	MYOM2	full-splice_match	0.0217391	0.826087	0.0434783	0.0217391	0	0.0869565	0	0	0.030303	0.848485	0.030303	0	0	0.0909091	0	0	['ex', 'oli']	['ex', 'oli']
2787	ADAM9	full-splice_match	0.0344828	0.0574713	0.0114943	0.045977	0.0229885	0.827586	0	0	0.0487805	0.0487805	0.0731707	0.146341	0.0731707	0.609756	0	0	['ex', 'oli']	['inh', 'mic', 'opc', 'oli']
2792	PLPPR1	incomplete-splice_match	0	0.0125	0.0625	0	0.15	0.775	0	0	0.0232558	0	0.0232558	0	0.325581	0.627907	0	0	['inh', 'opc', 'oli']	['opc', 'oli']
2793	PLPPR1	incomplete-splice_match	0	0	0	0	0.0869565	0.913043	0	0	0.05	0	0	0	0.4	0.55	0	0	['opc', 'oli']	['ast', 'opc', 'oli']
2798	PLPPR1	incomplete-splice_match	0	0	0.181818	0	0.272727	0.545455	0	0	0.0714286	0.0714286	0.214286	0	0.285714	0.357143	0	0	['inh', 'opc', 'oli']	['ast', 'ex', 'inh', 'opc', 'oli']
2799	PLPPR1	incomplete-splice_match	0	0	0	0	0	1	0	0	0	0.0454545	0.0454545	0	0	0.909091	0	0	['oli']	['oli']
2805	DLG5-AS1	novel_not_in_catalog	0.0909091	0.636364	0	0	0.181818	0.0909091	0	0	0.1	0.2	0	0.1	0.2	0.4	0	0	['ast', 'ex', 'opc', 'oli']	['ast', 'ex', 'mic', 'opc', 'oli']
2809	CDKN1C	full-splice_match	0.0139665	0.0167598	0.00837989	0.0139665	0.0167598	0.927374	0.0027933	0	0.0153509	0.0175439	0.00219298	0.00438596	0.00657895	0.953947	0	0	['oli']	['oli']
2810	CDKN1C	full-splice_match	0.00970874	0.0679612	0.0291262	0.0194175	0.0291262	0.815534	0	0.0291262	0.00925926	0.00925926	0.0277778	0	0.0277778	0.925926	0	0	['ex', 'oli']	['oli']
2811	CDKN1C	full-splice_match	0.03	0.05	0.04	0.03	0	0.85	0	0	0	0	0	0	0	1	0	0	['ex', 'oli']	['oli']
2815	PHLDA2	full-splice_match	0.0322581	0.709677	0.16129	0.0322581	0	0.0645161	0	0	0	0.807692	0.0769231	0	0	0.115385	0	0	['ex', 'inh', 'oli']	['ex', 'inh', 'oli']
2821	NAP1L4	incomplete-splice_match	0	0.0930233	0.0697674	0.0465116	0	0.767442	0	0.0232558	0.0714286	0.142857	0.107143	0	0.142857	0.5	0	0.0357143	['ex', 'inh', 'oli']	['ast', 'ex', 'inh', 'opc', 'oli']
2825	NAP1L4	incomplete-splice_match	0	0.12963	0.0555556	0.037037	0.037037	0.722222	0	0.0185185	0.0652174	0.0434783	0.152174	0.0434783	0.0434783	0.652174	0	0	['ex', 'inh', 'oli']	['ast', 'inh', 'oli']
2827	NAP1L4	incomplete-splice_match	0.25	0	0	0	0	0.75	0	0	0	0.142857	0.142857	0	0	0.714286	0	0	['ast', 'oli']	['ex', 'inh', 'oli']
2830	CARS1	incomplete-splice_match	0.1	0.65	0.15	0	0	0.1	0	0	0	0.1875	0.0625	0	0	0.6875	0.0625	0	['ast', 'ex', 'inh', 'oli']	['ex', 'inh', 'oli', 'per']
2834	CARS1	incomplete-splice_match	0	0.4	0	0	0	0.6	0	0	0	0.5	0	0	0	0.5	0	0	['ex', 'oli']	['ex', 'oli']
2835	CARS1	incomplete-splice_match	0	0.384615	0.0769231	0	0.0769231	0.461538	0	0	0.025	0.525	0.225	0.025	0.025	0.175	0	0	['ex', 'inh', 'opc', 'oli']	['ex', 'inh', 'oli']
2837	CARS1	full-splice_match	0.0952381	0.238095	0.0952381	0.047619	0	0.52381	0	0	0.0666667	0.266667	0	0.0666667	0	0.533333	0.0666667	0	['ast', 'ex', 'inh', 'oli']	['ast', 'ex', 'mic', 'oli', 'per']
2848	RASSF7	incomplete-splice_match	0	0.521739	0.217391	0.0434783	0	0.217391	0	0	0	0	0.25	0.25	0	0.5	0	0	['ex', 'inh', 'oli']	['inh', 'mic', 'oli']
2850	PHRF1	incomplete-splice_match	0.117647	0.352941	0.117647	0	0.0588235	0.352941	0	0	0.125	0.21875	0.125	0.03125	0	0.5	0	0	['ast', 'ex', 'inh', 'opc', 'oli']	['ast', 'ex', 'inh', 'oli']
2859	RNH1	full-splice_match	0	0	0.2	0	0	0.8	0	0	0	0.214286	0.0714286	0	0.0714286	0.642857	0	0	['inh', 'oli']	['ex', 'inh', 'opc', 'oli']
2861	RNH1	novel_in_catalog	0	0	0	0	0	1	0	0	0	0.0196078	0.0588235	0	0.0392157	0.882353	0	0	['oli']	['inh', 'oli']
2864	RNH1	full-splice_match	0.0555556	0.0555556	0.0555556	0	0.0555556	0.777778	0	0	0	0.111111	0	0.111111	0	0.666667	0	0.111111	['ast', 'ex', 'inh', 'opc', 'oli']	['ex', 'end', 'mic', 'oli']
2872	RNH1	full-splice_match	0.00598802	0.0538922	0.0239521	0	0	0.91018	0	0.00598802	0.0740741	0.37037	0.037037	0	0.0185185	0.5	0	0	['ex', 'oli']	['ast', 'ex', 'oli']
2873	RNH1	full-splice_match	0.0394737	0.473684	0.105263	0.0263158	0.0131579	0.315789	0	0.0263158	0	0.111111	0	0	0	0.888889	0	0	['ex', 'inh', 'oli']	['ex', 'oli']
2875	HRAS	full-splice_match	0.0295858	0.491124	0.112426	0.0118343	0.00591716	0.349112	0	0	0.05	0.322727	0.218182	0.0227273	0.0272727	0.359091	0	0	['ex', 'inh', 'oli']	['ast', 'ex', 'inh', 'oli']
2881	HRAS	full-splice_match	0.0625	0.1875	0	0.0625	0	0.6875	0	0	0	0.2	0.1	0	0.1	0.6	0	0	['ast', 'ex', 'mic', 'oli']	['ex', 'inh', 'opc', 'oli']
2885	HRAS	full-splice_match	0.0454545	0.681818	0.136364	0	0	0.0909091	0	0.0454545	0	0.5	0.25	0	0.0833333	0.166667	0	0	['ex', 'inh', 'oli']	['ex', 'inh', 'opc', 'oli']
2886	HRAS	full-splice_match	0	0.357143	0.5	0	0	0.0714286	0	0.0714286	0	0.4	0.4	0	0	0.2	0	0	['ex', 'end', 'inh', 'oli']	['ex', 'inh', 'oli']
2893	DEAF1	full-splice_match	0.083871	0.512903	0.164516	0.016129	0.0387097	0.174194	0	0.00967742	0.0229885	0.528736	0.224138	0.0114943	0.0287356	0.178161	0.00574713	0	['ast', 'ex', 'inh', 'oli']	['ex', 'inh', 'oli']
2894	CCDC92	full-splice_match	0	0.4	0.3	0	0	0.3	0	0	0.0327869	0.655738	0.180328	0	0	0.131148	0	0	['ex', 'inh', 'oli']	['ex', 'inh', 'oli']
2895	CCDC92	full-splice_match	0.0259434	0.636792	0.176887	0.00235849	0.00707547	0.146226	0.00235849	0.00235849	0.025	0.225	0.25	0	0	0.5	0	0	['ex', 'inh', 'oli']	['ex', 'inh', 'oli']
2900	TUBGCP3	incomplete-splice_match	0.0804598	0.137931	0.137931	0.0229885	0	0.609195	0	0.0114943	0	0.181818	0.363636	0	0.181818	0.272727	0	0	['ast', 'ex', 'inh', 'oli']	['ex', 'inh', 'opc', 'oli']
2902	ENSG00000282241	full-splice_match	0	1	0	0	0	0	0	0	0	0.833333	0	0	0	0	0.166667	0	['ex']	['ex', 'per']
2906	TMEM179	full-splice_match	0.00990099	0.587459	0.260726	0.00330033	0.0264026	0.112211	0	0	0.00625	0.521875	0.3	0	0.0375	0.134375	0	0	['ex', 'inh', 'oli']	['ex', 'inh', 'oli']
2911	CHGA	incomplete-splice_match	0	1	0	0	0	0	0	0	0	0.75	0.25	0	0	0	0	0	['ex']	['ex', 'inh']
2912	CHGA	incomplete-splice_match	0	1	0	0	0	0	0	0	0	0.857143	0.142857	0	0	0	0	0	['ex']	['ex', 'inh']
2914	CHGA	incomplete-splice_match	0.04	0.72	0.16	0.04	0	0.04	0	0	0	0.666667	0.333333	0	0	0	0	0	['ex', 'inh']	['ex', 'inh']
2923	CHGA	incomplete-splice_match	0	0.75	0	0	0	0.25	0	0	0	0.555556	0.333333	0	0	0.111111	0	0	['ex', 'oli']	['ex', 'inh', 'oli']
2924	CHGA	full-splice_match	0.0182371	0.759878	0.176292	0.00303951	0.00303951	0.0395137	0	0	0.00854701	0.7151	0.219373	0.00569801	0.00854701	0.042735	0	0	['ex', 'inh']	['ex', 'inh']
2927	LYSET	full-splice_match	0.0806452	0.169355	0.112903	0.0322581	0.0483871	0.548387	0	0.00806452	0.0769231	0.161538	0.130769	0.0538462	0.0384615	0.538462	0	0	['ast', 'ex', 'inh', 'oli']	['ast', 'ex', 'inh', 'mic', 'oli']
2929	LYSET	full-splice_match	0.333333	0	0	0	0	0.666667	0	0	0	0.2	0	0	0	0.8	0	0	['ast', 'oli']	['ex', 'oli']
2932	UNC79	incomplete-splice_match	0	1	0	0	0	0	0	0	0	0.2	0.4	0	0	0.4	0	0	['ex']	['ex', 'inh', 'oli']
2937	UBR7	full-splice_match	0	0	0	0	0.333333	0.666667	0	0	0	0	0	0.25	0	0.75	0	0	['opc', 'oli']	['mic', 'oli']
2950	ENSG00000281396	full-splice_match	0	0	0	0.222222	0	0.777778	0	0	0.333333	0	0.333333	0	0	0.333333	0	0	['mic', 'oli']	['ast', 'inh', 'oli']
2953	ITPK1	incomplete-splice_match	0	0.125	0.125	0.125	0.125	0.5	0	0	0	0.111111	0	0.111111	0.111111	0.666667	0	0	['ex', 'inh', 'mic', 'opc', 'oli']	['ex', 'mic', 'opc', 'oli']
2955	MOAP1	full-splice_match	0.0656934	0.437956	0.255474	0.0145985	0	0.226277	0	0	0.0209205	0.535565	0.297071	0.0041841	0.0041841	0.138075	0	0	['ast', 'ex', 'inh', 'oli']	['ex', 'inh', 'oli']
2956	GON7	full-splice_match	0.0512821	0.384615	0.153846	0.0769231	0	0.333333	0	0	0.130435	0.217391	0.304348	0	0.0434783	0.304348	0	0	['ast', 'ex', 'inh', 'mic', 'oli']	['ast', 'ex', 'inh', 'oli']
2960	BTBD7	incomplete-splice_match	0.0882353	0.176471	0.147059	0	0.0588235	0.470588	0.0294118	0.0294118	0.2	0.166667	0.0666667	0.0666667	0.1	0.4	0	0	['ast', 'ex', 'inh', 'opc', 'oli']	['ast', 'ex', 'inh', 'mic', 'opc', 'oli']
2965	PRIMA1	novel_not_in_catalog	0.1	0	0	0	0	0.9	0	0	0	0	0	0	0	1	0	0	['ast', 'oli']	['oli']
2972	DDX24	incomplete-splice_match	0.0128205	0.739316	0.207265	0.00854701	0.0042735	0.0235043	0.00213675	0.00213675	0.0318725	0.314741	0.282869	0.00796813	0.0119522	0.346614	0	0.00398406	['ex', 'inh']	['ex', 'inh', 'oli']
2974	DDX24	incomplete-splice_match	0	0.5	0.5	0	0	0	0	0	0	0.25	0.5	0	0	0.25	0	0	['ex', 'inh']	['ex', 'inh', 'oli']
2976	DDX24	incomplete-splice_match	0	0.647059	0.117647	0	0	0.235294	0	0	0	0	0.125	0	0	0.875	0	0	['ex', 'inh', 'oli']	['inh', 'oli']
2978	DDX24	incomplete-splice_match	0.08125	0.1125	0.25625	0.025	0.0625	0.4625	0	0	0.0434783	0.217391	0.217391	0	0.0434783	0.478261	0	0	['ast', 'ex', 'inh', 'opc', 'oli']	['ex', 'inh', 'oli']
2979	DDX24	incomplete-splice_match	0	0.375	0	0	0	0.625	0	0	0.0952381	0.142857	0.238095	0	0	0.52381	0	0	['ex', 'oli']	['ast', 'ex', 'inh', 'oli']
2981	DDX24	full-splice_match	0.0679468	0.355982	0.11226	0.0162482	0.0251108	0.416544	0	0.00590842	0.0459259	0.340741	0.198519	0.0133333	0.0355556	0.36	0.00148148	0.00444444	['ast', 'ex', 'inh', 'oli']	['ex', 'inh', 'oli']
2986	IFI27L1	novel_in_catalog	0.4	0.2	0	0	0	0.4	0	0	0.333333	0	0	0	0	0.666667	0	0	['ast', 'ex', 'oli']	['ast', 'oli']
2992	IFI27	novel_in_catalog	0.0833333	0.0277778	0.0833333	0.0555556	0.0277778	0.222222	0	0.5	0.0909091	0.272727	0	0	0	0.0909091	0.0909091	0.454545	['ast', 'end', 'inh', 'mic', 'oli']	['ast', 'ex', 'end', 'oli', 'per']
2993	IFI27	full-splice_match	0.272727	0.0909091	0.0454545	0.0454545	0	0.0454545	0	0.5	0	0.2	0	0	0	0	0	0.8	['ast', 'ex', 'end']	['ex', 'end']
2994	IFI27	full-splice_match	0	0.153846	0	0	0	0.0769231	0	0.769231	0	0	0	0	0	0.4	0	0.6	['ex', 'end', 'oli']	['end', 'oli']
2996	IFI27L1	full-splice_match	0.259259	0.259259	0.148148	0.0740741	0	0.259259	0	0	0.212121	0.242424	0.181818	0	0.0606061	0.30303	0	0	['ast', 'ex', 'inh', 'mic', 'oli']	['ast', 'ex', 'inh', 'opc', 'oli']
3002	IFI27L2	full-splice_match	0.0762332	0.0470852	0.0381166	0.0246637	0.0336323	0.773543	0	0.00672646	0.0689103	0.0448718	0.0657051	0.0272436	0.036859	0.753205	0	0.00320513	['ast', 'oli']	['ast', 'inh', 'oli']
3003	IFI27L2	novel_in_catalog	0.227273	0.272727	0.181818	0.0454545	0	0.272727	0	0	0.157895	0.210526	0.0526316	0	0.105263	0.473684	0	0	['ast', 'ex', 'inh', 'oli']	['ast', 'ex', 'inh', 'opc', 'oli']
3009	IFI27L2	full-splice_match	0.210526	0.263158	0.0877193	0.0175439	0.0526316	0.368421	0	0	0.444444	0.0185185	0.0555556	0	0.0185185	0.462963	0	0	['ast', 'ex', 'inh', 'opc', 'oli']	['ast', 'inh', 'oli']
3015	PPP4R4	incomplete-splice_match	0.166667	0.833333	0	0	0	0	0	0	0	0.5	0.5	0	0	0	0	0	['ast', 'ex']	['ex', 'inh']
3018	SERPINA1	incomplete-splice_match	0	0	0.142857	0.857143	0	0	0	0	0	0.0526316	0	0.894737	0	0.0526316	0	0	['inh', 'mic']	['ex', 'mic', 'oli']
3029	B2M	full-splice_match	0.0552209	0.00702811	0.0240964	0.0853414	0.0903614	0.71988	0.00100402	0.0170683	0.0205339	0.0451745	0.110883	0.0944559	0.0903491	0.622177	0.00205339	0.0143737	['ast', 'mic', 'opc', 'oli']	['inh', 'mic', 'opc', 'oli']
3030	B2M	incomplete-splice_match	0.0434783	0.0652174	0.0362319	0.144928	0.0507246	0.572464	0.0144928	0.0724638	0.0291971	0.0145985	0.0145985	0.145985	0.0583942	0.722628	0	0.0145985	['ex', 'end', 'mic', 'opc', 'oli']	['mic', 'opc', 'oli']
3036	TRIM69	full-splice_match	0.0833333	0.25	0.0416667	0.0416667	0.0416667	0.5	0	0.0416667	0	0	0.190476	0	0.047619	0.761905	0	0	['ast', 'ex', 'oli']	['inh', 'oli']
3039	ADAMTS7P1	incomplete-splice_match	0.0357143	0.857143	0.107143	0	0	0	0	0	0	0.777778	0.166667	0	0	0.0555556	0	0	['ex', 'inh']	['ex', 'inh', 'oli']
3041	UBE2Q2P2	novel_not_in_catalog	0.24	0.64	0.04	0	0.08	0	0	0	0.133333	0.666667	0.0666667	0	0.133333	0	0	0	['ast', 'ex', 'opc']	['ast', 'ex', 'inh', 'opc']
3050	ENSG00000273673	full-splice_match	0.0602941	0.141176	0.0485294	0.0529412	0.0235294	0.664706	0	0.00882353	0.0391363	0.179487	0.0944669	0.0620783	0.0337382	0.574899	0.00269906	0.0134953	['ast', 'ex', 'mic', 'oli']	['ex', 'inh', 'mic', 'oli']
3051	RPS17	full-splice_match	0.0525687	0.174432	0.0669056	0.041816	0.0358423	0.609319	0.00358423	0.0155317	0.0486188	0.18895	0.0950276	0.0541436	0.0342541	0.571271	0	0.00773481	['ast', 'ex', 'inh', 'oli']	['ex', 'inh', 'mic', 'oli']
3055	CPEB1	incomplete-splice_match	0	0.4	0.142857	0	0.0285714	0.428571	0	0	0	0.233333	0.133333	0	0	0.633333	0	0	['ex', 'inh', 'oli']	['ex', 'inh', 'oli']
3059	RPS17	full-splice_match	0	0.387097	0.0645161	0.0322581	0.0322581	0.483871	0	0	0	0.228571	0.0857143	0	0.0857143	0.542857	0	0.0571429	['ex', 'inh', 'oli']	['ex', 'end', 'inh', 'opc', 'oli']
3063	RPS17	full-splice_match	0.0833333	0.166667	0.25	0.0833333	0	0.25	0.0833333	0.0833333	0	0	0.4	0	0	0.6	0	0	['ast', 'ex', 'end', 'inh', 'mic', 'oli', 'per']	['inh', 'oli']
3065	HERC2P2	novel_not_in_catalog	0.25	0.333333	0.25	0.0833333	0	0.0833333	0	0	0.0833333	0.333333	0.416667	0	0.0833333	0.0833333	0	0	['ast', 'ex', 'inh', 'mic', 'oli']	['ast', 'ex', 'inh', 'opc', 'oli']
3068	HERC2P2	novel_not_in_catalog	0.454545	0	0.0909091	0	0	0.454545	0	0	0.333333	0.111111	0	0	0.111111	0.444444	0	0	['ast', 'inh', 'oli']	['ast', 'ex', 'opc', 'oli']
3069	ENSG00000274240	full-splice_match	0	0.625	0	0.125	0	0.25	0	0	0	0.25	0.5	0	0	0.25	0	0	['ex', 'mic', 'oli']	['ex', 'inh', 'oli']
3076	BFAR	incomplete-splice_match	0.0714286	0.214286	0	0.0714286	0.0714286	0.571429	0	0	0.125	0.4375	0.1875	0	0	0.25	0	0	['ast', 'ex', 'mic', 'opc', 'oli']	['ast', 'ex', 'inh', 'oli']
3081	NOMO3	incomplete-splice_match	0	0.791667	0.0416667	0	0	0.166667	0	0	0.138889	0.305556	0.277778	0	0.0277778	0.25	0	0	['ex', 'oli']	['ast', 'ex', 'inh', 'oli']
3084	NOMO3	full-splice_match	0	0.5	0.318182	0.0454545	0	0.136364	0	0	0	0.611111	0.166667	0.0555556	0	0.166667	0	0	['ex', 'inh', 'oli']	['ex', 'inh', 'mic', 'oli']
3089	NPIPA9	full-splice_match	0.135135	0.459459	0.117117	0.018018	0.027027	0.243243	0	0	0.076087	0.565217	0.206522	0.0108696	0.0217391	0.119565	0	0	['ast', 'ex', 'inh', 'oli']	['ast', 'ex', 'inh', 'oli']
3094	ENSG00000290515	incomplete-splice_match	0.5	0	0	0	0	0.5	0	0	0	0.5	0.0714286	0	0	0.428571	0	0	['ast', 'oli']	['ex', 'inh', 'oli']
3098	RRN3	incomplete-splice_match	0	0.4	0.2	0	0.0666667	0.333333	0	0	0.1	0.2	0.3	0	0.1	0.3	0	0	['ex', 'inh', 'opc', 'oli']	['ast', 'ex', 'inh', 'opc', 'oli']
3100	RRN3	full-splice_match	0.2	0	0	0	0	0.8	0	0	0	0	0	0	0	1	0	0	['ast', 'oli']	['oli']
3103	NTAN1	full-splice_match	0.0625	0.34375	0.21875	0.078125	0.015625	0.25	0	0.03125	0.0526316	0.473684	0.184211	0	0.0263158	0.263158	0	0	['ast', 'ex', 'inh', 'mic', 'oli']	['ast', 'ex', 'inh', 'oli']
3105	NTAN1	full-splice_match	0.142857	0.142857	0	0	0	0.714286	0	0	0	0.565217	0.304348	0	0.0434783	0.0869565	0	0	['ast', 'ex', 'oli']	['ex', 'inh', 'oli']
3108	ENSG00000282717	full-splice_match	0	0.583333	0.25	0	0.0416667	0.125	0	0	0.111111	0.333333	0.111111	0	0	0.444444	0	0	['ex', 'inh', 'oli']	['ast', 'ex', 'inh', 'oli']
3114	ENSG00000276709	incomplete-splice_match	0.0754717	0.509434	0.0943396	0.0188679	0	0.301887	0	0	0.0344828	0.413793	0.12069	0.0172414	0.137931	0.258621	0	0.0172414	['ast', 'ex', 'inh', 'oli']	['ex', 'inh', 'opc', 'oli']
3125	NOMO3	genic	0.0625	0.125	0.125	0.0625	0	0.625	0	0	0.0625	0.28125	0.1875	0	0.09375	0.375	0	0	['ast', 'ex', 'inh', 'mic', 'oli']	['ast', 'ex', 'inh', 'opc', 'oli']
3127	MPV17L	full-splice_match	0	0.444444	0	0	0.111111	0.444444	0	0	0	0.583333	0.166667	0	0	0.25	0	0	['ex', 'opc', 'oli']	['ex', 'inh', 'oli']
3129	MPV17L	full-splice_match	0.125	0	0.25	0	0.125	0.5	0	0	0	0.2	0.2	0	0	0.6	0	0	['ast', 'inh', 'opc', 'oli']	['ex', 'inh', 'oli']
3133	BMERB1	incomplete-splice_match	0.0101523	0.604061	0.162437	0.00507614	0.0406091	0.177665	0	0	0.0292683	0.395122	0.307317	0	0.0780488	0.190244	0	0	['ex', 'inh', 'oli']	['ex', 'inh', 'opc', 'oli']
3134	BMERB1	full-splice_match	0	0.241379	0.241379	0	0.206897	0.310345	0	0	0.0517241	0.206897	0.344828	0	0.103448	0.293103	0	0	['ex', 'inh', 'opc', 'oli']	['ast', 'ex', 'inh', 'opc', 'oli']
3135	ENSG00000282074	incomplete-splice_match	0.0434783	0.652174	0.0869565	0	0.0434783	0.173913	0	0	0	0.352941	0.117647	0	0.176471	0.352941	0	0	['ex', 'inh', 'oli']	['ex', 'inh', 'opc', 'oli']
3136	BMERB1	incomplete-splice_match	0.0769231	0.461538	0.230769	0	0	0.230769	0	0	0.142857	0.142857	0.428571	0	0	0.285714	0	0	['ast', 'ex', 'inh', 'oli']	['ast', 'ex', 'inh', 'oli']
3137	BMERB1	full-splice_match	0	0.444444	0.166667	0	0.166667	0.222222	0	0	0.0769231	0.307692	0.230769	0	0.0769231	0.307692	0	0	['ex', 'inh', 'opc', 'oli']	['ast', 'ex', 'inh', 'opc', 'oli']
3141	NDE1	incomplete-splice_match	0	0	0.0769231	0	0	0.923077	0	0	0	0	0	0	0	1	0	0	['inh', 'oli']	['oli']
3142	NDE1	incomplete-splice_match	0	0	0	0.1	0	0.9	0	0	0	0	0	0	0	1	0	0	['mic', 'oli']	['oli']
3144	NDE1	incomplete-splice_match	0	0.047619	0	0	0	0.952381	0	0	0	0	0.125	0	0.125	0.75	0	0	['oli']	['inh', 'opc', 'oli']
3148	ENSG00000282638	full-splice_match	0	0	0.047619	0.047619	0.047619	0.857143	0	0	0	0	0	0	0	1	0	0	['oli']	['oli']
3149	ENSG00000282287	full-splice_match	0	0	0	0	0	1	0	0	0	0.0322581	0	0.0322581	0.0322581	0.903226	0	0	['oli']	['oli']
3152	PARN	incomplete-splice_match	0	0	0	0	0	1	0	0	0.25	0.25	0.25	0	0	0.25	0	0	['oli']	['ast', 'ex', 'inh', 'oli']
3166	PDXDC1	incomplete-splice_match	0.109091	0.472727	0.109091	0.0363636	0	0.236364	0	0.0363636	0.0545455	0.345455	0.2	0.0181818	0.0545455	0.327273	0	0	['ast', 'ex', 'inh', 'oli']	['ast', 'ex', 'inh', 'opc', 'oli']
3173	NPIPA1	incomplete-splice_match	0.04	0.16	0	0	0.04	0.76	0	0	0	1	0	0	0	0	0	0	['ex', 'oli']	['ex']
3185	NOMO1	incomplete-splice_match	0.0344828	0.62069	0.206897	0	0.0344828	0.0689655	0	0.0344828	0	0.619048	0.0952381	0	0	0.285714	0	0	['ex', 'inh', 'oli']	['ex', 'inh', 'oli']
3186	NOMO1	incomplete-splice_match	0.0677966	0.0508475	0.0847458	0.0169492	0.0508475	0.728814	0	0	0.0212766	0.382979	0.276596	0.0212766	0	0.297872	0	0	['ast', 'ex', 'inh', 'opc', 'oli']	['ex', 'inh', 'oli']
3201	MARF1	full-splice_match	0.2	0.8	0	0	0	0	0	0	0	0	1	0	0	0	0	0	['ast', 'ex']	['inh']
3206	MARF1	incomplete-splice_match	0	0.25	0.0625	0.0625	0.125	0.5	0	0	0	0.166667	0.166667	0	0	0.666667	0	0	['ex', 'inh', 'mic', 'opc', 'oli']	['ex', 'inh', 'oli']
3207	MARF1	incomplete-splice_match	0.111111	0.222222	0.111111	0	0	0.555556	0	0	0.0833333	0.416667	0.0833333	0	0	0.416667	0	0	['ast', 'ex', 'inh', 'oli']	['ast', 'ex', 'inh', 'oli']
3209	CEP20	full-splice_match	0	0.214286	0.285714	0	0	0.5	0	0	0.0895522	0.104478	0.104478	0.0298507	0.0149254	0.641791	0	0.0149254	['ex', 'inh', 'oli']	['ast', 'ex', 'inh', 'oli']
3210	CEP20	novel_in_catalog	0	0.3	0.2	0	0	0.5	0	0	0	0.3	0.1	0	0.1	0.5	0	0	['ex', 'inh', 'oli']	['ex', 'inh', 'opc', 'oli']
3221	CEP20	incomplete-splice_match	0.111111	0.111111	0	0	0	0.777778	0	0	0.3	0.1	0.1	0	0	0.5	0	0	['ast', 'ex', 'oli']	['ast', 'ex', 'inh', 'oli']
3223	DECR2	incomplete-splice_match	0.195122	0.414634	0.170732	0.0487805	0.0731707	0.097561	0	0	0	0.55	0.2	0	0	0.2	0.05	0	['ast', 'ex', 'inh', 'opc', 'oli']	['ex', 'inh', 'oli', 'per']
3234	PAM16	full-splice_match	0.0682927	0.239024	0.0780488	0.0243902	0.0243902	0.565854	0	0	0.0300429	0.236052	0.175966	0.00858369	0.0300429	0.515021	0.00429185	0	['ast', 'ex', 'inh', 'oli']	['ex', 'inh', 'oli']
3235	PAM16	full-splice_match	0.0666667	0.266667	0.216667	0.0166667	0.0166667	0.416667	0	0	0	0.341463	0.195122	0	0	0.463415	0	0	['ast', 'ex', 'inh', 'oli']	['ex', 'inh', 'oli']
3236	PAM16	novel_in_catalog	0	0.75	0.125	0	0.0625	0.0625	0	0	0	0.666667	0	0	0	0.333333	0	0	['ex', 'inh', 'opc', 'oli']	['ex', 'oli']
3238	PAM16	full-splice_match	0.0416667	0.166667	0.125	0.0833333	0.0416667	0.541667	0	0	0	0.6	0	0	0	0.4	0	0	['ex', 'inh', 'mic', 'oli']	['ex', 'oli']
3245	ENSG00000282011	full-splice_match	0.047619	0.333333	0.0952381	0.0952381	0.047619	0.380952	0	0	0	0.243243	0.162162	0.0540541	0.027027	0.486486	0.027027	0	['ex', 'inh', 'mic', 'oli']	['ex', 'inh', 'mic', 'oli']
3253	DNAJA3	full-splice_match	0.0943396	0.169811	0.0754717	0.0754717	0.0566038	0.528302	0	0	0.0625	0.354167	0.104167	0	0.0416667	0.4375	0	0	['ast', 'ex', 'inh', 'mic', 'opc', 'oli']	['ast', 'ex', 'inh', 'oli']
3256	DNAJA3	incomplete-splice_match	0.2	0.4	0.1	0	0	0.3	0	0	0.4	0.4	0.2	0	0	0	0	0	['ast', 'ex', 'inh', 'oli']	['ast', 'ex', 'inh']
3265	HMOX2	incomplete-splice_match	0.0645161	0.258065	0.0967742	0	0.0322581	0.516129	0	0.0322581	0	0.047619	0.238095	0	0	0.714286	0	0	['ast', 'ex', 'inh', 'oli']	['inh', 'oli']
3271	HMOX2	full-splice_match	0.0327869	0.135246	0.057377	0.00409836	0.00819672	0.762295	0	0	0.0451128	0.195489	0.0789474	0	0.0075188	0.672932	0	0	['ex', 'inh', 'oli']	['ex', 'inh', 'oli']
3275	HMOX2	incomplete-splice_match	0.0232558	0.697674	0.139535	0	0	0.139535	0	0	0	0.333333	0.133333	0.0666667	0	0.466667	0	0	['ex', 'inh', 'oli']	['ex', 'inh', 'mic', 'oli']
3276	HMOX2	incomplete-splice_match	0.142857	0.285714	0	0	0	0.571429	0	0	0	0.333333	0	0	0	0.666667	0	0	['ast', 'ex', 'oli']	['ex', 'oli']
3303	NMRAL1	full-splice_match	0	0	0	0	0	1	0	0	0.0727273	0.218182	0.163636	0.0181818	0.0363636	0.490909	0	0	['oli']	['ast', 'ex', 'inh', 'oli']
3306	CDIP1	incomplete-splice_match	0.0795455	0.147727	0.227273	0	0.0681818	0.477273	0	0	0	0.316667	0.483333	0	0.05	0.15	0	0	['ast', 'ex', 'inh', 'opc', 'oli']	['ex', 'inh', 'opc', 'oli']
3311	TAF15	full-splice_match	0.04	0.44	0.2	0.08	0	0.24	0	0	0.0833333	0.305556	0.277778	0.0277778	0.0555556	0.25	0	0	['ex', 'inh', 'mic', 'oli']	['ast', 'ex', 'inh', 'opc', 'oli']
3315	TAF15	incomplete-splice_match	0	0.7	0.2	0	0	0.1	0	0	0	0.210526	0.263158	0	0	0.526316	0	0	['ex', 'inh', 'oli']	['ex', 'inh', 'oli']
3317	TAF15	full-splice_match	0.0520833	0.479167	0.145833	0	0.0104167	0.302083	0	0.0104167	0.0909091	0.0909091	0.0909091	0.0454545	0	0.636364	0.0227273	0.0227273	['ast', 'ex', 'inh', 'oli']	['ast', 'ex', 'inh', 'oli']
3319	TAF15	incomplete-splice_match	0.166667	0.333333	0.166667	0	0.166667	0.166667	0	0	0	0.142857	0.142857	0.142857	0	0.571429	0	0	['ast', 'ex', 'inh', 'opc', 'oli']	['ex', 'inh', 'mic', 'oli']
3320	ENSG00000282498	full-splice_match	0.142857	0.571429	0.285714	0	0	0	0	0	0	0.666667	0.222222	0	0	0.111111	0	0	['ast', 'ex', 'inh']	['ex', 'inh', 'oli']
3325	TAF15	full-splice_match	0.368421	0	0.263158	0.105263	0	0.263158	0	0	0.0416667	0.125	0.0833333	0.208333	0.0416667	0.458333	0	0.0416667	['ast', 'inh', 'mic', 'oli']	['ex', 'inh', 'mic', 'oli']
3329	ZNHIT3	full-splice_match	0.0376344	0.290323	0.134409	0.0107527	0.0215054	0.5	0	0.00537634	0.0382979	0.293617	0.217021	0.012766	0.0255319	0.404255	0	0.00851064	['ex', 'inh', 'oli']	['ex', 'inh', 'oli']
3330	ZNHIT3	full-splice_match	0.0192308	0.384615	0.0384615	0.0192308	0	0.538462	0	0	0.02	0.26	0.28	0	0.04	0.38	0.02	0	['ex', 'oli']	['ex', 'inh', 'oli']
3332	ZNHIT3	full-splice_match	0	0	0	0	0	1	0	0	0	0.25	0.25	0	0	0.5	0	0	['oli']	['ex', 'inh', 'oli']
3333	ZNHIT3	incomplete-splice_match	0.0416667	0.375	0.125	0	0.0833333	0.375	0	0	0.0588235	0.294118	0.117647	0.0588235	0.0588235	0.411765	0	0	['ex', 'inh', 'opc', 'oli']	['ast', 'ex', 'inh', 'mic', 'opc', 'oli']
3343	GGNBP2	incomplete-splice_match	0.047619	0.380952	0.047619	0.047619	0.047619	0.380952	0	0.047619	0.142857	0.142857	0.285714	0.0714286	0	0.357143	0	0	['ex', 'oli']	['ast', 'ex', 'inh', 'mic', 'oli']
3345	GGNBP2	incomplete-splice_match	0.285714	0	0	0	0	0.714286	0	0	0	0	0.4	0	0	0.6	0	0	['ast', 'oli']	['inh', 'oli']
3349	GGNBP2	full-splice_match	0.2	0.3	0.1	0.1	0	0.3	0	0	0.181818	0.409091	0.181818	0.0454545	0.0454545	0.136364	0	0	['ast', 'ex', 'inh', 'mic', 'oli']	['ast', 'ex', 'inh', 'oli']
3365	DHRS11	full-splice_match	0.09375	0.5	0.3125	0	0.03125	0.0625	0	0	0.0294118	0.705882	0.235294	0	0	0.0294118	0	0	['ast', 'ex', 'inh', 'oli']	['ex', 'inh']
3368	ENSG00000282570	full-splice_match	0	0.818182	0.181818	0	0	0	0	0	0.0869565	0.652174	0	0	0	0.26087	0	0	['ex', 'inh']	['ast', 'ex', 'oli']
3377	AATF	full-splice_match	0.285714	0.285714	0	0.0714286	0	0.357143	0	0	0	0.142857	0	0.142857	0	0.714286	0	0	['ast', 'ex', 'mic', 'oli']	['ex', 'mic', 'oli']
3378	TAF15	incomplete-splice_match	0	0.555556	0	0	0	0.444444	0	0	0.375	0.125	0	0.125	0	0.375	0	0	['ex', 'oli']	['ast', 'ex', 'mic', 'oli']
3386	TAF15	incomplete-splice_match	0.125	0.5	0.125	0.125	0	0.125	0	0	0.125	0	0.25	0.125	0	0.5	0	0	['ast', 'ex', 'inh', 'mic', 'oli']	['ast', 'inh', 'mic', 'oli']
3390	DUSP14	full-splice_match	0.037037	0.666667	0.0740741	0	0	0.222222	0	0	0.0238095	0.833333	0.0714286	0	0	0.0714286	0	0	['ex', 'inh', 'oli']	['ex', 'inh', 'oli']
3392	MRPL45	incomplete-splice_match	0.0892857	0.267857	0.0892857	0	0	0.553571	0	0	0.0754717	0.150943	0.113208	0.0188679	0.0188679	0.603774	0	0.0188679	['ast', 'ex', 'inh', 'oli']	['ast', 'ex', 'inh', 'oli']
3393	MRPL45	full-splice_match	0.0533333	0.16	0.106667	0	0.0533333	0.626667	0	0	0.0634921	0.206349	0.111111	0.047619	0.031746	0.539683	0	0	['ast', 'ex', 'inh', 'opc', 'oli']	['ast', 'ex', 'inh', 'oli']
3394	MRPL45	incomplete-splice_match	0.0588235	0.205882	0.147059	0	0	0.588235	0	0	0.037037	0.111111	0.037037	0	0.111111	0.703704	0	0	['ast', 'ex', 'inh', 'oli']	['ex', 'opc', 'oli']
3407	ENSG00000282494	full-splice_match	0.181818	0.181818	0.151515	0.030303	0	0.454545	0	0	0.285714	0.285714	0.047619	0.047619	0.190476	0.142857	0	0	['ast', 'ex', 'inh', 'oli']	['ast', 'ex', 'opc', 'oli']
3410	MLLT6	full-splice_match	0.214286	0.190476	0.047619	0.111111	0.047619	0.380952	0.00793651	0	0.0843373	0.325301	0.0722892	0.0481928	0.0481928	0.409639	0	0.0120482	['ast', 'ex', 'mic', 'oli']	['ast', 'ex', 'inh', 'oli']
3414	CISD3	full-splice_match	0	0.25	0	0	0	0.75	0	0	0	0.5	0.25	0	0	0.25	0	0	['ex', 'oli']	['ex', 'inh', 'oli']
3416	CISD3	full-splice_match	0.0769231	0.25641	0.0641026	0.0384615	0.025641	0.525641	0	0.0128205	0.0375	0.2375	0.075	0.025	0.0375	0.575	0	0.0125	['ast', 'ex', 'inh', 'oli']	['ex', 'inh', 'oli']
3424	ENSG00000282749	full-splice_match	0	0.6	0.4	0	0	0	0	0	0	0.5	0.5	0	0	0	0	0	['ex', 'inh']	['ex', 'inh']
3428	PSMB3	full-splice_match	0.0207101	0.106509	0.0532544	0.0177515	0.0502959	0.745562	0	0.00591716	0.0232558	0.148256	0.107558	0.0261628	0.0581395	0.630814	0.00290698	0.00290698	['ex', 'inh', 'opc', 'oli']	['ex', 'inh', 'opc', 'oli']
3429	PSMB3	full-splice_match	0	0	0.5	0	0.5	0	0	0	0	0.125	0.125	0	0.125	0.5	0	0.125	['inh', 'opc']	['ex', 'end', 'inh', 'opc', 'oli']
3437	HMGB1P24	full-splice_match	0.222222	0.444444	0.111111	0	0.111111	0.111111	0	0	0	1	0	0	0	0	0	0	['ast', 'ex', 'inh', 'opc', 'oli']	['ex']
3453	MYO19	incomplete-splice_match	0	0.666667	0.333333	0	0	0	0	0	0.142857	0.285714	0.142857	0.142857	0	0.285714	0	0	['ex', 'inh']	['ast', 'ex', 'inh', 'mic', 'oli']
3459	SYNRG	incomplete-splice_match	0	0	0.333333	0	0	0.666667	0	0	0	0.5	0	0	0	0.5	0	0	['inh', 'oli']	['ex', 'oli']
3473	DDX52	incomplete-splice_match	0.2	0	0.2	0	0	0.6	0	0	0	0.230769	0	0	0.153846	0.615385	0	0	['ast', 'inh', 'oli']	['ex', 'opc', 'oli']
3474	DDX52	incomplete-splice_match	0.107143	0.285714	0.142857	0	0.0357143	0.428571	0	0	0.1	0.18	0.14	0.04	0.04	0.5	0	0	['ast', 'ex', 'inh', 'oli']	['ast', 'ex', 'inh', 'oli']
3479	NPEPPSP1	incomplete-splice_match	0.5	0	0	0	0	0.5	0	0	0.2	0.2	0.3	0	0	0.3	0	0	['ast', 'oli']	['ast', 'ex', 'inh', 'oli']
3480	NPEPPSP1	incomplete-splice_match	0.0857143	0.342857	0.114286	0.0285714	0.0285714	0.4	0	0	0.1875	0.25	0.125	0.03125	0.0625	0.34375	0	0	['ast', 'ex', 'inh', 'oli']	['ast', 'ex', 'inh', 'opc', 'oli']
3482	NPEPPSP1	incomplete-splice_match	0.17284	0.419753	0.0740741	0.0123457	0.0493827	0.271605	0	0	0.133333	0.416667	0.2	0	0.05	0.2	0	0	['ast', 'ex', 'inh', 'oli']	['ast', 'ex', 'inh', 'opc', 'oli']
3483	NPEPPSP1	novel_in_catalog	0.25	0.5	0.25	0	0	0	0	0	0.333333	0	0.333333	0	0.333333	0	0	0	['ast', 'ex', 'inh']	['ast', 'inh', 'opc']
3485	NPEPPSP1	incomplete-splice_match	0.166667	0.416667	0.333333	0	0	0.0833333	0	0	0.222222	0.666667	0.111111	0	0	0	0	0	['ast', 'ex', 'inh', 'oli']	['ast', 'ex', 'inh']
3496	EPOP	full-splice_match	0.0689655	0.655172	0.091954	0.0229885	0.0114943	0.137931	0	0.0114943	0	0.813333	0.0666667	0.0266667	0.0266667	0.0666667	0	0	['ast', 'ex', 'inh', 'oli']	['ex', 'inh', 'oli']
3498	PCGF2	incomplete-splice_match	0	0.684211	0.263158	0	0	0.0526316	0	0	0.125	0.3125	0.1875	0	0.1875	0.125	0	0.0625	['ex', 'inh', 'oli']	['ast', 'ex', 'end', 'inh', 'opc', 'oli']
3501	PIP4K2B	incomplete-splice_match	0	0	0	0	0	1	0	0	0	0	0	0	0	1	0	0	['oli']	['oli']
3507	CWC25	incomplete-splice_match	0.111111	0.444444	0.111111	0	0	0.333333	0	0	0.0769231	0.269231	0.0769231	0.0384615	0.115385	0.423077	0	0	['ast', 'ex', 'inh', 'oli']	['ast', 'ex', 'inh', 'opc', 'oli']
3510	METRNL	full-splice_match	0.259259	0	0.259259	0.148148	0.148148	0.185185	0	0	0.1875	0.1875	0.1875	0	0.375	0.0625	0	0	['ast', 'inh', 'mic', 'opc', 'oli']	['ast', 'ex', 'inh', 'opc', 'oli']
3511	TBCD	incomplete-splice_match	0.0714286	0.5	0.178571	0	0.0714286	0.178571	0	0	0.0697674	0.44186	0.139535	0	0	0.348837	0	0	['ast', 'ex', 'inh', 'opc', 'oli']	['ast', 'ex', 'inh', 'oli']
3512	TBCD	incomplete-splice_match	0.0681818	0.0454545	0.0454545	0.0681818	0.0454545	0.727273	0	0	0.0333333	0.4	0.211111	0.0555556	0.0777778	0.222222	0	0	['ast', 'mic', 'oli']	['ex', 'inh', 'mic', 'opc', 'oli']
3514	TBCD	full-splice_match	0.0617284	0.691358	0.185185	0	0.0123457	0.0493827	0	0	0.0348837	0.581395	0.162791	0.0232558	0	0.197674	0	0	['ast', 'ex', 'inh']	['ex', 'inh', 'oli']
3517	TBCD	full-splice_match	0.111111	0.25	0.0833333	0.0833333	0.0555556	0.416667	0	0	0	0.7	0.3	0	0	0	0	0	['ast', 'ex', 'inh', 'mic', 'opc', 'oli']	['ex', 'inh']
3522	RILP	incomplete-splice_match	0.222222	0.388889	0.277778	0.0555556	0	0.0555556	0	0	0	0.5	0.1875	0.0625	0	0.25	0	0	['ast', 'ex', 'inh', 'mic', 'oli']	['ex', 'inh', 'mic', 'oli']
3525	RILP	novel_in_catalog	0	0.3	0.4	0	0	0.3	0	0	0	0.285714	0.571429	0	0	0.142857	0	0	['ex', 'inh', 'oli']	['ex', 'inh', 'oli']
3526	PRPF8	incomplete-splice_match	0.333333	0.666667	0	0	0	0	0	0	0.0641711	0.363636	0.197861	0.00534759	0.0374332	0.331551	0	0	['ast', 'ex']	['ast', 'ex', 'inh', 'oli']
3536	PRPF8	incomplete-splice_match	0.0434783	0.391304	0.217391	0	0.0869565	0.26087	0	0	0.157895	0.315789	0.157895	0	0.0526316	0.263158	0	0.0526316	['ex', 'inh', 'opc', 'oli']	['ast', 'ex', 'end', 'inh', 'opc', 'oli']
3539	PRPF8	full-splice_match	0	0.454545	0.136364	0.0454545	0.0454545	0.272727	0	0.0454545	0.166667	0.222222	0.0555556	0.111111	0.0555556	0.388889	0	0	['ex', 'inh', 'oli']	['ast', 'ex', 'inh', 'mic', 'opc', 'oli']
3545	TIMM22	incomplete-splice_match	0	0.714286	0.142857	0	0	0.142857	0	0	0.166667	0.166667	0.333333	0.166667	0	0.166667	0	0	['ex', 'inh', 'oli']	['ast', 'ex', 'inh', 'mic', 'oli']
3546	TIMM22	full-splice_match	0	0.304348	0.0869565	0	0	0.608696	0	0	0	0.184211	0.157895	0	0.0789474	0.552632	0.0263158	0	['ex', 'inh', 'oli']	['ex', 'inh', 'opc', 'oli']
3557	YWHAE	full-splice_match	0.0378647	0.433271	0.126629	0.0111732	0.0167598	0.372439	0	0.0018622	0.0274314	0.448047	0.167914	0.0141313	0.0182876	0.323358	0	0.000831255	['ex', 'inh', 'oli']	['ex', 'inh', 'oli']
3558	YWHAE	incomplete-splice_match	0	0.333333	0.166667	0	0	0.5	0	0	0.222222	0	0.111111	0.111111	0	0.555556	0	0	['ex', 'inh', 'oli']	['ast', 'inh', 'mic', 'oli']
3560	YWHAE	incomplete-splice_match	0.04	0.24	0.08	0.08	0	0.56	0	0	0	0.107143	0.0714286	0	0	0.821429	0	0	['ex', 'inh', 'mic', 'oli']	['ex', 'inh', 'oli']
3562	YWHAE	full-splice_match	0.1	0.4	0.05	0.1	0	0.35	0	0	0.0816327	0.163265	0.0816327	0.0204082	0.0204082	0.632653	0	0	['ast', 'ex', 'inh', 'mic', 'oli']	['ast', 'ex', 'inh', 'oli']
3564	YWHAE	full-splice_match	0.0385396	0.275862	0.0730223	0.0121704	0.0365112	0.551724	0.0020284	0.010142	0.058642	0.183642	0.0864198	0.0123457	0.037037	0.621914	0	0	['ex', 'inh', 'oli']	['ast', 'ex', 'inh', 'oli']
3565	YWHAE	full-splice_match	0.25	0.25	0.15	0	0.05	0.3	0	0	0.142857	0.190476	0.047619	0	0	0.619048	0	0	['ast', 'ex', 'inh', 'opc', 'oli']	['ast', 'ex', 'oli']
3573	ENSG00000282330	full-splice_match	0.075	0.15	0.075	0.025	0.025	0.65	0	0	0.0769231	0.153846	0.153846	0.025641	0.0769231	0.487179	0	0.025641	['ast', 'ex', 'inh', 'oli']	['ast', 'ex', 'inh', 'opc', 'oli']
3579	GPI	incomplete-splice_match	0.142857	0.714286	0	0	0	0.142857	0	0	0	0.8	0	0	0	0.2	0	0	['ast', 'ex', 'oli']	['ex', 'oli']
3584	LINC01480	full-splice_match	0	0	0	1	0	0	0	0	0	0	0	1	0	0	0	0	['mic']	['mic']
3586	ENSG00000280726	novel_not_in_catalog	0	0	0.5	0	0	0.166667	0	0.333333	0	0	0	0	0	0	0	1	['end', 'inh', 'oli']	['end']
3594	TAF4	full-splice_match	0	0.333333	0.166667	0	0	0.5	0	0	0.333333	0.333333	0.166667	0	0	0.166667	0	0	['ex', 'inh', 'oli']	['ast', 'ex', 'inh', 'oli']
3596	MYT1	incomplete-splice_match	0	0.166667	0	0	0.833333	0	0	0	0	0	0.111111	0	0.777778	0.111111	0	0	['ex', 'opc']	['inh', 'opc', 'oli']
3602	PCMTD2	full-splice_match	0.0647482	0.309353	0.115108	0.0431655	0.0791367	0.381295	0	0.00719424	0.046729	0.271028	0.149533	0.046729	0.0841121	0.401869	0	0	['ast', 'ex', 'inh', 'opc', 'oli']	['ex', 'inh', 'opc', 'oli']
3606	PCMTD2	incomplete-splice_match	0	0	0	0	0	1	0	0	0	0.25	0	0	0	0.75	0	0	['oli']	['ex', 'oli']
3607	PCMTD2	full-splice_match	0	0.125	0.125	0	0	0.75	0	0	0	0.0555556	0.111111	0	0.111111	0.722222	0	0	['ex', 'inh', 'oli']	['ex', 'inh', 'opc', 'oli']
3608	PCMTD2	incomplete-splice_match	0.111111	0.277778	0.0555556	0	0.0555556	0.5	0	0	0.0625	0.21875	0.0625	0	0.09375	0.5625	0	0	['ast', 'ex', 'inh', 'opc', 'oli']	['ast', 'ex', 'inh', 'opc', 'oli']
3610	SPATC1L	full-splice_match	0.0449438	0.359551	0.11236	0	0.011236	0.47191	0	0	0.0147059	0.294118	0.117647	0.0147059	0.0294118	0.514706	0	0.0147059	['ex', 'inh', 'oli']	['ex', 'inh', 'oli']
3614	LSS	full-splice_match	0	0.181818	0	0	0	0.818182	0	0	0	0.0666667	0.0666667	0	0	0.866667	0	0	['ex', 'oli']	['ex', 'inh', 'oli']
3620	BTG3	full-splice_match	0.0384615	0.230769	0.115385	0.0576923	0.0576923	0.5	0	0	0.0163934	0.196721	0.0819672	0.0163934	0.0819672	0.606557	0	0	['ex', 'inh', 'mic', 'opc', 'oli']	['ex', 'inh', 'opc', 'oli']
3623	ZNF280B	novel_in_catalog	0	0.733333	0.266667	0	0	0	0	0	0	0.2	0.4	0	0	0.4	0	0	['ex', 'inh']	['ex', 'inh', 'oli']
3625	ZNF280B	full-splice_match	0.428571	0.285714	0	0	0.142857	0.142857	0	0	0	0.625	0.25	0	0	0.125	0	0	['ast', 'ex', 'opc', 'oli']	['ex', 'inh', 'oli']
3632	RBFOX2	full-splice_match	0	0.454545	0.272727	0	0.0909091	0.181818	0	0	0.0227273	0.613636	0.295455	0	0	0.0681818	0	0	['ex', 'inh', 'opc', 'oli']	['ex', 'inh', 'oli']
3640	PVALB	full-splice_match	0.0238095	0.0119048	0.857143	0	0	0.107143	0	0	0	0	0.908163	0	0	0.0918367	0	0	['inh', 'oli']	['inh', 'oli']
3648	CHCHD10	full-splice_match	0.0971731	0.438163	0.169611	0.0318021	0.0371025	0.222615	0	0.00353357	0.076	0.381333	0.222667	0.0506667	0.0506667	0.214667	0	0.004	['ast', 'ex', 'inh', 'oli']	['ast', 'ex', 'inh', 'mic', 'opc', 'oli']
3652	CHCHD10	full-splice_match	0.5	0.333333	0.166667	0	0	0	0	0	0.285714	0.214286	0.214286	0	0.0714286	0.214286	0	0	['ast', 'ex', 'inh']	['ast', 'ex', 'inh', 'opc', 'oli']
3654	CHCHD10	novel_in_catalog	0	0.0714286	0.214286	0.0714286	0.0714286	0.571429	0	0	0	0.666667	0.333333	0	0	0	0	0	['ex', 'inh', 'mic', 'opc', 'oli']	['ex', 'inh']
3656	CHCHD10	incomplete-splice_match	0	0.333333	0.333333	0	0.333333	0	0	0	0	0.25	0.5	0	0	0.25	0	0	['ex', 'inh', 'opc']	['ex', 'inh', 'oli']
3657	CHCHD10	full-splice_match	0.363636	0.272727	0.0909091	0	0	0.272727	0	0	0.3	0.5	0.1	0	0	0.1	0	0	['ast', 'ex', 'inh', 'oli']	['ast', 'ex', 'inh', 'oli']
3662	SMARCB1	full-splice_match	0.0217391	0.108696	0.304348	0	0.0869565	0.478261	0	0	0.0142857	0.3	0.228571	0.0142857	0.0428571	0.4	0	0	['ex', 'inh', 'opc', 'oli']	['ex', 'inh', 'oli']
3668	SMARCB1	full-splice_match	0.0576923	0.480769	0.134615	0	0.0576923	0.269231	0	0	0.0377358	0.0943396	0.207547	0.0188679	0.0943396	0.528302	0.0188679	0	['ast', 'ex', 'inh', 'opc', 'oli']	['ex', 'inh', 'opc', 'oli']
3672	SLC2A11	full-splice_match	0	0.5	0.2	0	0	0.3	0	0	0	0.333333	0	0	0.666667	0	0	0	['ex', 'inh', 'oli']	['ex', 'opc']
3674	MIF_SLC2A11	fusion	0.016129	0.00806452	0.0645161	0.0241935	0.0403226	0.846774	0	0	0.020979	0.230769	0.125874	0.034965	0.027972	0.548951	0.0034965	0.00699301	['inh', 'oli']	['ex', 'inh', 'oli']
3675	SLC2A11	incomplete-splice_match	0	0	0	0	0	1	0	0	0	0.333333	0.0833333	0	0	0.583333	0	0	['oli']	['ex', 'inh', 'oli']
3676	SLC2A11	full-splice_match	0	0.25	0.125	0	0	0.625	0	0	0.111111	0.555556	0.222222	0	0	0.111111	0	0	['ex', 'inh', 'oli']	['ast', 'ex', 'inh', 'oli']
3677	MIF	full-splice_match	0.0506808	0.276853	0.0953101	0.0189107	0.0385779	0.503782	0.00226929	0.0136157	0.0317041	0.178336	0.138705	0.0220167	0.0347864	0.587406	0.00176134	0.00528402	['ast', 'ex', 'inh', 'oli']	['ex', 'inh', 'oli']
3678	MIF	full-splice_match	0.105263	0.263158	0.0526316	0.0263158	0.0526316	0.5	0	0	0.0392157	0.294118	0.235294	0.0392157	0.0196078	0.372549	0	0	['ast', 'ex', 'inh', 'opc', 'oli']	['ex', 'inh', 'oli']
3688	ENSG00000281354	full-splice_match	0.0909091	0.431818	0.159091	0.0227273	0.136364	0.159091	0	0	0.025641	0.487179	0.102564	0	0	0.384615	0	0	['ast', 'ex', 'inh', 'opc', 'oli']	['ex', 'inh', 'oli']
3704	DDT	full-splice_match	0.0455446	0.213861	0.0613861	0.0158416	0.039604	0.613861	0.0019802	0.00792079	0.055794	0.399142	0.150215	0.0128755	0.0600858	0.321888	0	0	['ex', 'inh', 'oli']	['ast', 'ex', 'inh', 'opc', 'oli']
3707	ENSG00000281582	full-splice_match	0.4	0.2	0	0	0	0.4	0	0	0	0.222222	0.222222	0.333333	0	0.222222	0	0	['ast', 'ex', 'oli']	['ex', 'inh', 'mic', 'oli']
3710	GSTT1	full-splice_match	0.0714286	0.0714286	0.357143	0	0	0.5	0	0	0.111111	0.0555556	0.166667	0	0	0.666667	0	0	['ast', 'ex', 'inh', 'oli']	['ast', 'ex', 'inh', 'oli']
3711	GSTT1	full-splice_match	0.16	0.12	0.4	0	0	0.32	0	0	0	0.25	0.75	0	0	0	0	0	['ast', 'ex', 'inh', 'oli']	['ex', 'inh']
3715	GSTT1	full-splice_match	0.0851064	0.0638298	0.0425532	0.0212766	0.0212766	0.765957	0	0	0.142077	0.0163934	0.125683	0.010929	0.0382514	0.661202	0.00546448	0	['ast', 'ex', 'oli']	['ast', 'inh', 'oli']
3718	GSTT1	full-splice_match	0.0659341	0.516484	0.296703	0	0	0.10989	0	0.010989	0	0.337349	0.445783	0.0120482	0.0120482	0.192771	0	0	['ast', 'ex', 'inh', 'oli']	['ex', 'inh', 'oli']
3724	GSTT1	full-splice_match	0.179487	0.179487	0.25641	0.025641	0.0512821	0.307692	0	0	0.0416667	0.166667	0.458333	0	0	0.333333	0	0	['ast', 'ex', 'inh', 'opc', 'oli']	['ex', 'inh', 'oli']
3725	GSTT1	full-splice_match	0.25	0.25	0	0	0	0.5	0	0	0.242424	0.0909091	0.121212	0.030303	0	0.515152	0	0	['ast', 'ex', 'oli']	['ast', 'ex', 'inh', 'oli']
3728	GSTT1	full-splice_match	0.0571429	0.0571429	0.142857	0	0.0285714	0.714286	0	0	0	0.133333	0.0666667	0	0	0.8	0	0	['ast', 'ex', 'inh', 'oli']	['ex', 'inh', 'oli']
3732	ENSG00000281099	full-splice_match	0.142857	0.285714	0.142857	0	0.428571	0	0	0	0	0.5	0.5	0	0	0	0	0	['ast', 'ex', 'inh', 'opc']	['ex', 'inh']
3735	ENSG00000281519	novel_not_in_catalog	0.0769231	0.538462	0	0.0769231	0	0.307692	0	0	0	0.294118	0.235294	0	0	0.470588	0	0	['ast', 'ex', 'mic', 'oli']	['ex', 'inh', 'oli']
3747	FRG1	full-splice_match	0	0.0294118	0.0882353	0.0294118	0.117647	0.705882	0	0.0294118	0	0.103448	0.0689655	0	0.172414	0.62069	0	0.0344828	['inh', 'opc', 'oli']	['ex', 'inh', 'opc', 'oli']
3754	SERF1B	full-splice_match	0.0769231	0.307692	0.0641026	0.0128205	0.0384615	0.487179	0	0.0128205	0.0661157	0.239669	0.165289	0.0247934	0.0661157	0.438017	0	0	['ast', 'ex', 'inh', 'oli']	['ast', 'ex', 'inh', 'opc', 'oli']
3755	SERF1B	incomplete-splice_match	0.129032	0.322581	0.0967742	0	0.0645161	0.354839	0	0.0322581	0.027027	0.378378	0.135135	0.027027	0.0540541	0.378378	0	0	['ast', 'ex', 'inh', 'opc', 'oli']	['ex', 'inh', 'opc', 'oli']
3756	SERF1B	full-splice_match	0	0	0	0	0	1	0	0	0	0.125	0.125	0	0.125	0.625	0	0	['oli']	['ex', 'inh', 'opc', 'oli']
3761	SERF1B	incomplete-splice_match	0	0.75	0	0	0.25	0	0	0	0.1	0.6	0.1	0	0	0.2	0	0	['ex', 'opc']	['ast', 'ex', 'inh', 'oli']
3762	SERF1B	full-splice_match	0	0.666667	0.333333	0	0	0	0	0	0	0.444444	0	0	0.222222	0.333333	0	0	['ex', 'inh']	['ex', 'opc', 'oli']
3764	SMN2	incomplete-splice_match	0.0869565	0.521739	0.130435	0.0217391	0.0217391	0.217391	0	0	0.0862069	0.396552	0.0517241	0.0172414	0	0.448276	0	0	['ast', 'ex', 'inh', 'oli']	['ast', 'ex', 'inh', 'oli']
3767	SMN2	full-splice_match	0.0625	0.0625	0.125	0.0625	0.1875	0.5	0	0	0	0.407407	0.259259	0	0	0.333333	0	0	['ast', 'ex', 'inh', 'mic', 'opc', 'oli']	['ex', 'inh', 'oli']
3768	SMN2	full-splice_match	0	0	0	0.153846	0.0769231	0.769231	0	0	0.0666667	0.266667	0.0666667	0.0666667	0	0.533333	0	0	['mic', 'opc', 'oli']	['ast', 'ex', 'inh', 'mic', 'oli']
3775	SERF1A	incomplete-splice_match	0.0444444	0.355556	0.0666667	0	0.0444444	0.488889	0	0	0.0408163	0.204082	0.22449	0.0204082	0.0612245	0.44898	0	0	['ex', 'inh', 'oli']	['ex', 'inh', 'opc', 'oli']
3776	SERF1A	full-splice_match	0.0759494	0.329114	0.164557	0	0.0506329	0.367089	0.0126582	0	0.0654206	0.261682	0.140187	0	0.0654206	0.46729	0	0	['ast', 'ex', 'inh', 'opc', 'oli']	['ast', 'ex', 'inh', 'opc', 'oli']
3777	SERF1A	full-splice_match	0	0	1	0	0	0	0	0	0.105263	0.157895	0.157895	0	0	0.578947	0	0	['inh']	['ast', 'ex', 'inh', 'oli']
3779	SERF1A	full-splice_match	0.125	0.5	0	0	0	0.375	0	0	0	0.2	0.4	0	0	0.4	0	0	['ast', 'ex', 'oli']	['ex', 'inh', 'oli']
3780	SERF1A	incomplete-splice_match	0.2	0.5	0.1	0	0	0.2	0	0	0	0	0	0.2	0	0.8	0	0	['ast', 'ex', 'inh', 'oli']	['mic', 'oli']
3782	SMN1	incomplete-splice_match	0.111111	0.402778	0.0972222	0.0555556	0.0138889	0.319444	0	0	0.0641026	0.448718	0.179487	0.0384615	0.0384615	0.230769	0	0	['ast', 'ex', 'inh', 'mic', 'oli']	['ast', 'ex', 'inh', 'oli']
3783	SMN1	full-splice_match	0.142857	0	0.047619	0.0952381	0.047619	0.666667	0	0	0.125	0	0	0	0.25	0.625	0	0	['ast', 'mic', 'oli']	['ast', 'opc', 'oli']
3784	SMN1	incomplete-splice_match	0	0	0.25	0	0	0.75	0	0	0.0625	0.5	0.125	0	0	0.3125	0	0	['inh', 'oli']	['ast', 'ex', 'inh', 'oli']
3788	BDP1	incomplete-splice_match	0.0867347	0.413265	0.0918367	0.0357143	0.0306122	0.336735	0	0.00510204	0.0707547	0.429245	0.160377	0.00943396	0.0141509	0.311321	0	0.00471698	['ast', 'ex', 'inh', 'oli']	['ast', 'ex', 'inh', 'oli']
3789	BDP1	incomplete-splice_match	0.142857	0.428571	0	0	0	0.428571	0	0	0.166667	0.25	0.0833333	0.0833333	0	0.416667	0	0	['ast', 'ex', 'oli']	['ast', 'ex', 'inh', 'mic', 'oli']
3791	BDP1	incomplete-splice_match	0	0.111111	0.444444	0	0	0.444444	0	0	0.333333	0	0.333333	0	0	0.333333	0	0	['ex', 'inh', 'oli']	['ast', 'inh', 'oli']
3807	GTF2H2	incomplete-splice_match	0	0.2	0	0	0	0.8	0	0	0.0769231	0.384615	0.153846	0.0769231	0	0.307692	0	0	['ex', 'oli']	['ast', 'ex', 'inh', 'mic', 'oli']
3809	GTF2H2	incomplete-splice_match	0.285714	0.142857	0.142857	0.142857	0	0.285714	0	0	0	0.277778	0.333333	0.0555556	0.0555556	0.277778	0	0	['ast', 'ex', 'inh', 'mic', 'oli']	['ex', 'inh', 'mic', 'opc', 'oli']
3821	GTF2H2	incomplete-splice_match	0	0.25	0	0	0	0.75	0	0	0.125	0.375	0.125	0	0	0.375	0	0	['ex', 'oli']	['ast', 'ex', 'inh', 'oli']
3825	GTF2H2	incomplete-splice_match	0	0.444444	0.222222	0.111111	0	0.222222	0	0	0	0.875	0.125	0	0	0	0	0	['ex', 'inh', 'mic', 'oli']	['ex', 'inh']
3837	MCCC2	incomplete-splice_match	0	0.25	0	0	0.125	0.625	0	0	0	0.181818	0.181818	0.0909091	0.0909091	0.454545	0	0	['ex', 'opc', 'oli']	['ex', 'inh', 'mic', 'opc', 'oli']
3840	ENSG00000290527	incomplete-splice_match	0	0	0	0	0.285714	0.714286	0	0	0	0.75	0.0833333	0.0416667	0	0.125	0	0	['opc', 'oli']	['ex', 'inh', 'oli']
3854	IFITM10	full-splice_match	0.039604	0.405941	0.267327	0.0594059	0.118812	0.108911	0	0	0	0.453846	0.353846	0.0230769	0.138462	0.0307692	0	0	['ex', 'inh', 'mic', 'opc', 'oli']	['ex', 'inh', 'opc']
3857	SMIM10L1	full-splice_match	0.0255102	0.438776	0.117347	0.0153061	0.0255102	0.372449	0	0.00510204	0.0501931	0.374517	0.11583	0	0.03861	0.416988	0.003861	0	['ex', 'inh', 'oli']	['ast', 'ex', 'inh', 'oli']
3860	TAS2R14	full-splice_match	0.05	0.25	0.05	0	0.1	0.55	0	0	0	0.47619	0.0952381	0	0	0.428571	0	0	['ast', 'ex', 'inh', 'opc', 'oli']	['ex', 'inh', 'oli']
3867	TAS2R15P	full-splice_match	0	0.0769231	0.153846	0.0769231	0	0.692308	0	0	0	0.285714	0.214286	0	0	0.5	0	0	['ex', 'inh', 'mic', 'oli']	['ex', 'inh', 'oli']
3868	PRH1	incomplete-splice_match	0.12	0.56	0.28	0	0	0.04	0	0	0.111111	0.388889	0.166667	0	0	0.333333	0	0	['ast', 'ex', 'inh']	['ast', 'ex', 'inh', 'oli']
3872	PRR4	novel_not_in_catalog	0	0.25	0.25	0	0	0.5	0	0	0	0	0.2	0	0.2	0.6	0	0	['ex', 'inh', 'oli']	['inh', 'opc', 'oli']
3874	TAS2R20	full-splice_match	0.111111	0.222222	0.222222	0	0.111111	0.333333	0	0	0	0.117647	0.235294	0.0588235	0.0588235	0.529412	0	0	['ast', 'ex', 'inh', 'opc', 'oli']	['ex', 'inh', 'mic', 'opc', 'oli']
3875	PRR4	novel_not_in_catalog	0	0	0.0909091	0	0.0909091	0.818182	0	0	0.0625	0.1875	0	0.0625	0.1875	0.5	0	0	['inh', 'opc', 'oli']	['ast', 'ex', 'mic', 'opc', 'oli']
3878	TAS2R19	full-splice_match	0	0.2	0.2	0	0.2	0.4	0	0	0.0434783	0.304348	0.26087	0	0	0.347826	0.0434783	0	['ex', 'inh', 'opc', 'oli']	['ex', 'inh', 'oli']
3879	TAS2R31	full-splice_match	0	0.230769	0.153846	0	0	0.615385	0	0	0	0.230769	0.307692	0.0769231	0	0.384615	0	0	['ex', 'inh', 'oli']	['ex', 'inh', 'mic', 'oli']
3880	PRR4	full-splice_match	0	0	0.0666667	0	0.0666667	0.8	0	0.0666667	0	0.157895	0.315789	0	0	0.526316	0	0	['end', 'inh', 'opc', 'oli']	['ex', 'inh', 'oli']
3884	TAS2R14	incomplete-splice_match	0	0.142857	0.0952381	0	0.047619	0.714286	0	0	0	0.285714	0.142857	0.0357143	0.0357143	0.5	0	0	['ex', 'inh', 'oli']	['ex', 'inh', 'oli']
3889	TAS2R30	full-splice_match	0	0.176471	0.176471	0.0588235	0.117647	0.470588	0	0	0.1	0.25	0.25	0.05	0.05	0.3	0	0	['ex', 'inh', 'mic', 'opc', 'oli']	['ast', 'ex', 'inh', 'mic', 'opc', 'oli']
3890	ENSG00000282675	full-splice_match	0.1	0.2	0.266667	0.1	0.0333333	0.3	0	0	0	0.428571	0.142857	0	0	0.428571	0	0	['ast', 'ex', 'inh', 'mic', 'oli']	['ex', 'inh', 'oli']
3893	ENSG00000282363	full-splice_match	0	0.125	0	0	0	0.875	0	0	0	0.363636	0.272727	0	0	0.363636	0	0	['ex', 'oli']	['ex', 'inh', 'oli']
3895	TAS2R13	full-splice_match	0	0.428571	0.142857	0	0	0.428571	0	0	0.111111	0.333333	0.111111	0.111111	0	0.333333	0	0	['ex', 'inh', 'oli']	['ast', 'ex', 'inh', 'mic', 'oli']
3898	HERC2	incomplete-splice_match	0.209302	0.186047	0.104651	0.0348837	0.0348837	0.430233	0	0	0.0819672	0.352459	0.139344	0.00819672	0.0737705	0.344262	0	0	['ast', 'ex', 'inh', 'oli']	['ast', 'ex', 'inh', 'opc', 'oli']
3908	HERC2P9	full-splice_match	0.0574713	0.287356	0.091954	0.0229885	0.0574713	0.436782	0	0.045977	0.0434783	0.440217	0.222826	0.00543478	0.0271739	0.25	0	0.0108696	['ast', 'ex', 'inh', 'opc', 'oli']	['ex', 'inh', 'oli']
3909	RPL41P2	full-splice_match	0.075	0.3	0.05	0.025	0.1	0.45	0	0	0.0487805	0.219512	0.097561	0.0487805	0.0243902	0.560976	0	0	['ast', 'ex', 'inh', 'opc', 'oli']	['ex', 'inh', 'oli']
3910	HERC2P9	novel_not_in_catalog	0.181818	0.272727	0.0909091	0.181818	0	0.272727	0	0	0	0.153846	0.153846	0	0.0769231	0.615385	0	0	['ast', 'ex', 'inh', 'mic', 'oli']	['ex', 'inh', 'opc', 'oli']
3912	HERC2P9	novel_not_in_catalog	0.166667	0.5	0.166667	0	0	0.166667	0	0	0.25	0.25	0.25	0	0	0.25	0	0	['ast', 'ex', 'inh', 'oli']	['ast', 'ex', 'inh', 'oli']
3915	SCG5	novel_not_in_catalog	0.00226757	0.287982	0.122449	0.00680272	0.0226757	0.557823	0	0	0.00819672	0.39959	0.241803	0	0.0389344	0.311475	0	0	['ex', 'inh', 'oli']	['ex', 'inh', 'oli']
3918	SCG5	incomplete-splice_match	0	0.5	0.166667	0	0.166667	0.166667	0	0	0	0	0	0	0	1	0	0	['ex', 'inh', 'opc', 'oli']	['oli']
3919	SCG5	incomplete-splice_match	0	1	0	0	0	0	0	0	0	0.5	0.25	0	0	0.25	0	0	['ex']	['ex', 'inh', 'oli']
3921	SCG5	novel_not_in_catalog	0	0.4	0	0	0	0.6	0	0	0	0	0.25	0	0	0.75	0	0	['ex', 'oli']	['inh', 'oli']
3940	APBA2	incomplete-splice_match	0.0901639	0.114754	0.147541	0.00819672	0.0737705	0.565574	0	0	0.0188679	0.150943	0.0566038	0.0377358	0.0943396	0.641509	0	0	['ast', 'ex', 'inh', 'opc', 'oli']	['ex', 'inh', 'opc', 'oli']
3941	APBA2	incomplete-splice_match	0	0.666667	0	0	0	0.333333	0	0	0.0487805	0.695122	0.158537	0	0.0487805	0.0487805	0	0	['ex', 'oli']	['ex', 'inh']
3955	FAN1	novel_not_in_catalog	0	0	0	0	0	1	0	0	0.1	0.2	0.2	0	0.1	0.4	0	0	['oli']	['ast', 'ex', 'inh', 'opc', 'oli']
3957	FAN1	incomplete-splice_match	0.0232558	0.162791	0	0	0	0.813953	0	0	0.0357143	0.178571	0.0357143	0.0357143	0.0357143	0.678571	0	0	['ex', 'oli']	['ex', 'oli']
3958	FAN1	novel_not_in_catalog	0	0	0	0.125	0	0.875	0	0	0	0.1	0.2	0.1	0	0.6	0	0	['mic', 'oli']	['ex', 'inh', 'mic', 'oli']
3965	KLF13	full-splice_match	0.0206186	0.206186	0.0824742	0.0103093	0.0309278	0.649485	0	0	0.0338983	0.152542	0.0847458	0.0338983	0	0.694915	0	0	['ex', 'inh', 'oli']	['ex', 'inh', 'oli']
3968	KLF13	novel_not_in_catalog	0	1	0	0	0	0	0	0	0	0.8	0.2	0	0	0	0	0	['ex']	['ex', 'inh']
3973	GREM1	full-splice_match	0	0	0	0	0	1	0	0	0	0	0	0	0	1	0	0	['oli']	['oli']
3988	MTMR10	incomplete-splice_match	0.1	0.1	0	0.1	0	0.7	0	0	0.0714286	0.142857	0	0	0	0.785714	0	0	['ast', 'ex', 'mic', 'oli']	['ast', 'ex', 'oli']
4013	ENTREP2	incomplete-splice_match									0	0.75	0.25	0	0	0	0	0	[]	['ex', 'inh']
4020	NSMCE3	full-splice_match	0.0634921	0.238095	0.142857	0.010582	0.0529101	0.486772	0	0.00529101	0.0756303	0.210084	0.210084	0.00840336	0.0420168	0.453782	0	0	['ast', 'ex', 'inh', 'opc', 'oli']	['ast', 'ex', 'inh', 'oli']
4022	ENSG00000282503	full-splice_match	0	0.5	0.5	0	0	0	0	0	0	0.65	0.35	0	0	0	0	0	['ex', 'inh']	['ex', 'inh']
4025	TJP1	incomplete-splice_match	0	0	0	0	0	1	0	0	0.125	0.046875	0.015625	0	0.015625	0.78125	0.015625	0	['oli']	['ast', 'oli']
4026	TJP1	incomplete-splice_match	0.0306122	0.00510204	0.0153061	0.0102041	0.0357143	0.887755	0	0.0153061	0.181818	0.181818	0.0909091	0	0	0.545455	0	0	['oli']	['ast', 'ex', 'inh', 'oli']
4041	HERC2	incomplete-splice_match	0.142857	0.428571	0	0.285714	0	0.142857	0	0	0.2	0.466667	0.0666667	0	0	0.266667	0	0	['ast', 'ex', 'mic', 'oli']	['ast', 'ex', 'inh', 'oli']
4043	TJP1	novel_not_in_catalog	0	0	0	0	0	1	0	0	0.0666667	0.0666667	0.0666667	0	0	0.733333	0.0666667	0	['oli']	['ast', 'ex', 'inh', 'oli', 'per']
4045	TJP1	novel_not_in_catalog	0.047619	0.0952381	0	0	0	0.857143	0	0	0.0465116	0.0465116	0.0465116	0	0	0.860465	0	0	['ex', 'oli']	['oli']
4047	TJP1	incomplete-splice_match	0	0.230769	0	0	0	0.307692	0	0.461538	0.2	0	0.2	0	0	0.2	0	0.4	['ex', 'end', 'oli']	['ast', 'end', 'inh', 'oli']
4054	TJP1	novel_not_in_catalog	0	0.333333	0	0	0	0.666667	0	0	0.125	0.125	0	0	0	0.75	0	0	['ex', 'oli']	['ast', 'ex', 'oli']
4058	HERC2	incomplete-splice_match	0.0909091	0.181818	0	0.0909091	0	0.636364	0	0	0.166667	0.5	0.166667	0	0	0.166667	0	0	['ast', 'ex', 'mic', 'oli']	['ast', 'ex', 'inh', 'oli']
4060	ENSG00000282368	incomplete-splice_match	0	1	0	0	0	0	0	0	0	0.75	0.25	0	0	0	0	0	['ex']	['ex', 'inh']
4063	RPH3AL-AS1	full-splice_match	0	0.8	0.2	0	0	0	0	0	0	1	0	0	0	0	0	0	['ex', 'inh']	['ex']
4064	LINC02210	full-splice_match	0	0.333333	0	0	0.111111	0.555556	0	0	0	0.363636	0.636364	0	0	0	0	0	['ex', 'opc', 'oli']	['ex', 'inh']
4066	LINC02210	full-splice_match	0.1	0.3	0	0	0	0.6	0	0	0	0.5	0.25	0	0	0.25	0	0	['ast', 'ex', 'oli']	['ex', 'inh', 'oli']
4068	LINC02210	full-splice_match	0.016129	0.548387	0.225806	0	0.016129	0.193548	0	0	0.0461538	0.6	0.276923	0	0	0.0769231	0	0	['ex', 'inh', 'oli']	['ex', 'inh', 'oli']
4069	MAPT	incomplete-splice_match	0	0.525424	0.118644	0	0.0338983	0.305085	0	0.0169492	0.0735294	0.25	0.205882	0	0.0735294	0.397059	0	0	['ex', 'inh', 'oli']	['ast', 'ex', 'inh', 'opc', 'oli']
4070	MAPT	full-splice_match	0	0.8125	0.0416667	0	0.0416667	0.104167	0	0	0.0677966	0.423729	0.20339	0.0169492	0.0169492	0.271186	0	0	['ex', 'oli']	['ast', 'ex', 'inh', 'oli']
4071	MAPT	full-splice_match	0.0344828	0.241379	0.189655	0	0.0862069	0.448276	0	0	0	0.433333	0.166667	0	0	0.4	0	0	['ex', 'inh', 'opc', 'oli']	['ex', 'inh', 'oli']
4073	MAPT	full-splice_match	0.0869565	0.347826	0.217391	0	0.0869565	0.26087	0	0	0	0.0555556	0.111111	0	0	0.833333	0	0	['ast', 'ex', 'inh', 'opc', 'oli']	['ex', 'inh', 'oli']
4074	MAPT	incomplete-splice_match	0	0	0.333333	0	0	0.666667	0	0	0	0	0.333333	0	0.333333	0.333333	0	0	['inh', 'oli']	['inh', 'opc', 'oli']
4075	MAPT	novel_not_in_catalog	0	0.5	0	0	0	0.5	0	0	0	0.222222	0	0	0	0.777778	0	0	['ex', 'oli']	['ex', 'oli']
4078	MAPT	novel_in_catalog	0.0862069	0.137931	0.137931	0	0.0862069	0.551724	0	0	0	0.5	0.166667	0	0.166667	0.166667	0	0	['ast', 'ex', 'inh', 'opc', 'oli']	['ex', 'inh', 'opc', 'oli']
4079	MAPT	incomplete-splice_match	0	0.666667	0	0	0	0.333333	0	0	0	0.5	0	0	0	0.5	0	0	['ex', 'oli']	['ex', 'oli']
4082	MAPT	incomplete-splice_match	0	0.333333	0.111111	0	0	0.555556	0	0	0	0.25	0.25	0	0	0.5	0	0	['ex', 'inh', 'oli']	['ex', 'inh', 'oli']
4083	MAPT-IT1	full-splice_match	0.0294118	0.647059	0.117647	0	0.0294118	0.176471	0	0	0.0384615	0.5	0.0769231	0	0	0.384615	0	0	['ex', 'inh', 'oli']	['ex', 'inh', 'oli']
4084	Metazoa_SRP	full-splice_match	0.05	0.45	0.025	0	0.05	0.425	0	0	0	0.318182	0.227273	0	0	0.454545	0	0	['ast', 'ex', 'opc', 'oli']	['ex', 'inh', 'oli']
4087	MAPT	full-splice_match	0.0882353	0.352941	0.147059	0	0	0.411765	0	0	0.0416667	0.458333	0.125	0	0	0.375	0	0	['ast', 'ex', 'inh', 'oli']	['ex', 'inh', 'oli']
4094	KANSL1-AS1	full-splice_match	0.2	0	0	0.2	0	0.6	0	0	0.136364	0	0.136364	0.0909091	0	0.636364	0	0	['ast', 'mic', 'oli']	['ast', 'inh', 'mic', 'oli']
4105	LRRC37A2	incomplete-splice_match	0.153846	0.538462	0.0769231	0	0	0.230769	0	0	0.1	0.4	0.05	0	0	0.45	0	0	['ast', 'ex', 'inh', 'oli']	['ast', 'ex', 'inh', 'oli']
4108	NSFP1	incomplete-splice_match	0	0.5	0.0833333	0.0833333	0.0833333	0.25	0	0	0	0.777778	0	0	0	0.222222	0	0	['ex', 'inh', 'mic', 'opc', 'oli']	['ex', 'oli']
4110	NSFP1	incomplete-splice_match	0	0	0	0	0	1	0	0	0	0.166667	0.666667	0	0	0.166667	0	0	['oli']	['ex', 'inh', 'oli']
4111	NSFP1	incomplete-splice_match	0	0.555556	0.185185	0	0	0.259259	0	0	0.0769231	0.230769	0.230769	0	0.0769231	0.384615	0	0	['ex', 'inh', 'oli']	['ast', 'ex', 'inh', 'opc', 'oli']
4112	NSF	incomplete-splice_match	0	0.714286	0.285714	0	0	0	0	0	0.25	0	0.25	0.25	0.25	0	0	0	['ex', 'inh']	['ast', 'inh', 'mic', 'opc']
4114	NSF	incomplete-splice_match	0	0.222222	0.555556	0	0	0.222222	0	0	0	0.714286	0.142857	0	0.142857	0	0	0	['ex', 'inh', 'oli']	['ex', 'inh', 'opc']
4122	NSF	incomplete-splice_match	0	0	0	0	0	1	0	0	0	0.775862	0.137931	0	0	0.0862069	0	0	['oli']	['ex', 'inh', 'oli']
4124	NSF	incomplete-splice_match	0	0.142857	0.428571	0.142857	0.142857	0.142857	0	0	0.0277778	0.583333	0.305556	0	0	0.0833333	0	0	['ex', 'inh', 'mic', 'opc', 'oli']	['ex', 'inh', 'oli']
4126	LINC02210	full-splice_match	0	0.52381	0.238095	0	0	0.238095	0	0	0.0526316	0.473684	0.210526	0	0.0526316	0.210526	0	0	['ex', 'inh', 'oli']	['ast', 'ex', 'inh', 'opc', 'oli']
4128	MAPT-AS1	full-splice_match	0	0.333333	0	0	0	0.666667	0	0	0	0.2	0	0	0	0.8	0	0	['ex', 'oli']	['ex', 'oli']
4133	KANSL1	full-splice_match	0.119522	0.442231	0.163347	0.0159363	0.0278884	0.219124	0.00398406	0.00796813	0.0350877	0.45614	0.157895	0.105263	0	0.245614	0	0	['ast', 'ex', 'inh', 'oli']	['ex', 'inh', 'mic', 'oli']
4136	PLEKHM1	incomplete-splice_match	0	0.333333	0.0666667	0	0	0.6	0	0	0.142857	0.142857	0.142857	0	0.047619	0.52381	0	0	['ex', 'inh', 'oli']	['ast', 'ex', 'inh', 'oli']
4138	KANSL1	incomplete-splice_match	0.16129	0.225806	0.0967742	0.0322581	0.0645161	0.419355	0	0	0.133333	0.1	0.0333333	0.0333333	0.0333333	0.666667	0	0	['ast', 'ex', 'inh', 'opc', 'oli']	['ast', 'ex', 'oli']
4139	KANSL1	full-splice_match	0	0.428571	0.285714	0	0	0.285714	0	0	0.0588235	0.176471	0.294118	0	0	0.470588	0	0	['ex', 'inh', 'oli']	['ast', 'ex', 'inh', 'oli']
4143	KANSL1	incomplete-splice_match	0	0.5	0	0.125	0	0.375	0	0	0.222222	0.222222	0	0	0.222222	0.333333	0	0	['ex', 'mic', 'oli']	['ast', 'ex', 'opc', 'oli']
4148	ARHGAP27	full-splice_match	0	0.1	0.3	0.5	0	0.1	0	0	0	0.111111	0.333333	0.222222	0	0.333333	0	0	['ex', 'inh', 'mic', 'oli']	['ex', 'inh', 'mic', 'oli']
4150	ARL17B	incomplete-splice_match	0	0.8	0	0	0.2	0	0	0	0.0833333	0.333333	0.0833333	0.0833333	0.166667	0.25	0	0	['ex', 'opc']	['ast', 'ex', 'inh', 'mic', 'opc', 'oli']
4151	ARL17B	incomplete-splice_match	0.0810811	0.405405	0.108108	0.0540541	0.0810811	0.27027	0	0	0.030303	0.393939	0.212121	0.0909091	0	0.272727	0	0	['ast', 'ex', 'inh', 'mic', 'opc', 'oli']	['ex', 'inh', 'mic', 'oli']
4154	RPS7P11	full-splice_match	0	0.5	0	0	0.125	0.375	0	0	0.2	0.4	0.1	0	0	0.3	0	0	['ex', 'opc', 'oli']	['ast', 'ex', 'inh', 'oli']
4156	WNT3	full-splice_match	0	0.818182	0.181818	0	0	0	0	0	0	0.9	0.1	0	0	0	0	0	['ex', 'inh']	['ex', 'inh']
4162	TIMM22	full-splice_match	0	0	0.176471	0	0.117647	0.705882	0	0	0.0526316	0.263158	0.105263	0	0.157895	0.421053	0	0	['inh', 'opc', 'oli']	['ast', 'ex', 'inh', 'opc', 'oli']
4164	TIMM22	incomplete-splice_match	0	0.25	0.75	0	0	0	0	0	0	0	0.666667	0.333333	0	0	0	0	['ex', 'inh']	['inh', 'mic']
4178	ENSG00000282460	full-splice_match	0	0.333333	0.666667	0	0	0	0	0	0	0.4	0	0	0.2	0.4	0	0	['ex', 'inh']	['ex', 'opc', 'oli']
4188	CLN8	full-splice_match	0	0	0	0.111111	0	0.888889	0	0	0	0	0	0	0.125	0.75	0	0.125	['mic', 'oli']	['end', 'opc', 'oli']
4191	CLN8-AS1	full-splice_match	0.0687023	0.0839695	0.0229008	0.0381679	0.0305344	0.748092	0	0.00763359	0.0628019	0.0772947	0.0483092	0.0241546	0.0386473	0.748792	0	0	['ast', 'ex', 'oli']	['ast', 'ex', 'oli']
4196	SMDT1	full-splice_match	0.0322581	0.387097	0.193548	0	0	0.387097	0	0	0	0.409836	0.163934	0.0491803	0	0.377049	0	0	['ex', 'inh', 'oli']	['ex', 'inh', 'oli']
4201	SMDT1	full-splice_match	0.0625	0.334821	0.0848214	0.00892857	0.0446429	0.455357	0	0.00892857	0.033195	0.211618	0.124481	0.0373444	0.033195	0.556017	0	0.00414938	['ast', 'ex', 'inh', 'oli']	['ex', 'inh', 'oli']
4208	NDUFA6	full-splice_match	0.119403	0.253731	0.134328	0.0298507	0.0597015	0.38806	0	0.0149254	0.116279	0.27907	0.0930233	0.0232558	0.0465116	0.44186	0	0	['ast', 'ex', 'inh', 'opc', 'oli']	['ast', 'ex', 'inh', 'oli']
4213	OLA1P1	full-splice_match	0.111111	0.444444	0.222222	0	0	0.222222	0	0	0	0.5	0.5	0	0	0	0	0	['ast', 'ex', 'inh', 'oli']	['ex', 'inh']
4218	MUC20	full-splice_match	0.333333	0.111111	0.222222	0	0	0.333333	0	0	0.5	0	0	0	0	0.5	0	0	['ast', 'ex', 'inh', 'oli']	['ast', 'oli']
4225	MUC20-OT1	full-splice_match	0.2	0.4	0	0	0	0.4	0	0	0.2	0.5	0	0.1	0	0.2	0	0	['ast', 'ex', 'oli']	['ast', 'ex', 'mic', 'oli']
4240	TFPT	full-splice_match	0	0.555556	0.111111	0	0.111111	0.222222	0	0	0.0833333	0.25	0.333333	0	0	0.333333	0	0	['ex', 'inh', 'opc', 'oli']	['ast', 'ex', 'inh', 'oli']
4241	PRPF31	full-splice_match	0	0	0	0	0	1	0	0	0	0	0.166667	0	0	0.833333	0	0	['oli']	['inh', 'oli']
4248	LENG1	full-splice_match	0	0.111111	0.111111	0	0	0.777778	0	0	0	0.0909091	0.181818	0	0	0.727273	0	0	['ex', 'inh', 'oli']	['ex', 'inh', 'oli']
4249	RPS9	full-splice_match	0.0411449	0.105546	0.0447227	0.0411449	0.0232558	0.733453	0.00178891	0.00894454	0.0425532	0.0957447	0.0505319	0.0625	0.0345745	0.703457	0	0.0106383	['ex', 'oli']	['ex', 'inh', 'mic', 'oli']
4275	TTYH1	full-splice_match	0.141553	0.260274	0.0136986	0.00913242	0.0365297	0.538813	0	0	0.169399	0.142077	0.0163934	0.00546448	0.0928962	0.57377	0	0	['ast', 'ex', 'oli']	['ast', 'ex', 'opc', 'oli']
4280	TTYH1	incomplete-splice_match	0.0434783	0	0	0	0	0.956522	0	0	0.272727	0	0	0	0	0.727273	0	0	['oli']	['ast', 'oli']
4283	ENSG00000275797	full-splice_match	0	0.458333	0.208333	0	0	0.333333	0	0	0.0416667	0.291667	0.25	0	0.0416667	0.375	0	0	['ex', 'inh', 'oli']	['ex', 'inh', 'oli']
4285	LENG9	full-splice_match	0.235294	0.294118	0.0588235	0.0588235	0	0.352941	0	0	0.0571429	0.6	0.0857143	0	0	0.257143	0	0	['ast', 'ex', 'inh', 'mic', 'oli']	['ast', 'ex', 'inh', 'oli']
4300	RPS6KA1	incomplete-splice_match	0.0169492	0.0169492	0.0338983	0.355932	0.0508475	0.508475	0	0.0169492	0	0	0.0526316	0.333333	0	0.614035	0	0	['mic', 'opc', 'oli']	['inh', 'mic', 'oli']
4306	SLC16A1	full-splice_match	0.121212	0.0909091	0.0606061	0.030303	0.030303	0.545455	0	0.121212	0.0882353	0.0294118	0	0.0294118	0.0588235	0.764706	0	0.0294118	['ast', 'ex', 'end', 'inh', 'oli']	['ast', 'opc', 'oli']
4309	SLC16A1	full-splice_match	0	0.157895	0.157895	0	0	0.631579	0	0.0526316	0	0.130435	0.173913	0.0869565	0	0.608696	0	0	['ex', 'end', 'inh', 'oli']	['ex', 'inh', 'mic', 'oli']
4311	ZNF852	full-splice_match	0.2	0.4	0.3	0	0	0.1	0	0	0.111111	0.555556	0.222222	0	0.111111	0	0	0	['ast', 'ex', 'inh', 'oli']	['ast', 'ex', 'inh', 'opc']
4315	ZNF660	full-splice_match	0.153846	0.0769231	0	0.0769231	0.153846	0.538462	0	0	0	0.333333	0	0	0	0.666667	0	0	['ast', 'ex', 'mic', 'opc', 'oli']	['ex', 'oli']
4318	ZNF35	full-splice_match	0	0.25	0	0	0	0.75	0	0	0	0	0.333333	0	0	0.666667	0	0	['ex', 'oli']	['inh', 'oli']
4321	ENSG00000281102	full-splice_match	0.142857	0.321429	0.142857	0	0	0.392857	0	0	0.130435	0.173913	0.130435	0	0.130435	0.434783	0	0	['ast', 'ex', 'inh', 'oli']	['ast', 'ex', 'inh', 'opc', 'oli']
4322	ZNF852	full-splice_match	0.0759494	0.126582	0.0886076	0.0253165	0.0379747	0.64557	0	0	0.0769231	0.205128	0.0512821	0.025641	0.128205	0.512821	0	0	['ast', 'ex', 'inh', 'oli']	['ast', 'ex', 'inh', 'opc', 'oli']
4325	ZKSCAN7-AS1	incomplete-splice_match	0.0909091	0.272727	0.181818	0	0.0909091	0.363636	0	0	0.0666667	0.266667	0.2	0.0666667	0.0666667	0.333333	0	0	['ast', 'ex', 'inh', 'opc', 'oli']	['ast', 'ex', 'inh', 'mic', 'opc', 'oli']
4332	KIAA1143	full-splice_match	0.0196078	0.176471	0.0784314	0.0196078	0.0392157	0.647059	0	0.0196078	0.0273973	0.123288	0.109589	0.0273973	0.0684932	0.616438	0	0.0273973	['ex', 'inh', 'oli']	['ex', 'inh', 'opc', 'oli']
4334	KIAA1143	incomplete-splice_match	0.047619	0.285714	0	0	0	0.619048	0	0.047619	0.0434783	0.173913	0.0869565	0	0.0434783	0.652174	0	0	['ex', 'oli']	['ex', 'inh', 'oli']
4336	TMEM42	full-splice_match	0	0.509804	0.117647	0	0.0392157	0.333333	0	0	0.03	0.18	0.11	0.03	0.03	0.62	0	0	['ex', 'inh', 'oli']	['ex', 'inh', 'oli']
4338	TMEM42	novel_not_in_catalog	0.139535	0.139535	0.139535	0.0232558	0	0.55814	0	0	0.0444444	0.244444	0.111111	0.0444444	0	0.555556	0	0	['ast', 'ex', 'inh', 'oli']	['ex', 'inh', 'oli']
4347	RPL7A	full-splice_match	0.0329897	0.26134	0.0907216	0.0391753	0.0278351	0.542784	0.000515464	0.00463918	0.0309927	0.275545	0.122034	0.0387409	0.0343826	0.491041	0.000484262	0.00677966	['ex', 'inh', 'oli']	['ex', 'inh', 'oli']
4349	RPL7A	incomplete-splice_match	0	0.3	0.2	0	0	0.5	0	0	0.0833333	0.166667	0	0.0833333	0.0833333	0.583333	0	0	['ex', 'inh', 'oli']	['ast', 'ex', 'mic', 'opc', 'oli']
4350	RPL7A	full-splice_match	0.0384615	0.153846	0.0384615	0.0769231	0.0384615	0.615385	0.0384615	0	0.1875	0.28125	0.09375	0	0.03125	0.40625	0	0	['ex', 'mic', 'oli']	['ast', 'ex', 'inh', 'oli']
4355	RPL7A	incomplete-splice_match	0.2	0	0	0	0.4	0.4	0	0	0	0.125	0.125	0	0.125	0.625	0	0	['ast', 'opc', 'oli']	['ex', 'inh', 'opc', 'oli']
4357	RPL7A	incomplete-splice_match	0.0379747	0.468354	0.113924	0.0379747	0.0253165	0.278481	0	0.0379747	0.0131579	0.355263	0.131579	0.0526316	0.0526316	0.394737	0	0	['ex', 'inh', 'oli']	['ex', 'inh', 'mic', 'opc', 'oli']
4361	RPL7A	incomplete-splice_match	0	0.1	0	0.1	0	0.8	0	0	0	0	0	0	0.25	0.75	0	0	['ex', 'mic', 'oli']	['opc', 'oli']
4363	RPL7A	incomplete-splice_match	0	0.307692	0.0769231	0.153846	0	0.461538	0	0	0.117647	0.235294	0.117647	0.0588235	0.0588235	0.411765	0	0	['ex', 'inh', 'mic', 'oli']	['ast', 'ex', 'inh', 'mic', 'opc', 'oli']
4371	SURF2	full-splice_match	0.03125	0.296875	0.03125	0.03125	0.078125	0.53125	0	0	0.111111	0.238095	0.111111	0.047619	0.047619	0.444444	0	0	['ex', 'opc', 'oli']	['ast', 'ex', 'inh', 'oli']
4372	SURF2	novel_in_catalog	0.0833333	0.5	0	0	0	0.416667	0	0	0	0.125	0.25	0	0.125	0.5	0	0	['ast', 'ex', 'oli']	['ex', 'inh', 'opc', 'oli']
4381	SURF1	full-splice_match	0.0375	0.2	0.075	0.025	0	0.6625	0	0	0.0679612	0.116505	0.0485437	0.0485437	0.0485437	0.669903	0	0	['ex', 'inh', 'oli']	['ast', 'ex', 'oli']
4382	SURF1	full-splice_match	0.0769231	0.230769	0.269231	0	0	0.423077	0	0	0.0410959	0.287671	0.260274	0	0.0547945	0.356164	0	0	['ast', 'ex', 'inh', 'oli']	['ex', 'inh', 'opc', 'oli']
4384	SURF1	full-splice_match	0.08	0.04	0	0.04	0.08	0.76	0	0	0.125	0.0625	0.0625	0	0	0.75	0	0	['ast', 'opc', 'oli']	['ast', 'ex', 'inh', 'oli']
4388	SURF1	incomplete-splice_match	0	0.5	0.25	0	0	0.25	0	0	0	0.5	0.333333	0	0	0.166667	0	0	['ex', 'inh', 'oli']	['ex', 'inh', 'oli']
4390	SURF4	full-splice_match	0.088	0.08	0.032	0.04	0.056	0.688	0	0.016	0.037037	0.148148	0.037037	0.0740741	0.037037	0.666667	0	0	['ast', 'ex', 'opc', 'oli']	['ex', 'mic', 'oli']
4398	STKLD1	novel_in_catalog	0	0.857143	0	0	0	0.142857	0	0	0	0.636364	0.272727	0	0	0.0909091	0	0	['ex', 'oli']	['ex', 'inh', 'oli']
4404	ADAMTS13	incomplete-splice_match	0.2	0.4	0.2	0	0	0.2	0	0	0.0909091	0.863636	0	0	0	0.0454545	0	0	['ast', 'ex', 'inh', 'oli']	['ast', 'ex']
4407	CACFD1	full-splice_match	0.0833333	0.583333	0.25	0	0	0.0833333	0	0	0.111111	0.5	0.166667	0	0.0555556	0.166667	0	0	['ast', 'ex', 'inh', 'oli']	['ast', 'ex', 'inh', 'opc', 'oli']
4409	SLC2A6	incomplete-splice_match	0.0208333	0.666667	0.229167	0	0	0.0625	0	0.0208333	0	0	0.2	0.1	0.1	0.6	0	0	['ex', 'inh', 'oli']	['inh', 'mic', 'opc', 'oli']
4412	KAT6B	incomplete-splice_match	0.0933333	0.573333	0.106667	0	0.0133333	0.213333	0	0	0.0987654	0.481481	0.111111	0.0493827	0.0246914	0.222222	0	0.0123457	['ast', 'ex', 'inh', 'oli']	['ast', 'ex', 'inh', 'oli']
4417	KAT6B	full-splice_match	0.12	0.52	0.12	0.04	0.08	0.12	0	0	0.0588235	0.588235	0.176471	0	0.0588235	0.117647	0	0	['ast', 'ex', 'inh', 'opc', 'oli']	['ast', 'ex', 'inh', 'opc', 'oli']
4418	KAT6B	full-splice_match	0	0	1	0	0	0	0	0	0	0.5	0.25	0	0	0.25	0	0	['inh']	['ex', 'inh', 'oli']
4423	KAT6B	incomplete-splice_match	0.166667	0.333333	0	0	0	0.5	0	0	0.1875	0.25	0.125	0	0.03125	0.40625	0	0	['ast', 'ex', 'oli']	['ast', 'ex', 'inh', 'oli']
4429	CENATAC	incomplete-splice_match	0.142857	0.142857	0.428571	0	0	0.285714	0	0	0	0.25	0	0	0	0.75	0	0	['ast', 'ex', 'inh', 'oli']	['ex', 'oli']
4431	CENATAC	full-splice_match	0.03125	0.40625	0.03125	0.03125	0.03125	0.46875	0	0	0.125	0.208333	0.0833333	0.0208333	0.104167	0.458333	0	0	['ex', 'oli']	['ast', 'ex', 'inh', 'opc', 'oli']
4437	TRAPPC4	full-splice_match	0.0614035	0.175439	0.0789474	0.0175439	0.0350877	0.631579	0	0	0.0172414	0.356322	0.206897	0.0114943	0.0574713	0.350575	0	0	['ast', 'ex', 'inh', 'oli']	['ex', 'inh', 'opc', 'oli']
4439	TRAPPC4	full-splice_match	0	0.6875	0.125	0.0208333	0.0625	0.104167	0	0	0.0588235	0.117647	0.0588235	0	0.0588235	0.705882	0	0	['ex', 'inh', 'opc', 'oli']	['ast', 'ex', 'inh', 'opc', 'oli']
4445	HYOU1	incomplete-splice_match	0.214286	0.5	0	0	0.0714286	0.214286	0	0	0.1	0.25	0.2	0	0.05	0.4	0	0	['ast', 'ex', 'opc', 'oli']	['ast', 'ex', 'inh', 'opc', 'oli']
4446	HYOU1	incomplete-splice_match	0.166667	0.166667	0.0833333	0	0.0833333	0.5	0	0	0.235294	0.235294	0.0588235	0.0588235	0.0588235	0.352941	0	0	['ast', 'ex', 'inh', 'opc', 'oli']	['ast', 'ex', 'inh', 'mic', 'opc', 'oli']
4448	RPS25	full-splice_match	0.0837961	0.195356	0.0671378	0.0459364	0.0232206	0.579001	0	0.00555275	0.0817637	0.172089	0.0984589	0.0475171	0.0252568	0.568493	0.00128425	0.00513699	['ast', 'ex', 'inh', 'oli']	['ast', 'ex', 'inh', 'oli']
4449	RPS25	novel_in_catalog	0	0.230769	0.0769231	0	0	0.692308	0	0	0	0.4	0.1	0	0	0.5	0	0	['ex', 'inh', 'oli']	['ex', 'inh', 'oli']
4450	RPS25	full-splice_match	0	0.266667	0.0666667	0	0	0.666667	0	0	0	0.172414	0.137931	0.103448	0	0.586207	0	0	['ex', 'inh', 'oli']	['ex', 'inh', 'mic', 'oli']
4452	RPS25	novel_in_catalog	0.2	0.2	0	0	0	0.6	0	0	0.0454545	0.318182	0.0909091	0	0.0454545	0.5	0	0	['ast', 'ex', 'oli']	['ex', 'inh', 'oli']
4453	RPS25	novel_in_catalog	0.05	0.35	0.05	0.1	0.15	0.3	0	0	0.333333	0.166667	0.166667	0	0	0.333333	0	0	['ast', 'ex', 'inh', 'mic', 'opc', 'oli']	['ast', 'ex', 'inh', 'oli']
4455	RPS25	incomplete-splice_match	0	0.25	0.25	0	0	0.5	0	0	0	0.2	0.2	0	0	0.6	0	0	['ex', 'inh', 'oli']	['ex', 'inh', 'oli']
4460	RPS25	incomplete-splice_match	0	0.2	0.2	0.1	0	0.5	0	0	0	0.384615	0.0769231	0	0	0.538462	0	0	['ex', 'inh', 'mic', 'oli']	['ex', 'inh', 'oli']
4462	RPS25	incomplete-splice_match	0	0	0.2	0	0	0.8	0	0	0	0.25	0	0.25	0	0.5	0	0	['inh', 'oli']	['ex', 'mic', 'oli']
4463	RPS25	full-splice_match	0.25	0.25	0.125	0	0.125	0.25	0	0	0.181818	0.363636	0.0909091	0	0.0909091	0.272727	0	0	['ast', 'ex', 'inh', 'opc', 'oli']	['ast', 'ex', 'inh', 'opc', 'oli']
4473	VPS11-DT	full-splice_match	0.0864198	0.271605	0.0617284	0.037037	0.0123457	0.530864	0	0	0.0330579	0.355372	0.107438	0	0.0743802	0.429752	0	0	['ast', 'ex', 'inh', 'oli']	['ex', 'inh', 'opc', 'oli']
4475	VPS11	incomplete-splice_match	0.123596	0.11236	0.123596	0.11236	0.0337079	0.494382	0	0	0.0909091	0.321678	0.125874	0.034965	0.034965	0.384615	0	0.00699301	['ast', 'ex', 'inh', 'mic', 'oli']	['ast', 'ex', 'inh', 'oli']
4478	ENSG00000281677	full-splice_match	0.0392157	0.568627	0.294118	0	0.0196078	0.0784314	0	0	0.0810811	0.351351	0.189189	0.027027	0.0540541	0.297297	0	0	['ex', 'inh', 'oli']	['ast', 'ex', 'inh', 'opc', 'oli']
4479	DYRK1B	incomplete-splice_match	0.103448	0.172414	0.258621	0	0.0172414	0.448276	0	0	0	0.628571	0.285714	0	0	0.0857143	0	0	['ast', 'ex', 'inh', 'oli']	['ex', 'inh', 'oli']
4484	FBL	full-splice_match	0.0227273	0.0454545	0.0454545	0.0681818	0.0681818	0.75	0	0	0.0240964	0.216867	0.120482	0.0963855	0.0722892	0.46988	0	0	['mic', 'opc', 'oli']	['ex', 'inh', 'mic', 'opc', 'oli']
4485	FBL	incomplete-splice_match	0	0	0	0.2	0	0.8	0	0	0	0.4	0	0.1	0	0.5	0	0	['mic', 'oli']	['ex', 'mic', 'oli']
4486	FBL	incomplete-splice_match	0.333333	0.444444	0	0	0	0.222222	0	0	0	0.692308	0.153846	0	0	0.153846	0	0	['ast', 'ex', 'oli']	['ex', 'inh', 'oli']
4487	FCGBP	incomplete-splice_match	0.0555556	0.0555556	0	0.833333	0	0.0555556	0	0	0.181818	0	0	0.545455	0	0.272727	0	0	['ast', 'ex', 'mic', 'oli']	['ast', 'mic', 'oli']
4491	PSMC4	incomplete-splice_match	0.0294118	0.294118	0.0882353	0.0294118	0	0.558824	0	0	0.0540541	0.189189	0.162162	0.0540541	0.0810811	0.459459	0	0	['ex', 'inh', 'oli']	['ast', 'ex', 'inh', 'mic', 'opc', 'oli']
4492	PSMC4	full-splice_match	0.0610329	0.28169	0.0469484	0.0516432	0.0234742	0.535211	0	0	0.020202	0.222222	0.166667	0.0353535	0.040404	0.510101	0	0.00505051	['ast', 'ex', 'mic', 'oli']	['ex', 'inh', 'oli']
4493	PSMC4	full-splice_match	0	0.4	0.2	0	0	0.4	0	0	0.166667	0.333333	0.166667	0	0	0.333333	0	0	['ex', 'inh', 'oli']	['ast', 'ex', 'inh', 'oli']
4497	ZNF546	incomplete-splice_match	0	0.5	0	0	0	0.5	0	0	0.25	0.25	0.125	0	0	0.375	0	0	['ex', 'oli']	['ast', 'ex', 'inh', 'oli']
4512	NDUFA6	full-splice_match	0.137931	0.206897	0.0948276	0.0172414	0.0603448	0.482759	0	0	0.0662252	0.15894	0.172185	0.0331126	0.0662252	0.490066	0	0.013245	['ast', 'ex', 'inh', 'opc', 'oli']	['ast', 'ex', 'inh', 'opc', 'oli']
4518	OLA1P1	full-splice_match	0	0.833333	0	0	0.166667	0	0	0	0.333333	0	0	0	0.333333	0.333333	0	0	['ex', 'opc']	['ast', 'opc', 'oli']
4521	SERTAD4-AS1	full-splice_match	0	0.625	0.25	0	0	0.125	0	0	0	0.25	0.125	0	0	0.625	0	0	['ex', 'inh', 'oli']	['ex', 'inh', 'oli']
4522	SERTAD4-AS1	full-splice_match	0.016129	0.209677	0.016129	0	0	0.758065	0	0	0	0.160714	0.0892857	0	0	0.75	0	0	['ex', 'oli']	['ex', 'inh', 'oli']
4523	SERTAD4-AS1	novel_not_in_catalog	0.0434783	0.173913	0	0	0	0.73913	0	0.0434783	0.08	0.04	0	0	0	0.88	0	0	['ex', 'oli']	['ast', 'oli']
4524	SERTAD4-AS1	full-splice_match	0	0	0	0	0	1	0	0	0	0	0	0	0	1	0	0	['oli']	['oli']
4537	SCARNA5	full-splice_match	0.0377358	0.132075	0.0754717	0.0566038	0.0754717	0.603774	0.0188679	0	0.0877193	0.245614	0.175439	0.0175439	0.0701754	0.403509	0	0	['ex', 'inh', 'mic', 'opc', 'oli']	['ast', 'ex', 'inh', 'opc', 'oli']
4549	RYBP	full-splice_match	0	0.148148	0	0	0.037037	0.814815	0	0	0.0833333	0.0833333	0.0555556	0.0277778	0	0.75	0	0	['ex', 'oli']	['ast', 'ex', 'inh', 'oli']
4552	RYBP	incomplete-splice_match	0.0526316	0.105263	0	0.0526316	0	0.789474	0	0	0	0	0	0	0.333333	0.666667	0	0	['ast', 'ex', 'mic', 'oli']	['opc', 'oli']
4554	RYBP	incomplete-splice_match	0	0	0.2	0	0	0.8	0	0	0	0.5	0	0	0	0.5	0	0	['inh', 'oli']	['ex', 'oli']
4567	LRP6	incomplete-splice_match	0.181818	0.136364	0.0454545	0	0	0.636364	0	0	0.146341	0.195122	0.0731707	0	0.097561	0.487805	0	0	['ast', 'ex', 'oli']	['ast', 'ex', 'inh', 'opc', 'oli']
4569	BORCS5	full-splice_match	0	0.2	0	0	0.1	0.7	0	0	0	0.0588235	0.294118	0	0	0.647059	0	0	['ex', 'opc', 'oli']	['ex', 'inh', 'oli']
4577	BORCS5	full-splice_match	0	0	0.0454545	0.0454545	0	0.909091	0	0	0	0.0625	0	0	0	0.9375	0	0	['oli']	['ex', 'oli']
4583	MANSC1	incomplete-splice_match	0	0.666667	0.166667	0	0	0.166667	0	0	0.285714	0.285714	0	0	0	0.285714	0	0.142857	['ex', 'inh', 'oli']	['ast', 'ex', 'end', 'oli']
4585	LOH12CR2	full-splice_match	0	0.333333	0.166667	0	0	0.5	0	0	0	0.25	0.125	0	0	0.625	0	0	['ex', 'inh', 'oli']	['ex', 'inh', 'oli']
4590	DUSP16	incomplete-splice_match	0	0	0	0.125	0	0.875	0	0	0	0	0	0	0	1	0	0	['mic', 'oli']	['oli']
4602	SLC25A26	incomplete-splice_match	0.133333	0.0666667	0.0666667	0	0.0333333	0.7	0	0	0.0909091	0.363636	0.181818	0	0	0.363636	0	0	['ast', 'ex', 'inh', 'oli']	['ast', 'ex', 'inh', 'oli']
4612	SLC25A26	full-splice_match	0	0.238095	0.0952381	0	0.047619	0.619048	0	0	0	0	0.3	0	0	0.7	0	0	['ex', 'inh', 'oli']	['inh', 'oli']
4638	SCG5	full-splice_match	0	0.0666667	0.166667	0	0	0.766667	0	0	0	0.65	0.266667	0	0.0166667	0.0666667	0	0	['ex', 'inh', 'oli']	['ex', 'inh', 'oli']
4640	SCG5	full-splice_match	0.004329	0.341991	0.134199	0.004329	0.047619	0.467532	0	0	0	0.410359	0.183267	0.00796813	0.0318725	0.36255	0.00398406	0	['ex', 'inh', 'oli']	['ex', 'inh', 'oli']
4648	ENSG00000282670	full-splice_match	0.357143	0.214286	0.0714286	0.0714286	0	0.285714	0	0	0.0909091	0.181818	0.272727	0.136364	0.0454545	0.272727	0	0	['ast', 'ex', 'inh', 'mic', 'oli']	['ast', 'ex', 'inh', 'mic', 'oli']
4652	GREM1	full-splice_match	0	0.04	0	0	0	0.96	0	0	0	0	0	0	0	1	0	0	['oli']	['oli']
4655	ENSG00000282410	full-splice_match	0	0.555556	0	0.333333	0	0.111111	0	0	0	0.772727	0.136364	0.0909091	0	0	0	0	['ex', 'mic', 'oli']	['ex', 'inh', 'mic']
4661	IBTK	incomplete-splice_match	0	0.212121	0.121212	0.0606061	0	0.575758	0	0.030303	0.0625	0.0833333	0.125	0	0.0416667	0.6875	0	0	['ex', 'inh', 'mic', 'oli']	['ast', 'ex', 'inh', 'oli']
4670	CFL1P1	full-splice_match	0	0.5	0	0	0.25	0.25	0	0	0.2	0.3	0.3	0	0	0.2	0	0	['ex', 'opc', 'oli']	['ast', 'ex', 'inh', 'oli']
4673	novelGene_CFL1P1_AS	antisense	0.148148	0.222222	0.185185	0	0	0.407407	0	0.037037	0.195652	0.173913	0.152174	0	0.0217391	0.456522	0	0	['ast', 'ex', 'inh', 'oli']	['ast', 'ex', 'inh', 'oli']
4675	novelGene_CFL1P1_AS	antisense	0	0.0769231	0.153846	0.0769231	0	0.692308	0	0	0.111111	0.333333	0.333333	0	0	0.222222	0	0	['ex', 'inh', 'mic', 'oli']	['ast', 'ex', 'inh', 'oli']
4678	novelGene_CFL1P1_AS	antisense	0.0731707	0.365854	0.121951	0.0243902	0.0243902	0.365854	0.0243902	0	0.130435	0.282609	0.173913	0.130435	0.0869565	0.195652	0	0	['ast', 'ex', 'inh', 'oli']	['ast', 'ex', 'inh', 'mic', 'opc', 'oli']
4682	RPL11P3	full-splice_match	0.210526	0.263158	0.263158	0.105263	0.0526316	0.105263	0	0	0.142857	0.285714	0.285714	0	0	0.142857	0.142857	0	['ast', 'ex', 'inh', 'mic', 'opc', 'oli']	['ast', 'ex', 'inh', 'oli', 'per']
4683	PTEN	full-splice_match	0	0	0.142857	0.285714	0	0.571429	0	0	0	0.222222	0.222222	0	0	0.555556	0	0	['inh', 'mic', 'oli']	['ex', 'inh', 'oli']
4685	PTEN	full-splice_match	0	0.833333	0.166667	0	0	0	0	0	0	0.5	0	0	0	0.5	0	0	['ex', 'inh']	['ex', 'oli']
4690	CALB2	incomplete-splice_match	0.0909091	0	0.818182	0.0909091	0	0	0	0	0.0169492	0.0169492	0.966102	0	0	0	0	0	['ast', 'inh', 'mic']	['inh']
4693	CALB2	incomplete-splice_match	0	0	1	0	0	0	0	0	0	0.0384615	0.961538	0	0	0	0	0	['inh']	['inh']
4694	CALB2	full-splice_match	0.00934579	0.00934579	0.943925	0.00934579	0	0.0280374	0	0	0	0.0222222	0.948148	0.00740741	0	0.0222222	0	0	['inh']	['inh']
4699	ENSG00000283080	full-splice_match	0.0588235	0.294118	0.294118	0	0.0588235	0.294118	0	0	0	0.222222	0.444444	0	0	0.333333	0	0	['ast', 'ex', 'inh', 'opc', 'oli']	['ex', 'inh', 'oli']
4704	ENSG00000283002	full-splice_match	0.2	0.3	0.1	0.1	0	0.3	0	0	0	0.333333	0	0.333333	0	0.333333	0	0	['ast', 'ex', 'inh', 'mic', 'oli']	['ex', 'mic', 'oli']
4707	LINC01355	full-splice_match	0.12	0.2	0.13	0.05	0.05	0.44	0	0.01	0.0673077	0.326923	0.144231	0.0384615	0.0576923	0.365385	0	0	['ast', 'ex', 'inh', 'mic', 'opc', 'oli']	['ast', 'ex', 'inh', 'opc', 'oli']
4708	ZNF436-AS1	novel_in_catalog	0.25	0.25	0.1	0	0.05	0.35	0	0	0.105263	0.263158	0.210526	0	0	0.421053	0	0	['ast', 'ex', 'inh', 'opc', 'oli']	['ast', 'ex', 'inh', 'oli']
4709	ZNF436-AS1	full-splice_match	0.111111	0.111111	0.222222	0	0.111111	0.444444	0	0	0.166667	0.0833333	0.166667	0	0.166667	0.416667	0	0	['ast', 'ex', 'inh', 'opc', 'oli']	['ast', 'ex', 'inh', 'opc', 'oli']
4712	ZNF436-AS1	full-splice_match	0.0384615	0.346154	0.269231	0.0384615	0	0.269231	0	0.0384615	0.107143	0.357143	0.142857	0	0	0.392857	0	0	['ex', 'inh', 'oli']	['ast', 'ex', 'inh', 'oli']
4715	ZNF436-AS1	full-splice_match	0.121212	0.484848	0.212121	0	0	0.181818	0	0	0.0888889	0.533333	0.111111	0.0222222	0.0222222	0.222222	0	0	['ast', 'ex', 'inh', 'oli']	['ast', 'ex', 'inh', 'oli']
4716	ZNF436-AS1	full-splice_match	0.0434783	0.521739	0.173913	0	0.0434783	0.217391	0	0	0.15	0.45	0.2	0	0.1	0.1	0	0	['ex', 'inh', 'oli']	['ast', 'ex', 'inh', 'opc', 'oli']
4721	HNRNPR	novel_in_catalog	0	0	0	0	0	1	0	0	0	0	0.05	0	0	0.95	0	0	['oli']	['inh', 'oli']
4724	HNRNPR	novel_in_catalog	0	0.2	0.0666667	0.0666667	0	0.666667	0	0	0.2	0	0	0	0	0.8	0	0	['ex', 'inh', 'mic', 'oli']	['ast', 'oli']
4725	HNRNPR	novel_in_catalog	0	0	0	0	0	1	0	0	0	0.111111	0.111111	0	0.111111	0.666667	0	0	['oli']	['ex', 'inh', 'opc', 'oli']
4729	HNRNPR	incomplete-splice_match	0	0	0	0.166667	0	0.833333	0	0	0.0833333	0.166667	0.0833333	0.0833333	0	0.5	0	0.0833333	['mic', 'oli']	['ast', 'ex', 'end', 'inh', 'mic', 'oli']
4730	HNRNPR	incomplete-splice_match	0.0769231	0.115385	0.0384615	0	0.115385	0.653846	0	0	0.0526316	0.140351	0.105263	0.0877193	0.0877193	0.526316	0	0	['ast', 'ex', 'opc', 'oli']	['ast', 'ex', 'inh', 'mic', 'opc', 'oli']
4732	HNRNPR	novel_in_catalog	0.0384615	0.192308	0.0769231	0.0384615	0	0.615385	0	0.0384615	0.0769231	0.153846	0.0769231	0.0769231	0.0615385	0.538462	0	0.0153846	['ex', 'inh', 'oli']	['ast', 'ex', 'inh', 'mic', 'opc', 'oli']
4735	HNRNPR	incomplete-splice_match	0	0	0	0	0	1	0	0	0.285714	0	0.142857	0	0	0.571429	0	0	['oli']	['ast', 'inh', 'oli']
4737	HNRNPR	full-splice_match	0.2	0.2	0.1	0.1	0	0.4	0	0	0	0.2	0.3	0.2	0	0.3	0	0	['ast', 'ex', 'inh', 'mic', 'oli']	['ex', 'inh', 'mic', 'oli']
4739	HNRNPR	incomplete-splice_match	0	0.375	0.0625	0.0625	0	0.5	0	0	0.0833333	0.25	0.0416667	0.166667	0.0416667	0.416667	0	0	['ex', 'inh', 'mic', 'oli']	['ast', 'ex', 'mic', 'oli']
4744	ID3	full-splice_match	0.608247	0.0412371	0.0206186	0	0	0.185567	0.0103093	0.134021	0.537313	0.0149254	0	0	0	0.38806	0.0149254	0.0447761	['ast', 'end', 'oli']	['ast', 'oli']
4760	B3GALNT2	incomplete-splice_match	0.25	0.25	0	0.25	0	0.25	0	0	0.0588235	0.294118	0.294118	0	0	0.352941	0	0	['ast', 'ex', 'mic', 'oli']	['ast', 'ex', 'inh', 'oli']
4764	EIF3K	full-splice_match	0	0.6	0	0	0	0.4	0	0	0.133333	0.4	0	0	0.0666667	0.4	0	0	['ex', 'oli']	['ast', 'ex', 'opc', 'oli']
4770	EIF3K	full-splice_match	0.0573477	0.222222	0.0860215	0.0286738	0.0394265	0.548387	0	0.0179211	0.0470297	0.148515	0.0866337	0.029703	0.0569307	0.626238	0	0.0049505	['ast', 'ex', 'inh', 'oli']	['ex', 'inh', 'opc', 'oli']
4773	EIF3K	full-splice_match	0	1	0	0	0	0	0	0	0.2	0.2	0.2	0	0	0.4	0	0	['ex']	['ast', 'ex', 'inh', 'oli']
4775	EIF3K	incomplete-splice_match	0	0.5	0	0	0.5	0	0	0	0.2	0.4	0.2	0	0	0.2	0	0	['ex', 'opc']	['ast', 'ex', 'inh', 'oli']
4779	EIF3K	novel_in_catalog	0	0.181818	0.181818	0	0	0.636364	0	0	0.0555556	0.0555556	0.0555556	0	0.0555556	0.777778	0	0	['ex', 'inh', 'oli']	['ast', 'ex', 'inh', 'opc', 'oli']
4784	EIF3K	incomplete-splice_match	0.102564	0.666667	0.102564	0	0.025641	0.102564	0	0	0.0714286	0.571429	0.0952381	0.0238095	0.0238095	0.214286	0	0	['ast', 'ex', 'inh', 'oli']	['ast', 'ex', 'inh', 'oli']
4786	ACTN4	incomplete-splice_match	0	0.2	0	0.0666667	0	0.666667	0	0.0666667	0.0555556	0	0	0	0.0555556	0.888889	0	0	['ex', 'end', 'mic', 'oli']	['ast', 'opc', 'oli']
4797	ECH1	full-splice_match	0.0852941	0.2	0.0647059	0.0147059	0.0411765	0.591176	0	0.00294118	0.0315789	0.136842	0.136842	0.0175439	0.0315789	0.642105	0	0.00350877	['ast', 'ex', 'inh', 'oli']	['ex', 'inh', 'oli']
4802	HNRNPL	incomplete-splice_match	0.0833333	0.166667	0.166667	0.0833333	0	0.5	0	0	0.0666667	0.0666667	0.133333	0	0.133333	0.6	0	0	['ast', 'ex', 'inh', 'mic', 'oli']	['ast', 'ex', 'inh', 'opc', 'oli']
4805	HNRNPL	full-splice_match	0.032	0.176	0.104	0.008	0.048	0.632	0	0	0.0273973	0.30137	0.246575	0	0.0273973	0.383562	0	0.0136986	['ex', 'inh', 'oli']	['ex', 'inh', 'oli']
4809	RINL	incomplete-splice_match	0	0.666667	0	0	0	0.333333	0	0	0	0.8	0.2	0	0	0	0	0	['ex', 'oli']	['ex', 'inh']
4812	SIRT2	full-splice_match	0.0281313	0.103818	0.0274615	0.00334896	0.038848	0.797723	0.000669792	0	0.0233184	0.163229	0.0511211	0.00986547	0.032287	0.720179	0	0	['ex', 'oli']	['ex', 'inh', 'oli']
4814	SIRT2	incomplete-splice_match	0	0.142857	0	0	0	0.857143	0	0	0	0	0.333333	0	0.333333	0.333333	0	0	['ex', 'oli']	['inh', 'opc', 'oli']
4828	NFKBIB	full-splice_match	0.0333333	0.0333333	0	0.0333333	0.0333333	0.866667	0	0	0.0294118	0.117647	0.147059	0.0294118	0.0882353	0.588235	0	0	['oli']	['ex', 'inh', 'opc', 'oli']
4829	CCER2	full-splice_match	0	0	0	0	0	1	0	0	0	0.285714	0.428571	0	0	0.285714	0	0	['oli']	['ex', 'inh', 'oli']
4832	SARS2	incomplete-splice_match	0	0.25	0.25	0	0	0.5	0	0	0.0645161	0.548387	0.290323	0	0	0.0967742	0	0	['ex', 'inh', 'oli']	['ast', 'ex', 'inh', 'oli']
4833	SARS2	incomplete-splice_match	0	0.2	0.6	0	0	0.2	0	0	0	0.25	0.75	0	0	0	0	0	['ex', 'inh', 'oli']	['ex', 'inh']
4838	MRPS12	full-splice_match	0.0601504	0.12782	0.0977444	0.0300752	0.037594	0.631579	0	0.0150376	0.046875	0.148438	0.164062	0.0625	0.03125	0.546875	0	0	['ast', 'ex', 'inh', 'oli']	['ex', 'inh', 'mic', 'oli']
4840	MRPS12	full-splice_match	0.0625	0.375	0.125	0.0625	0	0.375	0	0									['ast', 'ex', 'inh', 'mic', 'oli']	[]
4847	OLA1P1	full-splice_match	0	0.714286	0.142857	0	0	0.142857	0	0	0	1	0	0	0	0	0	0	['ex', 'inh', 'oli']	['ex']
4859	INO80D-AS1	full-splice_match	0.09375	0	0.03125	0.03125	0.0625	0.78125	0	0	0.166667	0.138889	0.111111	0.0277778	0.0277778	0.527778	0	0	['ast', 'opc', 'oli']	['ast', 'ex', 'inh', 'oli']
4862	EEF1B2	full-splice_match	0.02	0	0	0.08	0.08	0.8	0	0.02	0.0431034	0.12069	0.0517241	0.137931	0.0344828	0.594828	0	0.0172414	['mic', 'opc', 'oli']	['ex', 'inh', 'mic', 'oli']
4864	EEF1B2	full-splice_match	0.0857143	0	0.0285714	0.114286	0	0.771429	0	0	0.039604	0.425743	0.0792079	0.019802	0.039604	0.39604	0	0	['ast', 'mic', 'oli']	['ex', 'inh', 'oli']
4865	EEF1B2	full-splice_match	0.0322581	0.26129	0.0774194	0.0645161	0.0129032	0.532258	0.00322581	0.016129	0.0138504	0.160665	0.108033	0.0858726	0.033241	0.595568	0.00277008	0	['ex', 'inh', 'mic', 'oli']	['ex', 'inh', 'mic', 'oli']
4870	EEF1B2	full-splice_match	0	0.318182	0.181818	0.136364	0	0.363636	0	0	0.0322581	0.129032	0.0967742	0.129032	0.129032	0.483871	0	0	['ex', 'inh', 'mic', 'oli']	['ex', 'inh', 'mic', 'opc', 'oli']
4871	EEF1B2	incomplete-splice_match	0.103448	0.172414	0.0344828	0.103448	0.0344828	0.482759	0	0.0689655	0	0.25	0.125	0.208333	0	0.416667	0	0	['ast', 'ex', 'end', 'mic', 'oli']	['ex', 'inh', 'mic', 'oli']
4872	EEF1B2	incomplete-splice_match	0.2	0	0	0	0	0.8	0	0	0.166667	0.333333	0	0.166667	0	0.333333	0	0	['ast', 'oli']	['ast', 'ex', 'mic', 'oli']
4878	EEF1B2	full-splice_match	0.1	0.3	0	0	0	0.6	0	0	0	0.333333	0.666667	0	0	0	0	0	['ast', 'ex', 'oli']	['ex', 'inh']
4879	ZDBF2	incomplete-splice_match	0	0.6	0.4	0	0	0	0	0	0	0.375	0.5	0	0.125	0	0	0	['ex', 'inh']	['ex', 'inh', 'opc']
4903	NDUFS1	incomplete-splice_match	0.136364	0.159091	0.113636	0.0454545	0	0.545455	0	0	0.0833333	0.291667	0.25	0.0416667	0	0.333333	0	0	['ast', 'ex', 'inh', 'oli']	['ast', 'ex', 'inh', 'oli']
4904	NDUFS1	incomplete-splice_match	0.0833333	0	0.0833333	0.0833333	0	0.75	0	0	0.111111	0.611111	0.166667	0	0	0.111111	0	0	['ast', 'inh', 'mic', 'oli']	['ast', 'ex', 'inh', 'oli']
4906	NDUFS1	incomplete-splice_match	0	0.230769	0.0769231	0.0769231	0	0.615385	0	0	0.117647	0.411765	0.215686	0.0196078	0	0.235294	0	0	['ex', 'inh', 'mic', 'oli']	['ast', 'ex', 'inh', 'oli']
4907	NDUFS1	incomplete-splice_match	0	0	0.25	0	0	0.75	0	0	0	0.333333	0.333333	0	0	0.333333	0	0	['inh', 'oli']	['ex', 'inh', 'oli']
4912	FRG1	incomplete-splice_match	0	0	0	0	0	1	0	0	0	0.142857	0.0714286	0	0.0714286	0.714286	0	0	['oli']	['ex', 'inh', 'opc', 'oli']
4913	FRG1	full-splice_match	0.0357143	0.107143	0.0357143	0.0714286	0.0357143	0.714286	0	0	0.0212766	0.0851064	0.0851064	0.0212766	0.0212766	0.723404	0	0.0425532	['ex', 'mic', 'oli']	['ex', 'inh', 'oli']
4914	FRG1	incomplete-splice_match	0	0	0	0	0	1	0	0	0	0.0833333	0.0833333	0	0.0833333	0.75	0	0	['oli']	['ex', 'inh', 'opc', 'oli']
4918	FRG1	full-splice_match	0.0181818	0.0909091	0	0.0363636	0.0909091	0.763636	0	0	0.03125	0	0.0625	0	0	0.90625	0	0	['ex', 'opc', 'oli']	['inh', 'oli']
4939	ENSG00000284072	full-splice_match	0.1	0.1	0.1	0	0	0.7	0	0	0.181818	0.0909091	0.181818	0	0.181818	0.363636	0	0	['ast', 'ex', 'inh', 'oli']	['ast', 'ex', 'inh', 'opc', 'oli']
4945	CANX	incomplete-splice_match	0.0909091	0.0909091	0	0	0	0.818182	0	0	0.103448	0.0344828	0.0344828	0	0.0344828	0.758621	0	0.0344828	['ast', 'ex', 'oli']	['ast', 'oli']
4948	CANX	incomplete-splice_match	0	0.32	0.04	0.04	0.04	0.56	0	0	0.0731707	0.0487805	0.0243902	0.0731707	0.097561	0.682927	0	0	['ex', 'oli']	['ast', 'mic', 'opc', 'oli']
4953	CANX	incomplete-splice_match	0.16129	0.0645161	0	0	0.16129	0.580645	0	0.0322581	0.135135	0.108108	0.0540541	0.0540541	0.0810811	0.567568	0	0	['ast', 'ex', 'opc', 'oli']	['ast', 'ex', 'inh', 'mic', 'opc', 'oli']
4957	CANX	incomplete-splice_match	0.0945946	0.0472973	0.0540541	0.0337838	0.0472973	0.716216	0	0.00675676	0	0.357143	0.142857	0.0714286	0	0.428571	0	0	['ast', 'inh', 'oli']	['ex', 'inh', 'mic', 'oli']
4962	PRDX2P3	full-splice_match	0	0.571429	0.142857	0	0	0.285714	0	0	0	0	0	0.5	0	0.5	0	0	['ex', 'inh', 'oli']	['mic', 'oli']
4976	HNRNPH1	full-splice_match	0.384615	0	0	0.153846	0	0.461538	0	0	0.235294	0.176471	0	0.235294	0	0.352941	0	0	['ast', 'mic', 'oli']	['ast', 'ex', 'mic', 'oli']
4979	HNRNPH1	incomplete-splice_match	0	0.0714286	0.142857	0.0714286	0.142857	0.571429	0	0	0.214286	0.0714286	0.0714286	0.142857	0	0.5	0	0	['ex', 'inh', 'mic', 'opc', 'oli']	['ast', 'ex', 'inh', 'mic', 'oli']
4982	LTC4S	full-splice_match	0	0.333333	0.166667	0.416667	0	0.0833333	0	0	0	0.1	0.0333333	0.8	0	0.0666667	0	0	['ex', 'inh', 'mic', 'oli']	['ex', 'mic', 'oli']
4994	SQSTM1	novel_not_in_catalog	0	0.75	0	0	0	0.25	0	0	0	0	1	0	0	0	0	0	['ex', 'oli']	['inh']
4998	SQSTM1	incomplete-splice_match	0.0687023	0.119593	0.0356234	0.00763359	0.0279898	0.725191	0	0.0152672	0.0861244	0.136364	0.0526316	0.0167464	0.0263158	0.679426	0	0.00239234	['ast', 'ex', 'oli']	['ast', 'ex', 'inh', 'oli']
4999	SQSTM1	full-splice_match	0.0479705	0.225092	0.0885609	0	0.0147601	0.619926	0	0.00369004	0.0818182	0.345455	0.131818	0.00909091	0.00454545	0.427273	0	0	['ex', 'inh', 'oli']	['ast', 'ex', 'inh', 'oli']
5002	SQSTM1	incomplete-splice_match	0	0.166667	0	0	0	0.833333	0	0	0.0833333	0.333333	0.0833333	0	0	0.5	0	0	['ex', 'oli']	['ast', 'ex', 'inh', 'oli']
5009	SQSTM1	incomplete-splice_match	0.5	0	0.5	0	0	0	0	0	0.0140845	0.535211	0.15493	0.0422535	0.028169	0.225352	0	0	['ast', 'inh']	['ex', 'inh', 'oli']
5010	SQSTM1	incomplete-splice_match	0	0	0.5	0	0	0.5	0	0	0	0.813333	0.146667	0	0	0.04	0	0	['inh', 'oli']	['ex', 'inh']
5015	SQSTM1	novel_not_in_catalog	0	0.25	0.125	0	0.125	0.5	0	0	0	0.214286	0.285714	0	0	0.5	0	0	['ex', 'inh', 'opc', 'oli']	['ex', 'inh', 'oli']
5017	MRNIP-DT	full-splice_match	0	0.2	0	0	0.2	0.6	0	0	0.157895	0.105263	0.105263	0	0	0.631579	0	0	['ex', 'opc', 'oli']	['ast', 'ex', 'inh', 'oli']
5021	MRNIP	incomplete-splice_match	0.0769231	0.153846	0.230769	0	0	0.538462	0	0	0.210526	0.210526	0.105263	0	0.0526316	0.421053	0	0	['ast', 'ex', 'inh', 'oli']	['ast', 'ex', 'inh', 'opc', 'oli']
5022	MRNIP	full-splice_match	0.133333	0	0.166667	0	0.0666667	0.633333	0	0	0.0238095	0.380952	0.357143	0.0238095	0.047619	0.166667	0	0	['ast', 'inh', 'opc', 'oli']	['ex', 'inh', 'oli']
5024	MRNIP	full-splice_match	0.166667	0	0.333333	0.25	0	0.25	0	0	0.125	0.125	0	0	0	0.75	0	0	['ast', 'inh', 'mic', 'oli']	['ast', 'ex', 'oli']
5034	TMEM256	novel_in_catalog	0.0666667	0.2	0	0	0.133333	0.6	0	0	0.142857	0.714286	0	0	0	0.142857	0	0	['ast', 'ex', 'opc', 'oli']	['ast', 'ex', 'oli']
5040	TMEM256	full-splice_match	0.0165975	0.0746888	0.0414938	0.0165975	0.0207469	0.825726	0	0.00414938	0.0325733	0.0781759	0.0423453	0.0130293	0.0390879	0.794788	0	0	['ex', 'oli']	['ex', 'oli']
5041	TMEM256	novel_in_catalog	0	0.25	0	0	0	0.75	0	0	0.0952381	0.0952381	0.142857	0	0.047619	0.619048	0	0	['ex', 'oli']	['ast', 'ex', 'inh', 'oli']
5042	TMEM256	novel_not_in_catalog	0	0	0	0	0	1	0	0	0	0.0909091	0.0909091	0	0	0.818182	0	0	['oli']	['ex', 'inh', 'oli']
5043	TMEM256	novel_not_in_catalog	0	0	0	0	0	1	0	0	0	0	0	0	0	1	0	0	['oli']	['oli']
5046	CHRNB1	full-splice_match	0.222222	0.0888889	0.0444444	0	0.0444444	0.6	0	0	0.117647	0.176471	0.0588235	0	0	0.647059	0	0	['ast', 'ex', 'oli']	['ast', 'ex', 'inh', 'oli']
5048	POLR2A	incomplete-splice_match	0.142857	0.285714	0	0	0	0.571429	0	0	0	0.25	0	0	0	0.75	0	0	['ast', 'ex', 'oli']	['ex', 'oli']
5057	PLCL2	incomplete-splice_match	0	0.272727	0.181818	0.0909091	0	0.454545	0	0	0	0.25	0.0833333	0.166667	0.0833333	0.416667	0	0	['ex', 'inh', 'mic', 'oli']	['ex', 'inh', 'mic', 'opc', 'oli']
5067	CASP8AP2	incomplete-splice_match	0.25	0.5	0.125	0.125	0	0	0	0	0.125	0.125	0.375	0	0	0.375	0	0	['ast', 'ex', 'inh', 'mic']	['ast', 'ex', 'inh', 'oli']
5069	CASP8AP2	incomplete-splice_match	0.0454545	0.272727	0.0681818	0	0	0.590909	0.0227273	0	0.0909091	0.363636	0.0454545	0	0.136364	0.363636	0	0	['ex', 'inh', 'oli']	['ast', 'ex', 'opc', 'oli']
5070	C17orf97	full-splice_match	0	0.666667	0.166667	0	0	0.166667	0	0	0	0.4	0.4	0	0	0.2	0	0	['ex', 'inh', 'oli']	['ex', 'inh', 'oli']
5072	C17orf97	novel_in_catalog	0	0.594595	0.324324	0.027027	0.027027	0.027027	0	0	0.0769231	0.461538	0.307692	0	0	0.153846	0	0	['ex', 'inh']	['ast', 'ex', 'inh', 'oli']
5083	VPS53	full-splice_match	0.0526316	0.263158	0.210526	0	0.105263	0.368421	0	0	0.0714286	0.714286	0.0714286	0	0	0.142857	0	0	['ast', 'ex', 'inh', 'opc', 'oli']	['ast', 'ex', 'inh', 'oli']
5085	VPS53	incomplete-splice_match	0.0833333	0.583333	0.0833333	0.0833333	0	0.166667	0	0	0.2	0	0.4	0	0	0.4	0	0	['ast', 'ex', 'inh', 'mic', 'oli']	['ast', 'inh', 'oli']
5094	ENSG00000284449	full-splice_match	0.0714286	0.5	0.142857	0	0	0.285714	0	0	0	0.6	0.2	0	0	0.2	0	0	['ast', 'ex', 'inh', 'oli']	['ex', 'inh', 'oli']
5098	TOP3A	full-splice_match	0.06	0.36	0.1	0.1	0.06	0.32	0	0	0.0163934	0.409836	0.163934	0.0163934	0.0327869	0.360656	0	0	['ast', 'ex', 'inh', 'mic', 'opc', 'oli']	['ex', 'inh', 'oli']
5103	ENSG00000290637	full-splice_match	0	1	0	0	0	0	0	0	0	1	0	0	0	0	0	0	['ex']	['ex']
5104	ENSG00000284319	full-splice_match	0	0.333333	0	0	0	0.666667	0	0	0	0.166667	0	0	0.333333	0.5	0	0	['ex', 'oli']	['ex', 'opc', 'oli']
5106	SLC25A24	incomplete-splice_match	0.285714	0.285714	0.142857	0.142857	0	0.142857	0	0	0	0.35	0.1	0	0.15	0.4	0	0	['ast', 'ex', 'inh', 'mic', 'oli']	['ex', 'inh', 'opc', 'oli']
5107	SLC25A24	full-splice_match	0.25	0.25	0	0	0.25	0.25	0	0	0	0.5	0	0.25	0	0.25	0	0	['ast', 'ex', 'opc', 'oli']	['ex', 'mic', 'oli']
5115	HBP1	incomplete-splice_match	0	0.142857	0	0	0	0.857143	0	0	0.125	0	0.125	0	0	0.75	0	0	['ex', 'oli']	['ast', 'inh', 'oli']
5117	HBP1	incomplete-splice_match	0.1	0.025	0.1	0.025	0.075	0.675	0	0	0.15	0.3	0.05	0	0	0.5	0	0	['ast', 'inh', 'opc', 'oli']	['ast', 'ex', 'inh', 'oli']
5121	HBP1	incomplete-splice_match	0	0.538462	0	0	0	0.461538	0	0	0	0.2	0.1	0	0.1	0.6	0	0	['ex', 'oli']	['ex', 'inh', 'opc', 'oli']
5122	GPR22	full-splice_match	0	0.782609	0.173913	0	0	0.0434783	0	0	0.0149254	0.731343	0.238806	0	0.0149254	0	0	0	['ex', 'inh']	['ex', 'inh']
5124	GPR22	full-splice_match	0	0.2	0.6	0	0	0.2	0	0	0	0.833333	0.111111	0	0	0.0555556	0	0	['ex', 'inh', 'oli']	['ex', 'inh', 'oli']
5131	COG5	incomplete-splice_match	0.0909091	0.363636	0.181818	0.0454545	0	0.318182	0	0	0.125	0.5	0.25	0	0	0.125	0	0	['ast', 'ex', 'inh', 'oli']	['ast', 'ex', 'inh', 'oli']
5132	COG5	incomplete-splice_match	0.133333	0.4	0	0	0.133333	0.333333	0	0	0	0.125	0.375	0.0625	0	0.4375	0	0	['ast', 'ex', 'opc', 'oli']	['ex', 'inh', 'mic', 'oli']
5133	COG5	incomplete-splice_match	0.190476	0.333333	0.142857	0.047619	0	0.285714	0	0	0.0909091	0.272727	0.181818	0.181818	0	0.272727	0	0	['ast', 'ex', 'inh', 'oli']	['ast', 'ex', 'inh', 'mic', 'oli']
5141	DUS4L	full-splice_match	0	0.285714	0.285714	0	0.142857	0.285714	0	0	0	0.444444	0.333333	0	0	0.222222	0	0	['ex', 'inh', 'opc', 'oli']	['ex', 'inh', 'oli']
5143	DUS4L	incomplete-splice_match	0.0769231	0.153846	0.230769	0	0.0769231	0.461538	0	0	0.111111	0.277778	0.111111	0	0	0.5	0	0	['ast', 'ex', 'inh', 'opc', 'oli']	['ast', 'ex', 'inh', 'oli']
5148	BCAP29	novel_not_in_catalog	0.25	0.75	0	0	0	0	0	0	0	0.4	0	0	0	0.6	0	0	['ast', 'ex']	['ex', 'oli']
5149	BCAP29	novel_not_in_catalog	0.0285714	0.4	0.142857	0	0.0285714	0.4	0	0	0.0265487	0.327434	0.19469	0.0176991	0.0442478	0.389381	0	0	['ex', 'inh', 'oli']	['ex', 'inh', 'oli']
5151	BCAP29	novel_not_in_catalog	0	0.666667	0.333333	0	0	0	0	0	0	0.571429	0.285714	0.0714286	0	0.0714286	0	0	['ex', 'inh']	['ex', 'inh', 'mic', 'oli']
5152	BCAP29	novel_not_in_catalog	0	0.2	0.2	0	0	0.5	0.1	0	0.0714286	0.134921	0.190476	0.047619	0.031746	0.515873	0.00793651	0	['ex', 'inh', 'oli', 'per']	['ast', 'ex', 'inh', 'oli']
5154	BCAP29	novel_not_in_catalog	0.0416667	0.375	0.25	0.0416667	0.0416667	0.25	0	0	0.0217391	0.391304	0.26087	0.0217391	0.0434783	0.26087	0	0	['ex', 'inh', 'oli']	['ex', 'inh', 'oli']
5155	BCAP29	novel_not_in_catalog	0.03125	0.5	0.09375	0.03125	0.09375	0.25	0	0	0	0	0	0	0.142857	0.857143	0	0	['ex', 'inh', 'opc', 'oli']	['opc', 'oli']
5157	BCAP29	novel_not_in_catalog	0	0	0	0	0	1	0	0	0	0.2	0.2	0	0.2	0.4	0	0	['oli']	['ex', 'inh', 'opc', 'oli']
5162	ENSG00000284582	full-splice_match	0.148148	0.407407	0.185185	0	0	0.259259	0	0	0.0909091	0.363636	0.136364	0	0.0454545	0.363636	0	0	['ast', 'ex', 'inh', 'oli']	['ast', 'ex', 'inh', 'oli']
5231	POLR3E	incomplete-splice_match	0.102041	0.102041	0.102041	0.0204082	0.122449	0.55102	0	0	0.0677966	0.288136	0.169492	0.0338983	0.0169492	0.423729	0	0	['ast', 'ex', 'inh', 'opc', 'oli']	['ast', 'ex', 'inh', 'oli']
5241	MOSMO	novel_not_in_catalog	0.0648148	0.5	0.138889	0.00925926	0.0185185	0.268519	0	0	0.0266667	0.493333	0.213333	0.0133333	0.0266667	0.226667	0	0	['ast', 'ex', 'inh', 'oli']	['ex', 'inh', 'oli']
5242	MOSMO	novel_not_in_catalog	0.125	0.375	0.125	0.125	0	0.25	0	0	0	0.5	0	0	0	0.5	0	0	['ast', 'ex', 'inh', 'mic', 'oli']	['ex', 'oli']
5243	ENSG00000284493	novel_not_in_catalog	0.119318	0.227273	0.130682	0.0284091	0.0568182	0.4375	0	0	0.0699301	0.160839	0.13986	0.013986	0.0699301	0.538462	0	0.00699301	['ast', 'ex', 'inh', 'opc', 'oli']	['ast', 'ex', 'inh', 'opc', 'oli']
5249	ENSG00000284493	novel_not_in_catalog	0.142857	0.428571	0.0714286	0	0	0.357143	0	0	0.25	0.166667	0.0833333	0.0833333	0	0.416667	0	0	['ast', 'ex', 'inh', 'oli']	['ast', 'ex', 'inh', 'mic', 'oli']
5256	ENSG00000284493	novel_not_in_catalog	0.111111	0.333333	0.111111	0	0	0.444444	0	0	0	0.3125	0.1875	0	0.0625	0.4375	0	0	['ast', 'ex', 'inh', 'oli']	['ex', 'inh', 'opc', 'oli']
5264	ENSG00000284559	incomplete-splice_match	0	1	0	0	0	0	0	0	0	0.5	0.5	0	0	0	0	0	['ex']	['ex', 'inh']
5266	METTL9	novel_not_in_catalog	0.0512821	0	0.0512821	0.0512821	0.025641	0.794872	0.025641	0	0.0909091	0.181818	0.0454545	0.136364	0.0909091	0.454545	0	0	['ast', 'inh', 'mic', 'oli']	['ast', 'ex', 'mic', 'opc', 'oli']
5270	METTL9	incomplete-splice_match	0.0384615	0.192308	0.5	0	0	0.269231	0	0	0	0.315789	0.438596	0.0175439	0	0.22807	0	0	['ex', 'inh', 'oli']	['ex', 'inh', 'oli']
5275	METTL9	incomplete-splice_match	0	0.5	0.333333	0.166667	0	0	0	0	0.125	0.625	0	0	0.125	0.125	0	0	['ex', 'inh', 'mic']	['ast', 'ex', 'opc', 'oli']
5317	novelGene_ENSG00000283826_AS	antisense	0	0.25	0	0.0833333	0.0833333	0.416667	0	0.166667	0	0.411765	0.235294	0	0	0.352941	0	0	['ex', 'end', 'mic', 'opc', 'oli']	['ex', 'inh', 'oli']
5330	ATP5IF1	full-splice_match	0.0385321	0.465138	0.157798	0.0174312	0.0192661	0.294495	0.00275229	0.00458716	0.0284392	0.356481	0.183862	0.0145503	0.0257937	0.38955	0	0.00132275	['ex', 'inh', 'oli']	['ex', 'inh', 'oli']
5332	ATP5IF1	full-splice_match	0.0253165	0.240506	0.189873	0	0.0379747	0.506329	0	0	0.038835	0.31068	0.174757	0.0194175	0.038835	0.417476	0	0	['ex', 'inh', 'oli']	['ex', 'inh', 'oli']
5352	H2AC25	full-splice_match	0.00434783	0.404348	0.173913	0.0391304	0.00869565	0.369565	0	0	0.00510204	0.387755	0.158163	0.0561224	0.0153061	0.377551	0	0	['ex', 'inh', 'oli']	['ex', 'inh', 'mic', 'oli']
5353	H2BC26	full-splice_match	0	0.619048	0.142857	0.0952381	0	0.142857	0	0	0	0.5	0.272727	0.136364	0	0.0909091	0	0	['ex', 'inh', 'mic', 'oli']	['ex', 'inh', 'mic', 'oli']
5354	RNF187	incomplete-splice_match	0	0.166667	0.5	0	0	0.333333	0	0	0	0.4	0.2	0	0.1	0.3	0	0	['ex', 'inh', 'oli']	['ex', 'inh', 'opc', 'oli']
5355	RNF187	incomplete-splice_match	0.25	0.125	0.125	0	0	0.5	0	0	0	0.333333	0.166667	0	0	0.5	0	0	['ast', 'ex', 'inh', 'oli']	['ex', 'inh', 'oli']
5356	RNF187	full-splice_match	0.0169492	0.59322	0.124294	0.00753296	0.0207156	0.233522	0	0.00376648	0.0202312	0.604046	0.216763	0	0.017341	0.141618	0	0	['ex', 'inh', 'oli']	['ex', 'inh', 'oli']
5362	RHOU	novel_in_catalog	0.0192308	0	0	0	0.0192308	0.961538	0	0	0.0285714	0	0	0	0.0285714	0.942857	0	0	['oli']	['oli']
5363	RHOU	full-splice_match	0.0193548	0.00645161	0.00645161	0	0.0322581	0.929032	0	0.00645161	0.0179641	0	0	0.00598802	0.0239521	0.952096	0	0	['oli']	['oli']
5365	CRYGD	full-splice_match	0	0	1	0	0	0	0	0	0	0.5	0.5	0	0	0	0	0	['inh']	['ex', 'inh']
5374	PAK1IP1	incomplete-splice_match	0.28	0.28	0.08	0.04	0.04	0.24	0.04	0	0.178571	0.0714286	0.178571	0	0.0357143	0.535714	0	0	['ast', 'ex', 'inh', 'oli']	['ast', 'ex', 'inh', 'oli']
5375	PAK1IP1	incomplete-splice_match	0	0.142857	0	0	0	0.857143	0	0	0	0	0	0	0.5	0.5	0	0	['ex', 'oli']	['opc', 'oli']
5380	TMEM14C	full-splice_match	0.109541	0.159011	0.0565371	0.024735	0.0282686	0.621908	0	0	0.0714286	0.164596	0.111801	0.0186335	0.0310559	0.596273	0.00310559	0.00310559	['ast', 'ex', 'inh', 'oli']	['ast', 'ex', 'inh', 'oli']
5382	TMEM14C	incomplete-splice_match	0	0	0	0	1	0	0	0	0.142857	0.142857	0.428571	0	0	0.285714	0	0	['opc']	['ast', 'ex', 'inh', 'oli']
5383	TMEM14C	novel_in_catalog	0	0	0.0666667	0	0	0.933333	0	0	0.148148	0.0740741	0.037037	0	0.037037	0.703704	0	0	['inh', 'oli']	['ast', 'ex', 'oli']
5399	novelGene_ENSG00000285277_AS	antisense	0	1	0	0	0	0	0	0	0	0.666667	0	0	0	0.333333	0	0	['ex']	['ex', 'oli']
5427	FBXL6	full-splice_match	0.0454545	0.693182	0.147727	0.0227273	0.0227273	0.0454545	0	0.0227273	0	0.5	0	0	0.5	0	0	0	['ex', 'inh']	['ex', 'opc']
5428	SLC52A2	full-splice_match	0.342105	0.105263	0.210526	0.0263158	0.0526316	0.263158	0	0	0.0909091	0	0	0.0454545	0.0909091	0.772727	0	0	['ast', 'ex', 'inh', 'opc', 'oli']	['ast', 'opc', 'oli']
5432	CPSF1	incomplete-splice_match	0.0547945	0.767123	0.136986	0	0	0.0410959	0	0	0.108108	0.621622	0.135135	0	0.0540541	0.0810811	0	0	['ast', 'ex', 'inh']	['ast', 'ex', 'inh', 'opc', 'oli']
5436	ENSG00000284888	full-splice_match	0.142857	0	0.142857	0	0	0.714286	0	0	0	0.272727	0.181818	0.0909091	0	0.454545	0	0	['ast', 'inh', 'oli']	['ex', 'inh', 'mic', 'oli']
5437	SLC39A4	full-splice_match	0	0.5	0.166667	0.166667	0.0833333	0	0	0.0833333	0	0.75	0	0.25	0	0	0	0	['ex', 'end', 'inh', 'mic', 'opc']	['ex', 'mic']
5438	SLC39A4	incomplete-splice_match	0	0	0.333333	0	0	0.666667	0	0	0.5	0	0.5	0	0	0	0	0	['inh', 'oli']	['ast', 'inh']
5440	VPS28	full-splice_match	0.0760095	0.118765	0.0712589	0.0285036	0.0498812	0.655582	0	0	0.0545455	0.11405	0.107438	0.0198347	0.0479339	0.649587	0	0.00661157	['ast', 'ex', 'inh', 'oli']	['ast', 'ex', 'inh', 'oli']
5444	VPS28	full-splice_match	0.0463918	0.273196	0.0979381	0.0154639	0.0206186	0.541237	0	0.00515464	0.0612245	0.102041	0.142857	0.0204082	0.0612245	0.612245	0	0	['ex', 'inh', 'oli']	['ast', 'ex', 'inh', 'opc', 'oli']
5447	VPS28	novel_in_catalog	0.3	0.5	0.1	0	0	0.1	0	0	0	0	0.5	0	0	0.5	0	0	['ast', 'ex', 'inh', 'oli']	['inh', 'oli']
5448	VPS28	novel_not_in_catalog	0.125	0.125	0	0	0	0.75	0	0	0	0.649123	0.22807	0.0175439	0	0.105263	0	0	['ast', 'ex', 'oli']	['ex', 'inh', 'oli']
5452	VPS28	full-splice_match	0.0769231	0	0.0769231	0.0769231	0	0.769231	0	0	0.111111	0.111111	0.111111	0	0	0.666667	0	0	['ast', 'inh', 'mic', 'oli']	['ast', 'ex', 'inh', 'oli']
5459	VPS28	novel_in_catalog	0.09375	0.5	0.0625	0.03125	0	0.3125	0	0	0.0833333	0.486111	0.173611	0.00694444	0.0347222	0.215278	0	0	['ast', 'ex', 'inh', 'oli']	['ast', 'ex', 'inh', 'oli']
5492	VPS28	novel_not_in_catalog	0	0.5	0	0	0.25	0.25	0	0	0	0.285714	0.142857	0	0.142857	0.428571	0	0	['ex', 'opc', 'oli']	['ex', 'inh', 'opc', 'oli']
5507	MIR124-1HG	full-splice_match	0.00256849	0.644692	0.331336	0.00256849	0.0136986	0.00428082	0	0.000856164	0.00101112	0.599596	0.35996	0	0.0252781	0.0141557	0	0	['ex', 'inh']	['ex', 'inh']
5509	MIR124-1HG	full-splice_match	0.00531915	0.755319	0.228723	0	0.0106383	0	0	0	0.00502513	0.61809	0.306533	0.00502513	0.040201	0.0251256	0	0	['ex', 'inh']	['ex', 'inh']
5510	MIR124-1HG	full-splice_match	0	0.303797	0.43038	0	0.240506	0.0126582	0	0.0126582	0.0333333	0.466667	0.4	0	0.1	0	0	0	['ex', 'inh', 'opc']	['ex', 'inh', 'opc']
5511	MIR124-1HG	full-splice_match	0	0.25	0.75	0	0	0	0	0	0	0.550725	0.434783	0	0	0.0144928	0	0	['ex', 'inh']	['ex', 'inh']
5512	MIR124-1HG	full-splice_match	0	0.833333	0.0833333	0	0.0833333	0	0	0	0	0.8	0.1	0.1	0	0	0	0	['ex', 'inh', 'opc']	['ex', 'inh', 'mic']
5521	MFHAS1	full-splice_match	0.0909091	0.636364	0.272727	0	0	0	0	0	0.230769	0.384615	0	0	0.0769231	0.307692	0	0	['ast', 'ex', 'inh']	['ast', 'ex', 'opc', 'oli']
5553	ENSG00000285349	novel_not_in_catalog	0.047619	0.666667	0.142857	0	0.0952381	0.047619	0	0	0.0869565	0.521739	0.26087	0	0.130435	0	0	0	['ex', 'inh', 'opc']	['ast', 'ex', 'inh', 'opc']
5556	DEFB131E	full-splice_match	0.133333	0.4	0.333333	0	0	0.133333	0	0	0.0769231	0.384615	0.461538	0	0	0.0769231	0	0	['ast', 'ex', 'inh', 'oli']	['ast', 'ex', 'inh', 'oli']
5558	CTSB	incomplete-splice_match	0	0.5	0.25	0	0	0.25	0	0	0.2	0.1	0.1	0.3	0	0.2	0.1	0	['ex', 'inh', 'oli']	['ast', 'ex', 'inh', 'mic', 'oli', 'per']
5564	CTSB	full-splice_match	0.264706	0.205882	0.117647	0.352941	0.0294118	0.0294118	0	0	0.113636	0.568182	0.113636	0.113636	0.0227273	0.0681818	0	0	['ast', 'ex', 'inh', 'mic']	['ast', 'ex', 'inh', 'mic', 'oli']
5576	AGPAT5	full-splice_match	0.0810811	0	0	0.0540541	0.108108	0.756757	0	0	0.444444	0	0.222222	0	0.111111	0.222222	0	0	['ast', 'mic', 'opc', 'oli']	['ast', 'inh', 'opc', 'oli']
5585	ENSG00000285276	full-splice_match	0.0434783	0.347826	0.304348	0.0434783	0.173913	0.0869565	0	0	0.0357143	0.678571	0.196429	0.0357143	0.0357143	0.0178571	0	0	['ex', 'inh', 'opc', 'oli']	['ex', 'inh']
5586	ENSG00000292292	full-splice_match	0.111111	0.444444	0.277778	0	0	0.166667	0	0	0	0.666667	0.296296	0	0	0.037037	0	0	['ast', 'ex', 'inh', 'oli']	['ex', 'inh']
5588	ENSG00000284801	full-splice_match	0.0645161	0.290323	0.419355	0	0.129032	0.0967742	0	0	0.0465116	0.488372	0.325581	0	0.0697674	0.0697674	0	0	['ast', 'ex', 'inh', 'opc', 'oli']	['ex', 'inh', 'opc', 'oli']
5592	ENSG00000285403	full-splice_match	0.0487805	0.634146	0.268293	0	0	0.0487805	0	0	0.0204082	0.632653	0.306122	0	0	0.0408163	0	0	['ex', 'inh']	['ex', 'inh']
5620	TNKS	incomplete-splice_match	0	0.666667	0	0	0.333333	0	0	0	0	0.25	0.25	0	0.25	0.25	0	0	['ex', 'opc']	['ex', 'inh', 'opc', 'oli']
5624	TNKS	incomplete-splice_match	0.0714286	0.0952381	0.0714286	0.047619	0	0.714286	0	0	0.08	0.08	0.12	0	0.12	0.56	0	0.04	['ast', 'ex', 'inh', 'oli']	['ast', 'ex', 'inh', 'opc', 'oli']
5625	TNKS	incomplete-splice_match	0	0.333333	0.333333	0	0.333333	0	0	0	0	0	0	0	0	1	0	0	['ex', 'inh', 'opc']	['oli']
5626	TNKS	full-splice_match	0	0.181818	0.181818	0	0.0909091	0.545455	0	0	0.1	0.3	0.2	0	0	0.4	0	0	['ex', 'inh', 'opc', 'oli']	['ast', 'ex', 'inh', 'oli']
5627	OR7E154P	full-splice_match	0.166667	0.166667	0	0	0	0.666667	0	0	0.08	0.44	0.2	0	0	0.28	0	0	['ast', 'ex', 'oli']	['ast', 'ex', 'inh', 'oli']
5629	ERI1	incomplete-splice_match	0	0.142857	0	0	0.142857	0.714286	0	0	0	0	0.125	0	0	0.875	0	0	['ex', 'opc', 'oli']	['inh', 'oli']
5635	MCPH1-AS1	full-splice_match	0	0	0	0	0	1	0	0	0.166667	0.166667	0.166667	0	0	0.5	0	0	['oli']	['ast', 'ex', 'inh', 'oli']
5640	RPS3AP34	full-splice_match	0	0.9	0	0.1	0	0	0	0	0.142857	0.714286	0.142857	0	0	0	0	0	['ex', 'mic']	['ast', 'ex', 'inh']
5641	ENSG00000284992	novel_not_in_catalog	0	0.466667	0.133333	0	0.333333	0.0666667	0	0	0.0555556	0.555556	0.277778	0	0.111111	0	0	0	['ex', 'inh', 'opc', 'oli']	['ast', 'ex', 'inh', 'opc']
5646	LONRF1	full-splice_match	0	0.666667	0	0	0	0.333333	0	0	0.0444444	0.511111	0.133333	0.0222222	0	0.288889	0	0	['ex', 'oli']	['ex', 'inh', 'oli']
5658	FDFT1	full-splice_match	0.0563063	0.045045	0.0315315	0.0045045	0.0292793	0.833333	0	0	0.0398936	0.0664894	0.0505319	0.0212766	0.0265957	0.795213	0	0	['ast', 'oli']	['ex', 'inh', 'oli']
5659	FDFT1	incomplete-splice_match	0.0461538	0	0	0	0.0153846	0.938462	0	0	0	0.833333	0.111111	0	0	0.0555556	0	0	['oli']	['ex', 'inh', 'oli']
5660	FDFT1	full-splice_match	0.0208333	0	0	0	0.0208333	0.958333	0	0	0	0.105263	0.0263158	0.0263158	0	0.842105	0	0	['oli']	['ex', 'oli']
5661	FDFT1	incomplete-splice_match	0.0674157	0.146067	0.0337079	0.011236	0.0449438	0.696629	0	0	0.0454545	0.295455	0.0909091	0.0227273	0	0.545455	0	0	['ast', 'ex', 'oli']	['ex', 'inh', 'oli']
5664	FDFT1	incomplete-splice_match	0.0833333	0.0833333	0.0833333	0	0	0.75	0	0	0	0.125	0.25	0	0	0.625	0	0	['ast', 'ex', 'inh', 'oli']	['ex', 'inh', 'oli']
5667	FDFT1	incomplete-splice_match	0	0.333333	0.166667	0	0.166667	0.333333	0	0	0	0.142857	0	0	0	0.857143	0	0	['ex', 'inh', 'opc', 'oli']	['ex', 'oli']
5671	SLC35G5	full-splice_match	0	1	0	0	0	0	0	0	0	0	0.333333	0	0.333333	0.333333	0	0	['ex']	['inh', 'opc', 'oli']
5675	MTMR9	incomplete-splice_match	0	0	0.2	0.2	0	0.6	0	0	0.166667	0.5	0	0	0	0.333333	0	0	['inh', 'mic', 'oli']	['ast', 'ex', 'oli']
5676	MTMR9	incomplete-splice_match	0	0	0	0	0.25	0.75	0	0	0	0.285714	0.142857	0	0.142857	0.428571	0	0	['opc', 'oli']	['ex', 'inh', 'opc', 'oli']
5684	ENSG00000285392	full-splice_match	0.168831	0.402597	0.168831	0.025974	0.0779221	0.155844	0	0	0.0522876	0.679739	0.196078	0	0.0326797	0.0392157	0	0	['ast', 'ex', 'inh', 'opc', 'oli']	['ast', 'ex', 'inh']
5688	ENSG00000292299	full-splice_match	0.076087	0.597826	0.228261	0.0108696	0.0434783	0.0434783	0	0	0.0642202	0.642202	0.174312	0.00917431	0.0550459	0.0550459	0	0	['ast', 'ex', 'inh']	['ast', 'ex', 'inh', 'opc', 'oli']
5690	MSRA	incomplete-splice_match	0	0.88	0.08	0	0	0.04	0	0	0.0666667	0.4	0.133333	0	0	0.4	0	0	['ex', 'inh']	['ast', 'ex', 'inh', 'oli']
5691	MSRA	full-splice_match	0.0350877	0.45614	0.122807	0.0701754	0	0.315789	0	0	0	0.384615	0.153846	0.0769231	0	0.346154	0	0.0384615	['ex', 'inh', 'mic', 'oli']	['ex', 'inh', 'mic', 'oli']
5694	MSRA	novel_not_in_catalog	0	0.75	0	0	0	0.25	0	0	0.0243902	0.853659	0.0731707	0	0.0487805	0	0	0	['ex', 'oli']	['ex', 'inh']
5701	MSRA	full-splice_match	0.25	0	0.75	0	0	0	0	0	0.0588235	0.352941	0.117647	0.117647	0	0.352941	0	0	['ast', 'inh']	['ast', 'ex', 'inh', 'mic', 'oli']
5706	MSRA	novel_not_in_catalog	0	0.666667	0	0	0	0.333333	0	0	0	1	0	0	0	0	0	0	['ex', 'oli']	['ex']
5716	ADIPOR2	novel_in_catalog	0.0243902	0.0487805	0.0731707	0	0	0.853659	0	0	0.0588235	0.0294118	0.0294118	0.0588235	0.0294118	0.794118	0	0	['inh', 'oli']	['ast', 'mic', 'oli']
5717	ADIPOR2	incomplete-splice_match	0	0	0	0.0740741	0	0.925926	0	0	0.05	0.1	0	0.05	0	0.8	0	0	['mic', 'oli']	['ast', 'ex', 'mic', 'oli']
5731	ADIPOR2	novel_in_catalog	0	0.0434783	0.0434783	0.0434783	0	0.869565	0	0	0	0.0666667	0	0.0666667	0.0666667	0.8	0	0	['oli']	['ex', 'mic', 'opc', 'oli']
5742	DCP1B	full-splice_match	0.0714286	0.5	0.142857	0	0	0.285714	0	0	0	0.363636	0.272727	0	0	0.363636	0	0	['ast', 'ex', 'inh', 'oli']	['ex', 'inh', 'oli']
5745	LINC00940	full-splice_match	0	0	0	0	0	1	0	0	0	0	0	0	0	1	0	0	['oli']	['oli']
5746	DCP1B	incomplete-splice_match	0.0952381	0.0952381	0	0.0952381	0	0.714286	0	0	0.166667	0.333333	0.333333	0	0	0.166667	0	0	['ast', 'ex', 'mic', 'oli']	['ast', 'ex', 'inh', 'oli']
5753	ENSG00000286673	novel_not_in_catalog	0	0.642857	0.142857	0	0.0714286	0.142857	0	0	0	0.72	0.2	0	0	0.08	0	0	['ex', 'inh', 'opc', 'oli']	['ex', 'inh', 'oli']
5754	DHRS4	full-splice_match	0.15	0	0	0.05	0.05	0.75	0	0	0.0294118	0.0588235	0	0.0294118	0	0.882353	0	0	['ast', 'mic', 'opc', 'oli']	['ex', 'oli']
5756	DHRS4L1	novel_in_catalog	0.333333	0.666667	0	0	0	0	0	0	0.166667	0	0.5	0	0.166667	0.166667	0	0	['ast', 'ex']	['ast', 'inh', 'opc', 'oli']
5758	DHRS4	full-splice_match	0.125	0.15	0.025	0.025	0.05	0.6	0	0.025	0	0.5	0	0	0.1	0.4	0	0	['ast', 'ex', 'opc', 'oli']	['ex', 'opc', 'oli']
5760	DHRS4	full-splice_match	0	0.0178571	0	0.0535714	0.107143	0.821429	0	0	0.0392157	0.215686	0.156863	0.0196078	0.0392157	0.529412	0	0	['mic', 'opc', 'oli']	['ex', 'inh', 'oli']
5773	DCAF11	incomplete-splice_match	0	0.6	0	0	0	0.4	0	0	0.2	0	0.2	0.2	0	0.4	0	0	['ex', 'oli']	['ast', 'inh', 'mic', 'oli']
5782	FITM1	full-splice_match	0.285714	0.428571	0.142857	0	0	0.142857	0	0	0.0714286	0.5	0.0714286	0	0	0.357143	0	0	['ast', 'ex', 'inh', 'oli']	['ast', 'ex', 'inh', 'oli']
5783	PSME1	full-splice_match	0.0200803	0.064257	0.0240964	0.0321285	0.0361446	0.811245	0.00401606	0.00803213	0.0413223	0.0702479	0.0413223	0.0826446	0.0578512	0.690083	0	0.0165289	['ex', 'oli']	['ex', 'mic', 'opc', 'oli']
5786	PSME1	incomplete-splice_match	0	0	0	0	0	0.75	0	0.25	0	0	0	0.5	0	0.5	0	0	['end', 'oli']	['mic', 'oli']
5792	PSME1	incomplete-splice_match	0.027027	0.135135	0.027027	0	0.027027	0.72973	0	0.0540541	0.0625	0.0416667	0.125	0.0625	0.0833333	0.625	0	0	['ex', 'end', 'oli']	['ast', 'inh', 'mic', 'opc', 'oli']
5796	PSME1	full-splice_match	0.1	0	0.05	0.05	0	0.8	0	0	0	0	0	0	0	1	0	0	['ast', 'inh', 'mic', 'oli']	['oli']
5799	EMC9	full-splice_match	0	0.483871	0.258065	0.0322581	0	0.193548	0	0.0322581	0.166667	0.111111	0.277778	0.111111	0	0.333333	0	0	['ex', 'inh', 'oli']	['ast', 'ex', 'inh', 'mic', 'oli']
5803	EMC9	incomplete-splice_match	0.0909091	0.454545	0.181818	0	0	0.272727	0	0	0.272727	0.0909091	0.363636	0	0	0.272727	0	0	['ast', 'ex', 'inh', 'oli']	['ast', 'ex', 'inh', 'oli']
5806	EMC9	full-splice_match	0	0	0.0909091	0	0	0.909091	0	0	0	0.333333	0.222222	0.111111	0	0.333333	0	0	['inh', 'oli']	['ex', 'inh', 'mic', 'oli']
5808	EMC9	novel_in_catalog	0	0.333333	0	0	0.166667	0.5	0	0	0	0.409091	0.454545	0	0.0454545	0.0909091	0	0	['ex', 'opc', 'oli']	['ex', 'inh', 'oli']
5813	PSME2	full-splice_match	0.24359	0.0769231	0.0769231	0.025641	0.102564	0.423077	0.0128205	0.0384615	0.113924	0.189873	0.151899	0.139241	0.0632911	0.278481	0	0.0632911	['ast', 'ex', 'inh', 'opc', 'oli']	['ast', 'ex', 'end', 'inh', 'mic', 'opc', 'oli']
5814	PSME2	incomplete-splice_match	0	0.173913	0	0.217391	0.0869565	0.521739	0	0	0.25	0	0.5	0	0.25	0	0	0	['ex', 'mic', 'opc', 'oli']	['ast', 'inh', 'opc']
5815	PSME2	full-splice_match	0.136364	0.5	0.136364	0.0454545	0	0.181818	0	0	0	0.533333	0.266667	0	0.0666667	0.133333	0	0	['ast', 'ex', 'inh', 'oli']	['ex', 'inh', 'opc', 'oli']
5816	PSME2	full-splice_match	0.666667	0	0	0.333333	0	0	0	0	0.142857	0.571429	0.142857	0.142857	0	0	0	0	['ast', 'mic']	['ast', 'ex', 'inh', 'mic']
5822	IRF9	full-splice_match	0.230769	0.230769	0	0	0.153846	0.384615	0	0	0.1	0.1	0.1	0.2	0.05	0.4	0	0.05	['ast', 'ex', 'opc', 'oli']	['ast', 'ex', 'end', 'inh', 'mic', 'opc', 'oli']
5826	IRF9	full-splice_match	0.555556	0.111111	0	0	0	0.333333	0	0	0.125	0.375	0.125	0	0.125	0.25	0	0	['ast', 'ex', 'oli']	['ast', 'ex', 'inh', 'opc', 'oli']
5827	IRF9	full-splice_match	0.181818	0.0227273	0.0681818	0.0909091	0.25	0.386364	0	0	0.195122	0.121951	0.146341	0.0243902	0.121951	0.390244	0	0	['ast', 'inh', 'mic', 'opc', 'oli']	['ast', 'ex', 'inh', 'opc', 'oli']
5831	REC8	incomplete-splice_match	0	0.111111	0.222222	0	0.111111	0.555556	0	0	0.0294118	0.558824	0.264706	0	0	0.147059	0	0	['ex', 'inh', 'opc', 'oli']	['ex', 'inh', 'oli']
5832	IPO4	incomplete-splice_match	0	0	0	0	0	1	0	0	0	0.125	0	0	0	0.875	0	0	['oli']	['ex', 'oli']
5842	GMPR2	full-splice_match	0.123077	0.384615	0.0769231	0.0461538	0.0307692	0.323077	0	0.0153846	0.0769231	0.0769231	0	0.0769231	0	0.769231	0	0	['ast', 'ex', 'inh', 'oli']	['ast', 'ex', 'mic', 'oli']
5844	ENSG00000287436	full-splice_match	0.102564	0.128205	0.025641	0.025641	0.025641	0.666667	0	0.025641	0.0943396	0.188679	0.0377358	0.0566038	0.0754717	0.54717	0	0	['ast', 'ex', 'oli']	['ast', 'ex', 'mic', 'opc', 'oli']
5848	ENSG00000284802	full-splice_match	0.0588235	0.294118	0.235294	0	0.0588235	0.352941	0	0	0	0.333333	0.25	0	0	0.416667	0	0	['ast', 'ex', 'inh', 'opc', 'oli']	['ex', 'inh', 'oli']
5849	TM9SF1	full-splice_match	0.220588	0	0.0882353	0.0588235	0.102941	0.529412	0	0	0.125	0.0833333	0.208333	0.0833333	0	0.5	0	0	['ast', 'inh', 'mic', 'opc', 'oli']	['ast', 'ex', 'inh', 'mic', 'oli']
5853	TM9SF1	incomplete-splice_match	0	0.5	0	0	0.5	0	0	0	0	0.2	0.3	0	0.1	0.3	0	0.1	['ex', 'opc']	['ex', 'end', 'inh', 'opc', 'oli']
5854	ENSG00000285309	full-splice_match	0.097561	0.390244	0.219512	0.0731707	0.0487805	0.170732	0	0	0.097561	0.390244	0.195122	0.0731707	0	0.243902	0	0	['ast', 'ex', 'inh', 'mic', 'oli']	['ast', 'ex', 'inh', 'mic', 'oli']
5857	CHMP4A	full-splice_match	0.09375	0.114583	0.0520833	0.03125	0.03125	0.65625	0	0.0208333	0.0454545	0.113636	0.0568182	0.0454545	0.0340909	0.681818	0	0.0227273	['ast', 'ex', 'inh', 'oli']	['ex', 'inh', 'oli']
5858	CHMP4A	full-splice_match	0	0	0	0	0.111111	0.888889	0	0	0.157895	0.157895	0	0.0526316	0	0.631579	0	0	['opc', 'oli']	['ast', 'ex', 'mic', 'oli']
5859	CHMP4A	incomplete-splice_match	0	0.125	0.125	0.125	0	0.5	0	0.125	0	0	0.181818	0	0.0909091	0.727273	0	0	['ex', 'end', 'inh', 'mic', 'oli']	['inh', 'opc', 'oli']
5864	MDP1	full-splice_match	0	0.2	0.6	0	0	0.2	0	0	0	0	0.166667	0	0	0.833333	0	0	['ex', 'inh', 'oli']	['inh', 'oli']
5870	MDP1	full-splice_match	0.0526316	0.631579	0.105263	0	0	0.157895	0	0.0526316	0	0.75	0.25	0	0	0	0	0	['ast', 'ex', 'end', 'inh', 'oli']	['ex', 'inh']
5874	MDP1	full-splice_match	0.0285714	0.228571	0	0.0857143	0.0571429	0.6	0	0	0.14	0.14	0.08	0	0.04	0.6	0	0	['ex', 'mic', 'opc', 'oli']	['ast', 'ex', 'inh', 'oli']
5876	NEDD8	full-splice_match	0.0403226	0.400922	0.137097	0.0184332	0.0334101	0.351382	0.00230415	0.016129	0.033264	0.35447	0.185031	0.018711	0.029106	0.372141	0.002079	0.00519751	['ex', 'inh', 'oli']	['ex', 'inh', 'oli']
5877	NEDD8	novel_in_catalog	0	0	0	0	0	1	0	0	0	0	0	0	0	1	0	0	['oli']	['oli']
5880	NEDD8	full-splice_match	0.111111	0.222222	0.222222	0	0	0.333333	0	0.111111	0.04	0.32	0.12	0.04	0	0.48	0	0	['ast', 'ex', 'end', 'inh', 'oli']	['ex', 'inh', 'oli']
5887	MDP1	novel_in_catalog	0	0	0	0	0	1	0	0	0	0.222222	0.333333	0	0	0.444444	0	0	['oli']	['ex', 'inh', 'oli']
5890	NEDD8	full-splice_match	0.105263	0.157895	0.105263	0	0.0526316	0.578947	0	0	0	0.24	0.2	0.08	0.04	0.44	0	0	['ast', 'ex', 'inh', 'opc', 'oli']	['ex', 'inh', 'mic', 'oli']
5895	ENSG00000285296	incomplete-splice_match	0.0909091	0	0.0909091	0	0	0.727273	0	0.0909091	0.142857	0.428571	0	0	0	0.428571	0	0	['ast', 'end', 'inh', 'oli']	['ast', 'ex', 'oli']
5910	DHRS1	full-splice_match	0.0776699	0.427184	0.174757	0.0485437	0.0194175	0.252427	0	0	0.0847458	0.305085	0.322034	0	0.0338983	0.254237	0	0	['ast', 'ex', 'inh', 'oli']	['ast', 'ex', 'inh', 'oli']
5911	DHRS1	full-splice_match	0	0	0	0	0	1	0	0	0.0454545	0.295455	0.227273	0.0227273	0.0227273	0.363636	0.0227273	0	['oli']	['ex', 'inh', 'oli']
5914	LTB4R2	full-splice_match	0	0.214286	0.0952381	0.047619	0	0.642857	0	0	0.0810811	0.594595	0.0540541	0	0	0.27027	0	0	['ex', 'inh', 'oli']	['ast', 'ex', 'inh', 'oli']
5920	EEFSEC	incomplete-splice_match	0.125	0.5	0.125	0.125	0	0.125	0	0	0.04	0.12	0.24	0.04	0.04	0.52	0	0	['ast', 'ex', 'inh', 'mic', 'oli']	['ex', 'inh', 'oli']
5922	EEFSEC	incomplete-splice_match	0	0	0.571429	0	0.142857	0.285714	0	0	0	0.352941	0	0.0588235	0.117647	0.470588	0	0	['inh', 'opc', 'oli']	['ex', 'mic', 'opc', 'oli']
5925	GRM5P1	incomplete-splice_match	0	0.769231	0.230769	0	0	0	0	0	0	0.862069	0.137931	0	0	0	0	0	['ex', 'inh']	['ex', 'inh']
5938	C1QTNF4	full-splice_match	0.0239234	0.559809	0.244019	0.00956938	0.0191388	0.138756	0	0.00478469	0.0481928	0.518072	0.325301	0	0.0160643	0.0923695	0	0	['ex', 'inh', 'oli']	['ex', 'inh', 'oli']
5941	MTCH2	incomplete-splice_match	0	0.333333	0	0.333333	0	0.166667	0.166667	0	0.1	0.1	0.1	0.2	0	0.4	0	0.1	['ex', 'mic', 'oli', 'per']	['ast', 'ex', 'end', 'inh', 'mic', 'oli']
5944	FNBP4	incomplete-splice_match	0.06	0	0.04	0.04	0.02	0.84	0	0	0.0952381	0.0952381	0.190476	0.047619	0.142857	0.428571	0	0	['ast', 'oli']	['ast', 'ex', 'inh', 'opc', 'oli']
5954	FNBP4	incomplete-splice_match	0	0	0	0	0	1	0	0	0.0666667	0.333333	0.0666667	0.0666667	0.0666667	0.4	0	0	['oli']	['ast', 'ex', 'inh', 'mic', 'opc', 'oli']
5958	MTCH2	full-splice_match	0.0909091	0.363636	0.121212	0.0454545	0.0454545	0.333333	0	0	0	0.0222222	0.133333	0.0222222	0.0666667	0.733333	0	0.0222222	['ast', 'ex', 'inh', 'oli']	['inh', 'opc', 'oli']
5969	MTCH2	incomplete-splice_match	0.2	0.6	0	0	0	0.2	0	0	0.0714286	0.5	0	0	0	0.428571	0	0	['ast', 'ex', 'oli']	['ast', 'ex', 'oli']
5974	NAALAD2	incomplete-splice_match	0	0.466667	0.266667	0	0.0666667	0.2	0	0	0	0.4375	0.3125	0	0.125	0.125	0	0	['ex', 'inh', 'opc', 'oli']	['ex', 'inh', 'opc', 'oli']
5975	NAALAD2	incomplete-splice_match	0	0.333333	0.166667	0	0.166667	0.333333	0	0	0	0.416667	0.5	0	0	0.0833333	0	0	['ex', 'inh', 'opc', 'oli']	['ex', 'inh', 'oli']
5981	NAALAD2	incomplete-splice_match	0	0.4	0.4	0	0	0.2	0	0	0	0.192308	0.192308	0	0.0384615	0.576923	0	0	['ex', 'inh', 'oli']	['ex', 'inh', 'oli']
5984	ENSG00000285305	full-splice_match	0.111111	0.444444	0.333333	0	0	0.111111	0	0	0	0.461538	0.384615	0	0.0769231	0.0769231	0	0	['ast', 'ex', 'inh', 'oli']	['ex', 'inh', 'opc', 'oli']
5987	ENSG00000285065	full-splice_match	0.0769231	0.461538	0.153846	0.025641	0.025641	0.25641	0	0	0.121951	0.317073	0.170732	0.0243902	0	0.365854	0	0	['ast', 'ex', 'inh', 'oli']	['ast', 'ex', 'inh', 'oli']
5989	CHORDC1	full-splice_match	0.0737705	0.213115	0.0655738	0	0	0.639344	0	0.00819672	0.0606061	0.409091	0.181818	0	0.0151515	0.318182	0.0151515	0	['ast', 'ex', 'inh', 'oli']	['ast', 'ex', 'inh', 'oli']
5990	CHORDC1	incomplete-splice_match	0	0.25	0.125	0	0	0.625	0	0	0	0.3	0	0	0.1	0.6	0	0	['ex', 'inh', 'oli']	['ex', 'opc', 'oli']
5992	CHORDC1	incomplete-splice_match	0.08	0.32	0.12	0	0.04	0.44	0	0	0.1	0.3	0.2	0	0	0.4	0	0	['ast', 'ex', 'inh', 'oli']	['ast', 'ex', 'inh', 'oli']
5995	CHORDC1	incomplete-splice_match	0.04	0.56	0.12	0	0.02	0.26	0	0	0	0.318182	0.181818	0.0454545	0	0.454545	0	0	['ex', 'inh', 'oli']	['ex', 'inh', 'oli']
5998	CHORDC1	incomplete-splice_match	0.0961538	0.269231	0.0576923	0.0384615	0.0192308	0.519231	0	0	0.0789474	0.368421	0.0526316	0.0789474	0.0263158	0.394737	0	0	['ast', 'ex', 'inh', 'oli']	['ast', 'ex', 'inh', 'mic', 'oli']
5999	CHORDC1	incomplete-splice_match	0.25	0	0.375	0	0	0.375	0	0	0	0.333333	0	0	0.111111	0.555556	0	0	['ast', 'inh', 'oli']	['ex', 'opc', 'oli']
6000	CHORDC1	full-splice_match	0.05	0.45	0.15	0.05	0	0.3	0	0	0.047619	0.333333	0.142857	0.047619	0	0.428571	0	0	['ast', 'ex', 'inh', 'mic', 'oli']	['ex', 'inh', 'oli']
6005	ENSG00000285009	full-splice_match	0	0.666667	0	0.166667	0	0.166667	0	0	0	0.25	0.125	0.125	0.5	0	0	0	['ex', 'mic', 'oli']	['ex', 'inh', 'mic', 'opc']
6006	XYLT1	incomplete-splice_match	0	0.5	0	0	0.5	0	0	0	0	1	0	0	0	0	0	0	['ex', 'opc']	['ex']
6017	FAM86DP	full-splice_match	0	0.5	0	0.5	0	0	0	0	0	0.25	0.125	0	0.25	0.375	0	0	['ex', 'mic']	['ex', 'inh', 'opc', 'oli']
6047	MRPL23	full-splice_match	0.0392157	0.24183	0.0718954	0.0196078	0.0196078	0.601307	0.00653595	0	0.0350877	0.333333	0.0964912	0.00877193	0.0526316	0.473684	0	0	['ex', 'inh', 'oli']	['ex', 'inh', 'opc', 'oli']
6053	PPFIA1	incomplete-splice_match	0.4	0.2	0	0	0	0.4	0	0	0.1	0.3	0.2	0	0	0.4	0	0	['ast', 'ex', 'oli']	['ast', 'ex', 'inh', 'oli']
6054	PPFIA1	incomplete-splice_match	0.428571	0	0	0	0.142857	0.285714	0	0.142857	0.125	0.375	0.25	0	0	0.25	0	0	['ast', 'end', 'opc', 'oli']	['ast', 'ex', 'inh', 'oli']
6065	CTTN	incomplete-splice_match	0.156863	0.254902	0.0784314	0	0.0392157	0.45098	0	0.0196078	0.0483871	0.33871	0.0483871	0	0.0322581	0.532258	0	0	['ast', 'ex', 'inh', 'oli']	['ex', 'oli']
6066	CTTN	full-splice_match	0.0666667	0.177778	0.0666667	0	0.0222222	0.666667	0	0	0.0350877	0.192982	0.157895	0	0.0175439	0.596491	0	0	['ast', 'ex', 'inh', 'oli']	['ex', 'inh', 'oli']
6077	HPS5	incomplete-splice_match	0	0.5	0	0	0	0.5	0	0	0	0	0.5	0.25	0	0.25	0	0	['ex', 'oli']	['inh', 'mic', 'oli']
6084	GTF2H1	incomplete-splice_match	0	0	0	0	0	1	0	0	0	0.111111	0.111111	0	0.111111	0.666667	0	0	['oli']	['ex', 'inh', 'opc', 'oli']
6093	GTF2H1	full-splice_match	0	0.166667	0.166667	0	0.166667	0.5	0	0	0	0.4	0.2	0	0	0.4	0	0	['ex', 'inh', 'opc', 'oli']	['ex', 'inh', 'oli']
6095	LDHA	incomplete-splice_match	0.2	0	0	0.2	0	0.6	0	0	0	0.333333	0.666667	0	0	0	0	0	['ast', 'mic', 'oli']	['ex', 'inh']
6097	LDHA	full-splice_match	0.3	0.25	0.05	0.05	0.05	0.2	0.05	0.05	0	0.454545	0.272727	0	0	0.272727	0	0	['ast', 'ex', 'end', 'inh', 'mic', 'opc', 'oli', 'per']	['ex', 'inh', 'oli']
6098	LDHA	full-splice_match	0.35	0.05	0.1	0.2	0	0.15	0	0.15	0.0769231	0.153846	0.153846	0.461538	0	0.153846	0	0	['ast', 'ex', 'end', 'inh', 'mic', 'oli']	['ast', 'ex', 'inh', 'mic', 'oli']
6100	LDHA	incomplete-splice_match	0	0.5	0	0	0	0.5	0	0	0.2	0	0.4	0	0	0.4	0	0	['ex', 'oli']	['ast', 'inh', 'oli']
6101	LDHA	incomplete-splice_match	0	0.5	0.125	0	0	0.375	0	0	0	0	0.333333	0	0.166667	0.5	0	0	['ex', 'inh', 'oli']	['inh', 'opc', 'oli']
6103	LDHA	full-splice_match	0.0935065	0.488312	0.116883	0.0337662	0.0155844	0.236364	0.0025974	0.012987	0.0436364	0.418182	0.221818	0.0763636	0.0436364	0.196364	0	0	['ast', 'ex', 'inh', 'oli']	['ex', 'inh', 'mic', 'oli']
6105	NOC4L	full-splice_match	0	0.2	0	0	0.1	0.7	0	0	0.03125	0.3125	0.15625	0.03125	0.03125	0.4375	0	0	['ex', 'opc', 'oli']	['ex', 'inh', 'oli']
6111	GALNT9	incomplete-splice_match	0.005	0.895	0.09	0	0	0.01	0	0	0.0217391	0.73913	0.206522	0	0	0.0326087	0	0	['ex', 'inh']	['ex', 'inh']
6113	GALNT9	incomplete-splice_match	0.0465116	0.651163	0.232558	0	0	0.0697674	0	0	0	0.666667	0.333333	0	0	0	0	0	['ex', 'inh', 'oli']	['ex', 'inh']
6114	GALNT9	full-splice_match	0.0222222	0.933333	0.0222222	0	0	0.0222222	0	0	0	0.8125	0.1875	0	0	0	0	0	['ex']	['ex', 'inh']
6115	ENSG00000288376_ENSG00000288458	fusion	0.0175439	0.929825	0.0526316	0	0	0	0	0	0	0.966667	0.0333333	0	0	0	0	0	['ex', 'inh']	['ex']
6117	ENSG00000288376_ENSG00000288458	fusion	0	1	0	0	0	0	0	0	0	1	0	0	0	0	0	0	['ex']	['ex']
6118	ENSG00000288376	full-splice_match	0	1	0	0	0	0	0	0	0	0.882353	0.117647	0	0	0	0	0	['ex']	['ex', 'inh']
6125	CLSTN3	incomplete-splice_match	0.0555556	0.722222	0.166667	0	0.0555556	0	0	0	0	1	0	0	0	0	0	0	['ast', 'ex', 'inh', 'opc']	['ex']
6131	ENSG00000288147	novel_not_in_catalog	0.285714	0	0.047619	0	0.285714	0.380952	0	0	0.444444	0	0.0555556	0	0.333333	0.166667	0	0	['ast', 'opc', 'oli']	['ast', 'inh', 'opc', 'oli']
6145	ENSG00000290631	incomplete-splice_match	0.0486726	0.495575	0.20354	0.0176991	0.00884956	0.225664	0	0	0.0140845	0.43662	0.323944	0.0352113	0.0140845	0.161972	0	0.0140845	['ex', 'inh', 'oli']	['ex', 'inh', 'oli']
6146	ENSG00000290631	incomplete-splice_match	0	0.4	0.2	0	0	0.4	0	0	0	0.4	0.4	0	0	0.2	0	0	['ex', 'inh', 'oli']	['ex', 'inh', 'oli']
6147	ENSG00000290631	incomplete-splice_match	0.166667	0.166667	0	0	0	0.666667	0	0	0.0666667	0.4	0.0666667	0.1	0.1	0.266667	0	0	['ast', 'ex', 'oli']	['ast', 'ex', 'inh', 'mic', 'opc', 'oli']
6192	NIPA1	full-splice_match	0	0	0.0526316	0	0	0.947368	0	0	0	0.111111	0.0833333	0	0.0277778	0.777778	0	0	['inh', 'oli']	['ex', 'inh', 'oli']
6193	NIPA1	incomplete-splice_match	0.176471	0.176471	0.0588235	0	0.0588235	0.529412	0	0	0	0.0909091	0.181818	0	0.181818	0.545455	0	0	['ast', 'ex', 'inh', 'opc', 'oli']	['ex', 'inh', 'opc', 'oli']
6202	ENSG00000288405	novel_not_in_catalog	0	0	0	0	0	1	0	0	0	0	0	0	0.2	0.8	0	0	['oli']	['opc', 'oli']
6222	CYFIP1	incomplete-splice_match	0.219512	0.0487805	0.121951	0.365854	0.097561	0.121951	0	0.0243902	0.0555556	0.277778	0.180556	0.277778	0.0833333	0.125	0	0	['ast', 'inh', 'mic', 'opc', 'oli']	['ast', 'ex', 'inh', 'mic', 'opc', 'oli']
6230	CYFIP1	novel_not_in_catalog	0	0.285714	0.142857	0.571429	0	0	0	0	0.111111	0.111111	0.111111	0.666667	0	0	0	0	['ex', 'inh', 'mic']	['ast', 'ex', 'inh', 'mic']
6250	MAGEL2	full-splice_match	0.0263158	0.473684	0.394737	0	0.0526316	0.0526316	0	0	0	0.46875	0.46875	0	0.0625	0	0	0	['ex', 'inh', 'opc', 'oli']	['ex', 'inh', 'opc']
6265	SLC5A11	incomplete-splice_match	0	0	0	0	0	1	0	0	0	0	0	0	0	1	0	0	['oli']	['oli']
6271	SLC5A11	incomplete-splice_match	0	0	0	0.142857	0	0.857143	0	0	0	0	0	0	0	1	0	0	['mic', 'oli']	['oli']
6279	ARHGAP17	full-splice_match	0.119718	0.176056	0.0704225	0.0352113	0.028169	0.570423	0	0	0.19403	0.149254	0.164179	0.0746269	0.0746269	0.343284	0	0	['ast', 'ex', 'inh', 'oli']	['ast', 'ex', 'inh', 'mic', 'opc', 'oli']
6297	ELP5	full-splice_match	0.166667	0.0277778	0.0555556	0	0.0833333	0.666667	0	0	0.0294118	0.441176	0.294118	0	0.0588235	0.176471	0	0	['ast', 'inh', 'opc', 'oli']	['ex', 'inh', 'opc', 'oli']
6299	EIF5A	incomplete-splice_match	0	0.25	0.125	0	0	0.5	0	0.125	0.0588235	0.411765	0.117647	0.0588235	0.0588235	0.294118	0	0	['ex', 'end', 'inh', 'oli']	['ast', 'ex', 'inh', 'mic', 'opc', 'oli']
6300	EIF5A	full-splice_match	0.0237154	0.166008	0.0909091	0.0237154	0.0474308	0.644269	0.00395257	0	0.0229885	0.448276	0.198276	0.0172414	0.0258621	0.284483	0.00287356	0	['ex', 'inh', 'oli']	['ex', 'inh', 'oli']
6306	GPS2	novel_in_catalog	0.326087	0.173913	0.108696	0	0.0652174	0.304348	0	0.0217391	0	0.62069	0.206897	0	0.0689655	0.103448	0	0	['ast', 'ex', 'inh', 'opc', 'oli']	['ex', 'inh', 'opc', 'oli']
6308	GPS2	full-splice_match	0.333333	0.5	0	0	0	0.166667	0	0	0.0555556	0.222222	0	0	0.0555556	0.666667	0	0	['ast', 'ex', 'oli']	['ast', 'ex', 'opc', 'oli']
6309	GPS2	incomplete-splice_match	0.142857	0.571429	0.142857	0	0	0.142857	0	0	0	0.666667	0	0	0	0.333333	0	0	['ast', 'ex', 'inh', 'oli']	['ex', 'oli']
6310	GPS2	incomplete-splice_match	0.114286	0.342857	0.0285714	0.0285714	0.0285714	0.457143	0	0	0.0930233	0.139535	0.116279	0	0.0465116	0.604651	0	0	['ast', 'ex', 'oli']	['ast', 'ex', 'inh', 'oli']
6311	GPS2	incomplete-splice_match	0.176471	0.411765	0.0588235	0	0.0588235	0.294118	0	0	0.136364	0.545455	0.0454545	0	0	0.272727	0	0	['ast', 'ex', 'inh', 'opc', 'oli']	['ast', 'ex', 'oli']
6316	GPS2	full-splice_match	0	0.666667	0.333333	0	0	0	0	0	0.0714286	0.357143	0.214286	0.0714286	0	0.285714	0	0	['ex', 'inh']	['ast', 'ex', 'inh', 'mic', 'oli']
6322	ACAP1	incomplete-splice_match	0.166667	0.333333	0.5	0	0	0	0	0									['ast', 'ex', 'inh']	[]
6327	KCTD11	full-splice_match	0.131579	0	0.131579	0.0789474	0	0.657895	0	0	0.2	0.08	0.12	0.08	0.08	0.44	0	0	['ast', 'inh', 'mic', 'oli']	['ast', 'ex', 'inh', 'mic', 'opc', 'oli']
6328	MCRIP1	full-splice_match	0.0833333	0.25	0	0	0	0.666667	0	0	0.092437	0.0756303	0.0672269	0.0336134	0.0420168	0.689076	0	0	['ast', 'ex', 'oli']	['ast', 'ex', 'inh', 'oli']
6334	MCRIP1	full-splice_match	0.0628571	0.380952	0.114286	0.0228571	0.0361905	0.380952	0.00190476	0	0.0292398	0.327485	0.157895	0.00584795	0.0526316	0.426901	0	0	['ast', 'ex', 'inh', 'oli']	['ex', 'inh', 'opc', 'oli']
6340	MIR23AHG	full-splice_match	0.395833	0.104167	0.0208333	0.3125	0	0.145833	0	0.0208333	0.32	0.16	0.04	0.36	0	0.12	0	0	['ast', 'ex', 'mic', 'oli']	['ast', 'ex', 'mic', 'oli']
6341	NANOS3	novel_in_catalog	0	0.690909	0.272727	0	0	0.0363636	0	0	0.0327869	0.639344	0.213115	0.0163934	0.0163934	0.0819672	0	0	['ex', 'inh']	['ex', 'inh', 'oli']
6342	NANOS3	full-splice_match	0	1	0	0	0	0	0	0	0	0.75	0.125	0	0	0.125	0	0	['ex']	['ex', 'inh', 'oli']
6349	RFX1	novel_not_in_catalog	0	0.333333	0.333333	0	0	0.333333	0	0	0	0.6	0	0	0	0.4	0	0	['ex', 'inh', 'oli']	['ex', 'oli']
6351	MISP3	full-splice_match	0.0963855	0.325301	0.0963855	0	0.0361446	0.445783	0	0	0.0166667	0.291667	0.225	0	0.025	0.441667	0	0	['ast', 'ex', 'inh', 'oli']	['ex', 'inh', 'oli']
6353	MISP3	incomplete-splice_match	0	1	0	0	0	0	0	0	0	0.5	0.25	0	0.25	0	0	0	['ex']	['ex', 'inh', 'opc']
6354	MISP3	full-splice_match	0.0952381	0.190476	0.238095	0	0.047619	0.428571	0	0	0	0.545455	0.0909091	0	0	0.363636	0	0	['ast', 'ex', 'inh', 'oli']	['ex', 'inh', 'oli']
6355	MISP3	full-splice_match	0	0.25	0.125	0	0.0625	0.5625	0	0	0	0.333333	0.0833333	0	0.0833333	0.5	0	0	['ex', 'inh', 'opc', 'oli']	['ex', 'inh', 'opc', 'oli']
6356	MISP3	incomplete-splice_match	0.0555556	0.537037	0.185185	0	0.0185185	0.203704	0	0	0.02	0.58	0.26	0	0.04	0.1	0	0	['ast', 'ex', 'inh', 'oli']	['ex', 'inh', 'oli']
6363	PRKACA	full-splice_match	0.125	0.375	0.125	0.25	0	0.125	0	0	0.111111	0.222222	0.555556	0.111111	0	0	0	0	['ast', 'ex', 'inh', 'mic', 'oli']	['ast', 'ex', 'inh', 'mic']
6367	SAMD1	incomplete-splice_match	0	0.5	0	0	0.125	0.375	0	0	0	0.25	0.25	0	0	0.5	0	0	['ex', 'opc', 'oli']	['ex', 'inh', 'oli']
6392	novelGene_ENSG00000288254_AS	antisense	0.125	0	0	0	0.125	0.75	0	0	0	0	0	0.111111	0.111111	0.777778	0	0	['ast', 'opc', 'oli']	['mic', 'opc', 'oli']
6404	novelGene_ENSG00000288444_AS	antisense	0	0.125	0	0.125	0.125	0.625	0	0	0	0	0	0.111111	0.111111	0.777778	0	0	['ex', 'mic', 'opc', 'oli']	['mic', 'opc', 'oli']
6407	ENSG00000288444	full-splice_match	0.0730111	0.0433031	0.0594159	0.0362538	0.0347432	0.747734	0.00151057	0.0040282	0.0431818	0.0772727	0.0965909	0.0363636	0.0454545	0.692045	0.00454545	0.00454545	['ast', 'inh', 'oli']	['ex', 'inh', 'oli']
6409	ENSG00000288254	full-splice_match	0.0527638	0.080402	0.0452261	0.0351759	0.0251256	0.756281	0.00125628	0.00376884	0.0528053	0.186469	0.153465	0.0330033	0.049505	0.519802	0.00330033	0.00165017	['ast', 'ex', 'oli']	['ast', 'ex', 'inh', 'oli']
6448	C1GALT1C1	full-splice_match	0.0289855	0.101449	0.057971	0	0.0869565	0.724638	0	0	0.101266	0.101266	0.0886076	0.0253165	0.0759494	0.594937	0.0126582	0	['ex', 'inh', 'opc', 'oli']	['ast', 'ex', 'inh', 'opc', 'oli']
6450	GLUD2	full-splice_match	0.0666667	0.533333	0	0.0666667	0.0666667	0.266667	0	0	0	0.833333	0.0833333	0	0	0.0833333	0	0	['ast', 'ex', 'mic', 'opc', 'oli']	['ex', 'inh', 'oli']
6477	KCNT2	incomplete-splice_match	0	1	0	0	0	0	0	0	0	0.6	0	0	0.4	0	0	0	['ex']	['ex', 'opc']
6480	KCNT2	incomplete-splice_match	0.0555556	0.666667	0.222222	0	0	0	0	0.0555556	0	0.641026	0.307692	0	0.0512821	0	0	0	['ast', 'ex', 'end', 'inh']	['ex', 'inh', 'opc']
6485	ENSG00000291376	full-splice_match	0.222222	0	0.444444	0	0	0.333333	0	0	0.3	0.3	0.2	0.1	0.1	0	0	0	['ast', 'inh', 'oli']	['ast', 'ex', 'inh', 'mic', 'opc']
6486	NECAP2	full-splice_match	0.0714286	0.357143	0.0357143	0.0357143	0	0.5	0	0	0	0.166667	0.333333	0	0	0.5	0	0	['ast', 'ex', 'oli']	['ex', 'inh', 'oli']
6489	NECAP2	full-splice_match	0.111111	0.185185	0.222222	0	0.037037	0.444444	0	0	0.0434783	0.434783	0.217391	0.0434783	0	0.26087	0	0	['ast', 'ex', 'inh', 'oli']	['ex', 'inh', 'oli']
6491	ENSG00000291386	full-splice_match	0.117647	0.352941	0.176471	0	0	0.352941	0	0	0	0.428571	0.142857	0.142857	0	0.285714	0	0	['ast', 'ex', 'inh', 'oli']	['ex', 'inh', 'mic', 'oli']
6492	ENSG00000291408	full-splice_match	0.0588235	0.470588	0.294118	0.0588235	0.0588235	0.0588235	0	0	0.0810811	0.297297	0	0.27027	0.0540541	0.297297	0	0	['ast', 'ex', 'inh', 'mic', 'opc', 'oli']	['ast', 'ex', 'mic', 'opc', 'oli']
6493	ENSG00000291408	full-splice_match	0.142857	0.285714	0.142857	0.285714	0.0714286	0.0714286	0	0	0.142857	0.571429	0	0.0714286	0.0714286	0.142857	0	0	['ast', 'ex', 'inh', 'mic', 'opc', 'oli']	['ast', 'ex', 'mic', 'opc', 'oli']
6494	ENSG00000291408	full-splice_match	0.121212	0.393939	0.272727	0.0606061	0.0909091	0.0606061	0	0	0.0740741	0.333333	0.111111	0	0.148148	0.296296	0.037037	0	['ast', 'ex', 'inh', 'mic', 'opc', 'oli']	['ast', 'ex', 'inh', 'opc', 'oli']
6496	ENSG00000292236	full-splice_match	0.0113636	0.238636	0.0795455	0.0340909	0.0454545	0.590909	0	0	0.0588235	0.235294	0.161765	0.0147059	0.0294118	0.5	0	0	['ex', 'inh', 'oli']	['ast', 'ex', 'inh', 'oli']
6500	EIF1AXP1	full-splice_match	0.1	0.133333	0.1	0.0333333	0.0333333	0.6	0	0	0	0.305556	0.166667	0	0.0555556	0.472222	0	0	['ast', 'ex', 'inh', 'oli']	['ex', 'inh', 'opc', 'oli']
6501	ENSG00000292228	novel_not_in_catalog	0	0.333333	0	0	0.333333	0.333333	0	0	0.230769	0.230769	0.0769231	0.0769231	0.0769231	0.307692	0	0	['ex', 'opc', 'oli']	['ast', 'ex', 'inh', 'mic', 'opc', 'oli']
6502	ENSG00000292228	incomplete-splice_match	0.222222	0	0.222222	0	0.222222	0.333333	0	0	0	0.142857	0	0.142857	0	0.714286	0	0	['ast', 'inh', 'opc', 'oli']	['ex', 'mic', 'oli']
6508	NBPF1	incomplete-splice_match	0.363636	0.0909091	0	0	0.0909091	0.454545	0	0	0	0.333333	0	0	0.0666667	0.6	0	0	['ast', 'ex', 'opc', 'oli']	['ex', 'opc', 'oli']
6514	SZRD1	full-splice_match	0.125	0.125	0	0.125	0	0.625	0	0	0.133333	0.133333	0	0.133333	0.133333	0.466667	0	0	['ast', 'ex', 'mic', 'oli']	['ast', 'ex', 'mic', 'opc', 'oli']
6525	ENSG00000292226	incomplete-splice_match	0.111111	0	0.333333	0.111111	0.222222	0.222222	0	0	0.2	0	0	0	0	0.8	0	0	['ast', 'inh', 'mic', 'opc', 'oli']	['ast', 'oli']
6535	ENSG00000292227	novel_not_in_catalog	0.0909091	0.181818	0.181818	0	0.0909091	0.454545	0	0	0.153846	0.0769231	0.0769231	0	0.0769231	0.615385	0	0	['ast', 'ex', 'inh', 'opc', 'oli']	['ast', 'ex', 'inh', 'opc', 'oli']
6580	ENSG00000291889	full-splice_match	0.5	0	0	0	0	0.5	0	0	0.8	0	0.2	0	0	0	0	0	['ast', 'oli']	['ast', 'inh']
6581	ZNF496-DT	full-splice_match	0.107143	0.321429	0.142857	0	0.0714286	0.357143	0	0	0.128205	0.384615	0.25641	0	0.025641	0.205128	0	0	['ast', 'ex', 'inh', 'opc', 'oli']	['ast', 'ex', 'inh', 'oli']
6590	MEF2D	incomplete-splice_match	0	0.666667	0	0	0	0.333333	0	0	0.25	0	0	0	0	0.75	0	0	['ex', 'oli']	['ast', 'oli']
6599	HAPLN2	incomplete-splice_match	0	0.01	0.02	0.01	0	0.96	0	0	0	0.0105263	0	0.0105263	0.0105263	0.968421	0	0	['oli']	['oli']
6618	HAPLN2	full-splice_match	0.00395257	0.0237154	0.00395257	0.00395257	0.00395257	0.960474	0	0	0.0105485	0.0907173	0.0421941	0.00421941	0.0147679	0.837553	0	0	['oli']	['ex', 'oli']
6621	HAPLN2	novel_in_catalog	0	0	0	0	0	1	0	0	0	0	0	0	0	1	0	0	['oli']	['oli']
6624	HAPLN2	novel_not_in_catalog	0.0097561	0	0.00487805	0	0.0195122	0.965854	0	0	0.0921053	0.328947	0.144737	0.0131579	0.0131579	0.407895	0	0	['oli']	['ast', 'ex', 'inh', 'oli']
6627	HAPLN2	incomplete-splice_match	0	0.0344828	0	0	0.0172414	0.948276	0	0	0	0	0.0178571	0.0178571	0	0.964286	0	0	['oli']	['oli']
6629	HAPLN2	novel_in_catalog	0	0	0	0	0	1	0	0	0	0.00729927	0.0510949	0	0.00729927	0.934307	0	0	['oli']	['inh', 'oli']
6639	HAPLN2	novel_in_catalog	0	0	0	0	0	1	0	0	0	0.592593	0.185185	0	0	0.222222	0	0	['oli']	['ex', 'inh', 'oli']
6645	GPATCH4	full-splice_match	0.0540541	0.540541	0.189189	0.0540541	0	0.162162	0	0	0	0.444444	0.222222	0	0	0.222222	0	0.111111	['ast', 'ex', 'inh', 'mic', 'oli']	['ex', 'end', 'inh', 'oli']
6646	GPATCH4	full-splice_match	0	0	1	0	0	0	0	0	0	0.5	0.25	0.0625	0.0625	0.0625	0	0.0625	['inh']	['ex', 'end', 'inh', 'mic', 'opc', 'oli']
6653	ENSG00000291755	novel_not_in_catalog	0	1	0	0	0	0	0	0	0	1	0	0	0	0	0	0	['ex']	['ex']
6656	ENSG00000291758	full-splice_match	0.652174	0.217391	0	0	0.0869565	0.0434783	0	0	0.697368	0.0921053	0.0657895	0.0131579	0.0526316	0.0789474	0	0	['ast', 'ex', 'opc']	['ast', 'ex', 'inh', 'opc', 'oli']
6660	novelGene_FABP7P2_AS	antisense	0	0	0	0	0.4	0.6	0	0	0	0.625	0	0.125	0.125	0.125	0	0	['opc', 'oli']	['ex', 'mic', 'opc', 'oli']
6680	FAHD2A	full-splice_match	0.025641	0.384615	0.0897436	0	0.025641	0.448718	0	0.025641	0	0	0	0	0	1	0	0	['ex', 'inh', 'oli']	['oli']
6682	LINC03052	full-splice_match	0	0.1875	0.125	0.0625	0.125	0.5	0	0	0.142857	0.142857	0.0714286	0	0	0.642857	0	0	['ex', 'inh', 'mic', 'opc', 'oli']	['ast', 'ex', 'inh', 'oli']
6687	DYNC1I2	incomplete-splice_match	0	0	0	0	0.125	0.875	0	0	0	0	0	0	0	1	0	0	['opc', 'oli']	['oli']
6688	DYNC1I2	incomplete-splice_match	0.5	0	0	0	0	0.5	0	0	0	0	0	0	0	1	0	0	['ast', 'oli']	['oli']
6692	DYNC1I2	incomplete-splice_match	0.0106383	0.574468	0.138298	0.0106383	0.0106383	0.255319	0	0	0.0114943	0.356322	0.16092	0	0.0229885	0.448276	0	0	['ex', 'inh', 'oli']	['ex', 'inh', 'oli']
6699	DYNC1I2	full-splice_match	0.0181818	0.218182	0.109091	0	0	0.654545	0	0	0.0238095	0.202381	0.178571	0.0238095	0.0119048	0.559524	0	0	['ex', 'inh', 'oli']	['ex', 'inh', 'oli']
6701	DYNC1I2	incomplete-splice_match	0.0465116	0	0	0	0	0.953488	0	0	0.0361446	0	0	0	0.0240964	0.939759	0	0	['oli']	['oli']
6702	DYNC1I2	incomplete-splice_match	0	0	0	0	0	1	0	0	0	0	0	0.166667	0	0.833333	0	0	['oli']	['mic', 'oli']
6704	DYNC1I2	incomplete-splice_match	0	0	0	0.142857	0	0.857143	0	0	0.0769231	0	0	0.0769231	0	0.846154	0	0	['mic', 'oli']	['ast', 'mic', 'oli']
6705	DYNC1I2	full-splice_match	0	0	0	0	0	1	0	0	0	0.0588235	0	0	0	0.941176	0	0	['oli']	['ex', 'oli']
6708	DYNC1I2	incomplete-splice_match	0.0246914	0.0864198	0.0246914	0	0.0123457	0.851852	0	0	0.0357143	0.535714	0.178571	0.0357143	0	0.214286	0	0	['ex', 'oli']	['ex', 'inh', 'oli']
6710	DYNC1I2	incomplete-splice_match	0	0	0	0	0.111111	0.888889	0	0	0	0	0	0	0	1	0	0	['opc', 'oli']	['oli']
6714	DYNC1I2	incomplete-splice_match	0.0357143	0.0357143	0	0	0	0.928571	0	0	0	0	0.0666667	0	0	0.933333	0	0	['oli']	['inh', 'oli']
6716	DYNC1I2	incomplete-splice_match	0	0	0	0	0	1	0	0	0	0.6	0.2	0	0	0.2	0	0	['oli']	['ex', 'inh', 'oli']
6718	DYNC1I2	incomplete-splice_match	0	0	0	0	0.0333333	0.933333	0	0.0333333	0.047619	0.0238095	0	0	0.0238095	0.904762	0	0	['oli']	['oli']
6720	HAT1	full-splice_match	0.016129	0	0	0.016129	0.0322581	0.935484	0	0	0.0555556	0.0416667	0.0972222	0.0555556	0.0277778	0.694444	0	0.0277778	['oli']	['ast', 'inh', 'mic', 'oli']
6723	HAT1	full-splice_match	0.181818	0.181818	0	0	0.0909091	0.545455	0	0	0	0.2	0.2	0	0	0.6	0	0	['ast', 'ex', 'opc', 'oli']	['ex', 'inh', 'oli']
6724	HAT1	incomplete-splice_match	0.0588235	0.352941	0.235294	0	0.0588235	0.294118	0	0	0.0555556	0.111111	0.0555556	0.111111	0.166667	0.5	0	0	['ast', 'ex', 'inh', 'opc', 'oli']	['ast', 'ex', 'inh', 'mic', 'opc', 'oli']
6733	METAP1D	full-splice_match	0	0	0.153846	0.230769	0.0769231	0.538462	0	0	0.136364	0.0454545	0.0454545	0.0909091	0.0909091	0.590909	0	0	['inh', 'mic', 'opc', 'oli']	['ast', 'mic', 'opc', 'oli']
6734	METAP1D	full-splice_match	0.16	0.12	0.04	0.04	0.04	0.6	0	0	0.0555556	0.25	0.0833333	0.0833333	0.138889	0.388889	0	0	['ast', 'ex', 'oli']	['ast', 'ex', 'inh', 'mic', 'opc', 'oli']
6741	SLC25A12	novel_not_in_catalog	0	0.75	0.25	0	0	0	0	0	0	0	0	0	0	1	0	0	['ex', 'inh']	['oli']
6744	SLC25A12	incomplete-splice_match	0.113636	0.409091	0.136364	0.0227273	0.102273	0.204545	0	0.0113636	0.0890411	0.431507	0.246575	0.0136986	0.0547945	0.164384	0	0	['ast', 'ex', 'inh', 'opc', 'oli']	['ast', 'ex', 'inh', 'opc', 'oli']
6745	SLC25A12	incomplete-splice_match	0	1	0	0	0	0	0	0	0	0.6	0.4	0	0	0	0	0	['ex']	['ex', 'inh']
6746	SLC25A12	full-splice_match	0.214286	0	0.142857	0.0714286	0.142857	0.428571	0	0	0.0666667	0.333333	0.333333	0.0666667	0	0.2	0	0	['ast', 'inh', 'mic', 'opc', 'oli']	['ast', 'ex', 'inh', 'mic', 'oli']
6747	SLC25A12	incomplete-splice_match	0.0126582	0.64557	0.177215	0.0126582	0.0253165	0.126582	0	0	0.04	0.52	0.24	0	0.08	0.12	0	0	['ex', 'inh', 'oli']	['ex', 'inh', 'opc', 'oli']
6748	SLC25A12	incomplete-splice_match	0	1	0	0	0	0	0	0	0	1	0	0	0	0	0	0	['ex']	['ex']
6749	SLC25A12	incomplete-splice_match	0.0769231	0.230769	0.230769	0	0.0769231	0.384615	0	0	0	0.384615	0.307692	0	0.153846	0.153846	0	0	['ast', 'ex', 'inh', 'opc', 'oli']	['ex', 'inh', 'opc', 'oli']
6750	SLC25A12	incomplete-splice_match	0.121951	0.317073	0.292683	0	0.0243902	0.243902	0	0	0.03125	0.34375	0.5	0	0	0.125	0	0	['ast', 'ex', 'inh', 'oli']	['ex', 'inh', 'oli']
6751	SLC25A12	incomplete-splice_match	0	0.333333	0	0	0.666667	0	0	0	0.148148	0.407407	0.259259	0	0.111111	0.0740741	0	0	['ex', 'opc']	['ast', 'ex', 'inh', 'opc', 'oli']
6755	ENSG00000292104	full-splice_match	0	0.142857	0.785714	0	0	0.0714286	0	0	0	0	0.916667	0	0	0.0833333	0	0	['ex', 'inh', 'oli']	['inh', 'oli']
6758	SLC25A12	incomplete-splice_match	0	0	0.333333	0	0	0.666667	0	0	0	0.333333	0.333333	0	0	0.333333	0	0	['inh', 'oli']	['ex', 'inh', 'oli']
6764	PLAC9P1	novel_not_in_catalog	0	0	0	0	0	1	0	0	0.0454545	0	0	0	0	0.954545	0	0	['oli']	['oli']
6766	PLAC9P1	full-splice_match	0	0	0	0	0	1	0	0	0.0338983	0	0.0169492	0	0.0169492	0.932203	0	0	['oli']	['oli']
6767	PLAC9P1	full-splice_match	0	0	0	0	0.0153846	0.984615	0	0	0.00649351	0	0.0194805	0.0194805	0	0.954545	0	0	['oli']	['oli']
6772	RAB6C	full-splice_match	0.0243902	0.146341	0.0731707	0	0	0.756098	0	0	0.0357143	0	0.107143	0	0	0.857143	0	0	['ex', 'inh', 'oli']	['inh', 'oli']
6776	RAB6C-AS1	incomplete-splice_match	0	0.0769231	0.0769231	0	0	0.846154	0	0	0	0.136364	0	0	0	0.863636	0	0	['ex', 'inh', 'oli']	['ex', 'oli']
6777	RAB6C-AS1	full-splice_match	0.0555556	0.0555556	0.111111	0	0	0.777778	0	0	0	0.0833333	0.166667	0	0	0.75	0	0	['ast', 'ex', 'inh', 'oli']	['ex', 'inh', 'oli']
6778	CCDC74B	full-splice_match	0	0	0	0	0	1	0	0	0	0.4	0.4	0	0.2	0	0	0	['oli']	['ex', 'inh', 'opc']
6780	MZT2B	full-splice_match	0.0330189	0.424528	0.108491	0.0188679	0.0330189	0.382075	0	0	0.0403226	0.334677	0.120968	0.00403226	0.0322581	0.467742	0	0	['ex', 'inh', 'oli']	['ex', 'inh', 'oli']
6786	MZT2B	full-splice_match	0.133333	0.222222	0.111111	0.0444444	0.0666667	0.4	0	0.0222222	0.0666667	0.216667	0.133333	0.0666667	0.0333333	0.483333	0	0	['ast', 'ex', 'inh', 'opc', 'oli']	['ast', 'ex', 'inh', 'mic', 'oli']
6788	MZT2B	full-splice_match	0	0.258065	0.0645161	0	0.0645161	0.612903	0	0	0.0512821	0.205128	0.153846	0	0.102564	0.487179	0	0	['ex', 'inh', 'opc', 'oli']	['ast', 'ex', 'inh', 'opc', 'oli']
6791	MZT2B	full-splice_match	0.0546875	0.260417	0.0677083	0.0260417	0.0390625	0.544271	0	0.0078125	0.0525292	0.22179	0.122568	0.0311284	0.036965	0.531128	0.00194553	0.00194553	['ast', 'ex', 'inh', 'oli']	['ast', 'ex', 'inh', 'oli']
6797	MZT2B	full-splice_match	0	0.608696	0.0434783	0	0	0.347826	0	0	0	0.384615	0.346154	0.0384615	0.0384615	0.192308	0	0	['ex', 'oli']	['ex', 'inh', 'oli']
6799	MZT2B	full-splice_match	0.0363636	0.0363636	0.0363636	0	0.0545455	0.836364	0	0	0.0638298	0.255319	0.106383	0	0	0.553191	0	0.0212766	['opc', 'oli']	['ast', 'ex', 'inh', 'oli']
6801	MZT2B	novel_in_catalog	0.2	0.12	0.12	0.04	0.04	0.48	0	0	0.111111	0	0	0	0	0.888889	0	0	['ast', 'ex', 'inh', 'oli']	['ast', 'oli']
6802	MZT2B	novel_in_catalog	0	0.1	0	0	0.2	0.7	0	0	0.25	0.25	0	0	0	0.5	0	0	['ex', 'opc', 'oli']	['ast', 'ex', 'oli']
6809	TGOLN2	incomplete-splice_match	0.1	0.1	0.2	0	0	0.6	0	0	0	0.25	0.166667	0	0	0.583333	0	0	['ast', 'ex', 'inh', 'oli']	['ex', 'inh', 'oli']
6810	TGOLN2	full-splice_match	0.153846	0.0769231	0.230769	0	0	0.538462	0	0	0	0	0	0	0	1	0	0	['ast', 'ex', 'inh', 'oli']	['oli']
6811	TGOLN2	incomplete-splice_match	0.0827068	0.240602	0.0676692	0.037594	0.0150376	0.556391	0	0	0.0307692	0.292308	0.146154	0.0461538	0.0384615	0.446154	0	0	['ast', 'ex', 'inh', 'oli']	['ex', 'inh', 'oli']
6825	FAHD2B	full-splice_match	0.172414	0	0	0	0	0.827586	0	0	0.112903	0.145161	0.0645161	0.0322581	0	0.645161	0	0	['ast', 'oli']	['ast', 'ex', 'inh', 'oli']
6826	FAHD2B	full-splice_match	0	0	0	0	0	1	0	0	0	0.371429	0.171429	0	0	0.457143	0	0	['oli']	['ex', 'inh', 'oli']
6843	ANKRD36	full-splice_match	0.0555556	0.222222	0.388889	0.0555556	0.111111	0.166667	0	0	0.0555556	0.722222	0.0555556	0	0	0.166667	0	0	['ast', 'ex', 'inh', 'mic', 'opc', 'oli']	['ast', 'ex', 'inh', 'oli']
6855	ANKRD36	incomplete-splice_match	0	0.304348	0.173913	0	0	0.521739	0	0	0	0.25	0.583333	0	0	0.166667	0	0	['ex', 'inh', 'oli']	['ex', 'inh', 'oli']
6863	ANKRD36	incomplete-splice_match	0.0833333	0.0833333	0	0.0833333	0.25	0.5	0	0	0.0512821	0.512821	0.179487	0	0	0.25641	0	0	['ast', 'ex', 'mic', 'opc', 'oli']	['ast', 'ex', 'inh', 'oli']
6871	ANKRD36B	incomplete-splice_match	0	0.142857	0	0	0	0.857143	0	0	0.0454545	0.272727	0.409091	0	0.0454545	0.227273	0	0	['ex', 'oli']	['ex', 'inh', 'oli']
6875	ENSG00000291593	full-splice_match	0	0.368421	0.157895	0.0526316	0	0.421053	0	0	0	0.25	0.5	0	0	0.25	0	0	['ex', 'inh', 'mic', 'oli']	['ex', 'inh', 'oli']
6884	ANKRD36B	incomplete-splice_match	0.111111	0	0.111111	0	0.111111	0.666667	0	0	0	0.25	0.375	0	0	0.375	0	0	['ast', 'inh', 'opc', 'oli']	['ex', 'inh', 'oli']
6887	ANKRD36B	incomplete-splice_match	0	0	0	0	0	1	0	0	0.117647	0.205882	0.0294118	0	0	0.647059	0	0	['oli']	['ast', 'ex', 'oli']
6897	ANKRD36B	incomplete-splice_match	0	0.25	0.5	0	0	0.25	0	0	0	0.333333	0	0	0	0.666667	0	0	['ex', 'inh', 'oli']	['ex', 'oli']
6899	ANKRD36B	incomplete-splice_match	0	0.571429	0.285714	0	0	0.142857	0	0	0	0.478261	0.26087	0	0	0.173913	0.0869565	0	['ex', 'inh', 'oli']	['ex', 'inh', 'oli', 'per']
6906	COX5B	incomplete-splice_match	0	0.4	0.133333	0	0	0.4	0	0.0666667	0.0769231	0.192308	0.115385	0.0769231	0.115385	0.423077	0	0	['ex', 'end', 'inh', 'oli']	['ast', 'ex', 'inh', 'mic', 'opc', 'oli']
6911	COX5B	novel_in_catalog	0.333333	0.333333	0.333333	0	0	0	0	0	0	0.537037	0.166667	0.0185185	0.0555556	0.222222	0	0	['ast', 'ex', 'inh']	['ex', 'inh', 'opc', 'oli']
6912	COX5B	full-splice_match	0.040404	0.190365	0.0753691	0.011655	0.030303	0.638695	0.002331	0.010878	0.0394265	0.13859	0.102748	0.0197133	0.0274791	0.669654	0	0.00238949	['ex', 'inh', 'oli']	['ex', 'inh', 'oli']
6925	ACTR1B	full-splice_match	0.040404	0.010101	0.0505051	0.030303	0.0505051	0.808081	0.010101	0	0	0.0408163	0.0612245	0.0612245	0.0612245	0.77551	0	0	['inh', 'opc', 'oli']	['inh', 'mic', 'opc', 'oli']
6930	TMEM131	full-splice_match	0	0.625	0.125	0	0	0.25	0	0	0.0588235	0.323529	0.132353	0.0147059	0.0147059	0.455882	0	0	['ex', 'inh', 'oli']	['ast', 'ex', 'inh', 'oli']
6932	TMEM131	incomplete-splice_match	0	0.428571	0.142857	0	0	0.428571	0	0	0.0909091	0.181818	0.0909091	0	0	0.636364	0	0	['ex', 'inh', 'oli']	['ast', 'ex', 'inh', 'oli']
6937	TMEM131	incomplete-splice_match	0	0.857143	0	0	0.142857	0	0	0	0	0.333333	0.111111	0	0	0.555556	0	0	['ex', 'opc']	['ex', 'inh', 'oli']
6949	TMEM131	incomplete-splice_match	0	0	0	0	0	0.75	0	0.25	0	0.2	0.4	0	0	0.4	0	0	['end', 'oli']	['ex', 'inh', 'oli']
6964	TPRKB	full-splice_match	0.166667	0	0	0	0	0.833333	0	0	0.0571429	0.171429	0.0571429	0.0285714	0.0285714	0.657143	0	0	['ast', 'oli']	['ast', 'ex', 'inh', 'oli']
6971	DUSP11	full-splice_match	0.166667	0.666667	0	0	0	0.166667	0	0	0	0.5	0	0	0	0.5	0	0	['ast', 'ex', 'oli']	['ex', 'oli']
6972	DUSP11	incomplete-splice_match	0	0.272727	0.0909091	0.0909091	0	0.454545	0	0.0909091	0	0.470588	0.235294	0.0588235	0	0.235294	0	0	['ex', 'end', 'inh', 'mic', 'oli']	['ex', 'inh', 'mic', 'oli']
6977	RTP4	full-splice_match	0	0	0	0.166667	0	0.833333	0	0	0.1	0	0	0.2	0.1	0.6	0	0	['mic', 'oli']	['ast', 'mic', 'opc', 'oli']
6978	CNOT10	incomplete-splice_match	0.285714	0.142857	0.142857	0.142857	0	0.285714	0	0	0.0833333	0.416667	0.0833333	0.166667	0	0.25	0	0	['ast', 'ex', 'inh', 'mic', 'oli']	['ast', 'ex', 'inh', 'mic', 'oli']
6979	CNOT10	incomplete-splice_match	0	0.25	0.125	0	0.25	0.375	0	0	0.111111	0.222222	0.111111	0	0	0.555556	0	0	['ex', 'inh', 'opc', 'oli']	['ast', 'ex', 'inh', 'oli']
6981	CNOT10	incomplete-splice_match	0.2	0.6	0.2	0	0	0	0	0	0.25	0	0.25	0	0	0.5	0	0	['ast', 'ex', 'inh']	['ast', 'inh', 'oli']
6982	SUGT1P2	full-splice_match	0	0.111111	0.333333	0.111111	0	0.444444	0	0	0.125	0.25	0.25	0	0.125	0.25	0	0	['ex', 'inh', 'mic', 'oli']	['ast', 'ex', 'inh', 'opc', 'oli']
6983	CNOT10	incomplete-splice_match	0	0	0.230769	0	0	0.769231	0	0	0	0	0	0	0.333333	0.666667	0	0	['inh', 'oli']	['opc', 'oli']
6984	CNOT10	incomplete-splice_match	0	0	0	0	0	1	0	0	0.111111	0	0.222222	0.111111	0	0.555556	0	0	['oli']	['ast', 'inh', 'mic', 'oli']
6985	CNOT10	full-splice_match	0	1	0	0	0	0	0	0	0.0625	0.6875	0.0625	0	0	0.1875	0	0	['ex']	['ast', 'ex', 'inh', 'oli']
6998	ITGA9-AS1	full-splice_match	0	0.666667	0	0	0	0.333333	0	0	0.142857	0.428571	0.380952	0	0	0.047619	0	0	['ex', 'oli']	['ast', 'ex', 'inh']
7003	ITGA9-AS1	full-splice_match	0.133333	0.4	0.333333	0	0.0666667	0.0666667	0	0	0.153846	0.461538	0.153846	0	0.0769231	0.0769231	0.0769231	0	['ast', 'ex', 'inh', 'opc', 'oli']	['ast', 'ex', 'inh', 'opc', 'oli', 'per']
7008	RPS3A	full-splice_match	0.0419501	0.156463	0.0634921	0.031746	0.0351474	0.660998	0.00226757	0.00793651	0.0379147	0.184834	0.122275	0.0454976	0.0445498	0.553555	0.000947867	0.0104265	['ex', 'inh', 'oli']	['ex', 'inh', 'oli']
7009	RPS3A	incomplete-splice_match	0	0.157895	0.157895	0	0	0.684211	0	0	0.0810811	0.135135	0.135135	0.216216	0.0540541	0.378378	0	0	['ex', 'inh', 'oli']	['ast', 'ex', 'inh', 'mic', 'opc', 'oli']
7010	RPS3A	incomplete-splice_match	0.0588235	0.323529	0.0294118	0.235294	0.0294118	0.294118	0	0.0294118	0.115385	0.269231	0.0769231	0.0769231	0	0.384615	0	0.0769231	['ast', 'ex', 'mic', 'oli']	['ast', 'ex', 'end', 'inh', 'mic', 'oli']
7013	RPS3A	incomplete-splice_match	0.0294118	0.441176	0.0588235	0	0.0294118	0.411765	0	0.0294118	0.030303	0.333333	0.181818	0.121212	0	0.333333	0	0	['ex', 'inh', 'oli']	['ex', 'inh', 'mic', 'oli']
7022	RPS3A	incomplete-splice_match	0.0263158	0.368421	0.0263158	0.0526316	0.0263158	0.5	0	0	0.0689655	0.172414	0.172414	0.0689655	0.0344828	0.448276	0	0.0344828	['ex', 'mic', 'oli']	['ast', 'ex', 'inh', 'mic', 'oli']
7023	RPS3A	full-splice_match	0	0.0967742	0.0322581	0.0322581	0.0322581	0.806452	0	0	0.0697674	0	0.0930233	0	0.0465116	0.790698	0	0	['ex', 'oli']	['ast', 'inh', 'oli']
7026	ENSG00000292159	full-splice_match	0.142857	0.142857	0.142857	0	0	0.571429	0	0	0	0	0.2	0	0	0.8	0	0	['ast', 'ex', 'inh', 'oli']	['inh', 'oli']
7039	SH3D19	incomplete-splice_match	0	0.0322581	0	0	0	0.967742	0	0	0	0	0.0322581	0	0	0.967742	0	0	['oli']	['oli']
7049	MED10	full-splice_match	0.0697674	0.377907	0.110465	0	0.0348837	0.383721	0.00581395	0.0174419	0.0481283	0.304813	0.122995	0.026738	0.0534759	0.433155	0	0.0106952	['ast', 'ex', 'inh', 'oli']	['ex', 'inh', 'opc', 'oli']
7050	MED10	incomplete-splice_match	0	0.416667	0.0833333	0	0	0.5	0	0	0.0625	0.3125	0.1875	0	0	0.4375	0	0	['ex', 'inh', 'oli']	['ast', 'ex', 'inh', 'oli']
7051	MED10	full-splice_match	0.0422535	0.169014	0.056338	0.0140845	0.0422535	0.676056	0	0	0.0769231	0.315385	0.130769	0.0153846	0.0461538	0.415385	0	0	['ex', 'inh', 'oli']	['ast', 'ex', 'inh', 'oli']
7052	UBE2QL1	full-splice_match	0.0078125	0.585938	0.328125	0	0.0234375	0.046875	0.0078125	0	0	0.425532	0.489362	0	0	0.0638298	0.0212766	0	['ex', 'inh']	['ex', 'inh', 'oli']
7056	PCDHA3	full-splice_match	0.25	0	0.125	0	0.25	0.375	0	0	0	0	0.625	0	0	0.375	0	0	['ast', 'inh', 'opc', 'oli']	['inh', 'oli']
7057	PCDHA5	full-splice_match	0.0625	0.25	0.3125	0	0.125	0.25	0	0	0.176471	0.352941	0.294118	0	0.117647	0.0588235	0	0	['ast', 'ex', 'inh', 'opc', 'oli']	['ast', 'ex', 'inh', 'opc', 'oli']
7058	PCDHAC2	full-splice_match	0.2	0.4	0	0	0	0.4	0	0	0	0	0	0	0	1	0	0	['ast', 'ex', 'oli']	['oli']
7060	PCDHA6	full-splice_match	0.0666667	0.133333	0.266667	0	0.0666667	0.466667	0	0	0	0.333333	0.25	0	0.0833333	0.333333	0	0	['ast', 'ex', 'inh', 'opc', 'oli']	['ex', 'inh', 'opc', 'oli']
7061	PCDHA4	full-splice_match	0.1	0.15	0.45	0	0.05	0.25	0	0	0.142857	0.285714	0.5	0	0	0.0714286	0	0	['ast', 'ex', 'inh', 'opc', 'oli']	['ast', 'ex', 'inh', 'oli']
7062	PCDHA7	full-splice_match	0	0.428571	0	0	0	0.571429	0	0	0.0833333	0.333333	0.25	0	0.0833333	0.25	0	0	['ex', 'oli']	['ast', 'ex', 'inh', 'opc', 'oli']
7064	PCDHA9	full-splice_match	0.0434783	0.347826	0.304348	0	0	0.304348	0	0	0	0.5	0.285714	0	0	0.214286	0	0	['ex', 'inh', 'oli']	['ex', 'inh', 'oli']
7065	PCDHA10	full-splice_match	0.184211	0.0789474	0.210526	0	0.0789474	0.447368	0	0	0.148148	0.407407	0.111111	0	0.111111	0.222222	0	0	['ast', 'ex', 'inh', 'opc', 'oli']	['ast', 'ex', 'inh', 'opc', 'oli']
7068	PCDHAC1	full-splice_match	0.125	0.25	0.625	0	0	0	0	0	0	0.25	0.25	0	0.25	0.25	0	0	['ast', 'ex', 'inh']	['ex', 'inh', 'opc', 'oli']
7071	PCDHB2	full-splice_match	0.0701754	0.350877	0.140351	0	0.0526316	0.385965	0	0	0.0196078	0.254902	0.156863	0.0392157	0.196078	0.333333	0	0	['ast', 'ex', 'inh', 'opc', 'oli']	['ex', 'inh', 'opc', 'oli']
7072	PCDHB3	full-splice_match	0.0857143	0.428571	0.114286	0	0.114286	0.257143	0	0	0	0.59375	0.0625	0	0.09375	0.25	0	0	['ast', 'ex', 'inh', 'opc', 'oli']	['ex', 'inh', 'opc', 'oli']
7073	ENSG00000291675	full-splice_match	0.111111	0.222222	0.222222	0.111111	0.111111	0.222222	0	0	0	0.333333	0.333333	0	0	0.333333	0	0	['ast', 'ex', 'inh', 'mic', 'opc', 'oli']	['ex', 'inh', 'oli']
7074	PCDHB4	full-splice_match	0.107692	0.0923077	0.0923077	0	0.169231	0.538462	0	0	0.0909091	0.204545	0.113636	0	0.25	0.340909	0	0	['ast', 'ex', 'inh', 'opc', 'oli']	['ast', 'ex', 'inh', 'opc', 'oli']
7075	PCDHB5	full-splice_match	0.181818	0.212121	0.0606061	0	0.121212	0.424242	0	0	0.125	0.25	0.09375	0	0.125	0.40625	0	0	['ast', 'ex', 'inh', 'opc', 'oli']	['ast', 'ex', 'inh', 'opc', 'oli']
7077	PCDHB6	full-splice_match	0.5	0.125	0.0416667	0	0	0.333333	0	0	0.2	0.25	0.1	0	0.15	0.3	0	0	['ast', 'ex', 'oli']	['ast', 'ex', 'inh', 'opc', 'oli']
7079	ENSG00000291680	full-splice_match	0.6	0.2	0	0	0	0.2	0	0	0.2	0.2	0.3	0	0	0.3	0	0	['ast', 'ex', 'oli']	['ast', 'ex', 'inh', 'oli']
7080	PCDHB7	full-splice_match	0.09375	0.1875	0.21875	0	0.125	0.375	0	0	0.16129	0.16129	0.16129	0	0.129032	0.387097	0	0	['ast', 'ex', 'inh', 'opc', 'oli']	['ast', 'ex', 'inh', 'opc', 'oli']
7081	PCDHB16	full-splice_match	0.105263	0.131579	0.0789474	0	0.157895	0.526316	0	0	0.108108	0.162162	0.135135	0.027027	0.0540541	0.513514	0	0	['ast', 'ex', 'inh', 'opc', 'oli']	['ast', 'ex', 'inh', 'opc', 'oli']
7083	PCDHB9	full-splice_match	0.105263	0.315789	0.210526	0	0.105263	0.263158	0	0	0.166667	0.366667	0.2	0	0.0333333	0.233333	0	0	['ast', 'ex', 'inh', 'opc', 'oli']	['ast', 'ex', 'inh', 'oli']
7084	PCDHB10	full-splice_match	0.0625	0.203125	0.171875	0	0	0.5625	0	0	0.0526316	0.350877	0.333333	0	0.0350877	0.22807	0	0	['ast', 'ex', 'inh', 'oli']	['ast', 'ex', 'inh', 'oli']
7085	PCDHB8	full-splice_match	0	0.6	0.2	0	0	0.2	0	0	0	0.8	0	0	0	0.2	0	0	['ex', 'inh', 'oli']	['ex', 'oli']
7086	PCDHB11	full-splice_match	0.333333	0.2	0.2	0	0.0666667	0.2	0	0	0.210526	0.210526	0.263158	0	0	0.315789	0	0	['ast', 'ex', 'inh', 'opc', 'oli']	['ast', 'ex', 'inh', 'oli']
7087	PCDHB12	full-splice_match	0.272727	0.212121	0.121212	0	0.0909091	0.30303	0	0	0.142857	0.357143	0.178571	0.0714286	0.0714286	0.178571	0	0	['ast', 'ex', 'inh', 'opc', 'oli']	['ast', 'ex', 'inh', 'mic', 'opc', 'oli']
7088	PCDHB13	full-splice_match	0.194444	0.305556	0.138889	0	0.0555556	0.305556	0	0	0.0434783	0.304348	0.217391	0	0.130435	0.304348	0	0	['ast', 'ex', 'inh', 'opc', 'oli']	['ex', 'inh', 'opc', 'oli']
7089	PCDHB14	full-splice_match	0.0909091	0.5	0.121212	0	0	0.287879	0	0	0.046875	0.34375	0.28125	0	0.125	0.1875	0.015625	0	['ast', 'ex', 'inh', 'oli']	['ex', 'inh', 'opc', 'oli']
7090	PCDHB18P	full-splice_match	0.166667	0.166667	0.333333	0	0	0.333333	0	0	0	0.666667	0.111111	0	0.111111	0.111111	0	0	['ast', 'ex', 'inh', 'oli']	['ex', 'inh', 'opc', 'oli']
7093	PCDHB15	full-splice_match	0.037037	0.0555556	0.037037	0	0.185185	0.685185	0	0	0.151515	0.121212	0.212121	0	0.151515	0.363636	0	0	['ex', 'opc', 'oli']	['ast', 'ex', 'inh', 'opc', 'oli']
7096	BTN2A1	incomplete-splice_match	0	0.272727	0	0	0	0.727273	0	0	0	0.333333	0	0	0	0.666667	0	0	['ex', 'oli']	['ex', 'oli']
7100	HCG11	full-splice_match	0.0454545	0.5	0.25	0.0681818	0	0.113636	0.0227273	0	0.037037	0.444444	0.259259	0.185185	0	0.0740741	0	0	['ex', 'inh', 'mic', 'oli']	['ex', 'inh', 'mic', 'oli']
7101	HMGN4	full-splice_match	0.0227273	0.113636	0.136364	0.0227273	0.0909091	0.613636	0	0	0.0285714	0.257143	0.0857143	0.0428571	0.0714286	0.5	0.0142857	0	['ex', 'inh', 'opc', 'oli']	['ex', 'inh', 'opc', 'oli']
7102	ABT1	full-splice_match	0.0985915	0.225352	0.15493	0.0422535	0.0704225	0.408451	0	0	0.012987	0.363636	0.194805	0.038961	0.0519481	0.337662	0	0	['ast', 'ex', 'inh', 'opc', 'oli']	['ex', 'inh', 'opc', 'oli']
7103	ABT1	incomplete-splice_match	0	0	0	0	0.2	0.8	0	0	0	0.666667	0	0	0	0.333333	0	0	['opc', 'oli']	['ex', 'oli']
7112	LINC01445	full-splice_match	0.031746	0	0	0.015873	0	0.952381	0	0	0	0.0377358	0.0188679	0	0.0377358	0.90566	0	0	['oli']	['oli']
7119	C8orf33	full-splice_match	0.5	0	0	0	0	0.5	0	0	0.333333	0.333333	0	0.333333	0	0	0	0	['ast', 'oli']	['ast', 'ex', 'mic']
7122	RNF139	full-splice_match	0.0227273	0	0.0681818	0	0	0.909091	0	0	0	0.5	0.25	0	0	0.25	0	0	['inh', 'oli']	['ex', 'inh', 'oli']
7123	novelGene_TATDN1_AS	antisense	0.042735	0.153846	0.045584	0.00854701	0.034188	0.709402	0	0.00569801	0.0470163	0.0940325	0.108499	0.0144665	0.0379747	0.696203	0.00180832	0	['ex', 'oli']	['ex', 'inh', 'oli']
7124	novelGene_TATDN1_AS	antisense	0.0642202	0.201835	0.0642202	0.0458716	0	0.59633	0	0.0275229	0.0338983	0.101695	0.0903955	0.0282486	0.0508475	0.694915	0	0	['ast', 'ex', 'inh', 'oli']	['ex', 'inh', 'opc', 'oli']
7126	novelGene_TATDN1_AS	antisense	0	0	0.333333	0.333333	0	0.333333	0	0	0.1	0.1	0.3	0	0	0.5	0	0	['inh', 'mic', 'oli']	['ast', 'ex', 'inh', 'oli']
7139	TATDN1	incomplete-splice_match									0	0.125	0	0	0	0.875	0	0	[]	['ex', 'oli']
7152	TATDN1	full-splice_match	0.0277778	0	0.0277778	0	0.0277778	0.916667	0	0	0.04	0.08	0.12	0	0	0.76	0	0	['oli']	['ex', 'inh', 'oli']
7154	novelGene_MCPH1-DT_AS	antisense	0.222222	0.111111	0.333333	0	0.222222	0.111111	0	0	0	0.411765	0.176471	0	0.0588235	0.352941	0	0	['ast', 'ex', 'inh', 'opc', 'oli']	['ex', 'inh', 'opc', 'oli']
7155	novelGene_MCPH1-DT_AS	antisense	0.181818	0.272727	0	0	0.0909091	0.454545	0	0	0.181818	0.363636	0.181818	0	0.0909091	0.181818	0	0	['ast', 'ex', 'opc', 'oli']	['ast', 'ex', 'inh', 'opc', 'oli']
7161	MCPH1-DT	novel_in_catalog	0.333333	0	0	0	0	0.666667	0	0	0.1	0.1	0.3	0	0.1	0.4	0	0	['ast', 'oli']	['ast', 'ex', 'inh', 'opc', 'oli']
7163	MCPH1-DT	full-splice_match	0.0571429	0.314286	0.0571429	0.0285714	0.0571429	0.485714	0	0	0.0185185	0.314815	0.148148	0.0185185	0.0185185	0.481481	0	0	['ast', 'ex', 'inh', 'opc', 'oli']	['ex', 'inh', 'oli']
7170	IARS1	full-splice_match	0.181818	0	0	0	0.0909091	0.727273	0	0	0.102041	0.122449	0.142857	0.0204082	0.0408163	0.55102	0.0204082	0	['ast', 'opc', 'oli']	['ast', 'ex', 'inh', 'oli']
7179	IARS1	incomplete-splice_match	0.0909091	0.545455	0.0909091	0	0.0909091	0.181818	0	0	0	0.428571	0.285714	0	0	0.285714	0	0	['ast', 'ex', 'inh', 'opc', 'oli']	['ex', 'inh', 'oli']
7183	IARS1	incomplete-splice_match	0.0666667	0.133333	0.2	0.133333	0.133333	0.333333	0	0	0.0833333	0.166667	0.166667	0	0.0833333	0.5	0	0	['ast', 'ex', 'inh', 'mic', 'opc', 'oli']	['ast', 'ex', 'inh', 'opc', 'oli']
7185	IARS1	incomplete-splice_match	0.2	0.4	0	0.2	0.2	0	0	0	0	0.666667	0.333333	0	0	0	0	0	['ast', 'ex', 'mic', 'opc']	['ex', 'inh']
7186	IARS1	incomplete-splice_match	0.133333	0.3	0.0666667	0.1	0.0333333	0.366667	0	0	0.103448	0.206897	0.206897	0.0689655	0.0689655	0.344828	0	0	['ast', 'ex', 'inh', 'mic', 'oli']	['ast', 'ex', 'inh', 'mic', 'opc', 'oli']
7187	NOL8	incomplete-splice_match	0.285714	0.142857	0.0952381	0	0	0.428571	0	0.047619	0	0	0	0.25	0	0.75	0	0	['ast', 'ex', 'inh', 'oli']	['mic', 'oli']
7211	TOLLIP	full-splice_match	0.0384615	0.605769	0.0865385	0	0.0192308	0.230769	0	0.0192308	0.0576923	0.567308	0.182692	0.00961538	0.00961538	0.173077	0	0	['ex', 'inh', 'oli']	['ast', 'ex', 'inh', 'oli']
7214	TOLLIP-DT	full-splice_match	0.0357143	0.214286	0.107143	0	0.0357143	0.607143	0	0	0.0227273	0.227273	0.227273	0	0.0454545	0.477273	0	0	['ex', 'inh', 'oli']	['ex', 'inh', 'oli']
7217	MOB2	novel_in_catalog	0.04329	0.601732	0.108225	0.017316	0.021645	0.194805	0	0.012987	0.0510204	0.55102	0.112245	0.0204082	0	0.265306	0	0	['ex', 'inh', 'oli']	['ast', 'ex', 'inh', 'oli']
7218	MOB2	full-splice_match	0.0171429	0.365714	0.12	0.0114286	0.0114286	0.462857	0	0.0114286	0.018018	0.441441	0.108108	0.00900901	0	0.414414	0	0.00900901	['ex', 'inh', 'oli']	['ex', 'inh', 'oli']
7229	PFDN5	full-splice_match	0.0306122	0.234694	0.0714286	0.0612245	0.0204082	0.571429	0	0.0102041	0.0601504	0.18797	0.0902256	0.0902256	0.0225564	0.541353	0	0.0075188	['ex', 'inh', 'mic', 'oli']	['ast', 'ex', 'inh', 'mic', 'oli']
7230	PFDN5	incomplete-splice_match	0.0857143	0.257143	0.0857143	0.114286	0.0285714	0.428571	0	0	0.125	0.166667	0	0.0416667	0	0.666667	0	0	['ast', 'ex', 'inh', 'mic', 'oli']	['ast', 'ex', 'oli']
7243	PFDN5	full-splice_match	0.0917722	0.218354	0.101266	0.0474684	0.0174051	0.507911	0	0.0158228	0.0682111	0.258687	0.126126	0.032175	0.029601	0.482625	0	0.002574	['ast', 'ex', 'inh', 'oli']	['ast', 'ex', 'inh', 'oli']
7245	PFDN5	full-splice_match	0	0.5	0	0	0	0.5	0	0	0	1	0	0	0	0	0	0	['ex', 'oli']	['ex']
7251	PFDN5	novel_in_catalog	0.111888	0.265734	0.0769231	0.034965	0.041958	0.468531	0	0	0.0913706	0.390863	0.182741	0.035533	0.0253807	0.274112	0	0	['ast', 'ex', 'inh', 'oli']	['ast', 'ex', 'inh', 'oli']
7252	PFDN5	full-splice_match	0.125	0.1875	0.0625	0	0	0.625	0	0	0.0666667	0.2	0	0	0	0.733333	0	0	['ast', 'ex', 'inh', 'oli']	['ast', 'ex', 'oli']
7255	MYG1	full-splice_match	0.0648649	0.0432432	0.0972973	0.0324324	0.0648649	0.697297	0	0	0.0368098	0.365031	0.193252	0.0122699	0.0429448	0.349693	0	0	['ast', 'inh', 'opc', 'oli']	['ex', 'inh', 'oli']
7256	MYG1	full-splice_match	0	0.583333	0.0833333	0	0	0.333333	0	0	0.133333	0.333333	0.0666667	0	0	0.466667	0	0	['ex', 'inh', 'oli']	['ast', 'ex', 'inh', 'oli']
7261	MYG1	full-splice_match	0	0.692308	0.307692	0	0	0	0	0	0	0.583333	0.0833333	0	0	0.25	0.0833333	0	['ex', 'inh']	['ex', 'inh', 'oli', 'per']
7266	MYG1	full-splice_match	0	0.333333	0.333333	0	0	0.333333	0	0	0.181818	0.454545	0.272727	0	0	0.0909091	0	0	['ex', 'inh', 'oli']	['ast', 'ex', 'inh', 'oli']
7268	MYG1	novel_in_catalog	0	1	0	0	0	0	0	0	0	0	0.5	0	0	0.5	0	0	['ex']	['inh', 'oli']
7281	ENSG00000291782	full-splice_match	0.0625	0.3125	0.4375	0	0	0.1875	0	0	0	0.857143	0.107143	0	0	0.0357143	0	0	['ast', 'ex', 'inh', 'oli']	['ex', 'inh']
7282	TTC5	full-splice_match	0.0677966	0.372881	0.20339	0.0169492	0.0169492	0.322034	0	0	0.0769231	0.32967	0.263736	0.021978	0.010989	0.296703	0	0	['ast', 'ex', 'inh', 'oli']	['ast', 'ex', 'inh', 'oli']
7285	TTC5	full-splice_match	0.0769231	0.461538	0.153846	0	0	0.307692	0	0	0	0.9	0	0	0	0.1	0	0	['ast', 'ex', 'inh', 'oli']	['ex', 'oli']
7290	CCNB1IP1	incomplete-splice_match	0.142857	0.142857	0.142857	0	0	0.571429	0	0	0.2	0	0.6	0	0	0.2	0	0	['ast', 'ex', 'inh', 'oli']	['ast', 'inh', 'oli']
7294	CCNB1IP1	incomplete-splice_match	0	0.363636	0.181818	0.0909091	0	0.363636	0	0	0	0.25	0.125	0	0	0.625	0	0	['ex', 'inh', 'mic', 'oli']	['ex', 'inh', 'oli']
7296	CCNB1IP1	full-splice_match	0.173913	0.108696	0.217391	0.0217391	0.0434783	0.413043	0	0.0217391	0.030303	0.434343	0.292929	0.010101	0.0505051	0.181818	0	0	['ast', 'ex', 'inh', 'oli']	['ex', 'inh', 'opc', 'oli']
7301	RPPH1	full-splice_match	0.0377358	0.283019	0.150943	0.0188679	0.0377358	0.471698	0	0	0	0.358974	0.128205	0	0.0512821	0.461538	0	0	['ex', 'inh', 'oli']	['ex', 'inh', 'opc', 'oli']
7309	PARP2	incomplete-splice_match	0.2	0	0.2	0	0	0.6	0	0	0.285714	0.428571	0	0	0	0.285714	0	0	['ast', 'inh', 'oli']	['ast', 'ex', 'oli']
7316	OSGEP	full-splice_match	0	0.5	0	0.5	0	0	0	0	0.214286	0.142857	0.142857	0.214286	0.0714286	0.214286	0	0	['ex', 'mic']	['ast', 'ex', 'inh', 'mic', 'opc', 'oli']
7319	OSGEP	novel_not_in_catalog	1	0	0	0	0	0	0	0	0	0.428571	0.142857	0	0	0.428571	0	0	['ast']	['ex', 'inh', 'oli']
7320	OSGEP	incomplete-splice_match	0.5	0.25	0	0	0	0.25	0	0	0	0.190476	0.380952	0	0.047619	0.380952	0	0	['ast', 'ex', 'oli']	['ex', 'inh', 'oli']
7324	APEX1	full-splice_match	0.0461538	0.246154	0.107692	0.0153846	0.0461538	0.538462	0	0	0.0721649	0.0309278	0.0618557	0.0618557	0.0618557	0.690722	0.0103093	0.0103093	['ex', 'inh', 'oli']	['ast', 'inh', 'mic', 'opc', 'oli']
7326	APEX1	full-splice_match	0.162162	0.0540541	0.0810811	0.027027	0.0540541	0.621622	0	0	0.025	0.45	0.15	0.05	0.075	0.25	0	0	['ast', 'ex', 'inh', 'opc', 'oli']	['ex', 'inh', 'mic', 'opc', 'oli']
7329	APEX1	incomplete-splice_match	0.1	0.2	0	0.1	0	0.5	0	0.1	0.0555556	0	0.111111	0	0.0555556	0.777778	0	0	['ast', 'ex', 'end', 'mic', 'oli']	['ast', 'inh', 'opc', 'oli']
7330	APEX1	incomplete-splice_match	0.142857	0.285714	0	0.142857	0	0.428571	0	0	0.333333	0	0.333333	0.333333	0	0	0	0	['ast', 'ex', 'mic', 'oli']	['ast', 'inh', 'mic']
7334	PIP4P1	incomplete-splice_match	0	0.5	0	0	0	0.5	0	0	0	0.2	0.1	0	0	0.7	0	0	['ex', 'oli']	['ex', 'inh', 'oli']
7337	PIP4P1	full-splice_match	0.037037	0.0740741	0	0.111111	0.037037	0.740741	0	0	0.148936	0.255319	0.106383	0.0638298	0.0212766	0.382979	0.0212766	0	['ex', 'mic', 'oli']	['ast', 'ex', 'inh', 'mic', 'oli']
7339	PIP4P1	full-splice_match	0.0833333	0.333333	0.114583	0.0520833	0.0520833	0.364583	0	0	0.0714286	0.314286	0.0714286	0.0571429	0.0142857	0.471429	0	0	['ast', 'ex', 'inh', 'mic', 'opc', 'oli']	['ast', 'ex', 'inh', 'mic', 'oli']
7342	PNP	full-splice_match	0.285714	0	0.0714286	0.285714	0.142857	0.142857	0	0.0714286	0.222222	0	0	0.111111	0.555556	0.111111	0	0	['ast', 'end', 'inh', 'mic', 'opc', 'oli']	['ast', 'mic', 'opc', 'oli']
7344	SH3GL3	full-splice_match	0.0210526	0.715789	0.136842	0	0	0.126316	0	0	0	0.025641	0.102564	0	0	0.871795	0	0	['ex', 'inh', 'oli']	['inh', 'oli']
7345	SH3GL3	full-splice_match	0	0	0.0227273	0	0	0.977273	0	0	0	0.3125	0.21875	0	0	0.46875	0	0	['oli']	['ex', 'inh', 'oli']
7346	SH3GL3	incomplete-splice_match	0	0.205128	0.0769231	0	0	0.717949	0	0	0.00847458	0.0762712	0.0423729	0	0	0.872881	0	0	['ex', 'inh', 'oli']	['ex', 'oli']
7350	SH3GL3	incomplete-splice_match	0	0.111111	0	0	0.111111	0.777778	0	0	0	0.130435	0.0869565	0	0	0.782609	0	0	['ex', 'opc', 'oli']	['ex', 'inh', 'oli']
7352	SH3GL3	full-splice_match	0	0.129032	0.0645161	0	0	0.806452	0	0	0.0333333	0.0666667	0.0666667	0	0	0.833333	0	0	['ex', 'inh', 'oli']	['ex', 'inh', 'oli']
7360	SH3GL3	incomplete-splice_match	0	0.454545	0.0909091	0	0	0.454545	0	0	0	0.740741	0.0740741	0	0	0.185185	0	0	['ex', 'inh', 'oli']	['ex', 'inh', 'oli']
7362	SH3GL3	incomplete-splice_match	0	0.133333	0.2	0	0	0.666667	0	0	0	0.037037	0.0740741	0	0	0.888889	0	0	['ex', 'inh', 'oli']	['inh', 'oli']
7366	SH3GL3	incomplete-splice_match	0	0	0.333333	0	0	0.666667	0	0	0	0.181818	0.181818	0	0	0.636364	0	0	['inh', 'oli']	['ex', 'inh', 'oli']
7391	ENSG00000291627	full-splice_match	0.133333	0.133333	0	0.0666667	0	0.666667	0	0	0.142857	0	0.214286	0.0714286	0.142857	0.428571	0	0	['ast', 'ex', 'mic', 'oli']	['ast', 'inh', 'mic', 'opc', 'oli']
7395	EGLN1P1	full-splice_match	0.25	0.375	0	0	0.125	0.25	0	0	0	0.333333	0	0	0.111111	0.555556	0	0	['ast', 'ex', 'opc', 'oli']	['ex', 'opc', 'oli']
7404	NMB	full-splice_match	0.388889	0.111111	0.111111	0.0277778	0.0277778	0.333333	0	0	0.333333	0.111111	0	0	0.111111	0.444444	0	0	['ast', 'ex', 'inh', 'oli']	['ast', 'ex', 'opc', 'oli']
7406	NOP10	full-splice_match	0.0362117	0.281337	0.103064	0.0584958	0.0501393	0.456825	0	0.0139276	0.0638889	0.272222	0.130556	0.0638889	0.0472222	0.405556	0.00555556	0.0111111	['ex', 'inh', 'mic', 'opc', 'oli']	['ast', 'ex', 'inh', 'mic', 'oli']
7409	LPCAT4	full-splice_match	0	0.6	0.4	0	0	0	0	0	0.333333	0.333333	0.333333	0	0	0	0	0	['ex', 'inh']	['ast', 'ex', 'inh']
7411	LPCAT4	incomplete-splice_match	0.027027	0.610811	0.313514	0	0	0.0486486	0	0	0.0171233	0.633562	0.287671	0.00342466	0.00684932	0.0513699	0	0	['ex', 'inh']	['ex', 'inh', 'oli']
7412	LPCAT4	full-splice_match	0.109091	0.163636	0.0727273	0.0363636	0.0727273	0.545455	0	0	0	0.409836	0.42623	0	0.0163934	0.147541	0	0	['ast', 'ex', 'inh', 'opc', 'oli']	['ex', 'inh', 'oli']
7424	GOLGA8A	incomplete-splice_match	0	1	0	0	0	0	0	0	0.142857	0.428571	0.214286	0	0	0.214286	0	0	['ex']	['ast', 'ex', 'inh', 'oli']
7426	ENSG00000291992	full-splice_match	0.09375	0.53125	0.125	0	0.09375	0.15625	0	0	0.0625	0.625	0.25	0	0.0625	0	0	0	['ast', 'ex', 'inh', 'opc', 'oli']	['ast', 'ex', 'inh', 'opc']
7428	MSRB1	full-splice_match	0.045977	0.0229885	0.0229885	0.0344828	0.0344828	0.83908	0	0	0.0714286	0.190476	0.0714286	0.0952381	0.047619	0.52381	0	0	['oli']	['ast', 'ex', 'inh', 'mic', 'oli']
7431	NDUFB10	full-splice_match	0.050571	0.231648	0.0929853	0.00815661	0.0309951	0.577488	0.00326264	0.00489396	0.0532995	0.158629	0.114213	0.0139594	0.0291878	0.624365	0.00126904	0.00507614	['ast', 'ex', 'inh', 'oli']	['ast', 'ex', 'inh', 'oli']
7433	NDUFB10	full-splice_match	0.0595238	0.130952	0.0119048	0.0357143	0.047619	0.702381	0	0.0119048	0.0701754	0.175439	0.0877193	0	0.0350877	0.631579	0	0	['ast', 'ex', 'oli']	['ast', 'ex', 'inh', 'oli']
7439	SNHG9	full-splice_match	0.116022	0.279006	0.0902394	0.0156538	0.0276243	0.468692	0	0.00276243	0.0859301	0.29084	0.10576	0.0169972	0.0339943	0.463645	0.00188857	0.000944287	['ast', 'ex', 'inh', 'oli']	['ast', 'ex', 'inh', 'oli']
7440	SNHG9	full-splice_match	0.109589	0.30137	0.0684932	0.0547945	0.0547945	0.410959	0	0	0.119403	0.358209	0.0895522	0.0746269	0.0298507	0.328358	0	0	['ast', 'ex', 'inh', 'mic', 'opc', 'oli']	['ast', 'ex', 'inh', 'mic', 'oli']
7444	RPS2	incomplete-splice_match	0	0	0	1	0	0	0	0	0	0.5	0.166667	0	0	0.333333	0	0	['mic']	['ex', 'inh', 'oli']
7445	RPS2	full-splice_match	0.0408163	0.155612	0.0739796	0.067602	0.0318878	0.612245	0.00127551	0.0165816	0.0221059	0.17452	0.109366	0.08726	0.0430483	0.557882	0.00116347	0.00465387	['ex', 'inh', 'mic', 'oli']	['ex', 'inh', 'mic', 'oli']
7446	ENSG00000291934	full-splice_match	0.0777778	0.588889	0.177778	0.0222222	0.0111111	0.122222	0	0	0	0.5	0	0	0.25	0.25	0	0	['ast', 'ex', 'inh', 'oli']	['ex', 'opc', 'oli']
7448	RPS2	incomplete-splice_match	0.176471	0	0.0588235	0.0588235	0.0588235	0.647059	0	0	0	0.111111	0.222222	0.111111	0	0.555556	0	0	['ast', 'inh', 'mic', 'opc', 'oli']	['ex', 'inh', 'mic', 'oli']
7450	RPS2	incomplete-splice_match	0	0.117647	0.0588235	0.0588235	0.0588235	0.647059	0	0.0588235	0.0588235	0.117647	0.0588235	0.235294	0.0588235	0.411765	0	0.0588235	['ex', 'end', 'inh', 'mic', 'opc', 'oli']	['ast', 'ex', 'end', 'inh', 'mic', 'opc', 'oli']
7454	ENSG00000291937	full-splice_match	0.117117	0.216216	0.036036	0.036036	0.018018	0.576577	0	0	0.1	0.25	0.0833333	0.025	0.0166667	0.525	0	0	['ast', 'ex', 'oli']	['ast', 'ex', 'inh', 'oli']
7459	GFER	full-splice_match	0.0666667	0.333333	0.0666667	0	0.0666667	0.466667	0	0	0.09375	0.03125	0.1875	0	0.09375	0.59375	0	0	['ast', 'ex', 'inh', 'opc', 'oli']	['ast', 'inh', 'opc', 'oli']
7464	SYNGR3	full-splice_match	0.0188679	0.603774	0.345912	0	0	0.0314465	0	0	0	0.587302	0.396825	0	0	0.015873	0	0	['ex', 'inh']	['ex', 'inh']
7465	ZNF598	incomplete-splice_match	0.2	0.4	0.2	0	0	0.2	0	0	0	0.2	0.2	0	0	0.6	0	0	['ast', 'ex', 'inh', 'oli']	['ex', 'inh', 'oli']
7467	NPW	full-splice_match	0.2	0.2	0.4	0	0	0.2	0	0	0	0.533333	0.4	0	0	0.0666667	0	0	['ast', 'ex', 'inh', 'oli']	['ex', 'inh', 'oli']
7483	C16orf46	novel_in_catalog	0	0.529412	0.0588235	0	0	0.411765	0	0	0	0	0	0	0	1	0	0	['ex', 'inh', 'oli']	['oli']
7484	CMC2	full-splice_match	0.0731707	0.585366	0.121951	0	0	0.219512	0	0	0	0.133333	0.2	0	0	0.666667	0	0	['ast', 'ex', 'inh', 'oli']	['ex', 'inh', 'oli']
7494	GCSH	full-splice_match	0.0634921	0.0674603	0.0357143	0.00793651	0.0555556	0.765873	0	0.00396825	0.0612245	0.0787172	0.058309	0.0058309	0.0524781	0.740525	0.00291545	0	['ast', 'ex', 'opc', 'oli']	['ast', 'ex', 'inh', 'opc', 'oli']
7496	GCSH	novel_in_catalog	0	0	0	0	0	1	0	0	0.0416667	0	0	0	0.0833333	0.875	0	0	['oli']	['opc', 'oli']
7503	GCSH	full-splice_match	0.153846	0	0.0769231	0	0	0.769231	0	0	0	0.142857	0	0	0.047619	0.809524	0	0	['ast', 'inh', 'oli']	['ex', 'oli']
7506	CMC2	full-splice_match	0.0657895	0.105263	0	0.0394737	0.0394737	0.736842	0	0.0131579	0.0493827	0.0246914	0.037037	0.0123457	0	0.876543	0	0	['ast', 'ex', 'oli']	['oli']
7507	CMC2	incomplete-splice_match	0	0.428571	0.142857	0	0	0.428571	0	0	0	0.769231	0.0769231	0	0	0.153846	0	0	['ex', 'inh', 'oli']	['ex', 'inh', 'oli']
7509	GCSH	incomplete-splice_match	0.1	0.1	0.05	0	0.05	0.7	0	0	0.0769231	0.153846	0	0	0.115385	0.653846	0	0	['ast', 'ex', 'inh', 'opc', 'oli']	['ast', 'ex', 'opc', 'oli']
7518	ENSG00000291962	full-splice_match	0.333333	0.5	0.166667	0	0	0	0	0	0.4	0.6	0	0	0	0	0	0	['ast', 'ex', 'inh']	['ast', 'ex']
7520	CMC2	novel_in_catalog	0.142857	0.142857	0	0	0	0.714286	0	0	0.333333	0.333333	0.166667	0	0.166667	0	0	0	['ast', 'ex', 'oli']	['ast', 'ex', 'inh', 'opc']
7523	CMC2	novel_in_catalog	0.15	0.0166667	0.05	0	0.05	0.733333	0	0	0.0166667	0.05	0.0333333	0.0166667	0.0166667	0.866667	0	0	['ast', 'inh', 'opc', 'oli']	['ex', 'oli']
7525	CMC2	full-splice_match	0.0357143	0.107143	0.0357143	0	0	0.785714	0	0.0357143	0	0.26087	0.0869565	0	0.0434783	0.608696	0	0	['ex', 'oli']	['ex', 'inh', 'oli']
7526	CMC2	novel_in_catalog	0	0.2	0.0666667	0	0.0333333	0.7	0	0	0	0.0434783	0.0434783	0	0.0434783	0.869565	0	0	['ex', 'inh', 'oli']	['oli']
7527	CMC2	novel_in_catalog	0	0.333333	0	0	0	0.666667	0	0	0.125	0.375	0	0.0625	0	0.4375	0	0	['ex', 'oli']	['ast', 'ex', 'mic', 'oli']
7529	ENSG00000291949	full-splice_match	0.105263	0.368421	0	0.105263	0	0.421053	0	0	0	0.318182	0.227273	0	0.0909091	0.363636	0	0	['ast', 'ex', 'mic', 'oli']	['ex', 'inh', 'opc', 'oli']
7531	CMC2	incomplete-splice_match	0.0833333	0.0833333	0	0	0	0.833333	0	0	0.05	0.15	0.05	0.05	0	0.7	0	0	['ast', 'ex', 'oli']	['ast', 'ex', 'inh', 'mic', 'oli']
7536	GAA	full-splice_match	0.12	0.32	0.28	0.08	0	0.2	0	0	0	0.363636	0.0909091	0	0	0.545455	0	0	['ast', 'ex', 'inh', 'mic', 'oli']	['ex', 'inh', 'oli']
7537	GAA	incomplete-splice_match	0.217742	0.0322581	0.0725806	0.185484	0.0725806	0.419355	0	0	0.11215	0.327103	0.158879	0.11215	0.0373832	0.252336	0	0	['ast', 'inh', 'mic', 'opc', 'oli']	['ast', 'ex', 'inh', 'mic', 'oli']
7539	EIF4A3	full-splice_match	0.030303	0.030303	0.030303	0.030303	0.106061	0.757576	0	0.0151515	0.0526316	0.171053	0.0263158	0.105263	0.0657895	0.578947	0	0	['opc', 'oli']	['ast', 'ex', 'mic', 'opc', 'oli']
7545	ENSG00000291511	full-splice_match	0.27907	0.418605	0.139535	0.0465116	0.0232558	0.0930233	0	0	0.150685	0.424658	0.273973	0	0.0136986	0.136986	0	0	['ast', 'ex', 'inh', 'oli']	['ast', 'ex', 'inh', 'oli']
7560	DPRXP4	full-splice_match	0.363636	0	0	0.454545	0.0909091	0.0909091	0	0	0.3	0	0	0.3	0.1	0.3	0	0	['ast', 'mic', 'opc', 'oli']	['ast', 'mic', 'opc', 'oli']
7565	ENSG00000291728	full-splice_match	0.318182	0.181818	0.0454545	0.0909091	0	0.363636	0	0	0.204082	0.183673	0.142857	0.0408163	0.0408163	0.387755	0	0	['ast', 'ex', 'mic', 'oli']	['ast', 'ex', 'inh', 'oli']
7585	OMG	full-splice_match	0	0	0	0	0.25	0.75	0	0	0	1	0	0	0	0	0	0	['opc', 'oli']	['ex']
7588	OMG	full-splice_match	0.00897666	0.10772	0.0251346	0	0.0520646	0.804309	0	0.00179533	0.0299252	0.104738	0.0461347	0.00374065	0.0648379	0.750623	0	0	['ex', 'opc', 'oli']	['ex', 'opc', 'oli']
7594	OMG	full-splice_match	0.0247934	0.115702	0.0413223	0.00413223	0.0909091	0.72314	0	0	0.0277778	0.263889	0.111111	0	0.0555556	0.541667	0	0	['ex', 'opc', 'oli']	['ex', 'inh', 'opc', 'oli']
7600	ENSG00000291722	novel_not_in_catalog	0.00911458	0.00651042	0.00130208	0.0208333	0.00651042	0.955729	0	0	0.0101302	0.0144718	0.00723589	0.0188133	0.00289436	0.946454	0	0	['oli']	['oli']
7610	LINC03048	full-splice_match	0.0243902	0.0139373	0.00348432	0.00348432	0.0243902	0.930314	0	0	0.0133333	0.0133333	0.00266667	0.00266667	0.0506667	0.917333	0	0	['oli']	['opc', 'oli']
7612	LINC03048	incomplete-splice_match	0.0185185	0	0	0	0.0555556	0.925926	0	0	0	0	0	0	0.0617284	0.938272	0	0	['opc', 'oli']	['opc', 'oli']
7613	LINC03048	full-splice_match	0	0	0	0	0.0243902	0.97561	0	0	0.0224719	0.0337079	0.011236	0	0.0337079	0.898876	0	0	['oli']	['oli']
7614	LINC03048	full-splice_match	0	0	0.0227273	0	0.0227273	0.954545	0	0	0.0108696	0.0326087	0	0	0.0434783	0.913043	0	0	['oli']	['oli']
7615	ENSG00000291411	full-splice_match	0.142857	0	0.142857	0	0	0.714286	0	0	0	0.1875	0.1875	0	0.1875	0.4375	0	0	['ast', 'inh', 'oli']	['ex', 'inh', 'opc', 'oli']
7617	BAHCC1	full-splice_match	0.0266667	0.56	0.253333	0	0	0.16	0	0	0.0246914	0.481481	0.333333	0	0.0123457	0.148148	0	0	['ex', 'inh', 'oli']	['ex', 'inh', 'oli']
7618	BAHCC1	full-splice_match	0.0588235	0.588235	0.117647	0	0	0.235294	0	0	0.1	0.55	0.3	0	0	0.05	0	0	['ast', 'ex', 'inh', 'oli']	['ast', 'ex', 'inh', 'oli']
7622	LINC01971	full-splice_match	0	0.2	0.2	0	0	0.6	0	0	0	1	0	0	0	0	0	0	['ex', 'inh', 'oli']	['ex']
7623	ACTG1	full-splice_match	0.10347	0.223048	0.0947955	0.0309789	0.0607187	0.475836	0.00247831	0.0086741	0.0908435	0.202596	0.106705	0.0338861	0.0583994	0.50036	0.000720981	0.00648882	['ast', 'ex', 'inh', 'opc', 'oli']	['ast', 'ex', 'inh', 'opc', 'oli']
7625	ACTG1	full-splice_match	0.25	0.25	0	0	0	0.5	0	0	0.0674847	0.478528	0.193252	0.0184049	0.0214724	0.217791	0	0.00306748	['ast', 'ex', 'oli']	['ast', 'ex', 'inh', 'oli']
7632	ACTG1	incomplete-splice_match	0.25	0	0.0833333	0.166667	0	0.5	0	0	0.5	0.5	0	0	0	0	0	0	['ast', 'inh', 'mic', 'oli']	['ast', 'ex']
7635	ACTG1	incomplete-splice_match	0.285714	0.428571	0	0	0	0.142857	0	0.142857	0	0.333333	0	0	0	0.666667	0	0	['ast', 'ex', 'end', 'oli']	['ex', 'oli']
7636	ACTG1	incomplete-splice_match	0.125	0.5	0	0	0	0.375	0	0	0	0.333333	0	0	0	0.666667	0	0	['ast', 'ex', 'oli']	['ex', 'oli']
7637	ACTG1	incomplete-splice_match	0.1	0.3	0	0	0.2	0.4	0	0	0.117647	0.147059	0.147059	0.0294118	0.0882353	0.470588	0	0	['ast', 'ex', 'opc', 'oli']	['ast', 'ex', 'inh', 'opc', 'oli']
7638	ACTG1	incomplete-splice_match	0.133333	0.133333	0.133333	0.0666667	0.0666667	0.466667	0	0	0	0.375	0.125	0	0.25	0.25	0	0	['ast', 'ex', 'inh', 'mic', 'opc', 'oli']	['ex', 'inh', 'opc', 'oli']
7642	GPRC5C	full-splice_match	1	0	0	0	0	0	0	0	0.4	0	0.2	0.1	0.3	0	0	0	['ast']	['ast', 'inh', 'mic', 'opc']
7646	GMFG	novel_not_in_catalog	0	0.2	0	0.4	0	0.2	0	0.2	0	0.222222	0.444444	0.111111	0	0.222222	0	0	['ex', 'end', 'mic', 'oli']	['ex', 'inh', 'mic', 'oli']
7648	GMFG	full-splice_match	0	0.0769231	0	0.769231	0	0.153846	0	0	0	0	0	0.785714	0	0.0714286	0	0.142857	['ex', 'mic', 'oli']	['end', 'mic', 'oli']
7649	ENSG00000291879	full-splice_match	0.072	0.262	0.082	0.066	0.042	0.476	0	0	0.0903226	0.275269	0.103226	0.0301075	0.0322581	0.468817	0	0	['ast', 'ex', 'inh', 'mic', 'oli']	['ast', 'ex', 'inh', 'oli']
7656	NDUFA11	novel_not_in_catalog	0.142857	0.142857	0.285714	0	0.142857	0.142857	0	0.142857	0.0434783	0.0869565	0.347826	0	0.0434783	0.478261	0	0	['ast', 'ex', 'end', 'inh', 'opc', 'oli']	['ex', 'inh', 'oli']
7660	NDUFA11	full-splice_match	0.0392749	0.229607	0.0891239	0.0226586	0.0256798	0.581571	0.00151057	0.010574	0.0281407	0.129648	0.134673	0.0160804	0.0331658	0.653266	0.00100503	0.0040201	['ex', 'inh', 'oli']	['ex', 'inh', 'oli']
7667	NDUFA11	full-splice_match	0.129032	0.483871	0.225806	0.0322581	0	0.129032	0	0	0.0980392	0.27451	0.196078	0.0196078	0.0588235	0.352941	0	0	['ast', 'ex', 'inh', 'oli']	['ast', 'ex', 'inh', 'opc', 'oli']
7668	NDUFA11	full-splice_match	0	0	0	0	0	1	0	0	0	0	0.0714286	0	0.142857	0.785714	0	0	['oli']	['inh', 'opc', 'oli']
7670	VMAC	full-splice_match	0.153846	0.230769	0.0769231	0.0769231	0	0.461538	0	0	0.2	0.2	0.0666667	0.0333333	0.0333333	0.466667	0	0	['ast', 'ex', 'inh', 'mic', 'oli']	['ast', 'ex', 'inh', 'oli']
7680	MROH8	incomplete-splice_match	0	0	0	0	0	1	0	0	0.0909091	0.545455	0.363636	0	0	0	0	0	['oli']	['ast', 'ex', 'inh']
7689	RPN2	incomplete-splice_match	0	0.375	0.125	0.125	0	0.375	0	0	0.25	0.25	0.125	0	0.25	0.125	0	0	['ex', 'inh', 'mic', 'oli']	['ast', 'ex', 'inh', 'opc', 'oli']
7694	RPN2	full-splice_match	0	0	0	0.181818	0.0909091	0.545455	0	0.181818	0.111111	0	0.0138889	0.208333	0.180556	0.458333	0	0.0277778	['end', 'mic', 'opc', 'oli']	['ast', 'mic', 'opc', 'oli']
7696	MANBAL	full-splice_match	0.049505	0.287129	0.158416	0.00990099	0.0693069	0.405941	0	0.019802	0.0430108	0.354839	0.193548	0.0322581	0.0537634	0.322581	0	0	['ex', 'inh', 'opc', 'oli']	['ex', 'inh', 'opc', 'oli']
7698	MANBAL	novel_in_catalog	0	0.333333	0.333333	0	0	0.333333	0	0	0.0638298	0.0638298	0.234043	0	0	0.617021	0.0212766	0	['ex', 'inh', 'oli']	['ast', 'ex', 'inh', 'oli']
7704	USP16	incomplete-splice_match	0	0	0	0.0606061	0.030303	0.909091	0	0	0.184615	0	0.0307692	0.0153846	0.0769231	0.692308	0	0	['mic', 'oli']	['ast', 'opc', 'oli']
7705	USP16	incomplete-splice_match	0	0	0	0	0	1	0	0	0	0.0769231	0.128205	0	0.0512821	0.74359	0	0	['oli']	['ex', 'inh', 'opc', 'oli']
7706	USP16	incomplete-splice_match	0.0769231	0.0769231	0	0.230769	0	0.615385	0	0	0.173913	0	0	0.130435	0.0434783	0.652174	0	0	['ast', 'ex', 'mic', 'oli']	['ast', 'mic', 'oli']
7708	USP16	incomplete-splice_match	0	0	0	0	0	1	0	0	0	0.266667	0.266667	0	0.0666667	0.4	0	0	['oli']	['ex', 'inh', 'opc', 'oli']
7725	LTN1	incomplete-splice_match	0.0714286	0.214286	0.0714286	0	0	0.642857	0	0	0	0.416667	0.0833333	0.0833333	0	0.416667	0	0	['ast', 'ex', 'inh', 'oli']	['ex', 'inh', 'mic', 'oli']
7737	LTN1	incomplete-splice_match	0	0.117647	0.0588235	0	0.0588235	0.764706	0	0	0.0909091	0.030303	0.0606061	0	0	0.818182	0	0	['ex', 'inh', 'opc', 'oli']	['ast', 'inh', 'oli']
7747	LTN1	incomplete-splice_match	0.166667	0.166667	0	0	0	0.666667	0	0	0.272727	0.0909091	0	0	0	0.636364	0	0	['ast', 'ex', 'oli']	['ast', 'ex', 'oli']
7749	RPL23P2	full-splice_match	0	0	0.333333	0.111111	0.111111	0.444444	0	0	0.444444	0.444444	0	0.111111	0	0	0	0	['inh', 'mic', 'opc', 'oli']	['ast', 'ex', 'mic']
7753	RWDD2B	incomplete-splice_match	0	0	0.25	0	0	0.75	0	0	0	0.416667	0.166667	0	0.25	0.166667	0	0	['inh', 'oli']	['ex', 'inh', 'opc', 'oli']
7755	RWDD2B	incomplete-splice_match	0	1	0	0	0	0	0	0	0.142857	0.857143	0	0	0	0	0	0	['ex']	['ast', 'ex']
7757	ENSG00000291531	full-splice_match	0.181818	0.181818	0	0.181818	0.0909091	0.363636	0	0	0.3	0.4	0	0	0	0.3	0	0	['ast', 'ex', 'mic', 'opc', 'oli']	['ast', 'ex', 'oli']
7760	CCT8	full-splice_match	0.0240964	0.590361	0.138554	0.0481928	0.0180723	0.168675	0.0060241	0.0060241	0.04	0.312	0.144	0.096	0.064	0.344	0	0	['ex', 'inh', 'oli']	['ex', 'inh', 'mic', 'opc', 'oli']
7762	CCT8	incomplete-splice_match	0.125	0.15625	0.0625	0.03125	0	0.625	0	0	0.0357143	0.214286	0.142857	0.0357143	0.0357143	0.535714	0	0	['ast', 'ex', 'inh', 'oli']	['ex', 'inh', 'oli']
7763	CCT8	incomplete-splice_match	0	0.222222	0.222222	0	0	0.555556	0	0	0	0.1	0.1	0.1	0.1	0.6	0	0	['ex', 'inh', 'oli']	['ex', 'inh', 'mic', 'opc', 'oli']
7767	CCT8	incomplete-splice_match	0	0	0.142857	0	0.142857	0.571429	0	0.142857	0.0909091	0.181818	0.363636	0.0909091	0	0.272727	0	0	['end', 'inh', 'opc', 'oli']	['ast', 'ex', 'inh', 'mic', 'oli']
7768	CCT8	incomplete-splice_match	0.2	0.6	0.2	0	0	0	0	0	0.111111	0.333333	0.111111	0.111111	0.111111	0.222222	0	0	['ast', 'ex', 'inh']	['ast', 'ex', 'inh', 'mic', 'opc', 'oli']
7769	CCT8	incomplete-splice_match	0	0	0.666667	0	0	0.333333	0	0	0	0.6	0.2	0	0	0.2	0	0	['inh', 'oli']	['ex', 'inh', 'oli']
7770	CCT8	incomplete-splice_match	0.0952381	0.190476	0.047619	0.047619	0.047619	0.52381	0	0.047619	0.111111	0.5	0.111111	0.0555556	0	0.222222	0	0	['ast', 'ex', 'oli']	['ast', 'ex', 'inh', 'mic', 'oli']
7774	PCP4	full-splice_match	0.0149254	0.679104	0.179104	0.0223881	0	0.104478	0	0	0.0217391	0.717391	0.149457	0.013587	0.013587	0.0842391	0	0	['ex', 'inh', 'oli']	['ex', 'inh', 'oli']
7781	DSCAM	incomplete-splice_match	0	0.666667	0	0	0.333333	0	0	0	0	0.5	0	0	0.5	0	0	0	['ex', 'opc']	['ex', 'opc']
7790	ENSG00000291770	full-splice_match	0.0555556	0.472222	0.25	0.0277778	0.0277778	0.166667	0	0	0.111111	0.296296	0.296296	0.0740741	0.111111	0.111111	0	0	['ast', 'ex', 'inh', 'oli']	['ast', 'ex', 'inh', 'mic', 'opc', 'oli']
7791	TCEAL2	incomplete-splice_match	0	0.555556	0.111111	0.111111	0.111111	0.111111	0	0	0.0833333	0.416667	0.25	0	0	0.25	0	0	['ex', 'inh', 'mic', 'opc', 'oli']	['ast', 'ex', 'inh', 'oli']
7794	TCEAL2	full-splice_match	0.0403101	0.590698	0.204651	0.00775194	0.0248062	0.125581	0.00155039	0.00465116	0.0319865	0.516835	0.259259	0.010101	0.037037	0.143098	0.0016835	0	['ex', 'inh', 'oli']	['ex', 'inh', 'oli']
7800	ENSG00000291825	full-splice_match	0	0.666667	0	0	0	0.333333	0	0	0	1	0	0	0	0	0	0	['ex', 'oli']	['ex']
7804	TCEAL6	full-splice_match	0.0224719	0.719101	0.185393	0.011236	0.0280899	0.0280899	0	0.00561798	0.0195122	0.570732	0.307317	0.0097561	0.0390244	0.0536585	0	0	['ex', 'inh']	['ex', 'inh', 'oli']
7808	TCEAL6	incomplete-splice_match	0	0.714286	0.142857	0	0	0.142857	0	0	0	0.6	0.4	0	0	0	0	0	['ex', 'inh', 'oli']	['ex', 'inh']
7812	BEX5	full-splice_match	0.0218341	0.707424	0.161572	0.00873362	0.0174672	0.0829694	0	0	0.0206897	0.603448	0.234483	0.0103448	0.0482759	0.0827586	0	0	['ex', 'inh', 'oli']	['ex', 'inh', 'oli']
7813	BEX5	incomplete-splice_match	0.012987	0.720779	0.123377	0.0194805	0.012987	0.103896	0	0.00649351	0.0213904	0.609626	0.208556	0.00534759	0.0481283	0.101604	0	0.00534759	['ex', 'inh', 'oli']	['ex', 'inh', 'oli']
7827	NKRF	full-splice_match	0.111111	0.5	0.333333	0.0555556	0	0	0	0	0	0.5	0.25	0	0	0.25	0	0	['ast', 'ex', 'inh', 'mic']	['ex', 'inh', 'oli']
7830	CETN2	full-splice_match	0.060241	0.421687	0.168675	0	0.0240964	0.325301	0	0	0.0181818	0.436364	0.145455	0	0.0181818	0.381818	0	0	['ast', 'ex', 'inh', 'oli']	['ex', 'inh', 'oli']
7834	CETN2	incomplete-splice_match	0	0.702128	0.0851064	0	0.0212766	0.191489	0	0	0.122807	0.280702	0.157895	0	0.0526316	0.385965	0	0	['ex', 'inh', 'oli']	['ast', 'ex', 'inh', 'opc', 'oli']
7837	NSDHL	full-splice_match	0	0	0.0357143	0.0714286	0.0357143	0.821429	0	0.0357143	0.0357143	0.0357143	0.0714286	0	0.107143	0.75	0	0	['mic', 'oli']	['inh', 'opc', 'oli']
7850	PQBP1	full-splice_match	0.0263158	0.289474	0.144737	0.0131579	0.0263158	0.5	0	0	0.0105263	0.4	0.221053	0.0210526	0.0105263	0.315789	0	0.0210526	['ex', 'inh', 'oli']	['ex', 'inh', 'oli']
7854	PQBP1	full-splice_match	0	0.697368	0.0921053	0	0.0131579	0.197368	0	0	0.0357143	0.392857	0.178571	0.0178571	0.0178571	0.303571	0.0178571	0.0357143	['ex', 'inh', 'oli']	['ex', 'inh', 'oli']
7856	ENSG00000292216	full-splice_match	0.111111	0	0	0.111111	0.111111	0.666667	0	0	0	0.25	0.25	0	0	0.5	0	0	['ast', 'mic', 'opc', 'oli']	['ex', 'inh', 'oli']
7857	GRIPAP1	full-splice_match	0	0.6	0	0.1	0	0.3	0	0	0	0.333333	0.166667	0	0	0.5	0	0	['ex', 'mic', 'oli']	['ex', 'inh', 'oli']
7867	SLC35A2	full-splice_match	0	0	0	0	0	1	0	0	0	0.0285714	0	0	0	0.971429	0	0	['oli']	['oli']
7871	OTUD5	incomplete-splice_match	0.122302	0.0935252	0.107914	0.057554	0.028777	0.589928	0	0	0.04	0.106667	0.226667	0.0666667	0.08	0.466667	0	0.0133333	['ast', 'ex', 'inh', 'mic', 'oli']	['ex', 'inh', 'mic', 'opc', 'oli']
7873	OTUD5	incomplete-splice_match	0.142857	0.285714	0.285714	0	0	0.285714	0	0	0.333333	0.333333	0	0	0	0.333333	0	0	['ast', 'ex', 'inh', 'oli']	['ast', 'ex', 'oli']
7874	TIMM17B	full-splice_match	0.00724638	0.318841	0.123188	0.0289855	0.0362319	0.478261	0	0.00724638	0.028777	0.122302	0.136691	0.028777	0.0431655	0.640288	0	0	['ex', 'inh', 'oli']	['ex', 'inh', 'oli']
7875	TIMM17B	full-splice_match	0	0	0	0	0	1	0	0	0	0.0625	0	0.0625	0	0.875	0	0	['oli']	['ex', 'mic', 'oli']
7884	GRIPAP1	incomplete-splice_match	0.2	0.5	0.1	0	0	0.2	0	0	0	0.625	0.125	0	0	0.25	0	0	['ast', 'ex', 'inh', 'oli']	['ex', 'inh', 'oli']
7887	CCDC120	full-splice_match	0.0454545	0.484848	0.393939	0.0151515	0.0454545	0.0151515	0	0	0.06	0.5	0.38	0	0.02	0.04	0	0	['ex', 'inh']	['ast', 'ex', 'inh']
7888	PRAF2	full-splice_match	0.0852459	0.42623	0.154098	0.00327869	0.0262295	0.304918	0	0	0.102041	0.22449	0.102041	0.0102041	0.0357143	0.520408	0	0.00510204	['ast', 'ex', 'inh', 'oli']	['ast', 'ex', 'inh', 'oli']
7891	WDR45	full-splice_match	0.155172	0.362069	0.155172	0.0172414	0.0862069	0.206897	0	0.0172414	0.173913	0.391304	0.0869565	0	0.0434783	0.304348	0	0	['ast', 'ex', 'inh', 'opc', 'oli']	['ast', 'ex', 'inh', 'oli']
7897	WDR45	full-splice_match	0	0.833333	0.166667	0	0	0	0	0	0.0363636	0.327273	0.218182	0.0181818	0.0545455	0.345455	0	0	['ex', 'inh']	['ex', 'inh', 'opc', 'oli']
7904	ENSG00000292220	full-splice_match	0.105263	0.210526	0	0.0526316	0	0.631579	0	0	0.1	0.2	0.1	0.1	0	0.5	0	0	['ast', 'ex', 'mic', 'oli']	['ast', 'ex', 'inh', 'mic', 'oli']
7906	GPKOW	full-splice_match	0.153846	0	0.0769231	0.0769231	0.0769231	0.615385	0	0	0.0344828	0.0689655	0.0689655	0.0344828	0.103448	0.655172	0.0344828	0	['ast', 'inh', 'mic', 'opc', 'oli']	['ex', 'inh', 'opc', 'oli']
7915	TRMT1L	full-splice_match	0.21875	0.15625	0.21875	0.03125	0.03125	0.34375	0	0	0.0487805	0.243902	0.121951	0.0487805	0	0.536585	0	0	['ast', 'ex', 'inh', 'oli']	['ex', 'inh', 'oli']
7917	TRMT1L	incomplete-splice_match	0.0909091	0.242424	0.121212	0	0	0.545455	0	0	0.1	0.1	0	0	0.1	0.7	0	0	['ast', 'ex', 'inh', 'oli']	['ast', 'ex', 'opc', 'oli']
7923	TRMT1L	incomplete-splice_match	0	0.25	0	0	0.25	0.5	0	0	0	0.111111	0.222222	0	0	0.666667	0	0	['ex', 'opc', 'oli']	['ex', 'inh', 'oli']
7926	TRMT1L	incomplete-splice_match	0.111111	0.444444	0	0	0	0.444444	0	0	0.230769	0.0769231	0.0769231	0	0	0.615385	0	0	['ast', 'ex', 'oli']	['ast', 'ex', 'inh', 'oli']
7929	ENSG00000279838	full-splice_match	0.0714286	0.285714	0.0714286	0	0	0.571429	0	0	0	0.25	0.25	0	0	0.5	0	0	['ast', 'ex', 'inh', 'oli']	['ex', 'inh', 'oli']
7930	IVNS1ABP	incomplete-splice_match	0.03	0.01	0.07	0.06	0.03	0.8	0	0	0.0232558	0.0813953	0.104651	0.0232558	0.0465116	0.72093	0	0	['inh', 'mic', 'oli']	['ex', 'inh', 'oli']
7931	IVNS1ABP	incomplete-splice_match	0	0	0.108108	0	0	0.891892	0	0	0.027027	0.121622	0.162162	0.0540541	0.027027	0.608108	0	0	['inh', 'oli']	['ex', 'inh', 'mic', 'oli']
7933	IVNS1ABP	full-splice_match	0.0283912	0.044164	0.0347003	0.0378549	0.00946372	0.832808	0	0.0126183	0.0612245	0.244898	0.0408163	0.0612245	0.0204082	0.571429	0	0	['oli']	['ast', 'ex', 'mic', 'oli']
7942	IVNS1ABP	incomplete-splice_match	0	0	0	0	0	1	0	0	0	0	0	0.142857	0	0.857143	0	0	['oli']	['mic', 'oli']
7944	IVNS1ABP	incomplete-splice_match	0	0	0	0	0.222222	0.777778	0	0	0	0.0909091	0.0909091	0	0	0.818182	0	0	['opc', 'oli']	['ex', 'inh', 'oli']
7946	IVNS1ABP	incomplete-splice_match	0.034188	0.042735	0.034188	0.017094	0.00854701	0.863248	0	0	0.0447761	0.104478	0.0597015	0.0447761	0.0298507	0.701493	0	0.0149254	['oli']	['ex', 'inh', 'oli']
7948	IVNS1ABP	incomplete-splice_match	0.025641	0.0512821	0	0	0	0.923077	0	0	0.0333333	0.166667	0.0666667	0	0.0666667	0.666667	0	0	['ex', 'oli']	['ex', 'inh', 'opc', 'oli']
7970	TPR	incomplete-splice_match	0	0.333333	0	0	0.166667	0.5	0	0	0	0.2	0	0	0	0.8	0	0	['ex', 'opc', 'oli']	['ex', 'oli']
7973	TPR	incomplete-splice_match	0	0	0	0.166667	0	0.666667	0.166667	0	0.1875	0	0.125	0	0.0625	0.625	0	0	['mic', 'oli', 'per']	['ast', 'inh', 'opc', 'oli']
7975	TPR	incomplete-splice_match	0.1	0.1	0	0	0	0.8	0	0	0.111111	0.444444	0	0.111111	0	0.333333	0	0	['ast', 'ex', 'oli']	['ast', 'ex', 'mic', 'oli']
7977	TPR	incomplete-splice_match	0	0.2	0	0	0	0.8	0	0	0	0.3	0	0.1	0.1	0.5	0	0	['ex', 'oli']	['ex', 'mic', 'opc', 'oli']
7982	NMNAT2	novel_not_in_catalog	0.105263	0.631579	0.210526	0	0.0526316	0	0	0	0	0.571429	0.333333	0	0	0.0952381	0	0	['ast', 'ex', 'inh', 'opc']	['ex', 'inh', 'oli']
7991	ARPC5	full-splice_match	0.0384615	0.269231	0.0769231	0.115385	0	0.5	0	0	0.0833333	0.416667	0	0	0	0.5	0	0	['ex', 'inh', 'mic', 'oli']	['ast', 'ex', 'oli']
7993	NMNAT2	incomplete-splice_match	0	0.8	0.133333	0	0	0.0666667	0	0	0	0.277778	0.555556	0	0.0555556	0.111111	0	0	['ex', 'inh', 'oli']	['ex', 'inh', 'opc', 'oli']
7997	COLGALT2	novel_not_in_catalog	0	0	0	0	0	1	0	0	0.0357143	0	0	0	0	0.964286	0	0	['oli']	['oli']
8001	NMNAT2	incomplete-splice_match	0.166667	0.5	0.333333	0	0	0	0	0	0.2	0.6	0.2	0	0	0	0	0	['ast', 'ex', 'inh']	['ast', 'ex', 'inh']
8012	COLGALT2	incomplete-splice_match	0	0.2	0	0	0	0.8	0	0	0.0526316	0.105263	0.210526	0	0.0526316	0.578947	0	0	['ex', 'oli']	['ast', 'ex', 'inh', 'opc', 'oli']
8013	COLGALT2	novel_not_in_catalog	0.153846	0	0.153846	0	0.0769231	0.615385	0	0	0.142857	0.142857	0	0	0	0.714286	0	0	['ast', 'inh', 'opc', 'oli']	['ast', 'ex', 'oli']
8017	COLGALT2	incomplete-splice_match	0	0.277778	0.166667	0	0	0.555556	0	0	0	0.0769231	0.0384615	0	0.0384615	0.846154	0	0	['ex', 'inh', 'oli']	['ex', 'oli']
8018	COLGALT2	novel_not_in_catalog	0.04	0	0	0	0.04	0.92	0	0	0.0769231	0.0769231	0.0769231	0	0.153846	0.615385	0	0	['oli']	['ast', 'ex', 'inh', 'opc', 'oli']
8019	COLGALT2	novel_not_in_catalog	0	0.25	0	0	0.0833333	0.666667	0	0	0	0.4	0	0	0	0.6	0	0	['ex', 'opc', 'oli']	['ex', 'oli']
8020	COLGALT2	incomplete-splice_match	0.206897	0.172414	0	0	0.0344828	0.586207	0	0	0	0.147059	0.117647	0	0.0588235	0.676471	0	0	['ast', 'ex', 'oli']	['ex', 'inh', 'opc', 'oli']
8026	C1orf21-DT	full-splice_match	0.333333	0.222222	0.222222	0	0	0.222222	0	0	0.3	0.3	0.3	0	0	0.1	0	0	['ast', 'ex', 'inh', 'oli']	['ast', 'ex', 'inh', 'oli']
8039	EDEM3	incomplete-splice_match	0.0526316	0.210526	0.0526316	0.0526316	0.105263	0.526316	0	0	0	0.25	0.25	0	0	0.5	0	0	['ast', 'ex', 'inh', 'mic', 'opc', 'oli']	['ex', 'inh', 'oli']
8046	EDEM3	incomplete-splice_match	0	0.0555556	0.0555556	0.0555556	0	0.833333	0	0	0.0714286	0.285714	0.142857	0	0	0.5	0	0	['ex', 'inh', 'mic', 'oli']	['ast', 'ex', 'inh', 'oli']
8055	HP1BP3	incomplete-splice_match	0	0	0	0	0	1	0	0	0	0	0.133333	0.0666667	0	0.8	0	0	['oli']	['inh', 'mic', 'oli']
8056	HP1BP3	incomplete-splice_match	0.125	0.25	0.1875	0	0	0.4375	0	0	0	0.125	0.208333	0.0416667	0	0.625	0	0	['ast', 'ex', 'inh', 'oli']	['ex', 'inh', 'oli']
8059	HP1BP3	incomplete-splice_match	0	0.357143	0.0714286	0	0.0714286	0.5	0	0	0	0.310345	0.275862	0	0.0344828	0.37931	0	0	['ex', 'inh', 'opc', 'oli']	['ex', 'inh', 'oli']
8064	HP1BP3	incomplete-splice_match	0	0.142857	0.285714	0	0	0.428571	0.142857	0	0.111111	0.444444	0.222222	0	0	0.222222	0	0	['ex', 'inh', 'oli', 'per']	['ast', 'ex', 'inh', 'oli']
8065	HP1BP3	incomplete-splice_match	0	0.666667	0	0	0	0.333333	0	0	0	0.5	0	0.5	0	0	0	0	['ex', 'oli']	['ex', 'mic']
8068	HP1BP3	incomplete-splice_match	0.0892857	0.142857	0.046875	0.0223214	0.0513393	0.645089	0.00223214	0	0.0698254	0.21197	0.134663	0.0199501	0.0723192	0.491272	0	0	['ast', 'ex', 'opc', 'oli']	['ast', 'ex', 'inh', 'opc', 'oli']
8069	HP1BP3	novel_in_catalog	0.0843373	0.108434	0.0722892	0.0481928	0.0481928	0.638554	0	0	0.131579	0.105263	0.0526316	0.0263158	0.0526316	0.631579	0	0	['ast', 'ex', 'inh', 'oli']	['ast', 'ex', 'inh', 'opc', 'oli']
8070	HP1BP3	incomplete-splice_match	0	0.3	0.2	0.1	0	0.4	0	0	0.0666667	0.133333	0.266667	0.0666667	0	0.466667	0	0	['ex', 'inh', 'mic', 'oli']	['ast', 'ex', 'inh', 'mic', 'oli']
8073	HP1BP3	incomplete-splice_match	0.164021	0.275132	0.026455	0.0529101	0.026455	0.444444	0.00529101	0.00529101	0.131868	0.362637	0.032967	0.0989011	0.021978	0.32967	0.010989	0.010989	['ast', 'ex', 'mic', 'oli']	['ast', 'ex', 'mic', 'oli']
8075	HP1BP3	incomplete-splice_match	0.0792079	0.148515	0.00990099	0.0792079	0.049505	0.623762	0.00990099	0	0.215686	0.117647	0.0196078	0.0980392	0	0.54902	0	0	['ast', 'ex', 'mic', 'oli']	['ast', 'ex', 'mic', 'oli']
8076	HP1BP3	incomplete-splice_match	0.032967	0.043956	0	0.010989	0.021978	0.868132	0	0.021978	0.0571429	0.342857	0.0857143	0.0571429	0.0285714	0.428571	0	0	['oli']	['ast', 'ex', 'inh', 'mic', 'oli']
8077	HP1BP3	novel_in_catalog	0	0.0769231	0.0384615	0	0.153846	0.730769	0	0	0.0238095	0.0952381	0	0	0.119048	0.761905	0	0	['ex', 'opc', 'oli']	['ex', 'opc', 'oli']
8082	HP1BP3	incomplete-splice_match	0	0	0.25	0	0	0.75	0	0	0	0.363636	0.181818	0	0.0909091	0.363636	0	0	['inh', 'oli']	['ex', 'inh', 'opc', 'oli']
8083	UBR4	incomplete-splice_match	0.166667	0.5	0.166667	0	0	0.166667	0	0	0	0.8	0	0	0	0.2	0	0	['ast', 'ex', 'inh', 'oli']	['ex', 'oli']
8084	HP1BP3	incomplete-splice_match	0	0.625	0	0.125	0.125	0.125	0	0	0	0.5	0	0.333333	0	0.166667	0	0	['ex', 'mic', 'opc', 'oli']	['ex', 'mic', 'oli']
8085	HP1BP3	incomplete-splice_match	0	1	0	0	0	0	0	0	0.1	0.5	0.1	0	0.2	0.1	0	0	['ex']	['ast', 'ex', 'inh', 'opc', 'oli']
8088	EIF4G3	incomplete-splice_match	0.0352941	0.152941	0.105882	0.0470588	0	0.658824	0	0	0.05	0.24	0.22	0.03	0.03	0.42	0.01	0	['ex', 'inh', 'oli']	['ast', 'ex', 'inh', 'oli']
8089	EIF4G3	incomplete-splice_match	0.102804	0.280374	0.28972	0.00934579	0.00934579	0.308411	0	0	0.0363636	0.509091	0.263636	0.00909091	0.0363636	0.145455	0	0	['ast', 'ex', 'inh', 'oli']	['ex', 'inh', 'oli']
8090	EIF4G3	incomplete-splice_match	0.047619	0.380952	0.0952381	0.0357143	0.0238095	0.416667	0	0	0.0229885	0.45977	0.16092	0.0114943	0.0344828	0.310345	0	0	['ex', 'inh', 'oli']	['ex', 'inh', 'oli']
8091	EIF4G3	incomplete-splice_match	0.045977	0.609195	0.252874	0.0114943	0.0114943	0.0689655	0	0	0.0465116	0.162791	0.209302	0.0697674	0	0.511628	0	0	['ex', 'inh', 'oli']	['ex', 'inh', 'mic', 'oli']
8093	EIF4G3	incomplete-splice_match	0.0178571	0.383929	0.133929	0	0.0535714	0.410714	0	0	0	0.453125	0.28125	0	0.015625	0.25	0	0	['ex', 'inh', 'opc', 'oli']	['ex', 'inh', 'oli']
8109	EIF4G3	incomplete-splice_match	0.3125	0.1875	0.0625	0	0.1875	0.25	0	0	0	0.2	0.2	0.2	0	0.4	0	0	['ast', 'ex', 'inh', 'opc', 'oli']	['ex', 'inh', 'mic', 'oli']
8110	EIF4G3	incomplete-splice_match	0	0	0.111111	0.111111	0.222222	0.555556	0	0	0	0.5	0	0	0	0.5	0	0	['inh', 'mic', 'opc', 'oli']	['ex', 'oli']
8116	UBR4	incomplete-splice_match	0	0.5	0.25	0	0	0.25	0	0	0.5	0.5	0	0	0	0	0	0	['ex', 'inh', 'oli']	['ast', 'ex']
8134	RPS15AP6	full-splice_match	0	0.193548	0.0322581	0.0967742	0.129032	0.548387	0	0	0	0.157895	0.210526	0.105263	0.210526	0.315789	0	0	['ex', 'mic', 'opc', 'oli']	['ex', 'inh', 'mic', 'opc', 'oli']
8138	EIF4G3	incomplete-splice_match	0	0.363636	0.272727	0.0909091	0	0.272727	0	0	0	0.166667	0.5	0	0.166667	0.166667	0	0	['ex', 'inh', 'mic', 'oli']	['ex', 'inh', 'opc', 'oli']
8142	UBR4	incomplete-splice_match	0	0	0.5	0	0	0.5	0	0	0.285714	0.285714	0	0	0.142857	0.285714	0	0	['inh', 'oli']	['ast', 'ex', 'opc', 'oli']
8143	UBR4	incomplete-splice_match	0.15	0.3	0	0	0	0.55	0	0	0.117647	0.352941	0.294118	0	0	0.235294	0	0	['ast', 'ex', 'oli']	['ast', 'ex', 'inh', 'oli']
8145	UBR4	incomplete-splice_match	0.166667	0.166667	0.166667	0	0	0.5	0	0	0.5	0.25	0	0	0.25	0	0	0	['ast', 'ex', 'inh', 'oli']	['ast', 'ex', 'opc']
8146	EIF4G3	full-splice_match	0	0.222222	0.333333	0.111111	0.111111	0.222222	0	0	0	0.388889	0.166667	0.0555556	0.0555556	0.277778	0	0.0555556	['ex', 'inh', 'mic', 'opc', 'oli']	['ex', 'end', 'inh', 'mic', 'opc', 'oli']
8154	RAP1GAP	incomplete-splice_match	0.0769231	0.923077	0	0	0	0	0	0	0	0.833333	0	0	0.166667	0	0	0	['ast', 'ex']	['ex', 'opc']
8159	RAP1GAP	incomplete-splice_match	0	1	0	0	0	0	0	0	0	0.833333	0.166667	0	0	0	0	0	['ex']	['ex', 'inh']
8162	USP48	incomplete-splice_match	0.222222	0.111111	0.222222	0	0	0.444444	0	0	0	0.477612	0.268657	0.0149254	0.0149254	0.223881	0	0	['ast', 'ex', 'inh', 'oli']	['ex', 'inh', 'oli']
8169	USP48	full-splice_match	0	0.105263	0.0526316	0.0350877	0.0175439	0.789474	0	0	0.0173913	0.730435	0.173913	0	0.0173913	0.0608696	0	0	['ex', 'inh', 'oli']	['ex', 'inh', 'oli']
8170	USP48	incomplete-splice_match	0.111111	0.031746	0.031746	0	0.0634921	0.761905	0	0	0	0	0.142857	0	0	0.857143	0	0	['ast', 'opc', 'oli']	['inh', 'oli']
8186	USP48	incomplete-splice_match	0.142857	0	0	0	0	0.857143	0	0	0	0	0.25	0	0.25	0.5	0	0	['ast', 'oli']	['inh', 'opc', 'oli']
8188	EMC1	full-splice_match	0.1	0.1	0	0.1	0.1	0.6	0	0	0.117647	0.117647	0.117647	0.0784314	0.0980392	0.470588	0	0	['ast', 'ex', 'mic', 'opc', 'oli']	['ast', 'ex', 'inh', 'mic', 'opc', 'oli']
8189	USP48	incomplete-splice_match	0	0	0	0	0	1	0	0	0	0.142857	0	0	0	0.857143	0	0	['oli']	['ex', 'oli']
8192	EMC1	incomplete-splice_match	0.04	0	0	0.12	0	0.84	0	0	0	0	0	0	0	1	0	0	['mic', 'oli']	['oli']
8195	USP48	incomplete-splice_match	0	0.15	0.15	0	0.05	0.65	0	0	0.0645161	0.0967742	0.0322581	0	0	0.806452	0	0	['ex', 'inh', 'opc', 'oli']	['ast', 'ex', 'oli']
8197	USP48	incomplete-splice_match	0	0.375	0.125	0	0	0.5	0	0	0	0.181818	0.227273	0	0.0454545	0.545455	0	0	['ex', 'inh', 'oli']	['ex', 'inh', 'oli']
8198	EMC1	full-splice_match	0.134615	0.307692	0.115385	0.0384615	0.0384615	0.346154	0	0.0192308	0.0625	0.5	0.25	0	0	0.1875	0	0	['ast', 'ex', 'inh', 'oli']	['ast', 'ex', 'inh', 'oli']
8199	USP48	incomplete-splice_match	0.0483871	0.290323	0.112903	0	0.016129	0.532258	0	0	0.0178571	0.214286	0.0714286	0.0178571	0.0178571	0.642857	0	0.0178571	['ex', 'inh', 'oli']	['ex', 'inh', 'oli']
8201	USP48	full-splice_match	0.148148	0.148148	0.0740741	0.037037	0.037037	0.555556	0	0	0.0322581	0.150538	0.11828	0.0322581	0.0645161	0.602151	0	0	['ast', 'ex', 'inh', 'oli']	['ex', 'inh', 'opc', 'oli']
8212	EMC1	incomplete-splice_match	0.125	0.3125	0.125	0.0625	0.0625	0.3125	0	0	0	0.636364	0	0	0	0.363636	0	0	['ast', 'ex', 'inh', 'mic', 'opc', 'oli']	['ex', 'oli']
8214	LUZP1	incomplete-splice_match	0	0.666667	0.222222	0	0	0	0	0.111111	0.1	0.3	0.4	0.1	0.1	0	0	0	['ex', 'end', 'inh']	['ast', 'ex', 'inh', 'mic', 'opc']
8215	LUZP1	incomplete-splice_match	0.123288	0.506849	0.191781	0.0547945	0.0136986	0.109589	0	0	0.0540541	0.581081	0.337838	0	0	0.027027	0	0	['ast', 'ex', 'inh', 'mic', 'oli']	['ast', 'ex', 'inh']
8216	LUZP1	novel_in_catalog	0	1	0	0	0	0	0	0	0	0.2	0.8	0	0	0	0	0	['ex']	['ex', 'inh']
8218	LUZP1	full-splice_match	0	0.727273	0.227273	0.0454545	0	0	0	0	0.15	0.2	0.25	0.1	0.1	0.15	0.05	0	['ex', 'inh']	['ast', 'ex', 'inh', 'mic', 'opc', 'oli', 'per']
8224	ENSG00000289014	full-splice_match	0	0.666667	0.333333	0	0	0	0	0	0.2	0.6	0.1	0	0	0.1	0	0	['ex', 'inh']	['ast', 'ex', 'inh', 'oli']
8227	LINC01355	full-splice_match	0.0855263	0.236842	0.151316	0.0328947	0.0855263	0.401316	0	0.00657895	0.0948276	0.336207	0.163793	0.0603448	0.0431034	0.293103	0.00862069	0	['ast', 'ex', 'inh', 'opc', 'oli']	['ast', 'ex', 'inh', 'mic', 'oli']
8235	HNRNPR	novel_in_catalog	0	0.142857	0.142857	0	0	0.714286	0	0	0	0.285714	0	0	0	0.714286	0	0	['ex', 'inh', 'oli']	['ex', 'oli']
8237	HNRNPR	novel_in_catalog	0	0.111111	0	0	0.111111	0.777778	0	0	0	0	0	0	0.0909091	0.909091	0	0	['ex', 'opc', 'oli']	['opc', 'oli']
8240	HNRNPR	incomplete-splice_match	0.25	0.25	0	0	0	0.5	0	0	0.111111	0	0.222222	0	0	0.666667	0	0	['ast', 'ex', 'oli']	['ast', 'inh', 'oli']
8243	HNRNPR	incomplete-splice_match	0.04	0	0.04	0.08	0.08	0.76	0	0	0.0285714	0.142857	0.2	0.0285714	0.142857	0.457143	0	0	['mic', 'opc', 'oli']	['ex', 'inh', 'opc', 'oli']
8246	HNRNPR	incomplete-splice_match	0.125	0.0625	0.0625	0.125	0.0625	0.5625	0	0	0.03125	0.1875	0.03125	0.09375	0.03125	0.625	0	0	['ast', 'ex', 'inh', 'mic', 'opc', 'oli']	['ex', 'mic', 'oli']
8247	HNRNPR	full-splice_match	0	0.333333	0	0.333333	0	0.333333	0	0	0	0.333333	0.222222	0.111111	0	0.333333	0	0	['ex', 'mic', 'oli']	['ex', 'inh', 'mic', 'oli']
8252	ID3	full-splice_match	0.528	0.024	0.008	0.008	0.016	0.248	0.008	0.16	0.653333	0.0266667	0	0.0133333	0	0.293333	0	0.0133333	['ast', 'end', 'oli']	['ast', 'oli']
8257	ELOA-AS1	full-splice_match	0.315789	0.210526	0.0526316	0	0.105263	0.315789	0	0	0	0.0714286	0.0714286	0	0	0.857143	0	0	['ast', 'ex', 'inh', 'opc', 'oli']	['ex', 'inh', 'oli']
8265	ENSG00000289835	full-splice_match	0	1	0	0	0	0	0	0	0	0.875	0.125	0	0	0	0	0	['ex']	['ex', 'inh']
8271	AKR7A2	full-splice_match	0.0816327	0.147959	0.0663265	0.0459184	0.0459184	0.607143	0	0.00510204	0.0705128	0.166667	0.108974	0.0192308	0.0384615	0.589744	0	0.00641026	['ast', 'ex', 'inh', 'oli']	['ast', 'ex', 'inh', 'oli']
8272	GALE	full-splice_match	0.285714	0.190476	0.190476	0.238095	0.047619	0.047619	0	0	0.157895	0.526316	0.157895	0.0526316	0	0.105263	0	0	['ast', 'ex', 'inh', 'mic']	['ast', 'ex', 'inh', 'mic', 'oli']
8273	GALE	incomplete-splice_match	0	0.5	0	0	0.5	0	0	0	0	0.6	0.2	0	0.2	0	0	0	['ex', 'opc']	['ex', 'inh', 'opc']
8275	HMGCL	full-splice_match	0.0714286	0.52381	0.190476	0.047619	0	0.142857	0	0.0238095	0.0909091	0.236364	0.121212	0.0484848	0.0242424	0.472727	0	0.00606061	['ast', 'ex', 'inh', 'oli']	['ast', 'ex', 'inh', 'oli']
8287	HMGCL	incomplete-splice_match	0.0526316	0.105263	0	0.0526316	0	0.789474	0	0	0.037037	0.0740741	0.148148	0.0740741	0.0740741	0.592593	0	0	['ast', 'ex', 'mic', 'oli']	['ex', 'inh', 'mic', 'opc', 'oli']
8289	FUCA1	full-splice_match	0.1	0	0	0.3	0	0.6	0	0	0.0909091	0.25	0.0909091	0.159091	0.0454545	0.363636	0	0	['ast', 'mic', 'oli']	['ast', 'ex', 'inh', 'mic', 'oli']
8297	SRSF10	full-splice_match	0.2	0.4	0.2	0	0	0.2	0	0	0	0.571429	0	0	0	0.428571	0	0	['ast', 'ex', 'inh', 'oli']	['ex', 'oli']
8298	SRSF10	novel_in_catalog	0	0	0	0	0	1	0	0	0	0.3	0.1	0.1	0.1	0.4	0	0	['oli']	['ex', 'inh', 'mic', 'opc', 'oli']
8300	SRSF10	incomplete-splice_match	0.178082	0.246575	0.0958904	0.0547945	0.0684932	0.356164	0	0	0.0666667	0.416667	0.166667	0.0666667	0.05	0.233333	0	0	['ast', 'ex', 'inh', 'mic', 'opc', 'oli']	['ast', 'ex', 'inh', 'mic', 'opc', 'oli']
8301	SRSF10	full-splice_match	0.121951	0.213415	0.0853659	0.0365854	0.0792683	0.45122	0	0.0121951	0.115226	0.300412	0.102881	0.0452675	0.0411523	0.395062	0	0	['ast', 'ex', 'inh', 'opc', 'oli']	['ast', 'ex', 'inh', 'oli']
8302	CAPZB	full-splice_match	0.077135	0.14876	0.115702	0.0606061	0.0385675	0.548209	0.00550964	0.00550964	0.0757946	0.156479	0.139364	0.129584	0.0464548	0.442543	0.00244499	0.00733496	['ast', 'ex', 'inh', 'mic', 'oli']	['ast', 'ex', 'inh', 'mic', 'oli']
8307	STPG1	incomplete-splice_match	0.125	0.375	0	0	0	0.5	0	0	0	0.8	0	0.2	0	0	0	0	['ast', 'ex', 'oli']	['ex', 'mic']
8309	STPG1	incomplete-splice_match	0.138889	0.361111	0	0	0.0277778	0.472222	0	0	0.0465116	0.255814	0.0697674	0	0.0465116	0.581395	0	0	['ast', 'ex', 'oli']	['ex', 'inh', 'oli']
8312	STPG1	novel_in_catalog	0	0.3	0	0.1	0.1	0.5	0	0	0	0	0.333333	0	0	0.666667	0	0	['ex', 'mic', 'opc', 'oli']	['inh', 'oli']
8314	CAPZB	full-splice_match	0.0619048	0.00952381	0.0190476	0.0761905	0.0857143	0.742857	0.0047619	0	0.0842105	0	0.0105263	0.0631579	0.0315789	0.789474	0	0.0210526	['ast', 'mic', 'opc', 'oli']	['ast', 'mic', 'oli']
8323	CAPZB	incomplete-splice_match	0.148148	0.0899471	0.328042	0.0529101	0.047619	0.328042	0	0.00529101	0	0	0	0	0.142857	0.857143	0	0	['ast', 'ex', 'inh', 'mic', 'oli']	['opc', 'oli']
8328	SYF2	full-splice_match	0.0216802	0.352304	0.100271	0.0135501	0.0216802	0.476965	0	0.0135501	0.0829876	0.286307	0.161826	0.0165975	0.0414938	0.406639	0.00414938	0	['ex', 'inh', 'oli']	['ast', 'ex', 'inh', 'oli']
8331	SYF2	incomplete-splice_match	0.0909091	0	0.181818	0	0	0.727273	0	0	0	0.0769231	0.0769231	0.0769231	0.153846	0.615385	0	0	['ast', 'inh', 'oli']	['ex', 'inh', 'mic', 'opc', 'oli']
8333	SYF2	incomplete-splice_match	0	0.285714	0	0.142857	0	0.571429	0	0	0.0833333	0.0833333	0.166667	0	0.0833333	0.583333	0	0	['ex', 'mic', 'oli']	['ast', 'ex', 'inh', 'opc', 'oli']
8335	SYF2	incomplete-splice_match	0.0390625	0.273438	0.121094	0.0078125	0.0195312	0.527344	0	0.0117188	0.0586207	0.248276	0.110345	0.0172414	0.0344828	0.531034	0	0	['ex', 'inh', 'oli']	['ast', 'ex', 'inh', 'oli']
8336	CAPZB	incomplete-splice_match	0	1	0	0	0	0	0	0	0	0.5	0.5	0	0	0	0	0	['ex']	['ex', 'inh']
8337	SYF2	full-splice_match	0.125	0.25	0.125	0	0.125	0.375	0	0	0	0.666667	0	0	0	0.333333	0	0	['ast', 'ex', 'inh', 'opc', 'oli']	['ex', 'oli']
8338	SYF2	full-splice_match	0	0.5	0.25	0	0	0.25	0	0	0.125	0	0	0	0	0.875	0	0	['ex', 'inh', 'oli']	['ast', 'oli']
8339	RSRP1	full-splice_match	0.0731415	0.338129	0.0983213	0.029976	0.0215827	0.430456	0	0.00839329	0.138728	0.22158	0.0828516	0.0231214	0.0154143	0.512524	0.00578035	0	['ast', 'ex', 'inh', 'oli']	['ast', 'ex', 'inh', 'oli']
8346	RSRP1	incomplete-splice_match	0.200913	0.0852359	0.0563166	0.065449	0.0350076	0.552511	0	0.00456621	0.0523627	0.577267	0.152618	0.0197957	0.0191571	0.178161	0	0.00063857	['ast', 'ex', 'inh', 'mic', 'oli']	['ast', 'ex', 'inh', 'oli']
8348	RSRP1	incomplete-splice_match	0.126168	0.602804	0.186916	0.0140187	0.00934579	0.0560748	0	0.0046729	0	0	1	0	0	0	0	0	['ast', 'ex', 'inh', 'oli']	['inh']
8351	RSRP1	incomplete-splice_match	0.173913	0.217391	0	0.0434783	0.0434783	0.521739	0	0	0.0740741	0.259259	0.037037	0.0740741	0	0.555556	0	0	['ast', 'ex', 'oli']	['ast', 'ex', 'mic', 'oli']
8352	RSRP1	full-splice_match	0.13278	0.139004	0.026971	0.0539419	0.026971	0.618257	0.00207469	0	0.0866667	0.184444	0.0755556	0.0577778	0.0288889	0.564444	0.00222222	0	['ast', 'ex', 'mic', 'oli']	['ast', 'ex', 'inh', 'mic', 'oli']
8354	RSRP1	novel_in_catalog	0	0	0	0	0	1	0	0	0.0909091	0.181818	0.0909091	0	0	0.636364	0	0	['oli']	['ast', 'ex', 'inh', 'oli']
8357	RSRP1	incomplete-splice_match	0.176471	0.313725	0.0392157	0	0.0392157	0.411765	0	0.0196078	0.0877193	0.263158	0.0701754	0	0.0350877	0.54386	0	0	['ast', 'ex', 'oli']	['ast', 'ex', 'inh', 'oli']
8370	CAPZB	incomplete-splice_match	0.111111	0.555556	0	0	0	0.333333	0	0	0	0.185185	0.222222	0.037037	0.037037	0.518519	0	0	['ast', 'ex', 'oli']	['ex', 'inh', 'oli']
8373	ENSG00000272084	full-splice_match	0.047619	0.428571	0.142857	0.047619	0.0238095	0.309524	0	0	0.114754	0.52459	0.245902	0.00819672	0.0245902	0.0819672	0	0	['ex', 'inh', 'oli']	['ast', 'ex', 'inh', 'oli']
8377	ENSG00000228172	full-splice_match	0.125	0	0.25	0	0	0.625	0	0	0.0666667	0.333333	0.2	0	0	0.4	0	0	['ast', 'inh', 'oli']	['ast', 'ex', 'inh', 'oli']
8381	STMN1	full-splice_match	0.0111044	0.320008	0.0654149	0.00565314	0.011912	0.584696	0.000403796	0.000807591	0.0143777	0.335837	0.110944	0.00708155	0.0171674	0.51309	0.000429185	0.00107296	['ex', 'inh', 'oli']	['ex', 'inh', 'oli']
8382	STMN1	incomplete-splice_match	0	0.290323	0.0645161	0	0.0645161	0.580645	0	0	0.0232558	0.395349	0.116279	0	0.0232558	0.44186	0	0	['ex', 'inh', 'opc', 'oli']	['ex', 'inh', 'oli']
8383	STMN1	incomplete-splice_match	0.0445344	0.11336	0.174089	0.0121457	0.0242915	0.631579	0	0	0.0171527	0.0308748	0.0445969	0.0120069	0.0205832	0.871355	0.00171527	0.00171527	['ex', 'inh', 'oli']	['oli']
8385	STMN1	incomplete-splice_match	0.0145631	0.328883	0.0449029	0.00485437	0.00728155	0.599515	0	0	0.0102136	0.231198	0.095636	0.00464253	0.0185701	0.63974	0	0	['ex', 'oli']	['ex', 'inh', 'oli']
8390	STMN1	incomplete-splice_match	0.1	0	0	0	0	0.9	0	0	0	0.2	0	0	0	0.8	0	0	['ast', 'oli']	['ex', 'oli']
8414	STMN1	incomplete-splice_match	0.021028	0.240654	0.0420561	0.00934579	0.021028	0.665888	0	0	0.00823045	0.261317	0.0946502	0.0164609	0.0164609	0.602881	0	0	['ex', 'oli']	['ex', 'inh', 'oli']
8418	STMN1	incomplete-splice_match	0	0.333333	0	0	0	0.666667	0	0	0	0.25	0.1875	0	0	0.5625	0	0	['ex', 'oli']	['ex', 'inh', 'oli']
8434	CAPZB	incomplete-splice_match	0	0.8	0.2	0	0	0	0	0	0.0769231	0.0769231	0.0769231	0.461538	0.153846	0.153846	0	0	['ex', 'inh']	['ast', 'ex', 'inh', 'mic', 'opc', 'oli']
8443	GPN2	full-splice_match	0.04	0.08	0.16	0.12	0.04	0.52	0.04	0	0	0.1	0.1	0.1	0	0.7	0	0	['ex', 'inh', 'mic', 'oli']	['ex', 'inh', 'mic', 'oli']
8444	ENSG00000289554	full-splice_match	0.428571	0	0.142857	0	0	0.428571	0	0	0	0.428571	0.142857	0	0.285714	0.142857	0	0	['ast', 'inh', 'oli']	['ex', 'inh', 'opc', 'oli']
8445	GPATCH3	full-splice_match	0.166667	0.119048	0.0952381	0.047619	0.047619	0.52381	0	0	0.0526316	0.157895	0	0.105263	0.105263	0.578947	0	0	['ast', 'ex', 'inh', 'oli']	['ast', 'ex', 'mic', 'opc', 'oli']
8447	UBR4	incomplete-splice_match	0.208238	0.350114	0.148741	0.0160183	0.0228833	0.251716	0	0.00228833	0	0.753846	0.215385	0	0	0.0307692	0	0	['ast', 'ex', 'inh', 'oli']	['ex', 'inh']
8448	CAPZB	incomplete-splice_match	0.16	0.24	0.08	0.16	0.08	0.28	0	0	0.0434783	0.326087	0.130435	0.195652	0.0652174	0.217391	0.0217391	0	['ast', 'ex', 'inh', 'mic', 'opc', 'oli']	['ex', 'inh', 'mic', 'opc', 'oli']
8454	MAP3K6	incomplete-splice_match	0.666667	0.333333	0	0	0	0	0	0	0	0.5	0.25	0.25	0	0	0	0	['ast', 'ex']	['ex', 'inh', 'mic']
8459	WASF2	incomplete-splice_match	0.24	0.12	0	0.08	0	0.52	0	0.04	0.0606061	0.0606061	0	0	0	0.848485	0	0.030303	['ast', 'ex', 'mic', 'oli']	['ast', 'ex', 'oli']
8460	WASF2	incomplete-splice_match	0.0779221	0.021645	0.004329	0.04329	0.021645	0.800866	0	0.030303	0.084507	0.0316901	0.0140845	0.0457746	0.028169	0.792254	0.00352113	0	['ast', 'oli']	['ast', 'oli']
8462	WASF2	incomplete-splice_match	0.0952381	0.047619	0	0.142857	0.142857	0.571429	0	0	0.133333	0.0666667	0.0666667	0.0666667	0.0666667	0.6	0	0	['ast', 'mic', 'opc', 'oli']	['ast', 'ex', 'inh', 'mic', 'opc', 'oli']
8464	WASF2	incomplete-splice_match	0	0.125	0	0.375	0.125	0.375	0	0	0.08	0.24	0	0.12	0.04	0.48	0	0.04	['ex', 'mic', 'opc', 'oli']	['ast', 'ex', 'mic', 'oli']
8465	AHDC1	incomplete-splice_match	0.154639	0.494845	0.179676	0.0103093	0.0368189	0.11782	0.00147275	0.00441826	0.0597738	0.579968	0.252019	0.0145396	0.0242326	0.0694669	0	0	['ast', 'ex', 'inh', 'oli']	['ast', 'ex', 'inh', 'oli']
8469	IFI6	full-splice_match	0.0338462	0.516923	0.224615	0.0153846	0.0292308	0.167692	0	0.0123077	0.0500808	0.292407	0.276252	0.0355412	0.108239	0.22294	0.00323102	0.0113086	['ex', 'inh', 'oli']	['ast', 'ex', 'inh', 'opc', 'oli']
8472	IFI6	full-splice_match	0.0454545	0.0227273	0.0909091	0	0.522727	0.295455	0	0.0227273	0	0.05	0.35	0.1	0.2	0.3	0	0	['inh', 'opc', 'oli']	['ex', 'inh', 'mic', 'opc', 'oli']
8476	ENSG00000287244	full-splice_match	0.333333	0.333333	0	0	0	0.333333	0	0	0	0.5	0.5	0	0	0	0	0	['ast', 'ex', 'oli']	['ex', 'inh']
8478	RPA2	full-splice_match	0.0655738	0.31694	0.0819672	0.0245902	0.0300546	0.478142	0	0.00273224	0.0375427	0.337884	0.16041	0.0341297	0.0409556	0.37884	0	0.0102389	['ast', 'ex', 'inh', 'oli']	['ex', 'inh', 'oli']
8483	RPA2	incomplete-splice_match	0	0.5	0.166667	0.166667	0	0.166667	0	0	0.181818	0.0909091	0.181818	0	0.0909091	0.454545	0	0	['ex', 'inh', 'mic', 'oli']	['ast', 'ex', 'inh', 'opc', 'oli']
8485	RPA2	incomplete-splice_match	0.125	0.4	0.1	0.05	0.025	0.275	0	0.025	0.0833333	0.305556	0.194444	0.0277778	0	0.388889	0	0	['ast', 'ex', 'inh', 'mic', 'oli']	['ast', 'ex', 'inh', 'oli']
8490	RN7SL559P	full-splice_match	0.0555556	0.333333	0.166667	0.166667	0.0555556	0.222222	0	0	0	0.545455	0.0909091	0.0909091	0	0.272727	0	0	['ast', 'ex', 'inh', 'mic', 'opc', 'oli']	['ex', 'inh', 'mic', 'oli']
8491	EYA3	incomplete-splice_match	0.333333	0	0.333333	0.333333	0	0	0	0	0	0.25	0.125	0.25	0	0.375	0	0	['ast', 'inh', 'mic']	['ex', 'inh', 'mic', 'oli']
8494	EYA3	incomplete-splice_match	0.103448	0.37931	0.0948276	0.0344828	0.0172414	0.362069	0	0.00862069	0.0994475	0.287293	0.154696	0.038674	0.0165746	0.403315	0	0	['ast', 'ex', 'inh', 'oli']	['ast', 'ex', 'inh', 'oli']
8495	EYA3	novel_not_in_catalog	0.0666667	0.466667	0.0666667	0.0666667	0	0.333333	0	0	0.115385	0.538462	0.153846	0.0384615	0	0.153846	0	0	['ast', 'ex', 'inh', 'mic', 'oli']	['ast', 'ex', 'inh', 'oli']
8497	SPCS2P4	full-splice_match	0.0434783	0.217391	0.0869565	0.0434783	0	0.608696	0	0	0.05	0	0.2	0.15	0.05	0.55	0	0	['ex', 'inh', 'oli']	['ast', 'inh', 'mic', 'opc', 'oli']
8503	DNAJC8	full-splice_match	0.0479452	0.452055	0.136986	0.0123288	0.0191781	0.327397	0	0.00410959	0.0262391	0.400875	0.169096	0.0233236	0.0204082	0.358601	0	0.00145773	['ex', 'inh', 'oli']	['ex', 'inh', 'oli']
8511	DNAJC8	incomplete-splice_match	0	0.25	0	0	0	0.75	0	0	0.125	0.125	0	0	0.125	0.625	0	0	['ex', 'oli']	['ast', 'ex', 'opc', 'oli']
8512	DNAJC8	incomplete-splice_match	0.0689655	0.298851	0.0804598	0.0229885	0.0229885	0.505747	0	0	0.0252101	0.134454	0.151261	0.0588235	0.0756303	0.554622	0	0	['ast', 'ex', 'inh', 'oli']	['ex', 'inh', 'mic', 'opc', 'oli']
8517	DNAJC8	incomplete-splice_match	0.0188679	0.188679	0.0754717	0.0754717	0.0188679	0.622642	0	0	0	0.15625	0.078125	0.03125	0.046875	0.6875	0	0	['ex', 'inh', 'mic', 'oli']	['ex', 'inh', 'oli']
8520	DNAJC8	incomplete-splice_match	0.1	0.0666667	0.0666667	0	0.0333333	0.733333	0	0	0.0526316	0.178947	0.136842	0.0105263	0	0.610526	0.0105263	0	['ast', 'ex', 'inh', 'oli']	['ast', 'ex', 'inh', 'oli']
8523	ENSG00000270605	full-splice_match	0.047619	0.333333	0.190476	0	0.0952381	0.333333	0	0	0.133333	0.0666667	0.6	0	0.0666667	0.133333	0	0	['ex', 'inh', 'opc', 'oli']	['ast', 'ex', 'inh', 'opc', 'oli']
8529	SNHG12	full-splice_match	0.0769231	0.153846	0.0769231	0	0.0384615	0.653846	0	0	0.0333333	0.233333	0.0666667	0	0.1	0.566667	0	0	['ast', 'ex', 'inh', 'oli']	['ex', 'inh', 'opc', 'oli']
8530	SNHG12	full-splice_match	0.272727	0.236364	0.0909091	0.0909091	0.0181818	0.290909	0	0	0.195652	0.304348	0.282609	0.0217391	0.0434783	0.152174	0	0	['ast', 'ex', 'inh', 'mic', 'oli']	['ast', 'ex', 'inh', 'oli']
8531	SNHG12	full-splice_match	0	0.2	0	0.1	0	0.7	0	0	0	0.571429	0.142857	0.142857	0	0.142857	0	0	['ex', 'mic', 'oli']	['ex', 'inh', 'mic', 'oli']
8532	SNHG12	incomplete-splice_match	0.25	0.375	0.25	0.125	0	0	0	0	0.0909091	0.272727	0.272727	0.0909091	0	0.181818	0	0.0909091	['ast', 'ex', 'inh', 'mic']	['ast', 'ex', 'end', 'inh', 'mic', 'oli']
8537	SNHG12	incomplete-splice_match	0	0.1	0.1	0	0.1	0.7	0	0	0	0	0	0.5	0	0.5	0	0	['ex', 'inh', 'opc', 'oli']	['mic', 'oli']
8539	SNHG12	full-splice_match	0.333333	0	0	0.333333	0	0.333333	0	0	0	0.25	0.125	0.25	0	0.375	0	0	['ast', 'mic', 'oli']	['ex', 'inh', 'mic', 'oli']
8541	TAF12	full-splice_match	0.037037	0.166667	0.0740741	0.0308642	0.0617284	0.62963	0	0	0.0495868	0.198347	0.181818	0.00826446	0.0165289	0.53719	0.00826446	0	['ex', 'inh', 'opc', 'oli']	['ex', 'inh', 'oli']
8546	TAF12	incomplete-splice_match	0.1875	0.0625	0	0.0625	0.0625	0.625	0	0	0.25	0.166667	0.0833333	0	0	0.5	0	0	['ast', 'ex', 'mic', 'opc', 'oli']	['ast', 'ex', 'inh', 'oli']
8549	ENSG00000289291	full-splice_match	0	0	0	0	0	1	0	0	0.266667	0.0666667	0.0666667	0.0666667	0	0.533333	0	0	['oli']	['ast', 'ex', 'inh', 'mic', 'oli']
8551	SRSF4	incomplete-splice_match	0.1	0.633333	0.166667	0	0	0.1	0	0	0.181818	0.0909091	0.0681818	0.0227273	0.0681818	0.568182	0	0	['ast', 'ex', 'inh', 'oli']	['ast', 'ex', 'inh', 'opc', 'oli']
8552	SRSF4	incomplete-splice_match	0.180952	0.047619	0.209524	0.0857143	0.0380952	0.428571	0	0.00952381	0.0612245	0.357143	0.306122	0.0612245	0.0306122	0.183673	0	0	['ast', 'inh', 'mic', 'oli']	['ast', 'ex', 'inh', 'mic', 'oli']
8554	SRSF4	full-splice_match	0.0380952	0.0666667	0.0380952	0.0666667	0.0857143	0.704762	0	0	0.1	0.1	0	0	0	0.7	0	0.1	['ex', 'mic', 'opc', 'oli']	['ast', 'ex', 'end', 'oli']
8555	SRSF4	incomplete-splice_match	0	0.210526	0.105263	0	0.0526316	0.526316	0	0.105263	0.0909091	0.0909091	0.272727	0	0.0454545	0.5	0	0	['ex', 'end', 'inh', 'opc', 'oli']	['ast', 'ex', 'inh', 'oli']
8559	SRSF4	incomplete-splice_match	0	0.428571	0.428571	0	0	0.142857	0	0	0	0.0833333	0.333333	0	0.0833333	0.5	0	0	['ex', 'inh', 'oli']	['ex', 'inh', 'opc', 'oli']
8562	MECR	full-splice_match	0.21875	0.34375	0.1875	0	0.0625	0.1875	0	0	0	0.1	0.0666667	0.0666667	0.0666667	0.7	0	0	['ast', 'ex', 'inh', 'opc', 'oli']	['ex', 'inh', 'mic', 'opc', 'oli']
8567	MECR	full-splice_match	0.25	0	0	0	0.25	0.5	0	0	0.06	0.48	0.2	0	0.06	0.2	0	0	['ast', 'opc', 'oli']	['ast', 'ex', 'inh', 'opc', 'oli']
8573	PLA2G2C	full-splice_match	0.0952381	0.571429	0.238095	0	0.047619	0.047619	0	0	0.166667	0.5	0.111111	0.0555556	0	0.166667	0	0	['ast', 'ex', 'inh']	['ast', 'ex', 'inh', 'mic', 'oli']
8584	CAMK2N1	full-splice_match	0.0508475	0.161017	0.0847458	0.00847458	0.00423729	0.690678	0	0	0.0042735	0.705128	0.15812	0.0042735	0.0042735	0.123932	0	0	['ast', 'ex', 'inh', 'oli']	['ex', 'inh', 'oli']
8589	CAMK2N1	full-splice_match	0.0384388	0.219397	0.0804258	0.00709639	0.00827912	0.64518	0.00118273	0	0.0185923	0.565737	0.158035	0.00332005	0.00996016	0.243692	0	0.000664011	['ex', 'inh', 'oli']	['ex', 'inh', 'oli']
8604	DDOST	full-splice_match	0.083871	0.16129	0.0870968	0.0548387	0.103226	0.506452	0.00322581	0	0.0612245	0.344023	0.169096	0.0466472	0.0466472	0.326531	0.00291545	0.00291545	['ast', 'ex', 'inh', 'mic', 'opc', 'oli']	['ast', 'ex', 'inh', 'oli']
8613	DDOST	full-splice_match	0.166667	0.5	0.0833333	0	0	0.25	0	0	0	0.333333	0.166667	0.333333	0.0833333	0.0833333	0	0	['ast', 'ex', 'inh', 'oli']	['ex', 'inh', 'mic', 'opc', 'oli']
8620	KIF17	incomplete-splice_match	0	1	0	0	0	0	0	0	0	0.8	0.2	0	0	0	0	0	['ex']	['ex', 'inh']
8626	HP1BP3	novel_in_catalog	0.133531	0.557864	0.181009	0	0.0118694	0.109792	0.00296736	0.00296736	0	0	0.125	0	0	0.875	0	0	['ast', 'ex', 'inh', 'oli']	['inh', 'oli']
8627	HP1BP3	incomplete-splice_match	0.230769	0.0192308	0.0288462	0.0288462	0.0673077	0.625	0	0	0	0.25	0	0.25	0	0.5	0	0	['ast', 'opc', 'oli']	['ex', 'mic', 'oli']
8641	BRINP3-DT	novel_not_in_catalog	0.555556	0.111111	0	0	0.333333	0	0	0	0.166667	0.833333	0	0	0	0	0	0	['ast', 'ex', 'opc']	['ast', 'ex']
8646	BRINP3-DT	novel_not_in_catalog	0.166667	0.666667	0	0	0.0833333	0.0833333	0	0	0.2	0	0	0	0.6	0.2	0	0	['ast', 'ex', 'opc', 'oli']	['ast', 'opc', 'oli']
8647	BRINP3-DT	full-splice_match	0.111111	0.444444	0.111111	0	0.222222	0.111111	0	0	0.444444	0.444444	0	0	0.111111	0	0	0	['ast', 'ex', 'inh', 'opc', 'oli']	['ast', 'ex', 'opc']
8648	BRINP3-DT	full-splice_match	0.153846	0.307692	0.230769	0	0.230769	0	0	0.0769231	0.272727	0.363636	0	0	0.363636	0	0	0	['ast', 'ex', 'end', 'inh', 'opc']	['ast', 'ex', 'opc']
8649	TMEM69	full-splice_match	0.0169492	0.474576	0.127119	0.0338983	0.0338983	0.279661	0.00847458	0.0254237	0.0263158	0.342105	0.138158	0.0263158	0.0328947	0.434211	0	0	['ex', 'inh', 'oli']	['ex', 'inh', 'oli']
8650	TMEM69	full-splice_match	0.215686	0.254902	0.176471	0	0.0784314	0.254902	0	0.0196078	0	0.28125	0.3125	0	0.0625	0.34375	0	0	['ast', 'ex', 'inh', 'opc', 'oli']	['ex', 'inh', 'opc', 'oli']
8662	LURAP1	full-splice_match	0.025641	0.153846	0.025641	0	0.025641	0.769231	0	0	0	0.211538	0	0	0	0.769231	0.0192308	0	['ex', 'oli']	['ex', 'oli']
8665	UQCRH	full-splice_match	0.0428492	0.533111	0.16138	0.0144686	0.0250417	0.218698	0	0.00445186	0.0302882	0.437225	0.218368	0.0185638	0.0229604	0.269663	0.00097704	0.00195408	['ex', 'inh', 'oli']	['ex', 'inh', 'oli']
8666	UQCRH	full-splice_match	0.0708661	0.338583	0.181102	0.0393701	0.0551181	0.291339	0	0.023622	0.0273973	0.260274	0.280822	0.0136986	0.0342466	0.383562	0	0	['ast', 'ex', 'inh', 'opc', 'oli']	['ex', 'inh', 'oli']
8667	UQCRH	novel_in_catalog	0.0344828	0.448276	0.224138	0.0172414	0.0517241	0.224138	0	0	0.05	0.4	0.275	0.05	0.025	0.2	0	0	['ex', 'inh', 'opc', 'oli']	['ast', 'ex', 'inh', 'mic', 'oli']
8669	UQCRH	full-splice_match	0.114286	0.257143	0.114286	0.0285714	0.0285714	0.457143	0	0	0.0857143	0.342857	0.142857	0.0285714	0.0857143	0.285714	0	0.0285714	['ast', 'ex', 'inh', 'oli']	['ast', 'ex', 'inh', 'opc', 'oli']
8670	UQCRH	full-splice_match	0	0.666667	0	0	0	0.333333	0	0	0	0	1	0	0	0	0	0	['ex', 'oli']	['inh']
8672	UQCRH	incomplete-splice_match	0.1875	0.5625	0.125	0	0	0.125	0	0	0.125	0.5	0.25	0	0	0.125	0	0	['ast', 'ex', 'inh', 'oli']	['ast', 'ex', 'inh', 'oli']
8675	UQCRH	novel_in_catalog	0	0.363636	0.272727	0	0.0909091	0.272727	0	0	0	0.4	0.333333	0	0	0.266667	0	0	['ex', 'inh', 'opc', 'oli']	['ex', 'inh', 'oli']
8679	UQCRH	incomplete-splice_match									0	0.4	0.4	0	0	0.2	0	0	[]	['ex', 'inh', 'oli']
8680	UQCRH	full-splice_match	0.285714	0.142857	0.142857	0.142857	0	0.285714	0	0	0	0.5	0	0	0	0.5	0	0	['ast', 'ex', 'inh', 'mic', 'oli']	['ex', 'oli']
8688	RBBP4	full-splice_match	0.0704698	0.305369	0.14094	0.0167785	0.0469799	0.412752	0.0033557	0.0033557	0.0771704	0.215434	0.154341	0.0257235	0.0610932	0.466238	0	0	['ast', 'ex', 'inh', 'oli']	['ast', 'ex', 'inh', 'opc', 'oli']
8691	FAAH	full-splice_match	0.0186916	0	0.00934579	0.00934579	0.00934579	0.953271	0	0	0.0326087	0.273292	0.0900621	0	0.015528	0.585404	0.0015528	0.0015528	['oli']	['ex', 'inh', 'oli']
8697	FAAH	novel_in_catalog	0	0	0	0	0	1	0	0	0	0	0	0	0	1	0	0	['oli']	['oli']
8699	RBBP4	full-splice_match	0.111111	0.212121	0.030303	0.040404	0.040404	0.555556	0	0.010101	0.0410959	0.164384	0.157534	0.0205479	0.10274	0.506849	0	0.00684932	['ast', 'ex', 'oli']	['ex', 'inh', 'opc', 'oli']
8702	RBBP4	full-splice_match	0	0	0	0	0	1	0	0	0	0.09375	0.0625	0.015625	0.09375	0.734375	0	0	['oli']	['ex', 'inh', 'opc', 'oli']
8708	FAAH	incomplete-splice_match	0	0.5	0	0.125	0	0.375	0	0	0	0.111111	0.111111	0	0.111111	0.666667	0	0	['ex', 'mic', 'oli']	['ex', 'inh', 'opc', 'oli']
8710	RBBP4	full-splice_match	0.0851064	0.276596	0.12766	0.0638298	0.0425532	0.404255	0	0	0.084507	0.197183	0.126761	0.0422535	0.056338	0.492958	0	0	['ast', 'ex', 'inh', 'mic', 'oli']	['ast', 'ex', 'inh', 'opc', 'oli']
8715	CYP4X1	incomplete-splice_match									0	0.761905	0.238095	0	0	0	0	0	[]	['ex', 'inh']
8716	CYP4X1	incomplete-splice_match	0	0.444444	0.555556	0	0	0	0	0	0.0909091	0.636364	0.272727	0	0	0	0	0	['ex', 'inh']	['ast', 'ex', 'inh']
8721	CYP4X1	incomplete-splice_match									0	0.717391	0.282609	0	0	0	0	0	[]	['ex', 'inh']
8722	CYP4X1	incomplete-splice_match	0	0.4	0.6	0	0	0	0	0	0	0.3	0.7	0	0	0	0	0	['ex', 'inh']	['ex', 'inh']
8723	CYP4X1	incomplete-splice_match	0.0125	0.7625	0.2	0	0	0.0125	0.0125	0	0	1	0	0	0	0	0	0	['ex', 'inh']	['ex']
8728	CMPK1	full-splice_match	0.0291971	0.240876	0.131387	0.0583942	0.0218978	0.50365	0	0.0145985	0.0518519	0.288889	0.185185	0.0148148	0.0444444	0.414815	0	0	['ex', 'inh', 'mic', 'oli']	['ast', 'ex', 'inh', 'oli']
8730	CMPK1	incomplete-splice_match	0	0.3	0.1	0	0	0.6	0	0	0.0625	0.125	0.1875	0	0	0.625	0	0	['ex', 'inh', 'oli']	['ast', 'ex', 'inh', 'oli']
8731	CMPK1	incomplete-splice_match	0.0833333	0.166667	0	0	0	0.75	0	0	0.0769231	0.0769231	0.153846	0	0	0.692308	0	0	['ast', 'ex', 'oli']	['ast', 'ex', 'inh', 'oli']
8732	CMPK1	incomplete-splice_match	0.0769231	0.423077	0.115385	0.0384615	0.0769231	0.230769	0	0.0384615	0.125	0.35	0.175	0.025	0.025	0.25	0	0.05	['ast', 'ex', 'inh', 'opc', 'oli']	['ast', 'ex', 'end', 'inh', 'oli']
8733	CMPK1	full-splice_match	0	0.0714286	0.285714	0	0	0.642857	0	0	0	0.176471	0.235294	0.0588235	0	0.529412	0	0	['ex', 'inh', 'oli']	['ex', 'inh', 'mic', 'oli']
8746	ELAVL4	incomplete-splice_match	0	1	0	0	0	0	0	0	0	0.8	0.2	0	0	0	0	0	['ex']	['ex', 'inh']
8751	ELAVL4	incomplete-splice_match	0	0.2	0.6	0.1	0	0.1	0	0	0	0.692308	0.230769	0.0769231	0	0	0	0	['ex', 'inh', 'mic', 'oli']	['ex', 'inh', 'mic']
8752	ELAVL4	full-splice_match	0	0.2	0.2	0	0.4	0.2	0	0	0	0.266667	0.533333	0	0.0666667	0.133333	0	0	['ex', 'inh', 'opc', 'oli']	['ex', 'inh', 'opc', 'oli']
8753	ELAVL4	incomplete-splice_match	0	1	0	0	0	0	0	0	0	0	0.5	0	0	0.5	0	0	['ex']	['inh', 'oli']
8755	ELAVL4	incomplete-splice_match	0	0.4	0.4	0	0.2	0	0	0	0	0.714286	0.142857	0	0.142857	0	0	0	['ex', 'inh', 'opc']	['ex', 'inh', 'opc']
8756	ELAVL4	full-splice_match	0	0.4	0.6	0	0	0	0	0	0	0.62069	0.293103	0	0.0517241	0.0344828	0	0	['ex', 'inh']	['ex', 'inh', 'opc']
8757	ELAVL4	incomplete-splice_match	0	0.6	0.3	0	0.1	0	0	0	0	0.3	0.2	0.1	0.2	0.2	0	0	['ex', 'inh', 'opc']	['ex', 'inh', 'mic', 'opc', 'oli']
8762	ELAVL4	incomplete-splice_match	0	0.796875	0.125	0	0.0625	0	0	0.015625	0	0.8	0.2	0	0	0	0	0	['ex', 'inh', 'opc']	['ex', 'inh']
8763	ELAVL4	incomplete-splice_match	0.0212766	0.851064	0.0851064	0	0.0425532	0	0	0	0	0.727273	0.181818	0	0.030303	0.0606061	0	0	['ex', 'inh']	['ex', 'inh', 'oli']
8768	KIAA1522	incomplete-splice_match	0.0322581	0.741935	0.193548	0	0	0.0322581	0	0	0.0526316	0.684211	0.210526	0	0.0526316	0	0	0	['ex', 'inh']	['ast', 'ex', 'inh', 'opc']
8772	CDKN2C	full-splice_match	0.0641026	0.0641026	0	0	0.0897436	0.769231	0	0.0128205	0.238095	0.0952381	0.047619	0	0.047619	0.571429	0	0	['ast', 'ex', 'opc', 'oli']	['ast', 'ex', 'oli']
8773	CDKN2C	full-splice_match	0	0	0	0	0	0.977778	0	0.0222222	0.107143	0.0357143	0	0	0.178571	0.678571	0	0	['oli']	['ast', 'opc', 'oli']
8774	RNF11	incomplete-splice_match	0.111111	0.444444	0.222222	0	0	0.222222	0	0	0	0.428571	0.428571	0	0.142857	0	0	0	['ast', 'ex', 'inh', 'oli']	['ex', 'inh', 'opc']
8776	RNF11	full-splice_match	0.0518135	0.290155	0.227979	0.015544	0.0414508	0.373057	0	0	0.0628272	0.26178	0.157068	0.0104712	0.0209424	0.481675	0.0052356	0	['ast', 'ex', 'inh', 'oli']	['ast', 'ex', 'inh', 'oli']
8778	RNF11	full-splice_match	0.0121951	0.390244	0.353659	0	0.0121951	0.231707	0	0	0.0168067	0.554622	0.268908	0.00840336	0.0168067	0.134454	0	0	['ex', 'inh', 'oli']	['ex', 'inh', 'oli']
8783	S100PBP	incomplete-splice_match	0.25	0.25	0	0	0.25	0.25	0	0	0	0.333333	0	0	0	0.666667	0	0	['ast', 'ex', 'opc', 'oli']	['ex', 'oli']
8784	S100PBP	incomplete-splice_match	0.122807	0.140351	0.0701754	0.0175439	0.0526316	0.596491	0	0	0.138889	0.180556	0.111111	0.0138889	0.0277778	0.527778	0	0	['ast', 'ex', 'inh', 'opc', 'oli']	['ast', 'ex', 'inh', 'oli']
8786	OSBPL9	incomplete-splice_match	0.0952381	0.119048	0.119048	0.047619	0	0.619048	0	0	0.0263158	0	0.157895	0.105263	0.0526316	0.657895	0	0	['ast', 'ex', 'inh', 'oli']	['inh', 'mic', 'opc', 'oli']
8787	OSBPL9	incomplete-splice_match	0	0.0487805	0.170732	0	0.0243902	0.756098	0	0	0.0178571	0.0535714	0.142857	0.0714286	0.0178571	0.696429	0	0	['inh', 'oli']	['ex', 'inh', 'mic', 'oli']
8788	OSBPL9	incomplete-splice_match	0	0.0555556	0	0	0.0555556	0.888889	0	0	0.0740741	0.148148	0.0740741	0.037037	0	0.666667	0	0	['ex', 'opc', 'oli']	['ast', 'ex', 'inh', 'oli']
8789	OSBPL9	incomplete-splice_match	0	0.421053	0.157895	0	0	0.421053	0	0	0.0263158	0.0789474	0.0526316	0.0263158	0.0263158	0.789474	0	0	['ex', 'inh', 'oli']	['ex', 'inh', 'oli']
8790	OSBPL9	incomplete-splice_match	0.0714286	0.0238095	0.0238095	0	0.119048	0.761905	0	0	0.108108	0.135135	0.027027	0.027027	0.0810811	0.621622	0	0	['ast', 'opc', 'oli']	['ast', 'ex', 'opc', 'oli']
8791	OSBPL9	incomplete-splice_match	0.146341	0.0731707	0.0243902	0.0487805	0.0487805	0.658537	0	0	0.045977	0.045977	0.0804598	0.0114943	0.0689655	0.747126	0	0	['ast', 'ex', 'oli']	['inh', 'opc', 'oli']
8795	OSBPL9	incomplete-splice_match	0.0967742	0	0	0	0.0322581	0.870968	0	0	0.0869565	0.0869565	0.0869565	0	0.0434783	0.695652	0	0	['ast', 'oli']	['ast', 'ex', 'inh', 'oli']
8797	OSBPL9	incomplete-splice_match	0	0.0740741	0	0.037037	0	0.888889	0	0	0	0	0.190476	0.047619	0	0.761905	0	0	['ex', 'oli']	['inh', 'oli']
8798	OSBPL9	incomplete-splice_match	0.030303	0	0.030303	0.0606061	0.0909091	0.787879	0	0	0.0454545	0.0909091	0.0454545	0	0.181818	0.636364	0	0	['mic', 'opc', 'oli']	['ex', 'opc', 'oli']
8799	OSBPL9	incomplete-splice_match	0	0.272727	0.0909091	0	0	0.636364	0	0	0.0769231	0	0	0	0	0.923077	0	0	['ex', 'inh', 'oli']	['ast', 'oli']
8821	S100PBP	incomplete-splice_match	0.24	0	0.04	0	0.08	0.56	0.04	0.04	0.129032	0.16129	0.0322581	0.0645161	0.0645161	0.548387	0	0	['ast', 'opc', 'oli']	['ast', 'ex', 'mic', 'opc', 'oli']
8830	ENSG00000272175	full-splice_match	0.25	0	0	0	0.25	0.5	0	0	0	0.333333	0.333333	0	0	0.333333	0	0	['ast', 'opc', 'oli']	['ex', 'inh', 'oli']
8833	BTF3L4	full-splice_match	0.0201613	0.298387	0.137097	0.0241935	0.0362903	0.475806	0	0.00806452	0.0142349	0.284698	0.145907	0.0391459	0.0747331	0.441281	0	0	['ex', 'inh', 'oli']	['ex', 'inh', 'opc', 'oli']
8834	BTF3L4	full-splice_match	0.0543933	0.225941	0.0627615	0.0209205	0.0292887	0.606695	0	0	0.0273973	0.267123	0.116438	0.0205479	0.0410959	0.527397	0	0	['ast', 'ex', 'inh', 'oli']	['ex', 'inh', 'oli']
8835	BTF3L4	incomplete-splice_match	0.0333333	0.166667	0.1	0.1	0.0666667	0.533333	0	0	0.153846	0.307692	0.153846	0.0384615	0.0384615	0.307692	0	0	['ex', 'inh', 'mic', 'opc', 'oli']	['ast', 'ex', 'inh', 'oli']
8836	BTF3L4	incomplete-splice_match	0.166667	0.333333	0.166667	0	0.166667	0.166667	0	0	0	0.388889	0.111111	0	0	0.5	0	0	['ast', 'ex', 'inh', 'opc', 'oli']	['ex', 'inh', 'oli']
8837	BTF3L4	novel_in_catalog	0	0.567568	0.135135	0.0540541	0.027027	0.216216	0	0	0	0.08	0	0.08	0.04	0.76	0.04	0	['ex', 'inh', 'mic', 'oli']	['ex', 'mic', 'oli']
8838	BTF3L4	full-splice_match	0.025	0.125	0.025	0.05	0.075	0.7	0	0	0.0238095	0.166667	0.154762	0.0714286	0.0595238	0.52381	0	0	['ex', 'mic', 'opc', 'oli']	['ex', 'inh', 'mic', 'opc', 'oli']
8839	BTF3L4	incomplete-splice_match	0.0454545	0.318182	0.0909091	0.181818	0.0909091	0.272727	0	0	0.0434783	0.26087	0.173913	0.0434783	0.130435	0.347826	0	0	['ex', 'inh', 'mic', 'opc', 'oli']	['ex', 'inh', 'opc', 'oli']
8840	BTF3L4	incomplete-splice_match	0	0.3	0	0.1	0	0.6	0	0	0	0.266667	0.0666667	0.133333	0	0.533333	0	0	['ex', 'mic', 'oli']	['ex', 'inh', 'mic', 'oli']
8841	BTF3L4	full-splice_match	0.1	0.3	0.1	0	0	0.5	0	0	0.2	0.2	0	0.2	0	0.3	0	0.1	['ast', 'ex', 'inh', 'oli']	['ast', 'ex', 'end', 'mic', 'oli']
8842	BTF3L4	full-splice_match	0	0.375	0.125	0	0.125	0.375	0	0	0	0.3	0.1	0.15	0.05	0.4	0	0	['ex', 'inh', 'opc', 'oli']	['ex', 'inh', 'mic', 'opc', 'oli']
8843	BTF3L4	incomplete-splice_match	0	0.3	0.1	0	0	0.6	0	0	0	0.3	0.2	0	0	0.5	0	0	['ex', 'inh', 'oli']	['ex', 'inh', 'oli']
8848	ZFYVE9	incomplete-splice_match	0.0181818	0.436364	0.127273	0	0.0181818	0.4	0	0	0	0.416667	0.25	0	0.138889	0.194444	0	0	['ex', 'inh', 'oli']	['ex', 'inh', 'opc', 'oli']
8849	ZFYVE9	incomplete-splice_match	0.166667	0.583333	0	0	0.0833333	0.166667	0	0	0.133333	0.466667	0.266667	0	0	0.133333	0	0	['ast', 'ex', 'opc', 'oli']	['ast', 'ex', 'inh', 'oli']
8864	ZFYVE9	incomplete-splice_match	0	0.571429	0.428571	0	0	0	0	0	0	0.571429	0.285714	0	0	0.142857	0	0	['ex', 'inh']	['ex', 'inh', 'oli']
8865	ENSG00000272100	full-splice_match	0.0909091	0.636364	0.272727	0	0	0	0	0	0	0.75	0.166667	0	0.0833333	0	0	0	['ast', 'ex', 'inh']	['ex', 'inh', 'opc']
8867	PRPF38A	incomplete-splice_match	0.157895	0.157895	0	0	0.0526316	0.631579	0	0	0.181818	0.272727	0.0454545	0.0454545	0.0909091	0.363636	0	0	['ast', 'ex', 'opc', 'oli']	['ast', 'ex', 'opc', 'oli']
8869	PRPF38A	full-splice_match	0.047619	0.380952	0.047619	0	0.0952381	0.428571	0	0	0.172414	0.413793	0.172414	0	0.0344828	0.206897	0	0	['ex', 'opc', 'oli']	['ast', 'ex', 'inh', 'oli']
8870	PRPF38A	full-splice_match	0.0454545	0	0.0454545	0	0	0.909091	0	0	0.0454545	0.227273	0.0454545	0.0909091	0.0454545	0.545455	0	0	['oli']	['ex', 'mic', 'oli']
8875	GPX7	full-splice_match	0.235294	0.411765	0.117647	0	0	0.235294	0	0	0.0625	0.09375	0.125	0.15625	0.15625	0.40625	0	0	['ast', 'ex', 'inh', 'oli']	['ast', 'ex', 'inh', 'mic', 'opc', 'oli']
8877	ZYG11B	incomplete-splice_match	0.0869565	0.434783	0.0434783	0.0434783	0.0869565	0.304348	0	0	0.0769231	0.307692	0.230769	0.0769231	0	0.307692	0	0	['ast', 'ex', 'opc', 'oli']	['ast', 'ex', 'inh', 'mic', 'oli']
8882	S100PBP	full-splice_match	0.15625	0.15625	0.125	0.03125	0.03125	0.5	0	0	0.133333	0.2	0.0666667	0.0666667	0.0222222	0.511111	0	0	['ast', 'ex', 'inh', 'oli']	['ast', 'ex', 'inh', 'mic', 'oli']
8883	SCP2	incomplete-splice_match	0.097561	0.243902	0.097561	0	0.0487805	0.487805	0	0.0243902	0.166667	0.222222	0.148148	0.0185185	0.0925926	0.351852	0	0	['ast', 'ex', 'inh', 'oli']	['ast', 'ex', 'inh', 'opc', 'oli']
8885	SCP2	incomplete-splice_match	0.333333	0.166667	0	0	0	0.5	0	0	0	0	0.181818	0.181818	0.181818	0.454545	0	0	['ast', 'ex', 'oli']	['inh', 'mic', 'opc', 'oli']
8897	SCP2	full-splice_match	0.101307	0.124183	0.0915033	0.0196078	0.0947712	0.558824	0	0.00980392	0.0375	0.26875	0.175	0.0375	0.0375	0.4375	0.00625	0	['ast', 'ex', 'inh', 'opc', 'oli']	['ex', 'inh', 'oli']
8899	SCP2	incomplete-splice_match									0.105263	0.210526	0.210526	0.0526316	0.105263	0.315789	0	0	[]	['ast', 'ex', 'inh', 'mic', 'opc', 'oli']
8901	SCP2	full-splice_match	0	0	0	0	0.142857	0.857143	0	0	0	0.9375	0	0	0	0.0625	0	0	['opc', 'oli']	['ex', 'oli']
8904	HPCA	full-splice_match	0.0213992	0.82963	0.117695	0.00576132	0.00576132	0.017284	0	0.00246914	0.0108696	0.804348	0.129348	0.00543478	0.00652174	0.0423913	0	0.00108696	['ex', 'inh']	['ex', 'inh']
8907	CPT2	full-splice_match	0.2	0.2	0.1	0	0	0.5	0	0	0.142857	0.142857	0	0.285714	0.428571	0	0	0	['ast', 'ex', 'inh', 'oli']	['ast', 'ex', 'mic', 'opc']
8908	CPT2	incomplete-splice_match	0.116279	0.0697674	0.0697674	0.0697674	0	0.674419	0	0	0.125	0	0.03125	0.0625	0.15625	0.59375	0	0.03125	['ast', 'ex', 'inh', 'mic', 'oli']	['ast', 'mic', 'opc', 'oli']
8910	HPCA	full-splice_match	0	1	0	0	0	0	0	0	0	0.897196	0.088785	0	0	0.0140187	0	0	['ex']	['ex', 'inh']
8914	HPCA	incomplete-splice_match	0	0.789474	0.0526316	0	0	0.157895	0	0	0	0.857143	0.142857	0	0	0	0	0	['ex', 'inh', 'oli']	['ex', 'inh']
8915	LRP8-DT	full-splice_match	0	1	0	0	0	0	0	0	0	0.666667	0.333333	0	0	0	0	0	['ex']	['ex', 'inh']
[truncated: 51,537 more rows]

## Sheet: Celltype_assigment
isoform_id	gene	category	ast_count	ex_count	inh_count	mic_count	opc_count	oli_count	per_count	end_count	total_cellCount	percentAst	percentEx	percentInh	percentMic	percentOPC	percentOli	percentPer	percentEnd	conf_celltypes5
4	MAFIP	novel_not_in_catalog	2	1	3	2	1	20	0	1	30	0.0666667	0.0333333	0.1	0.0666667	0.0333333	0.666667	0	0.0333333	['ast', 'inh', 'mic', 'oli']
6	ENSG00000277400	incomplete-splice_match	123	218	98	80	59	964	0	1	1543	0.0797148	0.141283	0.0635126	0.0518471	0.0382372	0.624757	0	0.000648088	['ast', 'ex', 'inh', 'mic', 'oli']
7	ENSG00000277400	novel_not_in_catalog	20	47	19	10	7	100	0	1	204	0.0980392	0.230392	0.0931373	0.0490196	0.0343137	0.490196	0	0.00490196	['ast', 'ex', 'inh', 'oli']
9	MAFIP	novel_not_in_catalog	3	15	0	1	3	32	0	0	54	0.0555556	0.277778	0	0.0185185	0.0555556	0.592593	0	0	['ast', 'ex', 'opc', 'oli']
23	ENSG00000276256	novel_not_in_catalog	18	2	2	1	6	7	0	0	36	0.5	0.0555556	0.0555556	0.0277778	0.166667	0.194444	0	0	['ast', 'ex', 'inh', 'opc', 'oli']
26	ENSG00000278384	full-splice_match	11	16	7	3	4	26	1	0	68	0.161765	0.235294	0.102941	0.0441176	0.0588235	0.382353	0.0147059	0	['ast', 'ex', 'inh', 'opc', 'oli']
39	ENSG00000273748	novel_not_in_catalog	4	8	6	8	3	48	0	0	77	0.0519481	0.103896	0.0779221	0.103896	0.038961	0.623377	0	0	['ast', 'ex', 'inh', 'mic', 'oli']
40	ENSG00000273748	novel_not_in_catalog	2	3	1	1	0	55	0	0	62	0.0322581	0.0483871	0.016129	0.016129	0	0.887097	0	0	['oli']
41	ENSG00000273748	novel_not_in_catalog	0	0	0	0	0	25	0	0	25	0	0	0	0	0	1	0	0	['oli']
43	ENSG00000273748	novel_not_in_catalog	14	11	3	6	4	73	0	0	111	0.126126	0.0990991	0.027027	0.0540541	0.036036	0.657658	0	0	['ast', 'ex', 'mic', 'oli']
44	ENSG00000273748	novel_not_in_catalog	8	16	7	1	5	48	0	0	85	0.0941176	0.188235	0.0823529	0.0117647	0.0588235	0.564706	0	0	['ast', 'ex', 'inh', 'opc', 'oli']
45	ENSG00000273748	novel_not_in_catalog	10	16	5	4	6	47	1	0	89	0.11236	0.179775	0.0561798	0.0449438	0.0674157	0.52809	0.011236	0	['ast', 'ex', 'inh', 'opc', 'oli']
92	SUMO2P1	full-splice_match	0	5	0	1	1	3	0	0	10	0	0.5	0	0.1	0.1	0.3	0	0	['ex', 'mic', 'opc', 'oli']
93	MOG	novel_not_in_catalog	0	0	0	0	0	48	0	0	48	0	0	0	0	0	1	0	0	['oli']
94	MOG	novel_not_in_catalog	0	0	1	0	0	60	0	0	61	0	0	0.0163934	0	0	0.983607	0	0	['oli']
95	MOG	full-splice_match	2	2	0	0	0	85	0	1	90	0.0222222	0.0222222	0	0	0	0.944444	0	0.0111111	['oli']
100	HLA-A	novel_not_in_catalog	2	1	1	2	10	11	0	1	28	0.0714286	0.0357143	0.0357143	0.0714286	0.357143	0.392857	0	0.0357143	['ast', 'mic', 'opc', 'oli']
102	POLR1HASP	full-splice_match	3	5	6	0	0	15	0	0	29	0.103448	0.172414	0.206897	0	0	0.517241	0	0	['ast', 'ex', 'inh', 'oli']
104	POLR1H	full-splice_match	0	3	1	0	4	2	0	1	11	0	0.272727	0.0909091	0	0.363636	0.181818	0	0.0909091	['ex', 'end', 'inh', 'opc', 'oli']
117	PPP1R11	full-splice_match	2	6	4	0	0	29	0	0	41	0.0487805	0.146341	0.097561	0	0	0.707317	0	0	['ex', 'inh', 'oli']
118	RPP21	full-splice_match	1	5	1	0	2	5	0	0	14	0.0714286	0.357143	0.0714286	0	0.142857	0.357143	0	0	['ast', 'ex', 'inh', 'opc', 'oli']
119	RPP21	full-splice_match	3	29	12	1	7	82	0	0	134	0.0223881	0.216418	0.0895522	0.00746269	0.0522388	0.61194	0	0	['ex', 'inh', 'opc', 'oli']
122	RPP21	full-splice_match	1	15	0	1	0	10	0	0	27	0.037037	0.555556	0	0.037037	0	0.37037	0	0	['ex', 'oli']
128	TUBB	full-splice_match	2	98	41	5	16	75	0	3	240	0.00833333	0.408333	0.170833	0.0208333	0.0666667	0.3125	0	0.0125	['ex', 'inh', 'opc', 'oli']
129	FLOT1	incomplete-splice_match	1	13	9	1	1	5	0	0	30	0.0333333	0.433333	0.3	0.0333333	0.0333333	0.166667	0	0	['ex', 'inh', 'oli']
130	DDX39B	incomplete-splice_match	17	72	33	12	15	63	0	2	214	0.0794393	0.336449	0.154206	0.0560748	0.0700935	0.294393	0	0.00934579	['ast', 'ex', 'inh', 'mic', 'opc', 'oli']
140	LSM2	full-splice_match	5	25	3	3	2	101	1	1	141	0.035461	0.177305	0.0212766	0.0212766	0.0141844	0.716312	0.0070922	0.0070922	['ex', 'oli']
145	HSPA1A	full-splice_match	199	201	93	77	26	1184	1	5	1786	0.111422	0.112542	0.0520717	0.0431131	0.0145577	0.662934	0.00055991	0.00279955	['ast', 'ex', 'inh', 'oli']
146	HSPA1B	full-splice_match	67	86	34	47	6	223	0	1	464	0.144397	0.185345	0.0732759	0.101293	0.012931	0.480603	0	0.00215517	['ast', 'ex', 'inh', 'mic', 'oli']
147	SNHG32	full-splice_match	10	18	12	3	3	138	0	0	184	0.0543478	0.0978261	0.0652174	0.0163043	0.0163043	0.75	0	0	['ast', 'ex', 'inh', 'oli']
149	SNHG32	full-splice_match	1	2	2	1	1	38	0	0	45	0.0222222	0.0444444	0.0444444	0.0222222	0.0222222	0.844444	0	0	['oli']
164	PSMB8	full-splice_match	1	0	0	2	2	10	0	2	17	0.0588235	0	0	0.117647	0.117647	0.588235	0	0.117647	['ast', 'end', 'mic', 'opc', 'oli']
178	PPP1R11	full-splice_match	2	8	1	0	1	21	0	1	34	0.0588235	0.235294	0.0294118	0	0.0294118	0.617647	0	0.0294118	['ast', 'ex', 'oli']
188	ABCF1	incomplete-splice_match	1	11	5	1	2	19	0	0	39	0.025641	0.282051	0.128205	0.025641	0.0512821	0.487179	0	0	['ex', 'inh', 'opc', 'oli']
193	MRPS18B	full-splice_match	2	2	2	3	1	44	0	1	55	0.0363636	0.0363636	0.0363636	0.0545455	0.0181818	0.8	0	0.0181818	['mic', 'oli']
196	MOG	full-splice_match	0	0	0	0	1	70	0	0	71	0	0	0	0	0.0140845	0.985915	0	0	['oli']
200	C6orf136	full-splice_match	4	45	19	0	1	18	0	0	87	0.045977	0.517241	0.218391	0	0.0114943	0.206897	0	0	['ex', 'inh', 'oli']
205	TUBB	full-splice_match	6	118	36	3	3	57	0	1	224	0.0267857	0.526786	0.160714	0.0133929	0.0133929	0.254464	0	0.00446429	['ex', 'inh', 'oli']
211	MOG	novel_not_in_catalog	0	0	0	0	0	97	0	0	97	0	0	0	0	0	1	0	0	['oli']
215	NFKBIL1	full-splice_match	0	1	2	0	0	4	0	0	7	0	0.142857	0.285714	0	0	0.571429	0	0	['ex', 'inh', 'oli']
220	AIF1	full-splice_match	0	0	1	14	0	1	0	1	17	0	0	0.0588235	0.823529	0	0.0588235	0	0.0588235	['end', 'inh', 'mic', 'oli']
221	AIF1	full-splice_match	1	2	0	42	0	4	0	5	54	0.0185185	0.037037	0	0.777778	0	0.0740741	0	0.0925926	['end', 'mic', 'oli']
225	PRRC2A	incomplete-splice_match	5	87	41	2	1	72	0	0	208	0.0240385	0.418269	0.197115	0.00961538	0.00480769	0.346154	0	0	['ex', 'inh', 'oli']
227	CSNK2B	full-splice_match	12	40	31	6	11	143	0	1	244	0.0491803	0.163934	0.127049	0.0245902	0.045082	0.586066	0	0.00409836	['ex', 'inh', 'oli']
230	HSPA1A	full-splice_match	119	128	60	141	21	848	0	8	1325	0.0898113	0.0966038	0.045283	0.106415	0.0158491	0.64	0	0.00603774	['ast', 'ex', 'mic', 'oli']
232	HSPA1B	full-splice_match	84	93	39	51	12	329	0	0	608	0.138158	0.152961	0.0641447	0.0838816	0.0197368	0.541118	0	0	['ast', 'ex', 'inh', 'mic', 'oli']
233	HSPA1B	novel_not_in_catalog	0	1	0	0	0	4	0	0	5	0	0.2	0	0	0	0.8	0	0	['ex', 'oli']
236	SNHG32	full-splice_match	1	5	5	2	2	38	0	0	53	0.0188679	0.0943396	0.0943396	0.0377358	0.0377358	0.716981	0	0	['ex', 'inh', 'oli']
237	SNHG32	full-splice_match	3	9	5	5	3	75	0	1	101	0.029703	0.0891089	0.049505	0.049505	0.029703	0.742574	0	0.00990099	['ex', 'oli']
242	SKIC2	incomplete-splice_match	6	11	5	1	1	16	1	0	41	0.146341	0.268293	0.121951	0.0243902	0.0243902	0.390244	0.0243902	0	['ast', 'ex', 'inh', 'oli']
245	EGFL8	incomplete-splice_match	0	0	1	0	1	6	0	0	8	0	0	0.125	0	0.125	0.75	0	0	['inh', 'opc', 'oli']
259	PSMB9	full-splice_match	0	0	0	4	2	19	0	0	25	0	0	0	0.16	0.08	0.76	0	0	['mic', 'opc', 'oli']
267	HLA-A	novel_not_in_catalog	7	0	2	3	8	15	0	1	36	0.194444	0	0.0555556	0.0833333	0.222222	0.416667	0	0.0277778	['ast', 'inh', 'mic', 'opc', 'oli']
273	HLA-DPB1	full-splice_match	1	11	5	14	0	3	0	1	35	0.0285714	0.314286	0.142857	0.4	0	0.0857143	0	0.0285714	['ex', 'inh', 'mic', 'oli']
287	GNL1	incomplete-splice_match	3	0	0	2	2	12	0	0	19	0.157895	0	0	0.105263	0.105263	0.631579	0	0	['ast', 'mic', 'opc', 'oli']
289	PPP1R10	incomplete-splice_match	11	27	14	8	4	35	1	0	100	0.11	0.27	0.14	0.08	0.04	0.35	0.01	0	['ast', 'ex', 'inh', 'mic', 'oli']
291	DHX16	incomplete-splice_match	1	1	1	2	0	5	0	0	10	0.1	0.1	0.1	0.2	0	0.5	0	0	['ast', 'ex', 'inh', 'mic', 'oli']
296	FLOT1	full-splice_match	2	20	12	5	2	34	0	0	75	0.0266667	0.266667	0.16	0.0666667	0.0266667	0.453333	0	0	['ex', 'inh', 'mic', 'oli']
301	IER3	full-splice_match	1	7	1	12	0	1	0	2	24	0.0416667	0.291667	0.0416667	0.5	0	0.0416667	0	0.0833333	['ex', 'end', 'mic']
302	HCG21	novel_not_in_catalog	1	0	0	0	1	7	0	0	9	0.111111	0	0	0	0.111111	0.777778	0	0	['ast', 'opc', 'oli']
305	ABHD16A	full-splice_match	4	31	7	3	2	28	0	0	75	0.0533333	0.413333	0.0933333	0.04	0.0266667	0.373333	0	0	['ast', 'ex', 'inh', 'oli']
309	DDAH2	full-splice_match	4	3	1	2	1	7	0	1	19	0.210526	0.157895	0.0526316	0.105263	0.0526316	0.368421	0	0.0526316	['ast', 'ex', 'end', 'inh', 'mic', 'opc', 'oli']
313	CLIC1	full-splice_match	1	0	1	12	0	2	0	4	20	0.05	0	0.05	0.6	0	0.1	0	0.2	['ast', 'end', 'inh', 'mic', 'oli']
315	VARS1	incomplete-splice_match	1	12	4	1	2	16	0	0	36	0.0277778	0.333333	0.111111	0.0277778	0.0555556	0.444444	0	0	['ex', 'inh', 'opc', 'oli']
318	LSM2	full-splice_match	9	21	9	4	9	144	1	1	198	0.0454545	0.106061	0.0454545	0.020202	0.0454545	0.727273	0.00505051	0.00505051	['ex', 'oli']
326	EHMT2	incomplete-splice_match	1	4	5	0	1	7	0	0	18	0.0555556	0.222222	0.277778	0	0.0555556	0.388889	0	0	['ast', 'ex', 'inh', 'opc', 'oli']
329	HLA-B	full-splice_match	8	2	4	24	7	7	0	3	55	0.145455	0.0363636	0.0727273	0.436364	0.127273	0.127273	0	0.0545455	['ast', 'end', 'inh', 'mic', 'opc', 'oli']
330	NELFE	full-splice_match	1	0	1	2	4	31	0	0	39	0.025641	0	0.025641	0.0512821	0.102564	0.794872	0	0	['mic', 'opc', 'oli']
334	NELFE	incomplete-splice_match	2	12	3	0	2	34	0	0	53	0.0377358	0.226415	0.0566038	0	0.0377358	0.641509	0	0	['ex', 'inh', 'oli']
348	PRRT1	full-splice_match	3	6	1	1	2	14	0	0	27	0.111111	0.222222	0.037037	0.037037	0.0740741	0.518519	0	0	['ast', 'ex', 'opc', 'oli']
351	PRRT1	full-splice_match	0	5	7	0	0	4	0	0	16	0	0.3125	0.4375	0	0	0.25	0	0	['ex', 'inh', 'oli']
361	HLA-DRB1	full-splice_match	9	2	1	94	1	1	0	4	112	0.0803571	0.0178571	0.00892857	0.839286	0.00892857	0.00892857	0	0.0357143	['ast', 'mic']
370	DDX39B	incomplete-splice_match	7	60	30	1	2	42	0	0	142	0.0492958	0.422535	0.211268	0.00704225	0.0140845	0.295775	0	0	['ex', 'inh', 'oli']
375	DDX39B	full-splice_match	2	0	4	1	1	18	0	0	26	0.0769231	0	0.153846	0.0384615	0.0384615	0.692308	0	0	['ast', 'inh', 'oli']
377	HLA-DPA1	full-splice_match	0	2	0	25	0	1	0	0	28	0	0.0714286	0	0.892857	0	0.0357143	0	0	['ex', 'mic']
388	ATP6V1G2	full-splice_match	13	82	69	0	6	57	0	0	227	0.0572687	0.361233	0.303965	0	0.0264317	0.251101	0	0	['ast', 'ex', 'inh', 'oli']
400	C6orf47	full-splice_match	2	8	7	0	1	20	0	1	39	0.0512821	0.205128	0.179487	0	0.025641	0.512821	0	0.025641	['ast', 'ex', 'inh', 'oli']
409	RING1	full-splice_match	11	30	10	3	3	21	0	0	78	0.141026	0.384615	0.128205	0.0384615	0.0384615	0.269231	0	0	['ast', 'ex', 'inh', 'oli']
410	RING1	novel_in_catalog	3	36	12	0	0	18	0	0	69	0.0434783	0.521739	0.173913	0	0	0.26087	0	0	['ex', 'inh', 'oli']
414	RPS18	full-splice_match	75	351	189	131	50	1107	1	16	1920	0.0390625	0.182812	0.0984375	0.0682292	0.0260417	0.576562	0.000520833	0.00833333	['ex', 'inh', 'mic', 'oli']
415	RPS18	incomplete-splice_match	1	7	2	3	0	14	0	1	28	0.0357143	0.25	0.0714286	0.107143	0	0.5	0	0.0357143	['ex', 'inh', 'mic', 'oli']
420	RPS18	incomplete-splice_match	1	4	5	7	2	35	0	0	54	0.0185185	0.0740741	0.0925926	0.12963	0.037037	0.648148	0	0	['ex', 'inh', 'mic', 'oli']
421	B3GALT4	full-splice_match	1	3	2	2	3	14	0	0	25	0.04	0.12	0.08	0.08	0.12	0.56	0	0	['ex', 'inh', 'mic', 'opc', 'oli']
426	PFDN6	full-splice_match	2	22	13	4	5	90	0	1	137	0.0145985	0.160584	0.0948905	0.0291971	0.0364964	0.656934	0	0.00729927	['ex', 'inh', 'oli']
428	PFDN6	full-splice_match	0	2	1	0	1	8	0	0	12	0	0.166667	0.0833333	0	0.0833333	0.666667	0	0	['ex', 'inh', 'opc', 'oli']
434	PFDN6	incomplete-splice_match	2	2	3	0	0	7	0	0	14	0.142857	0.142857	0.214286	0	0	0.5	0	0	['ast', 'ex', 'inh', 'oli']
442	RGL2	incomplete-splice_match	18	57	22	5	5	11	0	1	119	0.151261	0.478992	0.184874	0.0420168	0.0420168	0.092437	0	0.00840336	['ast', 'ex', 'inh', 'oli']
443	RGL2	incomplete-splice_match	8	3	1	4	2	7	0	0	25	0.32	0.12	0.04	0.16	0.08	0.28	0	0	['ast', 'ex', 'mic', 'opc', 'oli']
447	DAXX	incomplete-splice_match	0	11	4	3	1	17	0	0	36	0	0.305556	0.111111	0.0833333	0.0277778	0.472222	0	0	['ex', 'inh', 'mic', 'oli']
458	MOG	full-splice_match	0	0	0	0	0	79	0	0	79	0	0	0	0	0	1	0	0	['oli']
460	MOG	novel_not_in_catalog	1	0	0	0	0	59	0	0	60	0.0166667	0	0	0	0	0.983333	0	0	['oli']
470	HLA-A	full-splice_match	35	11	27	30	56	151	0	5	315	0.111111	0.0349206	0.0857143	0.0952381	0.177778	0.479365	0	0.015873	['ast', 'inh', 'mic', 'opc', 'oli']
479	HLA-H	novel_in_catalog	7	4	15	12	11	47	0	0	96	0.0729167	0.0416667	0.15625	0.125	0.114583	0.489583	0	0	['ast', 'inh', 'mic', 'opc', 'oli']
480	PPP1R11	full-splice_match	4	18	6	0	1	25	0	1	55	0.0727273	0.327273	0.109091	0	0.0181818	0.454545	0	0.0181818	['ast', 'ex', 'inh', 'oli']
486	POLR1H	full-splice_match	0	3	3	0	0	6	0	0	12	0	0.25	0.25	0	0	0.5	0	0	['ex', 'inh', 'oli']
488	RPP21	full-splice_match	4	17	15	1	2	73	0	0	112	0.0357143	0.151786	0.133929	0.00892857	0.0178571	0.651786	0	0	['ex', 'inh', 'oli']
494	RPP21	full-splice_match	1	8	2	1	1	5	0	0	18	0.0555556	0.444444	0.111111	0.0555556	0.0555556	0.277778	0	0	['ast', 'ex', 'inh', 'mic', 'opc', 'oli']
495	RPP21	full-splice_match	3	7	1	2	0	5	0	0	18	0.166667	0.388889	0.0555556	0.111111	0	0.277778	0	0	['ast', 'ex', 'inh', 'mic', 'oli']
504	ABCF1	incomplete-splice_match	2	4	3	0	3	13	0	1	26	0.0769231	0.153846	0.115385	0	0.115385	0.5	0	0.0384615	['ast', 'ex', 'inh', 'opc', 'oli']
509	MRPS18B	full-splice_match	1	6	1	1	2	40	0	0	51	0.0196078	0.117647	0.0196078	0.0196078	0.0392157	0.784314	0	0	['ex', 'oli']
513	C6orf136	full-splice_match	4	28	9	1	0	17	0	0	59	0.0677966	0.474576	0.152542	0.0169492	0	0.288136	0	0	['ast', 'ex', 'inh', 'oli']
517	novelGene_IER3_AS	antisense	2	7	1	0	0	1	0	0	11	0.181818	0.636364	0.0909091	0	0	0.0909091	0	0	['ast', 'ex', 'inh', 'oli']
541	PPP1R10	incomplete-splice_match	7	19	3	5	0	15	0	0	49	0.142857	0.387755	0.0612245	0.102041	0	0.306122	0	0	['ast', 'ex', 'inh', 'mic', 'oli']
545	FLOT1	full-splice_match	1	65	18	4	1	36	0	0	125	0.008	0.52	0.144	0.032	0.008	0.288	0	0	['ex', 'inh', 'oli']
546	FLOT1	incomplete-splice_match	2	16	6	1	0	3	0	0	28	0.0714286	0.571429	0.214286	0.0357143	0	0.107143	0	0	['ast', 'ex', 'inh', 'oli']
553	IER3	full-splice_match	3	4	3	9	1	2	0	0	22	0.136364	0.181818	0.136364	0.409091	0.0454545	0.0909091	0	0	['ast', 'ex', 'inh', 'mic', 'oli']
555	POLR1HASP	full-splice_match	1	4	5	0	0	18	0	0	28	0.0357143	0.142857	0.178571	0	0	0.642857	0	0	['ex', 'inh', 'oli']
560	DDX39B	incomplete-splice_match	7	21	11	3	4	33	0	0	79	0.0886076	0.265823	0.139241	0.0379747	0.0506329	0.417722	0	0	['ast', 'ex', 'inh', 'opc', 'oli']
571	ATP6V1G2	full-splice_match	9	182	57	0	6	37	0	1	292	0.0308219	0.623288	0.195205	0	0.0205479	0.126712	0	0.00342466	['ex', 'inh', 'oli']
577	NFKBIL1	full-splice_match	1	4	3	0	1	7	0	0	16	0.0625	0.25	0.1875	0	0.0625	0.4375	0	0	['ast', 'ex', 'inh', 'opc', 'oli']
581	AIF1	full-splice_match	2	2	0	41	0	3	0	2	50	0.04	0.04	0	0.82	0	0.06	0	0.04	['mic', 'oli']
588	PRRC2A	incomplete-splice_match	2	6	0	0	0	4	0	0	12	0.166667	0.5	0	0	0	0.333333	0	0	['ast', 'ex', 'oli']
598	C6orf47	full-splice_match	1	6	6	0	4	26	0	0	43	0.0232558	0.139535	0.139535	0	0.0930233	0.604651	0	0	['ex', 'inh', 'opc', 'oli']
602	CSNK2B	novel_in_catalog	5	7	4	1	3	10	0	1	31	0.16129	0.225806	0.129032	0.0322581	0.0967742	0.322581	0	0.0322581	['ast', 'ex', 'inh', 'opc', 'oli']
603	CSNK2B	full-splice_match	7	47	20	3	15	144	1	1	238	0.0294118	0.197479	0.0840336	0.012605	0.0630252	0.605042	0.00420168	0.00420168	['ex', 'inh', 'opc', 'oli']
610	ABHD16A	full-splice_match	5	29	7	1	7	33	0	0	82	0.0609756	0.353659	0.0853659	0.0121951	0.0853659	0.402439	0	0	['ast', 'ex', 'inh', 'opc', 'oli']
615	CLIC1	full-splice_match	1	1	0	7	0	0	0	5	14	0.0714286	0.0714286	0	0.5	0	0	0	0.357143	['ast', 'ex', 'end', 'mic']
619	LSM2	full-splice_match	12	25	8	2	6	137	0	0	190	0.0631579	0.131579	0.0421053	0.0105263	0.0315789	0.721053	0	0	['ast', 'ex', 'oli']
623	HSPA1A	full-splice_match	45	81	25	78	6	258	0	4	497	0.0905433	0.162978	0.0503018	0.156942	0.0120724	0.519115	0	0.00804829	['ast', 'ex', 'inh', 'mic', 'oli']
625	HSPA1B	full-splice_match	89	94	27	99	9	422	0	4	744	0.119624	0.126344	0.0362903	0.133065	0.0120968	0.567204	0	0.00537634	['ast', 'ex', 'mic', 'oli']
627	SNHG32	full-splice_match	6	35	21	5	0	141	0	0	208	0.0288462	0.168269	0.100962	0.0240385	0	0.677885	0	0	['ex', 'inh', 'oli']
629	SNHG32	full-splice_match	0	2	1	1	2	14	0	0	20	0	0.1	0.05	0.05	0.1	0.7	0	0	['ex', 'inh', 'mic', 'opc', 'oli']
632	NEU1	full-splice_match	2	5	5	1	2	7	0	0	22	0.0909091	0.227273	0.227273	0.0454545	0.0909091	0.318182	0	0	['ast', 'ex', 'inh', 'opc', 'oli']
633	NEU1	incomplete-splice_match	2	9	3	1	0	2	0	0	17	0.117647	0.529412	0.176471	0.0588235	0	0.117647	0	0	['ast', 'ex', 'inh', 'mic', 'oli']
639	NELFE	full-splice_match	1	1	3	0	3	24	0	0	32	0.03125	0.03125	0.09375	0	0.09375	0.75	0	0	['inh', 'opc', 'oli']
641	NELFE	incomplete-splice_match	3	2	1	0	1	15	0	1	23	0.130435	0.0869565	0.0434783	0	0.0434783	0.652174	0	0.0434783	['ast', 'ex', 'oli']
642	SKIC2	incomplete-splice_match	2	5	4	1	0	6	0	0	18	0.111111	0.277778	0.222222	0.0555556	0	0.333333	0	0	['ast', 'ex', 'inh', 'mic', 'oli']
653	ATF6B	full-splice_match	4	26	12	0	0	15	0	1	58	0.0689655	0.448276	0.206897	0	0	0.258621	0	0.0172414	['ast', 'ex', 'inh', 'oli']
667	PSMB9	full-splice_match	0	0	1	1	3	24	0	0	29	0	0	0.0344828	0.0344828	0.103448	0.827586	0	0	['opc', 'oli']
673	HLA-DMA	full-splice_match	2	0	0	12	0	1	0	0	15	0.133333	0	0	0.8	0	0.0666667	0	0	['ast', 'mic', 'oli']
677	BRD2	incomplete-splice_match	7	7	13	7	6	75	0	1	116	0.0603448	0.0603448	0.112069	0.0603448	0.0517241	0.646552	0	0.00862069	['ast', 'ex', 'inh', 'mic', 'opc', 'oli']
681	HLA-DPA1	incomplete-splice_match	0	0	0	19	0	1	0	1	21	0	0	0	0.904762	0	0.047619	0	0.047619	['mic']
689	RING1	full-splice_match	11	17	8	1	3	28	0	0	68	0.161765	0.25	0.117647	0.0147059	0.0441176	0.411765	0	0	['ast', 'ex', 'inh', 'oli']
691	RING1	incomplete-splice_match	3	4	3	1	1	3	0	0	15	0.2	0.266667	0.2	0.0666667	0.0666667	0.2	0	0	['ast', 'ex', 'inh', 'mic', 'opc', 'oli']
698	RPS18	incomplete-splice_match	3	9	2	5	4	25	0	0	48	0.0625	0.1875	0.0416667	0.104167	0.0833333	0.520833	0	0	['ast', 'ex', 'mic', 'opc', 'oli']
700	RPS18	full-splice_match	112	432	187	138	69	1407	2	26	2373	0.0471976	0.182048	0.0788032	0.0581542	0.0290771	0.59292	0.000842815	0.0109566	['ex', 'inh', 'mic', 'oli']
705	B3GALT4	full-splice_match	4	6	3	2	1	33	0	0	49	0.0816327	0.122449	0.0612245	0.0408163	0.0204082	0.673469	0	0	['ast', 'ex', 'inh', 'oli']
712	PFDN6	full-splice_match	2	20	12	4	3	74	2	0	117	0.017094	0.17094	0.102564	0.034188	0.025641	0.632479	0.017094	0	['ex', 'inh', 'oli']
715	PFDN6	incomplete-splice_match	2	5	3	2	0	3	0	0	15	0.133333	0.333333	0.2	0.133333	0	0.2	0	0	['ast', 'ex', 'inh', 'mic', 'oli']
720	PFDN6	full-splice_match	4	11	7	0	2	36	0	0	60	0.0666667	0.183333	0.116667	0	0.0333333	0.6	0	0	['ast', 'ex', 'inh', 'oli']
721	PFDN6	full-splice_match	2	2	2	0	1	1	0	0	8	0.25	0.25	0.25	0	0.125	0.125	0	0	['ast', 'ex', 'inh', 'opc', 'oli']
724	PFDN6	incomplete-splice_match	1	3	1	0	0	6	0	0	11	0.0909091	0.272727	0.0909091	0	0	0.545455	0	0	['ast', 'ex', 'inh', 'oli']
727	RGL2	incomplete-splice_match	53	41	33	23	6	25	1	2	184	0.288043	0.222826	0.179348	0.125	0.0326087	0.13587	0.00543478	0.0108696	['ast', 'ex', 'inh', 'mic', 'oli']
732	DAXX	incomplete-splice_match	1	24	5	0	1	16	0	0	47	0.0212766	0.510638	0.106383	0	0.0212766	0.340426	0	0	['ex', 'inh', 'oli']
734	MOG	full-splice_match	0	0	0	0	2	158	0	0	160	0	0	0	0	0.0125	0.9875	0	0	['oli']
735	MOG	novel_not_in_catalog	0	1	0	0	0	46	0	0	47	0	0.0212766	0	0	0	0.978723	0	0	['oli']
737	MOG	novel_not_in_catalog	0	0	0	0	0	61	0	0	61	0	0	0	0	0	1	0	0	['oli']
747	POLR1HASP	full-splice_match	4	13	6	0	0	20	0	0	43	0.0930233	0.302326	0.139535	0	0	0.465116	0	0	['ast', 'ex', 'inh', 'oli']
753	POLR1H	full-splice_match	2	3	3	0	1	1	0	2	12	0.166667	0.25	0.25	0	0.0833333	0.0833333	0	0.166667	['ast', 'ex', 'end', 'inh', 'opc', 'oli']
768	ABCF1	incomplete-splice_match	6	14	8	1	1	17	0	0	47	0.12766	0.297872	0.170213	0.0212766	0.0212766	0.361702	0	0	['ast', 'ex', 'inh', 'oli']
772	PPP1R10	incomplete-splice_match	23	112	24	17	15	130	0	1	322	0.0714286	0.347826	0.0745342	0.052795	0.0465839	0.403727	0	0.00310559	['ast', 'ex', 'inh', 'mic', 'oli']
774	MRPS18B	full-splice_match	5	13	1	4	3	50	0	0	76	0.0657895	0.171053	0.0131579	0.0526316	0.0394737	0.657895	0	0	['ast', 'ex', 'mic', 'oli']
776	C6orf136	full-splice_match	0	22	6	0	0	7	0	1	36	0	0.611111	0.166667	0	0	0.194444	0	0.0277778	['ex', 'inh', 'oli']
777	TUBB	full-splice_match	9	86	36	3	7	40	0	0	181	0.0497238	0.475138	0.198895	0.0165746	0.038674	0.220994	0	0	['ex', 'inh', 'oli']
779	FLOT1	incomplete-splice_match	2	21	9	0	1	11	0	0	44	0.0454545	0.477273	0.204545	0	0.0227273	0.25	0	0	['ex', 'inh', 'oli']
781	FLOT1	full-splice_match	7	63	19	4	4	73	0	1	171	0.0409357	0.368421	0.111111	0.0233918	0.0233918	0.426901	0	0.00584795	['ex', 'inh', 'oli']
782	FLOT1	incomplete-splice_match	4	28	5	0	0	13	0	0	50	0.08	0.56	0.1	0	0	0.26	0	0	['ast', 'ex', 'inh', 'oli']
785	IER3	full-splice_match	3	13	2	12	1	2	0	2	35	0.0857143	0.371429	0.0571429	0.342857	0.0285714	0.0571429	0	0.0571429	['ast', 'ex', 'end', 'inh', 'mic', 'oli']
791	DDR1	incomplete-splice_match	5	1	4	0	0	30	0	0	40	0.125	0.025	0.1	0	0	0.75	0	0	['ast', 'inh', 'oli']
792	DDR1	incomplete-splice_match	20	9	10	1	12	111	0	0	163	0.122699	0.0552147	0.0613497	0.00613497	0.0736196	0.680982	0	0	['ast', 'ex', 'inh', 'opc', 'oli']
805	NFKBIL1	full-splice_match	4	5	0	1	0	18	0	0	28	0.142857	0.178571	0	0.0357143	0	0.642857	0	0	['ast', 'ex', 'oli']
817	CSNK2B	full-splice_match	4	40	20	3	8	130	1	0	206	0.0194175	0.194175	0.0970874	0.0145631	0.038835	0.631068	0.00485437	0	['ex', 'inh', 'oli']
821	CSNK2B	novel_in_catalog	3	6	15	0	0	15	0	0	39	0.0769231	0.153846	0.384615	0	0	0.384615	0	0	['ast', 'ex', 'inh', 'oli']
834	DDX39B	full-splice_match	5	35	14	5	3	34	0	1	97	0.0515464	0.360825	0.14433	0.0515464	0.0309278	0.350515	0	0.0103093	['ast', 'ex', 'inh', 'mic', 'oli']
839	ATP6V1G2	full-splice_match	3	153	52	2	4	34	0	0	248	0.0120968	0.616935	0.209677	0.00806452	0.016129	0.137097	0	0	['ex', 'inh', 'oli']
851	C6orf47	full-splice_match	2	6	13	0	1	19	0	0	41	0.0487805	0.146341	0.317073	0	0.0243902	0.463415	0	0	['ex', 'inh', 'oli']
855	CLIC1	full-splice_match	0	0	0	10	1	0	1	4	16	0	0	0	0.625	0.0625	0	0.0625	0.25	['end', 'mic', 'opc', 'per']
869	PSMB9	full-splice_match	0	0	0	2	1	17	0	3	23	0	0	0	0.0869565	0.0434783	0.73913	0	0.130435	['end', 'mic', 'oli']
878	BRD2	incomplete-splice_match	2	8	3	1	0	15	0	0	29	0.0689655	0.275862	0.103448	0.0344828	0	0.517241	0	0	['ast', 'ex', 'inh', 'oli']
879	BRD2	full-splice_match	2	4	4	0	1	4	0	0	15	0.133333	0.266667	0.266667	0	0.0666667	0.266667	0	0	['ast', 'ex', 'inh', 'opc', 'oli']
884	SLC39A7	incomplete-splice_match	1	1	0	0	3	9	0	0	14	0.0714286	0.0714286	0	0	0.214286	0.642857	0	0	['ast', 'ex', 'opc', 'oli']
888	RING1	incomplete-splice_match	2	5	3	1	0	2	0	0	13	0.153846	0.384615	0.230769	0.0769231	0	0.153846	0	0	['ast', 'ex', 'inh', 'mic', 'oli']
891	RING1	incomplete-splice_match	25	78	35	6	3	33	0	1	181	0.138122	0.430939	0.19337	0.0331492	0.0165746	0.18232	0	0.00552486	['ast', 'ex', 'inh', 'oli']
892	VPS52	incomplete-splice_match	10	1	7	3	2	22	0	0	45	0.222222	0.0222222	0.155556	0.0666667	0.0444444	0.488889	0	0	['ast', 'inh', 'mic', 'oli']
893	TRIM27	full-splice_match	7	38	15	7	9	44	1	0	121	0.0578512	0.31405	0.123967	0.0578512	0.0743802	0.363636	0.00826446	0	['ast', 'ex', 'inh', 'mic', 'opc', 'oli']
894	TRIM27	incomplete-splice_match	1	5	3	0	2	4	0	0	15	0.0666667	0.333333	0.2	0	0.133333	0.266667	0	0	['ast', 'ex', 'inh', 'opc', 'oli']
904	MOG	full-splice_match	0	2	1	0	0	132	0	0	135	0	0.0148148	0.00740741	0	0	0.977778	0	0	['oli']
918	HLA-A	incomplete-splice_match	21	7	25	15	25	41	1	3	138	0.152174	0.0507246	0.181159	0.108696	0.181159	0.297101	0.00724638	0.0217391	['ast', 'ex', 'inh', 'mic', 'opc', 'oli']
922	HLA-A	incomplete-splice_match	2	6	9	3	3	10	0	1	34	0.0588235	0.176471	0.264706	0.0882353	0.0882353	0.294118	0	0.0294118	['ast', 'ex', 'inh', 'mic', 'opc', 'oli']
928	POLR1H	full-splice_match	0	2	1	0	2	8	0	0	13	0	0.153846	0.0769231	0	0.153846	0.615385	0	0	['ex', 'inh', 'opc', 'oli']
933	POLR1HASP	full-splice_match	0	11	4	0	2	20	0	0	37	0	0.297297	0.108108	0	0.0540541	0.540541	0	0	['ex', 'inh', 'opc', 'oli']
941	ABCF1	incomplete-splice_match	4	12	4	1	3	27	0	1	52	0.0769231	0.230769	0.0769231	0.0192308	0.0576923	0.519231	0	0.0192308	['ast', 'ex', 'inh', 'opc', 'oli']
942	ABCF1	incomplete-splice_match	0	2	3	1	1	4	0	0	11	0	0.181818	0.272727	0.0909091	0.0909091	0.363636	0	0	['ex', 'inh', 'mic', 'opc', 'oli']
945	MRPS18B	full-splice_match	1	0	1	0	1	31	0	0	34	0.0294118	0	0.0294118	0	0.0294118	0.911765	0	0	['oli']
950	C6orf136	full-splice_match	2	2	5	0	1	16	0	0	26	0.0769231	0.0769231	0.192308	0	0.0384615	0.615385	0	0	['ast', 'ex', 'inh', 'oli']
956	NFKBIL1	incomplete-splice_match	3	2	3	0	0	12	0	0	20	0.15	0.1	0.15	0	0	0.6	0	0	['ast', 'ex', 'inh', 'oli']
957	AIF1	full-splice_match	1	1	0	26	0	0	0	0	28	0.0357143	0.0357143	0	0.928571	0	0	0	0	['mic']
965	PRRC2A	incomplete-splice_match	18	52	35	6	8	62	0	0	181	0.0994475	0.287293	0.19337	0.0331492	0.0441989	0.342541	0	0	['ast', 'ex', 'inh', 'oli']
981	STK19B	incomplete-splice_match	5	20	10	0	0	2	0	0	37	0.135135	0.540541	0.27027	0	0	0.0540541	0	0	['ast', 'ex', 'inh', 'oli']
984	EGFL8	incomplete-splice_match	5	15	9	1	2	12	0	0	44	0.113636	0.340909	0.204545	0.0227273	0.0454545	0.272727	0	0	['ast', 'ex', 'inh', 'oli']
988	GNL1	incomplete-splice_match	1	5	2	1	0	11	0	0	20	0.05	0.25	0.1	0.05	0	0.55	0	0	['ast', 'ex', 'inh', 'mic', 'oli']
991	PPP1R10	incomplete-splice_match	22	82	24	19	5	82	1	0	235	0.093617	0.348936	0.102128	0.0808511	0.0212766	0.348936	0.00425532	0	['ast', 'ex', 'inh', 'mic', 'oli']
996	PPP1R18	full-splice_match	0	0	0	7	1	2	0	0	10	0	0	0	0.7	0.1	0.2	0	0	['mic', 'opc', 'oli']
997	MDC1	incomplete-splice_match	1	3	3	1	0	10	0	0	18	0.0555556	0.166667	0.166667	0.0555556	0	0.555556	0	0	['ast', 'ex', 'inh', 'mic', 'oli']
1002	DDAH2	full-splice_match	2	3	0	1	2	7	0	1	16	0.125	0.1875	0	0.0625	0.125	0.4375	0	0.0625	['ast', 'ex', 'end', 'mic', 'opc', 'oli']
1004	CLIC1	full-splice_match	1	0	0	15	0	0	0	0	16	0.0625	0	0	0.9375	0	0	0	0	['ast', 'mic']
1008	LSM2	full-splice_match	7	20	9	6	8	114	0	0	164	0.0426829	0.121951	0.054878	0.0365854	0.0487805	0.695122	0	0	['ex', 'inh', 'oli']
1011	NEU1	full-splice_match	1	8	7	1	2	4	0	0	23	0.0434783	0.347826	0.304348	0.0434783	0.0869565	0.173913	0	0	['ex', 'inh', 'opc', 'oli']
1014	EHMT2	incomplete-splice_match	4	40	10	0	0	2	0	0	56	0.0714286	0.714286	0.178571	0	0	0.0357143	0	0	['ast', 'ex', 'inh']
1018	NELFE	full-splice_match	0	0	0	1	3	15	0	0	19	0	0	0	0.0526316	0.157895	0.789474	0	0	['mic', 'opc', 'oli']
1021	NELFE	incomplete-splice_match	5	5	6	1	4	43	0	0	64	0.078125	0.078125	0.09375	0.015625	0.0625	0.671875	0	0	['ast', 'ex', 'inh', 'opc', 'oli']
1031	HLA-C	full-splice_match	17	24	8	35	26	45	0	5	160	0.10625	0.15	0.05	0.21875	0.1625	0.28125	0	0.03125	['ast', 'ex', 'inh', 'mic', 'opc', 'oli']
1041	DDX39B	incomplete-splice_match	1	15	8	2	1	8	0	1	36	0.0277778	0.416667	0.222222	0.0555556	0.0277778	0.222222	0	0.0277778	['ex', 'inh', 'mic', 'oli']
1047	ATP6V1G2	full-splice_match	6	198	55	1	4	25	0	0	289	0.0207612	0.685121	0.190311	0.00346021	0.0138408	0.0865052	0	0	['ex', 'inh', 'oli']
1054	C6orf47	full-splice_match	2	3	6	1	2	28	0	1	43	0.0465116	0.0697674	0.139535	0.0232558	0.0465116	0.651163	0	0.0232558	['ex', 'inh', 'oli']
1055	ABHD16A	full-splice_match	5	16	5	1	3	26	0	0	56	0.0892857	0.285714	0.0892857	0.0178571	0.0535714	0.464286	0	0	['ast', 'ex', 'inh', 'opc', 'oli']
1063	PSMB8	full-splice_match	3	0	1	3	8	12	1	3	31	0.0967742	0	0.0322581	0.0967742	0.258065	0.387097	0.0322581	0.0967742	['ast', 'end', 'mic', 'opc', 'oli']
1068	BRD2	incomplete-splice_match	1	8	9	1	0	23	0	0	42	0.0238095	0.190476	0.214286	0.0238095	0	0.547619	0	0	['ex', 'inh', 'oli']
1069	HLA-DPA1	incomplete-splice_match	1	0	1	27	0	2	0	1	32	0.03125	0	0.03125	0.84375	0	0.0625	0	0.03125	['mic', 'oli']
1072	SLC39A7	full-splice_match	0	2	3	4	4	33	0	0	46	0	0.0434783	0.0652174	0.0869565	0.0869565	0.717391	0	0	['inh', 'mic', 'opc', 'oli']
1077	RING1	incomplete-splice_match	3	1	2	0	1	5	0	0	12	0.25	0.0833333	0.166667	0	0.0833333	0.416667	0	0	['ast', 'ex', 'inh', 'opc', 'oli']
1081	VPS52	incomplete-splice_match	3	10	5	1	2	23	0	0	44	0.0681818	0.227273	0.113636	0.0227273	0.0454545	0.522727	0	0	['ast', 'ex', 'inh', 'oli']
1082	RPS18	full-splice_match	37	272	110	87	34	633	4	17	1194	0.0309883	0.227806	0.0921273	0.0728643	0.0284757	0.530151	0.00335008	0.0142379	['ex', 'inh', 'mic', 'oli']
1083	RPS18	incomplete-splice_match	0	1	2	1	0	9	0	0	13	0	0.0769231	0.153846	0.0769231	0	0.692308	0	0	['ex', 'inh', 'mic', 'oli']
1085	RPS18	incomplete-splice_match	1	8	2	2	0	13	0	4	30	0.0333333	0.266667	0.0666667	0.0666667	0	0.433333	0	0.133333	['ex', 'end', 'inh', 'mic', 'oli']
1087	RPS18	full-splice_match	3	3	0	0	0	5	0	0	11	0.272727	0.272727	0	0	0	0.454545	0	0	['ast', 'ex', 'oli']
1090	B3GALT4	full-splice_match	6	11	2	1	3	31	0	0	54	0.111111	0.203704	0.037037	0.0185185	0.0555556	0.574074	0	0	['ast', 'ex', 'opc', 'oli']
1091	WDR46	incomplete-splice_match	2	25	5	1	0	1	0	0	34	0.0588235	0.735294	0.147059	0.0294118	0	0.0294118	0	0	['ast', 'ex', 'inh']
1093	PFDN6	full-splice_match	0	7	9	1	2	21	0	0	40	0	0.175	0.225	0.025	0.05	0.525	0	0	['ex', 'inh', 'opc', 'oli']
1097	PFDN6	full-splice_match	0	4	1	2	1	3	0	0	11	0	0.363636	0.0909091	0.181818	0.0909091	0.272727	0	0	['ex', 'inh', 'mic', 'opc', 'oli']
1099	PFDN6	full-splice_match	8	19	12	6	5	85	0	0	135	0.0592593	0.140741	0.0888889	0.0444444	0.037037	0.62963	0	0	['ast', 'ex', 'inh', 'oli']
1101	PFDN6	incomplete-splice_match	0	2	1	0	0	4	0	0	7	0	0.285714	0.142857	0	0	0.571429	0	0	['ex', 'inh', 'oli']
1104	PFDN6	novel_not_in_catalog	1	0	0	0	0	9	0	0	10	0.1	0	0	0	0	0.9	0	0	['ast', 'oli']
1110	DAXX	incomplete-splice_match	4	30	11	4	2	20	1	1	73	0.0547945	0.410959	0.150685	0.0547945	0.0273973	0.273973	0.0136986	0.0136986	['ast', 'ex', 'inh', 'mic', 'oli']
1127	MOG	full-splice_match	0	0	1	0	0	70	0	0	71	0	0	0.0140845	0	0	0.985915	0	0	['oli']
1128	MOG	novel_not_in_catalog	0	0	0	1	0	60	0	0	61	0	0	0	0.0163934	0	0.983607	0	0	['oli']
1129	MOG	novel_not_in_catalog	0	0	0	1	0	39	0	0	40	0	0	0	0.025	0	0.975	0	0	['oli']
1132	MOG	incomplete-splice_match	0	2	0	0	0	20	0	0	22	0	0.0909091	0	0	0	0.909091	0	0	['ex', 'oli']
1133	MOG	novel_not_in_catalog	0	0	0	0	0	21	0	0	21	0	0	0	0	0	1	0	0	['oli']
1137	RPP21	full-splice_match	2	21	12	9	3	88	0	0	135	0.0148148	0.155556	0.0888889	0.0666667	0.0222222	0.651852	0	0	['ex', 'inh', 'mic', 'oli']
1140	RPP21	full-splice_match	1	15	4	1	3	11	0	0	35	0.0285714	0.428571	0.114286	0.0285714	0.0857143	0.314286	0	0	['ex', 'inh', 'opc', 'oli']
1142	RPP21	full-splice_match	0	9	2	0	1	8	0	0	20	0	0.45	0.1	0	0.05	0.4	0	0	['ex', 'inh', 'opc', 'oli']
1155	ABCF1	full-splice_match	2	0	1	0	1	9	0	0	13	0.153846	0	0.0769231	0	0.0769231	0.692308	0	0	['ast', 'inh', 'opc', 'oli']
1157	MRPS18B	full-splice_match	2	0	0	1	0	34	0	0	37	0.0540541	0	0	0.027027	0	0.918919	0	0	['ast', 'oli']
1159	ABCF1	incomplete-splice_match	0	1	1	0	0	6	0	0	8	0	0.125	0.125	0	0	0.75	0	0	['ex', 'inh', 'oli']
1163	C6orf136	full-splice_match	3	12	14	4	0	23	0	0	56	0.0535714	0.214286	0.25	0.0714286	0	0.410714	0	0	['ast', 'ex', 'inh', 'mic', 'oli']
1165	ABCF1	incomplete-splice_match	0	5	2	1	0	8	0	0	16	0	0.3125	0.125	0.0625	0	0.5	0	0	['ex', 'inh', 'mic', 'oli']
1167	TUBB	full-splice_match	41	581	142	25	37	297	0	5	1128	0.0363475	0.515071	0.125887	0.0221631	0.0328014	0.263298	0	0.00443262	['ex', 'inh', 'oli']
1168	novelGene_IER3_AS	antisense	1	1	2	0	0	6	0	0	10	0.1	0.1	0.2	0	0	0.6	0	0	['ast', 'ex', 'inh', 'oli']
1172	DDR1	incomplete-splice_match	9	6	3	2	10	193	0	0	223	0.0403587	0.0269058	0.0134529	0.00896861	0.044843	0.865471	0	0	['oli']
1179	VARS2	incomplete-splice_match	4	14	6	0	0	4	0	0	28	0.142857	0.5	0.214286	0	0	0.142857	0	0	['ast', 'ex', 'inh', 'oli']
1187	PPP1R10	incomplete-splice_match	13	29	9	4	6	43	0	0	104	0.125	0.278846	0.0865385	0.0384615	0.0576923	0.413462	0	0	['ast', 'ex', 'inh', 'opc', 'oli']
1195	FLOT1	incomplete-splice_match	4	22	13	1	0	12	0	1	53	0.0754717	0.415094	0.245283	0.0188679	0	0.226415	0	0.0188679	['ast', 'ex', 'inh', 'oli']
1200	FLOT1	incomplete-splice_match	3	22	3	5	2	17	0	0	52	0.0576923	0.423077	0.0576923	0.0961538	0.0384615	0.326923	0	0	['ast', 'ex', 'inh', 'mic', 'oli']
1203	IER3	full-splice_match	1	20	5	17	2	4	0	3	52	0.0192308	0.384615	0.0961538	0.326923	0.0384615	0.0769231	0	0.0576923	['ex', 'end', 'inh', 'mic', 'oli']
1210	AIF1	full-splice_match	1	1	0	46	0	1	0	6	55	0.0181818	0.0181818	0	0.836364	0	0.0181818	0	0.109091	['end', 'mic']
1224	DDX39B	full-splice_match	3	2	3	5	6	21	0	0	40	0.075	0.05	0.075	0.125	0.15	0.525	0	0	['ast', 'ex', 'inh', 'mic', 'opc', 'oli']
1229	DDX39B	incomplete-splice_match	2	3	0	2	0	3	0	0	10	0.2	0.3	0	0.2	0	0.3	0	0	['ast', 'ex', 'mic', 'oli']
1232	DDX39B	incomplete-splice_match	11	43	15	4	2	14	0	0	89	0.123596	0.483146	0.168539	0.0449438	0.0224719	0.157303	0	0	['ast', 'ex', 'inh', 'oli']
1235	ATP6V1G2	full-splice_match	1	119	47	1	4	29	0	0	201	0.00497512	0.59204	0.233831	0.00497512	0.0199005	0.144279	0	0	['ex', 'inh', 'oli']
1240	C6orf47	full-splice_match	3	4	2	0	0	22	0	0	31	0.0967742	0.129032	0.0645161	0	0	0.709677	0	0	['ast', 'ex', 'inh', 'oli']
1243	CSNK2B	full-splice_match	7	69	21	3	4	90	0	2	196	0.0357143	0.352041	0.107143	0.0153061	0.0204082	0.459184	0	0.0102041	['ex', 'inh', 'oli']
1248	DDAH2	full-splice_match	7	3	0	4	7	8	0	1	30	0.233333	0.1	0	0.133333	0.233333	0.266667	0	0.0333333	['ast', 'ex', 'mic', 'opc', 'oli']
1249	CLIC1	full-splice_match	0	0	0	5	0	0	0	3	8	0	0	0	0.625	0	0	0	0.375	['end', 'mic']
1251	LSM2	full-splice_match	8	14	5	1	6	124	0	0	158	0.0506329	0.0886076	0.0316456	0.00632911	0.0379747	0.78481	0	0	['ast', 'ex', 'oli']
1254	HSPA1A	full-splice_match	118	143	44	82	24	476	0	10	897	0.13155	0.15942	0.0490524	0.0914158	0.0267559	0.530658	0	0.0111483	['ast', 'ex', 'mic', 'oli']
1255	HSPA1B	full-splice_match	60	31	11	48	5	209	0	0	364	0.164835	0.0851648	0.0302198	0.131868	0.0137363	0.574176	0	0	['ast', 'ex', 'mic', 'oli']
1257	SNHG32	full-splice_match	1	4	5	0	0	25	0	0	35	0.0285714	0.114286	0.142857	0	0	0.714286	0	0	['ex', 'inh', 'oli']
1258	SNHG32	full-splice_match	4	21	12	2	1	129	0	0	169	0.0236686	0.12426	0.0710059	0.0118343	0.00591716	0.763314	0	0	['ex', 'inh', 'oli']
1261	SNHG32	full-splice_match	2	4	2	0	1	5	0	0	14	0.142857	0.285714	0.142857	0	0.0714286	0.357143	0	0	['ast', 'ex', 'inh', 'opc', 'oli']
1285	NELFE	full-splice_match	2	1	2	1	1	13	0	0	20	0.1	0.05	0.1	0.05	0.05	0.65	0	0	['ast', 'ex', 'inh', 'mic', 'opc', 'oli']
1289	NELFE	incomplete-splice_match	2	6	1	0	2	33	0	0	44	0.0454545	0.136364	0.0227273	0	0.0454545	0.75	0	0	['ex', 'oli']
1306	HLA-DRB1	full-splice_match	10	0	3	143	1	4	0	2	163	0.0613497	0	0.0184049	0.877301	0.00613497	0.0245399	0	0.0122699	['ast', 'mic']
1309	PSMB9	full-splice_match	1	0	0	0	0	14	0	1	16	0.0625	0	0	0	0	0.875	0	0.0625	['ast', 'end', 'oli']
1312	BRD2	full-splice_match	6	27	13	0	5	54	0	0	105	0.0571429	0.257143	0.12381	0	0.047619	0.514286	0	0	['ast', 'ex', 'inh', 'oli']
1331	RING1	incomplete-splice_match	0	4	0	1	1	4	0	0	10	0	0.4	0	0.1	0.1	0.4	0	0	['ex', 'mic', 'opc', 'oli']
1334	RING1	incomplete-splice_match	16	41	18	0	3	27	0	0	105	0.152381	0.390476	0.171429	0	0.0285714	0.257143	0	0	['ast', 'ex', 'inh', 'oli']
1336	RPS18	full-splice_match	84	422	174	123	68	1286	1	16	2174	0.0386385	0.194112	0.0800368	0.0565777	0.0312787	0.591536	0.000459982	0.00735971	['ex', 'inh', 'mic', 'oli']
1337	RPS18	incomplete-splice_match	2	8	4	0	1	21	1	0	37	0.0540541	0.216216	0.108108	0	0.027027	0.567568	0.027027	0	['ast', 'ex', 'inh', 'oli']
1339	RPS18	incomplete-splice_match	4	8	4	7	2	27	0	1	53	0.0754717	0.150943	0.0754717	0.132075	0.0377358	0.509434	0	0.0188679	['ast', 'ex', 'inh', 'mic', 'oli']
1343	WDR46	incomplete-splice_match	1	21	4	0	0	2	0	0	28	0.0357143	0.75	0.142857	0	0	0.0714286	0	0	['ex', 'inh', 'oli']
1344	PFDN6	incomplete-splice_match	0	2	0	0	0	7	0	0	9	0	0.222222	0	0	0	0.777778	0	0	['ex', 'oli']
1349	PFDN6	full-splice_match	3	10	14	2	5	69	0	1	104	0.0288462	0.0961538	0.134615	0.0192308	0.0480769	0.663462	0	0.00961538	['ex', 'inh', 'oli']
1350	PFDN6	full-splice_match	1	4	1	2	0	5	0	1	14	0.0714286	0.285714	0.0714286	0.142857	0	0.357143	0	0.0714286	['ast', 'ex', 'end', 'inh', 'mic', 'oli']
1351	PFDN6	full-splice_match	1	1	8	1	0	26	0	1	38	0.0263158	0.0263158	0.210526	0.0263158	0	0.684211	0	0.0263158	['inh', 'oli']
1352	PFDN6	novel_not_in_catalog	0	3	3	0	1	12	0	1	20	0	0.15	0.15	0	0.05	0.6	0	0.05	['ex', 'end', 'inh', 'opc', 'oli']
1354	PFDN6	incomplete-splice_match	2	13	1	1	0	6	0	0	23	0.0869565	0.565217	0.0434783	0.0434783	0	0.26087	0	0	['ast', 'ex', 'oli']
1368	MOG	full-splice_match	0	0	0	0	0	61	0	0	61	0	0	0	0	0	1	0	0	['oli']
1369	MOG	novel_not_in_catalog	0	0	0	0	0	31	0	0	31	0	0	0	0	0	1	0	0	['oli']
1382	POLR1H	full-splice_match	2	1	2	0	0	6	0	0	11	0.181818	0.0909091	0.181818	0	0	0.545455	0	0	['ast', 'ex', 'inh', 'oli']
1383	POLR1H	full-splice_match	4	2	2	0	2	6	0	0	16	0.25	0.125	0.125	0	0.125	0.375	0	0	['ast', 'ex', 'inh', 'opc', 'oli']
1393	RPP21	full-splice_match	6	19	19	1	6	81	0	1	133	0.0451128	0.142857	0.142857	0.0075188	0.0451128	0.609023	0	0.0075188	['ex', 'inh', 'oli']
1399	RPP21	incomplete-splice_match	1	5	5	0	0	6	0	0	17	0.0588235	0.294118	0.294118	0	0	0.352941	0	0	['ast', 'ex', 'inh', 'oli']
1402	RPP21	full-splice_match	0	8	3	3	0	14	0	0	28	0	0.285714	0.107143	0.107143	0	0.5	0	0	['ex', 'inh', 'mic', 'oli']
1405	RPP21	full-splice_match	0	13	5	0	1	14	0	0	33	0	0.393939	0.151515	0	0.030303	0.424242	0	0	['ex', 'inh', 'oli']
1414	ABCF1	incomplete-splice_match	0	6	1	0	0	8	0	0	15	0	0.4	0.0666667	0	0	0.533333	0	0	['ex', 'inh', 'oli']
1417	ABCF1	incomplete-splice_match	1	11	4	1	2	15	0	0	34	0.0294118	0.323529	0.117647	0.0294118	0.0588235	0.441176	0	0	['ex', 'inh', 'opc', 'oli']
1419	MRPS18B	full-splice_match	3	4	4	4	1	87	0	1	104	0.0288462	0.0384615	0.0384615	0.0384615	0.00961538	0.836538	0	0.00961538	['oli']
1424	C6orf136	full-splice_match	4	27	11	0	0	16	0	0	58	0.0689655	0.465517	0.189655	0	0	0.275862	0	0	['ast', 'ex', 'inh', 'oli']
1431	TUBB	full-splice_match	5	6	17	12	8	83	1	0	132	0.0378788	0.0454545	0.128788	0.0909091	0.0606061	0.628788	0.00757576	0	['inh', 'mic', 'opc', 'oli']
1432	novelGene_IER3_AS	antisense	0	5	1	0	0	0	0	0	6	0	0.833333	0.166667	0	0	0	0	0	['ex', 'inh']
1437	NFKBIL1	full-splice_match	5	7	3	0	3	20	0	0	38	0.131579	0.184211	0.0789474	0	0.0789474	0.526316	0	0	['ast', 'ex', 'inh', 'opc', 'oli']
1441	AIF1	full-splice_match	1	0	0	48	1	0	0	3	53	0.0188679	0	0	0.90566	0.0188679	0	0	0.0566038	['end', 'mic']
1451	CSNK2B	full-splice_match	6	54	23	3	9	82	0	1	178	0.0337079	0.303371	0.129213	0.0168539	0.0505618	0.460674	0	0.00561798	['ex', 'inh', 'opc', 'oli']
1457	PSMB9	full-splice_match	0	0	0	1	2	18	0	0	21	0	0	0	0.047619	0.0952381	0.857143	0	0	['opc', 'oli']
1460	BRD2	incomplete-splice_match	1	23	3	0	1	6	1	0	35	0.0285714	0.657143	0.0857143	0	0.0285714	0.171429	0.0285714	0	['ex', 'inh', 'oli']
1477	SYNGAP1	incomplete-splice_match	3	10	7	0	2	0	0	0	22	0.136364	0.454545	0.318182	0	0.0909091	0	0	0	['ast', 'ex', 'inh', 'opc']
1490	STK19B	incomplete-splice_match	4	7	2	0	0	1	0	0	14	0.285714	0.5	0.142857	0	0	0.0714286	0	0	['ast', 'ex', 'inh', 'oli']
1507	ATP6V1G2	full-splice_match	1	164	53	1	2	26	0	1	248	0.00403226	0.66129	0.21371	0.00403226	0.00806452	0.104839	0	0.00403226	['ex', 'inh', 'oli']
1511	C6orf47	full-splice_match	1	8	6	2	2	28	0	0	47	0.0212766	0.170213	0.12766	0.0425532	0.0425532	0.595745	0	0	['ex', 'inh', 'oli']
1514	ABHD16A	incomplete-splice_match	4	19	5	1	0	21	0	0	50	0.08	0.38	0.1	0.02	0	0.42	0	0	['ast', 'ex', 'inh', 'oli']
1516	DDAH2	full-splice_match	2	0	1	1	1	5	0	0	10	0.2	0	0.1	0.1	0.1	0.5	0	0	['ast', 'inh', 'mic', 'opc', 'oli']
1526	PPP1R10	incomplete-splice_match	9	31	12	4	3	51	0	0	110	0.0818182	0.281818	0.109091	0.0363636	0.0272727	0.463636	0	0	['ast', 'ex', 'inh', 'oli']
1532	FLOT1	incomplete-splice_match	0	5	3	0	0	2	1	0	11	0	0.454545	0.272727	0	0	0.181818	0.0909091	0	['ex', 'inh', 'oli', 'per']
1536	FLOT1	full-splice_match	3	88	21	5	2	34	0	3	156	0.0192308	0.564103	0.134615	0.0320513	0.0128205	0.217949	0	0.0192308	['ex', 'inh', 'oli']
1538	FLOT1	incomplete-splice_match	2	14	4	1	1	6	0	0	28	0.0714286	0.5	0.142857	0.0357143	0.0357143	0.214286	0	0	['ast', 'ex', 'inh', 'oli']
1544	IER3	full-splice_match	0	3	2	8	0	1	0	0	14	0	0.214286	0.142857	0.571429	0	0.0714286	0	0	['ex', 'inh', 'mic', 'oli']
1545	IER3	full-splice_match	1	7	2	11	0	0	0	1	22	0.0454545	0.318182	0.0909091	0.5	0	0	0	0.0454545	['ex', 'inh', 'mic']
1550	NELFE	full-splice_match	1	3	0	1	2	30	0	0	37	0.027027	0.0810811	0	0.027027	0.0540541	0.810811	0	0	['ex', 'opc', 'oli']
1553	NELFE	incomplete-splice_match	7	6	2	1	3	51	0	1	71	0.0985915	0.084507	0.028169	0.0140845	0.0422535	0.71831	0	0.0140845	['ast', 'ex', 'oli']
1555	TNXA	incomplete-splice_match	5	7	3	0	0	0	3	1	19	0.263158	0.368421	0.157895	0	0	0	0.157895	0.0526316	['ast', 'ex', 'end', 'inh', 'per']
1562	PSMB8	full-splice_match	0	0	1	1	3	13	0	2	20	0	0	0.05	0.05	0.15	0.65	0	0.1	['end', 'inh', 'mic', 'opc', 'oli']
1567	HLA-DPA1	incomplete-splice_match	0	8	2	45	0	4	0	0	59	0	0.135593	0.0338983	0.762712	0	0.0677966	0	0	['ex', 'mic', 'oli']
1571	CUTA	full-splice_match	13	38	25	2	10	243	0	1	332	0.0391566	0.114458	0.0753012	0.0060241	0.0301205	0.731928	0	0.00301205	['ex', 'inh', 'oli']
1572	CUTA	novel_in_catalog	0	2	0	0	1	11	0	0	14	0	0.142857	0	0	0.0714286	0.785714	0	0	['ex', 'opc', 'oli']
1574	CUTA	novel_in_catalog	0	1	2	0	0	3	0	0	6	0	0.166667	0.333333	0	0	0.5	0	0	['ex', 'inh', 'oli']
1578	CUTA	full-splice_match	25	63	40	7	18	276	0	1	430	0.0581395	0.146512	0.0930233	0.0162791	0.0418605	0.64186	0	0.00232558	['ast', 'ex', 'inh', 'oli']
1586	CUTA	full-splice_match	11	54	52	7	17	428	0	0	569	0.0193322	0.0949033	0.0913884	0.0123023	0.029877	0.752197	0	0	['ex', 'inh', 'oli']
1592	CUTA	full-splice_match	15	110	40	9	19	217	1	1	412	0.0364078	0.26699	0.0970874	0.0218447	0.0461165	0.526699	0.00242718	0.00242718	['ex', 'inh', 'oli']
1597	CUTA	full-splice_match	0	4	0	0	0	3	0	0	7	0	0.571429	0	0	0	0.428571	0	0	['ex', 'oli']
1599	YTHDC1	incomplete-splice_match	9	41	22	8	2	23	0	0	105	0.0857143	0.390476	0.209524	0.0761905	0.0190476	0.219048	0	0	['ast', 'ex', 'inh', 'mic', 'oli']
1604	YTHDC1	incomplete-splice_match	4	3	1	1	0	18	0	1	28	0.142857	0.107143	0.0357143	0.0357143	0	0.642857	0	0.0357143	['ast', 'ex', 'oli']
1605	YTHDC1	incomplete-splice_match	9	30	13	5	2	56	0	3	118	0.0762712	0.254237	0.110169	0.0423729	0.0169492	0.474576	0	0.0254237	['ast', 'ex', 'inh', 'oli']
1606	YTHDC1	incomplete-splice_match	23	57	28	4	7	99	0	1	219	0.105023	0.260274	0.127854	0.0182648	0.0319635	0.452055	0	0.00456621	['ast', 'ex', 'inh', 'oli']
1609	ARL17B	incomplete-splice_match	2	5	2	2	2	9	0	0	22	0.0909091	0.227273	0.0909091	0.0909091	0.0909091	0.409091	0	0	['ast', 'ex', 'inh', 'mic', 'opc', 'oli']
1610	ARL17B	incomplete-splice_match	0	7	4	2	2	12	0	0	27	0	0.259259	0.148148	0.0740741	0.0740741	0.444444	0	0	['ex', 'inh', 'mic', 'opc', 'oli']
1611	ARL17B	incomplete-splice_match	1	3	4	0	1	2	0	0	11	0.0909091	0.272727	0.363636	0	0.0909091	0.181818	0	0	['ast', 'ex', 'inh', 'opc', 'oli']
1612	ARL17B	full-splice_match	0	2	1	1	0	10	0	0	14	0	0.142857	0.0714286	0.0714286	0	0.714286	0	0	['ex', 'inh', 'mic', 'oli']
1618	KANSL1	full-splice_match	12	20	17	4	4	42	0	0	99	0.121212	0.20202	0.171717	0.040404	0.040404	0.424242	0	0	['ast', 'ex', 'inh', 'oli']
1620	MAPT-AS1	full-splice_match	2	8	1	0	0	7	0	0	18	0.111111	0.444444	0.0555556	0	0	0.388889	0	0	['ast', 'ex', 'inh', 'oli']
1622	ENSG00000281487	novel_not_in_catalog	3	17	6	1	4	33	1	1	66	0.0454545	0.257576	0.0909091	0.0151515	0.0606061	0.5	0.0151515	0.0151515	['ex', 'inh', 'opc', 'oli']
1623	ENSG00000281487	novel_not_in_catalog	4	0	1	3	3	32	0	0	43	0.0930233	0	0.0232558	0.0697674	0.0697674	0.744186	0	0	['ast', 'mic', 'opc', 'oli']
1624	ENSG00000281487	full-splice_match	8	16	7	0	1	13	0	0	45	0.177778	0.355556	0.155556	0	0.0222222	0.288889	0	0	['ast', 'ex', 'inh', 'oli']
1627	ENSG00000275574	full-splice_match	1	5	0	0	0	3	0	0	9	0.111111	0.555556	0	0	0	0.333333	0	0	['ast', 'ex', 'oli']
1628	NSF	incomplete-splice_match	2	12	11	0	0	7	0	0	32	0.0625	0.375	0.34375	0	0	0.21875	0	0	['ast', 'ex', 'inh', 'oli']
1629	NSF	incomplete-splice_match	0	6	2	1	0	3	0	0	12	0	0.5	0.166667	0.0833333	0	0.25	0	0	['ex', 'inh', 'mic', 'oli']
1630	NSF	incomplete-splice_match	0	3	2	0	0	0	0	0	5	0	0.6	0.4	0	0	0	0	0	['ex', 'inh']
1633	NSF	incomplete-splice_match	0	11	5	0	1	2	0	0	19	0	0.578947	0.263158	0	0.0526316	0.105263	0	0	['ex', 'inh', 'opc', 'oli']
1635	NSF	incomplete-splice_match	1	8	3	3	0	6	0	0	21	0.047619	0.380952	0.142857	0.142857	0	0.285714	0	0	['ex', 'inh', 'mic', 'oli']
1646	NSFP1	incomplete-splice_match	1	18	9	0	0	6	0	0	34	0.0294118	0.529412	0.264706	0	0	0.176471	0	0	['ex', 'inh', 'oli']
1648	NSFP1	incomplete-splice_match	0	9	9	0	0	5	0	0	23	0	0.391304	0.391304	0	0	0.217391	0	0	['ex', 'inh', 'oli']
1649	NSFP1	incomplete-splice_match	0	8	1	0	0	5	0	0	14	0	0.571429	0.0714286	0	0	0.357143	0	0	['ex', 'inh', 'oli']
1650	LRRC37A	incomplete-splice_match	0	3	3	1	1	11	0	0	19	0	0.157895	0.157895	0.0526316	0.0526316	0.578947	0	0	['ex', 'inh', 'mic', 'opc', 'oli']
1652	PLEKHM1	incomplete-splice_match	4	5	2	1	1	14	0	0	27	0.148148	0.185185	0.0740741	0.037037	0.037037	0.518519	0	0	['ast', 'ex', 'inh', 'oli']
1661	KANSL1-AS1	full-splice_match	5	6	2	0	0	20	0	1	34	0.147059	0.176471	0.0588235	0	0	0.588235	0	0.0294118	['ast', 'ex', 'inh', 'oli']
1665	Metazoa_SRP	full-splice_match	1	26	12	1	4	19	0	0	63	0.015873	0.412698	0.190476	0.015873	0.0634921	0.301587	0	0	['ex', 'inh', 'opc', 'oli']
1671	MRPS36	incomplete-splice_match	2	2	0	1	0	8	0	0	13	0.153846	0.153846	0	0.0769231	0	0.615385	0	0	['ast', 'ex', 'mic', 'oli']
1675	CDK7	full-splice_match	1	8	2	0	1	7	0	0	19	0.0526316	0.421053	0.105263	0	0.0526316	0.368421	0	0	['ast', 'ex', 'inh', 'opc', 'oli']
1679	RAD17	incomplete-splice_match	2	3	2	0	0	9	0	0	16	0.125	0.1875	0.125	0	0	0.5625	0	0	['ast', 'ex', 'inh', 'oli']
1689	RAD17	incomplete-splice_match	1	4	4	0	0	9	0	1	19	0.0526316	0.210526	0.210526	0	0	0.473684	0	0.0526316	['ast', 'ex', 'end', 'inh', 'oli']
1690	RAD17	incomplete-splice_match	0	2	1	0	1	8	0	0	12	0	0.166667	0.0833333	0	0.0833333	0.666667	0	0	['ex', 'inh', 'opc', 'oli']
1706	GTF2H2	novel_in_catalog	2	9	0	1	1	2	0	0	15	0.133333	0.6	0	0.0666667	0.0666667	0.133333	0	0	['ast', 'ex', 'mic', 'opc', 'oli']
1707	GTF2H2	incomplete-splice_match	3	7	1	1	0	6	0	0	18	0.166667	0.388889	0.0555556	0.0555556	0	0.333333	0	0	['ast', 'ex', 'inh', 'mic', 'oli']
1712	ENSG00000290506	incomplete-splice_match	0	1	0	0	0	20	0	0	21	0	0.047619	0	0	0	0.952381	0	0	['oli']
1718	GTF2H2	incomplete-splice_match	2	3	5	0	0	5	0	0	15	0.133333	0.2	0.333333	0	0	0.333333	0	0	['ast', 'ex', 'inh', 'oli']
1733	SMN2	full-splice_match	7	25	4	1	0	16	0	0	53	0.132075	0.471698	0.0754717	0.0188679	0	0.301887	0	0	['ast', 'ex', 'inh', 'oli']
1737	SMN2	incomplete-splice_match	2	4	4	0	0	2	0	0	12	0.166667	0.333333	0.333333	0	0	0.166667	0	0	['ast', 'ex', 'inh', 'oli']
1742	SMN2	incomplete-splice_match	0	4	5	0	0	6	0	0	15	0	0.266667	0.333333	0	0	0.4	0	0	['ex', 'inh', 'oli']
1743	SMN2	incomplete-splice_match	10	52	6	1	4	20	0	0	93	0.107527	0.55914	0.0645161	0.0107527	0.0430108	0.215054	0	0	['ast', 'ex', 'inh', 'oli']
1748	SERF1B	full-splice_match	13	34	20	0	12	82	0	1	162	0.0802469	0.209877	0.123457	0	0.0740741	0.506173	0	0.00617284	['ast', 'ex', 'inh', 'opc', 'oli']
1749	SERF1B	full-splice_match	2	11	5	0	3	6	0	0	27	0.0740741	0.407407	0.185185	0	0.111111	0.222222	0	0	['ast', 'ex', 'inh', 'opc', 'oli']
1751	SERF1B	incomplete-splice_match	1	26	11	1	2	27	0	1	69	0.0144928	0.376812	0.15942	0.0144928	0.0289855	0.391304	0	0.0144928	['ex', 'inh', 'oli']
1753	SERF1B	incomplete-splice_match	1	23	3	1	2	4	0	0	34	0.0294118	0.676471	0.0882353	0.0294118	0.0588235	0.117647	0	0	['ex', 'inh', 'opc', 'oli']
1754	ENSG00000275311	full-splice_match	34	20	17	1	4	169	0	1	246	0.138211	0.0813008	0.0691057	0.00406504	0.0162602	0.686992	0	0.00406504	['ast', 'ex', 'inh', 'oli']
1755	ENSG00000277036	full-splice_match	1	2	2	0	3	89	0	0	97	0.0103093	0.0206186	0.0206186	0	0.0309278	0.917526	0	0	['oli']
1756	ENSG00000273847	full-splice_match	13	3	8	2	6	196	0	0	228	0.0570175	0.0131579	0.0350877	0.00877193	0.0263158	0.859649	0	0	['ast', 'oli']
1758	CCDC125	incomplete-splice_match	1	0	3	1	0	6	0	0	11	0.0909091	0	0.272727	0.0909091	0	0.545455	0	0	['ast', 'inh', 'mic', 'oli']
1760	ENSG00000275825	full-splice_match	4	4	3	0	1	46	0	0	58	0.0689655	0.0689655	0.0517241	0	0.0172414	0.793103	0	0	['ast', 'ex', 'inh', 'oli']
1761	ENSG00000275536	full-splice_match	4	4	1	1	1	54	0	0	65	0.0615385	0.0615385	0.0153846	0.0153846	0.0153846	0.830769	0	0	['ast', 'ex', 'oli']
1765	AK6	full-splice_match	16	47	20	4	9	142	0	2	240	0.0666667	0.195833	0.0833333	0.0166667	0.0375	0.591667	0	0.00833333	['ast', 'ex', 'inh', 'oli']
1771	AK6	full-splice_match	0	4	3	1	2	5	0	0	15	0	0.266667	0.2	0.0666667	0.133333	0.333333	0	0	['ex', 'inh', 'mic', 'opc', 'oli']
1774	GTF2H2C_2	incomplete-splice_match	2	5	5	2	0	9	0	0	23	0.0869565	0.217391	0.217391	0.0869565	0	0.391304	0	0	['ast', 'ex', 'inh', 'mic', 'oli']
1776	GTF2H2C_2	incomplete-splice_match	3	7	1	0	0	6	0	0	17	0.176471	0.411765	0.0588235	0	0	0.352941	0	0	['ast', 'ex', 'inh', 'oli']
1780	GTF2H2C_2	full-splice_match	1	1	5	1	4	9	0	0	21	0.047619	0.047619	0.238095	0.047619	0.190476	0.428571	0	0	['inh', 'opc', 'oli']
1789	TAF9	full-splice_match	11	112	43	4	8	97	0	1	276	0.0398551	0.405797	0.155797	0.0144928	0.0289855	0.351449	0	0.00362319	['ex', 'inh', 'oli']
1796	TAF9	incomplete-splice_match	0	3	1	1	1	7	0	0	13	0	0.230769	0.0769231	0.0769231	0.0769231	0.538462	0	0	['ex', 'inh', 'mic', 'opc', 'oli']
1799	INTS3	incomplete-splice_match	2	14	1	2	1	5	0	0	25	0.08	0.56	0.04	0.08	0.04	0.2	0	0	['ast', 'ex', 'mic', 'oli']
1803	SLC27A3	novel_in_catalog	9	42	14	1	0	3	0	0	69	0.130435	0.608696	0.202899	0.0144928	0	0.0434783	0	0	['ast', 'ex', 'inh']
1810	ENSG00000261905	incomplete-splice_match	8	7	6	1	1	25	0	0	48	0.166667	0.145833	0.125	0.0208333	0.0208333	0.520833	0	0	['ast', 'ex', 'inh', 'oli']
1818	ENTREP3	incomplete-splice_match	15	21	16	2	5	41	0	0	100	0.15	0.21	0.16	0.02	0.05	0.41	0	0	['ast', 'ex', 'inh', 'opc', 'oli']
1830	SCAMP3	full-splice_match	11	44	35	4	5	121	0	0	220	0.05	0.2	0.159091	0.0181818	0.0227273	0.55	0	0	['ast', 'ex', 'inh', 'oli']
1834	CLK2	incomplete-splice_match	15	33	15	2	4	16	1	1	87	0.172414	0.37931	0.172414	0.0229885	0.045977	0.183908	0.0114943	0.0114943	['ast', 'ex', 'inh', 'oli']
1839	HCN3	incomplete-splice_match	3	41	35	0	2	2	0	1	84	0.0357143	0.488095	0.416667	0	0.0238095	0.0238095	0	0.0119048	['ex', 'inh']
1842	PTPRC	full-splice_match	1	0	0	63	0	2	0	2	68	0.0147059	0	0	0.926471	0	0.0294118	0	0.0294118	['mic']
1844	PTPRC	incomplete-splice_match	0	0	1	39	0	0	0	1	41	0	0	0.0243902	0.95122	0	0	0	0.0243902	['mic']
1845	CRIM1-DT	novel_not_in_catalog	10	55	17	2	3	6	0	1	94	0.106383	0.585106	0.180851	0.0212766	0.0319149	0.0638298	0	0.0106383	['ast', 'ex', 'inh', 'oli']
1846	CRIM1-DT	full-splice_match	8	54	7	1	1	6	0	0	77	0.103896	0.701299	0.0909091	0.012987	0.012987	0.0779221	0	0	['ast', 'ex', 'inh', 'oli']
1854	ENSG00000273741	full-splice_match	0	6	0	0	0	27	0	0	33	0	0.181818	0	0	0	0.818182	0	0	['ex', 'oli']
1857	DENND11	incomplete-splice_match	1	9	0	0	0	4	0	0	14	0.0714286	0.642857	0	0	0	0.285714	0	0	['ast', 'ex', 'oli']
1859	SSBP1	incomplete-splice_match	2	1	3	0	0	2	0	0	8	0.25	0.125	0.375	0	0	0.25	0	0	['ast', 'ex', 'inh', 'oli']
1860	SSBP1	full-splice_match	2	3	0	1	1	3	0	0	10	0.2	0.3	0	0.1	0.1	0.3	0	0	['ast', 'ex', 'mic', 'opc', 'oli']
1862	SSBP1	full-splice_match	12	15	7	6	6	57	0	0	103	0.116505	0.145631	0.0679612	0.0582524	0.0582524	0.553398	0	0	['ast', 'ex', 'inh', 'mic', 'opc', 'oli']
1866	SSBP1	full-splice_match	4	0	5	1	2	17	0	0	29	0.137931	0	0.172414	0.0344828	0.0689655	0.586207	0	0	['ast', 'inh', 'opc', 'oli']
1870	SSBP1	full-splice_match	6	12	7	3	11	85	0	0	124	0.0483871	0.0967742	0.0564516	0.0241935	0.0887097	0.685484	0	0	['ex', 'inh', 'opc', 'oli']
1871	SSBP1	incomplete-splice_match	3	15	7	3	1	16	0	0	45	0.0666667	0.333333	0.155556	0.0666667	0.0222222	0.355556	0	0	['ast', 'ex', 'inh', 'mic', 'oli']
1874	APBA1	full-splice_match	1	15	3	0	5	23	0	0	47	0.0212766	0.319149	0.0638298	0	0.106383	0.489362	0	0	['ex', 'inh', 'opc', 'oli']
1878	ATP23	full-splice_match	0	2	2	0	1	3	0	0	8	0	0.25	0.25	0	0.125	0.375	0	0	['ex', 'inh', 'opc', 'oli']
1879	GIHCG	full-splice_match	11	20	5	1	2	8	0	0	47	0.234043	0.425532	0.106383	0.0212766	0.0425532	0.170213	0	0	['ast', 'ex', 'inh', 'oli']
1880	GIHCG	full-splice_match	2	12	4	0	1	9	0	0	28	0.0714286	0.428571	0.142857	0	0.0357143	0.321429	0	0	['ast', 'ex', 'inh', 'oli']
1887	ENSG00000290583	full-splice_match	3	7	0	2	0	13	0	0	25	0.12	0.28	0	0.08	0	0.52	0	0	['ast', 'ex', 'mic', 'oli']
1893	RPH3AL-AS1	full-splice_match	0	2	0	0	0	2	0	0	4	0	0.5	0	0	0	0.5	0	0	['ex', 'oli']
1901	ENSG00000263322	full-splice_match	1	5	8	0	13	30	0	0	57	0.0175439	0.0877193	0.140351	0	0.22807	0.526316	0	0	['ex', 'inh', 'opc', 'oli']
1903	DSEL	full-splice_match	5	17	14	1	14	167	0	0	218	0.0229358	0.0779817	0.0642202	0.00458716	0.0642202	0.766055	0	0	['ex', 'inh', 'opc', 'oli']
1905	ZNF66	incomplete-splice_match	0	9	4	0	1	11	0	0	25	0	0.36	0.16	0	0.04	0.44	0	0	['ex', 'inh', 'oli']
1908	ZNF85	full-splice_match	0	2	1	0	2	7	0	0	12	0	0.166667	0.0833333	0	0.166667	0.583333	0	0	['ex', 'inh', 'opc', 'oli']
1917	LSM14A	incomplete-splice_match	0	3	1	0	1	6	0	0	11	0	0.272727	0.0909091	0	0.0909091	0.545455	0	0	['ex', 'inh', 'opc', 'oli']
1919	LSM14A	incomplete-splice_match	1	1	2	0	0	7	0	0	11	0.0909091	0.0909091	0.181818	0	0	0.636364	0	0	['ast', 'ex', 'inh', 'oli']
1923	LSM14A	incomplete-splice_match	0	4	4	2	0	12	0	0	22	0	0.181818	0.181818	0.0909091	0	0.545455	0	0	['ex', 'inh', 'mic', 'oli']
1924	LSM14A	incomplete-splice_match	3	9	9	1	2	46	0	0	70	0.0428571	0.128571	0.128571	0.0142857	0.0285714	0.657143	0	0	['ex', 'inh', 'oli']
1930	GARRE1	full-splice_match	18	66	31	12	7	288	0	1	423	0.0425532	0.156028	0.0732861	0.0283688	0.0165485	0.680851	0	0.00236407	['ex', 'inh', 'oli']
1936	ZNF100	full-splice_match	3	2	1	1	0	10	0	0	17	0.176471	0.117647	0.0588235	0.0588235	0	0.588235	0	0	['ast', 'ex', 'inh', 'mic', 'oli']
1940	ZNF43	full-splice_match	10	25	19	3	7	26	0	1	91	0.10989	0.274725	0.208791	0.032967	0.0769231	0.285714	0	0.010989	['ast', 'ex', 'inh', 'opc', 'oli']
1945	PAXBP1	full-splice_match	10	4	5	1	11	47	0	0	78	0.128205	0.0512821	0.0641026	0.0128205	0.141026	0.602564	0	0	['ast', 'ex', 'inh', 'opc', 'oli']
1948	IFNGR2	full-splice_match	10	128	92	32	12	23	0	0	297	0.03367	0.430976	0.309764	0.107744	0.040404	0.0774411	0	0	['ex', 'inh', 'mic', 'oli']
1951	TMEM50B	novel_in_catalog	3	12	2	1	1	10	0	0	29	0.103448	0.413793	0.0689655	0.0344828	0.0344828	0.344828	0	0	['ast', 'ex', 'inh', 'oli']
1953	TMEM50B	full-splice_match	16	33	35	3	11	68	0	3	169	0.0946746	0.195266	0.207101	0.0177515	0.0650888	0.402367	0	0.0177515	['ast', 'ex', 'inh', 'opc', 'oli']
1958	TMEM50B	incomplete-splice_match	3	2	5	0	1	6	0	0	17	0.176471	0.117647	0.294118	0	0.0588235	0.352941	0	0	['ast', 'ex', 'inh', 'opc', 'oli']
1959	TMEM50B	incomplete-splice_match	0	3	3	2	0	7	0	0	15	0	0.2	0.2	0.133333	0	0.466667	0	0	['ex', 'inh', 'mic', 'oli']
1960	TMEM50B	full-splice_match	3	14	12	1	1	7	0	0	38	0.0789474	0.368421	0.315789	0.0263158	0.0263158	0.184211	0	0	['ast', 'ex', 'inh', 'oli']
1961	TMEM50B	incomplete-splice_match	3	0	8	1	0	17	0	1	30	0.1	0	0.266667	0.0333333	0	0.566667	0	0.0333333	['ast', 'inh', 'oli']
1964	DNAJC28	full-splice_match	1	4	0	0	1	10	0	0	16	0.0625	0.25	0	0	0.0625	0.625	0	0	['ast', 'ex', 'opc', 'oli']
1967	GART	incomplete-splice_match	2	2	3	0	1	6	0	0	14	0.142857	0.142857	0.214286	0	0.0714286	0.428571	0	0	['ast', 'ex', 'inh', 'opc', 'oli']
1971	SMDT1	full-splice_match	17	156	64	14	15	188	0	0	454	0.0374449	0.343612	0.140969	0.030837	0.0330396	0.414097	0	0	['ex', 'inh', 'oli']
1976	SMDT1	novel_not_in_catalog	0	2	2	0	0	10	0	0	14	0	0.142857	0.142857	0	0	0.714286	0	0	['ex', 'inh', 'oli']
1977	SMDT1	full-splice_match	2	15	7	0	4	22	0	0	50	0.04	0.3	0.14	0	0.08	0.44	0	0	['ex', 'inh', 'opc', 'oli']
1978	NDUFA6	full-splice_match	24	38	12	7	6	68	2	1	158	0.151899	0.240506	0.0759494	0.0443038	0.0379747	0.43038	0.0126582	0.00632911	['ast', 'ex', 'inh', 'oli']
1981	OLA1P1	full-splice_match	0	4	1	0	0	4	0	0	9	0	0.444444	0.111111	0	0	0.444444	0	0	['ex', 'inh', 'oli']
1983	CYP2D7	incomplete-splice_match	2	7	1	0	2	4	0	0	16	0.125	0.4375	0.0625	0	0.125	0.25	0	0	['ast', 'ex', 'inh', 'opc', 'oli']
1988	KIF5C	incomplete-splice_match	6	48	16	0	5	60	0	0	135	0.0444444	0.355556	0.118519	0	0.037037	0.444444	0	0	['ex', 'inh', 'oli']
1996	WASH8P	incomplete-splice_match	0	1	5	1	1	1	0	0	9	0	0.111111	0.555556	0.111111	0.111111	0.111111	0	0	['ex', 'inh', 'mic', 'opc', 'oli']
1999	WASH8P	incomplete-splice_match	5	130	36	5	2	26	0	0	204	0.0245098	0.637255	0.176471	0.0245098	0.00980392	0.127451	0	0	['ex', 'inh', 'oli']
2001	WASH8P	novel_not_in_catalog	0	3	1	0	0	3	0	0	7	0	0.428571	0.142857	0	0	0.428571	0	0	['ex', 'inh', 'oli']
2005	ENSG00000282676	full-splice_match	1	63	38	0	0	2	0	0	104	0.00961538	0.605769	0.365385	0	0	0.0192308	0	0	['ex', 'inh']
2008	SMIM10L1	full-splice_match	3	19	5	1	4	38	0	0	70	0.0428571	0.271429	0.0714286	0.0142857	0.0571429	0.542857	0	0	['ex', 'inh', 'opc', 'oli']
2012	TAS2R14	full-splice_match	2	13	3	0	0	34	0	0	52	0.0384615	0.25	0.0576923	0	0	0.653846	0	0	['ex', 'inh', 'oli']
2017	TAS2R15P	full-splice_match	1	16	10	1	2	21	0	0	51	0.0196078	0.313725	0.196078	0.0196078	0.0392157	0.411765	0	0	['ex', 'inh', 'oli']
2018	PRR4	incomplete-splice_match	2	7	4	0	1	18	0	0	32	0.0625	0.21875	0.125	0	0.03125	0.5625	0	0	['ast', 'ex', 'inh', 'oli']
2019	PRR4	novel_not_in_catalog	4	2	4	1	2	25	0	0	38	0.105263	0.0526316	0.105263	0.0263158	0.0526316	0.657895	0	0	['ast', 'ex', 'inh', 'opc', 'oli']
2021	TAS2R20	full-splice_match	1	3	3	0	1	11	0	0	19	0.0526316	0.157895	0.157895	0	0.0526316	0.578947	0	0	['ast', 'ex', 'inh', 'opc', 'oli']
2029	TAS2R30	full-splice_match	3	4	4	0	0	13	0	0	24	0.125	0.166667	0.166667	0	0	0.541667	0	0	['ast', 'ex', 'inh', 'oli']
2032	ENSG00000272751	full-splice_match	1	10	5	0	1	14	0	0	31	0.0322581	0.322581	0.16129	0	0.0322581	0.451613	0	0	['ex', 'inh', 'oli']
2035	NDUFA3	full-splice_match	49	153	95	13	31	572	0	2	915	0.0535519	0.167213	0.103825	0.0142077	0.0338798	0.625137	0	0.00218579	['ast', 'ex', 'inh', 'oli']
2049	TFPT	full-splice_match	1	5	1	2	0	7	0	0	16	0.0625	0.3125	0.0625	0.125	0	0.4375	0	0	['ast', 'ex', 'inh', 'mic', 'oli']
2055	CNOT3	incomplete-splice_match	3	9	1	0	1	3	0	0	17	0.176471	0.529412	0.0588235	0	0.0588235	0.176471	0	0	['ast', 'ex', 'inh', 'opc', 'oli']
2056	CNOT3	incomplete-splice_match	2	5	1	1	1	7	0	0	17	0.117647	0.294118	0.0588235	0.0588235	0.0588235	0.411765	0	0	['ast', 'ex', 'inh', 'mic', 'opc', 'oli']
2057	LENG1	full-splice_match	1	1	2	0	1	24	0	0	29	0.0344828	0.0344828	0.0689655	0	0.0344828	0.827586	0	0	['inh', 'oli']
2059	TSEN34	full-splice_match	1	7	3	1	2	13	0	0	27	0.037037	0.259259	0.111111	0.037037	0.0740741	0.481481	0	0	['ex', 'inh', 'opc', 'oli']
2060	TSEN34	full-splice_match	2	0	5	0	4	12	0	0	23	0.0869565	0	0.217391	0	0.173913	0.521739	0	0	['ast', 'inh', 'opc', 'oli']
2061	RPS9	full-splice_match	6	10	4	12	6	100	0	0	138	0.0434783	0.0724638	0.0289855	0.0869565	0.0434783	0.724638	0	0	['ex', 'mic', 'oli']
2064	TTYH1	full-splice_match	24	1	1	1	10	113	0	0	150	0.16	0.00666667	0.00666667	0.00666667	0.0666667	0.753333	0	0	['ast', 'opc', 'oli']
2080	TTYH1	full-splice_match	85	4	2	0	11	246	0	0	348	0.244253	0.0114943	0.00574713	0	0.0316092	0.706897	0	0	['ast', 'oli']
2082	TTYH1	full-splice_match	10	16	2	0	0	9	0	0	37	0.27027	0.432432	0.0540541	0	0	0.243243	0	0	['ast', 'ex', 'inh', 'oli']
2097	LENG9	full-splice_match	1	5	1	1	2	15	0	1	26	0.0384615	0.192308	0.0384615	0.0384615	0.0769231	0.576923	0	0.0384615	['ex', 'opc', 'oli']
2100	NDUFA3	full-splice_match	14	68	31	9	8	190	0	1	321	0.0436137	0.211838	0.0965732	0.0280374	0.0249221	0.5919	0	0.00311526	['ex', 'inh', 'oli']
2108	TFPT	full-splice_match	2	2	3	0	0	5	0	0	12	0.166667	0.166667	0.25	0	0	0.416667	0	0	['ast', 'ex', 'inh', 'oli']
2110	PRPF31	full-splice_match	0	0	0	0	1	11	0	0	12	0	0	0	0	0.0833333	0.916667	0	0	['opc', 'oli']
2115	LENG1	full-splice_match	1	1	1	0	2	16	0	0	21	0.047619	0.047619	0.047619	0	0.0952381	0.761905	0	0	['opc', 'oli']
2117	RPS9	full-splice_match	42	121	54	55	18	456	1	5	752	0.0558511	0.160904	0.0718085	0.0731383	0.0239362	0.606383	0.00132979	0.00664894	['ast', 'ex', 'inh', 'mic', 'oli']
2128	NDUFA3	full-splice_match	23	101	40	7	16	243	0	3	433	0.0531178	0.233256	0.0923788	0.0161663	0.0369515	0.561201	0	0.00692841	['ast', 'ex', 'inh', 'oli']
2138	TFPT	full-splice_match	0	3	3	1	1	7	0	0	15	0	0.2	0.2	0.0666667	0.0666667	0.466667	0	0	['ex', 'inh', 'mic', 'opc', 'oli']
2142	LENG1	full-splice_match	1	4	1	1	1	11	0	0	19	0.0526316	0.210526	0.0526316	0.0526316	0.0526316	0.578947	0	0	['ast', 'ex', 'inh', 'mic', 'opc', 'oli']
2144	MBOAT7	incomplete-splice_match	11	7	9	3	3	39	0	1	73	0.150685	0.0958904	0.123288	0.0410959	0.0410959	0.534247	0	0.0136986	['ast', 'ex', 'inh', 'oli']
2146	RPS9	full-splice_match	18	80	32	19	16	329	0	4	498	0.0361446	0.160643	0.064257	0.0381526	0.0321285	0.660643	0	0.00803213	['ex', 'inh', 'oli']
2150	RPS9	novel_in_catalog	2	7	1	0	0	12	0	0	22	0.0909091	0.318182	0.0454545	0	0	0.545455	0	0	['ast', 'ex', 'oli']
2152	RPS9	novel_not_in_catalog	0	1	4	1	0	3	0	1	10	0	0.1	0.4	0.1	0	0.3	0	0.1	['ex', 'end', 'inh', 'mic', 'oli']
2154	RPS9	incomplete-splice_match	0	5	1	0	2	10	0	1	19	0	0.263158	0.0526316	0	0.105263	0.526316	0	0.0526316	['ex', 'end', 'inh', 'opc', 'oli']
2158	NDUFA3	full-splice_match	29	96	53	10	19	360	0	1	568	0.0510563	0.169014	0.0933099	0.0176056	0.0334507	0.633803	0	0.00176056	['ast', 'ex', 'inh', 'oli']
2169	TFPT	full-splice_match	0	2	1	0	1	5	0	0	9	0	0.222222	0.111111	0	0.111111	0.555556	0	0	['ex', 'inh', 'opc', 'oli']
2175	LENG1	full-splice_match	0	1	1	1	1	26	0	0	30	0	0.0333333	0.0333333	0.0333333	0.0333333	0.866667	0	0	['oli']
2178	RPS9	full-splice_match	19	54	44	31	22	441	0	4	615	0.0308943	0.0878049	0.0715447	0.0504065	0.0357724	0.717073	0	0.00650407	['ex', 'inh', 'mic', 'oli']
2189	NDUFA3	full-splice_match	73	228	113	36	48	1009	2	7	1516	0.048153	0.150396	0.0745383	0.0237467	0.0316623	0.665567	0.00131926	0.00461741	['ex', 'inh', 'oli']
2199	TFPT	full-splice_match	0	3	2	1	0	2	0	0	8	0	0.375	0.25	0.125	0	0.25	0	0	['ex', 'inh', 'mic', 'oli']
2200	PRPF31	full-splice_match	1	10	2	2	3	12	0	1	31	0.0322581	0.322581	0.0645161	0.0645161	0.0967742	0.387097	0	0.0322581	['ex', 'inh', 'mic', 'opc', 'oli']
2205	LENG1	full-splice_match	0	1	1	1	1	8	0	0	12	0	0.0833333	0.0833333	0.0833333	0.0833333	0.666667	0	0	['ex', 'inh', 'mic', 'opc', 'oli']
2207	RPS9	full-splice_match	8	16	19	19	11	228	0	4	305	0.0262295	0.052459	0.0622951	0.0622951	0.0360656	0.747541	0	0.0131148	['ex', 'inh', 'mic', 'oli']
2210	RPS9	incomplete-splice_match	0	29	8	1	1	13	0	0	52	0	0.557692	0.153846	0.0192308	0.0192308	0.25	0	0	['ex', 'inh', 'oli']
2218	NDUFA3	full-splice_match	34	96	69	19	17	408	0	1	644	0.052795	0.149068	0.107143	0.0295031	0.0263975	0.63354	0	0.0015528	['ast', 'ex', 'inh', 'oli']
2222	NDUFA3	novel_not_in_catalog	0	0	1	0	1	15	0	0	17	0	0	0.0588235	0	0.0588235	0.882353	0	0	['inh', 'opc', 'oli']
2226	TFPT	full-splice_match	1	4	3	2	1	5	0	0	16	0.0625	0.25	0.1875	0.125	0.0625	0.3125	0	0	['ast', 'ex', 'inh', 'mic', 'opc', 'oli']
2228	PRPF31	full-splice_match	2	8	4	0	0	11	0	0	25	0.08	0.32	0.16	0	0	0.44	0	0	['ast', 'ex', 'inh', 'oli']
2234	LENG1	full-splice_match	2	7	2	2	2	34	0	0	49	0.0408163	0.142857	0.0408163	0.0408163	0.0408163	0.693878	0	0	['ex', 'oli']
2237	RPS9	full-splice_match	18	47	29	31	19	265	1	1	411	0.0437956	0.114355	0.0705596	0.0754258	0.0462287	0.644769	0.00243309	0.00243309	['ex', 'inh', 'mic', 'oli']
2241	RPS9	novel_not_in_catalog	2	4	4	0	0	15	0	1	26	0.0769231	0.153846	0.153846	0	0	0.576923	0	0.0384615	['ast', 'ex', 'inh', 'oli']
2244	NDUFA3	full-splice_match	36	182	70	17	24	407	0	2	738	0.0487805	0.246612	0.0948509	0.0230352	0.0325203	0.551491	0	0.00271003	['ex', 'inh', 'oli']
2252	TFPT	full-splice_match	1	1	3	3	0	6	0	0	14	0.0714286	0.0714286	0.214286	0.214286	0	0.428571	0	0	['ast', 'ex', 'inh', 'mic', 'oli']
2266	TSEN34	full-splice_match	0	1	4	1	2	8	0	0	16	0	0.0625	0.25	0.0625	0.125	0.5	0	0	['ex', 'inh', 'mic', 'opc', 'oli']
2267	RPS9	full-splice_match	17	108	20	27	11	353	0	6	542	0.0313653	0.199262	0.0369004	0.0498155	0.0202952	0.651292	0	0.0110701	['ex', 'oli']
2275	RPS9	full-splice_match	10	7	8	6	5	47	0	0	83	0.120482	0.0843373	0.0963855	0.0722892	0.060241	0.566265	0	0	['ast', 'ex', 'inh', 'mic', 'opc', 'oli']
2276	RPS9	full-splice_match	2	5	10	9	1	35	0	0	62	0.0322581	0.0806452	0.16129	0.145161	0.016129	0.564516	0	0	['ex', 'inh', 'mic', 'oli']
2278	TTYH1	full-splice_match	188	113	1	2	39	298	0	0	641	0.293292	0.176287	0.00156006	0.00312012	0.0608424	0.464899	0	0	['ast', 'ex', 'opc', 'oli']
2284	TTYH1	full-splice_match	14	6	1	0	7	129	0	0	157	0.089172	0.0382166	0.00636943	0	0.044586	0.821656	0	0	['ast', 'oli']
2293	TTYH1	incomplete-splice_match	2	0	0	0	1	10	0	0	13	0.153846	0	0	0	0.0769231	0.769231	0	0	['ast', 'opc', 'oli']
2304	LENG9	full-splice_match	11	16	4	0	0	9	0	0	40	0.275	0.4	0.1	0	0	0.225	0	0	['ast', 'ex', 'inh', 'oli']
2310	NDUFA3	full-splice_match	24	93	40	8	12	211	1	1	390	0.0615385	0.238462	0.102564	0.0205128	0.0307692	0.541026	0.0025641	0.0025641	['ast', 'ex', 'inh', 'oli']
2318	TFPT	full-splice_match	1	0	2	0	0	4	0	0	7	0.142857	0	0.285714	0	0	0.571429	0	0	['ast', 'inh', 'oli']
2325	CNOT3	incomplete-splice_match	5	4	5	0	3	12	0	0	29	0.172414	0.137931	0.172414	0	0.103448	0.413793	0	0	['ast', 'ex', 'inh', 'opc', 'oli']
2326	LENG1	full-splice_match	2	11	6	0	1	41	0	0	61	0.0327869	0.180328	0.0983607	0	0.0163934	0.672131	0	0	['ex', 'inh', 'oli']
2330	RPS9	full-splice_match	34	100	43	34	26	628	0	10	875	0.0388571	0.114286	0.0491429	0.0388571	0.0297143	0.717714	0	0.0114286	['ex', 'oli']
[truncated: 53,038 more rows]
