# Supplementary material for: RNA isoform diversity, splicing variants, and switching in single cells of the Alzheimer’s disease brain
Source: Research Square preprint supplement (doi:10.21203/rs.3.rs-7436496/v1), 2025-09-29
Supplement: Supplementary file 7 [file c04e5a7c3fa366d4a9a96c51.xlsx]

## Sheet: README
Supplementary Table 7
DEXseq output from analyzing transcript switching in pseudobulk confident isoforms

## Sheet: DEXSeq_sigSwitches
groupID	featureID	exonBaseMean	dispersion	stat	pvalue	padj	AD	ND	log2fold_ND_AD	genomicData	countData.1	countData.2	countData.3	countData.4	countData.5	countData.6	countData.7	countData.8	countData.9	countData.10	countData.11	countData.12	countData.13	countData.14	countData.15
FUBP1:tx12515	FUBP1	tx12515	4.06981	0.313714	23.7339	1.10614e-06	0.032841	0.90407	0.200505	-3.58029	new("GRanges", seqnames = new("Rle", values = integer(0), lengths = integer(0), elementMetadata = NULL, metadata = list()), ranges = new("IRanges", start = integer(0), width = integer(0), NAMES = NULL, elementType = "ANY", elementMetadata = NULL, metadata = list()), strand = new("Rle", values = integer(0), lengths = integer(0), elementMetadata = NULL, metadata = list()), seqinfo = new("Seqinfo", …
rownames = NULL, nrows = 0, listData = list(), elementType = "ANY", elementMetadata = NULL, metadata = list()), elementType = "ANY", metadata = list())	3	28	1	25	3	0	0	2	7	0	9	1	0	5	0
SLC4A8:tx41420	SLC4A8	tx41420	6.85332	0.488179	21.4857	3.56472e-06	0.032841	0.342138	1.15039	3.4544	new("GRanges", seqnames = new("Rle", values = integer(0), lengths = integer(0), elementMetadata = NULL, metadata = list()), ranges = new("IRanges", start = integer(0), width = integer(0), NAMES = NULL, elementType = "ANY", elementMetadata = NULL, metadata = list()), strand = new("Rle", values = integer(0), lengths = integer(0), elementMetadata = NULL, metadata = list()), seqinfo = new("Seqinfo", …
rownames = NULL, nrows = 0, listData = list(), elementType = "ANY", elementMetadata = NULL, metadata = list()), elementType = "ANY", metadata = list())	36	6	53	0	0	13	2	0	0	13	0	2	0	6	16
TRIM9:tx53838	TRIM9	tx53838	1.32169	0.315319	20.1826	7.03912e-06	0.0468503	0.043316	0.57868	4.73361	new("GRanges", seqnames = new("Rle", values = integer(0), lengths = integer(0), elementMetadata = NULL, metadata = list()), ranges = new("IRanges", start = integer(0), width = integer(0), NAMES = NULL, elementType = "ANY", elementMetadata = NULL, metadata = list()), strand = new("Rle", values = integer(0), lengths = integer(0), elementMetadata = NULL, metadata = list()), seqinfo = new("Seqinfo", …
rownames = NULL, nrows = 0, listData = list(), elementType = "ANY", elementMetadata = NULL, metadata = list()), elementType = "ANY", metadata = list())	10	1	9	0	0	0	2	0	0	0	0	6	0	0	0
SEPTIN4:tx73137	SEPTIN4	tx73137	125.183	0.992823	19.9091	8.12119e-06	0.0468503	1.28237	2.44348	3.92926	new("GRanges", seqnames = new("Rle", values = integer(0), lengths = integer(0), elementMetadata = NULL, metadata = list()), ranges = new("IRanges", start = integer(0), width = integer(0), NAMES = NULL, elementType = "ANY", elementMetadata = NULL, metadata = list()), strand = new("Rle", values = integer(0), lengths = integer(0), elementMetadata = NULL, metadata = list()), seqinfo = new("Seqinfo", …
rownames = NULL, nrows = 0, listData = list(), elementType = "ANY", elementMetadata = NULL, metadata = list()), elementType = "ANY", metadata = list())	1720	187	166	29	4	44	22	0	17	4	4	36	1	34	802
BCL2L1:tx101671	BCL2L1	tx101671	1.53441	0.488007	22.2328	2.41512e-06	0.032841	0.19299	0.619091	2.49766	new("GRanges", seqnames = new("Rle", values = integer(0), lengths = integer(0), elementMetadata = NULL, metadata = list()), ranges = new("IRanges", start = integer(0), width = integer(0), NAMES = NULL, elementType = "ANY", elementMetadata = NULL, metadata = list()), strand = new("Rle", values = integer(0), lengths = integer(0), elementMetadata = NULL, metadata = list()), seqinfo = new("Seqinfo", …
rownames = NULL, nrows = 0, listData = list(), elementType = "ANY", elementMetadata = NULL, metadata = list()), elementType = "ANY", metadata = list())	1	1	6	2	0	2	2	0	1	0	0	5	4	0	1
STX7:tx138619	STX7	tx138619	1.69	0.175227	19.5777	9.65919e-06	0.0468503	0.1261	0.662715	3.41741	new("GRanges", seqnames = new("Rle", values = integer(0), lengths = integer(0), elementMetadata = NULL, metadata = list()), ranges = new("IRanges", start = integer(0), width = integer(0), NAMES = NULL, elementType = "ANY", elementMetadata = NULL, metadata = list()), strand = new("Rle", values = integer(0), lengths = integer(0), elementMetadata = NULL, metadata = list()), seqinfo = new("Seqinfo", …
rownames = NULL, nrows = 0, listData = list(), elementType = "ANY", elementMetadata = NULL, metadata = list()), elementType = "ANY", metadata = list())	9	1	14	0	0	2	0	0	0	0	0	3	0	2	9
LUC7L2:tx146398	LUC7L2	tx146398	42.5073	1.03831	21.7806	3.05668e-06	0.032841	0.492485	1.89393	5.19707	new("GRanges", seqnames = new("Rle", values = integer(0), lengths = integer(0), elementMetadata = NULL, metadata = list()), ranges = new("IRanges", start = integer(0), width = integer(0), NAMES = NULL, elementType = "ANY", elementMetadata = NULL, metadata = list()), strand = new("Rle", values = integer(0), lengths = integer(0), elementMetadata = NULL, metadata = list()), seqinfo = new("Seqinfo", …
rownames = NULL, nrows = 0, listData = list(), elementType = "ANY", elementMetadata = NULL, metadata = list()), elementType = "ANY", metadata = list())	57	9	11	0	1	75	32	1	4	9	0	133	3	0	299
TOX:tx150376	TOX	tx150376	1.40526	0.270067	19.4791	1.01707e-05	0.0468503	0.146797	0.569241	2.75185	new("GRanges", seqnames = new("Rle", values = integer(0), lengths = integer(0), elementMetadata = NULL, metadata = list()), ranges = new("IRanges", start = integer(0), width = integer(0), NAMES = NULL, elementType = "ANY", elementMetadata = NULL, metadata = list()), strand = new("Rle", values = integer(0), lengths = integer(0), elementMetadata = NULL, metadata = list()), seqinfo = new("Seqinfo", …
rownames = NULL, nrows = 0, listData = list(), elementType = "ANY", elementMetadata = NULL, metadata = list()), elementType = "ANY", metadata = list())	4	0	1	1	1	2	2	0	2	3	0	1	2	0	0
GTPBP6:tx164965	GTPBP6	tx164965	8.93757	0.989901	22.3956	2.2188e-06	0.032841	0.171699	1.4009	5.63942	new("GRanges", seqnames = new("Rle", values = integer(0), lengths = integer(0), elementMetadata = NULL, metadata = list()), ranges = new("IRanges", start = integer(0), width = integer(0), NAMES = NULL, elementType = "ANY", elementMetadata = NULL, metadata = list()), strand = new("Rle", values = integer(0), lengths = integer(0), elementMetadata = NULL, metadata = list()), seqinfo = new("Seqinfo", …
rownames = NULL, nrows = 0, listData = list(), elementType = "ANY", elementMetadata = NULL, metadata = list()), elementType = "ANY", metadata = list())	6	0	3	1	1	31	22	0	1	2	0	9	2	1	2
TDP1:tx209965	TDP1	tx209965	2.44471	0.44587	19.5533	9.78302e-06	0.0468503	0.816766	7.17947e-05	-15.0369	new("GRanges", seqnames = new("Rle", values = integer(0), lengths = integer(0), elementMetadata = NULL, metadata = list()), ranges = new("IRanges", start = integer(0), width = integer(0), NAMES = NULL, elementType = "ANY", elementMetadata = NULL, metadata = list()), strand = new("Rle", values = integer(0), lengths = integer(0), elementMetadata = NULL, metadata = list()), seqinfo = new("Seqinfo", …
rownames = NULL, nrows = 0, listData = list(), elementType = "ANY", elementMetadata = NULL, metadata = list()), elementType = "ANY", metadata = list())	0	26	0	0	0	0	0	0	10	0	9	0	5	4	0
